# Supplementary material for: Diet-induced loss of adipose hexokinase 2 correlates with hyperglycemia
Source: eLife journal article supplement (doi:10.7554/elife.85103), 2023-02-20
Supplement: fig1-data1 [file Figure 1 - source data.xlsx]

## Sheet: Sheet1
Figure 1A
Log2 FC (A.U.)	ND					HFD
HK1	0.0840613	-0.366508	0.101006	0	-0.347152	-0.324343	-0.470441	-0.482457	-0.469382	-0.454887
HK2	-0.0841335	0.235697	-0.109597	0	0.106974	-0.629582	-0.69023	-0.451566	-0.552169	-0.628947
HK3	0	-0.162581	0.0977237	0.321705	-0.40417	0.166728	-0.380165	0.0120397	-0.315193	-0.21834
GLUT4	0.371663	0	-0.891008	-0.388134	0.14905	-0.152903	-0.0923476	-0.393432	-0.388876	0.335869
Figure 1C
	ND						HFD
vWAT	1.54005	0.951658	0.674112	0.720495	1.03074	1.08295	0.356725	0.268421	0.299119	0.746913	0.550287	0.329636
sWAT	0.534498	1.63248	0.628892	0.984406	0.482041	1.73769	0.197841	0.107327	0.129461	0.118366	0.0469992	0.110809
BAT	0.503326	0.412198	0.708817	1.05882	1.62012	1.69671	0.458931	0.356825	0.389326	0.486807	0.49826	0.672758
muscle	1.09553	0.892145	0.866359	1.24186	0.918492	0.985617	1.02807	0.802642	0.832776	0.777851	2.07364	1.4041
Figure 1D
HK activity (nmol/min/mg protein)
vWAT		sWAT
ND	4w HFD	ND	4w HFD
12.9433	10.5077	0.825447	2.46583
30.0441	13.0464	6.00421	0.646688
22.1634	11.5379	2.53943	0.536278
22.8624	9.08756	3.39117	1.09359
21.4275	11.1626	3.40168	0.97266
Figure 1E				Figure 1F
ND	2w HFD	HFD->ND		ND	2w HFD	HFD->ND
0.967245	0.319619	0.893738		0.860271	0.319619	0.673097
1.20489	0.273873	0.559565		0.959476	0.273873	1.0555
1.00728	0.444455	0.561898		1.01931	0.444455	0.750017
0.963377	0.260344	0.748223		1.56036	0.260344	0.726382
0.857208	0.291582	0.558307		0.600586	0.291582	0.619266
Figure 1G				Figure 1H			Figure 1I
HK activity (nmol/min/mg protein)				HK activity (nmol/min/mg protein)			HOMA-IR	HK
lean	obese non-diabetic	obese diabetes		obese non-diabetic			3.5	1.49422
6.02775	1.49422	3.03477		low	high		3.2	2.46251
4.35942	2.46251	2.96069		2.963	0.719		3.8	3.17854
2.28648	3.17854	1.64465		1.43	2.463		5.3	3.95161
2.36026	3.95161	1.7803		2.867	2.744		1.3	1.25173
2.77261	1.25173	3.08293		1.252	1.935		3.3	2.74421
4.41094	2.74421	3.43778		1.738	2.72		6.4	1.02845
3.22961	1.02845	3.27996		3.623	1.494		6.7	1.79299
2.1971	1.79299	1.15954		2.157	3.179		3.3	1.93501
3.32265	1.93501	1.14397		3.743	2.407		0.6	2.96266
2.51435	2.96266	1.69344		3.055	2.288		12.7	1.59695
4.07461	1.59695	2.55715		2.606	0.288		1.7	2.15688
4.66528	2.15688	3.3764		3.645	1.836		3.3	2.72039
5.57988	2.72039	1.20137		3.455	1.963		4	2.40736
2.6335	2.40736	1.30449			3.952		2.7	2.60559
2.6928	2.60559				1.741		5.1	1.96348
3.42786	1.96348				1.028		4	2.2877
4.24957	2.2877				1.793		8.5	1.71555
1.00885	1.71555				1.716		2	3.74349
3.02461	3.74349				1.597		1.4	1.73759
1.07783	1.73759						1.5	3.62303
3.63018	3.62303						3	0.719066
2.14328	0.719066						2.7	3.64535
1.57262	3.64535						1.2	2.86699
2.99194	2.86699						2.3	3.05524
1.50363	3.05524						0.7	1.42963
1.47348	1.42963						2.9	3.45548
3.39369	3.45548						4.3	1.83551
	1.83551						5.3	1.74121
	1.74121						4	0.287507
	0.287507
