# Supplementary material for: Diet-induced loss of adipose hexokinase 2 correlates with hyperglycemia
Source: eLife journal article supplement (doi:10.7554/elife.85103), 2023-02-20
Supplement: fig1-figsupp1-data1 [file Figure 1 - figure supplement 1 - source data.xlsx]

## Sheet: Sheet1
Figure 1 - figure supplement 1A
	fasted ND						fed ND						fasted HFD						fed HFD
AKT-pS473	0.491343	0.445277	0.567043	0.474832	0.476358	0.552474	0.61673	1.14053	1.19995	0.565743	1.15226	1.32479	0.548	0.492669	0.681467	0.612641	0.541818	0.780352	1.17188	1.03745	1.17913	1.46069	1.20886	1.15897
AKT-pT308	0.316479	0.18471	0.300723	0.294283	0.185704	0.321925	0.298706	0.761668	2.16155	0.206044	0.71684	1.85519	0.306675	0.256998	0.303579	0.33485	0.26274	0.30444	0.947813	0.763303	0.741991	1.06562	0.801829	0.769419
PRAS40-p246	0.368673	0.27289	0.331474	0.607161	0.275194	0.0906816	0.565317	1.2069	1.22779	0.565317	1.2069	1.22779	0.655854	0.307513	0.5491	0.0420282	0.0321191	0.0704741	1.23936	1.43352	1.27636	0.260829	1.05046	11.2371039*
FASN	0.888736	0.915843	0.672798	0.495636	1.20727	0.774469	0.434415	1.06061	1.19138	0.771527	1.33354	1.20853	0.473918	0.235039	0.666329	0.618089	0.221411	0.556718	0.126709	0.262129	0.1682	0.120462	0.211102	0.100146
Figure 1 - figure supplement 1B
body weight (g)
ND	4w HFD
23.2	23.4
23.1	26.7
23	24.1
23.6	23.5
21.5	25
Figure 1 - figure supplement 1C
	blood glucose (mM)
time (min)	ND					4w HFD
0	6.5	7.8	8.5	8.2	8.2	8.2	9.4	11.3	9.3	9.7
10	4.9	6.3	6.2	5.6	7.3	10.1	11.8	8.7	10.5	10.7
20	3.5	4.5	5.3	4.9	6.2	5.4	6	4.3	5.5	5.4
30	2.4	3	4.4	4.3	5	5.9	6.7	4.1	4.1	4.8
45	1.9	2.4	3.7	3.4	4	3.4	4.8	3.6	3.8	4.9
60	1.7	3.2	3.3	3.5	4.6	4.3	4.9	3.7	4	3.8
90	2.6	3.4	4.2	3.8	4.7	4.8	4.9	5.3	5.1	4.4
Figure 1 - figure supplement 1D
	blood glucose (mM)
time (min)	ND					4w HFD
0	10.1	12	9	9	8.2	11.6	10.3	9.2	12.1	9.3	9.4	8.7	9
15	22.6	21.8	20.5	20.5	23.5	31.5	30.6	27.2	28	24.8	29.1	24.1	24.9
30	23.1	22	23	17.5	23.5	33	29.5	25.5	30.2	28.6	27.9	28.1	28.4
45	24.9	19.5	21.1	17.3	20	33	31	29	33	32.1	28	26.7	26.4
60	24.2	14.7	21.5	15.7	17	32.4	26.9	27.4	33	26.5	27.2	22	27
90	19.9	11.4	15.8	16.3	12.3	23	18.3	21.2	23.9	18.6	18.2	17.9	18.3
120	11.3	9.7	11.5	9.2	8.9	15.8	13.9	18.6	20.9	11.1	15.8	11.8	14.7
Figure 1 - figure supplement 1E
relative intensity (A.U.)
HK1	HK2	HK3
1.03328	4.37487	0.230566
0.866988	4.96122	0.215137
1.04012	4.33128	0.240367
1	4.52204	0.264432
0.873548	4.71633	0.194096
Figure 1 - figure supplement 1F
	ob/+			ob/ob
vWAT	0.846337	0.95896	1.1947	0.565267	0.641496	0.663281
sWAT	0.94029	1.33749	0.722217	0.472098	0.507168	0.451449
