# Supplementary material for: Diet-induced loss of adipose hexokinase 2 correlates with hyperglycemia
Source: eLife journal article supplement (doi:10.7554/elife.85103), 2023-02-20
Supplement: fig1-figsupp2-data1 [file Figure 1 - figure supplement 2 - source data.xlsx]

## Sheet: Sheet1
Figure 1 - figure supplement 2A
body weight (g)
0 w HFD	1 w HFD	2 w HFD	4 w HFD
25.2	25	26.7	25.1
23.8	23.6	25.9	28.3
22.1	23.9	25.7	26.3
21.2	23.8	24.9	27.7
22.7	22.3	24	25
21.8	26.8	24.1	28.6
23.6	23.8	25.4	26.3
23.8	27.8	26	26.7
24.3	28.6	26.7	27.1
21.2	25.9	26.7	26.8
Figure 1 - figure supplement 2B
6 h fasting glucose (mM)
0 w HFD	1 w HFD	2 w HFD	4 w HFD
9	10.1	11.9	10
8.6	10	10.2	8.4
8.3	9.6	8.5	10.3
8.6	12	10.7	13.8
8.4	9.5	11.2	7.5
8	8.4	10.5	7.3
7.8	11.2	8.7	10.6
8.4	11	11.1	10.4
8.5	9.8	10.8	12
6.5	9.7	9.3	9.8
Figure 1 - figure supplement 2C
ITT AUC (A.U.)
0 w HFD	1 w HFD	2 w HFD	4 w HFD	2 w HFD + 2 w ND
222	260.5	315.5	255.5	170.5
224.5	240.5	298.5	229	152.5
210.5	282.5	212.5	281	117
178	318	296	311	190
167.5	251.5	332.5	186	200
195	217.5	211.5	195	216.5
194	233.5	231	219.5
185.5	222	249	243.5
	228.5	230	268.5
	224.5	191.5	222
Figure 1 - figure supplement 2D
	0					1					2					4
HK2	1.25303	1.14516	0.601807	1.20096	0.799039	0.186195	0.156891	0.580247	0.724253	0.500086	0.191179	0.151343	0.103237	0.110133	0.476156	0.201952	0.284684	0.613239	0.379456	0.143947
GLUT4	1.0001	0.961732	1.03817	1.09557	0.904432	0.838483	0.688198	0.901578	1.07981	0.999916	0.760069	0.976795	0.812172	1.09108	0.957253	0.745148	0.767021	0.535349	0.50004	0.643302
AKT-pS473	1.09916	0.94208	0.958764	0.690055	1.30994	1.60437	1.40121	2.2323	0.888212	0.872937	1.69685	2.24556	1.60477	0.664109	0.379123	1.53744	1.46946	1.0938	0.458178	0.570113
Figure 1 - figure supplement 2E
	0					1					2					4
HK2	1.52206	0.914344	0.5636	1.48723	0.512767	0.16883	0.126162	0.167219	0.357151	0.27765	0.129745	0.10436	0.108354	0.445044	0.453212	0.112069	0.0696393	0.036149	0.381094	0.184588
GLUT4	0.873729	1.01797	1.10831	1.04593	0.954072	0.759753	0.728973	0.491056	0.545276	0.672955	0.280844	0.376641	0.581517	0.784151	0.734275	0.389492	0.355453	0.409578	0.654284	0.523431
AKT-pS473	1.22991	1.27915	0.49094	0.925369	1.07463	0.90438	1.49586	1.42498	1.8521	1.83787	1.24299	2.07706	2.05231	1.65678	1.55605	1.85231	1.8584	0.910694	1.93534	1.32283
Figure 1 - figure supplement 2F
	0								1								2								4
HK2	1.23651	1.32219	0.441296	1.003	0.997002	0.869562	1.0379	1.09254	0.464774	0.540618	0.773449	0.532258	0.545029	0.796866	0.81678	0.568419	0.441643	1.18483	1.11491	0.42636	0.441087	0.659497	0.521605	0.379761	0.805063	0.195682	0.765711	0.492633	0.527279	0.434192	0.412457	0.329921
GLUT4	1.21063	0.920522	0.868844	0.948536	1.05146	0.966284	1.07215	0.96157	0.590684	0.0463016	0.24481	0.953199	0.960254	1.20975	0.886416	0.795585	0.653717	0.549276	0.110759	0.860175	0.268498	0.78601	0.79597	0.737561	0.933463	0.97494	0.507729	0.160751	0.606201	0.745158	0.803907	0.777051
AKT-pS473	1.73655	0.828485	0.434964	0.827808	1.17219	0.818739	1.04171	1.13955	0.116993	0.476808	0.0955012	0.645693	0.239713	0.303595	0.367793	0.560827	0.267096	0.227901	0.211402	0.0379799	0.26249	0.295928	0.211236	0.397071	0.231407	0.0800184	0.237243	0.22582	0.198357	0.324616	0.287775	0.522038
