# Supplementary material for: Diet-induced loss of adipose hexokinase 2 correlates with hyperglycemia
Source: eLife journal article supplement (doi:10.7554/elife.85103), 2023-02-20
Supplement: fig2-data1 [file Figure 2 - source data.xlsx]

## Sheet: Sheet1
Figure 2F				Figure 2F WB
HK activity (nmol/min/mg protein)				HK2 expression
empty	surface HK2	molino HK2		empty	surface HK2	molino HK2
40.082	121.23	52.459		0.000116746	0.710605	0.949587
40.3279	137.131	53.1148		0.00696974	1.1189	1.29816
36.9672	138.934	44.5902		0.000200883	1.06715	1.10528
38.4426	136.639	56.4754		0.0316819	1.10335	1.34299
Figure 2G				Figure 2G WB
HK activity (nmol/min/mg protein)				HK2 expression
empty	HK2-WT	HK2-R42H		empty	HK2-WT	HK2-R42H
23.4903	304.843	125.709		0.067471	0.617574	0.735826
23.7735	266.055	144.927		0.0486391	0.586102	0.440995
22.7071	315.965	153.067		0	1.22291	1.29934
30.7483	259.324	146.887		0	1.57341	1.4435
