# Supplementary material for: Diet-induced loss of adipose hexokinase 2 correlates with hyperglycemia
Source: eLife journal article supplement (doi:10.7554/elife.85103), 2023-02-20
Supplement: fig3-data1 [file Figure 3 - source data.xlsx]

## Sheet: Sheet1
Figure 3A					Figure 3A
HK2 (A.U.)					AKT-pS473 (A.U.)
control	control+insulin	shHK2	shHK2+insuilin		control	control+insulin	shHK2	shHK2+insuilin
0.895241	1.12866	0	0		0	0.91471	0	1.06438
0.875697	0.768449	0	0		0	1.13114	0	1.08448
0.978331	1.10289	0.0152961	0.0195172		0	0.954147	0.00203475	0.813435
Figure 3B
HK activity (nmol/min/mg protein)
control	shHK2
63.8073	31.973
57.9413	35.7149
55.3356	32.2498
Figure 3C
	ECAR (mpH/min)
time	control								shHK2
1.61798	51.1853	38.9874	44.8519	43.2494	41.7217	39.9595	33.5954	55.6549	36.3792	34.8492	34.8742	37.0402	32.9438	41.6775	40.2579	42.7794
8.75863	60.4456	35.4606	36.498	38.1926	37.2636	38.1976	43.0718	54.6426	39.4414	34.578	33.4475	30.7652	30.8153	34.0255	32.4602	43.4201
15.8816	62.9224	38.0838	40.2423	39.467	38.2051	42.627	46.4051	57.7859	40.1403	36.7986	33.4031	33.066	32.3428	35.5305	38.4747	45.5515
23.1203	64.4373	42.0348	53.4757	51.8213	48.8984	47.9802	60.5436	57.5802	42.3385	40.3949	38.0992	37.9764	39.7688	42.2591	43.8381	45.9534
30.2625	60.1065	39.4358	50.8431	47.3654	44.7314	44.5132	53.3489	52.2229	40.7329	37.2265	36.8331	38.3121	38.2364	42.2503	44.3266	43.8918
37.4044	58.132	38.273	49.9272	45.7844	43.1216	43.4424	51.0468	50.1688	40.9181	36.9802	36.8411	37.7078	37.0385	42.0254	43.3857	43.6651
44.6348	34.8744	25.2329	31.5388	29.672	28.0463	28.8001	33.0872	36.7754	32.1938	31.1552	26.984	26.2198	25.8075	29.7017	28.7838	30.9693
51.7952	25.2942	19.1701	24.4876	22.8709	21.6388	21.3541	25.312	24.6213	23.6889	22.4655	22.5318	23.8933	22.1466	25.4575	25.3569	25.2778
58.9452	24.0916	18.4943	23.6203	21.6072	20.4227	20.3593	24.2529	22.923	22.0593	21.1724	21.8632	23.7543	21.1956	24.3784	24.2844	24.6419
Figure 3D					Figur 3E
lactate (mM)					relative 3H-2DG (A.U.)
control	control+insulin	shHK2	shHK2+insuilin		control	control+insulin	shHK2	shHK2+insuilin
15.4	18.1	12.2	13.3		1.01464	5.44729	1.22554	3.00996
13.6	15.4	11.9	12.4		0.952685	5.17397	1.36072	3.01525
14.1	17.2	11.6	12.9		1.03267	4.95876	1.36624	2.9594
