# Supplementary material for: Diet-induced loss of adipose hexokinase 2 correlates with hyperglycemia
Source: eLife journal article supplement (doi:10.7554/elife.85103), 2023-02-20
Supplement: fig3-figsupp1-data1 [file Figure 3 - figure supplement 1 - source data.xlsx]

## Sheet: Sheet1
Figure 3- figure supplement 1
	mRNA (A.U.)
	control			shHK2
Adipoq	1.07416	0.866464	1.05937	0.948166	1.15927	1.29523
aP2	0.85451	1.21686	0.928626	0.860453	1.25108	0.981574
