# Supplementary material for: Diet-induced loss of adipose hexokinase 2 correlates with hyperglycemia
Source: eLife journal article supplement (doi:10.7554/elife.85103), 2023-02-20
Supplement: fig4-data1 [file Figure 4 - source data.xlsx]

## Sheet: Sheet1
Figure 4A
	fasted control						refed control						fasted AdHk2KO						fed AdHk2KO						fold change
HK2	1.26637	1.30336	0.812019	0.893125	0.772762	0.878709	1.27233	0.680274	1.04739	0.883197	1.11471	1.0021	0.133956	0.124604	0.246641	0.273166	0.162166	0.27701	0.49416	0.421443	0.193859	0.259652	0.345527	0.245382	73.3567
AKT-pS473	0.153037	0.284025	0.540715	0.633705	0.169945	0.60597	1.39741	0.768562	0.83403	1.10362	0.883018	1.01336	0.218354	0.159774	0.347432	0.512326	0.339052	0.622249	0.750627	1.46562	0.594525	1.27966	1.45894	1.17007
AKT-pT308	0.21077	0.260096	0.314706	0.378236	0.302976	0.586591	1.69634	0.720823	0.582836	1.04376	0.823761	1.13248	0.193229	0.160938	0.200523	0.569905	0.287517	0.25126	0.756564	0.908481	0.258297	0.484312	0.496102	0.677661
PRAS40-p267	0.278075	0.166264	0.365521	0.712172	0.308678	0.64064	1.36469	0.656182	0.979133	1.00798	0.961112	1.03091	0.101997	0.0445327	0.272825	0.126357	0.3308	0.265445	1.31676	2.06384	1.11794	0.415383	0.440414	0.68752
Figure 4B
	control									KO
G6P	0.583468	2.01297	0.554295	1.05024	0.948136	1.15235	1.05024	0.656402	0.991896	0.525122	0.962723	0.598055	0.495948	1.25446	0.787682	0.816856	0.481361	0.598055	0.816856
F6P	0.435444	2.05073	0.68834	0.99749	0.893813	1.2975	1.16417	0.49845	0.974064	0.533499	0.860902	0.608276	0.527261	0.928443	0.778015	0.819154	0.421268	0.569769	0.874401
F1,6P	0.954528	1.47211	0.5785	0.477686	0.541919	2.14963	1.46826	0.593904	0.76346	0.532204	0.881945	0.70388	0.490855	0.997667	0.999019	1.02863	0.672411	0.665201	0.582079
DHAP	0.791652	2.05618	0.594507	0.557792	0.47619	1.86076	1.26093	0.492694	0.909304	0.611987	0.948198	0.678639	0.750782	1.44922	0.870639	0.944215	0.623564	0.811448	0.536068
3PG	0.981413	0.922305	1.32825	0.707063	0.704833	1.25353	1.56134	0.662454	0.87881	0.647955	0.952416	1.24238	0.97026	0.669145	0.631227	0.610037	0.952416	0.550929	0.603346
2PG	0.853248	1.00168	1.06227	0.784584	1.01279	1.19354	1.46314	0.683608	0.945136	0.665433	1.04712	1.27533	1.1895	1.05722	1.24403	0.706833	1.04813	0.691686	0.952205
S7P	1.07045	1.95814	0.932449	1.06299	1.02569	0.604227	1.20845	0.466225	0.671363	0.611687	0.619146	0.492333	0.842934	0.697472	0.619146	1.04061	0.783257	0.566929	0.958558
pyruvate	0.577004	0.956302	1.16563	1.66743	0.572828	1.30504	0.768811	0.747644	1.23931	0.47713	0.617037	0.780342	1.10533	0.543655	0.545581	0.533658	0.638906	0.352419	0.693994
acetyl-CoA	0.560838	0.625609	0.883878	0.980627	0.738115	1.01496	1.64345	1.4428	1.10973	0.837714	1.13651	2.06546	1.37747	0.845577	0.915236	0.802128	1.9047	1.08101	1.26432
Figure 4C
	blood glucose (mM)
time (min)	control						AdHk2KO
0	9.9	10.3	7.8	11.3	8.8	8.8	9.9	8.4	9.9	11.6	9.7	8.2	8.8	7.9	9.5	9.9
10	8.4	10	9.2	8.9	7.7	9	9.2	9.2	9.9	13.7	8.4	8.8	8.3	8.2	10.5	11.3
20	6.3	5.7	4.3	5.2	5.2	5.7	5.5	5	6.3	7.5	4.9	5.8	6.4	6.7	9.5	7.9
30	5.2	5.6	5	5.5	4.5	5.4	6	6.1	6.5	6.3	5.4	5.4	6	5.7	6.4	5.9
45	4.4	4.8	4.3	5.3	4.1	5.4	5	5.3	6.2	6.4	5.5	6	6.8	5.7	6.5	5.4
60	3.9	4.8	4.6	4.3	5	4.7	5	5.5	4.7	6.3	5	6.5	6.5	6.7	7.8	5
90	3.8	4.4	4.2	4.3	3.9	4.5	5.7	5.7	5.2	7.2	4.9	6.5	5	6.3	6.2	4.7
Figure 4D
	blood glucose (mM)																				AUC
time (min)	control							AdHk2KO													control	AdHk2KO
0	9.4	9.2	10.2	8.4	8.3	9.4	9.3	11.3	8.2	9.8	10.6	9.5	9.8	14.9	9.4	11.4	12.4	11	10.5		1445	1968
15	21.8	19.1	20.8	20.6	16.4	22.4	24.2	24.9	21.2	18.3	29.2	19.5	28.4	31.9	32.7	24.1	28.6	25.7	23.2		1403	1360
30	14	14.7	20.9	18.8	14.2	19.5	24.6	23.3	15.2	19.7	29.9	18.6	33	33	33	23.4	29.5	20.8	24		1693	1739
45	12.8	12	16.5	15.5	11.9	17.8	22.5	20.3	12.2	17	28.6	16.2	33	33	33	22.4	24.7	21.1	21.6		1534	2708
60	11.3	10.7	13.7	12.7	13.3	13.8	17.9	17.1	10.5	15.4	26.7	13.4	33	33	33	19.9	24.8	19.6	17.4		1359	1589
90	9.3	9.7	9.9	8.7	8.2	9.7	12.3	11.4	7.8	11.6	18.5	9.3	24.9	28.1	29.4	14.6	15.7	13.7	11.4		1697	3228
120	7.5	7.7	9.2	6.7	7.6	8.6	10.8	8.6	6.6	9.7	10.5	8.2	16.6	21.1	20.8	11.8	15	10.8	10.5		2073	3482
																						3488
Figure 4E
	blood glucose (mg/dL)
time (min)	control						AdHk2KO
0	170	158	191	132	198	195	189	169	185	154	173	128	224
5	148	133	143	100	159	154	207	159	183	140	145	115	203
10	120	136	126	86	132	143	214	143	160	153	169	140	191
15	118	121	116	89	182	175	230	166	170	167	170	148	193
20	104	133	105	113	182	183	239	133	210	160	173	142	192
25	117	135	108	140	182	155	213	120	204	192	174	142	187
30	103	134	117	172	179	185	177	109	207	175	161	138	189
40	109	138	137	204	188	174	147	103	193	152	182	138	174
50	136	132	121	182	153	163	153	111	175	181	192	139	173
60	112	126	143	165	147	161	137	104	153	198	170	139	179
70	107	128	149	150	168	165	143	127	156	201	172	127	166
80	105	155	151	143	181	155	164	121	184	190	154	130	176
90	126	155	141	152	186	135	156	135	177	200	142	135	164
Figure 4F
	blood glucose (mg/dL)														GIR (mg/kg/min)
time (min)	control						AdHk2KO								control	AdHk2KO
0	2.29	4.43	1.84	6	4.43	0.42	1.9	1.92	0.43	0	0	0	0		20.1909	2.28102
5	4.59	4.43	3.68	10.29	8.87	4.98	0.38	1.92	0	0	0	0	0		14.4799	11.5314
10	7.34	4.43	5.52	15	11.08	8.3	0.38	1.92	0	0	0	0	0		13.2509	0
15	9.18	6.65	7.36	18.86	11.52	8.3	0.38	1.92	0	0	0	0	0		15.43	0
20	11.47	6.65	11.04	18.86	17.73	7.47	0	2.31	0	0	0	0	0		27.48	0.145892
25	12.39	6.65	12.88	18.86	19.5	8.3	1.52	2.69	0	0	0	0	0		8.99	0
30	13.77	6.65	13.62	17.15	22.16	7.89	3.04	3.46	0	0	0	0	0			0
40	16.52	6.65	13.25	8.57	26.6	7.89	3.04	4.61	0	0	0	0	0
50	15.6	8.87	13.99	8.14	23.94	8.3	2.66	6.15	0	0	0	0	0
60	17.44	13.3	13.62	10.72	26.6	8.3	2.66	9.23	0	0	0	0	0
70	19.27	15.07	13.25	12.86	26.6	8.3	2.66	11.53	0	0	0	0	0
80	20.65	14.18	13.25	18	28.37	8.72	2.28	11.53	0	0	0	0	0
90	20.65	14.18	13.25	18	28.37	9.96	1.9	11.53	0	0	0.44	0	0
