# Supplementary material for: Diet-induced loss of adipose hexokinase 2 correlates with hyperglycemia
Source: eLife journal article supplement (doi:10.7554/elife.85103), 2023-02-20
Supplement: fig4-figsupp1-data1 [file Figure 4 - figure supplement 1 - source data.xlsx]

## Sheet: Sheet1
Figure 4 - figure supplement 1B
	fasted control						fed control						fasted AdHk2KO						fed AdHk2KO
HK2	1.24011	1.17181	0.8345	1.24101	1.02068	1.11584	1.31272	0.705987	0.981296	0.938647	1.05007	1.01129	0.196998	0.152714	0.276493	0.353589	0.256832	0.262868	0.513597	0.451595	0.188397	0.22419	0.339795	0.368923
AKT-pS473	0.145984	0.288999	0.54411	0.666666	0.26263	0.664376	1.37762	0.769159	0.853224	1.09653	0.905179	0.99829	0.22377	0.159267	0.35992	0.59673	0.426739	0.67685	0.778747	1.50691	0.576892	1.27305	1.32123	1.16331
AKT-pT308	0.311111	0.341253	0.359911	0.483637	0.50281	0.723284	1.64483	0.719889	0.635279	1.02281	0.868135	1.10905	0.263706	0.253373	0.268203	0.712515	0.454991	0.415859	0.831452	0.957647	0.323324	0.609645	0.624556	0.752217
PRAS40-p267	0.233342	0.162689	0.359797	0.746992	0.43785	0.729512	1.3647	0.640327	0.994971	1.02883	1.19349	0.777688	0.0952929	0.0425268	0.267704	0.24199	0.616015	0.585292	1.30808	2.02854	1.00109	0.946447	0.986006	1.19534
Figure 4 - figure supplement 1C
	fasted control						fed control						fasted AdHk2KO						fed AdHk2KO
HK2	0.743664	0.888193	0.729653	0.887395	1.22389	0.748166	1.22352	1.0069	0.769582	0.977357	1.04568	0.976963	0.123718	0.17885	0.119228	0.380787	0.28	0.595633	0.179689	0.144388	0.219773	0.480289	0.463683	0.561521
AKT-pS473	0.0971298	0.174843	0.27587	0.753714	0.627223	0.852345	1.61293	0.532183	0.854888	1.1708	0.916369	0.912831	0.0879835	0.153042	0.16158	0.771804	0.924243	0.676617	0.657831	0.735101	0.877603	1.0979	1.40567	1.35747
PRAS40-p267	0.0294146	0.0996903	0.192741	0.0927244	0.161693	0.172035	1.52089	0.602234	0.876881	1.00899	1.09038	0.900633	0.0447962	0.0208738	0.0917485	0.1047	0.134754	0.201722	0.814082	0.811188	0.761556	1.12392	1.61211	2.54125
Figure 4 - figure supplement 1D
	fasted control							fed control								fasted AdHk2KO							fed AdHk2KO
HK2	1.01984	0.610738	1.26346	0.596072	0.641446	1.64212	1.24649	1.00429	0.922648	1.07307	0.874872	1.12513	0.880819	0.86608	1.2531	1.2171	1.6171	1.35426	1.1655	1.27059	1.39951	1.85699	1.21437	1.09488	0.717027	1.04997	1.07613	2.70017	2.87366	3.15893
AKT-pS473	0.191576	0.258731	0.261843	0.153382	0.412795	0.346356	0.515236	1.02488	0.764262	1.21086	1.1431	0.856903	0.730336	0.982854	1.28681	0.285637	0.216793	0.256345	0.183929	0.353233	0.311828	0.423106	0.899025	1.31836	0.886596	1.48869	2.99327	1.83955	1.70097	1.75457
AKT-pT308	0.278364	0.350986	0.534782	0.346956	0.793555	0.595278	0.564376	1.22232	0.952756	0.824926	1.042	0.958004	0.60497	1.04318	1.35185	0.227709	0.417538	0.330118	0.688915	0.544422	0.6587	0.860664	1.28904	1.55078	1.09952	1.44859	1.39175	1.92649	1.53476	1.31128
pPRAS40	0.185461	0.29599	0.316528	0.196272	0.521858	0.0912101	0.243669	0.98324	1.06696	0.949796	0.553409	1.44659	0.909728	1.17582	0.914456	0.265213	0.342268	0.357311	0.897329	0.722109	0.137903	0.0992897	1.34339	1.25952	1.15476	1.06441	1.40913	1.10289	0.78726	0.97572
			`
