# Supplementary material for: Diet-induced loss of adipose hexokinase 2 correlates with hyperglycemia
Source: eLife journal article supplement (doi:10.7554/elife.85103), 2023-02-20
Supplement: fig4-figsupp2-data1 [file Figure 4 - figure supplement 2 - source data.xlsx]

## Sheet: Sheet1
Figure 4 - figure supplement 2A
	body weight (g)
age (weeks)	control															AdHk2KO
5	16.9	17.9	16.8	11	18.3	13.4	18.5	14.7	18.6	18.6	10.3	18.7	16	14.8	13.7	18.9	14.5	17.1	13.1	11.8	16.1	19	17.3	13.7	14.7	8.4	12.5	10.4	16.4	17.8	14.4	14.2
6	19	19.3	19.2	11.6	19.7	19.3	14.3	17	20.2	20.2	10.4	20.8	16.4	16.3	14.1	21.3	16.8	19.3	14.5	11.6	17.9	21.5	19.2	16.2	15.6	9.1	13.6	10.6	18.1	19	15.1	14.1
7	20.2	21.5	20.4	15.4	20.6	21.3	15.8	17.6	21.6	21.5	12.5	22.8	17.3	18.1	16.9	22.5	18.7	20	17	14.2	17.2	22.1	20.6	17.4	16.4	11.2	14.5	13	20.4	20.2	17.5	16.8
8	22.1	23.4	21.5	16.8	21	23.3	17.3	19.2	23.4	22.7	16.3	23.9	19.5	18.2	20.1	23.1	19.1	20.3	17.9	16	19.3	22.3	21.6	18.4	17.6	13.9	16.9	15.1	21.7	21.4	18.4	17.7
9	24	24.9	22.7	20.3	22.5	24.3	20	20.6	23.6	23.8	18.3	24.7	21.2	22.4	20.6	24.4	21.4	21.1	20.9	17.5	20.6	23	23.1	19	19.5	16.3	18.8	18.9	23.7	22.6	19.9	20.8
10	24.5	25.4	23.5	21.9	22.5	26.1	21.7	20.8	24.3	24.6	20.4	25.1	22.1	22.4	21.4	25.1	21.5	21.9	22.5	19.6	21.3	24.2	23.6	21.1	20.6	18.7	20.4	20	23.7	23	20.9	20.2
11	23.7	26	23.7	21.5	22.7	25.8	22	21.3	24.4	24.3	19.5	24.9	23.1	22.7	21.9	25.5	22.8	21.7	22.1	19.5	21.2	24.2	23.1	21.4	20.8	18.3	20.5	19.9	24.3	23.9	21.7	20.7
12	24.5	25.9	23.7	22.5	23.2	26.5	22.9	21.1	25.1	25	20	25.9	23.3	23.2	21.6	25.5	22.8	22	22.5	20.5	22.1	24.6	24	21.7	21.4	19	20.1	20	24.1	24.5	21.7	21.1
13	25.7	26.7	23.9	23.1	23.6	26.1	23.5	21.6	25.2	25	20.4	26.9	24.1	23.9	22.8	24.8	22.9	22.1	23	21.4	21.8	24.4	24.2	22	21.8	19.6	20.8	20.4	24.2	24.9	22.6	21.7
14	26.3	26.7	23.9	23.6	24.8	27.4	25.2	22.9	26	26	20.4	27.4	24.1	23.9	22.5	25.5	23.9	23.1	22.7	21.8	24.1	25.9	25.3	23.8	23.1	20.1	20.6	19.9	24.3	25.1	22	21.2
15	26.9	27	24.3	24.4	24.7	27.2	25.5	22.8	25	25.4	20.3	28.1	24.9	24.4	23	25.6	24.9	23.7	23.9	22.2	24.2	26.6	25.9	23.5	23.4	20.1	20.7	20.8	25.1	25.8	22.7	21.5
Figure 4 - figure supplement 2B
lean mass (% body weight)		fat mass (% body weight)
control	AdHk2KO	control	AdHk2KO
75.4049	80.2479	15.7206	12.7645
75.0368	76.4173	15.7279	14.4098
79.5922	81.3787	11.3569	11.2213
77.8421	79.3974	13.7149	12.7009
78.1367	79.417	13.0508	11.556
79.3189	76.5423	12.1024	14.3731
77.6749	76.4783	13.5862	14.3913
78.3879	79.2308	12.1779	10.2452
76.4826	79.5078	13.4261	10.6744
81.0902	78.8889	9.61066	10.2381
76.5582	81.0558	13.8594	10.5535
77.9312	81.9824	14.9565	8.99559
75.6714	83.1948	10.6571	8.83146
77.1612	79.6339	14.3017	10.2362
76.4302	77.0431	10.2364	9.00431
	80.9113		11.8105
	76.8515		10.4236
Figure 4 - figure supplement 2C
	tissue weight (%body weight)
	control												AdHk2KO
vWAT	2.1215	1.3839	1.75726	1.38674	2.03658	1.44076	1.51745	2.14661	1.58699	2.29775	1.31693	2.05451	1.14275	1.39434	1.09397	1.7754	1.32582	1.50602	1.60846	1.33932	2.42877	2.11071	1.68263	1.63435	1.62201	1.43029	1.28298
sWAT	1.46519	1.25171	1.55081	1.02462	1.50739	1.57983	1.43927	1.8	1.10959	1.63745	1.0248	1.32623	1.0558	1.08943	0.892672	1.35726	1.11189	1.55984	1.60846	1.36368	1.55616	1.63795	1.33052	0.927863	1.12164	1.17012	1.15447
BAT	0.358362	0.348288	0.304032	0.260606	0.355642	0.262605	0.397091	0.376018	0.281164	0.372285	0.225984	0.318443	0.310145	0.320377	0.285776	0.289516	0.231557	0.324096	0.318846	0.310684	0.252511	0.317857	0.207512	0.298473	0.311194	0.304149	0.261277
Figure 4 - figure supplement 2D
	tissue weight (%body weight)
	control												AdHk2KO
liver	3.83276	5.04555	5.09839	5.46591	4.92374	5.08109	3.95855	4.97059	5.26644	4.70187	5.2374	4.74057	5.54348	4.57509	5.25043	5.46694	5.39467	4.92374	5.08109	3.95855	5.47945	5.05804	4.99577	5.44351	5.20821	5.7917	5.63617
kidney	1.27099	1.0863	1.12984	1.19015	1.1821	1.26681	1.44291	1.08281	1.20205	1.19064	1.21063	1.18156	1.17464	1.42226	1.15043	1.09919	1.09877	1.1821	1.26681	1.44291	1.20776	1.13393	1.01033	1.17977	1.06343	1.07884	1.14511
spleen	0.435154	0.313699	0.408871	0.393939	0.34786	0.387395	0.512727	0.325792	0.306507	0.352809	0.349213	0.335246	0.408696	0.501887	0.398276	0.420968	0.385656	0.34786	0.387395	0.512727	0.473973	0.358482	0.396244	0.38855	0.321269	0.389627	0.386383
heart	0.461092	0.397603	0.433871	0.451136	0.407004	0.421849	0.509091	0.527149	0.432192	0.464045	0.412205	0.492213	0.483333	0.509434	0.503017	0.677419	0.522131	0.407004	0.421849	0.509091	0.447945	0.460268	0.419249	0.449237	0.333582	0.458091	0.394468
pancreas	1.57816	1.11267	1.19597	1.11856	1.21907	2.10042	2.38618	2.381	1.93322	2.14794	1.41181	1.91475	1.05326	1.6966	0.9625	1.12258	1.27172	1.21907	2.10042	2.38618	2.04384	1.89732	1.62066	1.47672	1.56493	1.35021	1.54553
Figure 4 - figure supplement 2F			Figure 4 - figure supplement 2G
leptin (ng/mL)			adiponectin (ug/mL)
control	AdHk2KO		control	AdHk2KO
5.52162	5.73183		14.569	11.1844
6.0021	5.11321		10.596	10.4551
3.75686	1.38849		11.4049	10.0314
1.36847	2.57868		8.57411	7.82882
6.75486	3.50961		10.4341	8.46062
5.47457	10.1132		9.39169	10.2317
2.15926	4.897		8.41653	9.43651
3.32042	5.18328		9.88253	9.97795
8.33343	2.95706		13.5475	10.5555
4.72583	1.73283		11.2741	9.77049
5.48859	8.74384		11.4288	7.90906
3.04815	7.47958		11.4331	8.82062
3.83293	2.61171		9.58326	9.22688
1.58969	2.6017		9.30712	11.342
2.45355	3.84294		10.1543	9.3194
4.42653	5.19229		8.91098	8.19388
Figure 4 - figure supplement 2H
	mRNA (A.U.)
	control									AdHk2KO
Lep	1.27676	0.58743	1.49743	0.63838	1.21591	0.603756	1.38707	0.87178	0.921488	1.32179	0.421174	0.785938	0.825013	0.591516	4.03351	2.33276	1.51786	1.28524	1.50737	2.53509	1.48662
Adipoq	0.894148	0.857724	1.13965	1.10848	1.08234	0.729081	1.16809	0.982243	1.03825	1.09322	0.992119	1.82587	1.49338	0.975458	0.891404	0.825964	0.744401	1.75826	1.4888	1.11277	0.879132
Figure 4 - figure supplement 2I
	mRNA (A.U.)
	control									AdHk2KO
Lep	1.91704	0.817269	0.992324	0.273362	1.46193	0.783429	1.42195	0.636342	0.696345	1.62325	0.767843	0.562094	0.161419	0.492735	2.59885	2.74703	2.11092	0.573504	0.971223	1.88933	4.02189
Adipoq	1.06766	0.744559	1.09768	1.0901	0.823557	1.27451	0.852599	1.00691	1.04242	0.749737	0.657224	0.754952	0.719196	0.765491	1.11724	0.972615	1.11724	1.35655	1.31034	0.852599	0.907481
Figure 4 - figure supplement 2J
	mRNA (A.U.)
	control										AdHk2KO
Ucp1	0.278784	0.495591	1.42131	0.810689	1.01201	1.06971	2.70799	0.777665	0.715598	0.710655	0.597587	0.7564	1.19517	1.09219	0.924805	0.918417	0.862874	1.32613	1.07715	0.715598
Dio2	0.313321	0.576628	1.35258	1.34324	0.695303	0.68573	2.13719	0.613746	1.44966	0.83261	0.270878	0.530606	0.874005	0.956418	1.55371	1.17749	0.700139	2.22794	0.75039	0.745207
