# Supplementary material for: Diet-induced loss of adipose hexokinase 2 correlates with hyperglycemia
Source: eLife journal article supplement (doi:10.7554/elife.85103), 2023-02-20

Figure 4 - figure supplement 3A vWAT

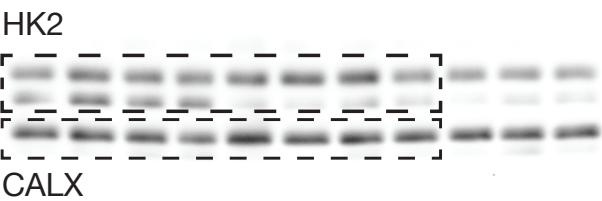

Figure 4 - figure supplement 3A sWAT

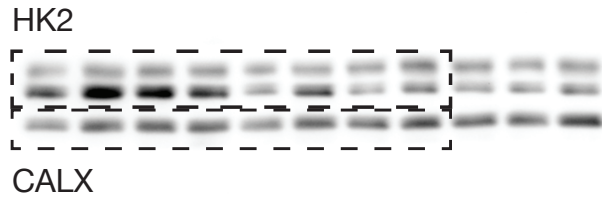

Figure 4 - figure supplement 3A BAT

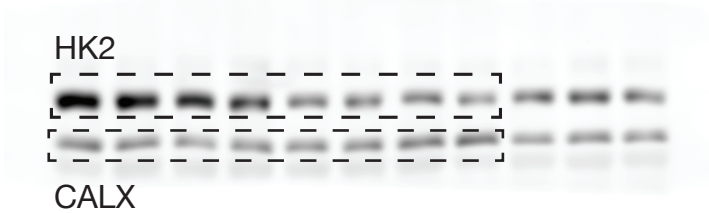

Supplement: fig4-figsupp3-data1 [file Figure 4 - figure supplement 3 - source data.pdf › Figure 4 - figure supplement 3 - source data/Figure 4 - figure supplement 3 - source data.pdf]
