# Supplementary material for: Diet-induced loss of adipose hexokinase 2 correlates with hyperglycemia
Source: eLife journal article supplement (doi:10.7554/elife.85103), 2023-02-20
Supplement: fig4-figsupp3-data1 [file Figure 4 - figure supplement 3 - source data.xlsx]

## Sheet: Sheet1
Figure 4 - figure supplement 3B
	control				hetero KO
vWAT	0.700925	1.17224	0.922352	1.20448	0.279069	0.229014	0.382958	0.318197	0.0988228	0.244094	0.213045
sWAT	1.0025	1.20876	1.0012	0.787532	0.389441	0.606239	0.264118	0.374892	0.297641	0.30257	0.313747
BAT	1.09763	1.0589	1.02936	0.814101	0.499623	0.474194	0.384521	0.302581	0.640235	0.630519	0.524711
Figure 4 - figure supplement 3C GTT
time (min)	control blood glucose (mM)												hetero KO blood glucose (mM)
0	5.7	7.3	6.3	6.1	5.6	6.2	7.1	8.3	9.4	9.1	8.8	7.5	8.4	6.7	6.1	6.6	7	6.8	7.4	9.6	7.6	8.9	8.7
15	20.3	29.7	22.9	24	22.1	28.1	22.2	24	26.9	17.7	19.6	22.2	30.2	22.6	24.4	19	23.1	25.8	23.3	25.8	22.1	23.4	23.7
30	15.3	20.2	19.7	17.7	20.1	15.4	17.5	19.8	22.1	17.9	20.8	14	22.4	17.9	19.8	20.8	27.4	28.9	18.8	22.3	22.5	21.2	21
45	11.8	15	20.4	12.6	14.7	14.9	13.7	15.7	17.8	13.2	17.4	11.4	18.3	13.5	19.1	15.5	14.4	18.2	16.4	15.8	19.9	17.5	16.9
60	10.7	11.5	16.1	11.2	12.7	10.7	12.5	13.8	14.4	12.8	15.2	9.4	16.6	13.4	13.5	13.2	16.8	11.2	10.6	14.9	15.7	13.6	17.8
90	8.6	9.5	10.1	7.9	9.1	8.6	10.2	11.6	9.8	11	10.7	7.7	11.5	9.1	9.4	9.8	15.2	7.2	8.2	11.5	9.3	12.3	10.7
120	8.3	8.5	9.2	7.8	8.4	7.9	9.3	9.4	9.6	9.3	11.6	5.7	10.4	9.3	9.3	7.8	11.2	6.8	6.3	8.9	9.8	9.6	9.8
Figure 4 - figure supplement 3C GTT AUC
control	hetero KO
1377	2001
1700	1574
1796	1721
1466	1587
1580	2028
1540	1715
1581	1512
1754	1844
1835	1804
1558	1817
1770	1858
1298
Figure 4 - figure supplement 3D			Figure 4 - figure supplement 3E
insulin humalog (mU/L)			glucose turnover rage (mg/kg/min)
control	AdHk2KO		control	AdHk2KO
18.2219	35.1337		28.0984	18.1143
27.3131	18.5562		22.2398	23.6505
30.9579	20.2513		21.4686	23.423
29.4048	14.6825		17.9619	27.8646
19.418	13.1085		28.9367	28.9343
26.5304	15.8201		18.2219	13.5393
	17.7921			58.2626
Figure 4 - figure supplement 3F
	glycolytic rate (mg/kg/min)
	control						AdHk2KO
basal	31.6652	132.287	101.58	13.6276	33.9166	26.9709	315.224	141.095	143.184	1563.32	1554.14	70.4775	284.087
clamp	136.33	127.99	116.822	42.2706	96.7601	65.8856	89.9465	129.982	99.8182	134.638	281.937	50.3614	296.217
