# Supplementary material for: Diet-induced loss of adipose hexokinase 2 correlates with hyperglycemia
Source: eLife journal article supplement (doi:10.7554/elife.85103), 2023-02-20
Supplement: fig4-figsupp4-data1 [file Figure 4 - figure supplement 4 - source data.xlsx]

## Sheet: Sheet1
Figure 4 - figure supplement 4A
	body weight (g)
weeks on HFD	control					AdHk2KO
0	21.7	19	16	14	19.7	20.3	18.5	18.4	16	20.2	20.9	19.5	18.2
1	22.9	21	18.9	17.2	21	22.1	21.7	20.6	17.8	22	21.4	20.5	20.1
2	23.9	21.6	20	17.7	21.7	23.4	22.9	21.5	19	23.2	22.5	22.1	21.7
3	25.2	23.8	21.1	20.4	22.4	24.6	24.1	22.7	21.2	25.2	23.8	23.2	22.9
4	25.8	25	21.5	21.9	22.6	24.8	24.2	23.1	21.9	25.4	24.6	23.6	23.1
5	27.8	27.9	22.5	22.2	24.1	27.3	25.9	24.1	22.6	27.1	26	25.5	24.8
6	27.9	27.9	22.9	22.2	24.8	27.6	25.8	24.2	22.9	27	26.9	25.5	24.2
7	28.3	28	23	22.4	25	27.6	26	24.4	23.2	27.2	26.7	26	24.6
8	29.5	28.4	23.6	23	25.8	27.8	26.5	24.9	23.6	27.9	27.2	27.3	25.2
9	30.5	28.8	24	22.9	26.3	28.1	26.8	25.4	23.9	28.3	27.8	27.6	24.8
10	31.7	30.1	25.1	25.5	27	28.8	29.6	26.7	24.4	28.9	29.1	28.9	25.6
Figure 4 - figure supplement 4B
fat mass (%)			lean mass (%)
control	AdHk2KO		control	AdHk2KO
21.7376	17.0386		69.9495	74.3761
18.5752	21.6498		73.0654	69.9899
17.4033	17.2884		73.7974	73.8427
12.0059	16.9287		79.49	75.2907
20.4453	26.9948		72.0928	63.4454
	21.0447			70.6976
	20.0935			71.6661
	14.6458			77.3503
Figure 4 - figure supplement 4C
	orgam weight (%body weight)
	control					AdHk2KO
vWAT	4.06841	3.81869	2.77443	3.14615	3.75125	3.66537	3.42121	3.43473	3.42871	4.33705	4.09043	3.20861	4.8116
sWAT	1.78464	2.19564	2.03092	1.84615	1.76523	1.29773	1.84242	2.1229	1.73065	2.08852	1.89835	1.70187	2.06552
liver	4.94696	3.90374	4.30649	4.32192	4.15484	4.76084	4.63939	4.77634	4.66645	4.62295	4.5033	4.14494	4.73417
pancreas	1.08696	1.19439	1.18282	1.03615	1.11935	1.1233	1.09697	1.36031	1.14871	1.00951	1.02541	1.10861	1.20815
kidney	1.18986	1.41153	1.00802	1.25038	1.16129	missing value	1.25859	1.22634	1.10419	1.1541	1.24719	1.11985	1.2
heart	0.436812	0.521184	0.404962	0.457692	0.393907	0.432686	0.413131	0.431679	0.462903	0.396721	0.431683	0.453558	0.375549
spleen	0.365217	0.41433	0.36145	0.362692	0.281362	0.361812	0.317508	0.314885	0.300968	0.291475	0.307921	0.316479	0.305016
BAT	0.250145	0.277882	0.262595	0.247692	0.262007	0.265372	0.334343	0.31374	0.35129	0.348197	0.322112	0.229213	0.352351
Figure 4 - figure supplement 4D
	blood glucose (mM)
time (min)	control					AdHk2KO
0	11	10	9.5	10.3	10.9	10.6	11.7	8.6	10.8	12.5	12.6	12.9	11
10	12.2	11.2	13.2	12.3	11	11.4	12	10.3	10.5	11.7	13.1	12.3	12.7
20	7	6.1	8.7	8.7	7.9	6.2	8.1	6	6	8.8	8.2	8.5	7.9
30	6.4	6.8	5.9	5.5	7	5.2	6.4	6	4.8	7	6.4	7.7	6
45	5.4	6	5.5	5.6	6.3	5.3	5.6	5	3.9	6.6	6	7.5	4.9
60	5.7	6.8	5.3	4.9	6.3	3.9	4.7	4.2	4.1	7	5.5	6.5	4.9
90	6.2	6.7	5.4	4.8	6.9	3.7	5.4	4.4	3.7	6.8	5.6	6.4	5.6
