# Supplementary material for: Diet-induced loss of adipose hexokinase 2 correlates with hyperglycemia
Source: eLife journal article supplement (doi:10.7554/elife.85103), 2023-02-20
Supplement: fig5-data1 [file Figure 5 - source data.xlsx]

## Sheet: Sheet1
Figure 5A
	glucose uptake (ug/min/mg tissue)
tissue	control					AdHk2KO
WAT	0.00683095	0.0330835	0.011609	0.0284303	0.00633533	0.0102539	0	0.00266972	0.00625131	0.00225282
BAT	0.211645	0.250435	0.0674228	0.181038	0.134718	0.0190689	0.0163645	0.00849206	0.00859597	0.017792
muscle	0.0249125	0.0198292	0.0269902	0.0227442	0.0243281	0.0290875	0.0148587	0.0236692	0.015555	0.0136811
Figure 5B
	glucose production (mg/kg/min)
	control						AdHk2KO
basal	21.5213	40.2177	24.3964	14.0202	21.1362	21.3622	41.7193	17.773	45.9835	101.636	80.9964	23.9809	59.2366
clamp	7.90748	7.75991	8.21772	4.71106	1.15891	10.9935	18.1143	23.6505	23.423	27.8646	28.9343	13.5393	58.2626
Figure 5C
	blood glucose (mM)
time	control					AdHk2KO
0	3.7	4.5	5	4.3	5.4	4	4.9	5.6	4.8	4.7	4.9
15	7.5	9.7	9.5	9	10.9	9.8	10.3	13.3	8.9	8.8	9.7
30	11.6	11.2	11.5	12.9	12.3	11	11.6	17.9	10.8	11.6	12.3
45	12.1	11.4	12	13.9	12.6	14.6	17.9	22.6	11.3	12.5	14.7
60	12.3	12.1	11.9	17.7	12.2	19.2	17.1	26.9	12.5	13.5	15.5
90	9.3	9.2	10.3	12.8	11.5	17.3	14.7	19.9	11.7	11.3	10.5
120	5.6	7.6	8	9.3	7.4	11.9	13.2	11.5	9.5	9.3	8.2
Figure 5D left
	mRNA (A.U.)
mRNA	control									AdHk2KO
G6pc	0.531178	0.839305	0.766983	1.86253	0.877804	1.53898	0.708073	1.2414	0.633744	1.30791	1.88853	2.02408	0.597606	1.30791	1.83016	3.25345	1.81752	2.51746	2.26887	1.31218	2.41491
Pepck	0.638333	0.321387	1.03698	2.0033	1.25385	1.03266	0.437201	1.16181	1.11448	0.45137	2.2853	5.21397	1.02981	3.97893	3.08735	3.47345	5.2284	1.53301	2.72521	0.375366	1.76097
Figure 5D right
	mRNA (A.U.)
mRNA	control									AdHk2KO
Serbp1c	1.36026	0.504835	0.935548	0.268666	0.948608	0.935548	1.68633	0.797681	1.56253	2.28768	1.08214	0.808816	0.786699	0.849028	2.55599	2.5208	1.81993	1.00967	1.09724	1.8711	2.66453
total	0.629151	0.486826	0.921131	0.578937	1.20704	1.50679	1.21544	1.02917	1.42551	1.31174	1.26705	1.57078	0.883608	1.17404	2.22141	2.49922	2.55174	1.31174	1.68352	1.28474	1.79189
alpha	0.724899	0.272788	0.936825	0.4917	1.41015	1.35271	1.07613	0.874089	1.86071	1.02516	0.997129	1.50092	0.671683	1.16139	2.19748	2.3552	2.22816	1.50092	1.63111	1.00406	1.79733
beta	0.384002	0.389362	0.590163	0.496266	1.43315	1.70431	1.04912	1.21351	1.74012	2.4609	1.09368	0.992532	1.2563	2.51261	3.88842	3.62803	2.39361	2.12754	2.01277	1.66923	2.92652
Acly	1.27336	0.650058	1.10087	0.517145	0.711355	1.16364	1.14762	1.10852	1.32743	2.45997	3.02858	1.39343	1.78836	1.81333	2.27938	2.65487	1.34597	1.13182	0.762411	1.82594	2.82576
Scd1	0.904634	0.549201	0.771323	0.685585	1.4798	0.855836	0.78753	1.05366	1.91243	1.8861	2.40395	1.33367	1.56418	1.04638	2.83905	3.56872	2.66735	1.60815	1.24436	1.87307	1.89922
Fasn	0.828765	1.23888	1.34633	0.586025	0.876457	1.41397	0.986066	0.75773	0.965773	4.56	2.65559	1.62342	2.42676	3.07169	2.98919	2.24974	1.74081	0.817764	0.742136	1.34701	3.45756
Acc	0.905531	0.804874	1.32577	0.96382	0.756078	1.00459	1.162	1.10696	0.97037	2.68856	1.9011	1.49157	2.1094	2.59698	1.63196	1.66625	1.60949	1.04002	0.827372	0.766633	1.76126
Figure 5E			Figure 5F			Figure 5G
incorporation of 3H-H2O into TG (A.U.)			plasma TG (mM)				plasma cholesterol (mM)
control	AdHk2KO		control	AdHk2KO			control								AdHk2KO
1.24458	1.42148		1.52	1.54		total	3.2	2.57	3.03	2.68	2.24	3.03	3.45	3.21	3.14	3	3.74	3.42	3.76	3.22	3.83	3.97	3.84	3.94
1.09928	1.70578		1.27	1.97		LDL	0.42	0.27	0.5	0.36	0.33	0.41	0.58	0.52	0.44	0.38	0.62	0.52	0.72	0.52	0.6	0.78	0.63	0.66
0.777076	1.12455		1.05	1.16		HDL	2.82	2.37	2.72	2.48	1.93	2.76	3.03	2.82	2.71	2.59	3.27	3.01	3.26	2.85	3.21	3.28	3.37	3.43
1.20036	1.1435		0.85	1.42
0.871841	1.89531		1.19	1.26
1.05505			1.23	1.08
0.751805			1.25	2.17
			1.42	1.61
				1.4
				1.62
