# Supplementary material for: Diet-induced loss of adipose hexokinase 2 correlates with hyperglycemia
Source: eLife journal article supplement (doi:10.7554/elife.85103), 2023-02-20
Supplement: fig7-data1 [file Figure 7 - source data.xlsx]

## Sheet: Sheet1
Figure 7A
	Hk2 mRNA (A.U.)
	ND										4w HFD
sWAT	2.27185	1.08965	0.87896	0.754645	0.533615	1.25071	1.73237	0.500952	0.713381	0.802595	0.0631038	0.216715	0.477598	0.225918	0.0815523	0.457786	0.323703	0.552001	0.374424	0.497491
vWAT	1.34709	0.876512	1.16461	0.747345	0.864445	1.30353	0.72821	0.865993	1.1995	0.902768	0.664272	0.901154	1.13276	0.7737	0.913734	1.38744	0.854071	1.28559	0.583347	1.04422
BAT	0.848536	0.629836	1.14318	1.37845	0.991203	1.53395	0.658499	0.816346			1.47739	0.831074	0.738694	0.802764	0.552118	0.918437	0.998098	1.26335	1.28098	0.977557
Figure 7B
	AHA incorporation (A.U.)
	ND				HFD
HK2	1.18662	1.16655	0.898998	0.74783	0.392052	0.444378	0.449174	0.277753
FASN	1.39061	1.06492	0.980152	0.564319	0.222619	0.312517	0.270409	0.181278
ACC	1.53345	1.08488	0.834453	0.54721	0.222377	0.305181	0.287164	0.162484
CALX	0.992315	0.851873	0.973104	1.18271	1.04061	0.569405	0.652941	0.798524
Figure 7C
	mRNA (A.U.)
	ND										4w HFD
Foxk1	1.19089	1.39671	0.980803	1.22437	0.93435	0.840807	1.3754	0.789958	1.028	0.965834	0.042749	0.245201	0.836267	0.497247	0.0600387	1.10179	0.876513	1.05691	0.450578	0.858474
Foxk2	1.18725	1.2992	0.977811	1.04075	0.937979	0.88719	1.48176	0.777716	0.868932	0.984399	0.0562356	0.241087	0.767175	0.597755	0.0144541	0.88719	0.538611	0.918477	0.531196	0.577269
Figure 7D
	mRNA (A.U.)
	ND										4w HFD
Foxk1	1.19614	1.97026	0.453253	0.3318	1.04854	0.930111	0.501901	1.12154	1.20203	1.24442	0.212921	1.07058	0.951574	0.794648	0.931991	1.20203	0.734826	1.21881	0.186271	0.804116
Foxk2	1.36719	1.51699	0.717581	0.444796	0.95344	0.986182	0.692519	1.09424	1.13283	1.09424	0.353851	1.17382	1.08765	0.960072	1.1105	1.65855	1.10951	1.40437	0.392272	1.125
Figure 7E
	mRNA (A.U.)
	ND										4w HFD
Foxk1	0.74433	0.359488	1.46816	1.42802	1.0302	1.15103	0.915687	0.903081			1.62903	1.54116	1.12819	1.07476	0.910048	1.15904	1.11956	1.33138	1.51879	0.97463
Foxk2	0.671307	0.760513	1.32413	1.24405	1.03445	1.28242	0.925862	0.757264			1.08301	0.96932	0.809467	0.885795	0.923411	1.02731	0.999216	1.34618	1.34618	1.10104
