# Supplementary material for: Diet-induced loss of adipose hexokinase 2 correlates with hyperglycemia
Source: eLife journal article supplement (doi:10.7554/elife.85103), 2023-02-20
Supplement: fig7-figsupp1-data1 [file Figure 7 - figure supplement 1 - source data.xlsx]

## Sheet: Sheet1
Figure 7 - figure supplement 1A
ribosomal proteins	ETC	OXPHOS	fatty acid synthesis	glycolysis	fatty acid oxidation	glycogen metabolism
7.79674	4.92304	4.44764	1.90777	1.42728	1.42728	1.42728
Figure 7 - figure supplement 1B ribosomal proteins				Figure 7 - figure supplement 1B_ETC&OXPHOS
	AHA Log2(HFD/ND)	RNA Log2(HFD/ND)			AHA Log2(HFD/ND)	RNA Log2(HFD/ND)
Rpl10a	-0.257597	-0.0093024		Atp5pd	-0.526577	n.d.
Rpl17	-0.6908	-0.0958221		Atp5f1e	-0.413523	n.d.
Rpl22	-0.327143	-0.006508		Ndufs1	-0.306202	-0.288077
Rpl23	-0.736348	-0.166468		Ndufs2	-0.909629	-0.177846
Rpl27	-0.972989	-0.0725701		Ndufs4	-2.11695	-0.324783
Rpl27a	-1.16402	0.0779124		Ndufs8	-1.03472	-0.156296
Rpl28	-0.531792	0.0231003		Ndufv1	-1.32376	-0.0113564
Rpl34	-0.532603	-0.0010766		Ndufa5	-3.00465	-0.341589
Rpl35	-1.87458	-0.0190825		Ndufb5	-2.15385	-0.239687
Rpl35a	-1.22775	-0.08133		Ndufa4	-0.620116	-0.228542
Rpl38	-0.738637	-0.0744503		Slc25a4	-0.975692	-0.0999041
Rplp0	-0.339441	-0.0802992		Slc25a5	-0.7476	-0.281077
Rps18	-0.655331	-0.0847395		Uqcrq	-0.582847	-0.248586
Rps20	-0.498712	0.0076265		Ndufa13	-0.871432	-0.107194
Rps28	-0.485261	-0.116086		Cyb5r1	-1.39519	0.182988
Rps3	-0.675652	-0.0173433
Rps7	-0.620618	-0.101179
Figure 7 - figure supplement 1C_FA synthesis				Figure 7 - figure supplement 1D_glycolysis
	AHA Log2(HFD/ND)	RNA Log2(HFD/ND)			AHA Log2(HFD/ND)	RNA Log2(HFD/ND)
Acly	-2.02718	-1.32939		Hk2	-1.29483	0.0126788
Acaca	-1.91271	-1.41213		Ldha	-0.666134	-0.461155
Acss2	-1.68304	-0.781084		Ldhb	-0.21504	-0.169227
Echdc1	-0.843776	-0.361552		Mpc1	-0.478076	-0.386539
Fasn	-2.05798	-1.61491		Mpc2	-1.31397	-0.345636
				Pdha1	-0.826815	-0.45269
