# Supplementary material for: Diet-induced loss of adipose hexokinase 2 correlates with hyperglycemia
Source: eLife. 2023 Mar 15;12:e85103. doi: 10.7554/eLife.85103 (PMC10017106; doi:10.7554/eLife.85103)
Supplement: Figure 1—figure supplement 1—source data 1. [file elife-85103-fig1-figsupp1-data1.zip]

Archive with 26 entries (23 files):
- Figure 1 - figure supplement 1 - source data/
- __MACOSX/._Figure 1 - figure supplement 1 - source data
- Figure 1 - figure supplement 1 - source data/Figure 1 - figure supplement 1 - source data.xlsx
- __MACOSX/Figure 1 - figure supplement 1 - source data/._Figure 1 - figure supplement 1 - source data.xlsx
- Figure 1 - figure supplement 1 - source data/Figure 1 - figure supplement 1A.pdf
- __MACOSX/Figure 1 - figure supplement 1 - source data/._Figure 1 - figure supplement 1A.pdf
- Figure 1 - figure supplement 1 - source data/.DS_Store
- __MACOSX/Figure 1 - figure supplement 1 - source data/._.DS_Store
- Figure 1 - figure supplement 1 - source data/Figure 1 - figure supplement 1F.pdf
- __MACOSX/Figure 1 - figure supplement 1 - source data/._Figure 1 - figure supplement 1F.pdf
- Figure 1 - figure supplement 1 - source data/source data Figure 1 - figure supplement 1F/
- __MACOSX/Figure 1 - figure supplement 1 - source data/._source data Figure 1 - figure supplement 1F
- Figure 1 - figure supplement 1 - source data/source data Figure 1 - figure supplement 1A/
- __MACOSX/Figure 1 - figure supplement 1 - source data/._source data Figure 1 - figure supplement 1A
- Figure 1 - figure supplement 1 - source data/source data Figure 1 - figure supplement 1F/.DS_Store
- __MACOSX/Figure 1 - figure supplement 1 - source data/source data Figure 1 - figure supplement 1F/._.DS_Store
- Figure 1 - figure supplement 1 - source data/source data Figure 1 - figure supplement 1F/eWAT_sWAT_HK2.tif
- __MACOSX/Figure 1 - figure supplement 1 - source data/source data Figure 1 - figure supplement 1F/._eWAT_sWAT_HK2.tif
- Figure 1 - figure supplement 1 - source data/source data Figure 1 - figure supplement 1F/eWAT_sWAT_HK2_CALX.tif
- __MACOSX/Figure 1 - figure supplement 1 - source data/source data Figure 1 - figure supplement 1F/._eWAT_sWAT_HK2_CALX.tif
- Figure 1 - figure supplement 1 - source data/source data Figure 1 - figure supplement 1A/.DS_Store
- __MACOSX/Figure 1 - figure supplement 1 - source data/source data Figure 1 - figure supplement 1A/._.DS_Store
- Figure 1 - figure supplement 1 - source data/source data Figure 1 - figure supplement 1A/FASN_CALX_pS473_pPRAS40_ACC_pT308_PRAS40.tif
- __MACOSX/Figure 1 - figure supplement 1 - source data/source data Figure 1 - figure supplement 1A/._FASN_CALX_pS473_pPRAS40_ACC_pT308_PRAS40.tif
- Figure 1 - figure supplement 1 - source data/source data Figure 1 - figure supplement 1A/AKT.tif
- __MACOSX/Figure 1 - figure supplement 1 - source data/source data Figure 1 - figure supplement 1A/._AKT.tif
