# Supplementary material for: Diet-induced loss of adipose hexokinase 2 correlates with hyperglycemia
Source: eLife. 2023 Mar 15;12:e85103. doi: 10.7554/eLife.85103 (PMC10017106; doi:10.7554/eLife.85103)
Supplement: Supplementary file 1. [file elife-85103-supp1.xlsx]

## Sheet: a. total proteome in vWAT
Uniprot ID	gene name	description	ND_1	ND_2	ND_3	ND_4	ND_5	HFD_1	HFD_2	HFD_3	HFD_4	HFD_5	Log2 (HFD/ND)	qValue
A1L314	Mpeg1	Macrophage-expressed gene 1 protein OS=Mus musculus GN=Mpeg1 PE=2 SV=1	231271	164231	245778	199707	167224	201197	190882	166436	201832	170540	-0.14195	0.578575
A2A432	Cul4b	Cullin-4B OS=Mus musculus GN=Cul4b PE=1 SV=1	2.3928e+06	2.19789e+06	2.17149e+06	2.17723e+06	1.87911e+06	2.26651e+06	2.51528e+06	2.2437e+06	2.34229e+06	2.13587e+06	0.0740629	0.374015
A2A5R2	Arfgef2	Brefeldin A-inhibited guanine nucleotide-exchange protein 2 OS=Mus musculus GN=Arfgef2 PE=1 SV=1	4.11464e+06	4.15757e+06	4.18467e+06	4.32622e+06	4.1018e+06	4.09659e+06	4.25587e+06	4.0694e+06	4.1345e+06	4.06263e+06	-0.0283701	0.753754
A2A690-2	Tanc2	Isoform 2 of Protein TANC2 OS=Mus musculus GN=Tanc2	292218	293979	304722	281181	326354	292782	341548	297672	307490	300876	0.0542674	0.654076
A2A6A1	Gpatch8	G patch domain-containing protein 8 OS=Mus musculus GN=Gpatch8 PE=1 SV=1	145645	123826	137189	94888.6	134262	122691	122367	134311	129741	135972	-0.0964261	0.83601
A2A6Q5-3	Cdc27	Isoform 2 of Cell division cycle protein 27 homolog OS=Mus musculus GN=Cdc27	123008	123883	145928	89989.1	126094	97827.6	117491	125133	139980	101104	-0.11946	0.771083
A2A6T1	Cdr2l	Cerebellar degeneration-related protein 2-like OS=Mus musculus GN=Cdr2l PE=2 SV=1	256126	234581	275516	221418	264098	271157	262255	276111	267663	271580	0.129465	0.224707
A2A863-2	Itgb4	Isoform 2 of Integrin beta-4 OS=Mus musculus GN=Itgb4	1.04138e+06	950155	1.08895e+06	974403	983371	821099	890523	877265	947082	941189	-0.25045	0.0653325
A2A8L5	Ptprf	Receptor-type tyrosine-protein phosphatase F OS=Mus musculus GN=Ptprf PE=1 SV=1	936051	1.00602e+06	1.02797e+06	1.11073e+06	1.07879e+06	928569	860909	915707	943081	913051	-0.268857	0.0521566
A2A8U2	Tmem201	Isoform 3 of Transmembrane protein 201 OS=Mus musculus GN=Tmem201	434609	271164	312503	210190	241270	194278	210756	245455	352516	224364	-0.469102	0.422009
A2A8Z1	Osbpl9	Oxysterol-binding protein-related protein 9 OS=Mus musculus GN=Osbpl9 PE=1 SV=1	4.36411e+06	4.34597e+06	4.03961e+06	3.97163e+06	4.16385e+06	4.89545e+06	5.06799e+06	4.53936e+06	4.70605e+06	4.77012e+06	0.293811	0.0223952
A2A9C3	Szt2	Isoform 2 of Protein SZT2 OS=Mus musculus GN=Szt2	204481	194997	197273	197977	194765	177782	205379	195249	203492	198895	0.0171736	0.854484
A2A9T0	Tbkbp1	Isoform 2 of TANK-binding kinase 1-binding protein 1 OS=Mus musculus GN=Tbkbp1	60317.8	41053.2	49580.8	35875.6	50830.8	50263.1	50511.1	43805.3	55337.8	56325.2	0.0448759	0.519009
A2AAY5	Sh3pxd2b	SH3 and PX domain-containing protein 2B OS=Mus musculus GN=Sh3pxd2b PE=1 SV=1	987345	1.10915e+06	1.28902e+06	1.23025e+06	1.22422e+06	993846	1.01058e+06	1.0636e+06	1.06876e+06	1.00016e+06	-0.44297	0.109178
A2AB59	Arhgap27	Rho GTPase-activating protein 27 OS=Mus musculus GN=Arhgap27 PE=1 SV=1	305693	242011	270467	172754	299656	271462	297755	282453	298595	291652	0.169686	0.355375
A2ABV5	Med14	Mediator of RNA polymerase II transcription subunit 14 OS=Mus musculus GN=Med14 PE=1 SV=1	252506	257611	282211	279013	280020	243071	276727	250782	244646	248447	-0.280475	0.229925
A2ADA5-2	Pusl1	Isoform 2 of tRNA pseudouridine synthase-like 1 OS=Mus musculus GN=Pusl1	121789	123886	178797	144933	175261	98475.8	90536.2	131333	120123	111110	-0.679939	0.0603938
A2ADY9	Ddi2	Protein DDI1 homolog 2 OS=Mus musculus GN=Ddi2 PE=1 SV=1	4.21716e+06	4.13076e+06	3.93449e+06	4.3277e+06	3.53405e+06	4.00762e+06	3.98055e+06	3.70205e+06	3.83603e+06	3.9507e+06	-0.100088	0.609486
A2AF47	Dock11	Dedicator of cytokinesis protein 11 OS=Mus musculus GN=Dock11 PE=1 SV=1	4.24625e+06	4.50923e+06	4.38258e+06	5.01196e+06	4.49105e+06	5.26625e+06	5.50107e+06	4.83108e+06	4.76957e+06	5.4975e+06	0.360827	0.0617638
A2AGH6-2	Med12	Isoform 2 of Mediator of RNA polymerase II transcription subunit 12 OS=Mus musculus GN=Med12	379145	393038	415371	405027	424483	410568	404189	429560	439233	405297	0.00438854	0.4674
A2AGT5	Ckap5	Isoform 3 of Cytoskeleton-associated protein 5 OS=Mus musculus GN=Ckap5	4.03226e+06	4.11665e+06	3.83951e+06	4.21522e+06	4.01868e+06	4.64269e+06	4.60248e+06	4.08502e+06	4.09275e+06	4.28447e+06	0.131075	0.201289
A2AH22	Ambra1	Isoform 6 of Activating molecule in BECN1-regulated autophagy protein 1 OS=Mus musculus GN=Ambra1	44584	48245.1	41953.5	43042.8	45091.2	37690.6	51719.6	43777.2	43309.9	40043.4	-0.078205	0.695705
A2AIG8	Accs	Isoform 2 of 1-aminocyclopropane-1-carboxylate synthase-like protein 1 OS=Mus musculus GN=Accs	1.91782e+06	1.82663e+06	1.57295e+06	1.90098e+06	1.49202e+06	1.89539e+06	1.66759e+06	1.70799e+06	1.59646e+06	1.80137e+06	-0.161358	0.989634
A2AJ15	Man1b1	"Endoplasmic reticulum mannosyl-oligosaccharide 1,2-alpha-mannosidase OS=Mus musculus GN=Man1b1 PE=2 SV=1"	34763.4	36495.5	41052.5	36872.7	39062.2	31898.4	40132.5	35418.4	33613.1	33849	-0.246833	0.297184
A2AJ76	Hmcn2	Hemicentin-2 OS=Mus musculus GN=Hmcn2 PE=2 SV=1	138314	153337	143459	161819	165283	138211	147508	149066	140613	148920	-0.0888942	0.411444
A2AJ88	Pnpla7	Isoform 2 of Patatin-like phospholipase domain-containing protein 7 OS=Mus musculus GN=Pnpla7	753313	676720	752304	655981	742317	743723	718247	723934	744513	752669	-0.015814	0.57836
A2AJB7	Lcn5	Isoform 2 of Epididymal-specific lipocalin-5 OS=Mus musculus GN=Lcn5	111046	107924	111788	359944	147001	122527	162934	96693.1	114517	107302	0.0462748	0.495217
A2AJI0	Map7d1	Isoform 2 of MAP7 domain-containing protein 1 OS=Mus musculus GN=Map7d1	1.36242e+06	1.16082e+06	1.31432e+06	1.18668e+06	1.64205e+06	1.42909e+06	1.36081e+06	1.5982e+06	1.50752e+06	1.53644e+06	0.287983	0.228911
A2AJL3	Fggy	FGGY carbohydrate kinase domain-containing protein OS=Mus musculus GN=Fggy PE=2 SV=1	5.32301e+06	4.54628e+06	5.74555e+06	5.09561e+06	5.00121e+06	4.44985e+06	5.03233e+06	4.76985e+06	5.2965e+06	4.99092e+06	-0.0830605	0.529094
A2AKG8	Focad	Focadhesin OS=Mus musculus GN=Focad PE=2 SV=1	1.4159e+06	1.43919e+06	1.51818e+06	1.29846e+06	1.58849e+06	1.52961e+06	1.61193e+06	1.56258e+06	1.51436e+06	1.53679e+06	0.152932	0.242787
A2ALW5	Dnajc25	DnaJ homolog subfamily C member 25 OS=Mus musculus GN=Dnajc25 PE=2 SV=1	447351	461170	505642	521275	497185	390234	407349	452647	427884	406264	-0.472138	0.0334223
A2AN08-5	Ubr4	Isoform 3 of E3 ubiquitin-protein ligase UBR4 OS=Mus musculus GN=Ubr4	1.07747e+07	1.03727e+07	1.11227e+07	7.74939e+06	1.09718e+07	1.10025e+07	1.13468e+07	1.07754e+07	1.09307e+07	10816693	0.0183207	0.390852
A2APT9	Klhdc7a	Kelch domain-containing protein 7A OS=Mus musculus GN=Klhdc7a PE=1 SV=3	3.28586e+06	2.89475e+06	3.17549e+06	2.69095e+06	3.67421e+06	3.35387e+06	3.09231e+06	3.47628e+06	3.08503e+06	3.11834e+06	-0.0445894	0.734323
A2APV2-2	Fmnl2	Isoform 2 of Formin-like protein 2 OS=Mus musculus GN=Fmnl2	616880	437397	513912	499337	428615	423602	535207	493193	444516	426009	-0.310843	0.539705
A2AQ07	Tubb1	Tubulin beta-1 chain OS=Mus musculus GN=Tubb1 PE=1 SV=1	861857	869250	921979	733561	963967	844554	824218	884344	785010	904985	-0.0636743	0.788567
A2AQ19	Rtf1	RNA polymerase-associated protein RTF1 homolog OS=Mus musculus GN=Rtf1 PE=1 SV=1	307293	284803	298890	232992	272569	338060	334260	330874	312689	306354	0.326448	0.0674224
A2AQ25	Skt	Sickle tail protein OS=Mus musculus GN=Skt PE=1 SV=1	2.6553e+06	2.14444e+06	2.73875e+06	2.44485e+06	2.38905e+06	2.44305e+06	2.4042e+06	2.09639e+06	2.49292e+06	2.27628e+06	-0.0732298	0.492889
A2AR02	Ppig	Peptidyl-prolyl cis-trans isomerase G OS=Mus musculus GN=Ppig PE=2 SV=1	908091	898690	818477	729895	773890	610947	774696	621962	760567	640310	-0.57999	0.060949
A2ARP1-3	Ppip5k1	Isoform 3 of Inositol hexakisphosphate and diphosphoinositol-pentakisphosphate kinase 1 OS=Mus musculus GN=Ppip5k1	440571	379567	438211	309787	474216	444577	506557	483428	493831	509580	0.244624	0.104042
A2ARV4	Lrp2	Low-density lipoprotein receptor-related protein 2 OS=Mus musculus GN=Lrp2 PE=1 SV=1	1.54219e+07	7.44835e+06	1.53358e+07	7.66204e+06	5.60728e+06	5.6446e+06	1.02272e+07	4.46256e+06	1.16695e+07	4.61007e+06	-0.895381	0.36734
A2ASQ1	Agrn	Agrin OS=Mus musculus GN=Agrn PE=1 SV=1	1.11897e+06	996759	1.03925e+06	843381	1.13097e+06	943532	1.09015e+06	875161	1.05009e+06	956839	-0.190581	0.672999
A2ASZ8-5	Slc25a25	Isoform 4 of Calcium-binding mitochondrial carrier protein SCaMC-2 OS=Mus musculus GN=Slc25a25	209941	197573	213570	167831	211039	230197	217114	199559	214411	222390	0.0773143	0.265779
A2ATU0	Dhtkd1	"Probable 2-oxoglutarate dehydrogenase E1 component DHKTD1, mitochondrial OS=Mus musculus GN=Dhtkd1 PE=1 SV=1"	1.5084e+06	1.17817e+06	1.19966e+06	1.31018e+06	1.17718e+06	1.22007e+06	1.23965e+06	1.16268e+06	1.2245e+06	1.16682e+06	0.0328813	0.459575
A2AVA0	Svep1	"Sushi, von Willebrand factor type A, EGF and pentraxin domain-containing protein 1 OS=Mus musculus GN=Svep1 PE=1 SV=1"	683349	663455	822438	797187	760935	592574	589049	654495	676990	641873	-0.393325	0.050728
A2AVZ9	Slc43a3	Solute carrier family 43 member 3 OS=Mus musculus GN=Slc43a3 PE=2 SV=1	509367	465344	463137	496664	479116	551612	453551	489171	526694	449866	0.0219806	0.770175
A2AWA9	Rabgap1	Rab GTPase-activating protein 1 OS=Mus musculus GN=Rabgap1 PE=1 SV=1	2.73558e+06	2.68247e+06	2.57896e+06	2.68384e+06	2.55259e+06	2.93102e+06	2.91478e+06	2.70436e+06	2.87329e+06	2.88199e+06	0.166136	0.0900529
A2BDX3	Mocs3	Adenylyltransferase and sulfurtransferase MOCS3 OS=Mus musculus GN=Mocs3 PE=2 SV=1	1.46753e+06	1.43192e+06	1.37537e+06	1.50112e+06	1.48515e+06	1.46272e+06	1.35536e+06	1.4219e+06	1.41468e+06	1.39158e+06	-0.0929586	0.491431
A2BH40-2	Arid1a	Isoform 2 of AT-rich interactive domain-containing protein 1A OS=Mus musculus GN=Arid1a	256664	200571	233557	227638	228984	217628	223843	223255	238820	198897	-0.0906739	0.600801
A2RSJ4	Uhrf1bp1l	UHRF1-binding protein 1-like OS=Mus musculus GN=Uhrf1bp1l PE=1 SV=2	1.65265e+06	1.54398e+06	2.25044e+06	1.44219e+06	2.47108e+06	1.18425e+06	1.18055e+06	1.43144e+06	1.46537e+06	1.26776e+06	-0.649882	0.0520912
A2RSQ0	Dennd5b	DENN domain-containing protein 5B OS=Mus musculus GN=Dennd5b PE=1 SV=2	423685	421885	407654	493126	432509	388984	363554	392195	380397	408934	-0.198893	0.0742863
A2RSX7	Tyw5	tRNA wybutosine-synthesizing protein 5 OS=Mus musculus GN=Tyw5 PE=2 SV=2	262502	325760	311197	363359	265558	287024	306116	282113	316117	296144	-0.11445	0.839193
A3KG59-2	Pm20d2	Isoform 2 of Peptidase M20 domain-containing protein 2 OS=Mus musculus GN=Pm20d2	112392	103919	115266	116583	123872	107307	105786	110991	119581	115268	-0.0969769	0.711792
A3KGB4	Tbc1d8b	TBC1 domain family member 8B OS=Mus musculus GN=Tbc1d8b PE=2 SV=1	1.39094e+06	1.39599e+06	1.34393e+06	1.53016e+06	1.20494e+06	1.46884e+06	1.56004e+06	1.36625e+06	1.56664e+06	1.39427e+06	0.122631	0.321272
A3KGS3	Ralgapa2	Ral GTPase-activating protein subunit alpha-2 OS=Mus musculus GN=Ralgapa2 PE=1 SV=2	2.73196e+06	2.79503e+06	2.94908e+06	3.0346e+06	2.78809e+06	2.46835e+06	2.56108e+06	2.63197e+06	2.66502e+06	2.59428e+06	-0.179021	0.0533249
A3KMP2	Ttc38	Tetratricopeptide repeat protein 38 OS=Mus musculus GN=Ttc38 PE=2 SV=2	1.69603e+07	1.62291e+07	1.71918e+07	1.85311e+07	1.7569e+07	1.62769e+07	1.57341e+07	1.68185e+07	1.62108e+07	1.69163e+07	-0.124095	0.268973
A6H584	Col6a5	Collagen alpha-5(VI) chain OS=Mus musculus GN=Col6a5 PE=1 SV=3	7.07839e+07	6.48019e+07	7.62547e+07	6.04317e+07	3.83264e+07	4.56837e+07	3.57779e+07	4.43285e+07	4.70712e+07	3.23038e+07	-0.848787	0.0573791
A6H5Y3	Mtr	Methionine synthase OS=Mus musculus GN=Mtr PE=2 SV=1	2.77702e+06	2.61731e+06	2.65301e+06	2.82511e+06	2.57092e+06	2.67553e+06	2.57555e+06	2.50364e+06	2.57277e+06	2.64503e+06	-0.0715477	0.425427
A6H5Z3	Exoc6b	Exocyst complex component 6B OS=Mus musculus GN=Exoc6b PE=2 SV=1	692799	668287	730529	690890	642090	729607	691148	695913	687059	729812	-0.00380289	0.504922
A6H611	Mipep	Mitochondrial intermediate peptidase OS=Mus musculus GN=Mipep PE=2 SV=1	1.0219e+06	1.03167e+06	952496	1.07968e+06	1.00314e+06	1.01259e+06	946785	968618	960101	998985	-0.133423	0.391822
A6H630	NA	UPF0364 protein C6orf211 homolog OS=Mus musculus PE=2 SV=1	614403	564382	525381	680444	547382	502798	477528	546779	575355	500878	-0.271543	0.165268
A6H6A9-3	Rabgap1l	Isoform 3 of Rab GTPase-activating protein 1-like OS=Mus musculus GN=Rabgap1l	85996	102094	101950	101860	100391	62365	90063.1	82499.8	78552.3	79245.6	-0.575232	0.0402235
A6H6A9	Rabgap1l	Rab GTPase-activating protein 1-like OS=Mus musculus GN=Rabgap1l PE=1 SV=1	552862	601309	617426	523093	677049	614174	594781	587957	560891	600608	-0.0230723	0.9903
A6H6E2	Mmrn2	Multimerin-2 OS=Mus musculus GN=Mmrn2 PE=2 SV=1	1.10899e+06	1.11056e+06	1.10348e+06	1.21722e+06	1.08995e+06	1.08761e+06	1.25114e+06	1.0313e+06	1.12583e+06	1.04231e+06	-0.0465717	0.788071
A6H8H2	Dennd4c	Isoform 2 of DENN domain-containing protein 4C OS=Mus musculus GN=Dennd4c	2.96505e+06	2.73584e+06	2.88793e+06	2.57306e+06	2.92711e+06	2.717e+06	2.62695e+06	2.72789e+06	2.99054e+06	2.8141e+06	-0.136854	0.807873
A6X8Z5	Arhgap31	Rho GTPase-activating protein 31 OS=Mus musculus GN=Arhgap31 PE=1 SV=1	351737	347772	359350	320656	391946	348579	349807	317423	309683	326124	-0.177002	0.273952
A6X919	Dpy19l1	Probable C-mannosyltransferase DPY19L1 OS=Mus musculus GN=Dpy19l1 PE=2 SV=1	333928	343032	358251	355542	325339	347170	347319	383619	339158	341393	0.0297084	0.645885
A6X935	Itih4	"Inter alpha-trypsin inhibitor, heavy chain 4 OS=Mus musculus GN=Itih4 PE=1 SV=2"	6.40307e+06	7.10483e+06	7.70669e+06	6.90736e+06	6.88262e+06	6.29017e+06	6.87125e+06	6.27205e+06	5.71633e+06	7.22753e+06	-0.27132	0.283874
A8C756	Thada	Thyroid adenoma-associated protein homolog OS=Mus musculus GN=Thada PE=2 SV=1	956980	756712	850773	709411	827284	718588	727185	780893	786561	750988	-0.231224	0.303147
B1AR13	Cisd3	"CDGSH iron-sulfur domain-containing protein 3, mitochondrial OS=Mus musculus GN=Cisd3 PE=1 SV=1"	458076	620122	521320	582967	631948	701336	741759	656244	592957	646339	0.240145	0.0951652
B1AUE5	Pex10	Peroxisome biogenesis factor 10 OS=Mus musculus GN=Pex10 PE=2 SV=1	672909	713398	641654	704141	692949	753361	791890	685648	713099	753280	0.177986	0.166802
B1AVH7	Tbc1d2	TBC1 domain family member 2A OS=Mus musculus GN=Tbc1d2 PE=2 SV=1	106791	81199.1	119638	93634.4	151136	77491	97163	104598	87048.6	92392	-0.336379	0.283932
B1AVY7	Kif16b	Kinesin-like protein KIF16B OS=Mus musculus GN=Kif16b PE=1 SV=1	573808	550618	565056	598433	577893	555735	555616	564089	564980	560376	-0.0563675	0.569355
B1AVZ0	Uprt	Uracil phosphoribosyltransferase homolog OS=Mus musculus GN=Uprt PE=2 SV=1	345182	352299	390034	344038	421381	338273	328174	360624	314474	315961	-0.170014	0.136453
B1AXP6	Tomm5	Isoform 2 of Mitochondrial import receptor subunit TOM5 homolog OS=Mus musculus GN=Tomm5	159151	160970	201795	160705	205788	128374	116697	153326	156645	143733	-0.303094	0.0551794
B1AY13	Usp24	Ubiquitin carboxyl-terminal hydrolase 24 OS=Mus musculus GN=Usp24 PE=1 SV=1	3.05513e+06	3.33816e+06	3.26822e+06	2.88964e+06	3.44556e+06	3.46805e+06	3.47042e+06	3.65904e+06	3.23601e+06	3.43112e+06	0.134973	0.200959
B1AZA5	Tmem245	Transmembrane protein 245 OS=Mus musculus GN=Tmem245 PE=1 SV=1	2.22721e+06	2.34133e+06	2.59371e+06	2.49762e+06	2.46686e+06	2.10234e+06	2.19876e+06	2.29596e+06	2.22043e+06	2.39159e+06	-0.251658	0.176952
B1AZI6	Thoc2	THO complex subunit 2 OS=Mus musculus GN=Thoc2 PE=1 SV=1	1.94133e+06	1.80293e+06	1.77657e+06	1.78196e+06	1.79571e+06	1.82338e+06	1.68538e+06	1.564e+06	1.65203e+06	1.66217e+06	-0.190674	0.129459
B1AZP2-3	Dlgap4	Isoform 3 of Disks large-associated protein 4 OS=Mus musculus GN=Dlgap4	897664	805838	695348	920733	789852	869716	963844	754018	856636	914767	0.180329	0.5066
B2RPV6	Mmrn1	Multimerin-1 OS=Mus musculus GN=Mmrn1 PE=2 SV=2	33642.1	30098.7	55469.2	30293.4	43381.6	33882.3	29540.8	36653	36753.4	35795.7	0.154003	0.614592
B2RQC6	Cad	CAD protein OS=Mus musculus GN=Cad PE=2 SV=1	4.63402e+06	4.29484e+06	4.66048e+06	3.46121e+06	4.20623e+06	4.56678e+06	4.28878e+06	4.49939e+06	4.44397e+06	4.33623e+06	0.0662908	0.569335
B2RQE8	Arhgap42	Rho GTPase-activating protein 42 OS=Mus musculus GN=Arhgap42 PE=1 SV=1	155178	130519	154352	122618	141914	135610	139902	129371	132127	142084	-0.113832	0.657877
B2RR83	Ythdc2	Probable ATP-dependent RNA helicase YTHDC2 OS=Mus musculus GN=Ythdc2 PE=1 SV=1	143307	142077	158220	129558	155327	141799	151174	138839	133806	149980	-0.0261896	0.815627
B2RRE7	Otud4	OTU domain-containing protein 4 OS=Mus musculus GN=Otud4 PE=1 SV=1	1.49148e+06	1.63191e+06	1.2524e+06	2.13629e+06	1.32814e+06	1.63927e+06	1.59019e+06	1.48572e+06	1.51889e+06	1.56689e+06	0.106523	0.932446
B2RRF6	Znf518a	Zinc finger protein 518A OS=Mus musculus GN=Znf518a PE=2 SV=1	38225.8	49853.8	38002.8	37605.8	25629.1	134949	68148	440245	216330	42714	4.24457	0.0480858
B2RS91	Rrn3	RNA polymerase I-specific transcription initiation factor RRN3 OS=Mus musculus GN=Rrn3 PE=1 SV=1	43399.7	41678.1	36223.8	35551.9	29138.9	46832.4	61353.9	45949.4	41701.8	44434.8	0.54993	0.0716823
B2RSH2	Gnai1	Guanine nucleotide-binding protein G(i) subunit alpha-1 OS=Mus musculus GN=Gnai1 PE=2 SV=1	4.21236e+06	3.57857e+06	3.37771e+06	4.54941e+06	3.94684e+06	3.48037e+06	4.27136e+06	4.63952e+06	4.47533e+06	4.47921e+06	0.249711	0.420924
B2RU80	Ptprb	Receptor-type tyrosine-protein phosphatase beta OS=Mus musculus GN=Ptprb PE=1 SV=1	112099	144522	140347	150433	171488	107212	107111	117713	121388	121383	-0.473775	0.0596412
B2RUP2-2	Unc13d	Isoform 2 of Protein unc-13 homolog D OS=Mus musculus GN=Unc13d	53524.4	47448.4	54523.3	54065	63125.9	49239.3	41556.2	51820.2	47264.3	54228.1	-0.235456	0.225716
B2RUR8	Otud7b	OTU domain-containing protein 7B OS=Mus musculus GN=Otud7b PE=1 SV=1	160729	179548	144723	251745	136883	115257	116944	134415	150223	139756	-0.423394	0.111652
B2RVY9	Tmem182	Transmembrane protein 182 OS=Mus musculus GN=Tmem182 PE=2 SV=1	875765	890557	723956	841026	903003	1.33961e+06	1.28504e+06	1.14259e+06	977082	1.52892e+06	0.873671	0.0135929
B2RWS6	Ep300	Histone acetyltransferase p300 OS=Mus musculus GN=Ep300 PE=1 SV=2	123313	122033	132983	131797	145891	93781.5	96213	106886	109570	110415	-0.493195	0.0123324
B2RX12-2	Abcc3	Isoform 2 of Canalicular multispecific organic anion transporter 2 OS=Mus musculus GN=Abcc3	2.0338e+06	1.80778e+06	2.00698e+06	2.02772e+06	1.78618e+06	1.78725e+06	1.96449e+06	1.81907e+06	1.944e+06	1.74836e+06	-0.22835	0.485281
B2RX14	Zcchc11	Terminal uridylyltransferase 4 OS=Mus musculus GN=Zcchc11 PE=1 SV=2	156082	155862	161253	164475	138422	126711	128147	139339	133699	131294	-0.399626	0.0212547
B2RXC1	Trappc11	Trafficking protein particle complex subunit 11 OS=Mus musculus GN=Trappc11 PE=2 SV=1	5.48548e+06	5.30696e+06	4.98779e+06	5.01061e+06	5.0863e+06	5.96088e+06	5.60325e+06	5.56649e+06	5.42945e+06	5.6487e+06	0.206387	0.0845867
B2RXR6	Ankrd44	Serine/threonine-protein phosphatase 6 regulatory ankyrin repeat subunit B OS=Mus musculus GN=Ankrd44 PE=2 SV=1	3.73011e+06	3.23689e+06	3.69282e+06	2.27825e+06	3.6999e+06	3.75228e+06	3.59082e+06	3.59682e+06	3.71256e+06	3.53308e+06	-0.0551493	0.411905
B2RXS4	Plxnb2	Plexin-B2 OS=Mus musculus GN=Plxnb2 PE=1 SV=1	2.47228e+06	2.4385e+06	2.50459e+06	2.82467e+06	2.43156e+06	2.27921e+06	2.35903e+06	2.26594e+06	2.30607e+06	2.33146e+06	-0.16636	0.0924026
B2RY04	Dock5	Dedicator of cytokinesis protein 5 OS=Mus musculus GN=Dock5 PE=1 SV=2	599266	662914	655165	684188	701868	661500	678275	684222	672978	637959	0.0241493	0.851409
B2RY50	Armc4	Armadillo repeat-containing protein 4 OS=Mus musculus GN=Armc4 PE=1 SV=1	199695	151284	164009	163404	145775	164612	174536	149782	163271	166032	0.0084704	0.981912
B2RY56	Rbm25	RNA-binding protein 25 OS=Mus musculus GN=Rbm25 PE=1 SV=2	2.43209e+06	1.94758e+06	2.12856e+06	2.02376e+06	1.92847e+06	2.14091e+06	2.05947e+06	1.95889e+06	2.09165e+06	2.06488e+06	0.0199398	0.888567
B5X0G2	Mup17	Major urinary protein 17 OS=Mus musculus GN=Mup17 PE=2 SV=2	1.20672e+06	993575	784595	1.21646e+06	696157	1.48739e+06	1.07541e+06	1.40856e+06	1.16939e+06	1.37035e+06	0.740583	0.0943369
B7ZMP1	Xpnpep3	Probable Xaa-Pro aminopeptidase 3 OS=Mus musculus GN=Xpnpep3 PE=2 SV=1	1.93337e+06	1.84595e+06	1.54103e+06	1.4944e+06	1.76207e+06	1.95592e+06	1.64937e+06	1.73761e+06	1.6554e+06	1.75106e+06	-0.0544084	0.799217
B8ZXI1	Qtrtd1	Queuine tRNA-ribosyltransferase subunit QTRTD1 OS=Mus musculus GN=Qtrtd1 PE=1 SV=2	97419.5	97272.6	160436	87482.6	100076	122465	89646.6	94187.3	87980.7	122369	-0.0964182	0.849678
B9EKI3	Tmf1	TATA element modulatory factor OS=Mus musculus GN=Tmf1 PE=1 SV=2	270610	208240	190362	101011	193064	292405	283835	223875	263079	237258	0.66695	0.140475
D0QMC3	Mndal	Myeloid cell nuclear differentiation antigen-like protein OS=Mus musculus GN=Mndal PE=1 SV=1	123218	88431.3	123220	95725	138278	112225	111550	101575	121225	114658	-0.20008	0.993248
D3YX43	Vsig10	V-set and immunoglobulin domain-containing protein 10 OS=Mus musculus GN=Vsig10 PE=3 SV=2	140047	139586	154046	163229	143023	122902	114637	135778	126996	128400	-0.286259	0.0332004
D3YXK2	Safb	Scaffold attachment factor B1 OS=Mus musculus GN=Safb PE=1 SV=2	777184	708991	841318	681031	828869	705055	777166	707449	848427	672127	-0.222853	0.698122
D3YZG8	Mthfd2l	Probable bifunctional methylenetetrahydrofolate dehydrogenase/cyclohydrolase 2 OS=Mus musculus GN=Mthfd2l PE=3 SV=1	78460.2	61201.7	73537.3	60938.9	83065.1	63870.4	64382.6	72400	69683.4	70820.8	-0.129593	0.691713
D3Z4S3	Ptrhd1	Putative peptidyl-tRNA hydrolase PTRHD1 OS=Mus musculus GN=Ptrhd1 PE=3 SV=1	330286	338783	337841	348027	311092	390584	383179	359687	340748	362354	0.157854	0.0871551
D3Z5L6	Slc18b1	MFS-type transporter SLC18B1 OS=Mus musculus GN=Slc18b1 PE=2 SV=2	61319.9	63500.8	69455.8	62626.5	91358.6	68661.5	61426.4	77560.4	66623.6	73507.1	0.190659	0.959977
D3Z6Q9	Bin2	Bridging integrator 2 OS=Mus musculus GN=Bin2 PE=1 SV=1	662018	706111	779869	453293	685012	875367	957278	745004	769578	821415	0.395513	0.0912796
D3Z7P3	Gls	"Glutaminase kidney isoform, mitochondrial OS=Mus musculus GN=Gls PE=1 SV=1"	1.39996e+06	1.29484e+06	1.50546e+06	1.38831e+06	1.4075e+06	1.47072e+06	1.49015e+06	1.38202e+06	1.46328e+06	1.41977e+06	0.0810896	0.507038
E1U8D0	Soga1	Protein SOGA1 OS=Mus musculus GN=Soga1 PE=1 SV=3	875014	792060	966985	865078	1.00878e+06	735550	795833	850933	826023	810340	-0.188981	0.13891
E2JF22	Piezo1	Piezo-type mechanosensitive ion channel component 1 OS=Mus musculus GN=Piezo1 PE=1 SV=1	293721	317210	307988	326204	326682	316127	346484	295968	319209	319607	0.00503318	0.788177
E9PV24	Fga	Fibrinogen alpha chain OS=Mus musculus GN=Fga PE=2 SV=1	2.63496e+07	3.06359e+07	2.86887e+07	2.37189e+07	2.98221e+07	2.86764e+07	2.86373e+07	2.77268e+07	2.57222e+07	3.24164e+07	-0.00327752	0.742131
E9PVB5-2	Ttc17	Isoform 2 of Tetratricopeptide repeat protein 17 OS=Mus musculus GN=Ttc17	37748.1	28649	35023.9	26601.6	34489.6	34919.6	37220	36412.4	32798	36836.7	0.102602	0.305526
E9PVD3	Dchs1	Protocadherin-16 OS=Mus musculus GN=Dchs1 PE=1 SV=1	75449.9	86081.6	82135.4	77560.5	88271.6	77131.7	83837.8	81001.1	90041	83424	0.0340948	0.822151
E9PZJ8	Ascc3	Activating signal cointegrator 1 complex subunit 3 OS=Mus musculus GN=Ascc3 PE=1 SV=1	378792	343499	414857	284127	486541	342921	358216	381796	358659	369891	-0.130734	0.785838
E9Q1P8	Irf2bp2	Interferon regulatory factor 2-binding protein 2 OS=Mus musculus GN=Irf2bp2 PE=1 SV=1	509102	525786	542851	544293	502375	505160	510968	502490	503781	479012	-0.105827	0.270328
E9Q414	Apob	Apolipoprotein B-100 OS=Mus musculus GN=Apob PE=1 SV=1	5.49333e+06	5.70573e+06	5.68237e+06	5.68299e+06	5.83674e+06	5.05976e+06	5.24339e+06	5.13224e+06	4.92536e+06	5.77833e+06	-0.249789	0.116261
E9Q4Z2	Acacb	Acetyl-CoA carboxylase 2 OS=Mus musculus GN=Acacb PE=1 SV=1	1.61115e+07	1.94042e+07	1.69638e+07	9.69177e+06	1.81585e+07	1.40129e+07	1.37253e+07	1.61056e+07	1.59181e+07	1.57496e+07	-0.158259	0.842155
E9Q555	Rnf213	E3 ubiquitin-protein ligase RNF213 OS=Mus musculus GN=Rnf213 PE=2 SV=1	7.60732e+06	7.88976e+06	7.58229e+06	7.76333e+06	7.47588e+06	8.37878e+06	8.11063e+06	7.85763e+06	7.64104e+06	7.63476e+06	0.05803	0.448673
E9Q557	Dsp	Desmoplakin OS=Mus musculus GN=Dsp PE=1 SV=1	314028	446794	375615	411737	470082	289340	297597	322552	309281	352934	-0.707295	0.0502799
E9Q634	Myo1e	Unconventional myosin-Ie OS=Mus musculus GN=Myo1e PE=1 SV=1	231135	217840	222428	232174	205753	273880	255306	251291	247202	268762	0.310765	0.0179924
E9Q735	Ube4a	Ubiquitin conjugation factor E4 A OS=Mus musculus GN=Ube4a PE=1 SV=1	2.49436e+06	2.42009e+06	2.36892e+06	1.94928e+06	2.42181e+06	2.63348e+06	2.67984e+06	2.51877e+06	2.46326e+06	2.49883e+06	0.0791247	0.181805
E9Q7X6	Heg1	Protein HEG homolog 1 OS=Mus musculus GN=Heg1 PE=1 SV=1	12040.2	10777.1	9853.14	12014.6	7755.67	17104.5	15373	14108	15041.3	12706.5	0.893675	0.0239954
E9Q8I9	Fry	Isoform 2 of Protein furry homolog OS=Mus musculus GN=Fry	8.92468e+06	8.60063e+06	1.0245e+07	5.1823e+06	1.13969e+07	1.05495e+07	1.04554e+07	1.0404e+07	1.04941e+07	1.00752e+07	0.340878	0.285933
E9QAM5	Helz2	Helicase with zinc finger domain 2 OS=Mus musculus GN=Helz2 PE=1 SV=1	158634	146802	150271	136366	158001	166620	166521	151971	157395	166848	0.2329	0.179103
F6ZDS4	Tpr	Nucleoprotein TPR OS=Mus musculus GN=Tpr PE=1 SV=1	1.36637e+07	1.1632e+07	1.26121e+07	1.05325e+07	1.22259e+07	1.11362e+07	1.12738e+07	1.07678e+07	1.18304e+07	1.11462e+07	-0.220565	0.283594
F7BWT7	Tspan15	Tetraspanin-15 OS=Mus musculus GN=Tspan15 PE=2 SV=2	432202	468009	495389	487705	557696	464851	486871	440477	476031	512203	-0.0987969	0.76449
F8VPU2	Farp1	"FERM, RhoGEF and pleckstrin domain-containing protein 1 OS=Mus musculus GN=Farp1 PE=1 SV=1"	3.70429e+06	2.32442e+06	2.94345e+06	1.75745e+06	2.70165e+06	3.05346e+06	3.06749e+06	2.81244e+06	3.16626e+06	2.76364e+06	0.265356	0.438378
G3X982	Aox3	Aldehyde oxidase 3 OS=Mus musculus GN=Aox3 PE=1 SV=1	98914.2	115646	109049	151848	111976	90749.2	86273	96859.4	106776	89281.5	-0.525523	0.0748933
G3X9K3	Arfgef1	Brefeldin A-inhibited guanine nucleotide-exchange protein 1 OS=Mus musculus GN=Arfgef1 PE=2 SV=1	1.77112e+06	1.74316e+06	1.78711e+06	2.14297e+06	1.7055e+06	1.76668e+06	1.7477e+06	1.68363e+06	1.77158e+06	1.73298e+06	-0.0355145	0.470306
G3XA57-2	Rab11fip2	Isoform 2 of Rab11 family-interacting protein 2 OS=Mus musculus GN=Rab11fip2	127660	122308	151964	165116	156038	103513	88862.9	103853	124116	118534	-0.863264	0.0307301
G5E829	Atp2b1	Plasma membrane calcium-transporting ATPase 1 OS=Mus musculus GN=Atp2b1 PE=1 SV=1	8.73075e+06	9.01319e+06	9.29184e+06	9.68666e+06	9.97976e+06	8.63311e+06	9.1824e+06	8.93065e+06	8.54294e+06	9.26329e+06	-0.100648	0.363489
G5E870	Trip12	E3 ubiquitin-protein ligase TRIP12 OS=Mus musculus GN=Trip12 PE=1 SV=1	2.83525e+06	2.84959e+06	2.96067e+06	4.05237e+06	3.17487e+06	2.86263e+06	2.76284e+06	2.86105e+06	3.05726e+06	2.7052e+06	-0.0917782	0.304142
G5E8K5-2	Ank3	Isoform 2 of Ankyrin-3 OS=Mus musculus GN=Ank3	384005	263564	327737	263757	206482	273256	313984	240793	323665	271386	0.0721327	0.995102
O08528	Hk2	Hexokinase-2 OS=Mus musculus GN=Hk2 PE=2 SV=1	2.21452e+07	2.51133e+07	2.19246e+07	2.28902e+07	2.38736e+07	1.787e+07	1.74488e+07	1.91658e+07	1.84223e+07	1.78744e+07	-0.628947	0.00445452
O08529	Capn2	Calpain-2 catalytic subunit OS=Mus musculus GN=Capn2 PE=2 SV=4	4.45127e+07	4.597e+07	4.67172e+07	4.19807e+07	4.70514e+07	5.8142e+07	6.08576e+07	5.3719e+07	5.33005e+07	5.89765e+07	0.523426	0.00655441
O08530	S1pr1	Sphingosine 1-phosphate receptor 1 OS=Mus musculus GN=S1pr1 PE=1 SV=3	728787	581113	386233	651497	537056	529170	768798	495762	758944	669885	0.325512	0.535242
O08532-3	Cacna2d1	Isoform 2C of Voltage-dependent calcium channel subunit alpha-2/delta-1 OS=Mus musculus GN=Cacna2d1	545639	380147	422853	511066	333611	362187	498962	372006	424230	416789	-0.0376986	0.764054
O08538	Angpt1	Angiopoietin-1 OS=Mus musculus GN=Angpt1 PE=1 SV=2	37583.5	35919.8	34475.3	38292.1	36185.7	26134.4	28246.3	28201	23548	25417.6	-0.812027	0.00295584
O08539	Bin1	Isoform 2 of Myc box-dependent-interacting protein 1 OS=Mus musculus GN=Bin1	5.61587e+06	5.24051e+06	4.58228e+06	5.79582e+06	4.48807e+06	6.50447e+06	6.46301e+06	5.09611e+06	5.37159e+06	5.52091e+06	0.121128	0.237417
O08547	Sec22b	Vesicle-trafficking protein SEC22b OS=Mus musculus GN=Sec22b PE=1 SV=3	6.30424e+06	6.64781e+06	6.23229e+06	8.77888e+06	6.61704e+06	6.70101e+06	6.8236e+06	6.94761e+06	6.63492e+06	6.5857e+06	0.0205623	0.857369
O08553	Dpysl2	Dihydropyrimidinase-related protein 2 OS=Mus musculus GN=Dpysl2 PE=1 SV=2	2.99414e+07	2.85664e+07	3.15605e+07	3.16344e+07	3.14395e+07	2.98462e+07	3.1103e+07	2.76168e+07	2.78806e+07	3.09677e+07	-0.0969999	0.477562
O08573-2	Lgals9	Isoform Short of Galectin-9 OS=Mus musculus GN=Lgals9	1.19983e+06	976745	1.07944e+06	848832	1.00668e+06	1.08006e+06	1.11437e+06	1.06738e+06	1.11229e+06	950897	0.148916	0.617676
O08579	Emd	Emerin OS=Mus musculus GN=Emd PE=1 SV=1	3.7231e+06	3.31068e+06	3.41472e+06	2.70151e+06	3.57921e+06	3.06273e+06	3.06328e+06	3.12326e+06	3.11294e+06	3.13966e+06	-0.207397	0.383921
O08582	Gtpbp1	GTP-binding protein 1 OS=Mus musculus GN=Gtpbp1 PE=1 SV=2	1.12778e+06	1.44963e+06	1.28547e+06	2.4733e+06	1.3113e+06	1.13588e+06	1.16121e+06	1.19897e+06	1.21382e+06	1.18981e+06	-0.260379	0.230599
O08583	Alyref	THO complex subunit 4 OS=Mus musculus GN=Alyref PE=1 SV=3	2.78189e+06	2.22307e+06	2.59707e+06	1.90335e+06	2.72636e+06	2.30405e+06	2.08106e+06	2.28672e+06	2.51599e+06	2.16196e+06	-0.285753	0.538375
O08585	Clta	Clathrin light chain A OS=Mus musculus GN=Clta PE=1 SV=2	2.3652e+06	1.86085e+06	2.86761e+06	1.59259e+06	2.67508e+06	1.68096e+06	1.84962e+06	2.25238e+06	1.95679e+06	1.69151e+06	-0.552025	0.304025
O08586	Pten	"Phosphatidylinositol 3,4,5-trisphosphate 3-phosphatase and dual-specificity protein phosphatase PTEN OS=Mus musculus GN=Pten PE=1 SV=1"	471376	470156	421847	543990	394606	398722	401176	435031	412664	376857	-0.367978	0.157889
O08599	Stxbp1	Syntaxin-binding protein 1 OS=Mus musculus GN=Stxbp1 PE=1 SV=2	1.69905e+06	1.39621e+06	1.48331e+06	1.5713e+06	1.21088e+06	1.63237e+06	1.53829e+06	1.3771e+06	1.35982e+06	1.56993e+06	0.12181	0.850386
O08600	Endog	"Endonuclease G, mitochondrial OS=Mus musculus GN=Endog PE=2 SV=1"	34286.5	37843.8	32319.1	33104.3	31153.7	42406.2	38576	34699.3	34177.8	37846.9	0.319205	0.169928
O08601-2	Mttp	Isoform 2 of Microsomal triglyceride transfer protein large subunit OS=Mus musculus GN=Mttp	645649	819217	857263	1.3254e+06	788326	498140	432010	600661	615273	520193	-1.13273	0.0251425
O08605	Mknk1	MAP kinase-interacting serine/threonine-protein kinase 1 OS=Mus musculus GN=Mknk1 PE=1 SV=2	754504	698456	674149	748762	780980	827575	846751	770476	728880	824669	0.198754	0.156926
O08609	Mlx	Max-like protein X OS=Mus musculus GN=Mlx PE=1 SV=1	605814	703142	617844	500698	820124	818413	830965	747753	836390	751158	0.637327	0.084365
O08638	Myh11	Myosin-11 OS=Mus musculus GN=Myh11 PE=1 SV=1	1.00066e+08	5.09549e+07	6.38093e+07	5.11275e+07	4.84318e+07	5.04136e+07	5.87559e+07	4.41025e+07	4.94146e+07	5.19899e+07	-0.0468285	0.35165
O08648-2	Map3k4	Isoform B of Mitogen-activated protein kinase kinase kinase 4 OS=Mus musculus GN=Map3k4	357991	397730	451070	290066	439735	358621	321361	430705	407303	397729	0.00280997	0.981188
O08663	Metap2	Methionine aminopeptidase 2 OS=Mus musculus GN=Metap2 PE=1 SV=1	5.37463e+06	5.2393e+06	5.33002e+06	5.66923e+06	5.13015e+06	4.92788e+06	4.86974e+06	4.99226e+06	5.12549e+06	4.90594e+06	-0.1782	0.0999874
O08677-2	Kng1	Isoform LMW of Kininogen-1 OS=Mus musculus GN=Kng1	3.58015e+06	3.80703e+06	4.03125e+06	3.84142e+06	3.28214e+06	3.2513e+06	3.31216e+06	2.94902e+06	3.06923e+06	3.70718e+06	-0.357359	0.10675
O08677	Kng1	Kininogen-1 OS=Mus musculus GN=Kng1 PE=1 SV=1	666519	782011	744999	770905	683435	746072	770590	711785	709680	758428	0.00485695	0.815132
O08688	Capn5	Calpain-5 OS=Mus musculus GN=Capn5 PE=2 SV=1	928476	808546	856132	1.01382e+06	955245	748244	839885	912802	863653	880929	-0.170217	0.35242
O08691	Arg2	"Arginase-2, mitochondrial OS=Mus musculus GN=Arg2 PE=1 SV=1"	121645	76589.8	129204	65129.9	60747.4	64736.2	74627.5	61728.2	100096	57180.7	-0.436717	0.401236
O08709	Prdx6	Peroxiredoxin-6 OS=Mus musculus GN=Prdx6 PE=1 SV=3	7.91826e+07	7.86508e+07	6.50519e+07	8.41226e+07	6.43469e+07	8.51439e+07	8.97748e+07	7.57825e+07	7.93973e+07	7.55378e+07	0.0108712	0.310656
O08715	Akap1	"Isoform 4 of A-kinase anchor protein 1, mitochondrial OS=Mus musculus GN=Akap1"	1.52721e+06	1.47346e+06	1.47006e+06	1.24909e+06	1.40083e+06	1.37166e+06	1.43395e+06	1.38782e+06	1.46642e+06	1504480	-0.0548637	0.908784
O08734	Bak1	Bcl-2 homologous antagonist/killer OS=Mus musculus GN=Bak1 PE=1 SV=2	468688	416621	538230	460604	472192	343584	447523	376529	425367	408138	-0.323805	0.0827998
O08736	Casp12	Caspase-12 OS=Mus musculus GN=Casp12 PE=1 SV=1	505157	409049	467938	435332	474968	416531	446637	422950	446027	462014	-0.116032	0.512526
O08738	Casp6	Caspase-6 OS=Mus musculus GN=Casp6 PE=2 SV=1	1.38785e+06	1.34961e+06	1.36846e+06	1.4837e+06	1.20904e+06	1.43057e+06	1.56983e+06	1.39378e+06	1.47923e+06	1.24636e+06	0.100356	0.544154
O08739	Ampd3	AMP deaminase 3 OS=Mus musculus GN=Ampd3 PE=2 SV=2	6.61499e+06	6.7604e+06	6.29586e+06	1.34582e+07	4.82785e+06	6.53732e+06	7.02294e+06	6.08728e+06	5.71888e+06	6.58436e+06	-0.0676923	0.635429
O08740	Polr2j	DNA-directed RNA polymerase II subunit RPB11 OS=Mus musculus GN=Polr2j PE=2 SV=1	629450	457852	578612	347646	516920	509548	518946	522871	547693	488040	-4.86e-05	0.781423
O08749	Dld	"Dihydrolipoyl dehydrogenase, mitochondrial OS=Mus musculus GN=Dld PE=1 SV=2"	2.85499e+07	3.08656e+07	2.61732e+07	2.70736e+07	2.88493e+07	2.85696e+07	2.76575e+07	2.67774e+07	2.57735e+07	2.58991e+07	-0.142285	0.390852
O08756	Hsd17b10	3-hydroxyacyl-CoA dehydrogenase type-2 OS=Mus musculus GN=Hsd17b10 PE=1 SV=4	1.11502e+07	1.2373e+07	9.38394e+06	9.88062e+06	9.58696e+06	1.2496e+07	1.08757e+07	1.17297e+07	1.05543e+07	1.10079e+07	0.249515	0.336799
O08759	Ube3a	Ubiquitin-protein ligase E3A OS=Mus musculus GN=Ube3a PE=1 SV=1	4.49656e+06	4.6465e+06	4.47676e+06	4.24914e+06	4.80709e+06	4.74218e+06	4.96079e+06	5.36277e+06	5.27301e+06	4.70183e+06	0.220662	0.0965556
O08784	Tcof1	Treacle protein OS=Mus musculus GN=Tcof1 PE=1 SV=1	4.67594e+06	3.79424e+06	3.95774e+06	2.58862e+06	3.68433e+06	4.58804e+06	4.10039e+06	3.516e+06	4.25712e+06	3.59385e+06	0.180996	0.577341
O08788	Dctn1	Dynactin subunit 1 OS=Mus musculus GN=Dctn1 PE=1 SV=3	1.89286e+07	1.87094e+07	1.97032e+07	1.64302e+07	2.03809e+07	2.07768e+07	2.03597e+07	2.01311e+07	2.00114e+07	2.05572e+07	0.163652	0.184297
O08791	Ebf3	Isoform Short of Transcription factor COE3 OS=Mus musculus GN=Ebf3	695621	720583	917580	641065	967554	587173	567396	619889	669112	648741	-0.354976	0.0715656
O08795	Prkcsh	Isoform 2 of Glucosidase 2 subunit beta OS=Mus musculus GN=Prkcsh	8.36396e+06	9.38564e+06	7.87614e+06	8.48625e+06	8.15681e+06	1.13458e+07	1.08464e+07	9.54107e+06	1.03661e+07	1.07067e+07	0.557452	0.0114331
O08796	Eef2k	Eukaryotic elongation factor 2 kinase OS=Mus musculus GN=Eef2k PE=1 SV=1	393401	304203	423053	242007	438524	320933	326681	385435	357452	330736	-0.383883	0.895271
O08800	Serpinb8	Serpin B8 OS=Mus musculus GN=Serpinb8 PE=2 SV=2	1.72168e+06	1.70522e+06	1.73772e+06	1.82194e+06	1.74419e+06	1.74908e+06	1.60483e+06	1.75911e+06	1.59302e+06	1.69004e+06	-0.0649332	0.393779
O08807	Prdx4	Peroxiredoxin-4 OS=Mus musculus GN=Prdx4 PE=1 SV=1	5.65673e+06	5.34697e+06	5.20144e+06	6.20443e+06	5.1644e+06	6.53031e+06	6.67422e+06	5.9237e+06	5.69557e+06	6.09045e+06	0.307644	0.108858
O08808	Diaph1	Protein diaphanous homolog 1 OS=Mus musculus GN=Diaph1 PE=1 SV=1	9.87128e+06	9.41911e+06	9.36505e+06	1.02798e+07	9.01494e+06	1.14577e+07	1.16192e+07	1.00788e+07	1.11338e+07	1.08026e+07	0.368388	0.0360443
O08810	Eftud2	116 kDa U5 small nuclear ribonucleoprotein component OS=Mus musculus GN=Eftud2 PE=2 SV=1	7.62823e+06	6.20292e+06	7.3506e+06	4.51899e+06	6.70761e+06	6.13581e+06	6.036e+06	5.70551e+06	6.57029e+06	5.75943e+06	-0.244764	0.680492
O08811	Ercc2	TFIIH basal transcription factor complex helicase XPD subunit OS=Mus musculus GN=Ercc2 PE=2 SV=2	62326.1	59325.4	79277.1	61176	69768.2	53529.9	57928.7	68683.8	58623	60439.9	-0.152625	0.282471
O08848	Trove2	60 kDa SS-A/Ro ribonucleoprotein OS=Mus musculus GN=Trove2 PE=1 SV=1	1.21662e+06	1.11191e+06	1.27619e+06	1078991	1.33691e+06	1.17551e+06	1.19588e+06	1.16153e+06	1.15051e+06	1.21776e+06	-0.0770926	0.807282
O08911	Mapk12	Mitogen-activated protein kinase 12 OS=Mus musculus GN=Mapk12 PE=1 SV=1	398848	406032	356474	442279	381496	405210	374178	383600	376028	415959	-0.101138	0.844648
O08912	Galnt1	Polypeptide N-acetylgalactosaminyltransferase 1 OS=Mus musculus GN=Galnt1 PE=1 SV=1	81835.6	75351.1	75372	75457.7	74595.9	91720.9	81481.6	76919.1	76408.2	77693.2	0.0659027	0.380449
O08915	Aip	AH receptor-interacting protein OS=Mus musculus GN=Aip PE=1 SV=1	2.77914e+06	3.0246e+06	2.94196e+06	2.94261e+06	2.79172e+06	3.37048e+06	3.66418e+06	3.03021e+06	3.09873e+06	3.43063e+06	0.306199	0.0513286
O08917	Flot1	Flotillin-1 OS=Mus musculus GN=Flot1 PE=1 SV=1	7.18393e+06	5.40017e+06	5.65044e+06	6.83824e+06	5.26885e+06	5.54996e+06	7.02466e+06	6.91135e+06	6.87069e+06	5.94604e+06	0.417048	0.545382
O08919	Numbl	Numb-like protein OS=Mus musculus GN=Numbl PE=1 SV=3	277788	315971	303508	745691	357327	202218	242583	274080	256025	194337	-0.692411	0.0812717
O08967	Cyth3	Cytohesin-3 OS=Mus musculus GN=Cyth3 PE=1 SV=1	325964	305253	371226	281567	328237	327020	309699	383063	323664	315571	-0.0282137	0.737081
O08983	Hps1	Hermansky-Pudlak syndrome 1 protein homolog OS=Mus musculus GN=Hps1 PE=2 SV=2	190530	198663	213385	190227	248449	97830.3	138994	183046	185091	135533	-0.875872	0.056572
O08992	Sdcbp	Syntenin-1 OS=Mus musculus GN=Sdcbp PE=1 SV=1	577207	488926	513129	558179	477284	540646	515060	465289	502488	510862	-0.0132606	0.666806
O08997	Atox1	Copper transport protein ATOX1 OS=Mus musculus GN=Atox1 PE=1 SV=1	8.1572e+06	7.61979e+06	7.55048e+06	7.39659e+06	6.97066e+06	8.42781e+06	8.63047e+06	8.96684e+06	8.59961e+06	7.85454e+06	0.271489	0.0552714
O09000	Ncoa3	Nuclear receptor coactivator 3 OS=Mus musculus GN=Ncoa3 PE=1 SV=2	199096	205187	197125	210235	191370	194667	184118	193516	207259	196770	-0.052583	0.572221
O09005	Degs1	Sphingolipid delta(4)-desaturase DES1 OS=Mus musculus GN=Degs1 PE=2 SV=1	248414	328515	310283	356577	321848	213764	279778	199018	292652	258294	-0.504138	0.0917313
O09012	Pex5	Peroxisomal targeting signal 1 receptor OS=Mus musculus GN=Pex5 PE=2 SV=2	1.69172e+06	1.70126e+06	1.9544e+06	1.60641e+06	1.98881e+06	1.82798e+06	1.88789e+06	1.791e+06	1.8814e+06	1.86565e+06	0.216729	0.576292
O09035	Dbil5	Diazepam-binding inhibitor-like 5 OS=Mus musculus GN=Dbil5 PE=2 SV=1	366569	517966	213968	2.59488e+06	63215.5	162445	265925	138116	201716	157722	-3.44646	0.37468
O09044	Snap23	Synaptosomal-associated protein 23 OS=Mus musculus GN=Snap23 PE=1 SV=1	2.2484e+06	2.33533e+06	2.33858e+06	2.56893e+06	2.57016e+06	2.40263e+06	2.54306e+06	2.41319e+06	2.52474e+06	2.53742e+06	0.156049	0.563009
O09046	Il4i1	L-amino-acid oxidase OS=Mus musculus GN=Il4i1 PE=1 SV=1	338559	346513	330344	399332	154577	226924	315406	147359	268183	162924	-0.902194	0.257975
O09061	Psmb1	Proteasome subunit beta type-1 OS=Mus musculus GN=Psmb1 PE=1 SV=1	6.9913e+06	7.17934e+06	7.07432e+06	7.1094e+06	5.98466e+06	7.34735e+06	7.77037e+06	7.50418e+06	7.39566e+06	7.21362e+06	0.0859845	0.168942
O09106	Hdac1	Histone deacetylase 1 OS=Mus musculus GN=Hdac1 PE=1 SV=1	513610	364724	377991	378002	382580	440928	420715	341526	442119	389275	0.232616	0.919923
O09107	Insl3	Insulin-like 3 OS=Mus musculus GN=Insl3 PE=2 SV=2	206590	333279	261764	413105	161452	265613	262569	207126	174911	191758	-0.563032	0.457428
O09110-2	Map2k3	Isoform 1 of Dual specificity mitogen-activated protein kinase kinase 3 OS=Mus musculus GN=Map2k3	893499	1.03761e+06	916613	1.07488e+06	983078	1.16728e+06	1.14169e+06	1.03841e+06	977986	1.0909e+06	0.222431	0.172546
O09111	Ndufb11	"NADH dehydrogenase [ubiquinone] 1 beta subcomplex subunit 11, mitochondrial OS=Mus musculus GN=Ndufb11 PE=1 SV=2"	1.1708e+06	1.08758e+06	1.22678e+06	1.05134e+06	1.01777e+06	920127	917956	930833	998072	934014	-0.363793	0.0246709
O09117-2	Sypl1	Isoform 2 of Synaptophysin-like protein 1 OS=Mus musculus GN=Sypl1	1.85489e+06	1.88298e+06	1.41658e+06	1.81587e+06	1.41399e+06	1.83309e+06	1.91025e+06	2.12108e+06	1.73634e+06	2.19612e+06	0.0890608	0.154425
O09118	Ntn1	Netrin-1 OS=Mus musculus GN=Ntn1 PE=1 SV=3	300830	188524	273429	161949	230884	212650	213203	242868	252469	208968	-0.200574	0.997938
O09131	Gsto1	Glutathione S-transferase omega-1 OS=Mus musculus GN=Gsto1 PE=2 SV=2	7.12543e+06	7.0668e+06	5.78856e+06	7.41993e+06	5.49951e+06	8.64163e+06	8.86649e+06	6.99746e+06	7.73205e+06	7.28264e+06	0.189768	0.0957427
O09159	Man2b1	Lysosomal alpha-mannosidase OS=Mus musculus GN=Man2b1 PE=2 SV=4	4.90958e+06	5.07043e+06	5.18992e+06	7.54641e+06	4.61531e+06	4.75171e+06	4.60383e+06	4.58468e+06	4.60455e+06	4.56397e+06	-0.233834	0.206676
O09164	Sod3	Extracellular superoxide dismutase [Cu-Zn] OS=Mus musculus GN=Sod3 PE=1 SV=1	1.32748e+07	1.01237e+07	1.00528e+07	1.16141e+07	9.23059e+06	1.74724e+07	1.84925e+07	1.29855e+07	1.48707e+07	1.51228e+07	0.952575	0.0167092
O09167	Rpl21	60S ribosomal protein L21 OS=Mus musculus GN=Rpl21 PE=2 SV=3	1.4752e+06	765203	1.46638e+06	687025	1.36443e+06	1.70683e+06	1.86198e+06	1.58549e+06	1.64163e+06	1.6525e+06	0.415007	0.0751655
O09172	Gclm	Glutamate--cysteine ligase regulatory subunit OS=Mus musculus GN=Gclm PE=2 SV=1	3.40588e+06	2.90738e+06	4.0277e+06	2.79402e+06	3.62594e+06	3.23511e+06	3.25003e+06	3.32029e+06	3.35261e+06	3.34779e+06	-0.0691228	0.957751
O09173	Hgd	"Homogentisate 1,2-dioxygenase OS=Mus musculus GN=Hgd PE=1 SV=2"	930279	935177	1.10439e+06	1.15671e+06	962337	545212	525296	549081	670705	622871	-1.35262	0.00269908
O09174	Amacr	Alpha-methylacyl-CoA racemase OS=Mus musculus GN=Amacr PE=1 SV=4	1.1863e+06	1.15342e+06	1.1915e+06	1.19451e+06	1.01567e+06	852151	991132	919766	967584	900945	-0.577639	0.0125616
O35071	Kif1c	Kinesin-like protein KIF1C OS=Mus musculus GN=Kif1c PE=2 SV=2	2.30778e+06	1.98446e+06	2.1396e+06	1.47211e+06	2.16169e+06	2.4442e+06	2.44118e+06	2.24672e+06	2.35168e+06	2.2814e+06	0.191725	0.145117
O35074	Ptgis	Prostacyclin synthase OS=Mus musculus GN=Ptgis PE=2 SV=1	5.43313e+06	5.80681e+06	5.97498e+06	6.3033e+06	6.2538e+06	5.64885e+06	5.33924e+06	5.82508e+06	5.57425e+06	5.89131e+06	-0.126534	0.351394
O35075	Dscr3	Down syndrome critical region protein 3 homolog OS=Mus musculus GN=Dscr3 PE=2 SV=1	280444	317372	290312	348750	270605	339000	312796	302323	385712	326252	0.263856	0.2541
O35083	Agpat1	1-acyl-sn-glycerol-3-phosphate acyltransferase alpha OS=Mus musculus GN=Agpat1 PE=2 SV=1	161255	162320	196348	181291	187564	158762	154989	169113	157991	163744	-0.349998	0.148945
O35098	Dpysl4	Dihydropyrimidinase-related protein 4 OS=Mus musculus GN=Dpysl4 PE=1 SV=1	227353	254190	219326	275513	203846	274269	247964	245183	247154	260839	0.193293	0.318446
O35099	Map3k5	Mitogen-activated protein kinase kinase kinase 5 OS=Mus musculus GN=Map3k5 PE=1 SV=3	800236	760326	816804	520698	835960	774868	804850	767334	793467	751683	-0.0679444	0.654019
O35114	Scarb2	Lysosome membrane protein 2 OS=Mus musculus GN=Scarb2 PE=1 SV=3	2.54031e+06	2.6886e+06	2.8732e+06	2.9452e+06	2.66139e+06	2.51495e+06	2.66495e+06	2.61717e+06	2.862e+06	2.8251e+06	-0.0205643	0.795247
O35127	Grcc10	Protein C10 OS=Mus musculus GN=Grcc10 PE=2 SV=1	184635	170238	173132	172574	156893	163301	165340	162317	167612	170612	-0.106208	0.517482
O35129	Phb2	Prohibitin-2 OS=Mus musculus GN=Phb2 PE=1 SV=1	1.31934e+07	1.44247e+07	1.34794e+07	1.31641e+07	1.32032e+07	1.12721e+07	1.16268e+07	1.20569e+07	1.22902e+07	1.24635e+07	-0.247902	0.0327968
O35134	Polr1a	DNA-directed RNA polymerase I subunit RPA1 OS=Mus musculus GN=Polr1a PE=1 SV=2	207886	186710	211346	201055	199633	220803	207493	206460	222166	199104	0.0469763	0.357454
O35143	Atpif1	"ATPase inhibitor, mitochondrial OS=Mus musculus GN=Atpif1 PE=1 SV=2"	3.42088e+06	3.13122e+06	3.5797e+06	3.53624e+06	2.40666e+06	2.2091e+06	2.79764e+06	2.332e+06	2.72799e+06	2.55918e+06	-0.646297	0.0680222
O35153	Bet1l	BET1-like protein OS=Mus musculus GN=Bet1l PE=3 SV=1	481013	415419	458834	470741	439355	560514	438114	474604	464586	504043	0.0613893	0.317613
O35166	Gosr2	Golgi SNAP receptor complex member 2 OS=Mus musculus GN=Gosr2 PE=2 SV=2	1.34149e+06	1.29986e+06	1.39898e+06	1.65492e+06	1.26918e+06	1.47402e+06	1.33281e+06	1.42733e+06	1.40154e+06	1.63622e+06	0.125384	0.590723
O35177	Nedd9	Enhancer of filamentation 1 OS=Mus musculus GN=Nedd9 PE=1 SV=2	157919	135595	136988	97735.6	154108	172086	192115	166179	168369	153046	0.444067	0.0851347
O35206	Col15a1	Collagen alpha-1(XV) chain OS=Mus musculus GN=Col15a1 PE=1 SV=2	1.42979e+07	1.01517e+07	1.16601e+07	8.04612e+06	1.33672e+07	1.11446e+07	1.21779e+07	1.20243e+07	1.49717e+07	1.16438e+07	0.0542293	0.563186
O35215	Ddt	D-dopachrome decarboxylase OS=Mus musculus GN=Ddt PE=1 SV=3	3.32849e+07	3.58263e+07	2.87302e+07	3.87292e+07	2.82449e+07	3.37041e+07	3.28606e+07	3.15539e+07	3.23961e+07	3.33553e+07	-0.030913	0.988595
O35218	Cpsf2	Cleavage and polyadenylation specificity factor subunit 2 OS=Mus musculus GN=Cpsf2 PE=1 SV=1	711378	608441	771653	584104	680681	621334	623343	638072	647699	587782	-0.209601	0.375818
O35226-2	Psmd4	Isoform Rpn10B of 26S proteasome non-ATPase regulatory subunit 4 OS=Mus musculus GN=Psmd4	3.7245e+06	3.43413e+06	3.13766e+06	3.56423e+06	3.14444e+06	3.96013e+06	3.82177e+06	3.70636e+06	3.50011e+06	3.68216e+06	0.162013	0.141652
O35239	Ptpn9	Tyrosine-protein phosphatase non-receptor type 9 OS=Mus musculus GN=Ptpn9 PE=1 SV=2	2.10976e+06	2.16176e+06	2.33625e+06	2.27323e+06	2.38136e+06	2.2909e+06	2.3773e+06	2.36696e+06	2.3224e+06	2.33709e+06	0.0342241	0.406634
O35245	Pkd2	Isoform 3 of Polycystin-2 OS=Mus musculus GN=Pkd2	149127	152480	163178	154295	172054	152187	152511	159209	163274	161904	0.0353918	0.978928
O35250-2	Exoc7	Isoform 2 of Exocyst complex component 7 OS=Mus musculus GN=Exoc7	4.63242e+06	4.26118e+06	4.36566e+06	4.21895e+06	4.1579e+06	4.6061e+06	4.62898e+06	4.54448e+06	4.49148e+06	4.48434e+06	0.136213	0.241552
O35286	Dhx15	Putative pre-mRNA-splicing factor ATP-dependent RNA helicase DHX15 OS=Mus musculus GN=Dhx15 PE=1 SV=2	7.65706e+06	5.01297e+06	7.8623e+06	4.22081e+06	6.11688e+06	5.74857e+06	6.77458e+06	5.57913e+06	6.06007e+06	5.2409e+06	-0.0836163	0.899372
O35295	Purb	Transcriptional activator protein Pur-beta OS=Mus musculus GN=Purb PE=1 SV=3	1.45038e+06	1.02185e+06	1.30361e+06	556087	1.26304e+06	1.59071e+06	1.55229e+06	1.47591e+06	1.52056e+06	1.42552e+06	0.372943	0.136419
O35309	Nmi	N-myc-interactor OS=Mus musculus GN=Nmi PE=2 SV=1	3.3782e+06	3.21692e+06	3.32641e+06	2.28729e+06	3.10954e+06	3.30399e+06	3.53856e+06	3.26117e+06	3.2891e+06	3.28354e+06	0.0485252	0.35354
O35326	Srsf5	Serine/arginine-rich splicing factor 5 OS=Mus musculus GN=Srsf5 PE=1 SV=2	2.78068e+06	2.27807e+06	3.58822e+06	1.11011e+06	2.54203e+06	2.86932e+06	3.09248e+06	2.41007e+06	3.02556e+06	2.59955e+06	0.26082	0.466602
O35343	Kpna4	Importin subunit alpha-3 OS=Mus musculus GN=Kpna4 PE=1 SV=1	1.55197e+06	1.26017e+06	1.45122e+06	685258	1.44045e+06	1.93881e+06	2.01986e+06	1.64232e+06	1.84579e+06	1.80322e+06	0.510755	0.0680039
O35344	Kpna3	Importin subunit alpha-4 OS=Mus musculus GN=Kpna3 PE=1 SV=1	1.18987e+06	1.10123e+06	1.15256e+06	878209	1.09935e+06	1.43029e+06	1.57551e+06	1.22248e+06	1.43297e+06	1.28832e+06	0.55818	0.0312662
O35345	Kpna6	Importin subunit alpha-7 OS=Mus musculus GN=Kpna6 PE=1 SV=2	614007	442900	538127	417146	494095	520877	573847	639523	991125	511361	0.332208	0.211109
O35350	Capn1	Calpain-1 catalytic subunit OS=Mus musculus GN=Capn1 PE=1 SV=1	1.00937e+07	9.61234e+06	9.82164e+06	1.11172e+07	1.02187e+07	1.08052e+07	1.0715e+07	1.03268e+07	1.04215e+07	9.99742e+06	0.0575942	0.585683
O35375-3	Nrp2	Isoform A5 of Neuropilin-2 OS=Mus musculus GN=Nrp2	469363	439553	477547	509416	446237	467819	406289	409218	426734	415047	-0.287269	0.116261
O35379	Abcc1	Multidrug resistance-associated protein 1 OS=Mus musculus GN=Abcc1 PE=1 SV=1	5.17214e+06	5.02449e+06	4.91075e+06	5.10044e+06	4.99081e+06	4.5741e+06	4.85752e+06	4.74106e+06	4.94728e+06	4.72791e+06	-0.140598	0.18205
O35381	Anp32a	Acidic leucine-rich nuclear phosphoprotein 32 family member A OS=Mus musculus GN=Anp32a PE=1 SV=1	8.53958e+06	7.66163e+06	8.79189e+06	4.15945e+06	7.90789e+06	7.88862e+06	7.21874e+06	7.45583e+06	7.40355e+06	7.82201e+06	-0.150198	0.789974
O35382	Exoc4	Exocyst complex component 4 OS=Mus musculus GN=Exoc4 PE=1 SV=2	3.63677e+06	3.21528e+06	3.39254e+06	3.31644e+06	3.36214e+06	3.56642e+06	3.53233e+06	3.50246e+06	3.53271e+06	3.39165e+06	0.0858103	0.426697
O35386	Phyh	"Phytanoyl-CoA dioxygenase, peroxisomal OS=Mus musculus GN=Phyh PE=1 SV=1"	1.5849e+06	1.69413e+06	1.51657e+06	1.59709e+06	1.34014e+06	1.18701e+06	1.27395e+06	1.23808e+06	1.36577e+06	1.27323e+06	-0.50051	0.0210546
O35387	Hax1	HCLS1-associated protein X-1 OS=Mus musculus GN=Hax1 PE=1 SV=1	153585	149413	148573	123500	155958	148419	135696	132623	143063	159708	-0.106978	0.864283
O35405	Pld3	Phospholipase D3 OS=Mus musculus GN=Pld3 PE=2 SV=1	222625	243742	271829	255120	225727	220306	241496	220000	226199	210552	-0.231838	0.211109
O35409	Folh1	Glutamate carboxypeptidase 2 OS=Mus musculus GN=Folh1 PE=2 SV=2	2.99008e+06	1.92346e+06	2.85946e+06	2.38635e+06	1.68279e+06	2.03679e+06	2.5921e+06	2.11334e+06	2.49187e+06	1.75528e+06	-0.327569	0.742881
O35435	Dhodh	"Dihydroorotate dehydrogenase (quinone), mitochondrial OS=Mus musculus GN=Dhodh PE=2 SV=2"	1.16654e+06	1.03398e+06	1.18119e+06	1.12371e+06	1.24487e+06	878516	875906	1.00038e+06	966325	1.07469e+06	-0.426708	0.0352592
O35459	Ech1	"Delta(3,5)-Delta(2,4)-dienoyl-CoA isomerase, mitochondrial OS=Mus musculus GN=Ech1 PE=1 SV=1"	2.39893e+07	2.5496e+07	2.19398e+07	2.58974e+07	1.95361e+07	2.73491e+07	2.78471e+07	2.92218e+07	28205430	2.55552e+07	0.335748	0.058872
O35465-2	Fkbp8	Isoform 2 of Peptidyl-prolyl cis-trans isomerase FKBP8 OS=Mus musculus GN=Fkbp8	3.60755e+06	3.89678e+06	3.76214e+06	3.88081e+06	4.08048e+06	3.69737e+06	3.75936e+06	3.77197e+06	3.61662e+06	3.87908e+06	-0.0837949	0.57908
O35488	Slc27a2	Very long-chain acyl-CoA synthetase OS=Mus musculus GN=Slc27a2 PE=1 SV=2	253265	219302	290090	278103	202582	205635	190709	190111	216689	190350	-0.669265	0.0573752
O35490	Bhmt	Betaine--homocysteine S-methyltransferase 1 OS=Mus musculus GN=Bhmt PE=1 SV=1	1.17879e+07	1.20217e+07	1.43744e+07	1.84302e+07	1.0834e+07	4.49938e+06	3.7021e+06	4.4617e+06	6.40577e+06	5.86554e+06	-2.66996	0.00295584
O35495	Cdk14	Cyclin-dependent kinase 14 OS=Mus musculus GN=Cdk14 PE=2 SV=2	118235	108944	104537	116713	106756	110704	132274	113728	112513	133280	0.0929485	0.265779
O35516	Notch2	Neurogenic locus notch homolog protein 2 OS=Mus musculus GN=Notch2 PE=1 SV=1	532467	450260	476173	555759	556776	559370	456283	497908	468099	540250	-0.162179	0.834686
O35551-2	Rabep1	Isoform 2 of Rab GTPase-binding effector protein 1 OS=Mus musculus GN=Rabep1	1.47785e+06	1.42954e+06	1.60619e+06	1.47554e+06	1.65113e+06	1.425e+06	1.42173e+06	1.59193e+06	1.43558e+06	1.50751e+06	-0.0984505	0.559196
O35566	Cd151	CD151 antigen OS=Mus musculus GN=Cd151 PE=2 SV=2	5.338e+06	6.1339e+06	5.78209e+06	8.07815e+06	7.42695e+06	7.17514e+06	6.66035e+06	7.12265e+06	6.83481e+06	7.43431e+06	0.333758	0.441688
O35593	Psmd14	26S proteasome non-ATPase regulatory subunit 14 OS=Mus musculus GN=Psmd14 PE=1 SV=2	3.36624e+06	3.38248e+06	3.08978e+06	3.3119e+06	3.08857e+06	3.85315e+06	3.75647e+06	3.5154e+06	3.65073e+06	3.55274e+06	0.186172	0.0356845
O35598	Adam10	Disintegrin and metalloproteinase domain-containing protein 10 OS=Mus musculus GN=Adam10 PE=1 SV=2	5.38858e+06	5.06702e+06	4.63623e+06	4.90945e+06	4.57865e+06	6.64265e+06	6.72165e+06	5.41345e+06	5.8075e+06	6.47178e+06	0.63821	0.0172081
O35601	Fyb	FYN-binding protein OS=Mus musculus GN=Fyb PE=1 SV=2	108177	105296	119686	109145	107970	113808	97712.7	100059	96452.5	106848	-0.19948	0.265295
O35604	Npc1	Niemann-Pick C1 protein OS=Mus musculus GN=Npc1 PE=1 SV=2	346812	405260	408047	497462	439022	306551	364055	359720	380128	368794	-0.264615	0.115901
O35607	Bmpr2	Bone morphogenetic protein receptor type-2 OS=Mus musculus GN=Bmpr2 PE=1 SV=1	139807	110584	123553	120244	106615	130592	123427	113185	126156	116592	0.0318673	0.829539
O35609	Scamp3	Secretory carrier-associated membrane protein 3 OS=Mus musculus GN=Scamp3 PE=1 SV=3	715795	686986	670135	675663	812668	747743	710819	725994	728707	788127	0.127756	0.51529
O35613	Daxx	Death domain-associated protein 6 OS=Mus musculus GN=Daxx PE=1 SV=1	578142	453154	452082	352197	453435	500687	526450	443997	482884	476087	0.131866	0.537741
O35621	Pmm1	Phosphomannomutase 1 OS=Mus musculus GN=Pmm1 PE=1 SV=1	379498	348663	346665	368095	342848	446722	411594	374755	380828	378794	0.198841	0.0959651
O35623	Bet1	BET1 homolog OS=Mus musculus GN=Bet1 PE=1 SV=1	291114	337055	311592	396915	332765	438733	452356	388970	368057	390785	0.350568	0.050728
O35625-2	Axin1	Isoform 2 of Axin-1 OS=Mus musculus GN=Axin1	46692.5	41905.7	55645.2	42627.1	56158	31568.5	32867.1	42653.2	44457.7	41421.2	-0.279157	0.0895487
O35638	Stag2	Cohesin subunit SA-2 OS=Mus musculus GN=Stag2 PE=1 SV=3	462896	357242	422143	340310	400456	380199	361187	341233	362355	364755	-0.240784	0.302908
O35639	Anxa3	Annexin A3 OS=Mus musculus GN=Anxa3 PE=1 SV=4	1.85274e+07	2.15703e+07	2.06294e+07	2.43577e+07	2.57672e+07	2.82108e+07	2.46993e+07	2.36252e+07	2.29733e+07	2.83356e+07	0.318705	0.164721
O35640	Anxa8	Annexin A8 OS=Mus musculus GN=Anxa8 PE=2 SV=2	438525	476794	455897	510083	524277	506753	481310	517294	515615	484281	0.144871	0.472668
O35643	Ap1b1	AP-1 complex subunit beta-1 OS=Mus musculus GN=Ap1b1 PE=2 SV=2	8.96762e+06	8.28056e+06	8.90964e+06	8.09212e+06	8.5119e+06	8.32027e+06	8.12867e+06	8.57088e+06	8.63342e+06	8.27299e+06	-0.0625647	0.684365
O35654	Pold2	DNA polymerase delta subunit 2 OS=Mus musculus GN=Pold2 PE=2 SV=2	242804	232258	240761	237727	262739	189652	180244	212716	207883	219983	-0.35175	0.0213221
O35658	C1qbp	"Complement component 1 Q subcomponent-binding protein, mitochondrial OS=Mus musculus GN=C1qbp PE=1 SV=1"	9.35844e+06	8.75701e+06	7.54947e+06	5.56337e+06	8.0097e+06	9.41382e+06	9.57772e+06	7.91439e+06	8.4005e+06	8.44169e+06	0.10384	0.352263
O35660	Gstm6	Glutathione S-transferase Mu 6 OS=Mus musculus GN=Gstm6 PE=2 SV=3	981170	402073	1.08256e+06	593172	110977	264103	409169	96034.8	638186	95599.5	-2.26326	0.29976
O35664	Ifnar2	Isoform 2 of Interferon alpha/beta receptor 2 OS=Mus musculus GN=Ifnar2	933574	972371	737051	1.03972e+06	805079	1.04824e+06	1.08751e+06	874948	863432	973488	0.092905	0.452838
O35671	Itgb1bp1	Integrin beta-1-binding protein 1 OS=Mus musculus GN=Itgb1bp1 PE=1 SV=1	327349	274827	328840	252335	305854	309655	278666	293967	274717	300556	-0.109853	0.844896
O35678	Mgll	Monoglyceride lipase OS=Mus musculus GN=Mgll PE=1 SV=1	9.08191e+07	8.68253e+07	7.30389e+07	9.60692e+07	8.98343e+07	9.78614e+07	9.58489e+07	9.87089e+07	9.30613e+07	1.05544e+08	0.168475	0.122504
O35682	Myadm	Myeloid-associated differentiation marker OS=Mus musculus GN=Myadm PE=2 SV=2	1.28132e+06	947483	1.27235e+06	1.078e+06	1.08157e+06	749075	938551	925007	1.08224e+06	756186	-0.401659	0.0691553
O35683	Ndufa1	NADH dehydrogenase [ubiquinone] 1 alpha subcomplex subunit 1 OS=Mus musculus GN=Ndufa1 PE=3 SV=1	331859	372886	331900	331346	353904	318262	298526	341413	318111	311343	-0.132226	0.15031
O35685	Nudc	Nuclear migration protein nudC OS=Mus musculus GN=Nudc PE=1 SV=1	4.90235e+06	4.96729e+06	4.58464e+06	5.74769e+06	4.59562e+06	5.12273e+06	5.47458e+06	4.45765e+06	4.91744e+06	4.84809e+06	-0.00580039	0.981912
O35691	Pnn	Pinin OS=Mus musculus GN=Pnn PE=1 SV=4	454284	302415	351172	291898	344484	363716	300951	368226	383375	312939	0.115321	0.995435
O35704	Sptlc1	Serine palmitoyltransferase 1 OS=Mus musculus GN=Sptlc1 PE=2 SV=2	194804	185535	195708	172013	195328	185462	172353	173000	165763	145696	-0.273484	0.116665
O35711-4	Ppfibp2	Isoform 2 of Liprin-beta-2 OS=Mus musculus GN=Ppfibp2	38565.8	46155.7	41684.8	44283.5	41449.4	44726.8	48934.3	38546.2	42452.2	44471.3	0.149468	0.677634
O35737	Hnrnph1	Heterogeneous nuclear ribonucleoprotein H OS=Mus musculus GN=Hnrnph1 PE=1 SV=3	1.66811e+06	1.09567e+06	1.65251e+06	814925	1.48563e+06	1.41136e+06	1.4219e+06	1.41452e+06	1.47637e+06	1.3547e+06	-0.114707	0.641096
O35744	Chil3	Chitinase-like protein 3 OS=Mus musculus GN=Chil3 PE=1 SV=2	191584	181968	160202	197290	170064	204043	175708	154488	162474	170209	-0.155361	0.648385
O35841	Api5	Apoptosis inhibitor 5 OS=Mus musculus GN=Api5 PE=1 SV=2	3.56474e+06	3.37346e+06	3.75524e+06	3.57051e+06	3.16963e+06	3.20894e+06	3.23171e+06	3.21931e+06	3.70236e+06	3.12697e+06	-0.239725	0.385399
O35855	Bcat2	"Branched-chain-amino-acid aminotransferase, mitochondrial OS=Mus musculus GN=Bcat2 PE=2 SV=2"	3.0322e+07	3.52473e+07	2.48728e+07	2.86247e+07	2.9338e+07	2.39306e+07	2.33071e+07	2.83392e+07	2.51554e+07	2.6166e+07	-0.361229	0.114178
O35857	Timm44	Mitochondrial import inner membrane translocase subunit TIM44 OS=Mus musculus GN=Timm44 PE=1 SV=2	1.67379e+07	1.76636e+07	1.5809e+07	1.6751e+07	1.61725e+07	1.45185e+07	1.50195e+07	1.50001e+07	1.47724e+07	1.5348e+07	-0.254844	0.0382775
O35864	Cops5	COP9 signalosome complex subunit 5 OS=Mus musculus GN=Cops5 PE=1 SV=3	6.62287e+06	6.49437e+06	6.17317e+06	5.05189e+06	6.25835e+06	6.97593e+06	6.8884e+06	6.48179e+06	6.34151e+06	6.86763e+06	0.196699	0.211586
O35887	Calu	Calumenin OS=Mus musculus GN=Calu PE=1 SV=1	4.3742e+07	1.29202e+07	3.61298e+07	8.47469e+06	2.96438e+07	5.48567e+07	5.53528e+07	3.82956e+07	4.07155e+07	4.78004e+07	1.05183	0.093399
O35892-2	Sp100	Isoform 2 of Nuclear autoantigen Sp-100 OS=Mus musculus GN=Sp100	75214.7	54493.7	70121.3	45843.8	50693.9	64524.2	60445.6	61907.8	63079.9	60092.3	0.295748	0.633656
O35900	Lsm2	U6 snRNA-associated Sm-like protein LSm2 OS=Mus musculus GN=Lsm2 PE=3 SV=1	473633	418116	427300	450959	389904	438449	424883	440937	451057	413334	0.0563034	0.932527
O35904	Pik3cd	"Phosphatidylinositol 4,5-bisphosphate 3-kinase catalytic subunit delta isoform OS=Mus musculus GN=Pik3cd PE=1 SV=2"	170983	132642	160815	184002	138515	148069	133486	151015	118335	131366	-0.429613	0.193183
O35929	Rem1	GTP-binding protein REM 1 OS=Mus musculus GN=Rem1 PE=1 SV=1	247851	284798	303709	310789	225845	196385	203404	220572	228665	197639	-0.789959	0.0239954
O35930	Gp1ba	Platelet glycoprotein Ib alpha chain OS=Mus musculus GN=Gp1ba PE=2 SV=2	234639	236773	230489	220298	237534	214869	230912	224528	229126	222589	-0.1109	0.434767
O35943	Fxn	"Frataxin, mitochondrial OS=Mus musculus GN=Fxn PE=1 SV=1"	1.03489e+06	1.04306e+06	1.05318e+06	985801	936358	919904	1.02198e+06	953797	973054	895007	-0.19335	0.274567
O35945	Aldh1a7	"Aldehyde dehydrogenase, cytosolic 1 OS=Mus musculus GN=Aldh1a7 PE=2 SV=1"	2.99687e+07	3.20187e+07	2.93921e+07	3.14717e+07	3.47249e+07	3.73811e+07	4.31499e+07	3.79281e+07	3.33784e+07	3.51771e+07	0.382972	0.0506305
O35954	Pitpnm1	Membrane-associated phosphatidylinositol transfer protein 1 OS=Mus musculus GN=Pitpnm1 PE=1 SV=1	702391	689081	779855	692307	801207	614949	616101	724409	653160	667114	-0.175077	0.111621
O35955	Psmb10	Proteasome subunit beta type-10 OS=Mus musculus GN=Psmb10 PE=1 SV=1	749161	736095	860297	797255	736824	740928	723779	647519	691160	692686	-0.18765	0.104042
O35963	Rab33b	Ras-related protein Rab-33B OS=Mus musculus GN=Rab33b PE=1 SV=1	1.53776e+06	1.58192e+06	1.39421e+06	1.81618e+06	1.37756e+06	1.47029e+06	1.51992e+06	1.46704e+06	1.41622e+06	1.50782e+06	-0.103563	0.615402
O35969-2	Gamt	Isoform 2 of Guanidinoacetate N-methyltransferase OS=Mus musculus GN=Gamt	4.87718e+06	5.53856e+06	5.15662e+06	6.26569e+06	6.11115e+06	6.6658e+06	6.77508e+06	6.59181e+06	6.64873e+06	6.59186e+06	0.405612	0.0348693
O35972	Mrpl23	"39S ribosomal protein L23, mitochondrial OS=Mus musculus GN=Mrpl23 PE=2 SV=1"	383921	441053	407715	295237	438009	399105	433233	410988	411964	445241	0.0103759	0.470357
O35973	Per1	Period circadian protein homolog 1 OS=Mus musculus GN=Per1 PE=1 SV=2	130519	134422	117226	157248	149612	145407	125242	151504	119057	129152	-0.0959863	0.799217
O35988	Sdc4	Syndecan-4 OS=Mus musculus GN=Sdc4 PE=1 SV=1	94765.5	64638.6	88984.7	71170.2	75076.5	109588	97325.4	91302.5	91146.2	82353.4	0.424114	0.127359
O54692	Zw10	Centromere/kinetochore protein zw10 homolog OS=Mus musculus GN=Zw10 PE=2 SV=3	2.65044e+06	3.27632e+06	2.46019e+06	3.79141e+06	2.59185e+06	2.8219e+06	2.73799e+06	2.7273e+06	2.63092e+06	2.71223e+06	0.0499976	0.557956
O54724	Ptrf	Polymerase I and transcript release factor OS=Mus musculus GN=Ptrf PE=1 SV=1	1.2248e+08	8.22395e+07	8.04903e+07	8.92572e+07	7.40638e+07	1.0502e+08	9.03423e+07	1.13634e+08	1.38643e+08	119366031	0.745205	0.124217
O54734	Ddost	Dolichyl-diphosphooligosaccharide--protein glycosyltransferase 48 kDa subunit OS=Mus musculus GN=Ddost PE=1 SV=2	9.67906e+06	6.22341e+06	9.29217e+06	6.76998e+06	7.51938e+06	8.4081e+06	7.82e+06	6.75751e+06	6.03521e+06	8.80597e+06	0.133916	0.815113
O54750	Cyp2j6	Cytochrome P450 2J6 OS=Mus musculus GN=Cyp2j6 PE=2 SV=2	236207	221172	269809	243525	254940	204685	188102	228491	219745	227393	-0.285821	0.0829643
O54754	Aox1	Aldehyde oxidase 1 OS=Mus musculus GN=Aox1 PE=1 SV=2	1.115e+07	1.11142e+07	9.58908e+06	1.14271e+07	1.06423e+07	1.10864e+07	1.20945e+07	1.07652e+07	1.20676e+07	1.08359e+07	-0.00261148	0.396551
O54774	Ap3d1	AP-3 complex subunit delta-1 OS=Mus musculus GN=Ap3d1 PE=1 SV=1	9.66813e+06	9.46132e+06	9.45434e+06	6.8376e+06	1.006e+07	1.19656e+07	1.16975e+07	1.09833e+07	1.08861e+07	1.08166e+07	0.316348	0.0516764
O54781	Srpk2	SRSF protein kinase 2 OS=Mus musculus GN=Srpk2 PE=1 SV=2	386376	392441	470410	232389	413325	497448	372423	435724	421469	489881	0.223888	0.308055
O54782	Man2b2	Epididymis-specific alpha-mannosidase OS=Mus musculus GN=Man2b2 PE=2 SV=2	1.67481e+06	1.54718e+06	2.43804e+06	1.50271e+06	1.53343e+06	1.29437e+06	1.58264e+06	1.37084e+06	1.5419e+06	1.3201e+06	-0.290081	0.174115
O54784	Dapk3	Death-associated protein kinase 3 OS=Mus musculus GN=Dapk3 PE=1 SV=1	1.07924e+06	1.0141e+06	1.1343e+06	1.0596e+06	1.2675e+06	1.10688e+06	1.18079e+06	1.07617e+06	1.14499e+06	1.03999e+06	0.0557639	0.990231
O54785	Limk2	Isoform 2 of LIM domain kinase 2 OS=Mus musculus GN=Limk2	407853	384451	443859	394065	447180	370331	357810	380950	383932	366888	-0.221699	0.0721644
O54786-2	Dffa	Isoform ICAD-S of DNA fragmentation factor subunit alpha OS=Mus musculus GN=Dffa	32130.6	36342.4	30892.1	45543.3	34126.2	34191.7	35064.5	33107.7	37452	34874.9	0.0359392	0.888382
O54794	Aqp7	Aquaporin-7 OS=Mus musculus GN=Aqp7 PE=2 SV=1	15862.4	14633.7	13000.3	14810.8	15147	14673	14626	12951	11669.2	13977.9	-0.188154	0.308055
O54818	Tpd52l1	Tumor protein D53 OS=Mus musculus GN=Tpd52l1 PE=2 SV=1	279069	262092	326453	276356	202180	218472	257252	190535	239629	191280	-0.556988	0.144576
O54824	Il16	Pro-interleukin-16 OS=Mus musculus GN=Il16 PE=1 SV=3	1.89299e+06	1.95932e+06	1.77796e+06	2.10752e+06	1.88657e+06	2.14828e+06	1.80185e+06	1.77745e+06	1.89077e+06	1.93334e+06	-0.0180804	0.912253
O54825	Bysl	Bystin OS=Mus musculus GN=Bysl PE=1 SV=3	85427.3	80272.9	86036.6	73256.8	80092.9	83827.3	76378.9	85917.3	81815.1	74245.1	0.0272254	0.920982
O54833	Csnk2a2	Casein kinase II subunit alpha' OS=Mus musculus GN=Csnk2a2 PE=2 SV=1	3.85444e+06	2.52576e+06	3.12908e+06	1.69589e+06	2.83128e+06	3.67247e+06	3.55616e+06	3.44589e+06	3.38162e+06	3.35783e+06	0.408315	0.178734
O54834	Arhgap6	Isoform 3 of Rho GTPase-activating protein 6 OS=Mus musculus GN=Arhgap6	42125.9	33732.3	43040.3	22687.9	40833.5	33729.2	36137.8	41674.4	34192	37922	-0.284339	0.87088
O54865	Gucy1b3	Guanylate cyclase soluble subunit beta-1 OS=Mus musculus GN=Gucy1b3 PE=2 SV=1	5.05283e+06	5.0057e+06	5.01177e+06	4.92356e+06	5.19468e+06	5.57119e+06	5.34946e+06	5.21072e+06	4.72711e+06	5.24332e+06	0.0993676	0.499366
O54879	Hmgb3	High mobility group protein B3 OS=Mus musculus GN=Hmgb3 PE=2 SV=3	1.05455e+06	901162	709492	902685	452061	1.37777e+06	1.23073e+06	601894	955014	816944	0.117991	0.435883
O54890	Itgb3	Integrin beta-3 OS=Mus musculus GN=Itgb3 PE=1 SV=2	1.32127e+06	1.22525e+06	1.28521e+06	1.25078e+06	1.27649e+06	1.24485e+06	975698	1.30885e+06	1.21711e+06	1.38886e+06	-0.0654418	0.633237
O54901	Cd200	OX-2 membrane glycoprotein OS=Mus musculus GN=Cd200 PE=1 SV=1	559583	597879	563996	589558	599382	564422	591396	559858	546302	575897	-0.129397	0.564306
O54905	B3galt2	"Beta-1,3-galactosyltransferase 2 OS=Mus musculus GN=B3galt2 PE=2 SV=2"	1.21404e+06	1.26038e+06	1.14153e+06	1.19438e+06	1.15584e+06	1.30287e+06	1.33728e+06	1.23418e+06	1.20235e+06	1.20006e+06	0.038767	0.317186
O54916	Reps1	RalBP1-associated Eps domain-containing protein 1 OS=Mus musculus GN=Reps1 PE=1 SV=2	542973	506615	567479	566996	532758	499674	457093	501486	517239	468616	-0.188599	0.0704774
O54931-2	Akap2	Isoform 2 of A-kinase anchor protein 2 OS=Mus musculus GN=Akap2	73107.5	54813.5	67289.6	50113	82239.9	83931.3	84026.3	76199.1	87800.3	92477.4	0.51136	0.0594714
O54931-3	Akap2	Isoform 3 of A-kinase anchor protein 2 OS=Mus musculus GN=Akap2	57856.3	68130.5	109949	68058.1	106392	62170.4	87083.8	72521.7	72164.3	69833.1	0.13735	0.627546
O54940	Bnip2	BCL2/adenovirus E1B 19 kDa protein-interacting protein 2 OS=Mus musculus GN=Bnip2 PE=1 SV=2	487581	533977	490349	417198	523558	517886	522999	517165	498386	563745	0.122367	0.332908
O54941	Smarce1	SWI/SNF-related matrix-associated actin-dependent regulator of chromatin subfamily E member 1 OS=Mus musculus GN=Smarce1 PE=1 SV=1	881049	761351	906199	725091	826470	710824	674568	757124	776483	739397	-0.26207	0.13891
O54946	Dnajb6	DnaJ homolog subfamily B member 6 OS=Mus musculus GN=Dnajb6 PE=1 SV=4	878714	624201	861439	584763	773892	775321	830691	759217	855208	745835	-0.00412823	0.527387
O54950	Prkag1	5'-AMP-activated protein kinase subunit gamma-1 OS=Mus musculus GN=Prkag1 PE=1 SV=2	3.40036e+06	3.2115e+06	3.33583e+06	2.91638e+06	3.42316e+06	4.03205e+06	4.05869e+06	3.61179e+06	3.6141e+06	3.77073e+06	0.274407	0.0307288
O54962	Banf1	Barrier-to-autointegration factor OS=Mus musculus GN=Banf1 PE=1 SV=1	2.10698e+06	2.05936e+06	1.55811e+06	1.78397e+06	1.321e+06	2.31124e+06	2.29631e+06	2.01718e+06	1.87438e+06	2.01632e+06	0.274961	0.164777
O54974	Lgals7	Galectin-7 OS=Mus musculus GN=Lgals7 PE=2 SV=3	1.27522e+06	1.37368e+06	1.26095e+06	1.27801e+06	1.96884e+06	1.11482e+06	1.03708e+06	1.3348e+06	1.31355e+06	1.38555e+06	0.0382614	0.319345
O54983	Crym	Ketimine reductase mu-crystallin OS=Mus musculus GN=Crym PE=1 SV=1	172260	221876	240814	293238	317963	172788	214086	209016	272194	177244	-0.330802	0.352116
O54984	Asna1	ATPase Asna1 OS=Mus musculus GN=Asna1 PE=1 SV=2	6.11022e+06	6.50546e+06	6.12446e+06	6.8476e+06	6.61813e+06	5.91166e+06	6.48611e+06	5.77975e+06	6.08926e+06	6.13015e+06	-0.156485	0.267294
O54988-2	Slk	Isoform 2 of STE20-like serine/threonine-protein kinase OS=Mus musculus GN=Slk	6.40693e+06	6.05392e+06	5.9728e+06	6.13885e+06	5.58457e+06	6.4283e+06	6.71188e+06	6.0335e+06	6.84699e+06	6.99323e+06	0.239905	0.127086
O54992	Mapkapk5	Isoform 5 of MAP kinase-activated protein kinase 5 OS=Mus musculus GN=Mapkapk5	449117	350046	352379	301477	351034	406005	392969	361330	379002	423492	0.244164	0.345704
O54998	Fkbp7	Peptidyl-prolyl cis-trans isomerase FKBP7 OS=Mus musculus GN=Fkbp7 PE=1 SV=1	3.16368e+06	3.35009e+06	3.34694e+06	3.81419e+06	3.40328e+06	3.75711e+06	3.98225e+06	3.63692e+06	3.45978e+06	3.51195e+06	0.168059	0.245786
O55003	Bnip3	BCL2/adenovirus E1B 19 kDa protein-interacting protein 3 OS=Mus musculus GN=Bnip3 PE=1 SV=1	3.34713e+06	4.47879e+06	3.5138e+06	4.53687e+06	4.46374e+06	4.04823e+06	4.89307e+06	3.91173e+06	3.73034e+06	4.45625e+06	-0.224912	0.75222
O55013	Trappc3	Trafficking protein particle complex subunit 3 OS=Mus musculus GN=Trappc3 PE=1 SV=1	3.77954e+06	3.76986e+06	3.67525e+06	3.606e+06	3.79335e+06	3.72548e+06	3.56814e+06	3.69383e+06	3.57705e+06	3.66952e+06	-0.0605215	0.590556
O55022	Pgrmc1	Membrane-associated progesterone receptor component 1 OS=Mus musculus GN=Pgrmc1 PE=1 SV=4	6.0769e+06	6.4407e+06	6.79572e+06	6.48752e+06	6.75308e+06	5.38318e+06	5.33168e+06	6.28531e+06	5.97495e+06	5.97028e+06	-0.236536	0.0715976
O55023	Impa1	Inositol monophosphatase 1 OS=Mus musculus GN=Impa1 PE=1 SV=1	7.00724e+06	6.95855e+06	6.8582e+06	7.70479e+06	5.19812e+06	5.84626e+06	6.0713e+06	5.89872e+06	6.46984e+06	6.40856e+06	-0.313797	0.370051
O55026	Entpd2	Ectonucleoside triphosphate diphosphohydrolase 2 OS=Mus musculus GN=Entpd2 PE=1 SV=2	9.69635e+06	8.2865e+06	1.16529e+07	9.16058e+06	6.98983e+06	7.51224e+06	8.35335e+06	7.83373e+06	8.40205e+06	7.34716e+06	-0.410192	0.259796
O55028	Bckdk	"[3-methyl-2-oxobutanoate dehydrogenase [lipoamide]] kinase, mitochondrial OS=Mus musculus GN=Bckdk PE=1 SV=1"	1.17916e+06	1.197e+06	1.02516e+06	1.1438e+06	1.24437e+06	1.15363e+06	1.09003e+06	1.16652e+06	1.09454e+06	1.19119e+06	-0.047897	0.817812
O55029	Copb2	Coatomer subunit beta' OS=Mus musculus GN=Copb2 PE=2 SV=2	9.27885e+06	8.33788e+06	8.73376e+06	6.26503e+06	8.35624e+06	1.14307e+07	1.18288e+07	9.75766e+06	9.7167e+06	1.04284e+07	0.47804	0.0363645
O55033	Nck2	Cytoplasmic protein NCK2 OS=Mus musculus GN=Nck2 PE=1 SV=1	1.81542e+06	1.71165e+06	1.62116e+06	1.74673e+06	1.56167e+06	1.78176e+06	1.87439e+06	1.61343e+06	1.69568e+06	1.71158e+06	0.00054555	0.670256
O55042	Snca	Isoform 2 of Alpha-synuclein OS=Mus musculus GN=Snca	1.97209e+06	2.55172e+06	2.54479e+06	2.4914e+06	2.43605e+06	2.26351e+06	3.03694e+06	2.24812e+06	2.35042e+06	2.6809e+06	-0.173737	0.674706
O55055	Trdmt1	tRNA (cytosine(38)-C(5))-methyltransferase OS=Mus musculus GN=Trdmt1 PE=2 SV=2	232232	226684	240657	258455	221235	213993	203153	220226	212451	214228	-0.187411	0.0744612
O55060	Tpmt	Thiopurine S-methyltransferase OS=Mus musculus GN=Tpmt PE=1 SV=1	4.66845e+06	4.38454e+06	4.59306e+06	5.00502e+06	3.99777e+06	4.31909e+06	4.52549e+06	4.21182e+06	4.50558e+06	4.0618e+06	-0.137217	0.496023
O55091	Impact	Protein IMPACT OS=Mus musculus GN=Impact PE=1 SV=2	432515	413008	390151	423884	385157	441917	453525	448579	440750	447449	0.177804	0.0768304
O55098	Stk10	Serine/threonine-protein kinase 10 OS=Mus musculus GN=Stk10 PE=1 SV=2	1.25296e+06	1.24847e+06	1.18456e+06	1.41809e+06	1.35809e+06	1.26852e+06	1.39275e+06	1.11224e+06	1.23155e+06	1.25675e+06	0.00212566	0.663995
O55102	Bloc1s1	Biogenesis of lysosome-related organelles complex 1 subunit 1 OS=Mus musculus GN=Bloc1s1 PE=1 SV=2	556686	597795	528553	491172	548025	672298	658588	607327	630240	631916	0.308446	0.0243251
O55106	Strn	Striatin OS=Mus musculus GN=Strn PE=1 SV=2	2.90544e+06	2.71883e+06	2.99493e+06	2.6449e+06	3.05324e+06	2.47582e+06	2.43974e+06	2.79934e+06	2.66628e+06	2.55711e+06	-0.290817	0.107739
O55125	Nipsnap1	Protein NipSnap homolog 1 OS=Mus musculus GN=Nipsnap1 PE=1 SV=1	1.67123e+06	1.41407e+06	2.11983e+06	1.68342e+06	1.17731e+06	1.1734e+06	1.32735e+06	1.07423e+06	1.40866e+06	1.25964e+06	-0.638089	0.114055
O55126	Gbas	Protein NipSnap homolog 2 OS=Mus musculus GN=Gbas PE=2 SV=1	3.71048e+06	4.10091e+06	3.63394e+06	4.29283e+06	3.14383e+06	3.75948e+06	3.9518e+06	3.54389e+06	3.57977e+06	3.98871e+06	0.0271729	0.988595
O55128	Sap18	Histone deacetylase complex subunit SAP18 OS=Mus musculus GN=Sap18 PE=1 SV=1	320220	224432	300500	168938	248892	230687	226773	231874	291686	200496	-0.185461	0.788406
O55131	Sep-07	Septin-7 OS=Mus musculus GN=Sept7 PE=1 SV=1	1.13564e+07	9.02127e+06	8.91855e+06	9.87723e+06	8.41149e+06	1.29213e+07	1.17148e+07	1.07934e+07	1.03426e+07	1.09176e+07	0.451795	0.0751655
O55135	Eif6	Eukaryotic translation initiation factor 6 OS=Mus musculus GN=Eif6 PE=1 SV=2	327933	352853	336228	304417	319041	317185	329191	322274	332427	315898	-0.0527843	0.79951
O55137	Acot1	Acyl-coenzyme A thioesterase 1 OS=Mus musculus GN=Acot1 PE=1 SV=1	729726	461186	655172	517295	398626	447660	415233	370986	396930	513187	-0.577659	0.166492
O55142	Rpl35a	60S ribosomal protein L35a OS=Mus musculus GN=Rpl35a PE=1 SV=2	660593	506920	828373	635911	792940	682447	693004	714360	729077	667781	0.00933289	0.803371
O55143	Atp2a2	Sarcoplasmic/endoplasmic reticulum calcium ATPase 2 OS=Mus musculus GN=Atp2a2 PE=1 SV=2	2.05301e+07	1.94168e+07	1.93807e+07	2.07575e+07	18648049	2.2562e+07	2.36006e+07	2.03744e+07	2.12325e+07	2.14162e+07	0.221668	0.0865256
O55186	Cd59a	CD59A glycoprotein OS=Mus musculus GN=Cd59a PE=2 SV=1	1.92156e+06	1.33768e+06	1.19278e+06	1.70143e+06	1.23643e+06	1.77283e+06	2.03183e+06	1.84563e+06	1.83978e+06	1.77078e+06	0.748873	0.084365
O55201	Supt5h	Transcription elongation factor SPT5 OS=Mus musculus GN=Supt5h PE=1 SV=1	2.67108e+06	1.96203e+06	2.69413e+06	1.51317e+06	2.52034e+06	2.24252e+06	2.22618e+06	2.27103e+06	2.4282e+06	2.14385e+06	-0.258419	0.915991
O55222	Ilk	Integrin-linked protein kinase OS=Mus musculus GN=Ilk PE=1 SV=2	1.88676e+07	1.7777e+07	1.74854e+07	1.87358e+07	1.88155e+07	2.01139e+07	1.99756e+07	1.99528e+07	1.94479e+07	2.06867e+07	0.132895	0.0600742
O55229	Chkb	Choline/ethanolamine kinase OS=Mus musculus GN=Chkb PE=1 SV=3	1.22849e+06	1.22472e+06	1.37392e+06	1.22718e+06	1.34566e+06	1.20442e+06	1.13006e+06	1.21073e+06	1.26902e+06	1.19534e+06	-0.072474	0.246032
O55234	Psmb5	Proteasome subunit beta type-5 OS=Mus musculus GN=Psmb5 PE=1 SV=3	5.44578e+06	5.24741e+06	5.14591e+06	5.70549e+06	5.11233e+06	6.03705e+06	5.89795e+06	6.12835e+06	5.44467e+06	5.51341e+06	0.272688	0.129992
O55236	Rngtt	mRNA-capping enzyme OS=Mus musculus GN=Rngtt PE=1 SV=1	273431	264632	256966	310283	286306	237606	226369	246560	236361	242915	-0.32819	0.0281681
O55239	Nnmt	Nicotinamide N-methyltransferase OS=Mus musculus GN=Nnmt PE=1 SV=1	3.78783e+06	4.359e+06	3.93579e+06	4.6092e+06	3.85421e+06	4.29327e+06	4.58365e+06	4.64244e+06	4.33978e+06	4.0535e+06	0.204522	0.332961
O55242	Sigmar1	Sigma non-opioid intracellular receptor 1 OS=Mus musculus GN=Sigmar1 PE=1 SV=1	3.20215e+06	3.43312e+06	2.97975e+06	3.97824e+06	3.60143e+06	3.6221e+06	3.68945e+06	3.67747e+06	3.57989e+06	3.48691e+06	0.126423	0.470306
O70133-2	Dhx9	Isoform 2 of ATP-dependent RNA helicase A OS=Mus musculus GN=Dhx9	1.06571e+07	6.29709e+06	1.0506e+07	4.8065e+06	8.69485e+06	8.48975e+06	8.09236e+06	8.03544e+06	9.32395e+06	7.42152e+06	-0.167003	0.818007
O70145	Ncf2	Neutrophil cytosol factor 2 OS=Mus musculus GN=Ncf2 PE=1 SV=1	549526	545791	525196	602586	536388	603593	581069	503510	550173	531516	0.0103233	0.970595
O70152	Dpm1	Dolichol-phosphate mannosyltransferase subunit 1 OS=Mus musculus GN=Dpm1 PE=2 SV=1	2.57575e+06	2.81741e+06	2.85707e+06	3.012e+06	3.06366e+06	2.55794e+06	2.71415e+06	2.95582e+06	2.84284e+06	2.72553e+06	-0.109926	0.549907
O70161-3	Pip5k1c	Isoform 2 of Phosphatidylinositol 4-phosphate 5-kinase type-1 gamma OS=Mus musculus GN=Pip5k1c	210462	144349	204795	182036	162162	162683	153729	157870	169214	151412	-0.38292	0.24301
O70165	Fcn1	Ficolin-1 OS=Mus musculus GN=Fcn1 PE=1 SV=1	581465	591501	605303	519726	627344	615703	576576	744957	608210	661930	0.0959475	0.25466
O70172	Pip4k2a	Phosphatidylinositol 5-phosphate 4-kinase type-2 alpha OS=Mus musculus GN=Pip4k2a PE=1 SV=1	835124	855805	949066	1.05435e+06	844873	730359	835331	719679	730117	817371	-0.370115	0.058872
O70194	Eif3d	Eukaryotic translation initiation factor 3 subunit D OS=Mus musculus GN=Eif3d PE=1 SV=2	3.83948e+06	3.78443e+06	3.98261e+06	2.57325e+06	3.94528e+06	4.55088e+06	4.61372e+06	4.14017e+06	4.32245e+06	4.10734e+06	0.244043	0.116261
O70209	Pdlim3	PDZ and LIM domain protein 3 OS=Mus musculus GN=Pdlim3 PE=1 SV=1	2.9736e+06	2.0465e+06	2.04243e+06	2.2024e+06	1.86025e+06	2.27782e+06	2.65238e+06	2.33203e+06	2.29834e+06	2.2776e+06	0.228042	0.527387
O70228	Atp9a	Probable phospholipid-transporting ATPase IIA OS=Mus musculus GN=Atp9a PE=2 SV=3	700181	762004	618482	844364	662912	1.01513e+06	903971	880085	875249	938128	0.587992	0.0185991
O70230-2	Znf143	Isoform 2 of Zinc finger protein 143 OS=Mus musculus GN=Znf143	413432	316918	392059	306515	412224	309454	299679	328256	332987	347926	-0.393608	0.218855
O70251	Eef1b	Elongation factor 1-beta OS=Mus musculus GN=Eef1b PE=1 SV=5	4.68759e+06	5.22016e+06	4.19044e+06	4.84557e+06	4.085e+06	7.1787e+06	7.84366e+06	5.66088e+06	5.77624e+06	6.08163e+06	0.596107	0.0156317
O70252	Hmox2	Heme oxygenase 2 OS=Mus musculus GN=Hmox2 PE=2 SV=1	4.28467e+06	4.38484e+06	3.95993e+06	5.22791e+06	3.84464e+06	4.4625e+06	4.65671e+06	4.26735e+06	4.30983e+06	4.33152e+06	0.0193445	0.815132
O70258-2	Sgce	Isoform 2 of Epsilon-sarcoglycan OS=Mus musculus GN=Sgce	2.66372e+06	2.70024e+06	2.45465e+06	2.7566e+06	2.69773e+06	2.97093e+06	3.24063e+06	2.8541e+06	3.01853e+06	3.04036e+06	0.240125	0.032566
O70263	Lnx1	Isoform 2 of E3 ubiquitin-protein ligase LNX OS=Mus musculus GN=Lnx1	187918	195580	222051	205859	212866	203736	185052	203998	208647	189797	-0.0694189	0.598494
O70274	Ptp4a2	Protein tyrosine phosphatase type IVA 2 OS=Mus musculus GN=Ptp4a2 PE=1 SV=1	709705	976274	907822	1.16696e+06	939792	927014	823766	863008	860410	818772	-0.215882	0.484493
O70293-2	Grk6	Isoform GRK6B of G protein-coupled receptor kinase 6 OS=Mus musculus GN=Grk6	400559	460726	428361	511639	419007	474979	470537	483775	475848	501137	0.232235	0.215795
O70305	Atxn2	Isoform 2 of Ataxin-2 OS=Mus musculus GN=Atxn2	1.29757e+06	1.28575e+06	1.44488e+06	1.305e+06	1.42066e+06	1.10448e+06	1.24075e+06	1.17037e+06	1.29834e+06	1.13714e+06	-0.298514	0.0603224
O70309	Itgb5	Isoform Beta-5B of Integrin beta-5 OS=Mus musculus GN=Itgb5	1.54031e+06	1.6752e+06	1.4426e+06	1.75993e+06	1.7842e+06	2.31928e+06	1.60817e+06	1.90294e+06	1.99935e+06	2.07252e+06	0.38785	0.0858941
O70310	Nmt1	Glycylpeptide N-tetradecanoyltransferase 1 OS=Mus musculus GN=Nmt1 PE=1 SV=1	3.67309e+06	4.73384e+06	4.13218e+06	4.77754e+06	4.72542e+06	4.49938e+06	5.05063e+06	4.59503e+06	4.60565e+06	4.63189e+06	-0.0717725	0.426697
O70311	Nmt2	Glycylpeptide N-tetradecanoyltransferase 2 OS=Mus musculus GN=Nmt2 PE=2 SV=1	718829	786585	640494	888048	698180	670810	686416	689024	680881	666246	-0.133622	0.271616
O70318	Epb41l2	Band 4.1-like protein 2 OS=Mus musculus GN=Epb41l2 PE=1 SV=2	3.19868e+07	3.15182e+07	3.00978e+07	3.03494e+07	3.21214e+07	3.78534e+07	4.06996e+07	3.73319e+07	3.64876e+07	3.79582e+07	0.426414	0.00540751
O70325	Gpx4	"Isoform Cytoplasmic of Phospholipid hydroperoxide glutathione peroxidase, mitochondrial OS=Mus musculus GN=Gpx4"	2.23269e+07	2.21162e+07	1.89378e+07	2.45629e+07	2.24082e+07	2.45856e+07	2.55357e+07	2.37391e+07	2.29983e+07	2.31984e+07	0.121249	0.214393
O70362	Gpld1	Phosphatidylinositol-glycan-specific phospholipase D OS=Mus musculus GN=Gpld1 PE=1 SV=1	1.41708e+06	1.61917e+06	1.51212e+06	1.49832e+06	1.50827e+06	1.80655e+06	1.67126e+06	1.68773e+06	1.61298e+06	1.78994e+06	0.22961	0.0393999
O70370	Ctss	Cathepsin S OS=Mus musculus GN=Ctss PE=1 SV=2	2.16949e+06	2.07229e+06	2.45572e+06	2.61519e+06	1.71089e+06	2.14253e+06	2.03957e+06	1.64302e+06	1.94917e+06	1.68841e+06	-0.246852	0.231192
O70378	Emc8	ER membrane protein complex subunit 8 OS=Mus musculus GN=Emc8 PE=1 SV=1	2.50104e+06	2.70938e+06	2.7081e+06	2.81667e+06	2.9684e+06	2.46908e+06	2.61512e+06	2.74116e+06	2.62407e+06	2.64646e+06	-0.0812426	0.419332
O70400	Pdlim1	PDZ and LIM domain protein 1 OS=Mus musculus GN=Pdlim1 PE=2 SV=4	1.0305e+07	9.87744e+06	1.04765e+07	1.17583e+07	1.16999e+07	1.21439e+07	1.20494e+07	1.21882e+07	1.1148e+07	1.14254e+07	0.31403	0.169687
O70401	Tspan6	Tetraspanin-6 OS=Mus musculus GN=Tspan6 PE=1 SV=1	84741.4	88004	93946.9	111058	78743.2	92331.4	101572	85418.3	101485	87558.9	0.116021	0.767537
O70404	Vamp8	Vesicle-associated membrane protein 8 OS=Mus musculus GN=Vamp8 PE=1 SV=1	713679	649049	790300	745631	677389	642841	674172	619028	660867	680213	-0.181613	0.17308
O70423	Aoc3	Membrane primary amine oxidase OS=Mus musculus GN=Aoc3 PE=2 SV=3	1.99222e+08	1.90231e+08	1.91831e+08	2.01774e+08	2.21747e+08	2.09135e+08	1.90163e+08	2.3081e+08	2.04582e+08	2.59008e+08	0.0757389	0.345746
O70433	Fhl2	Four and a half LIM domains protein 2 OS=Mus musculus GN=Fhl2 PE=1 SV=1	433925	433751	386023	364727	316322	529712	462164	428775	422013	414773	0.221337	0.140559
O70435	Psma3	Proteasome subunit alpha type-3 OS=Mus musculus GN=Psma3 PE=1 SV=3	9.83407e+06	9.59713e+06	8.9671e+06	9.01009e+06	8.4243e+06	1.14001e+07	1.03488e+07	1.01185e+07	1.00051e+07	9.775e+06	0.242573	0.0713458
O70439	Stx7	Syntaxin-7 OS=Mus musculus GN=Stx7 PE=1 SV=3	1.1832e+06	1.12177e+06	1.38301e+06	1.17032e+06	1.18013e+06	1.04629e+06	1.07154e+06	1.10813e+06	1.19239e+06	1.16973e+06	-0.164426	0.253846
O70451	Slc16a7	Monocarboxylate transporter 2 OS=Mus musculus GN=Slc16a7 PE=1 SV=1	317620	347045	273487	350644	314011	396643	335664	372826	362863	364150	0.312755	0.0932341
O70458-2	Osmr	Isoform 2 of Oncostatin-M-specific receptor subunit beta OS=Mus musculus GN=Osmr	82810.3	76635	77454.2	88507.1	70285.6	86265.3	91086.7	76083.7	81061	77916.4	0.0903876	0.578294
O70469	Dok2	Docking protein 2 OS=Mus musculus GN=Dok2 PE=1 SV=1	343207	324232	367247	349268	536940	468340	592434	346810	339011	574910	0.476977	0.364756
O70475	Ugdh	UDP-glucose 6-dehydrogenase OS=Mus musculus GN=Ugdh PE=1 SV=1	1.00315e+07	9.55493e+06	9.2582e+06	1.08037e+07	8.29502e+06	1.21736e+07	1.0746e+07	8.91216e+06	1.032e+07	9.58559e+06	0.164323	0.435291
O70481	Ubr1	E3 ubiquitin-protein ligase UBR1 OS=Mus musculus GN=Ubr1 PE=1 SV=2	1.98331e+06	1.8844e+06	2.03358e+06	1.96208e+06	1.93505e+06	1.99975e+06	1.91922e+06	2.02917e+06	1.9773e+06	1.85551e+06	-0.0193572	0.970712
O70492	Snx3	Sorting nexin-3 OS=Mus musculus GN=Snx3 PE=1 SV=3	8.3455e+06	8.93092e+06	7.28881e+06	8.93174e+06	6.93594e+06	1.01966e+07	1.00814e+07	8.81112e+06	8.19849e+06	8.66386e+06	0.106115	0.182167
O70493	Snx12	Sorting nexin-12 OS=Mus musculus GN=Snx12 PE=1 SV=1	3.31307e+06	2.92022e+06	2.98283e+06	3.04854e+06	2.63265e+06	3.64536e+06	3.47625e+06	3.27912e+06	3.39172e+06	3.43504e+06	0.315603	0.0438628
O70494-3	Sp3	Isoform 3 of Transcription factor Sp3 OS=Mus musculus GN=Sp3	353365	329191	298306	321020	259058	318343	389389	296415	393150	316718	-0.0454663	0.393338
O70496	Clcn7	H(+)/Cl(-) exchange transporter 7 OS=Mus musculus GN=Clcn7 PE=1 SV=1	360732	561521	387450	749833	445393	453208	427329	519767	434214	528702	0.0156796	0.905175
O70503	Hsd17b12	Estradiol 17-beta-dehydrogenase 12 OS=Mus musculus GN=Hsd17b12 PE=2 SV=1	1.08331e+07	1.37609e+07	1.12168e+07	1.16392e+07	1.3622e+07	1.40653e+07	1.41117e+07	1.32684e+07	1.32389e+07	1.41392e+07	0.438065	0.119861
O70546	Kdm6a	Isoform 2 of Lysine-specific demethylase 6A OS=Mus musculus GN=Kdm6a	27315.5	20506.7	23064.5	15646.5	18546.7	25984.8	25269.2	20614.9	24918.5	24934.9	0.495681	0.244964
O70551	Srpk1	SRSF protein kinase 1 OS=Mus musculus GN=Srpk1 PE=1 SV=2	258773	247383	218062	252963	273104	257086	287390	234330	252915	246847	-0.0416127	0.771851
O70566	Diaph2	Protein diaphanous homolog 2 OS=Mus musculus GN=Diaph2 PE=1 SV=2	6.71745e+06	7.02028e+06	6.53788e+06	7.28347e+06	6.47485e+06	7.7114e+06	7.6605e+06	6.94662e+06	7.23529e+06	7.42845e+06	0.224762	0.122504
O70572	Smpd2	Sphingomyelin phosphodiesterase 2 OS=Mus musculus GN=Smpd2 PE=1 SV=1	4.94794e+06	4.57271e+06	4.31591e+06	4.78823e+06	4.17382e+06	5.42075e+06	5.77089e+06	4.77937e+06	5.18696e+06	5.30258e+06	0.342512	0.0504711
O70579	Slc25a17	Peroxisomal membrane protein PMP34 OS=Mus musculus GN=Slc25a17 PE=2 SV=1	919792	1.11177e+06	990492	1.20899e+06	1.0629e+06	1.36728e+06	1.51219e+06	1.21452e+06	1.15607e+06	1.2457e+06	0.34705	0.0530085
O70585	Dtnb	Dystrobrevin beta OS=Mus musculus GN=Dtnb PE=1 SV=3	380952	315069	446463	303830	441824	274269	321121	348234	384704	346337	-0.21141	0.395998
O70589-4	Cask	Isoform 3 of Peripheral plasma membrane protein CASK OS=Mus musculus GN=Cask	2.80068e+06	2.59195e+06	2.77895e+06	2.06671e+06	2.48018e+06	3.03206e+06	3.20188e+06	2.83696e+06	2.95218e+06	2.96838e+06	0.313795	0.0658165
O70591	Pfdn2	Prefoldin subunit 2 OS=Mus musculus GN=Pfdn2 PE=2 SV=2	2.60299e+06	2.67439e+06	2.6254e+06	3.29499e+06	2.68661e+06	2.59995e+06	2.4754e+06	2.61654e+06	2.39329e+06	2.40081e+06	-0.18247	0.162938
O70622-2	Rtn2	Isoform 2 of Reticulon-2 OS=Mus musculus GN=Rtn2	1.43238e+06	1.45811e+06	1.33371e+06	1.56328e+06	1.3712e+06	1.97355e+06	2.03925e+06	1.85166e+06	2.14659e+06	1.71625e+06	0.725792	0.00540751
O70628	Pde9a	"High affinity cGMP-specific 3',5'-cyclic phosphodiesterase 9A OS=Mus musculus GN=Pde9a PE=2 SV=1"	601802	636574	669630	804354	828735	476113	405675	602361	577827	648857	-0.332865	0.0788598
O88200	Clec11a	C-type lectin domain family 11 member A OS=Mus musculus GN=Clec11a PE=2 SV=1	45993.2	39219.3	39422.3	35059.5	44647.4	33898.4	32081	41567.7	32259	41320.8	-0.378757	0.244346
O88271	Cfdp1	Craniofacial development protein 1 OS=Mus musculus GN=Cfdp1 PE=1 SV=1	817939	675307	703999	478173	596850	769212	735316	705181	785018	740457	0.213738	0.238655
O88291-2	Znf326	Isoform 2 of DBIRD complex subunit ZNF326 OS=Mus musculus GN=Znf326	249334	192326	247758	158797	211082	245167	224840	231306	262231	227613	0.178725	0.284422
O88322	Nid2	Nidogen-2 OS=Mus musculus GN=Nid2 PE=1 SV=2	2.49772e+07	1.88434e+07	2.06703e+07	1.6631e+07	2.1558e+07	1.94461e+07	1.91733e+07	1.99668e+07	2.4475e+07	1.95728e+07	-0.128152	0.974567
O88327	Ctnnal1	Alpha-catulin OS=Mus musculus GN=Ctnnal1 PE=2 SV=1	479046	416942	495064	479601	472585	343862	394485	402500	426162	425317	-0.395727	0.0488859
O88338	Cdh16	Cadherin-16 OS=Mus musculus GN=Cdh16 PE=2 SV=1	578474	187170	532127	161605	124600	176092	336327	118617	353399	124535	-0.219563	0.613423
O88342	Wdr1	WD repeat-containing protein 1 OS=Mus musculus GN=Wdr1 PE=1 SV=3	2.8875e+07	2.84033e+07	2.66387e+07	2.83281e+07	2.73922e+07	3.08024e+07	2.92444e+07	2.82226e+07	2.59865e+07	2.80562e+07	-0.02476	0.753301
O88343	Slc4a4	Electrogenic sodium bicarbonate cotransporter 1 OS=Mus musculus GN=Slc4a4 PE=1 SV=2	551607	464008	651967	403758	516446	359149	406108	364234	471207	358565	-0.819066	0.0606102
O88351	Ikbkb	Inhibitor of nuclear factor kappa-B kinase subunit beta OS=Mus musculus GN=Ikbkb PE=1 SV=1	783567	816415	881460	697760	881381	871391	898517	869144	920539	874470	0.160316	0.186684
O88384	Vti1b	Vesicle transport through interaction with t-SNAREs homolog 1B OS=Mus musculus GN=Vti1b PE=1 SV=1	2.06919e+06	2.25164e+06	2.31223e+06	2.40025e+06	2.46084e+06	2.1998e+06	2.19141e+06	2.18369e+06	2.11228e+06	2.30101e+06	-0.123073	0.427137
O88393	Tgfbr3	Transforming growth factor beta receptor type 3 OS=Mus musculus GN=Tgfbr3 PE=1 SV=1	1.14364e+06	1.09944e+06	1.24664e+06	1.01231e+06	1.36247e+06	929880	983527	1.07064e+06	1.12962e+06	1.0083e+06	-0.293134	0.142206
O88413	Tulp3	Tubby-related protein 3 OS=Mus musculus GN=Tulp3 PE=1 SV=1	140806	112378	151596	141659	143914	113583	109006	99973.6	103736	102428	-0.743504	0.0147326
O88428	Papss2	Bifunctional 3'-phosphoadenosine 5'-phosphosulfate synthase 2 OS=Mus musculus GN=Papss2 PE=1 SV=2	3.95062e+06	4.04925e+06	4.24149e+06	4.50098e+06	4.47454e+06	3.66848e+06	3.5139e+06	3.99719e+06	3.84633e+06	3.87563e+06	-0.224801	0.0653325
O88441	Mtx2	Metaxin-2 OS=Mus musculus GN=Mtx2 PE=1 SV=1	5.82382e+06	6.00155e+06	5.29872e+06	6.00642e+06	5.9966e+06	4.62132e+06	4.84582e+06	4.56962e+06	4.8544e+06	5.55675e+06	-0.493714	0.025631
O88447	Klc1	Kinesin light chain 1 OS=Mus musculus GN=Klc1 PE=1 SV=3	4.11711e+06	4.18929e+06	3.66362e+06	4.31241e+06	3.74609e+06	5.33491e+06	5.36975e+06	4.52043e+06	4.58061e+06	4.89812e+06	0.391064	0.0201764
O88451	Rdh7	Retinol dehydrogenase 7 OS=Mus musculus GN=Rdh7 PE=2 SV=1	504511	516739	918041	634549	576790	316026	302759	366924	459709	365905	-1.10969	0.0163038
O88455	Dhcr7	7-dehydrocholesterol reductase OS=Mus musculus GN=Dhcr7 PE=2 SV=1	214891	298629	273297	343640	307889	280052	334955	260239	287374	282051	-0.131505	0.926208
O88456	Capns1	Calpain small subunit 1 OS=Mus musculus GN=Capns1 PE=2 SV=1	5.03316e+06	5.29722e+06	4.68336e+06	5.34331e+06	4.9992e+06	7.05125e+06	6.64778e+06	6.3522e+06	6.07215e+06	6.64209e+06	0.62752	0.00494071
O88487	Dync1i2	Cytoplasmic dynein 1 intermediate chain 2 OS=Mus musculus GN=Dync1i2 PE=1 SV=1	5.24888e+06	5.90128e+06	5.42686e+06	5.73721e+06	5.21057e+06	6.21466e+06	6.02668e+06	5.58436e+06	6.10082e+06	5.94899e+06	0.225319	0.133255
O88492	Plin4	Perilipin-4 OS=Mus musculus GN=Plin4 PE=1 SV=2	9.13048e+07	9.78848e+07	8.44614e+07	9.83345e+07	8.68423e+07	1.13535e+08	1.20652e+08	1.15677e+08	1.16692e+08	1.2229e+08	0.524986	0.00509185
O88502	Pde8a	"High affinity cAMP-specific and IBMX-insensitive 3',5'-cyclic phosphodiesterase 8A OS=Mus musculus GN=Pde8a PE=1 SV=1"	290614	296378	271492	294948	258089	306922	310298	290122	326961	276513	0.124957	0.276094
O88507	Cntfr	Ciliary neurotrophic factor receptor subunit alpha OS=Mus musculus GN=Cntfr PE=1 SV=2	168938	148460	153802	167037	138543	144479	154819	151133	150992	145330	-0.0525765	0.551737
O88512	Ap1g2	AP-1 complex subunit gamma-like 2 OS=Mus musculus GN=Ap1g2 PE=2 SV=2	231543	239383	244658	226125	244311	222807	229337	222341	210145	226958	-0.163256	0.159406
O88520	Shoc2	Leucine-rich repeat protein SHOC-2 OS=Mus musculus GN=Shoc2 PE=2 SV=2	634634	539735	534383	583693	459625	726051	741377	600678	649532	630642	0.419789	0.058872
O88522	Ikbkg	NF-kappa-B essential modulator OS=Mus musculus GN=Ikbkg PE=1 SV=2	2.10382e+06	2.02917e+06	1.71146e+06	1.47112e+06	2.06719e+06	2.3415e+06	2.35483e+06	1.94924e+06	2.07012e+06	2.1801e+06	0.164641	0.157889
O88531	Ppt1	Palmitoyl-protein thioesterase 1 OS=Mus musculus GN=Ppt1 PE=2 SV=2	6.94527e+06	7.03004e+06	7.85858e+06	8.7389e+06	5.61459e+06	5.69933e+06	6.65822e+06	5.80522e+06	8.61416e+06	6.4735e+06	-0.193783	0.545382
O88532	Zfr	Zinc finger RNA-binding protein OS=Mus musculus GN=Zfr PE=1 SV=2	1.62846e+06	1.63824e+06	1.56149e+06	1.27653e+06	1.65045e+06	1.50351e+06	1.49604e+06	1.4753e+06	1.48086e+06	1.44532e+06	-0.218436	0.563186
O88533	Ddc	Aromatic-L-amino-acid decarboxylase OS=Mus musculus GN=Ddc PE=2 SV=1	334758	255623	265151	233027	219379	273297	184027	214622	199649	199572	-0.578766	0.151252
O88543	Cops3	COP9 signalosome complex subunit 3 OS=Mus musculus GN=Cops3 PE=1 SV=3	5.66084e+06	5.75063e+06	5.47204e+06	5.18666e+06	5.47301e+06	6.13045e+06	6.36303e+06	5.99011e+06	6.1672e+06	6.14852e+06	0.244571	0.0316055
O88544	Cops4	COP9 signalosome complex subunit 4 OS=Mus musculus GN=Cops4 PE=1 SV=1	8.93065e+06	8.32639e+06	8.41809e+06	6.62246e+06	8.9531e+06	8.81956e+06	8.77245e+06	8.46489e+06	8.48272e+06	8.85088e+06	0.0938271	0.488051
O88545	Cops6	COP9 signalosome complex subunit 6 OS=Mus musculus GN=Cops6 PE=1 SV=1	5.52516e+06	5.67978e+06	5.49233e+06	4.72476e+06	5.81212e+06	6.11268e+06	6.20171e+06	5.90358e+06	5.69629e+06	5.96561e+06	0.170656	0.139201
O88569	Hnrnpa2b1	Heterogeneous nuclear ribonucleoproteins A2/B1 OS=Mus musculus GN=Hnrnpa2b1 PE=1 SV=2	3.55107e+07	3.10133e+07	3.57323e+07	2.61799e+07	3.35991e+07	3.09812e+07	3.00885e+07	2.83203e+07	3.18436e+07	2.86027e+07	-0.254797	0.406085
O88587	Comt	Isoform Soluble of Catechol O-methyltransferase OS=Mus musculus GN=Comt	1.0043e+07	1.15044e+07	1.04613e+07	1.12837e+07	1.24035e+07	1.17107e+07	1.19307e+07	1.12005e+07	1.12832e+07	1.20988e+07	0.0583491	0.453851
O88622	Parg	Poly(ADP-ribose) glycohydrolase OS=Mus musculus GN=Parg PE=1 SV=2	687270	668575	691259	765960	634285	697223	692373	664018	698943	681116	0.0150186	0.973448
O88627	Slc28a2	Sodium/nucleoside cotransporter 2 OS=Mus musculus GN=Slc28a2 PE=2 SV=2	146072	142229	178096	237954	214346	99056.2	102474	124366	125365	116722	-0.991159	0.0168172
O88630	Gosr1	Golgi SNAP receptor complex member 1 OS=Mus musculus GN=Gosr1 PE=1 SV=2	1.79933e+06	1.70178e+06	1.60163e+06	1.80191e+06	1.73133e+06	1.72275e+06	1.77388e+06	1.79948e+06	1.67965e+06	1.73424e+06	-0.00923882	0.859999
O88643	Pak1	Serine/threonine-protein kinase PAK 1 OS=Mus musculus GN=Pak1 PE=1 SV=1	309137	204293	274800	221494	175050	192488	189688	180670	226775	164753	-0.412205	0.196979
O88653	Lamtor3	Ragulator complex protein LAMTOR3 OS=Mus musculus GN=Lamtor3 PE=1 SV=1	636445	539237	533821	545071	512261	661681	662714	583685	536507	590807	0.213904	0.246032
O88662	Emp2	Epithelial membrane protein 2 OS=Mus musculus GN=Emp2 PE=2 SV=1	198630	165184	151334	176046	105170	120482	157775	156321	151190	122827	-0.20713	0.536367
O88665	Brd7	Bromodomain-containing protein 7 OS=Mus musculus GN=Brd7 PE=1 SV=1	43731.7	36828.1	46691.3	53658.6	43997.3	41266.6	31606.8	43552.5	41959.2	37227.8	-0.156156	0.228577
O88667	Rrad	GTP-binding protein RAD OS=Mus musculus GN=Rrad PE=1 SV=1	444793	455089	798653	576444	643618	227712	231817	431738	346881	300622	-1.66687	0.0182688
O88668	Creg1	Protein CREG1 OS=Mus musculus GN=Creg1 PE=2 SV=1	1.56904e+06	1.52033e+06	1.49621e+06	2.02373e+06	1.17266e+06	1.14198e+06	1.26993e+06	1.16757e+06	1.24474e+06	1.10299e+06	-0.611327	0.058872
O88685	Psmc3	26S protease regulatory subunit 6A OS=Mus musculus GN=Psmc3 PE=1 SV=2	1.4358e+07	1.40243e+07	1.57531e+07	1.37196e+07	1.48438e+07	1.50173e+07	15138848	1.43374e+07	1.45538e+07	1.50265e+07	0.100244	0.695721
O88696	Clpp	"ATP-dependent Clp protease proteolytic subunit, mitochondrial OS=Mus musculus GN=Clpp PE=1 SV=1"	4.16763e+06	4.68828e+06	4.03402e+06	4.16817e+06	4.15004e+06	3.52448e+06	3.48036e+06	3.68787e+06	3.63668e+06	3.84364e+06	-0.313661	0.0212547
O88697	Stk16	Serine/threonine-protein kinase 16 OS=Mus musculus GN=Stk16 PE=1 SV=3	122177	155705	64766.4	266014	126720	132240	115772	134623	170587	129453	0.0755943	0.960508
O88712-2	Ctbp1	Isoform 2 of C-terminal-binding protein 1 OS=Mus musculus GN=Ctbp1	2.5123e+06	2.69084e+06	2.91339e+06	2.62119e+06	2.69287e+06	2.44342e+06	2.56524e+06	2.50345e+06	2.48929e+06	2.54974e+06	-0.172768	0.176952
O88735-2	Map7	Isoform 2 of Ensconsin OS=Mus musculus GN=Map7	83632.3	128935	110352	241334	119043	87068.7	74610.2	110316	88812.4	80308.7	-0.798614	0.136425
O88736	Hsd17b7	3-keto-steroid reductase OS=Mus musculus GN=Hsd17b7 PE=2 SV=1	501300	403469	489767	501763	441976	427331	435281	448316	477420	387296	-0.26122	0.371928
O88738	Birc6	Isoform 2 of Baculoviral IAP repeat-containing protein 6 OS=Mus musculus GN=Birc6	3.59038e+06	3.56432e+06	3.51667e+06	3.08855e+06	3.6166e+06	3.82205e+06	3.90857e+06	3.6407e+06	3.71971e+06	3.67149e+06	0.0859054	0.163853
O88746	Tom1	Target of Myb protein 1 OS=Mus musculus GN=Tom1 PE=1 SV=1	2.64015e+06	2.61551e+06	3.18866e+06	2.2085e+06	3.29539e+06	2.50776e+06	2.35903e+06	2.96507e+06	2.64587e+06	2.64359e+06	-0.00775806	0.642586
O88783	F5	Coagulation factor V OS=Mus musculus GN=F5 PE=1 SV=1	247862	235151	210169	239554	199379	311270	339187	292594	398928	266005	0.657496	0.0159151
O88792	F11r	Junctional adhesion molecule A OS=Mus musculus GN=F11r PE=1 SV=2	766163	854599	753322	875095	713328	812270	817270	847211	817882	819976	0.142707	0.514364
O88796	Rpp30	Ribonuclease P protein subunit p30 OS=Mus musculus GN=Rpp30 PE=2 SV=1	15754.7	14737.7	16879.5	14573.2	15093.8	14896.3	14939.8	12145.7	15148.1	13523.2	-0.0390177	0.231603
O88811	Stam2	Signal transducing adapter molecule 2 OS=Mus musculus GN=Stam2 PE=1 SV=1	836801	881772	895177	861894	833604	931036	888616	832260	884921	851006	0.0192969	0.715578
O88824	Jtb	Protein JTB OS=Mus musculus GN=Jtb PE=1 SV=1	80646.1	87091.1	81872.7	89437	79789.9	93712.3	106645	84663	87032.4	90007.9	0.213753	0.177818
O88839-2	Adam15	Isoform 2 of Disintegrin and metalloproteinase domain-containing protein 15 OS=Mus musculus GN=Adam15	455860	449666	493440	503628	542221	454779	445183	442121	488465	445369	-0.236034	0.256103
O88842	Fgd3	"Isoform 2 of FYVE, RhoGEF and PH domain-containing protein 3 OS=Mus musculus GN=Fgd3"	14771.4	12201	17202.6	15281.6	18322	10692.4	10675.2	13279.1	12761.9	9802.08	-1.07463	0.0358491
O88843	Cradd	Death domain-containing protein CRADD OS=Mus musculus GN=Cradd PE=1 SV=2	297254	280573	300647	291779	266320	225222	225545	209240	226896	190228	-0.618872	0.00481143
O88844	Idh1	Isocitrate dehydrogenase [NADP] cytoplasmic OS=Mus musculus GN=Idh1 PE=1 SV=2	7.13135e+07	7.33162e+07	6.45317e+07	7.59502e+07	7.12378e+07	8.23862e+07	7.52369e+07	7.60842e+07	7.03773e+07	7.42818e+07	0.110312	0.311295
O88845	Akap10	"A-kinase anchor protein 10, mitochondrial OS=Mus musculus GN=Akap10 PE=1 SV=3"	68937.1	64817.3	65805.9	51300.5	70820.5	45615.4	44669.9	51635.7	52198	74920.5	-0.567848	0.198248
O88848	Arl6	Isoform 2 of ADP-ribosylation factor-like protein 6 OS=Mus musculus GN=Arl6	745520	742424	774325	716853	706635	561331	582292	586125	622369	584000	-0.557317	0.00353934
O88851	Rbbp9	Putative hydrolase RBBP9 OS=Mus musculus GN=Rbbp9 PE=1 SV=2	8.10856e+06	7.50937e+06	7.7305e+06	8.07062e+06	7.89324e+06	7.64098e+06	6.77991e+06	7.69365e+06	6.63991e+06	7.80646e+06	-0.0792786	0.215821
O88856	Tpst2	Protein-tyrosine sulfotransferase 2 OS=Mus musculus GN=Tpst2 PE=1 SV=1	1.06889e+06	897929	895540	1.00187e+06	714523	1.13073e+06	1.23185e+06	999311	1.06896e+06	965217	0.378199	0.141652
O88874	Ccnk	Cyclin-K OS=Mus musculus GN=Ccnk PE=1 SV=3	74663.9	69834.8	67127.5	68119.4	64146.4	74739.4	71228.3	66666.9	65339.5	66975.7	-0.0697111	0.965514
O88876	Dhrs3	Short-chain dehydrogenase/reductase 3 OS=Mus musculus GN=Dhrs3 PE=2 SV=2	928245	762744	763416	787318	701458	858548	813381	804495	817022	799117	0.138671	0.566077
O88879-2	Apaf1	Isoform 2 of Apoptotic protease-activating factor 1 OS=Mus musculus GN=Apaf1	497904	503845	493509	578785	523991	551073	511018	516000	513236	509118	0.0352087	0.973757
O88895	Hdac3	Histone deacetylase 3 OS=Mus musculus GN=Hdac3 PE=1 SV=1	632146	558449	706087	551837	790808	551422	582390	615101	588691	557309	-0.189085	0.298009
O88939-2	Zbtb7a	Isoform 2 of Zinc finger and BTB domain-containing protein 7A OS=Mus musculus GN=Zbtb7a	143703	132194	151566	131866	157664	144711	142060	143103	136963	130474	-0.0258842	0.690026
O88947	F10	Coagulation factor X OS=Mus musculus GN=F10 PE=1 SV=1	845078	763703	982324	724278	789541	684892	756046	691019	700627	684437	-0.325328	0.0842126
O88952	Lin7c	Protein lin-7 homolog C OS=Mus musculus GN=Lin7c PE=1 SV=2	2.05961e+06	1.98761e+06	2.16256e+06	1.90276e+06	2.00546e+06	1.90508e+06	1.93331e+06	1.82387e+06	1.98828e+06	1.97447e+06	-0.0958358	0.307096
O88958	Gnpda1	Glucosamine-6-phosphate isomerase 1 OS=Mus musculus GN=Gnpda1 PE=2 SV=3	2.48367e+06	2.54734e+06	2.50016e+06	2.89651e+06	2.36897e+06	2.63029e+06	2.49775e+06	2.44503e+06	2.43156e+06	2.40779e+06	-0.0641349	0.637855
O88967	Yme1l1	ATP-dependent zinc metalloprotease YME1L1 OS=Mus musculus GN=Yme1l1 PE=2 SV=1	1.26119e+06	1.33349e+06	1.23077e+06	1.26554e+06	1.27669e+06	1.36545e+06	1.39354e+06	1.26621e+06	1.25987e+06	1.2705e+06	-0.018691	0.551949
O88968	Tcn2	Transcobalamin-2 OS=Mus musculus GN=Tcn2 PE=2 SV=1	3.27844e+06	1.34037e+06	1.2064e+06	2.01114e+06	2.05307e+06	1.80973e+06	1.00967e+06	1.12033e+06	1.04012e+06	2.52643e+06	-1.07177	0.398329
O88986	Gcat	"2-amino-3-ketobutyrate coenzyme A ligase, mitochondrial OS=Mus musculus GN=Gcat PE=1 SV=2"	2.02292e+06	1.99301e+06	1.81815e+06	2.42474e+06	2.00522e+06	1.79979e+06	1.75906e+06	1.80782e+06	2.04029e+06	1.98315e+06	-0.25739	0.281646
O89001	Cpd	Carboxypeptidase D OS=Mus musculus GN=Cpd PE=1 SV=2	3.00891e+06	3.42671e+06	3.13421e+06	4.45944e+06	3.05782e+06	2.81968e+06	2.92464e+06	2.87895e+06	3.01535e+06	2.84643e+06	-0.208444	0.144801
O89016	Abcd4	ATP-binding cassette sub-family D member 4 OS=Mus musculus GN=Abcd4 PE=2 SV=2	277670	253724	214675	258134	216964	438203	405862	315067	303738	332776	0.64521	0.0155183
O89017	Lgmn	Legumain OS=Mus musculus GN=Lgmn PE=1 SV=1	2.56028e+06	2.50027e+06	2.86729e+06	3.49245e+06	2.29759e+06	1.87738e+06	2.40659e+06	1.93956e+06	2.54309e+06	2.09511e+06	-0.484634	0.0890433
O89020	Afm	Afamin OS=Mus musculus GN=Afm PE=1 SV=2	7.68453e+06	8.42952e+06	8.8925e+06	1.00426e+07	7.61833e+06	9.00616e+06	8.07503e+06	7.86392e+06	7.74706e+06	8.97797e+06	-0.101693	0.825405
O89023	Tpp1	Tripeptidyl-peptidase 1 OS=Mus musculus GN=Tpp1 PE=1 SV=2	850063	827633	857776	942278	841798	889621	820309	822066	752839	788199	-0.0884991	0.306306
O89032	Sh3pxd2a	Isoform 2 of SH3 and PX domain-containing protein 2A OS=Mus musculus GN=Sh3pxd2a	698949	685968	690068	647470	666459	772642	793415	750401	734845	748919	0.204701	0.0272035
O89050	Mkln1	Muskelin OS=Mus musculus GN=Mkln1 PE=2 SV=1	170947	169323	206874	180380	186820	166792	168524	239057	185040	146401	-0.195921	0.879611
O89051	Itm2b	Integral membrane protein 2B OS=Mus musculus GN=Itm2b PE=2 SV=1	2.10547e+06	1.8858e+06	2.04616e+06	1.98703e+06	1.85123e+06	1.94506e+06	2.1824e+06	1.95166e+06	2.04864e+06	1.9961e+06	-0.020239	0.652807
O89053	Coro1a	Coronin-1A OS=Mus musculus GN=Coro1a PE=1 SV=5	5.97765e+06	5.9275e+06	5.58104e+06	6.73749e+06	4.63314e+06	6.86249e+06	6.69855e+06	5.82432e+06	5.59466e+06	5.31787e+06	-0.0493443	0.64744
O89079	Cope	Coatomer subunit epsilon OS=Mus musculus GN=Cope PE=2 SV=3	5.07592e+06	5.52114e+06	5.18213e+06	3.95865e+06	5.03681e+06	6.64159e+06	8.04616e+06	6.01709e+06	6.49568e+06	6.39218e+06	0.535404	0.019053
O89086	Rbm3	Putative RNA-binding protein 3 OS=Mus musculus GN=Rbm3 PE=2 SV=1	2.47123e+06	6.35727e+06	8.76011e+06	2.66872e+06	4.40777e+06	3.54057e+06	5.72167e+06	2.13821e+06	2.35335e+06	4.98413e+06	-0.553095	0.574785
O89090	Sp1	Isoform 2 of Transcription factor Sp1 OS=Mus musculus GN=Sp1	312143	336469	313012	390478	271713	413402	407705	326131	370266	361145	0.361193	0.15451
O89103	Cd93	Complement component C1q receptor OS=Mus musculus GN=Cd93 PE=1 SV=1	1.8371e+06	1.70998e+06	1.72534e+06	1.96447e+06	1.76988e+06	2.13352e+06	2.17479e+06	1.89663e+06	1.78682e+06	1.84252e+06	0.129593	0.225429
O89106	Fhit	Bis(5'-adenosyl)-triphosphatase OS=Mus musculus GN=Fhit PE=2 SV=3	563905	502088	646941	573069	567651	442111	385698	485800	484591	407682	-0.580739	0.0184616
O89110	Casp8	Caspase-8 OS=Mus musculus GN=Casp8 PE=1 SV=1	4.0961e+06	3.93601e+06	3.643e+06	4.01847e+06	3.67118e+06	5.45273e+06	5.14325e+06	4.34217e+06	4.69751e+06	4.88169e+06	0.499178	0.0122087
O89112	Lancl1	LanC-like protein 1 OS=Mus musculus GN=Lancl1 PE=1 SV=1	2.41187e+06	2.57517e+06	2.41279e+06	2.93405e+06	2.25148e+06	2.16353e+06	2.27188e+06	2.46606e+06	2.25256e+06	2.36185e+06	-0.147286	0.245295
O89116	Vti1a	Vesicle transport through interaction with t-SNAREs homolog 1A OS=Mus musculus GN=Vti1a PE=1 SV=1	360125	351247	433370	356577	425466	330051	335494	350634	375283	368111	-0.0748723	0.253323
P00158	Mt-Cyb	Cytochrome b OS=Mus musculus GN=Mt-Cyb PE=2 SV=1	614874	932065	841007	866902	1.19027e+06	580529	708560	832997	814975	889502	-0.190046	0.421658
P00186	Cyp1a2	Cytochrome P450 1A2 OS=Mus musculus GN=Cyp1a2 PE=1 SV=1	120389	117727	164595	128869	162911	81372.6	70335.7	110131	98399.4	92427	-0.856695	0.0181108
P00329	Adh1	Alcohol dehydrogenase 1 OS=Mus musculus GN=Adh1 PE=1 SV=2	5.54476e+07	5.6616e+07	5.79522e+07	6.00014e+07	4.79358e+07	4.48556e+07	4.40923e+07	4.27624e+07	4.62253e+07	4.5681e+07	-0.534301	0.0125616
P00342	Ldhc	L-lactate dehydrogenase C chain OS=Mus musculus GN=Ldhc PE=1 SV=2	2.32875e+06	4.92777e+06	1.38457e+06	1.91691e+07	1.4554e+06	1.92712e+06	2.09232e+06	1.69406e+06	1.84421e+06	1.75787e+06	-0.743643	0.347548
P00397	Mtco1	Cytochrome c oxidase subunit 1 OS=Mus musculus GN=Mtco1 PE=3 SV=1	2.05373e+06	2.59241e+06	2.1108e+06	2.53895e+06	2.60218e+06	2.05472e+06	1.9744e+06	2.31063e+06	2.11985e+06	2.31348e+06	-0.453214	0.271963
P00405	Mtco2	Cytochrome c oxidase subunit 2 OS=Mus musculus GN=Mtco2 PE=1 SV=1	7.11347e+06	2.03692e+07	1.88366e+07	7.25348e+06	1.53005e+07	1.30265e+07	7.01771e+06	2.03233e+07	6.38887e+06	1.8644e+07	-0.360178	0.898153
P00416	mt-Co3	Cytochrome c oxidase subunit 3 OS=Mus musculus GN=mt-Co3 PE=3 SV=2	111369	207154	157624	177752	150849	147355	212048	168534	202138	176343	0.254649	0.419019
P00493	Hprt1	Hypoxanthine-guanine phosphoribosyltransferase OS=Mus musculus GN=Hprt1 PE=1 SV=3	1.73772e+07	1.92545e+07	1.68634e+07	1.97605e+07	16722469	2.66091e+07	2.59224e+07	2.22456e+07	2.2166e+07	2.41191e+07	0.750411	0.00742228
P00687	Amy1	Alpha-amylase 1 OS=Mus musculus GN=Amy1 PE=1 SV=2	318746	322611	320217	561809	333977	302511	294652	378520	333514	353422	0.0774513	0.586576
P00688	Amy2	Pancreatic alpha-amylase OS=Mus musculus GN=Amy2 PE=1 SV=2	404052	472267	430989	529828	546157	411143	401832	438808	383314	402808	-0.37294	0.103122
P00848	Mtatp6	ATP synthase subunit a OS=Mus musculus GN=Mtatp6 PE=2 SV=1	1.22417e+06	1.49094e+06	1.1973e+06	1.60044e+06	1.07021e+06	1.29673e+06	1.53368e+06	1.22887e+06	1.18747e+06	1.32066e+06	0.126543	0.973988
P00920	Ca2	Carbonic anhydrase 2 OS=Mus musculus GN=Ca2 PE=1 SV=4	3.57344e+07	3.8713e+07	3.73038e+07	4.54415e+07	3.97721e+07	4.45908e+07	4.75312e+07	4.0268e+07	3.64522e+07	4.63718e+07	0.331855	0.33229
P01027	C3	Complement C3 OS=Mus musculus GN=C3 PE=1 SV=3	9.90039e+07	1.07906e+08	1.18526e+08	1.12774e+08	9.17726e+07	8.43789e+07	8.4958e+07	9.59242e+07	8.06837e+07	1.03098e+08	-0.558514	0.0883229
P01029	C4b	Complement C4-B OS=Mus musculus GN=C4b PE=1 SV=3	1.75019e+07	1.59072e+07	1.70391e+07	1.86498e+07	1.4221e+07	1.73026e+07	1.71838e+07	1.62049e+07	1.5868e+07	1.69194e+07	-0.0156532	0.949172
P01592	Igj	Immunoglobulin J chain OS=Mus musculus GN=Igj PE=2 SV=4	400006	503001	395761	470340	456020	714915	736072	512297	417588	368603	0.23744	0.358599
P01631	NA	Ig kappa chain V-II region 26-10 OS=Mus musculus PE=1 SV=1	848811	792352	646872	818449	859656	1.07342e+06	992958	684276	776477	780740	-0.142359	0.585271
P01633	Igk-V19-17	Ig kappa chain V19-17 OS=Mus musculus GN=Igk-V19-17 PE=1 SV=1	255731	254207	271312	270805	304121	344820	328687	239872	264830	226357	-0.066083	0.863738
P01635	NA	Ig kappa chain V-V region K2 (Fragment) OS=Mus musculus PE=1 SV=1	424413	549715	492694	457584	454714	861392	599462	510451	521660	427467	0.294355	0.281423
P01644	NA	Ig kappa chain V-V region HP R16.7 OS=Mus musculus PE=1 SV=1	502530	597979	537007	746508	508632	638424	728866	596670	618712	547953	0.307471	0.466612
P01654	NA	Ig kappa chain V-III region PC 2880/PC 1229 OS=Mus musculus PE=1 SV=1	419560	421243	480016	461130	763928	1.62712e+06	772111	707216	415166	561606	1.18527	0.24301
P01665	NA	Ig kappa chain V-III region CBPC 101 OS=Mus musculus PE=1 SV=1	130711	63710.5	74512.9	39467.1	71436.8	76392.5	68974.1	55541.1	48602.1	46138.8	-0.615601	0.485669
P01679	NA	Ig kappa chain V-VI region XRPC 44 OS=Mus musculus PE=1 SV=1	1.29052e+06	1.72831e+06	1.77958e+06	1.64895e+06	1.21929e+06	1.26167e+06	1.02423e+06	1.45101e+06	1.07569e+06	1.17587e+06	-0.839806	0.0900529
P01727	NA	Ig lambda-1 chain V region OS=Mus musculus PE=1 SV=2	1.69816e+06	1.4984e+06	1.28613e+06	1.61646e+06	1.38815e+06	1.45059e+06	1.99954e+06	1.60215e+06	1.19819e+06	1.67459e+06	0.140138	0.730083
P01750	NA	Ig heavy chain V region 102 OS=Mus musculus PE=1 SV=1	63304.8	53988	93061.1	84166.4	66178.4	136410	62271.6	59740.3	58959.4	45472.1	-0.28114	0.86174
P01758	Igh-VJ558	Ig heavy chain V region 108A OS=Mus musculus GN=Igh-VJ558 PE=4 SV=1	788895	708045	749951	774808	779877	743080	771019	693978	740024	694113	-0.13573	0.397859
P01786	NA	Ig heavy chain V region MOPC 47A OS=Mus musculus PE=1 SV=1	136870	149759	138320	171702	163051	149592	187659	118621	116955	117472	-0.571229	0.426697
P01803	NA	Ig heavy chain V region AMPC1 OS=Mus musculus PE=1 SV=1	701381	745115	995397	838482	1.03592e+06	869240	740079	773343	598484	479777	-0.331558	0.191736
P01831	Thy1	Thy-1 membrane glycoprotein OS=Mus musculus GN=Thy1 PE=1 SV=1	1.36091e+06	1.0931e+06	1.29679e+06	1.23653e+06	1.20973e+06	1.10511e+06	1.22384e+06	1.11794e+06	1.13301e+06	1.06209e+06	-0.281154	0.175462
P01837	NA	Ig kappa chain C region OS=Mus musculus PE=1 SV=1	2.70739e+06	3.24822e+06	2.77142e+06	3.41906e+06	2.62952e+06	5.03078e+06	5.45299e+06	3.89767e+06	2.98373e+06	2.67355e+06	0.764088	0.178324
P01843	NA	Ig lambda-1 chain C region OS=Mus musculus PE=1 SV=1	25298.8	87004.8	30931.1	46860.1	22927	86832.2	119664	88845	51419	50185.9	2.95567	0.0917851
P01845	Iglc3	Ig lambda-3 chain C region OS=Mus musculus GN=Iglc3 PE=1 SV=1	406168	413881	369172	382050	419767	368658	409345	432520	378643	379312	-0.159647	0.858759
P01864	NA	Ig gamma-2A chain C region secreted form OS=Mus musculus PE=1 SV=1	5.42468e+06	4.86956e+06	4.64117e+06	5.18842e+06	4.71542e+06	8.25125e+06	9.15535e+06	7.931e+06	5.91304e+06	3.91933e+06	1.08199	0.15097
P01867-2	Igh-3	Isoform 2 of Ig gamma-2B chain C region OS=Mus musculus GN=Igh-3	3.97119e+06	4.42619e+06	4.37952e+06	4.11212e+06	3.81772e+06	4.99664e+06	4.79641e+06	5.87254e+06	3.90044e+06	3.02867e+06	0.333351	0.694063
P01868	Ighg1	Ig gamma-1 chain C region secreted form OS=Mus musculus GN=Ighg1 PE=1 SV=1	5.66354e+06	6.76119e+06	6.68007e+06	7.28279e+06	5.934e+06	5.7484e+06	8.80999e+06	6.68517e+06	6.85325e+06	7.31708e+06	0.0436186	0.449034
P01872	Ighm	Ig mu chain C region OS=Mus musculus GN=Ighm PE=1 SV=2	9.84854e+06	1.11899e+07	1.02332e+07	1.01991e+07	12999413	1.75571e+07	1.76305e+07	1.43163e+07	9.92742e+06	1.03373e+07	0.753824	0.215009
P01878	NA	Ig alpha chain C region OS=Mus musculus PE=1 SV=1	2.59231e+06	3.0352e+06	3.24016e+06	3.60389e+06	3.86184e+06	1.76145e+06	2.02472e+06	2.0152e+06	1.89931e+06	2.06279e+06	-1.09436	0.0037953
P01887	B2m	Beta-2-microglobulin OS=Mus musculus GN=B2m PE=1 SV=2	8.10174e+06	3.30525e+07	5.87064e+06	1.15345e+08	7.69579e+06	1.07773e+07	1.18836e+07	8.91297e+06	9.18019e+06	1.15558e+07	0.199325	0.509532
P01898	H2-Q10	"H-2 class I histocompatibility antigen, Q10 alpha chain OS=Mus musculus GN=H2-Q10 PE=1 SV=3"	2.94329e+06	3.63144e+06	3.88397e+06	3.47988e+06	3.90166e+06	3.34482e+06	3.96582e+06	4.04416e+06	3.84814e+06	3.40944e+06	0.116332	0.633237
P01899	H2-D1	"H-2 class I histocompatibility antigen, D-B alpha chain OS=Mus musculus GN=H2-D1 PE=1 SV=2"	3.28629e+06	4.17374e+06	3.37236e+06	4.59194e+06	3.82845e+06	3.90821e+06	3.81865e+06	3.42298e+06	3.54652e+06	3.72146e+06	-0.0774933	0.701788
P01901	H2-K1	"H-2 class I histocompatibility antigen, K-B alpha chain OS=Mus musculus GN=H2-K1 PE=1 SV=1"	3.22487e+06	3.49608e+06	3.34281e+06	4.11796e+06	3.41098e+06	3.02649e+06	3.03486e+06	3.07882e+06	3.24492e+06	3.33642e+06	-0.25534	0.13263
P01904	H2-Ea	"H-2 class II histocompatibility antigen, E-D alpha chain OS=Mus musculus GN=H2-Ea PE=1 SV=2"	44780.6	50171.2	49021	44781.3	43210	65162.9	53575.3	213880	120546	50083.5	1.04857	0.110663
P01942	Hba	Hemoglobin subunit alpha OS=Mus musculus GN=Hba PE=1 SV=2	2400286471	2952015343	2794498703	3166203978	2711093792	3283503586	4094962841	2796587533	2412239804	3571445244	0.361275	0.351973
P02088	Hbb-b1	Hemoglobin subunit beta-1 OS=Mus musculus GN=Hbb-b1 PE=1 SV=2	2173967857	2627579942	2714167239	2922487896	2648375808	2892120518	3445851953	2457185919	2102227646	3174334041	0.188724	0.659715
P02104	Hbb-y	Hemoglobin subunit epsilon-Y2 OS=Mus musculus GN=Hbb-y PE=1 SV=2	1.25547e+06	1.78371e+06	1.73226e+06	1.91174e+06	1.85926e+06	1.96583e+06	2.49113e+06	1.74669e+06	1.84202e+06	2.06524e+06	0.22629	0.198895
P02463	Col4a1	Collagen alpha-1(IV) chain OS=Mus musculus GN=Col4a1 PE=2 SV=4	6.41213e+06	2.52751e+06	2.86535e+06	2.8727e+06	3.04486e+06	2.67829e+06	2.92535e+06	3.14244e+06	5.52228e+06	2.36719e+06	0.0170134	0.886591
P02468	Lamc1	Laminin subunit gamma-1 OS=Mus musculus GN=Lamc1 PE=1 SV=2	4.92622e+07	3.94924e+07	3.60189e+07	3.73327e+07	3.89937e+07	4.53041e+07	4.45537e+07	4.07714e+07	5.11848e+07	4.12975e+07	0.287612	0.26319
P02469	Lamb1	Laminin subunit beta-1 OS=Mus musculus GN=Lamb1 PE=1 SV=3	9.85929e+07	6.83443e+07	6.38383e+07	6.05108e+07	7.46339e+07	7.47189e+07	6.90057e+07	7.16919e+07	8.63379e+07	7.43775e+07	0.197503	0.766357
P02798	Mt2	Metallothionein-2 OS=Mus musculus GN=Mt2 PE=1 SV=2	219141	225500	182036	308734	145240	305427	229229	274058	310250	135642	0.471842	0.597977
P03888	Mtnd1	NADH-ubiquinone oxidoreductase chain 1 OS=Mus musculus GN=Mtnd1 PE=1 SV=3	868995	933455	897269	891690	814480	972985	711834	853903	825570	948155	-0.122688	0.770611
P03893	Mtnd2	NADH-ubiquinone oxidoreductase chain 2 OS=Mus musculus GN=Mtnd2 PE=1 SV=1	125215	157230	166622	164874	149984	132589	140671	153440	153616	187990	-0.0658	0.977675
P03899	Mtnd3	NADH-ubiquinone oxidoreductase chain 3 OS=Mus musculus GN=Mtnd3 PE=3 SV=3	244120	281890	293204	298220	312140	222572	183180	250632	232987	244017	-0.513067	0.0384518
P03911	Mtnd4	NADH-ubiquinone oxidoreductase chain 4 OS=Mus musculus GN=Mtnd4 PE=1 SV=1	1.89287e+06	2.60265e+06	2.58655e+06	2.57149e+06	2.16256e+06	2.21577e+06	2.05372e+06	2.21433e+06	2.0339e+06	2.74586e+06	-0.348797	0.695705
P03921	Mtnd5	NADH-ubiquinone oxidoreductase chain 5 OS=Mus musculus GN=Mtnd5 PE=3 SV=2	1.756e+06	2.00656e+06	1.99813e+06	2.11439e+06	1.97487e+06	1.87176e+06	1.83902e+06	1.89644e+06	1.80892e+06	2.00621e+06	-0.147429	0.452838
P03930	Mtatp8	ATP synthase protein 8 OS=Mus musculus GN=Mtatp8 PE=1 SV=1	816289	1.0061e+06	752408	843920	847163	823798	767740	798140	813589	769530	-0.156293	0.358599
P03953-2	Cfd	Isoform 2 of Complement factor D OS=Mus musculus GN=Cfd	9.48896e+06	1.02485e+07	9.9353e+06	1.03918e+07	9.09272e+06	8.09731e+06	8.40535e+06	8.37016e+06	8.87116e+06	8.54117e+06	-0.382455	0.0193755
P03958	Ada	Adenosine deaminase OS=Mus musculus GN=Ada PE=1 SV=3	245154	233061	252617	307345	258053	245848	194286	223668	232732	212730	-0.287944	0.0958691
P03977	NA	Ig kappa chain V-III region 50S10.1 OS=Mus musculus PE=1 SV=1	263974	297906	306531	353428	281441	867302	486697	1.29198e+06	249758	295713	1.34562	0.18109
P03987	NA	Isoform 2 of Ig gamma-3 chain C region OS=Mus musculus	5.60896e+06	6.21222e+06	6.65027e+06	6.66648e+06	5.93214e+06	6.9056e+06	6.32469e+06	5.78538e+06	4.61958e+06	5.13835e+06	-0.170784	0.432651
P04117	Fabp4	"Fatty acid-binding protein, adipocyte OS=Mus musculus GN=Fabp4 PE=1 SV=3"	1024492945	1219492835	9.77444e+08	1185444133	1054444347	1410013756	1456804162	1368392339	1462274346	1571461444	0.698952	0.00725173
P04186	Cfb	Complement factor B OS=Mus musculus GN=Cfb PE=1 SV=2	1.86903e+07	1.67534e+07	1.70984e+07	1.8801e+07	1.47024e+07	1.81309e+07	1.77638e+07	1.67285e+07	1.4799e+07	1.78535e+07	0.0741806	0.936059
P04202	Tgfb1	Transforming growth factor beta-1 OS=Mus musculus GN=Tgfb1 PE=1 SV=1	26700.5	36211.6	34466.6	26494.1	39626.4	28345.3	32429	31772.5	29395.5	29357	-0.377614	0.579928
P04230	H2-Eb1	"H-2 class II histocompatibility antigen, E-B beta chain OS=Mus musculus GN=H2-Eb1 PE=1 SV=1"	83042.4	80393.8	69653.6	96021.4	68375.2	115612	118111	67114	73720.2	74686.5	-0.190305	0.582171
P04247	Mb	Myoglobin OS=Mus musculus GN=Mb PE=1 SV=3	1.17382e+06	1.83605e+06	967199	1.28922e+06	1.31898e+06	971667	846618	884582	861012	1.00723e+06	-0.93148	0.0420954
P04441-2	Cd74	Isoform Short of H-2 class II histocompatibility antigen gamma chain OS=Mus musculus GN=Cd74	1.10198e+06	1.07464e+06	1.01083e+06	1.29188e+06	950680	1.37755e+06	1.38001e+06	1.05525e+06	1.04041e+06	1.07463e+06	-0.00276076	0.455983
P04444	Hbb-bh1	Hemoglobin subunit beta-H1 OS=Mus musculus GN=Hbb-bh1 PE=2 SV=3	131164	157558	144592	153712	168891	171872	156431	154353	138028	149424	-0.0348006	0.818734
P04627	Araf	Serine/threonine-protein kinase A-Raf OS=Mus musculus GN=Araf PE=2 SV=2	903799	924759	1.26533e+06	995839	1.13542e+06	715925	768123	917098	790695	823617	-0.580604	0.0357605
P04919-2	Slc4a1	Isoform Kidney of Band 3 anion transport protein OS=Mus musculus GN=Slc4a1	1.42743e+07	1.45998e+07	1.70108e+07	13686578	1.60813e+07	1.57738e+07	1.76929e+07	1.52996e+07	1.38704e+07	1.64996e+07	0.181776	0.586861
P04925	Prnp	Major prion protein OS=Mus musculus GN=Prnp PE=1 SV=2	1.01969e+06	942211	940662	979710	1.02665e+06	1.10945e+06	1.32969e+06	1.08362e+06	1.18253e+06	1.154e+06	0.372799	0.0237071
P04939	Mup3	Major urinary protein 3 OS=Mus musculus GN=Mup3 PE=1 SV=1	733707	769163	839227	887135	761875	673067	608233	741369	632432	751334	-0.311704	0.0661483
P05017	Igf1	Insulin-like growth factor I OS=Mus musculus GN=Igf1 PE=2 SV=2	95275.1	75030.8	105759	95206.2	104216	88286.2	86726.7	83806.9	78717	83504.5	-0.347114	0.210626
P05064	Aldoa	Fructose-bisphosphate aldolase A OS=Mus musculus GN=Aldoa PE=1 SV=2	8.8397e+07	9.53745e+07	8.28198e+07	8.71221e+07	8.6593e+07	1.02777e+08	111167703	1.00007e+08	9.75423e+07	9.80152e+07	0.287799	0.0288548
P05132	Prkaca	cAMP-dependent protein kinase catalytic subunit alpha OS=Mus musculus GN=Prkaca PE=1 SV=3	1.68135e+07	1.65291e+07	1.48651e+07	1.71482e+07	1.73764e+07	2.05209e+07	2.08334e+07	2.02535e+07	1.84775e+07	2.09576e+07	0.446862	0.0120056
P05201	Got1	"Aspartate aminotransferase, cytoplasmic OS=Mus musculus GN=Got1 PE=1 SV=3"	3.05048e+06	3.00042e+06	3.16322e+06	3.26945e+06	2.52154e+06	2.85729e+06	3.10406e+06	2.45376e+06	2.93662e+06	2.64662e+06	-0.145072	0.425069
P05202	Got2	"Aspartate aminotransferase, mitochondrial OS=Mus musculus GN=Got2 PE=1 SV=1"	1.62447e+07	1.31825e+07	1.50497e+07	1.471e+07	1.12475e+07	1.21739e+07	1.22432e+07	1.05832e+07	1.25977e+07	1.06536e+07	-0.457405	0.0899176
P05208	Cela2a	Chymotrypsin-like elastase family member 2A OS=Mus musculus GN=Cela2a PE=2 SV=1	362170	359425	333878	397190	417081	354087	287554	356873	342646	341134	-0.134993	0.196828
P05214	Tuba3a	Tubulin alpha-3 chain OS=Mus musculus GN=Tuba3a PE=1 SV=1	68375.4	99818	65039.4	182821	72770.8	50834.5	46928.7	62174.3	40149.6	57931.2	-1.0412	0.0600742
P05480	Src	Neuronal proto-oncogene tyrosine-protein kinase Src OS=Mus musculus GN=Src PE=1 SV=4	492037	476153	477893	472870	498186	472660	484000	483348	457510	473041	-0.028445	0.628482
P05555	Itgam	Integrin alpha-M OS=Mus musculus GN=Itgam PE=1 SV=2	3.40993e+06	3.39872e+06	3.45421e+06	3.9118e+06	3.13996e+06	3.47023e+06	3.35601e+06	3.14919e+06	3.14129e+06	3.09921e+06	-0.192977	0.319492
P05622	Pdgfrb	Platelet-derived growth factor receptor beta OS=Mus musculus GN=Pdgfrb PE=1 SV=1	1.5456e+06	1.47669e+06	1.65033e+06	1.4617e+06	1.57846e+06	1.37493e+06	1.36341e+06	1.48378e+06	1.39911e+06	1.45872e+06	-0.232158	0.106076
P05977	Myl1	"Isoform MLC3 of Myosin light chain 1/3, skeletal muscle isoform OS=Mus musculus GN=Myl1"	673886	599869	516750	580633	575948	1.29314e+06	743088	862002	649924	722586	0.588857	0.0653625
P06151	Ldha	L-lactate dehydrogenase A chain OS=Mus musculus GN=Ldha PE=1 SV=3	1.10272e+08	1.34991e+08	1.11321e+08	1.34298e+08	1.52446e+08	1.26369e+08	124587844	1.29748e+08	1.18951e+08	1.25539e+08	-0.162229	0.826548
P06330	NA	Ig heavy chain V region AC38 205.12 OS=Mus musculus PE=1 SV=1	722378	769802	817643	913655	800424	742927	832972	759235	815083	681187	-0.141218	0.530307
P06339	H2-T23	"H-2 class I histocompatibility antigen, D-37 alpha chain OS=Mus musculus GN=H2-T23 PE=1 SV=1"	439301	565706	611190	697255	587371	369070	298692	455645	371741	455221	-1.05697	0.0252433
P06537-3	Nr3c1	Isoform 1-B of Glucocorticoid receptor OS=Mus musculus GN=Nr3c1	1.59635e+06	1.65064e+06	1.78616e+06	1.57173e+06	1.88921e+06	1.56262e+06	1.41855e+06	1.68423e+06	1.64829e+06	1.71224e+06	-0.012425	0.433185
P06683	C9	Complement component C9 OS=Mus musculus GN=C9 PE=1 SV=2	7.34971e+06	6.71612e+06	6.20089e+06	6.98916e+06	6.15791e+06	6.33977e+06	6.27896e+06	7.03744e+06	5.86596e+06	6.2052e+06	-0.155536	0.452063
P06684	C5	Complement C5 OS=Mus musculus GN=C5 PE=1 SV=2	1.02279e+07	1.02532e+07	9.86264e+06	1.01297e+07	8.80071e+06	9.3576e+06	9.6843e+06	1.00157e+07	8.78722e+06	9.94786e+06	-0.1202	0.620652
P06728	Apoa4	Apolipoprotein A-IV OS=Mus musculus GN=Apoa4 PE=1 SV=3	3.85649e+07	4.14877e+07	3.95346e+07	3.98251e+07	3.64317e+07	6.6158e+07	6.66174e+07	6.21588e+07	5.9577e+07	6.2391e+07	1.10495	0.000166734
P06745	Gpi	Glucose-6-phosphate isomerase OS=Mus musculus GN=Gpi PE=1 SV=4	5.33982e+07	5.34886e+07	4.40698e+07	5.85942e+07	4.87441e+07	5.65401e+07	5.4253e+07	5.396e+07	5.28616e+07	54227514	0.0328006	0.447695
P06797	Ctsl	Cathepsin L1 OS=Mus musculus GN=Ctsl PE=1 SV=2	4.9322e+06	5.21029e+06	4.12291e+06	9.0032e+06	3.42607e+06	3.59238e+06	4.85938e+06	3.28499e+06	4.32388e+06	3.28078e+06	-0.786028	0.242404
P06800	Ptprc	Isoform 2 of Receptor-type tyrosine-protein phosphatase C OS=Mus musculus GN=Ptprc	1.14497e+06	1.14085e+06	1.0921e+06	1.28102e+06	998221	1.12225e+06	1.04824e+06	939104	1.02288e+06	988805	-0.253826	0.192097
P06801	Me1	NADP-dependent malic enzyme OS=Mus musculus GN=Me1 PE=1 SV=2	1.2724e+08	2.09434e+08	1.46955e+08	1.07502e+08	2.35039e+08	1.44856e+08	172029965	1.31916e+08	1.24577e+08	1.41589e+08	-0.100025	0.612498
P06869	Plau	Urokinase-type plasminogen activator OS=Mus musculus GN=Plau PE=1 SV=1	1.15702e+06	2.59488e+06	733450	7.97365e+06	776340	1.20297e+06	1.11636e+06	1.18419e+06	1.09045e+06	1.14873e+06	-0.186378	0.511257
P06909	Cfh	Complement factor H OS=Mus musculus GN=Cfh PE=1 SV=2	2.41195e+07	2.4829e+07	2.12581e+07	2.427e+07	1.85056e+07	2.73271e+07	2.69915e+07	2.62186e+07	2.1935e+07	2.65791e+07	0.216756	0.168018
P07091	S100a4	Protein S100-A4 OS=Mus musculus GN=S100a4 PE=1 SV=1	5.96255e+06	5.93627e+06	4.86015e+06	6.50767e+06	5.38264e+06	9.91275e+06	1.09081e+07	6.54748e+06	7.52829e+06	7.28043e+06	0.550763	0.032978
P07141	Csf1	Isoform 2 of Macrophage colony-stimulating factor 1 OS=Mus musculus GN=Csf1	122941	157799	144528	158277	135745	166502	151500	140912	146018	185072	0.102157	0.329492
P07214	Sparc	SPARC OS=Mus musculus GN=Sparc PE=1 SV=1	1.23983e+07	1.23616e+07	1.16333e+07	1.27004e+07	1.22281e+07	1.68994e+07	1.957e+07	1.56553e+07	1.44136e+07	1.4516e+07	0.527727	0.0141058
P07309	Ttr	Transthyretin OS=Mus musculus GN=Ttr PE=1 SV=1	2.90899e+07	3.17424e+07	3.78402e+07	2.63681e+07	2.39273e+07	3.63942e+07	3.38415e+07	2.31274e+07	2.56096e+07	3.24529e+07	0.165999	0.937909
P07310	Ckm	Creatine kinase M-type OS=Mus musculus GN=Ckm PE=1 SV=1	1.40115e+06	3.87683e+06	1.43267e+06	2.27474e+06	2.21274e+06	1.49461e+06	1.13788e+06	1.40178e+06	1.18699e+06	1.41437e+06	-1.06942	0.0924026
P07356	Anxa2	Annexin A2 OS=Mus musculus GN=Anxa2 PE=1 SV=2	3.82399e+08	3.47043e+08	3.16125e+08	4.29836e+08	3.27178e+08	5.57248e+08	5.25896e+08	4.65954e+08	482471796	5.31472e+08	0.982684	0.00759455
P07724	Alb	Serum albumin OS=Mus musculus GN=Alb PE=1 SV=3	4600985147	4349527247	4459991481	5235998153	3455352366	5438324381	4616275875	4535479134	3977654666	4958922405	0.0823304	0.573289
P07742	Rrm1	Ribonucleoside-diphosphate reductase large subunit OS=Mus musculus GN=Rrm1 PE=1 SV=2	1.95495e+06	1.74134e+06	1.80807e+06	1.88915e+06	1.58418e+06	1.67596e+06	1.57431e+06	1.57184e+06	1.57261e+06	1.53411e+06	-0.317077	0.0707682
P07758	Serpina1a	Alpha-1-antitrypsin 1-1 OS=Mus musculus GN=Serpina1a PE=1 SV=4	1.04339e+08	126754701	9.22736e+07	1.54195e+08	9.06942e+07	1.57638e+08	1.59664e+08	1.10583e+08	111803238	1.46772e+08	0.656407	0.255516
P07759	Serpina3k	Serine protease inhibitor A3K OS=Mus musculus GN=Serpina3k PE=1 SV=2	6.36264e+07	6.95164e+07	60533596	6.86293e+07	6.50212e+07	6.9569e+07	6.70604e+07	7.07249e+07	6.81009e+07	6.62156e+07	0.0783714	0.383921
P07901	Hsp90aa1	Heat shock protein HSP 90-alpha OS=Mus musculus GN=Hsp90aa1 PE=1 SV=4	3.50891e+07	3.85527e+07	3.25011e+07	4.54075e+07	3.61138e+07	41471294	4.21304e+07	3.41577e+07	4.02706e+07	3.91551e+07	0.215244	0.578339
P07934	Phkg1	"Phosphorylase b kinase gamma catalytic chain, skeletal muscle/heart isoform OS=Mus musculus GN=Phkg1 PE=2 SV=3"	232541	213573	193054	69607.3	282260	195813	189457	254570	187085	203997	-0.194456	0.703076
P08003	Pdia4	Protein disulfide-isomerase A4 OS=Mus musculus GN=Pdia4 PE=1 SV=3	4.09403e+07	4.51733e+07	3.48134e+07	4.61602e+07	3.9194e+07	4.61038e+07	4.54765e+07	4.28371e+07	4.48012e+07	4.52171e+07	0.22113	0.245786
P08030	Aprt	Adenine phosphoribosyltransferase OS=Mus musculus GN=Aprt PE=1 SV=2	1.75655e+06	1.43011e+06	1.85462e+06	1.59422e+06	1.67869e+06	1.17649e+06	1.30402e+06	1.51538e+06	1.37772e+06	1.36202e+06	-0.481149	0.0372682
P08032	Spta1	"Spectrin alpha chain, erythrocytic 1 OS=Mus musculus GN=Spta1 PE=2 SV=3"	2.52702e+07	2.08817e+07	2.74773e+07	1.62918e+07	2.58248e+07	2.41963e+07	2.75346e+07	2.51436e+07	2.51089e+07	2.3711e+07	-0.0267245	0.45833
P08071	Ltf	Lactotransferrin OS=Mus musculus GN=Ltf PE=2 SV=4	78302.1	86884.6	75154.9	81266.5	80074.6	72546.2	71543.7	84741.3	87757.5	70602.5	-0.247889	0.604416
P08074	Cbr2	Carbonyl reductase [NADPH] 2 OS=Mus musculus GN=Cbr2 PE=1 SV=1	1.33019e+07	1.45e+07	1.46592e+07	1.7559e+07	1.46873e+07	1.37923e+07	1.17419e+07	1.23981e+07	1.08494e+07	1.23923e+07	-0.385061	0.0433636
P08101-3	Fcgr2	Isoform IIB2 of Low affinity immunoglobulin gamma Fc region receptor II OS=Mus musculus GN=Fcgr2	969762	988990	928447	1.12322e+06	896956	997177	1.05532e+06	907843	918710	921544	-0.125176	0.788298
P08103	Hck	Isoform 2 of Tyrosine-protein kinase HCK OS=Mus musculus GN=Hck	157813	184311	172528	177679	188166	166298	179499	148751	154370	143928	-0.370128	0.16415
P08113	Hsp90b1	Endoplasmin OS=Mus musculus GN=Hsp90b1 PE=1 SV=2	6.22925e+07	7.47609e+07	6.66029e+07	8.01808e+07	7.35489e+07	7.79143e+07	7.97225e+07	7.11909e+07	7.34398e+07	7.54003e+07	0.0417878	0.421057
P08121	Col3a1	Collagen alpha-1(III) chain OS=Mus musculus GN=Col3a1 PE=1 SV=4	1.10569e+06	959685	1.03644e+06	1.05058e+06	918793	1.08487e+06	1.06219e+06	1.03123e+06	1.15282e+06	999977	0.0554032	0.42175
P08122	Col4a2	Collagen alpha-2(IV) chain OS=Mus musculus GN=Col4a2 PE=2 SV=4	7.25717e+06	3.39576e+06	3.68216e+06	3.83263e+06	3.40018e+06	3.16283e+06	3.43725e+06	3.95496e+06	6.29107e+06	2.9093e+06	-0.21343	0.767537
P08207	S100a10	Protein S100-A10 OS=Mus musculus GN=S100a10 PE=1 SV=2	6.04496e+07	4.97341e+07	4.80529e+07	5.83339e+07	4.78989e+07	7.58003e+07	6.90493e+07	6.27462e+07	6.67764e+07	6.94652e+07	0.778291	0.0154443
P08226	Apoe	Apolipoprotein E OS=Mus musculus GN=Apoe PE=1 SV=2	9.99715e+06	1.01059e+07	1.0334e+07	1.25227e+07	9.32652e+06	1.00192e+07	1.04119e+07	1.20569e+07	9.52473e+06	1.09846e+07	0.0695101	0.879766
P08228	Sod1	Superoxide dismutase [Cu-Zn] OS=Mus musculus GN=Sod1 PE=1 SV=2	1.27394e+08	143799955	1.24824e+08	1.48625e+08	1.36475e+08	1.22908e+08	1.03608e+08	1.23451e+08	1.14982e+08	1.32979e+08	-0.242146	0.108726
P08249	Mdh2	"Malate dehydrogenase, mitochondrial OS=Mus musculus GN=Mdh2 PE=1 SV=3"	7.20297e+07	8.21091e+07	6.44186e+07	6.94951e+07	7.18699e+07	7.02384e+07	7.18545e+07	7.03672e+07	6.79513e+07	6.93111e+07	-0.0654522	0.691066
P08556	Nras	GTPase NRas OS=Mus musculus GN=Nras PE=2 SV=1	1.0996e+06	1.05526e+06	1.13401e+06	1.14685e+06	1.05593e+06	1.30451e+06	1.24346e+06	1.1837e+06	1.13403e+06	1.32836e+06	0.276347	0.0587722
P08607	C4bpa	C4b-binding protein OS=Mus musculus GN=C4bpa PE=1 SV=3	5.88076e+06	6.08219e+06	5.22019e+06	6.43284e+06	5.62703e+06	4.82765e+06	5.6802e+06	5.45801e+06	5.0299e+06	5.6059e+06	-0.177125	0.192184
P08752	Gnai2	Guanine nucleotide-binding protein G(i) subunit alpha-2 OS=Mus musculus GN=Gnai2 PE=1 SV=5	4.96379e+06	3.99997e+06	4.34494e+06	5.59381e+06	4.04146e+06	3.42663e+06	3.62272e+06	3.99193e+06	4.11039e+06	3.72712e+06	-0.362477	0.0815644
P08775	Polr2a	DNA-directed RNA polymerase II subunit RPB1 OS=Mus musculus GN=Polr2a PE=1 SV=3	1.0121e+06	731471	913454	657142	776703	741358	809969	766174	935411	718908	-0.0561943	0.871119
P09036	Spink3	Serine protease inhibitor Kazal-type 3 OS=Mus musculus GN=Spink3 PE=1 SV=1	696716	1.4929e+07	556894	6.24293e+07	531432	641983	590199	675225	602909	664150	-0.137609	0.244346
P09041	Pgk2	Phosphoglycerate kinase 2 OS=Mus musculus GN=Pgk2 PE=1 SV=4	325157	412824	243628	1.49645e+06	191910	228336	274959	207546	222779	208062	-1.07774	0.245786
P09055	Itgb1	Integrin beta-1 OS=Mus musculus GN=Itgb1 PE=1 SV=1	3.22063e+07	3.21787e+07	2.87125e+07	3.40032e+07	3.11791e+07	3.63697e+07	3.80664e+07	3.47276e+07	3.48488e+07	3.7884e+07	0.284558	0.0351419
P09103	P4hb	Protein disulfide-isomerase OS=Mus musculus GN=P4hb PE=1 SV=2	8.24457e+07	8.40465e+07	6.88245e+07	9.31253e+07	7.30946e+07	1.1235e+08	1.12743e+08	9.20131e+07	9.33217e+07	1.00551e+08	0.445547	0.0335544
P09242	Alpl	"Alkaline phosphatase, tissue-nonspecific isozyme OS=Mus musculus GN=Alpl PE=1 SV=2"	1.81194e+06	1.41511e+06	1.96564e+06	1.73643e+06	1.44971e+06	1.19448e+06	1.28312e+06	1.15444e+06	1.42171e+06	1.17574e+06	-0.938129	0.0223952
P09405	Ncl	Nucleolin OS=Mus musculus GN=Ncl PE=1 SV=2	3.02027e+07	2.9135e+07	3.21196e+07	1.68107e+07	2.67761e+07	2.95182e+07	31093616	2.43656e+07	2.87369e+07	2.68413e+07	-0.0433099	0.723193
P09411	Pgk1	Phosphoglycerate kinase 1 OS=Mus musculus GN=Pgk1 PE=1 SV=4	2.778e+07	2.86018e+07	2.5827e+07	2.70212e+07	2.54935e+07	3.05699e+07	3.0313e+07	2.82534e+07	2.88418e+07	2.97052e+07	0.196849	0.0803908
P09470	Ace	Angiotensin-converting enzyme OS=Mus musculus GN=Ace PE=1 SV=3	1.87802e+07	1.46486e+07	1.84967e+07	1.88076e+07	9.36147e+06	1.07224e+07	1.17446e+07	1.14838e+07	1.30546e+07	9.5615e+06	-1.03204	0.109847
P09528	Fth1	Ferritin heavy chain OS=Mus musculus GN=Fth1 PE=1 SV=2	8.57537e+06	9.72038e+06	8.34117e+06	9.35092e+06	8.84953e+06	8.32247e+06	8.11459e+06	7.53082e+06	9.7005e+06	8.42454e+06	-0.134048	0.376199
P09581	Csf1r	Macrophage colony-stimulating factor 1 receptor OS=Mus musculus GN=Csf1r PE=1 SV=3	1.74292e+06	1.67361e+06	1.71647e+06	1.75333e+06	1.55225e+06	2.17291e+06	1.8411e+06	1.66322e+06	1.64032e+06	1.62224e+06	-0.0853462	0.538685
P09602	Hmgn2	Non-histone chromosomal protein HMG-17 OS=Mus musculus GN=Hmgn2 PE=1 SV=2	828842	2.46214e+06	1.54191e+06	3.50231e+06	1.35358e+06	905772	880636	511692	1.4105e+06	775125	-1.58412	0.0899176
P09671	Sod2	"Superoxide dismutase [Mn], mitochondrial OS=Mus musculus GN=Sod2 PE=1 SV=3"	8.48228e+06	1.0458e+07	9.03369e+06	8.05583e+06	1.01982e+07	8.55467e+06	8.72151e+06	7.46567e+06	8.03525e+06	8.40424e+06	-0.165672	0.1857
P09813	Apoa2	Apolipoprotein A-II OS=Mus musculus GN=Apoa2 PE=1 SV=2	7.57879e+06	1.12728e+07	7.48483e+06	9.96228e+06	8.36669e+06	1.85304e+07	2.24036e+07	1.42137e+07	1.50207e+07	2.13166e+07	1.92936	0.00516615
P09925	Surf1	Surfeit locus protein 1 OS=Mus musculus GN=Surf1 PE=2 SV=3	258681	253821	310042	249884	269161	213525	207833	225876	253276	216192	-0.423508	0.0397277
P0C0A3	Chmp6	Charged multivesicular body protein 6 OS=Mus musculus GN=Chmp6 PE=2 SV=2	277914	245843	285376	287380	295786	258090	218956	254446	244276	258300	-0.266276	0.0944333
P0C605	Prkg1	cGMP-dependent protein kinase 1 OS=Mus musculus GN=Prkg1 PE=1 SV=1	481468	394984	427731	431722	360898	451254	434897	434153	375098	415250	0.0203044	0.921799
P0C7N9	Psmg4	Proteasome assembly chaperone 4 OS=Mus musculus GN=Psmg4 PE=1 SV=1	241144	238323	235585	260506	307047	228385	193741	212770	216563	227973	-0.253617	0.0641725
P0C872	Jmjd7	JmjC domain-containing protein 7 OS=Mus musculus GN=Jmjd7 PE=2 SV=1	260083	289102	294898	279728	291963	208159	226430	270778	253235	266176	-0.305346	0.0832543
P0CL69	Znf703	Zinc finger protein 703 OS=Mus musculus GN=Znf703 PE=1 SV=1	316829	271517	321585	279087	303973	340552	295673	282857	289226	311826	-0.0758844	0.81255
P0CW02	Ly6c1	Lymphocyte antigen 6C1 OS=Mus musculus GN=Ly6c1 PE=2 SV=1	3.00733e+06	1.78545e+06	2.30226e+06	1.77986e+06	1.96178e+06	1.30422e+06	1.4403e+06	1.44921e+06	1.94879e+06	1.39164e+06	-0.769051	0.0520912
P0DJF2	Pet117	"Protein PET117 homolog, mitochondrial OS=Mus musculus GN=Pet117 PE=3 SV=1"	322312	342634	314029	335499	301348	292449	306279	283398	301916	273224	-0.221185	0.0751655
P0DM40	Fer1l5	Fer-1-like protein 5 OS=Mus musculus GN=Fer1l5 PE=1 SV=1	237630	239222	264491	211632	252824	233183	233996	251907	254366	241775	0.0252548	0.891633
P10107	Anxa1	Annexin A1 OS=Mus musculus GN=Anxa1 PE=1 SV=2	8.88694e+07	7.81783e+07	7.77151e+07	1.10272e+08	1.02714e+08	145084225	1.31821e+08	1.1489e+08	1.09837e+08	125462880	0.797401	0.0252744
P10126	Eef1a1	Elongation factor 1-alpha 1 OS=Mus musculus GN=Eef1a1 PE=1 SV=3	1.36186e+08	1.84701e+08	1.27019e+08	1.79594e+08	1.29266e+08	2.11997e+08	2.4577e+08	161259881	1.5578e+08	2.18622e+08	0.893354	0.111652
P10404	NA	MLV-related proviral Env polyprotein OS=Mus musculus PE=1 SV=3	142673	139417	160286	141919	182256	117121	122501	117705	142499	110544	-0.485968	0.0381756
P10493	Nid1	Nidogen-1 OS=Mus musculus GN=Nid1 PE=1 SV=2	5.38882e+07	3.59691e+07	3.67105e+07	3.34945e+07	4.332e+07	4.10445e+07	4.76073e+07	3.6785e+07	4.59519e+07	4.26564e+07	0.330729	0.640643
P10518	Alad	Delta-aminolevulinic acid dehydratase OS=Mus musculus GN=Alad PE=1 SV=1	1.04265e+07	1.04292e+07	9.54742e+06	1.06735e+07	8.89792e+06	9.51146e+06	9.14247e+06	9.37767e+06	9.23689e+06	9.38002e+06	-0.245109	0.24495
P10605	Ctsb	Cathepsin B OS=Mus musculus GN=Ctsb PE=1 SV=2	2.57195e+07	2.64916e+07	2.5749e+07	2.88374e+07	2.60788e+07	2.94364e+07	3.45297e+07	2.70846e+07	2.88183e+07	2.69532e+07	0.193788	0.196052
P10630	Eif4a2	Isoform 2 of Eukaryotic initiation factor 4A-II OS=Mus musculus GN=Eif4a2	4.88154e+06	3.96131e+06	3.6856e+06	3.99169e+06	3.67554e+06	5.47265e+06	5.50268e+06	4.19911e+06	4.23434e+06	5.69474e+06	0.66094	0.0858941
P10637	Mapt	Microtubule-associated protein tau OS=Mus musculus GN=Mapt PE=1 SV=3	444807	408676	362737	389245	295881	376358	482385	338233	429615	360192	-0.10832	0.737081
P10639	Txn	Thioredoxin OS=Mus musculus GN=Txn PE=1 SV=3	2.74147e+07	32169528	2.96872e+07	3.35343e+07	2.61625e+07	3.69129e+07	4.12347e+07	3.07246e+07	3.41349e+07	3.58605e+07	0.422516	0.0742863
P10649	Gstm1	Glutathione S-transferase Mu 1 OS=Mus musculus GN=Gstm1 PE=1 SV=2	4.13529e+07	4.07877e+07	4.17509e+07	4.72257e+07	3.83706e+07	4.00951e+07	3.92423e+07	3.85772e+07	3.94621e+07	4.03765e+07	-0.115586	0.330516
P10711	Tcea1	Isoform 1 of Transcription elongation factor A protein 1 OS=Mus musculus GN=Tcea1	395804	419468	458860	409266	406264	353840	326133	361824	342026	349826	-0.412	0.0112167
P10810	Cd14	Monocyte differentiation antigen CD14 OS=Mus musculus GN=Cd14 PE=1 SV=1	3.86038e+06	3.51079e+06	3.10213e+06	3.56893e+06	3.48344e+06	2.17176e+06	2.03068e+06	2.38694e+06	2.44538e+06	2.28423e+06	-1.01054	0.00269908
P10833	Rras	Ras-related protein R-Ras OS=Mus musculus GN=Rras PE=2 SV=1	1.08988e+07	1.02189e+07	9.05799e+06	1.15653e+07	9.41929e+06	1.3021e+07	1.24746e+07	1.23903e+07	1.20518e+07	1.3912e+07	0.468636	0.0184965
P10852	Slc3a2	Isoform 2 of 4F2 cell-surface antigen heavy chain OS=Mus musculus GN=Slc3a2	1.03748e+07	1.01764e+07	9.08515e+06	1.18437e+07	8.91455e+06	1.1293e+07	1.14078e+07	1.01183e+07	1.03129e+07	1.10898e+07	0.198103	0.343199
P10922	H1f0	Histone H1.0 OS=Mus musculus GN=H1f0 PE=2 SV=4	1.06807e+07	2.54628e+06	1.09e+07	1.91758e+06	7.37226e+06	5.42318e+06	7.31293e+06	7.20399e+06	9.9451e+06	5.77663e+06	-0.0692952	0.588271
P11031	Sub1	Activated RNA polymerase II transcriptional coactivator p15 OS=Mus musculus GN=Sub1 PE=1 SV=3	3.73561e+06	3.63366e+06	3.733e+06	3.69606e+06	3.41798e+06	3.52163e+06	3.44877e+06	3.29075e+06	3.52279e+06	3.27245e+06	-0.176392	0.164541
P11087	Col1a1	Isoform 2 of Collagen alpha-1(I) chain OS=Mus musculus GN=Col1a1	3.1624e+06	2.71164e+06	2.82336e+06	3.15256e+06	2.57147e+06	2.30679e+06	2.27859e+06	2.22651e+06	2.53016e+06	1.96053e+06	-0.495562	0.0193755
P11103	Parp1	Poly [ADP-ribose] polymerase 1 OS=Mus musculus GN=Parp1 PE=1 SV=3	805784	1.01563e+06	831901	904752	902363	1.13262e+06	1.12606e+06	898767	984289	1.02288e+06	0.270879	0.101249
P11152	Lpl	Lipoprotein lipase OS=Mus musculus GN=Lpl PE=1 SV=3	1.07908e+07	9.14056e+06	1.03219e+07	6.8284e+06	1.00153e+07	9.94831e+06	1.14822e+07	1.05743e+07	1.0728e+07	9.1436e+06	0.0941364	0.386356
P11276	Fn1	Fibronectin OS=Mus musculus GN=Fn1 PE=1 SV=4	1.5187e+07	1.04087e+07	1.23538e+07	9.41964e+06	1.20788e+07	1.36016e+07	1.52047e+07	1.37692e+07	1.27233e+07	1.53569e+07	0.308764	0.142219
P11352	Gpx1	Glutathione peroxidase 1 OS=Mus musculus GN=Gpx1 PE=1 SV=2	1.72774e+07	1.96466e+07	1.74078e+07	1.85646e+07	1.52937e+07	2.51806e+07	2.44878e+07	2.11877e+07	2.1977e+07	2.34483e+07	0.671088	0.0100351
P11404	Fabp3	"Fatty acid-binding protein, heart OS=Mus musculus GN=Fabp3 PE=1 SV=5"	36108.3	103097	30187.6	90444	17291.8	49966.8	26085.3	25078.9	26344.7	31954.5	-1.01887	0.430253
P11438	Lamp1	Lysosome-associated membrane glycoprotein 1 OS=Mus musculus GN=Lamp1 PE=1 SV=2	4.15095e+06	4.43534e+06	3.42291e+06	4.71097e+06	3.78566e+06	5.41436e+06	5.9424e+06	4.46395e+06	4.69697e+06	4.95312e+06	0.398069	0.0613933
P11499	Hsp90ab1	Heat shock protein HSP 90-beta OS=Mus musculus GN=Hsp90ab1 PE=1 SV=3	5.88298e+07	6.69571e+07	6.23925e+07	5.99686e+07	7.15683e+07	6.98506e+07	7.08796e+07	6.28178e+07	6.76355e+07	6.91245e+07	0.227392	0.321272
P11589	Mup2	Major urinary protein 2 OS=Mus musculus GN=Mup2 PE=1 SV=1	899206	1.12245e+06	888380	1.23116e+06	809358	867385	621312	878161	699695	956005	-0.0865524	0.177693
P11609	Cd1d1	Antigen-presenting glycoprotein CD1d1 OS=Mus musculus GN=Cd1d1 PE=1 SV=3	2.87538e+06	3.29016e+06	2.77882e+06	3.37619e+06	4.12358e+06	4.00625e+06	4.23676e+06	3.85651e+06	3.77606e+06	4.39275e+06	0.461323	0.0601318
P11627	L1cam	Neural cell adhesion molecule L1 OS=Mus musculus GN=L1cam PE=1 SV=1	325312	339248	343388	345652	332674	267765	298943	292559	284677	328585	-0.345845	0.039938
P11672	Lcn2	Neutrophil gelatinase-associated lipocalin OS=Mus musculus GN=Lcn2 PE=1 SV=1	81619.1	102382	91523.7	160455	63443.2	79315.3	85906	62046.3	72974.7	61468	-0.534384	0.203484
P11679	Krt8	"Keratin, type II cytoskeletal 8 OS=Mus musculus GN=Krt8 PE=1 SV=4"	7.60087e+06	4.33512e+06	8.16392e+06	2.84358e+06	5.00481e+06	3.86686e+06	5.12308e+06	3.18759e+06	6.34839e+06	3.37576e+06	-0.650058	0.49524
P11680	Cfp	Properdin OS=Mus musculus GN=Cfp PE=2 SV=2	2.48905e+06	3.02646e+06	2.58161e+06	3.32792e+06	2.82529e+06	3.2347e+06	2.62564e+06	2.67418e+06	2.56205e+06	2.77347e+06	-0.148372	0.805254
P11688	Itga5	Integrin alpha-5 OS=Mus musculus GN=Itga5 PE=1 SV=3	2.17923e+06	2.10722e+06	2.35829e+06	2.21063e+06	2.08922e+06	2.35219e+06	2.19995e+06	2.29916e+06	2.20441e+06	2.14611e+06	0.017661	0.6412
P11725	Otc	"Ornithine carbamoyltransferase, mitochondrial OS=Mus musculus GN=Otc PE=1 SV=1"	1.08135e+06	944858	1.36322e+06	1.30732e+06	926226	655410	600698	706266	849906	897837	-0.999105	0.0232756
P11835	Itgb2	Integrin beta-2 OS=Mus musculus GN=Itgb2 PE=1 SV=2	4.71463e+06	4.63632e+06	4.35809e+06	5.78051e+06	3.81917e+06	4.94305e+06	4.72297e+06	4.14554e+06	4.17777e+06	4.2449e+06	-0.208133	0.709333
P11859	Agt	Angiotensinogen OS=Mus musculus GN=Agt PE=1 SV=1	3.45509e+06	3.70503e+06	3.04989e+06	4.12436e+06	2.59056e+06	4.44778e+06	3.82929e+06	3.42182e+06	3.93541e+06	3.61219e+06	0.230897	0.270328
P11881-3	Itpr1	"Isoform 3 of Inositol 1,4,5-trisphosphate receptor type 1 OS=Mus musculus GN=Itpr1"	2.49052e+06	2.43069e+06	2.66957e+06	2.66113e+06	2.67178e+06	2.26877e+06	2.44548e+06	2.29584e+06	2.34605e+06	2.36398e+06	-0.292768	0.0606071
P11930	Nudt19	"Nucleoside diphosphate-linked moiety X motif 19, mitochondrial OS=Mus musculus GN=Nudt19 PE=1 SV=2"	2.48919e+06	2.02843e+06	2.1259e+06	2.01639e+06	1.76462e+06	2.50697e+06	2.57245e+06	2.10123e+06	2.3963e+06	2.18614e+06	0.367024	0.197377
P11983	Tcp1	T-complex protein 1 subunit alpha OS=Mus musculus GN=Tcp1 PE=1 SV=3	2.58691e+07	2.72477e+07	2.57689e+07	3.01995e+07	2.67981e+07	2.54197e+07	2.67628e+07	2.5641e+07	2.41285e+07	2.62584e+07	-0.121535	0.306974
P12023	App	Amyloid beta A4 protein OS=Mus musculus GN=App PE=1 SV=3	3.29143e+06	2.78434e+06	3.20252e+06	2.34233e+06	2.70236e+06	3.84764e+06	4.22888e+06	3.54427e+06	3.78116e+06	3.86071e+06	0.764981	0.0152204
P12032	Timp1	Metalloproteinase inhibitor 1 OS=Mus musculus GN=Timp1 PE=1 SV=2	87274.9	126138	86893	207207	92865	81546.9	82749.9	95049.8	79085.5	85059.1	-0.346919	0.199948
P12265	Gusb	Beta-glucuronidase OS=Mus musculus GN=Gusb PE=2 SV=2	2.3061e+06	2.49578e+06	2.36899e+06	3.00039e+06	2.59871e+06	2.62647e+06	2.69407e+06	2.37556e+06	2.37163e+06	2.413e+06	-0.0803335	0.811797
P12367	Prkar2a	cAMP-dependent protein kinase type II-alpha regulatory subunit OS=Mus musculus GN=Prkar2a PE=1 SV=2	2.07611e+06	1.90741e+06	2.01749e+06	1.81909e+06	1.89272e+06	1.96898e+06	1.97683e+06	1.79055e+06	1.85699e+06	1.83058e+06	-0.0679089	0.57836
P12382	Pfkl	"ATP-dependent 6-phosphofructokinase, liver type OS=Mus musculus GN=Pfkl PE=1 SV=4"	1.22373e+07	1.33838e+07	1.26813e+07	1.16597e+07	1.3889e+07	1.2474e+07	1.23699e+07	1.22945e+07	1.18356e+07	1.2041e+07	-0.0815675	0.423768
P12388	Serpinb2	"Plasminogen activator inhibitor 2, macrophage OS=Mus musculus GN=Serpinb2 PE=2 SV=1"	240234	234822	200019	341125	212834	282837	261739	230547	215352	308598	0.255662	0.67619
P12710	Fabp1	"Fatty acid-binding protein, liver OS=Mus musculus GN=Fabp1 PE=1 SV=2"	8.58587e+06	8.40991e+06	9.23553e+06	1.09227e+07	7.30386e+06	2.89171e+06	2.33744e+06	2.76735e+06	4.91497e+06	4.74882e+06	-2.90946	0.00516615
P12787	Cox5a	"Cytochrome c oxidase subunit 5A, mitochondrial OS=Mus musculus GN=Cox5a PE=1 SV=2"	8.22205e+06	1.20793e+07	9.07247e+06	9.25001e+06	9.78137e+06	1.03379e+07	1.06948e+07	1.00516e+07	9.43251e+06	1.03409e+07	0.244361	0.547682
P12804	Fgl2	Fibroleukin OS=Mus musculus GN=Fgl2 PE=1 SV=1	420218	383834	365100	388091	317447	346038	316319	340582	325381	295256	-0.376517	0.0924026
P12815	Pdcd6	Programmed cell death protein 6 OS=Mus musculus GN=Pdcd6 PE=1 SV=2	4.21072e+06	4.924e+06	5.18574e+06	4.68174e+06	5.01122e+06	6.26328e+06	7.21633e+06	4.83383e+06	6.71749e+06	4.88435e+06	0.451762	0.104633
P12970	Rpl7a	60S ribosomal protein L7a OS=Mus musculus GN=Rpl7a PE=2 SV=2	9.82427e+06	4.35156e+06	9.74695e+06	3.49606e+06	8.52787e+06	1.28127e+07	1.33987e+07	1.06597e+07	1.18075e+07	1.08869e+07	0.669196	0.0664542
P13020-2	Gsn	Isoform 2 of Gelsolin OS=Mus musculus GN=Gsn	2.99196e+06	2.29285e+06	2.62961e+06	2.77216e+06	2.06026e+06	2.95755e+06	2.96517e+06	2.85928e+06	2.80254e+06	2.50338e+06	0.168569	0.294223
P13020	Gsn	Gelsolin OS=Mus musculus GN=Gsn PE=1 SV=3	4.94663e+06	4.0289e+06	3.92694e+06	4.83365e+06	3.02141e+06	6.48272e+06	6.43283e+06	4.76882e+06	4.34708e+06	4.85561e+06	0.448578	0.122647
P13439	Umps	Uridine 5'-monophosphate synthase OS=Mus musculus GN=Umps PE=2 SV=3	2.41321e+06	2.64861e+06	2.63097e+06	2.14592e+06	2.35818e+06	2.7364e+06	2.35522e+06	2.42046e+06	2.47467e+06	2.47158e+06	0.0428866	0.755224
P13516	Scd1	Acyl-CoA desaturase 1 OS=Mus musculus GN=Scd1 PE=1 SV=2	2.27194e+07	2.04057e+07	1.8254e+07	1.9276e+07	1.65058e+07	3.75096e+07	3.9125e+07	3.32281e+07	3.48913e+07	3.3472e+07	1.48625	0.00138628
P13595	Ncam1	Neural cell adhesion molecule 1 OS=Mus musculus GN=Ncam1 PE=1 SV=3	753803	840873	891229	754047	633471	591340	640915	648315	727966	676741	-0.396339	0.106594
P13597-2	Icam1	Isoform 2 of Intercellular adhesion molecule 1 OS=Mus musculus GN=Icam1	2.79223e+06	2.64884e+06	3.0262e+06	2.85591e+06	2.5256e+06	2.73274e+06	3.08753e+06	2.6247e+06	2.64558e+06	2.7154e+06	-0.0669892	0.970964
P13634	Ca1	Carbonic anhydrase 1 OS=Mus musculus GN=Ca1 PE=2 SV=4	1.49312e+07	2.37306e+07	2.50931e+07	2.50889e+07	2.33987e+07	2.20503e+07	2.49185e+07	2.12145e+07	1.82607e+07	2.39354e+07	-0.162196	0.978928
P13707	Gpd1	"Glycerol-3-phosphate dehydrogenase [NAD(+)], cytoplasmic OS=Mus musculus GN=Gpd1 PE=1 SV=3"	1.63449e+08	1.18828e+08	1.73444e+08	8.79029e+07	1.74161e+08	1.23902e+08	1.62932e+08	9.61705e+07	8.66814e+07	1.50447e+08	-0.620123	0.55376
P13808-2	Slc4a2	Isoform B1 of Anion exchange protein 2 OS=Mus musculus GN=Slc4a2	749373	769720	724208	796451	740931	929447	939303	838513	849208	875922	0.352552	0.0159151
P13864	Dnmt1	DNA (cytosine-5)-methyltransferase 1 OS=Mus musculus GN=Dnmt1 PE=1 SV=5	903791	920781	943169	1.08899e+06	916952	903791	881525	885266	881678	842348	-0.106644	0.177873
P14069	S100a6	Protein S100-A6 OS=Mus musculus GN=S100a6 PE=1 SV=3	2.23743e+06	2.04415e+06	2.94497e+06	2.10716e+06	2.33677e+06	2.28776e+06	2.43206e+06	1.82951e+06	2.48186e+06	2.01097e+06	0.0500368	0.660951
P14094	Atp1b1	Sodium/potassium-transporting ATPase subunit beta-1 OS=Mus musculus GN=Atp1b1 PE=1 SV=1	573387	326161	579544	273607	246657	255248	426092	213341	454041	273619	-0.486026	0.547403
P14106	C1qb	Complement C1q subcomponent subunit B OS=Mus musculus GN=C1qb PE=1 SV=2	440218	417462	471534	501387	480145	337011	293676	377692	370017	391531	-0.538553	0.0162821
P14115	Rpl27a	60S ribosomal protein L27a OS=Mus musculus GN=Rpl27a PE=2 SV=5	4.86888e+06	1.61925e+06	5.1646e+06	1.45643e+06	4.59927e+06	4.378e+06	4.51462e+06	4.3766e+06	4.42116e+06	3.92186e+06	-0.10179	0.358231
P14131	Rps16	40S ribosomal protein S16 OS=Mus musculus GN=Rps16 PE=2 SV=4	1.92426e+07	1.57273e+07	2.24003e+07	1.44693e+07	2.03473e+07	2.07824e+07	2.07334e+07	2.14955e+07	1.97384e+07	1.92441e+07	0.168823	0.32063
P14142	Slc2a4	"Solute carrier family 2, facilitated glucose transporter member 4 OS=Mus musculus GN=Slc2a4 PE=1 SV=3"	2.77182e+06	2.47841e+06	1.89532e+06	2.2051e+06	2.59215e+06	2.36692e+06	2.41046e+06	2.20159e+06	2.20461e+06	2.74212e+06	-0.152903	0.976586
P14148	Rpl7	60S ribosomal protein L7 OS=Mus musculus GN=Rpl7 PE=1 SV=2	1.28665e+07	5.49878e+06	1.35712e+07	3.82581e+06	1.19153e+07	1.41471e+07	1.45664e+07	1.29924e+07	1.34538e+07	1.26548e+07	0.229835	0.177489
P14152	Mdh1	"Malate dehydrogenase, cytoplasmic OS=Mus musculus GN=Mdh1 PE=1 SV=3"	6.44634e+07	6.83413e+07	5.36149e+07	6.06929e+07	5.34892e+07	6.95673e+07	6.80887e+07	6.00181e+07	5.79025e+07	6.33015e+07	0.0707064	0.473874
P14206	Rpsa	40S ribosomal protein SA OS=Mus musculus GN=Rpsa PE=1 SV=4	1.30239e+07	1.30421e+07	1.1652e+07	1.1648e+07	1.21113e+07	13083571	1.39243e+07	1.17915e+07	1.22736e+07	1.28059e+07	0.111613	0.531422
P14211	Calr	Calreticulin OS=Mus musculus GN=Calr PE=1 SV=1	4.35761e+07	4.55678e+07	4.13463e+07	5.06974e+07	4.26742e+07	4.93531e+07	5.00227e+07	4.51107e+07	4.36454e+07	4.67503e+07	0.154638	0.459575
P14434	H2-Aa	"H-2 class II histocompatibility antigen, A-B alpha chain OS=Mus musculus GN=H2-Aa PE=1 SV=2"	1.12413e+06	1.10878e+06	944533	1.38885e+06	955537	1.49749e+06	1.25206e+06	884768	875456	1.1019e+06	-0.0146134	0.981129
P14483	H2-Ab1	"H-2 class II histocompatibility antigen, A beta chain OS=Mus musculus GN=H2-Ab1 PE=1 SV=1"	2.57769e+06	2.66094e+06	2.99727e+06	3.34102e+06	2.92929e+06	2.9572e+06	2.60916e+06	2.31746e+06	2.17512e+06	2.3553e+06	-0.517703	0.124923
P14576	Srp54	Signal recognition particle 54 kDa protein OS=Mus musculus GN=Srp54 PE=1 SV=2	2.60237e+06	2.6345e+06	2.40665e+06	2.13058e+06	2.76924e+06	2.78132e+06	2.98368e+06	2.59222e+06	2.60979e+06	2.61581e+06	0.00861726	0.287466
P14602-2	Hspb1	Isoform B of Heat shock protein beta-1 OS=Mus musculus GN=Hspb1	1.01145e+07	1.20288e+07	1.0783e+07	1.18087e+07	1.18137e+07	1.52917e+07	1.43056e+07	1.27673e+07	1.33992e+07	1.27746e+07	0.25451	0.0271576
P14685	Psmd3	26S proteasome non-ATPase regulatory subunit 3 OS=Mus musculus GN=Psmd3 PE=1 SV=3	1.23072e+07	1.26764e+07	1.17675e+07	1.38821e+07	1.16041e+07	1.30141e+07	1.29831e+07	1.20326e+07	1.28319e+07	1.21604e+07	0.0788082	0.82329
P14733	Lmnb1	Lamin-B1 OS=Mus musculus GN=Lmnb1 PE=1 SV=3	2.06959e+07	1.23253e+07	1.63472e+07	1.08697e+07	1.41378e+07	1.14849e+07	1.30947e+07	1.35756e+07	1.76117e+07	1.20982e+07	-0.195265	0.671736
P14824	Anxa6	Annexin A6 OS=Mus musculus GN=Anxa6 PE=1 SV=3	1.22325e+08	1.0087e+08	9.49101e+07	125903642	1.01321e+08	1.728e+08	1.70345e+08	1.46955e+08	1.43257e+08	1.4741e+08	0.849726	0.00891878
P14869	Rplp0	60S acidic ribosomal protein P0 OS=Mus musculus GN=Rplp0 PE=1 SV=3	1.57554e+07	6.60854e+06	1.59166e+07	4.4686e+06	1.31598e+07	1.47185e+07	1.60948e+07	1.36196e+07	1.38836e+07	1.3131e+07	0.0901975	0.288505
P14873	Map1b	Microtubule-associated protein 1B OS=Mus musculus GN=Map1b PE=1 SV=2	2.87226e+06	1.78559e+06	2.36616e+06	1.61504e+06	1.58832e+06	2.39356e+06	2.48132e+06	1.85958e+06	2.3147e+06	1.86206e+06	0.589592	0.634756
P14901	Hmox1	Heme oxygenase 1 OS=Mus musculus GN=Hmox1 PE=1 SV=1	1.79235e+06	1.60633e+06	1.70447e+06	1.77603e+06	1.82244e+06	1.68464e+06	1.76216e+06	1.58529e+06	1.65092e+06	1.40468e+06	-0.190952	0.268114
P15066	Jund	Transcription factor jun-D OS=Mus musculus GN=Jund PE=1 SV=1	82811.5	97809	102605	120786	91039.3	101086	89216.3	100091	85087	102773	0.0414447	0.78843
P15092-2	Ifi204	Isoform 2 of Interferon-activable protein 204 OS=Mus musculus GN=Ifi204	853904	966779	1.01347e+06	1.07146e+06	970614	801633	803952	782725	884763	901266	-0.453369	0.0522789
P15105	Glul	Glutamine synthetase OS=Mus musculus GN=Glul PE=1 SV=6	3.27708e+07	3.12852e+07	2.97869e+07	2.58769e+07	2.74193e+07	2.566e+07	3.22946e+07	2.45401e+07	2.83612e+07	2.58739e+07	-0.333987	0.41385
P15208	Insr	Insulin receptor OS=Mus musculus GN=Insr PE=1 SV=2	3.76666e+06	3.64434e+06	3.57197e+06	3.38551e+06	3.65837e+06	3.38873e+06	3.31551e+06	3.42639e+06	3.56778e+06	3.55583e+06	-0.149055	0.338327
P15209-2	Ntrk2	Isoform GP95-TRKB of BDNF/NT-3 growth factors receptor OS=Mus musculus GN=Ntrk2	736033	665333	698043	789349	697298	752171	744413	802667	747704	812039	0.15816	0.1986
P15261	Ifngr1	Interferon gamma receptor 1 OS=Mus musculus GN=Ifngr1 PE=1 SV=3	1.65322e+06	1.51148e+06	1.32371e+06	1.59119e+06	1.20953e+06	2.23132e+06	2.32145e+06	1.91411e+06	1.90928e+06	2.19562e+06	0.860475	0.00857085
P15306	Thbd	Thrombomodulin OS=Mus musculus GN=Thbd PE=1 SV=1	2.24205e+06	1.10613e+06	1.93105e+06	1.10922e+06	1.4543e+06	1.49391e+06	1.82027e+06	1.14359e+06	2.03278e+06	1.14561e+06	0.0439389	0.965514
P15327	Bpgm	Bisphosphoglycerate mutase OS=Mus musculus GN=Bpgm PE=2 SV=2	7.62917e+06	1.09362e+07	1.03782e+07	1.28514e+07	1.02827e+07	1.1061e+07	1.25275e+07	1.04732e+07	9.18394e+06	1.19733e+07	0.142169	0.62903
P15331-2	Prph	Isoform 3u of Peripherin OS=Mus musculus GN=Prph	100116	68788.1	119381	69680.2	96419.1	64236.1	62825.5	111642	78316.3	82283.6	-0.476994	0.516365
P15379-2	Cd44	Isoform 8 of CD44 antigen OS=Mus musculus GN=Cd44	1.46709e+06	1.34552e+06	1.40787e+06	1.53626e+06	1.34059e+06	1.99058e+06	2.11525e+06	1.47449e+06	1.65538e+06	1.56886e+06	0.34915	0.0662441
P15508	Sptb	"Spectrin beta chain, erythrocytic OS=Mus musculus GN=Sptb PE=1 SV=4"	2.25015e+07	1.89609e+07	2.49223e+07	1.47395e+07	2.3199e+07	1.98661e+07	2.21749e+07	2.23938e+07	2.15983e+07	2.02817e+07	-0.100618	0.807155
P15532	Nme1	Nucleoside diphosphate kinase A OS=Mus musculus GN=Nme1 PE=1 SV=1	5.28758e+06	5.44835e+06	5.06698e+06	5.71026e+06	4.80637e+06	7.79267e+06	8.00403e+06	6.23448e+06	6.36925e+06	6.82938e+06	0.581145	0.0121723
P15535-2	B4galt1	"Isoform Short of Beta-1,4-galactosyltransferase 1 OS=Mus musculus GN=B4galt1"	517755	489287	484744	509767	476554	414299	414439	399216	420430	385498	-0.385303	0.00540751
P15626	Gstm2	Glutathione S-transferase Mu 2 OS=Mus musculus GN=Gstm2 PE=1 SV=2	2.67835e+07	2.83206e+07	2.79466e+07	3.57041e+07	2.59803e+07	2.48135e+07	2.61985e+07	2.50025e+07	2.46265e+07	2.44085e+07	-0.280529	0.106877
P15864	Hist1h1c	Histone H1.2 OS=Mus musculus GN=Hist1h1c PE=1 SV=2	1.28521e+06	301123	899537	197784	849485	1.38606e+06	1.57918e+06	1.19208e+06	1.14619e+06	1.04762e+06	0.710279	0.111142
P15920	Atp6v0a2	V-type proton ATPase 116 kDa subunit a isoform 2 OS=Mus musculus GN=Atp6v0a2 PE=1 SV=2	197273	203213	229426	206806	218326	208071	210246	203888	202319	215124	-0.0126997	0.807873
P16015	Ca3	Carbonic anhydrase 3 OS=Mus musculus GN=Ca3 PE=1 SV=3	1128005232	1331925948	9.76833e+08	1331347300	1215821237	1373586939	1403207345	1335879083	1223062563	1490506740	0.273023	0.156572
P16045	Lgals1	Galectin-1 OS=Mus musculus GN=Lgals1 PE=1 SV=3	190549865	1.76942e+08	1.36909e+08	1.92071e+08	1.54245e+08	3.0678e+08	3.13526e+08	2.43663e+08	2.51886e+08	2.65822e+08	0.951233	0.00540751
P16054	Prkce	Protein kinase C epsilon type OS=Mus musculus GN=Prkce PE=1 SV=1	987637	1.07635e+06	907810	821511	898510	1.00044e+06	949158	924360	939773	1.01661e+06	0.0954455	0.663222
P16056	Met	Hepatocyte growth factor receptor OS=Mus musculus GN=Met PE=1 SV=1	1.08859e+06	1.2059e+06	1.29184e+06	1.41491e+06	1.27981e+06	1.02774e+06	1.01938e+06	1.24951e+06	1.12774e+06	1.10081e+06	-0.351279	0.134583
P16092-2	Fgfr1	Isoform 2 of Fibroblast growth factor receptor 1 OS=Mus musculus GN=Fgfr1	352393	390370	356808	426067	363783	385440	386728	385155	375953	389707	0.119417	0.743396
P16110	Lgals3	Galectin-3 OS=Mus musculus GN=Lgals3 PE=1 SV=3	5.19786e+06	4.99692e+06	5.08343e+06	7.09922e+06	5.1496e+06	6.29946e+06	6.93642e+06	5.77508e+06	6.67096e+06	5.22118e+06	0.445039	0.293791
P16125	Ldhb	L-lactate dehydrogenase B chain OS=Mus musculus GN=Ldhb PE=1 SV=2	4.04563e+07	3.9577e+07	3.62112e+07	4.36782e+07	3.1553e+07	4.23846e+07	4.39102e+07	36380897	3.99741e+07	3.88166e+07	0.0124673	0.550152
P16254	Srp14	Signal recognition particle 14 kDa protein OS=Mus musculus GN=Srp14 PE=1 SV=1	201295	156553	136266	154706	124506	181150	172311	163867	163244	124153	0.0917101	0.761115
P16301	Lcat	Phosphatidylcholine-sterol acyltransferase OS=Mus musculus GN=Lcat PE=1 SV=2	331301	415992	357424	426556	382451	386924	415295	389055	361905	424783	0.0139457	0.660527
P16330	Cnp	"2',3'-cyclic-nucleotide 3'-phosphodiesterase OS=Mus musculus GN=Cnp PE=1 SV=3"	1.49017e+06	1.5439e+06	1.52695e+06	1.70055e+06	1.26091e+06	1.73855e+06	1.76682e+06	1.54832e+06	1.59071e+06	1.5954e+06	0.0953086	0.239455
P16331	Pah	Phenylalanine-4-hydroxylase OS=Mus musculus GN=Pah PE=1 SV=4	691086	626767	672117	748227	686009	375260	294221	375662	418753	411646	-1.40369	0.00265045
P16332	Mut	"Methylmalonyl-CoA mutase, mitochondrial OS=Mus musculus GN=Mut PE=1 SV=2"	1.72303e+07	1.96845e+07	1.74477e+07	1.7774e+07	1.86631e+07	1.74509e+07	1.90376e+07	1.79556e+07	1.77244e+07	1.8391e+07	-0.0141743	0.976701
P16406	Enpep	Glutamyl aminopeptidase OS=Mus musculus GN=Enpep PE=1 SV=1	9.01488e+06	1.02185e+07	9.1044e+06	9.04308e+06	1.19181e+07	7.81631e+06	8.00295e+06	8.66875e+06	7.97187e+06	8.59525e+06	-0.328361	0.0570598
P16460	Ass1	Argininosuccinate synthase OS=Mus musculus GN=Ass1 PE=1 SV=1	8.68128e+06	8.17109e+06	9.0288e+06	1.2219e+07	6.91081e+06	4.30543e+06	3.68042e+06	3.87384e+06	5.91351e+06	5.3216e+06	-1.78747	0.00804782
P16546-2	Sptan1	"Isoform 2 of Spectrin alpha chain, non-erythrocytic 1 OS=Mus musculus GN=Sptan1"	479207	445426	443503	447011	450438	444019	633335	532707	656854	548973	0.479168	0.058872
P16546	Sptan1	"Spectrin alpha chain, non-erythrocytic 1 OS=Mus musculus GN=Sptan1 PE=1 SV=4"	1.40321e+06	859695	1.18e+06	861851	1.61307e+06	886991	1.21458e+06	1.41073e+06	1.81975e+06	1.33679e+06	0.277693	0.586438
P16675	Ctsa	Lysosomal protective protein OS=Mus musculus GN=Ctsa PE=1 SV=1	6.41587e+06	6.05232e+06	6.09209e+06	6.69108e+06	5.74649e+06	5.85707e+06	6.44446e+06	5.81199e+06	6.19082e+06	5.74169e+06	-0.0808334	0.589717
P16858	Gapdh	Glyceraldehyde-3-phosphate dehydrogenase OS=Mus musculus GN=Gapdh PE=1 SV=2	1.70312e+08	3.9312e+08	184757116	3.54184e+08	3.07311e+08	2.90434e+08	1.91034e+08	1.82806e+08	1.6982e+08	3.61563e+08	-0.733665	0.60803
P16879	Fes	Tyrosine-protein kinase Fes/Fps OS=Mus musculus GN=Fes PE=1 SV=2	145707	147225	175452	149094	142579	139035	146015	124026	141555	124127	-0.129625	0.126923
P16882	Ghr	Growth hormone receptor OS=Mus musculus GN=Ghr PE=1 SV=1	1.09858e+06	1.09316e+06	1.0225e+06	1.06746e+06	1.02586e+06	1.21989e+06	1.18316e+06	1.07597e+06	1.15112e+06	1.1463e+06	0.141684	0.0993374
P17012	Zfx	Zinc finger X-chromosomal protein OS=Mus musculus GN=Zfx PE=1 SV=2	208519	122876	233753	136045	233128	132173	110292	160718	170511	126090	-1.02444	0.211586
P17047	Lamp2	Lysosome-associated membrane glycoprotein 2 OS=Mus musculus GN=Lamp2 PE=2 SV=2	4.25609e+06	4.09944e+06	4.35049e+06	3.94951e+06	3.60122e+06	3.65458e+06	4.41555e+06	3.824e+06	4.33871e+06	3.64823e+06	-0.166714	0.810602
P17095	Hmga1	Isoform HMG-Y of High mobility group protein HMG-I/HMG-Y OS=Mus musculus GN=Hmga1	159296	213420	138381	269812	208082	171866	157858	155494	181327	175854	-0.435236	0.403135
P17125	Tgfb3	Transforming growth factor beta-3 OS=Mus musculus GN=Tgfb3 PE=2 SV=1	223180	261196	237986	280257	260933	240635	237090	205618	214493	240018	-0.218731	0.179403
P17156	Hspa2	Heat shock-related 70 kDa protein 2 OS=Mus musculus GN=Hspa2 PE=1 SV=2	6.38695e+06	6.43355e+06	5.12064e+06	1.30089e+07	3.95817e+06	5.76979e+06	6.05199e+06	4.82394e+06	5.7996e+06	5.26437e+06	-0.242407	0.578564
P17182	Eno1	Alpha-enolase OS=Mus musculus GN=Eno1 PE=1 SV=3	8.92675e+07	1.11197e+08	9.63061e+07	9.07846e+07	1.08413e+08	9.60523e+07	1.07725e+08	8.59897e+07	9.25153e+07	9.43378e+07	-0.0527976	0.652432
P17225	Ptbp1	Polypyrimidine tract-binding protein 1 OS=Mus musculus GN=Ptbp1 PE=1 SV=2	1.12905e+07	1.31169e+07	1.27678e+07	1.18098e+07	1.15747e+07	1.15065e+07	1.08427e+07	1.02198e+07	1.18063e+07	1.08204e+07	-0.237889	0.143823
P17426-2	Ap2a1	Isoform B of AP-2 complex subunit alpha-1 OS=Mus musculus GN=Ap2a1	7.73726e+06	6.95943e+06	7.49508e+06	7.44051e+06	6.86908e+06	6.70159e+06	7.05586e+06	6.59335e+06	6.90131e+06	6.57229e+06	-0.250016	0.138882
P17427	Ap2a2	AP-2 complex subunit alpha-2 OS=Mus musculus GN=Ap2a2 PE=1 SV=2	1.85436e+07	1.5898e+07	1.58277e+07	1.5184e+07	1.58017e+07	1.92747e+07	1.884e+07	1.71916e+07	1.81461e+07	1.73599e+07	0.287939	0.0958691
P17439	Gba	Glucosylceramidase OS=Mus musculus GN=Gba PE=1 SV=1	2.38004e+06	2.33848e+06	2.28923e+06	2.38028e+06	2.4268e+06	2.34379e+06	2.28995e+06	2.50747e+06	2.2471e+06	2.36414e+06	-0.0349364	0.907627
P17563	Selenbp1	Selenium-binding protein 1 OS=Mus musculus GN=Selenbp1 PE=1 SV=2	6.84206e+06	7.76935e+06	6.23112e+06	7.56698e+06	7.2448e+06	8.77964e+06	8.23969e+06	7.4472e+06	7.06205e+06	7.88287e+06	0.177266	0.210626
P17665	Cox7c	"Cytochrome c oxidase subunit 7C, mitochondrial OS=Mus musculus GN=Cox7c PE=1 SV=1"	1.01436e+07	1.19179e+07	8.66371e+06	1.01505e+07	9.54142e+06	1.09684e+07	1.06451e+07	8.18411e+06	7.46146e+06	9.90798e+06	-0.0528858	0.563519
P17710	Hk1	Isoform HK1-SB of Hexokinase-1 OS=Mus musculus GN=Hk1	5.23036e+06	4.38862e+06	5.26499e+06	5.06191e+06	4.42182e+06	4.46127e+06	4.21453e+06	4.19486e+06	4.21627e+06	4.24014e+06	-0.469382	0.0670142
P17717	Ugt2b17	UDP-glucuronosyltransferase 2B17 OS=Mus musculus GN=Ugt2b17 PE=2 SV=1	478701	433698	827142	607057	445928	205748	176108	214779	324077	306798	-2.11245	0.00935005
P17742	Ppia	Peptidyl-prolyl cis-trans isomerase A OS=Mus musculus GN=Ppia PE=1 SV=2	8.69143e+07	8.4349e+07	8.27034e+07	8.7467e+07	8.10746e+07	9.07805e+07	9.64127e+07	9.16005e+07	9.03242e+07	8.83775e+07	0.17582	0.0886186
P17751	Tpi1	Triosephosphate isomerase OS=Mus musculus GN=Tpi1 PE=1 SV=4	5.00075e+07	4.27851e+07	3.63746e+07	4.86563e+07	3.38077e+07	6.34422e+07	6.59666e+07	5.26116e+07	5.09519e+07	5.16458e+07	0.473284	0.0422431
P17809	Slc2a1	"Solute carrier family 2, facilitated glucose transporter member 1 OS=Mus musculus GN=Slc2a1 PE=1 SV=4"	339589	250487	367071	262114	220083	188549	230785	213078	247086	193176	-0.531573	0.0768304
P17897	Lyz1	Lysozyme C-1 OS=Mus musculus GN=Lyz1 PE=1 SV=1	192801	219655	169054	574890	187731	184157	206104	190734	210513	201213	0.0756542	0.533129
P17918	Pcna	Proliferating cell nuclear antigen OS=Mus musculus GN=Pcna PE=1 SV=2	2.84063e+06	3.06731e+06	2.72729e+06	3.12827e+06	2.65957e+06	2.62303e+06	2.5682e+06	2.39457e+06	2.7422e+06	2.4971e+06	-0.235866	0.080973
P18052	Ptpra	Isoform 2 of Receptor-type tyrosine-protein phosphatase alpha OS=Mus musculus GN=Ptpra	1.80912e+06	1.68969e+06	1.67441e+06	2.06705e+06	1.6268e+06	1.87663e+06	1.86825e+06	1.80226e+06	1.87871e+06	1.84926e+06	0.234194	0.46343
P18155	Mthfd2	"Bifunctional methylenetetrahydrofolate dehydrogenase/cyclohydrolase, mitochondrial OS=Mus musculus GN=Mthfd2 PE=1 SV=1"	237800	192856	214098	248037	136630	160955	190130	163604	181046	124812	-0.605081	0.212613
P18181	Cd48	CD48 antigen OS=Mus musculus GN=Cd48 PE=1 SV=1	518482	401898	552817	400316	527389	466661	432602	764186	654299	496649	-0.103411	0.398142
P18242	Ctsd	Cathepsin D OS=Mus musculus GN=Ctsd PE=1 SV=1	2.31993e+07	2.86616e+07	2.06946e+07	2.70004e+07	2.53129e+07	3.42251e+07	3.80401e+07	3.39432e+07	3.08137e+07	2.86867e+07	0.620622	0.0246466
P18293	Npr1	Atrial natriuretic peptide receptor 1 OS=Mus musculus GN=Npr1 PE=2 SV=2	1.04357e+06	1.07955e+06	988125	1.01812e+06	977173	1.09294e+06	1.14991e+06	1.02021e+06	1.06867e+06	1.0981e+06	0.143003	0.215781
P18419	Svs4	Seminal vesicle secretory protein 4 OS=Mus musculus GN=Svs4 PE=1 SV=2	1.43255e+07	3.16643e+08	1.27618e+07	1405944360	1.16295e+07	1.36566e+07	1.29748e+07	1.38397e+07	1.35928e+07	1.78054e+07	0.00190357	0.256768
P18524	NA	Ig heavy chain V region RF OS=Mus musculus PE=1 SV=1	207249	320229	315319	354397	173036	131936	146644	276306	126935	157035	-1.88153	0.0784533
P18572	Bsg	Isoform 2 of Basigin OS=Mus musculus GN=Bsg	9.64997e+06	1.19575e+07	8.85555e+06	1.06807e+07	9.82844e+06	1.11128e+07	1.14393e+07	1.0016e+07	1.0412e+07	1.13871e+07	0.265136	0.405663
P18608	Hmgn1	Non-histone chromosomal protein HMG-14 OS=Mus musculus GN=Hmgn1 PE=1 SV=2	110537	177510	104251	201756	139501	119310	114435	93730.4	132547	125538	-0.379299	0.288737
P18653	Rps6ka1	Ribosomal protein S6 kinase alpha-1 OS=Mus musculus GN=Rps6ka1 PE=1 SV=1	716018	705241	625314	687193	596059	780121	807845	605564	718992	675938	0.0602266	0.416168
P18654	Rps6ka3	Ribosomal protein S6 kinase alpha-3 OS=Mus musculus GN=Rps6ka3 PE=1 SV=2	1.51396e+07	1.49149e+07	1.36478e+07	1.48434e+07	1.37457e+07	1.76836e+07	1.77202e+07	1.67726e+07	1.65036e+07	1.70242e+07	0.30517	0.0111281
P18760	Cfl1	Cofilin-1 OS=Mus musculus GN=Cfl1 PE=1 SV=3	2.98812e+07	3.21769e+07	2.50112e+07	3.36469e+07	2.19038e+07	4.39893e+07	4.66516e+07	3.33304e+07	3.47039e+07	3.62082e+07	0.434126	0.0490814
P18872-2	Gnao1	Isoform Alpha-2 of Guanine nucleotide-binding protein G(o) subunit alpha OS=Mus musculus GN=Gnao1	2.47614e+06	1.81025e+06	2.14828e+06	2.38368e+06	1.34431e+06	2.03444e+06	2.34607e+06	2.45652e+06	2.1149e+06	2.14421e+06	-0.00551948	0.485329
P18894	Dao	D-amino-acid oxidase OS=Mus musculus GN=Dao PE=1 SV=3	1.6936e+06	496622	1.35972e+06	539741	156636	237645	979439	80423.6	1.07629e+06	165010	-3.41398	0.431383
P19091	Ar	Androgen receptor OS=Mus musculus GN=Ar PE=1 SV=1	77505.1	89872.5	92290.1	80535.5	88834.4	59545.8	63067.2	66730.4	75614.5	74536.8	-0.666852	0.0212547
P19096	Fasn	Fatty acid synthase OS=Mus musculus GN=Fasn PE=1 SV=2	3.76287e+08	9.09894e+08	5.42811e+08	3.70882e+08	9.2026e+08	4.09549e+08	485857940	4.22295e+08	3.58839e+08	4.51879e+08	-0.560146	0.258414
P19157	Gstp1	Glutathione S-transferase P 1 OS=Mus musculus GN=Gstp1 PE=1 SV=2	1.35395e+07	1.51183e+07	1.48694e+07	1.5996e+07	1.37956e+07	1.29904e+07	1.34044e+07	1.36009e+07	1.43524e+07	1.50231e+07	-0.210559	0.38258
P19221	F2	Prothrombin OS=Mus musculus GN=F2 PE=1 SV=1	1.28293e+07	1.35161e+07	1.2725e+07	1.32677e+07	1.17188e+07	1.44556e+07	1.41121e+07	1.32095e+07	1.27159e+07	1.37537e+07	0.154502	0.256768
P19253	Rpl13a	60S ribosomal protein L13a OS=Mus musculus GN=Rpl13a PE=1 SV=4	1.2998e+07	5.25849e+06	1.24784e+07	5.1255e+06	1.12649e+07	1.20422e+07	1.21034e+07	1.22493e+07	1.13632e+07	1.17736e+07	0.146263	0.255628
P19258	Mpv17	Protein Mpv17 OS=Mus musculus GN=Mpv17 PE=2 SV=1	1.41549e+06	1.45383e+06	1.50363e+06	1.44485e+06	1.47092e+06	1.15369e+06	1.20928e+06	1.2309e+06	1.12042e+06	1.31197e+06	-0.45741	0.00897587
P19324	Serpinh1	Serpin H1 OS=Mus musculus GN=Serpinh1 PE=1 SV=3	3.31234e+07	2.14036e+07	19973841	2.13866e+07	2.43353e+07	4.03403e+07	3.55014e+07	3.37695e+07	3.2391e+07	3.08856e+07	1.06205	0.0241804
P19426-2	Nelfe	Isoform 2 of Negative elongation factor E OS=Mus musculus GN=Nelfe	36439.3	37353.5	43427.6	37441.9	44826.5	29644.1	31136.2	39207.1	36286.9	31910.8	-0.443172	0.0874826
P19536	Cox5b	"Cytochrome c oxidase subunit 5B, mitochondrial OS=Mus musculus GN=Cox5b PE=1 SV=1"	1.02137e+07	1.23168e+07	1.00125e+07	1.12379e+07	1.09377e+07	1.00992e+07	1.03035e+07	9.90411e+06	9.82352e+06	9.84637e+06	-0.243983	0.157409
P19783	Cox4i1	"Cytochrome c oxidase subunit 4 isoform 1, mitochondrial OS=Mus musculus GN=Cox4i1 PE=1 SV=2"	1.27143e+07	1.4337e+07	1.17601e+07	1.1824e+07	1.29792e+07	1.06611e+07	1.12187e+07	1.153e+07	1.11182e+07	1.12121e+07	-0.288008	0.056786
P19785	Esr1	Estrogen receptor OS=Mus musculus GN=Esr1 PE=1 SV=1	36615.1	32420.5	30088.4	21823.6	26191	23077.9	26573.8	20446.1	29715.5	19581.3	-0.653717	0.2006
P19973	Lsp1	Lymphocyte-specific protein 1 OS=Mus musculus GN=Lsp1 PE=1 SV=2	5.41573e+06	5.08052e+06	3.89942e+06	5.55739e+06	3.4838e+06	5.59973e+06	5.88097e+06	4.82375e+06	5.63396e+06	4.86174e+06	0.21068	0.283594
P20029	Hspa5	78 kDa glucose-regulated protein OS=Mus musculus GN=Hspa5 PE=1 SV=3	6.50029e+07	6.26596e+07	58935257	6.31264e+07	5.94407e+07	7.3114e+07	7.05586e+07	6.28947e+07	6.31152e+07	6.38498e+07	0.042357	0.211553
P20060	Hexb	Beta-hexosaminidase subunit beta OS=Mus musculus GN=Hexb PE=2 SV=2	4.86582e+06	4.74259e+06	4.69762e+06	4.91631e+06	4.18992e+06	4.47545e+06	4.57142e+06	4.5174e+06	4.61688e+06	4.46626e+06	-0.119847	0.541021
P20108	Prdx3	"Thioredoxin-dependent peroxide reductase, mitochondrial OS=Mus musculus GN=Prdx3 PE=1 SV=1"	1.27097e+07	1.55624e+07	1.23814e+07	1.14261e+07	1.32357e+07	1.50284e+07	1.48948e+07	1.44716e+07	1.33655e+07	1.3772e+07	0.273666	0.239455
P20152	Vim	Vimentin OS=Mus musculus GN=Vim PE=1 SV=3	210821469	8.46552e+07	1.75231e+08	1.03687e+08	2.04776e+08	2.55891e+08	2.90385e+08	2.47849e+08	264901070	2.55236e+08	0.823584	0.0413068
P20352	F3	Tissue factor OS=Mus musculus GN=F3 PE=1 SV=2	568255	541394	638620	603647	618296	473562	425590	609796	428676	501660	-0.615968	0.0641725
P20444	Prkca	Protein kinase C alpha type OS=Mus musculus GN=Prkca PE=1 SV=3	691350	535660	506126	538297	515310	697612	798194	694241	860989	668499	0.649363	0.0223952
P20782	Chrne	Acetylcholine receptor subunit epsilon OS=Mus musculus GN=Chrne PE=2 SV=1	676369	738810	477064	581747	460646	798589	854972	575694	578756	608364	0.0957139	0.354215
P20801	Tnnc2	"Troponin C, skeletal muscle OS=Mus musculus GN=Tnnc2 PE=1 SV=2"	71611.4	43754.9	42702.6	38035	39368.6	125677	28520.3	60491.4	86546.4	64503.7	1.02862	0.30796
P20918	Plg	Plasminogen OS=Mus musculus GN=Plg PE=1 SV=3	1.4285e+07	1.41665e+07	1.51867e+07	1.25952e+07	1.38486e+07	1.84251e+07	1.60066e+07	1.55506e+07	1.41384e+07	1.63712e+07	0.284752	0.093399
P21107-2	Tpm3	Isoform 2 of Tropomyosin alpha-3 chain OS=Mus musculus GN=Tpm3	4.32844e+06	4.87883e+06	4.7906e+06	3.49945e+06	5.08876e+06	4.45775e+06	4.42477e+06	4.29991e+06	4.45718e+06	4.10246e+06	-0.170723	0.769501
P21107	Tpm3	Tropomyosin alpha-3 chain OS=Mus musculus GN=Tpm3 PE=1 SV=3	345539	318857	376610	294512	366216	399016	439581	326152	357517	390941	0.277417	0.225716
P21126	Ubl4a	Ubiquitin-like protein 4A OS=Mus musculus GN=Ubl4a PE=2 SV=1	1.22693e+06	1.24341e+06	1.00502e+06	1.29953e+06	1.08344e+06	1.51552e+06	1.52156e+06	1.3258e+06	1.12128e+06	1.30443e+06	0.157224	0.1661
P21180	C2	Complement C2 OS=Mus musculus GN=C2 PE=2 SV=2	5.17647e+06	4.73813e+06	4.16239e+06	5.24692e+06	4.75305e+06	3.59323e+06	3.50479e+06	3.94102e+06	3.89316e+06	4.21871e+06	-0.460166	0.0191269
P21278	Gna11	Guanine nucleotide-binding protein subunit alpha-11 OS=Mus musculus GN=Gna11 PE=1 SV=1	7.91268e+06	7.90415e+06	6.74654e+06	8.38206e+06	7.92405e+06	7.3181e+06	6.9488e+06	7.30689e+06	6.99382e+06	8.12156e+06	-0.189183	0.41144
P21279	Gnaq	Guanine nucleotide-binding protein G(q) subunit alpha OS=Mus musculus GN=Gnaq PE=1 SV=4	6.77624e+06	9.10763e+06	7.93834e+06	5.36422e+06	1.00173e+07	5.34878e+06	5.5881e+06	6.0912e+06	5.92911e+06	6.02947e+06	-0.645816	0.0855823
P21300	Akr1b7	Aldose reductase-related protein 1 OS=Mus musculus GN=Akr1b7 PE=2 SV=4	2.78636e+06	2.40897e+06	2.24067e+06	2.35118e+06	2.18691e+06	2.35529e+06	2.43807e+06	2.54133e+06	2.41968e+06	8.32868e+06	0.164917	0.412206
P21447	Abcb1a	Multidrug resistance protein 1A OS=Mus musculus GN=Abcb1a PE=1 SV=3	1.45715e+06	1.53902e+06	1.49262e+06	1.71582e+06	1.61451e+06	1.21137e+06	1.29726e+06	1.35446e+06	1.38642e+06	1.45893e+06	-0.298664	0.0429991
P21460	Cst3	Cystatin-C OS=Mus musculus GN=Cst3 PE=2 SV=2	594145	1.31019e+06	618816	3.83591e+06	469374	544634	590995	619646	571765	602026	-0.146216	0.310626
P21550	Eno3	Beta-enolase OS=Mus musculus GN=Eno3 PE=1 SV=3	2.49269e+06	3.8126e+06	2.21728e+06	2.53465e+06	2.72654e+06	2.7342e+06	2.39765e+06	2.53061e+06	2.39338e+06	2.62104e+06	-0.0312354	0.606544
P21570	Ang	Angiogenin OS=Mus musculus GN=Ang PE=1 SV=1	764527	735368	706683	794678	702497	744953	714215	744781	701283	695653	-0.0675238	0.587256
P21614	Gc	Vitamin D-binding protein OS=Mus musculus GN=Gc PE=1 SV=2	1.90462e+07	1.91684e+07	1.92867e+07	1.97755e+07	1.56407e+07	1.99467e+07	1.8576e+07	1.82903e+07	1.67745e+07	1.82517e+07	-0.111484	0.908431
P21619	Lmnb2	Lamin-B2 OS=Mus musculus GN=Lmnb2 PE=1 SV=2	7.71679e+06	4.60364e+06	6.4076e+06	4.789e+06	5.31144e+06	4.27631e+06	4.47028e+06	5.47267e+06	6.66143e+06	4.4987e+06	-0.425873	0.467526
P21765	Gpx5	Epididymal secretory glutathione peroxidase OS=Mus musculus GN=Gpx5 PE=2 SV=3	204869	125418	143868	173740	112587	106914	134293	160099	113620	119286	-0.463902	0.327694
P21956	Mfge8	Isoform 2 of Lactadherin OS=Mus musculus GN=Mfge8	4.17384e+06	3.28168e+06	3.18809e+06	3.74865e+06	3.198e+06	3.54856e+06	4.12016e+06	3.78829e+06	3.84395e+06	3.57205e+06	0.321402	0.381509
P21958	Tap1	Antigen peptide transporter 1 OS=Mus musculus GN=Tap1 PE=2 SV=3	2.21999e+06	2.44006e+06	2.20159e+06	3.2104e+06	2.26066e+06	2.30714e+06	2.20567e+06	2.20365e+06	2.25295e+06	2.42238e+06	-0.0308492	0.493025
P21981	Tgm2	Protein-glutamine gamma-glutamyltransferase 2 OS=Mus musculus GN=Tgm2 PE=1 SV=4	2.37215e+07	1.75597e+07	2.30355e+07	1.94821e+07	1.34254e+07	1.73928e+07	1.53766e+07	2.11299e+07	1.86922e+07	2.22508e+07	-0.136781	0.946776
P21995	Emb	Embigin OS=Mus musculus GN=Emb PE=1 SV=2	942307	875218	797216	1.09014e+06	778599	864966	952414	873190	789478	810257	-0.0246761	0.698981
P22315	Fech	"Ferrochelatase, mitochondrial OS=Mus musculus GN=Fech PE=1 SV=2"	4.78912e+06	5.1189e+06	5.12471e+06	5.03558e+06	5.10533e+06	4.64915e+06	4.94126e+06	4.87779e+06	5.01331e+06	5.04494e+06	-0.0789318	0.545441
P22366-2	Myd88	Isoform 2 of Myeloid differentiation primary response protein MyD88 OS=Mus musculus GN=Myd88	48739.2	48355.6	73635.2	48646.6	70069.5	47597.1	41138.7	60323.9	54686	46107.7	-0.0743988	0.380449
P22437	Ptgs1	Prostaglandin G/H synthase 1 OS=Mus musculus GN=Ptgs1 PE=2 SV=1	1.66957e+06	1.87097e+06	1.82563e+06	1.93876e+06	1.66672e+06	1.99911e+06	1.82087e+06	1.95688e+06	1.56818e+06	1.97339e+06	0.138789	0.658366
P22599	Serpina1b	Alpha-1-antitrypsin 1-2 OS=Mus musculus GN=Serpina1b PE=1 SV=2	2.59775e+07	2.31307e+07	2.44231e+07	2.60146e+07	1.99559e+07	2.47266e+07	2.64294e+07	2.40946e+07	2.60438e+07	2.59986e+07	0.125252	0.377666
P22682	Cbl	E3 ubiquitin-protein ligase CBL OS=Mus musculus GN=Cbl PE=1 SV=3	1.27707e+06	1.20015e+06	1.25431e+06	1.29689e+06	1.18234e+06	1.45324e+06	1.44681e+06	1.30582e+06	1.28389e+06	1.30086e+06	0.0775613	0.123661
P22892	Ap1g1	AP-1 complex subunit gamma-1 OS=Mus musculus GN=Ap1g1 PE=1 SV=3	5.17767e+06	5.25822e+06	5.18777e+06	5.21852e+06	4.86313e+06	5.4944e+06	5.47046e+06	5.25464e+06	5.03092e+06	5.0755e+06	0.0147359	0.612835
P22907	Hmbs	Isoform 2 of Porphobilinogen deaminase OS=Mus musculus GN=Hmbs	1.30965e+06	1.47611e+06	1.40715e+06	1.57135e+06	1.41174e+06	1.3411e+06	1.32359e+06	1.32755e+06	1.29907e+06	1.30872e+06	-0.16128	0.136068
P23116	Eif3a	Eukaryotic translation initiation factor 3 subunit A OS=Mus musculus GN=Eif3a PE=1 SV=5	2.72325e+07	2.63606e+07	2.76812e+07	1.24583e+07	2.8308e+07	2.96069e+07	2.97218e+07	2.89564e+07	2.94241e+07	2.86391e+07	0.151613	0.283594
P23198	Cbx3	Chromobox protein homolog 3 OS=Mus musculus GN=Cbx3 PE=1 SV=2	2.62675e+06	2.35805e+06	2.26226e+06	2.26502e+06	1.93714e+06	2.55635e+06	2.47281e+06	2.17277e+06	2.51053e+06	2.49504e+06	0.198381	0.411233
P23242	Gja1	Gap junction alpha-1 protein OS=Mus musculus GN=Gja1 PE=1 SV=2	1.70847e+06	1.11644e+06	1.45631e+06	1.07688e+06	953158	1.20809e+06	1.52226e+06	1.11957e+06	1.57597e+06	1.12018e+06	0.190982	0.792958
P23249	Mov10	Putative helicase MOV-10 OS=Mus musculus GN=Mov10 PE=1 SV=2	2.25879e+06	1.90266e+06	2.4081e+06	1.51861e+06	2.31543e+06	2.19413e+06	2.23489e+06	2.2621e+06	2.37094e+06	2.30703e+06	-0.00968811	0.384997
P23298	Prkch	Protein kinase C eta type OS=Mus musculus GN=Prkch PE=1 SV=2	191934	222997	227820	212736	233323	217983	238386	216370	207800	219617	-0.0488394	0.86857
P23336	Ggta1	"Isoform 2 of N-acetyllactosaminide alpha-1,3-galactosyltransferase OS=Mus musculus GN=Ggta1"	207185	182806	273961	197456	283594	133933	141440	208286	194429	139600	-0.982265	0.0708163
P23475	Xrcc6	X-ray repair cross-complementing protein 6 OS=Mus musculus GN=Xrcc6 PE=1 SV=5	1.0534e+06	781307	986287	567196	811238	812845	830530	869157	896125	782169	0.0388893	0.908431
P23492	Pnp	Purine nucleoside phosphorylase OS=Mus musculus GN=Pnp PE=1 SV=2	2.29319e+07	2.24143e+07	2.06011e+07	2.7046e+07	2.1778e+07	2.55698e+07	2.29157e+07	2.46526e+07	2.17565e+07	2.44362e+07	0.201627	0.600431
P23506-2	Pcmt1	Isoform 2 of Protein-L-isoaspartate(D-aspartate) O-methyltransferase OS=Mus musculus GN=Pcmt1	3.11413e+06	3.31822e+06	3.01201e+06	3.90228e+06	3.04596e+06	3.72998e+06	3.75697e+06	3.52221e+06	3.38686e+06	3.52026e+06	0.275445	0.223576
P23591	Tsta3	GDP-L-fucose synthase OS=Mus musculus GN=Tsta3 PE=2 SV=3	507970	560780	530553	622079	508973	521439	495113	498038	527514	507495	-0.107324	0.290129
P23780	Glb1	Beta-galactosidase OS=Mus musculus GN=Glb1 PE=2 SV=1	5.57545e+06	5.983e+06	5.16731e+06	6.1712e+06	5.55928e+06	6.68788e+06	6.79162e+06	5.93673e+06	5.96202e+06	6.49582e+06	0.338528	0.097855
P23798	Pcgf2	Polycomb group RING finger protein 2 OS=Mus musculus GN=Pcgf2 PE=1 SV=2	172965	157352	153849	166133	150428	155065	158343	160798	166120	155405	0.0152197	0.928296
P23927	Cryab	Alpha-crystallin B chain OS=Mus musculus GN=Cryab PE=1 SV=2	654220	564701	536834	657212	488255	827780	920015	550737	659858	582467	0.360936	0.228435
P23949	Zfp36l2	"Zinc finger protein 36, C3H1 type-like 2 OS=Mus musculus GN=Zfp36l2 PE=1 SV=2"	51978.6	41223.4	61304.4	31154.6	50079.2	32883.4	29825.8	43088.9	43980.6	34423.5	-0.905686	0.21082
P23953	Ces1c	Carboxylesterase 1C OS=Mus musculus GN=Ces1c PE=1 SV=4	5.27262e+07	4.628e+07	4.40628e+07	5.19706e+07	3.6152e+07	5.4649e+07	4.44132e+07	4.58634e+07	3.9579e+07	4.41891e+07	-0.0965096	0.957872
P24270	Cat	Catalase OS=Mus musculus GN=Cat PE=1 SV=4	5.18154e+07	4.992e+07	4.70549e+07	5.06709e+07	4.93869e+07	4.6181e+07	5.13629e+07	4.44254e+07	4.67112e+07	4.8469e+07	-0.157078	0.343018
P24369	Ppib	Peptidyl-prolyl cis-trans isomerase B OS=Mus musculus GN=Ppib PE=1 SV=2	1.848e+07	1.7876e+07	1.72897e+07	1.98564e+07	1.75294e+07	2.21982e+07	2.04978e+07	1.91692e+07	1.80807e+07	1.88266e+07	0.15091	0.230942
P24452	Capg	Macrophage-capping protein OS=Mus musculus GN=Capg PE=1 SV=2	4.34572e+06	4.55546e+06	5.57539e+06	5.17768e+06	4.99209e+06	4.15824e+06	4.39757e+06	4.21544e+06	4.20864e+06	3.81112e+06	-0.392698	0.04882
P24457	Cyp2d11	Cytochrome P450 2D11 OS=Mus musculus GN=Cyp2d11 PE=2 SV=2	193380	219554	260096	215890	216531	98805.1	75779.5	114735	128462	104347	-1.87494	0.00295584
P24472	Gsta4	Glutathione S-transferase A4 OS=Mus musculus GN=Gsta4 PE=1 SV=3	4.17013e+06	4.79507e+06	4.50385e+06	4.64073e+06	4.22428e+06	3.60853e+06	3.83015e+06	3.9611e+06	4.01438e+06	4.09756e+06	-0.294477	0.0416304
P24527	Lta4h	Leukotriene A-4 hydrolase OS=Mus musculus GN=Lta4h PE=1 SV=4	2.32772e+07	2.32647e+07	2.10531e+07	2.56996e+07	1.86278e+07	2.67814e+07	2.56926e+07	2.36199e+07	2.33913e+07	2.46822e+07	0.136869	0.21082
P24547	Impdh2	Inosine-5'-monophosphate dehydrogenase 2 OS=Mus musculus GN=Impdh2 PE=1 SV=2	5.23353e+06	5.08371e+06	4.5484e+06	5.4733e+06	4.33651e+06	5.87365e+06	5.55878e+06	5.27789e+06	4.97519e+06	5.55005e+06	0.20207	0.191927
P24549	Aldh1a1	Retinal dehydrogenase 1 OS=Mus musculus GN=Aldh1a1 PE=1 SV=5	3.80154e+07	3.30282e+07	3.44776e+07	3.85619e+07	2.55547e+07	3.01583e+07	2.94194e+07	2.88155e+07	3.08349e+07	2.87934e+07	-0.361016	0.228243
P24638	Acp2	Lysosomal acid phosphatase OS=Mus musculus GN=Acp2 PE=2 SV=2	1.64758e+06	1.67035e+06	1.49968e+06	1.80541e+06	1.43523e+06	1.75186e+06	1.81168e+06	1.68083e+06	1.6754e+06	1.76573e+06	0.138734	0.242335
P24668	M6pr	Cation-dependent mannose-6-phosphate receptor OS=Mus musculus GN=M6pr PE=1 SV=1	5.65145e+06	5.93008e+06	5.46363e+06	5.96727e+06	6.30548e+06	6.09668e+06	6.08807e+06	5.94256e+06	6.02278e+06	6.50475e+06	0.0635634	0.378066
P24788	Cdk11b	Cyclin-dependent kinase 11B OS=Mus musculus GN=Cdk11b PE=1 SV=2	148719	145195	169524	95882.1	174321	158628	174755	152251	162325	153128	0.148622	0.463031
P25206	Mcm3	DNA replication licensing factor MCM3 OS=Mus musculus GN=Mcm3 PE=1 SV=2	570450	496756	650038	711455	561437	515545	524313	585972	591826	427113	-0.200891	0.296897
P25425-9	Pou2f1	"Isoform 10 of POU domain, class 2, transcription factor 1 OS=Mus musculus GN=Pou2f1"	345252	297997	324796	281222	275938	376528	340564	309500	330342	348179	0.31474	0.157409
P25444	Rps2	40S ribosomal protein S2 OS=Mus musculus GN=Rps2 PE=2 SV=3	2.52114e+07	1.08927e+07	3.02535e+07	8.0733e+06	2.55091e+07	27151134	3.00692e+07	2.56528e+07	3.03501e+07	2.89719e+07	0.306257	0.181891
P25446	Fas	Tumor necrosis factor receptor superfamily member 6 OS=Mus musculus GN=Fas PE=1 SV=2	276055	228399	241586	260816	251192	331461	351063	293849	305077	330759	0.612403	0.00999073
P25688	Uox	Uricase OS=Mus musculus GN=Uox PE=1 SV=2	1.99563e+06	1.60296e+06	2.4978e+06	2.31534e+06	1.39163e+06	1.5018e+06	704055	966138	1.19801e+06	1.19987e+06	-1.16935	0.0311765
P25785	Timp2	Metalloproteinase inhibitor 2 OS=Mus musculus GN=Timp2 PE=1 SV=2	136647	134477	145284	127462	118822	143465	138996	135961	130132	127456	0.0140465	0.749169
P25799	Nfkb1	Isoform 2 of Nuclear factor NF-kappa-B p105 subunit OS=Mus musculus GN=Nfkb1	2.60192e+06	2.35168e+06	2.55693e+06	1.97034e+06	2.40848e+06	2.72559e+06	2.52025e+06	2.71275e+06	2.59519e+06	2.52849e+06	0.140613	0.19762
P25911	Lyn	Tyrosine-protein kinase Lyn OS=Mus musculus GN=Lyn PE=1 SV=4	1.04352e+06	863539	918121	1.04625e+06	862444	831212	944426	856951	908079	937173	-0.0364135	0.470971
P25962	Adrb3	Beta-3 adrenergic receptor OS=Mus musculus GN=Adrb3 PE=2 SV=2	2.39083e+06	3.07032e+06	2.77314e+06	2.96188e+06	2.98357e+06	2.62743e+06	2.25924e+06	2.90164e+06	2.58786e+06	2.97955e+06	-0.293107	0.515505
P25976	Ubtf	Isoform UBF2 of Nucleolar transcription factor 1 OS=Mus musculus GN=Ubtf	151510	64528.8	114483	53725.4	89471	88030.7	85497.3	99890.6	161372	87735.6	-0.0657727	0.648076
P26039	Tln1	Talin-1 OS=Mus musculus GN=Tln1 PE=1 SV=2	8.35189e+07	7.54064e+07	7.50291e+07	8.15784e+07	7.36651e+07	8.41476e+07	8.64349e+07	7.6927e+07	8.01507e+07	8.09714e+07	0.155117	0.364971
P26040	Ezr	Ezrin OS=Mus musculus GN=Ezr PE=1 SV=3	5.63973e+06	4.19242e+06	5.59136e+06	4.46297e+06	3.89897e+06	4.50652e+06	5.06556e+06	3.94633e+06	5.31097e+06	3.93256e+06	-0.00048871	0.774511
P26041	Msn	Moesin OS=Mus musculus GN=Msn PE=1 SV=3	3.84105e+07	3.90247e+07	3.54968e+07	4.03529e+07	3.50795e+07	4.42431e+07	4.33887e+07	3.97581e+07	4.1897e+07	4.02094e+07	0.176942	0.0807293
P26043	Rdx	Radixin OS=Mus musculus GN=Rdx PE=1 SV=3	2.42367e+07	2.13251e+07	2.46717e+07	2.2677e+07	2.09183e+07	2.28743e+07	2.34455e+07	2.05195e+07	2.34002e+07	2.33158e+07	0.0264576	0.985147
P26187	Mgmt	Methylated-DNA--protein-cysteine methyltransferase OS=Mus musculus GN=Mgmt PE=1 SV=3	1.24147e+06	1.22069e+06	1.18669e+06	1.30338e+06	1.26353e+06	1.26956e+06	1.28783e+06	1.20976e+06	1.1454e+06	1.23769e+06	-0.0095076	0.835178
P26231	Ctnna1	Catenin alpha-1 OS=Mus musculus GN=Ctnna1 PE=1 SV=1	1.438e+07	1.04146e+07	1.18643e+07	8.31044e+06	1.01175e+07	1.21512e+07	1.37082e+07	1.06411e+07	1.3266e+07	1.15584e+07	0.363533	0.382593
P26262	Klkb1	Plasma kallikrein OS=Mus musculus GN=Klkb1 PE=1 SV=2	8.89112e+06	9.92242e+06	1.02236e+07	1.0613e+07	9.80041e+06	9.90892e+06	9.88455e+06	9.82196e+06	9.26443e+06	1.03129e+07	-0.0072958	0.952396
P26323	Fli1	Friend leukemia integration 1 transcription factor OS=Mus musculus GN=Fli1 PE=1 SV=1	295189	245330	257468	229375	231116	304161	320133	289601	294119	279720	0.405805	0.0480858
P26350	Ptma	Prothymosin alpha OS=Mus musculus GN=Ptma PE=1 SV=2	681980	609964	529486	463052	362469	662046	652162	403734	517740	474028	-0.0626111	0.892789
P26369	U2af2	Splicing factor U2AF 65 kDa subunit OS=Mus musculus GN=U2af2 PE=1 SV=3	4.31014e+06	3.34629e+06	4.08956e+06	3.00995e+06	3.43963e+06	2.849e+06	3.14446e+06	2.75692e+06	3.15748e+06	3.0283e+06	-0.306481	0.0781949
P26443	Glud1	"Glutamate dehydrogenase 1, mitochondrial OS=Mus musculus GN=Glud1 PE=1 SV=1"	4.61313e+07	4.82217e+07	4.47532e+07	5.16407e+07	4.30362e+07	4.33745e+07	4.85218e+07	4.43667e+07	4.51308e+07	4.13036e+07	-0.100407	0.450189
P26450	Pik3r1	Phosphatidylinositol 3-kinase regulatory subunit alpha OS=Mus musculus GN=Pik3r1 PE=1 SV=2	5.05897e+06	5.44347e+06	5.09561e+06	5.04399e+06	5.08435e+06	4.43781e+06	4.58833e+06	4.77653e+06	4.83415e+06	4.74744e+06	-0.167688	0.0551929
P26516	Psmd7	26S proteasome non-ATPase regulatory subunit 7 OS=Mus musculus GN=Psmd7 PE=1 SV=2	4.23012e+06	3.94388e+06	3.36119e+06	3.87556e+06	3.96372e+06	4.79067e+06	5.72822e+06	3.98714e+06	5.47128e+06	4.42058e+06	0.398245	0.0573791
P26618	Pdgfra	Platelet-derived growth factor receptor alpha OS=Mus musculus GN=Pdgfra PE=1 SV=3	801056	689601	819919	712848	647440	509521	605258	553968	595891	555334	-0.642489	0.0134504
P26638	Sars	"Serine--tRNA ligase, cytoplasmic OS=Mus musculus GN=Sars PE=2 SV=3"	1.55742e+07	1.66658e+07	1.83241e+07	1.74973e+07	1.79482e+07	1.43387e+07	1.47414e+07	1.56873e+07	1.47321e+07	1.43956e+07	-0.441617	0.0255151
P26645	Marcks	Myristoylated alanine-rich C-kinase substrate OS=Mus musculus GN=Marcks PE=1 SV=2	3.44578e+06	2.97966e+06	2.63841e+06	2.41587e+06	2.26232e+06	4.14046e+06	3.55702e+06	3.53991e+06	3.35559e+06	3.68824e+06	0.686324	0.0307188
P26883	Fkbp1a	Peptidyl-prolyl cis-trans isomerase FKBP1A OS=Mus musculus GN=Fkbp1a PE=1 SV=2	6.25484e+06	8.41393e+06	7.78091e+06	9.83972e+06	8.52727e+06	7.73436e+06	8.22139e+06	8.93938e+06	8.42678e+06	8.75786e+06	-0.00691768	0.723193
P27046	Man2a1	Alpha-mannosidase 2 OS=Mus musculus GN=Man2a1 PE=1 SV=2	8.31901e+06	8.15544e+06	7.69198e+06	7.91562e+06	6.75223e+06	7.3677e+06	7.12489e+06	7.30603e+06	7.40108e+06	6.85412e+06	-0.233486	0.245786
P27546	Map4	Microtubule-associated protein 4 OS=Mus musculus GN=Map4 PE=1 SV=3	1.61593e+07	1.73477e+07	1.60726e+07	1.90043e+07	1.66861e+07	2.27048e+07	2.23834e+07	1.96397e+07	1.9799e+07	2.02417e+07	0.419184	0.0166292
P27600	Gna12	Guanine nucleotide-binding protein subunit alpha-12 OS=Mus musculus GN=Gna12 PE=1 SV=3	343651	406756	362775	402520	422932	352911	349517	373637	368092	333749	-0.31925	0.21082
P27601	Gna13	Guanine nucleotide-binding protein subunit alpha-13 OS=Mus musculus GN=Gna13 PE=1 SV=1	5.039e+06	4.59121e+06	4.72296e+06	5.36671e+06	4.47867e+06	4.78273e+06	4.79271e+06	4.56604e+06	4.55285e+06	4.82005e+06	0.027724	0.649379
P27612	Plaa	Phospholipase A-2-activating protein OS=Mus musculus GN=Plaa PE=1 SV=4	8.2682e+06	8.71433e+06	7.99414e+06	9.21039e+06	8.41913e+06	7.96612e+06	8.0874e+06	8.22224e+06	8.51755e+06	8.59534e+06	-0.0740963	0.581525
P27641	Xrcc5	X-ray repair cross-complementing protein 5 OS=Mus musculus GN=Xrcc5 PE=2 SV=4	1.44747e+06	1.22246e+06	1.56628e+06	990083	1.17543e+06	1.20732e+06	1.23218e+06	1.24068e+06	1.26678e+06	1.2167e+06	0.0185061	0.834914
P27659	Rpl3	60S ribosomal protein L3 OS=Mus musculus GN=Rpl3 PE=1 SV=3	2.44855e+07	9.26495e+06	2.71151e+07	6.3964e+06	2.32598e+07	2.70435e+07	2.85258e+07	2.48055e+07	2.55977e+07	2.6221e+07	0.256763	0.180561
P27773	Pdia3	Protein disulfide-isomerase A3 OS=Mus musculus GN=Pdia3 PE=1 SV=2	1.02725e+08	1.05855e+08	1.04177e+08	119842255	1.07227e+08	1.20413e+08	1.19151e+08	1.05698e+08	1.02754e+08	1.0937e+08	0.0677817	0.633237
P27786	Cyp17a1	"Steroid 17-alpha-hydroxylase/17,20 lyase OS=Mus musculus GN=Cyp17a1 PE=2 SV=1"	36224.7	86797.8	30090.6	222134	30469.6	30908.2	33984.5	34811.3	31083.5	37991.9	-0.470616	0.28961
P27808	Mgat1	"Alpha-1,3-mannosyl-glycoprotein 2-beta-N-acetylglucosaminyltransferase OS=Mus musculus GN=Mgat1 PE=2 SV=1"	1.40514e+06	1.27806e+06	1.23654e+06	1.4141e+06	1.29978e+06	1.31752e+06	1.50394e+06	1.17036e+06	1.44542e+06	1.38472e+06	0.12945	0.74442
P27870	Vav1	Proto-oncogene vav OS=Mus musculus GN=Vav1 PE=1 SV=1	858015	745176	812056	706683	732103	885701	836632	766721	742218	759008	0.0578131	0.635751
P28063	Psmb8	Proteasome subunit beta type-8 OS=Mus musculus GN=Psmb8 PE=1 SV=2	3.58097e+06	3.65837e+06	3.539e+06	3.67465e+06	3.27305e+06	3.51096e+06	3.42731e+06	3.18268e+06	3.33821e+06	3.52783e+06	-0.100767	0.401236
P28076	Psmb9	Proteasome subunit beta type-9 OS=Mus musculus GN=Psmb9 PE=1 SV=1	852920	861164	851456	963038	852755	843174	801120	818636	835233	858798	-0.0685612	0.293787
P28271	Aco1	Cytoplasmic aconitate hydratase OS=Mus musculus GN=Aco1 PE=1 SV=3	3.37738e+07	3.73184e+07	3.2584e+07	3.57139e+07	3.25052e+07	3.61426e+07	3.52439e+07	3.48256e+07	3.57138e+07	3.64221e+07	0.110205	0.448673
P28352	Apex1	DNA-(apurinic or apyrimidinic site) lyase OS=Mus musculus GN=Apex1 PE=1 SV=2	1.1356e+07	1.32326e+07	1.01439e+07	1.31211e+07	9.9515e+06	1.09455e+07	1.00896e+07	9.90404e+06	9.78383e+06	1.03943e+07	-0.279076	0.202772
P28474	Adh5	Alcohol dehydrogenase class-3 OS=Mus musculus GN=Adh5 PE=1 SV=3	3.34919e+07	2.54722e+07	2.82884e+07	2.80817e+07	2.45128e+07	2.80125e+07	2.59e+07	2.32016e+07	2.31936e+07	2.99428e+07	-0.181241	0.492889
P28650	Adssl1	Isoform 2 of Adenylosuccinate synthetase isozyme 1 OS=Mus musculus GN=Adssl1	20081.9	16896.7	20546.5	20106.4	25292.6	20689.3	17458.3	20797.9	15470.4	26211.3	0.0487017	0.850283
P28653	Bgn	Biglycan OS=Mus musculus GN=Bgn PE=2 SV=1	1.75272e+07	7.44759e+06	2.05336e+07	4.7725e+06	1.2893e+07	1.76107e+07	1.70378e+07	1.48954e+07	1.6935e+07	1.73535e+07	0.613341	0.24632
P28654	Dcn	Decorin OS=Mus musculus GN=Dcn PE=2 SV=1	7.17929e+07	3.5961e+07	8.06614e+07	7.99294e+06	5.24962e+07	5.44672e+07	4.64607e+07	6.26045e+07	5.25771e+07	6.77318e+07	0.0690604	0.499464
P28656	Nap1l1	Nucleosome assembly protein 1-like 1 OS=Mus musculus GN=Nap1l1 PE=1 SV=2	4.38471e+06	4.29619e+06	3.82038e+06	4.44033e+06	3.6566e+06	7.19875e+06	6.72229e+06	5.48399e+06	5.80273e+06	6.59796e+06	0.994128	0.00396931
P28658	Atxn10	Ataxin-10 OS=Mus musculus GN=Atxn10 PE=1 SV=2	8.45892e+06	8.3312e+06	7.52433e+06	8.46593e+06	8.8965e+06	8.93651e+06	9.57481e+06	8.24005e+06	8.83636e+06	8.59962e+06	0.0825371	0.321272
P28659-4	Celf1	Isoform 4 of CUGBP Elav-like family member 1 OS=Mus musculus GN=Celf1	1.04257e+06	1.31074e+06	1.00321e+06	2.87982e+06	893626	1.0624e+06	1.18477e+06	991766	1.01497e+06	985075	-0.0770294	0.455983
P28660	Nckap1	Nck-associated protein 1 OS=Mus musculus GN=Nckap1 PE=1 SV=2	9.15654e+06	9.29324e+06	9.20661e+06	9.14269e+06	8.95046e+06	9.99759e+06	9.95218e+06	9.43151e+06	9.46154e+06	9.67541e+06	0.109747	0.147579
P28661	Sep-04	Isoform 2 of Septin-4 OS=Mus musculus GN=Sept4	1.50755e+06	1.4686e+06	1.34579e+06	1.45466e+06	1.49288e+06	1.87814e+06	1.82835e+06	1.29446e+06	1.48781e+06	1.61872e+06	0.225827	0.308055
P28665	Mug1	Murinoglobulin-1 OS=Mus musculus GN=Mug1 PE=1 SV=3	5.32801e+07	6.27469e+07	6.22874e+07	5.43261e+07	5.32564e+07	7.78953e+07	5.64132e+07	6.89642e+07	6.73262e+07	8.69573e+07	0.513918	0.0767418
P28666	Mug2	Murinoglobulin-2 OS=Mus musculus GN=Mug2 PE=2 SV=2	85125.7	77315.4	83551.5	75087.2	89755.6	86518.5	88445.4	80335.3	86218.5	90360.1	0.0811136	0.396652
P28667	Marcksl1	MARCKS-related protein OS=Mus musculus GN=Marcksl1 PE=1 SV=2	813253	761941	967444	1.039e+06	632342	551296	537990	516220	558410	505642	-0.98831	0.0100351
P28700	Rxra	Retinoic acid receptor RXR-alpha OS=Mus musculus GN=Rxra PE=1 SV=1	101333	75673.6	102706	86839.6	76800.8	92152	94873.6	72311	94241.4	72365.5	0.10791	0.763443
P28704	Rxrb	Isoform Short of Retinoic acid receptor RXR-beta OS=Mus musculus GN=Rxrb	260134	270355	256751	263596	273021	266920	288214	266441	263824	294286	0.00473655	0.399369
P28740	Kif2a	Kinesin-like protein KIF2A OS=Mus musculus GN=Kif2a PE=1 SV=2	192382	178303	213758	160483	187726	188421	195884	188533	203050	176706	-0.00182743	0.762806
P28741	Kif3a	Kinesin-like protein KIF3A OS=Mus musculus GN=Kif3a PE=1 SV=2	739283	603799	738595	537945	771086	833544	739046	770437	803334	825103	0.168252	0.116746
P28798	Grn	Granulins OS=Mus musculus GN=Grn PE=1 SV=2	2.79579e+06	3.10771e+06	3.24677e+06	5.73184e+06	2.99549e+06	3.10066e+06	2.49188e+06	3.37122e+06	3.28399e+06	2.53196e+06	-0.00474866	0.401236
P28828	Ptprm	Receptor-type tyrosine-protein phosphatase mu OS=Mus musculus GN=Ptprm PE=2 SV=2	2.63408e+06	2.6186e+06	2.74572e+06	2.78304e+06	2.71083e+06	2.8267e+06	2.76335e+06	2.70405e+06	2.60807e+06	2.87426e+06	0.0316455	0.648773
P28843	Dpp4	Dipeptidyl peptidase 4 OS=Mus musculus GN=Dpp4 PE=1 SV=3	8.90121e+06	1.10437e+07	9.56601e+06	1.01187e+07	1.12912e+07	1.02079e+07	1.0364e+07	9.9339e+06	1.069e+07	1.09252e+07	0.0281858	0.718491
P28867	Prkcd	Protein kinase C delta type OS=Mus musculus GN=Prkcd PE=1 SV=3	2.29303e+06	1.97263e+06	2.03867e+06	2.06998e+06	1.79373e+06	2.28432e+06	2.25889e+06	2.03272e+06	2.12139e+06	2.02936e+06	0.0750652	0.428378
P29341	Pabpc1	Polyadenylate-binding protein 1 OS=Mus musculus GN=Pabpc1 PE=1 SV=2	2.34136e+07	2.26423e+07	2.33021e+07	1.99696e+07	2.35277e+07	2.43377e+07	2.48833e+07	2.2971e+07	2.30464e+07	2.24353e+07	-0.0364473	0.464554
P29351	Ptpn6	Tyrosine-protein phosphatase non-receptor type 6 OS=Mus musculus GN=Ptpn6 PE=1 SV=2	3.47583e+06	3.3005e+06	3.62554e+06	4.13132e+06	3.03693e+06	3.41129e+06	3.34773e+06	2.98705e+06	3.31965e+06	3.08422e+06	-0.113184	0.328098
P29387	Gnb4	Guanine nucleotide-binding protein subunit beta-4 OS=Mus musculus GN=Gnb4 PE=2 SV=4	889856	822713	796993	1.22198e+06	654029	965509	1.13805e+06	1.12794e+06	966488	895008	0.385601	0.267983
P29391	Ftl1	Ferritin light chain 1 OS=Mus musculus GN=Ftl1 PE=1 SV=2	1.4051e+07	1.52419e+07	1.43481e+07	1.61434e+07	1.22353e+07	1.58714e+07	1.32143e+07	1.24298e+07	1.38966e+07	1.29742e+07	-0.195519	0.568146
P29416	Hexa	Beta-hexosaminidase subunit alpha OS=Mus musculus GN=Hexa PE=2 SV=2	2.73074e+06	2.7902e+06	2.79576e+06	2.7525e+06	2.7885e+06	2.7037e+06	2.65208e+06	2.63849e+06	2.52809e+06	2.37072e+06	-0.139091	0.131772
P29452	Casp1	Caspase-1 OS=Mus musculus GN=Casp1 PE=1 SV=1	1.33181e+06	1.28759e+06	1.19466e+06	1.44534e+06	1.16136e+06	1.38357e+06	1.37247e+06	1.16633e+06	1.17903e+06	1.28431e+06	-0.00506998	0.957751
P29533	Vcam1	Vascular cell adhesion protein 1 OS=Mus musculus GN=Vcam1 PE=1 SV=1	527803	494133	506776	514801	403908	482588	454877	482403	486589	452747	-0.120105	0.668438
P29595	Nedd8	NEDD8 OS=Mus musculus GN=Nedd8 PE=1 SV=2	703086	592340	577693	619420	563042	774611	662330	706053	635588	645199	0.264109	0.154425
P29621	Serpina3c	Serine protease inhibitor A3C OS=Mus musculus GN=Serpina3c PE=2 SV=1	1.01161e+06	937156	827258	874766	743322	1.19307e+06	1.23863e+06	1.02328e+06	1.00533e+06	907248	0.349121	0.084365
P29699	Ahsg	Alpha-2-HS-glycoprotein OS=Mus musculus GN=Ahsg PE=1 SV=1	4.94885e+07	4.65967e+07	4.60153e+07	5.41914e+07	3.82504e+07	4.80631e+07	4.21562e+07	4.6646e+07	4.18837e+07	4.76951e+07	-0.00841519	0.751652
P29758	Oat	"Ornithine aminotransferase, mitochondrial OS=Mus musculus GN=Oat PE=1 SV=1"	1.14336e+07	1.22099e+07	1.18677e+07	1.19518e+07	1.11033e+07	9.23929e+06	9.56697e+06	9.70892e+06	1.0109e+07	9.27289e+06	-0.490731	0.00540751
P29788	Vtn	Vitronectin OS=Mus musculus GN=Vtn PE=1 SV=2	1.51147e+07	9.82624e+06	1.7347e+07	7.28836e+06	1.57692e+07	1.12388e+07	1.07516e+07	1.21223e+07	1.12116e+07	1.25887e+07	-0.63753	0.758409
P30115	Gsta3	Glutathione S-transferase A3 OS=Mus musculus GN=Gsta3 PE=1 SV=2	1.19862e+07	1.18267e+07	9.96797e+06	1.09933e+07	1.11173e+07	1.08135e+07	9.21361e+06	9.47752e+06	9.45786e+06	1.02838e+07	-0.389714	0.0829109
P30275	Ckmt1	"Creatine kinase U-type, mitochondrial OS=Mus musculus GN=Ckmt1 PE=1 SV=1"	74637.8	73460.8	74455.5	79113.9	66635.1	65604.9	68634.5	77525.2	73244.6	71300	-0.101009	0.59916
P30282	Ccnd3	G1/S-specific cyclin-D3 OS=Mus musculus GN=Ccnd3 PE=1 SV=1	282400	304691	341703	295384	393003	323448	304558	333716	333396	307786	0.141388	0.982632
P30285	Cdk4	Cyclin-dependent kinase 4 OS=Mus musculus GN=Cdk4 PE=1 SV=1	1.20052e+06	1.27023e+06	1.71671e+06	1.07779e+06	1.78732e+06	903650	818697	1.14513e+06	1.0444e+06	990613	-0.594801	0.0482462
P30355	Alox5ap	Arachidonate 5-lipoxygenase-activating protein OS=Mus musculus GN=Alox5ap PE=1 SV=2	785342	771476	828975	883275	752314	834446	769469	704372	679646	797202	-0.0498212	0.385536
P30412	Ppic	Peptidyl-prolyl cis-trans isomerase C OS=Mus musculus GN=Ppic PE=1 SV=1	2.60105e+06	2.56044e+06	2.74941e+06	2.80922e+06	2.82386e+06	2.72311e+06	2.9253e+06	2.98561e+06	2.76464e+06	2.72859e+06	-0.000164322	0.399369
P30416	Fkbp4	Peptidyl-prolyl cis-trans isomerase FKBP4 OS=Mus musculus GN=Fkbp4 PE=1 SV=5	6.65636e+06	7.54673e+06	6.88298e+06	8.23428e+06	7.37848e+06	6.73973e+06	6.58805e+06	6.52922e+06	7.12169e+06	6.72328e+06	-0.223758	0.193798
P30681	Hmgb2	High mobility group protein B2 OS=Mus musculus GN=Hmgb2 PE=1 SV=3	4.03298e+06	5.16466e+06	3.64811e+06	6.28555e+06	3.34434e+06	7.40365e+06	7.12484e+06	4.29384e+06	4.77943e+06	5.16218e+06	0.581838	0.236587
P30933	Svs5	Seminal vesicle secretory protein 5 OS=Mus musculus GN=Svs5 PE=2 SV=1	2.53597e+07	1247235820	2.69245e+07	6014543341	2.04238e+07	2.31574e+07	2.38244e+07	2.3263e+07	2.39022e+07	4.21469e+07	0.0532353	0.24632
P30999-2	Ctnnd1	Isoform 2 of Catenin delta-1 OS=Mus musculus GN=Ctnnd1	8.20646e+06	6.80469e+06	8.30693e+06	5.67406e+06	7.93247e+06	7.58345e+06	7.96777e+06	7.55746e+06	8.02347e+06	7.32053e+06	-0.105415	0.633934
P31001	Des	Desmin OS=Mus musculus GN=Des PE=1 SV=3	1.06554e+07	3.62251e+06	8.7017e+06	2.66013e+06	4.65696e+06	5.07026e+06	5.943e+06	4.90551e+06	6.35143e+06	4.71868e+06	0.174444	0.977248
P31230	Aimp1	Aminoacyl tRNA synthase complex-interacting multifunctional protein 1 OS=Mus musculus GN=Aimp1 PE=1 SV=2	3.73318e+06	3.71582e+06	4.55655e+06	3.7045e+06	3.90054e+06	3.70504e+06	3.71757e+06	3.77877e+06	3.96597e+06	3.6697e+06	-0.0183775	0.565118
P31266-2	Rbpj	Isoform 2 of Recombining binding protein suppressor of hairless OS=Mus musculus GN=Rbpj	453071	614285	480914	1.08969e+06	491976	427374	493224	468171	507168	418856	-0.148783	0.260976
P31324	Prkar2b	cAMP-dependent protein kinase type II-beta regulatory subunit OS=Mus musculus GN=Prkar2b PE=1 SV=3	2.26545e+07	2.2102e+07	1.98914e+07	2.16129e+07	23433532	3.055e+07	3.05806e+07	2.80926e+07	2.85212e+07	3.15964e+07	0.751722	0.00295584
P31428	Dpep1	Dipeptidase 1 OS=Mus musculus GN=Dpep1 PE=1 SV=2	2.54092e+07	1.81303e+07	2.56112e+07	1.97415e+07	1.32981e+07	1.39914e+07	1.46376e+07	1.69767e+07	1.38119e+07	1.58865e+07	-0.768607	0.114699
P31532	Saa4	Serum amyloid A-4 protein OS=Mus musculus GN=Saa4 PE=1 SV=2	1.73389e+06	1.84293e+06	1.46041e+06	1.58043e+06	1.85254e+06	2.57008e+06	2.21469e+06	2.48012e+06	2.41691e+06	2.96461e+06	0.789192	0.00540751
P31649	Slc6a13	Sodium- and chloride-dependent GABA transporter 2 OS=Mus musculus GN=Slc6a13 PE=1 SV=1	561031	525751	484413	512957	536759	686634	645460	605865	603069	637087	0.445906	0.0120113
P31725	S100a9	Protein S100-A9 OS=Mus musculus GN=S100a9 PE=1 SV=3	259084	340005	318964	376690	403630	656112	330032	338323	346456	370166	0.0450508	0.425427
P31750	Akt1	RAC-alpha serine/threonine-protein kinase OS=Mus musculus GN=Akt1 PE=1 SV=2	2.64771e+06	2.48948e+06	2.48316e+06	2.4183e+06	2.17528e+06	2.74836e+06	2.5166e+06	2.46372e+06	2.46675e+06	2.40779e+06	-0.0267398	0.607319
P31786	Dbi	Acyl-CoA-binding protein OS=Mus musculus GN=Dbi PE=1 SV=2	9.55165e+07	1.03404e+08	7.8325e+07	8.99067e+07	8.58813e+07	1.71018e+08	1.57157e+08	1.33405e+08	1.3094e+08	1.54001e+08	1.34117	0.00335613
P31809	Ceacam1	Isoform 3 of Carcinoembryonic antigen-related cell adhesion molecule 1 OS=Mus musculus GN=Ceacam1	114538	122512	113733	128926	115535	115229	123620	120633	116464	117343	0.0211339	0.96876
P31938	Map2k1	Dual specificity mitogen-activated protein kinase kinase 1 OS=Mus musculus GN=Map2k1 PE=1 SV=2	3.84525e+06	4.31259e+06	3.71181e+06	4.3585e+06	3.64554e+06	6.95329e+06	6.8442e+06	4.68909e+06	4.74601e+06	5.29096e+06	0.742345	0.0246709
P31996	Cd68	Isoform Short of Macrosialin OS=Mus musculus GN=Cd68	563861	523269	564233	638390	411599	533525	521058	462023	571570	488826	-0.175766	0.735261
P32020-2	Scp2	Isoform SCP2 of Non-specific lipid-transfer protein OS=Mus musculus GN=Scp2	272285	300728	436825	331745	457124	180825	163884	286908	246095	236769	-0.85328	0.0349317
P32020	Scp2	Non-specific lipid-transfer protein OS=Mus musculus GN=Scp2 PE=1 SV=3	2.93479e+06	3.60458e+06	3.41935e+06	3.80728e+06	2.9564e+06	2.39214e+06	2.64107e+06	2.5935e+06	2.61382e+06	2.60987e+06	-0.611644	0.014588
P32037	Slc2a3	"Solute carrier family 2, facilitated glucose transporter member 3 OS=Mus musculus GN=Slc2a3 PE=1 SV=1"	206227	314689	129542	809147	119794	233925	228130	167607	183338	203034	-0.0962685	0.709333
P32067	Ssb	Lupus La protein homolog OS=Mus musculus GN=Ssb PE=1 SV=1	1.16106e+07	9.68949e+06	1.05302e+07	7.59862e+06	9.37938e+06	1.09036e+07	1.04274e+07	9.62792e+06	9.68804e+06	9.69858e+06	0.00187408	0.714056
P32233	Drg1	Developmentally-regulated GTP-binding protein 1 OS=Mus musculus GN=Drg1 PE=1 SV=1	2.21754e+06	2.46119e+06	2.38261e+06	2.48943e+06	2.41859e+06	2.63956e+06	2.8814e+06	2.49486e+06	2.4965e+06	2.67596e+06	0.186378	0.101439
P32261	Serpinc1	Antithrombin-III OS=Mus musculus GN=Serpinc1 PE=1 SV=1	3.44693e+07	3.48903e+07	3.23925e+07	3.87819e+07	3.04471e+07	3.74493e+07	3.83135e+07	3.28697e+07	3.14782e+07	3.62206e+07	0.110166	0.707192
P32443	Meox2	Homeobox protein MOX-2 OS=Mus musculus GN=Meox2 PE=2 SV=1	360642	366217	445950	408989	469669	394571	317156	359119	396206	375464	-0.238857	0.258801
P32507-2	Pvrl2	Isoform Alpha of Nectin-2 OS=Mus musculus GN=Pvrl2	954974	912907	818841	1.0654e+06	935418	942259	958707	883425	866895	958883	0.00687644	0.857369
P32848	Pvalb	Parvalbumin alpha OS=Mus musculus GN=Pvalb PE=1 SV=3	2.18757e+06	8.65814e+06	2.23423e+06	4.16688e+06	4.1174e+06	2.76848e+06	1.26251e+06	2.53601e+06	1.5605e+06	2.39869e+06	-1.30712	0.124721
P32883-2	Kras	Isoform 2B of GTPase KRas OS=Mus musculus GN=Kras	585418	611317	655535	752555	690087	500171	505293	498331	533985	521032	-0.603819	0.010201
P32921-2	Wars	"Isoform 2 of Tryptophan--tRNA ligase, cytoplasmic OS=Mus musculus GN=Wars"	1.03663e+07	1.09139e+07	1.01151e+07	1.1138e+07	9.71734e+06	1.07567e+07	1.09794e+07	1.01715e+07	9.88049e+06	1.05686e+07	0.0405372	0.969149
P33267	Cyp2f2	Cytochrome P450 2F2 OS=Mus musculus GN=Cyp2f2 PE=2 SV=1	4.90852e+06	4.80984e+06	4.92758e+06	7.4406e+06	4.01443e+06	2.48676e+06	2.24815e+06	2.363e+06	2.63173e+06	2.27085e+06	-1.7867	0.00295584
P33587	Proc	Vitamin K-dependent protein C OS=Mus musculus GN=Proc PE=1 SV=2	353743	403932	326722	510077	298356	357064	328685	336406	292385	333190	-0.148061	0.355375
P33622	Apoc3	Apolipoprotein C-III OS=Mus musculus GN=Apoc3 PE=1 SV=2	1.84106e+06	2.25275e+06	2.05243e+06	2.23143e+06	2.2735e+06	2.46015e+06	2.52781e+06	2.72142e+06	2.60537e+06	2.65805e+06	0.314406	0.0182791
P34022	Ranbp1	Ran-specific GTPase-activating protein OS=Mus musculus GN=Ranbp1 PE=1 SV=2	3.97186e+06	4.15603e+06	3.82537e+06	4.27118e+06	3.43255e+06	4.81069e+06	4.82345e+06	4.18993e+06	4.15515e+06	4.56178e+06	0.309942	0.0832543
P34152	Ptk2	Isoform 2 of Focal adhesion kinase 1 OS=Mus musculus GN=Ptk2	535743	614657	589082	542604	650396	531313	554522	528212	497591	626591	-0.238938	0.374471
P34884	Mif	Macrophage migration inhibitory factor OS=Mus musculus GN=Mif PE=1 SV=2	6.14946e+06	5.92016e+06	5.8982e+06	6.45625e+06	5.8417e+06	5.02601e+06	5.98557e+06	4.43072e+06	4.75448e+06	4.85486e+06	-0.468295	0.0349317
P34914	Ephx2	Bifunctional epoxide hydrolase 2 OS=Mus musculus GN=Ephx2 PE=1 SV=2	2.38813e+07	2.53399e+07	2.30285e+07	2.42095e+07	2.32482e+07	2.45715e+07	2.24941e+07	2.52277e+07	2.48031e+07	2.64921e+07	0.0704546	0.566717
P34928	Apoc1	Apolipoprotein C-I OS=Mus musculus GN=Apoc1 PE=1 SV=1	1.93246e+06	3.01814e+06	2.17552e+06	3.30871e+06	2.51586e+06	3.72356e+06	4.22389e+06	3.65082e+06	3.61786e+06	4.65658e+06	0.903797	0.0184616
P35123	Usp4	Ubiquitin carboxyl-terminal hydrolase 4 OS=Mus musculus GN=Usp4 PE=1 SV=3	3.96699e+06	3.91333e+06	3.90066e+06	3.52323e+06	3.82094e+06	3.88633e+06	3.97691e+06	3.90015e+06	3.89951e+06	3.89266e+06	-0.00729279	0.610172
P35235-2	Ptpn11	Isoform 2 of Tyrosine-protein phosphatase non-receptor type 11 OS=Mus musculus GN=Ptpn11	1.32523e+07	1.15418e+07	1.2727e+07	1.26132e+07	1.28987e+07	1.31125e+07	1.44141e+07	1.27111e+07	1.21737e+07	1.36976e+07	0.0247427	0.429688
P35276	Rab3d	Ras-related protein Rab-3D OS=Mus musculus GN=Rab3d PE=1 SV=1	8.32741e+06	8.1066e+06	7.73586e+06	8.69604e+06	8.33113e+06	9.78023e+06	1.01829e+07	1.01189e+07	9.29808e+06	9.43526e+06	0.361265	0.0115269
P35278	Rab5c	Ras-related protein Rab-5C OS=Mus musculus GN=Rab5c PE=1 SV=2	4.31291e+06	4.47694e+06	5.07099e+06	4.80383e+06	4.62926e+06	4.00387e+06	4.14252e+06	4.34374e+06	4.13681e+06	4.17287e+06	-0.266582	0.058872
P35279	Rab6a	Ras-related protein Rab-6A OS=Mus musculus GN=Rab6a PE=1 SV=4	818380	837988	937637	905320	794682	900578	956109	884027	899896	961794	0.170878	0.226225
P35282	Rab21	Ras-related protein Rab-21 OS=Mus musculus GN=Rab21 PE=1 SV=4	9.22178e+06	9.83683e+06	9.55123e+06	1.03402e+07	1.01886e+07	9.25088e+06	1.01925e+07	9.95913e+06	9.79803e+06	1.05928e+07	0.0174239	0.817941
P35283	Rab12	Ras-related protein Rab-12 OS=Mus musculus GN=Rab12 PE=1 SV=3	1.29792e+06	1.51057e+06	1.43889e+06	1.59785e+06	1.49414e+06	1.30715e+06	1.40476e+06	1.3641e+06	1.46821e+06	1.40858e+06	-0.149004	0.397859
P35285	Rab22a	Ras-related protein Rab-22A OS=Mus musculus GN=Rab22a PE=1 SV=2	1.8128e+06	1.89202e+06	1.83549e+06	2.02688e+06	1.82922e+06	2.09222e+06	2.13222e+06	1.90043e+06	1.92871e+06	2.02439e+06	0.215647	0.191736
P35290	Rab24	Ras-related protein Rab-24 OS=Mus musculus GN=Rab24 PE=1 SV=2	232381	242890	192910	294188	213463	240008	241076	237773	235459	238810	0.0584647	0.815225
P35293	Rab18	Ras-related protein Rab-18 OS=Mus musculus GN=Rab18 PE=2 SV=2	7.17533e+06	7.38265e+06	7.74745e+06	7.67019e+06	7.96384e+06	7.80418e+06	7.44982e+06	8.12342e+06	7.51379e+06	8.11582e+06	0.0179274	0.571093
P35330	Icam2	Intercellular adhesion molecule 2 OS=Mus musculus GN=Icam2 PE=1 SV=1	2.47199e+06	2.38129e+06	2.19863e+06	2.99098e+06	2.27896e+06	2.33804e+06	2.49093e+06	2.13489e+06	2.43197e+06	2.4407e+06	0.0386867	0.686525
P35385	Hspb7	Heat shock protein beta-7 OS=Mus musculus GN=Hspb7 PE=1 SV=3	211224	186547	213622	219367	198587	237450	240555	232213	247136	200361	0.266623	0.114055
P35441	Thbs1	Thrombospondin-1 OS=Mus musculus GN=Thbs1 PE=1 SV=1	2.23985e+06	2.2903e+06	2.71173e+06	2.10998e+06	3.0643e+06	3.23069e+06	2.89869e+06	2.85267e+06	2.63075e+06	3.83291e+06	0.573783	0.104042
P35486	Pdha1	"Pyruvate dehydrogenase E1 component subunit alpha, somatic form, mitochondrial OS=Mus musculus GN=Pdha1 PE=1 SV=1"	2.70176e+07	3.65133e+07	3.08482e+07	2.85436e+07	3.76345e+07	2.60213e+07	2.72251e+07	2.81411e+07	2.54672e+07	2.7047e+07	-0.309473	0.0880659
P35487	Pdha2	"Pyruvate dehydrogenase E1 component subunit alpha, testis-specific form, mitochondrial OS=Mus musculus GN=Pdha2 PE=2 SV=1"	154481	169191	133209	263864	135470	141932	140579	146255	134024	138314	-0.238339	0.316632
P35505	Fah	Fumarylacetoacetase OS=Mus musculus GN=Fah PE=1 SV=2	1.96953e+07	2.28571e+07	2.02569e+07	2.2668e+07	2.27901e+07	2.20321e+07	2.21593e+07	2.38111e+07	2.44888e+07	2.42251e+07	0.0779523	0.223163
P35550	Fbl	rRNA 2'-O-methyltransferase fibrillarin OS=Mus musculus GN=Fbl PE=2 SV=2	1.37032e+06	611006	930950	475143	757720	972358	979637	854858	1.15079e+06	813347	0.556964	0.423609
P35564	Canx	Calnexin OS=Mus musculus GN=Canx PE=1 SV=1	3.81448e+07	3.8606e+07	3.33045e+07	4.12003e+07	3.4314e+07	4.75978e+07	4.53251e+07	3.9697e+07	3.92935e+07	4.32983e+07	0.281376	0.0807293
P35569	Irs1	Insulin receptor substrate 1 OS=Mus musculus GN=Irs1 PE=1 SV=1	87186.7	90895.6	105978	106822	99614.6	68596.5	55295.6	82162.6	75256.4	74022.4	-0.688722	0.0174977
P35585	Ap1m1	AP-1 complex subunit mu-1 OS=Mus musculus GN=Ap1m1 PE=1 SV=3	4.43397e+06	3.99445e+06	3.89124e+06	4.46934e+06	4.2419e+06	4.15278e+06	4.58097e+06	4.49449e+06	4.42847e+06	4.37412e+06	0.0711597	0.383921
P35700	Prdx1	Peroxiredoxin-1 OS=Mus musculus GN=Prdx1 PE=1 SV=1	4.30375e+07	4.65296e+07	4.07457e+07	4.5344e+07	4.14053e+07	4.62828e+07	5.02546e+07	4.53343e+07	4.58812e+07	4.78328e+07	0.162341	0.139479
P35762	Cd81	CD81 antigen OS=Mus musculus GN=Cd81 PE=1 SV=2	5.20018e+06	9.63531e+06	1.02494e+07	5.40021e+06	5.84868e+06	1.12501e+07	7.98232e+06	6.04303e+06	6.10428e+06	1.28929e+07	0.872389	0.490377
P35802	Gpm6a	Neuronal membrane glycoprotein M6-a OS=Mus musculus GN=Gpm6a PE=1 SV=1	1.7936e+06	2.26594e+06	1.87145e+06	2.24065e+06	1.97511e+06	2.63679e+06	2.57749e+06	2.49119e+06	2.66202e+06	2.86526e+06	0.639904	0.0111281
P35821	Ptpn1	Tyrosine-protein phosphatase non-receptor type 1 OS=Mus musculus GN=Ptpn1 PE=1 SV=2	3.43895e+06	3.55164e+06	3.51973e+06	3.62034e+06	3.56864e+06	3.19399e+06	3.36533e+06	3.38719e+06	3.48733e+06	3.23553e+06	-0.122709	0.162938
P35831	Ptpn12	Tyrosine-protein phosphatase non-receptor type 12 OS=Mus musculus GN=Ptpn12 PE=1 SV=3	4.41127e+06	4.05933e+06	3.87571e+06	4.19037e+06	3.76132e+06	4.44268e+06	4.37092e+06	3.96502e+06	3.90279e+06	4.02871e+06	-0.0177126	0.753754
P35846	Folr1	Folate receptor alpha OS=Mus musculus GN=Folr1 PE=1 SV=2	886493	534182	803743	691305	347345	427582	641431	337047	660596	357003	-1.21674	0.320002
P35918	Kdr	Vascular endothelial growth factor receptor 2 OS=Mus musculus GN=Kdr PE=1 SV=1	95226.5	97175	94580.7	95439.8	86264.8	100127	104363	105260	96425.5	99715	0.114491	0.131884
P35922	Fmr1	Isoform ISO2 of Fragile X mental retardation protein 1 homolog OS=Mus musculus GN=Fmr1	4.42638e+06	1.57151e+06	4.27348e+06	1.19707e+06	4.23985e+06	5.29166e+06	5.70712e+06	4.757e+06	4.89334e+06	4.49019e+06	0.273589	0.12053
P35951	Ldlr	Low-density lipoprotein receptor OS=Mus musculus GN=Ldlr PE=1 SV=2	76644.4	65391.1	98905.6	59199.4	84919.4	71963.2	73457.2	75369.8	97853.8	67935.5	-0.107277	0.945949
P35979	Rpl12	60S ribosomal protein L12 OS=Mus musculus GN=Rpl12 PE=1 SV=2	9.52924e+06	4.9589e+06	8.96168e+06	4.68346e+06	8.28816e+06	1.15655e+07	1.30464e+07	9.45542e+06	10125443	1.01868e+07	0.44872	0.0639688
P35980	Rpl18	60S ribosomal protein L18 OS=Mus musculus GN=Rpl18 PE=2 SV=3	8.94344e+06	2.98702e+06	1.02016e+07	2.02848e+06	7.56112e+06	8.79316e+06	9.80475e+06	8.81178e+06	8.78591e+06	8.2325e+06	0.300708	0.226379
P35991	Btk	Tyrosine-protein kinase BTK OS=Mus musculus GN=Btk PE=1 SV=4	363564	350290	340300	355121	397464	341200	335387	362086	340927	338013	-0.134606	0.340267
P36371	Tap2	Antigen peptide transporter 2 OS=Mus musculus GN=Tap2 PE=2 SV=1	5.11803e+06	5.68585e+06	5.48501e+06	6.48115e+06	5.30491e+06	5.12122e+06	4.90598e+06	4.98377e+06	5.26984e+06	5.4348e+06	-0.15873	0.213098
P36423	Tbxas1	Thromboxane-A synthase OS=Mus musculus GN=Tbxas1 PE=2 SV=2	154153	175429	163653	225503	174745	191185	169756	149598	167579	188521	-0.0794891	0.826136
P36536	Sar1a	GTP-binding protein SAR1a OS=Mus musculus GN=Sar1a PE=2 SV=1	2.8728e+06	2.82102e+06	2.58955e+06	3.37621e+06	2.52325e+06	3.85543e+06	3.75295e+06	3.18761e+06	3.15269e+06	3.07205e+06	0.276239	0.0819248
P36552	Cpox	"Oxygen-dependent coproporphyrinogen-III oxidase, mitochondrial OS=Mus musculus GN=Cpox PE=1 SV=2"	675176	586803	634517	705757	648381	507631	510735	477480	544589	538959	-0.564122	0.00887768
P36916	Gnl1	Guanine nucleotide-binding protein-like 1 OS=Mus musculus GN=Gnl1 PE=2 SV=4	2.4319e+06	2.06762e+06	2.05731e+06	1.82522e+06	2.10032e+06	2.06562e+06	2.13153e+06	2.14308e+06	2.3136e+06	1.96542e+06	0.0704914	0.851594
P36993	Ppm1b	Isoform Beta-2 of Protein phosphatase 1B OS=Mus musculus GN=Ppm1b	1.72056e+06	1.8455e+06	1.72752e+06	1.92522e+06	1.75482e+06	1.80934e+06	1.93221e+06	1.92855e+06	1.83166e+06	1.84541e+06	0.099044	0.390852
P37040	Por	NADPH--cytochrome P450 reductase OS=Mus musculus GN=Por PE=1 SV=2	1.20881e+08	6.39392e+07	5.53549e+07	6.55198e+07	8.53789e+07	9.24354e+07	1.10178e+08	6.8889e+07	6.27125e+07	1.06746e+08	0.506572	0.571473
P37172	Acvr1	Activin receptor type-1 OS=Mus musculus GN=Acvr1 PE=2 SV=2	118069	136962	107013	114566	115859	113265	120911	108474	116163	113868	-0.0556734	0.65087
P37238	Pparg	Isoform 1 of Peroxisome proliferator-activated receptor gamma OS=Mus musculus GN=Pparg	673057	543588	579789	406385	592220	599079	637581	637426	582801	606443	0.100477	0.37084
P37804	Tagln	Transgelin OS=Mus musculus GN=Tagln PE=1 SV=3	5.18963e+07	3.43682e+07	4.43718e+07	4.35968e+07	3.09417e+07	3.71906e+07	3.70859e+07	5.18297e+07	2.83251e+07	5.09637e+07	-0.401102	0.977515
P37889	Fbln2	Fibulin-2 OS=Mus musculus GN=Fbln2 PE=1 SV=2	1.62479e+06	1.35381e+06	1.58664e+06	1.05705e+06	1.72493e+06	1.81223e+06	1.72256e+06	1.70321e+06	1.78819e+06	1.68012e+06	0.187951	0.143539
P38060	Hmgcl	"Hydroxymethylglutaryl-CoA lyase, mitochondrial OS=Mus musculus GN=Hmgcl PE=1 SV=2"	5.45551e+06	5.4705e+06	5.92105e+06	5.22703e+06	5.43696e+06	4.1033e+06	3.97773e+06	4.37917e+06	4.3416e+06	4.14575e+06	-0.63632	0.00295584
P38585	Ttl	Tubulin--tyrosine ligase OS=Mus musculus GN=Ttl PE=2 SV=2	521054	504297	457635	541855	494298	658675	577633	588596	526808	607583	0.34031	0.0445088
P38647	Hspa9	"Stress-70 protein, mitochondrial OS=Mus musculus GN=Hspa9 PE=1 SV=3"	2.95663e+07	3.32377e+07	2.77317e+07	2.89878e+07	2.97164e+07	2.99437e+07	2.95325e+07	2.86864e+07	2.81522e+07	2.78548e+07	-0.0812923	0.55075
P39039	Mbl1	Mannose-binding protein A OS=Mus musculus GN=Mbl1 PE=2 SV=1	779917	810457	793207	715807	759630	661294	720407	782849	593411	753839	-0.179309	0.21468
P39053-4	Dnm1	Isoform 2 of Dynamin-1 OS=Mus musculus GN=Dnm1	847485	855606	973287	984331	896491	785509	759430	834116	768817	799791	-0.314132	0.0362571
P39054-2	Dnm2	Isoform 2 of Dynamin-2 OS=Mus musculus GN=Dnm2	1.01552e+07	7.9934e+06	9.27443e+06	8.27128e+06	8.53502e+06	9.91282e+06	9.99226e+06	8.2706e+06	8.0098e+06	9.39636e+06	0.184207	0.753032
P39061	Col18a1	Collagen alpha-1(XVIII) chain OS=Mus musculus GN=Col18a1 PE=1 SV=4	3.5378e+06	2.64681e+06	2.79892e+06	2.51662e+06	2.87022e+06	2.69958e+06	2.78474e+06	2.7256e+06	3.57343e+06	2.87998e+06	-0.0199212	0.854484
P39098-2	Man1a2	"Isoform 2 of Mannosyl-oligosaccharide 1,2-alpha-mannosidase IB OS=Mus musculus GN=Man1a2"	133780	178054	174237	169198	195948	167688	124728	160191	142494	156088	-0.243597	0.275837
P39429	Traf2	Isoform 2 of TNF receptor-associated factor 2 OS=Mus musculus GN=Traf2	146574	129810	147026	91783.3	128341	132763	141940	134023	136793	132416	0.0622461	0.584679
P39447	Tjp1	Tight junction protein ZO-1 OS=Mus musculus GN=Tjp1 PE=1 SV=2	4.74386e+06	3.5798e+06	4.52141e+06	2.84421e+06	4.20087e+06	4.24493e+06	4.51468e+06	4.05059e+06	4.86685e+06	4.37614e+06	0.0825908	0.371727
P39654	Alox15	Arachidonate 15-lipoxygenase OS=Mus musculus GN=Alox15 PE=1 SV=4	704983	864248	828821	950141	953854	812978	808778	788244	689789	899392	-0.152167	0.466942
P39655	Alox12	"Arachidonate 12-lipoxygenase, 12S-type OS=Mus musculus GN=Alox12 PE=1 SV=4"	417371	343509	375113	340675	325665	338187	398300	312588	390343	315705	-0.0401006	0.783135
P39688	Fyn	Isoform 2 of Tyrosine-protein kinase Fyn OS=Mus musculus GN=Fyn	306219	294765	264565	296566	268158	294428	312183	269089	288364	284447	-0.0589847	0.840339
P39749	Fen1	Flap endonuclease 1 OS=Mus musculus GN=Fen1 PE=1 SV=1	977934	820092	874758	1.01455e+06	649898	1.00576e+06	1.04003e+06	677383	854732	853045	-0.0628562	0.894198
P39876	Timp3	Metalloproteinase inhibitor 3 OS=Mus musculus GN=Timp3 PE=2 SV=1	190576	165759	196142	161714	214717	188972	214882	200407	193620	210511	0.0972031	0.300332
P40124	Cap1	Adenylyl cyclase-associated protein 1 OS=Mus musculus GN=Cap1 PE=1 SV=4	2.66883e+07	2.5301e+07	2.29385e+07	2.84566e+07	2.13769e+07	3.22791e+07	3.22431e+07	2.61618e+07	2.76574e+07	2.77858e+07	0.218479	0.10622
P40142	Tkt	Transketolase OS=Mus musculus GN=Tkt PE=1 SV=1	9.12277e+07	1.3775e+08	9.75171e+07	9.12055e+07	1.35567e+08	9.52777e+07	1.09025e+08	8.34167e+07	7.91951e+07	9.31611e+07	-0.12149	0.241511
P40237	Cd82	CD82 antigen OS=Mus musculus GN=Cd82 PE=1 SV=1	3.13627e+06	3.01069e+06	2.67213e+06	3.02843e+06	3.01112e+06	2.90548e+06	2.98092e+06	2.47627e+06	2.7565e+06	2.91858e+06	-0.0868674	0.383921
P40240	Cd9	CD9 antigen OS=Mus musculus GN=Cd9 PE=1 SV=2	889663	679338	741239	708845	651093	767932	867400	672324	744836	736452	0.0841941	0.728094
P40336	Vps26a	Isoform 2 of Vacuolar protein sorting-associated protein 26A OS=Mus musculus GN=Vps26a	9.68714e+06	1.00535e+07	9.28581e+06	9.13009e+06	9.43777e+06	1.24651e+07	1.21094e+07	1.09654e+07	1.09211e+07	1.12469e+07	0.383006	0.0104998
P40338	Vhl	Von Hippel-Lindau disease tumor suppressor OS=Mus musculus GN=Vhl PE=1 SV=1	190934	154331	152796	194064	154771	173265	147175	181158	170787	177636	0.248434	0.94871
P40630	Tfam	"Isoform Nuclear of Transcription factor A, mitochondrial OS=Mus musculus GN=Tfam"	897410	526514	640412	429374	601369	714472	588042	721129	692968	637859	0.288095	0.527099
P40936	Inmt	Indolethylamine N-methyltransferase OS=Mus musculus GN=Inmt PE=1 SV=1	1.66694e+07	1.13831e+07	1.34638e+07	1.56739e+07	8.11161e+06	8.58376e+06	8.17465e+06	1.29103e+07	8.82412e+06	9.10962e+06	-0.956396	0.151943
P41105	Rpl28	60S ribosomal protein L28 OS=Mus musculus GN=Rpl28 PE=1 SV=2	709834	169120	493861	111845	411016	806392	760371	595409	586120	564684	0.818575	0.115901
P41160	Lep	Leptin OS=Mus musculus GN=Lep PE=2 SV=1	2.02474e+06	1.39751e+06	1.52704e+06	1.82245e+06	1.41801e+06	3.33909e+06	3.75691e+06	2.36913e+06	2.71073e+06	1.86549e+06	1.33015	0.0251304
P41216	Acsl1	Long-chain-fatty-acid--CoA ligase 1 OS=Mus musculus GN=Acsl1 PE=1 SV=2	1.41547e+08	2.07342e+08	1.30466e+08	1.45236e+08	1.78777e+08	1.93526e+08	1.74378e+08	1.81215e+08	1.56332e+08	2.08166e+08	0.460372	0.292709
P41230	Kdm5c	Isoform 2 of Lysine-specific demethylase 5C OS=Mus musculus GN=Kdm5c	224579	231078	254331	216243	239452	207332	206642	221012	220554	186535	-0.248186	0.0980613
P41233	Abca1	ATP-binding cassette sub-family A member 1 OS=Mus musculus GN=Abca1 PE=1 SV=4	4.54152e+06	4.74284e+06	4.2371e+06	4.72544e+06	4.64147e+06	4.75654e+06	4.56569e+06	4.77797e+06	4.45671e+06	4.82332e+06	0.0401203	0.6611
P41234	Abca2	ATP-binding cassette sub-family A member 2 OS=Mus musculus GN=Abca2 PE=1 SV=4	143830	131339	140061	124940	132449	142014	120209	137599	130152	127491	-0.0613736	0.713694
P41241	Csk	Tyrosine-protein kinase CSK OS=Mus musculus GN=Csk PE=1 SV=2	2.07164e+06	1.95211e+06	2.08242e+06	2.09803e+06	2.04121e+06	2.05184e+06	2.13133e+06	2.05148e+06	1.93938e+06	2.04626e+06	-0.0297922	0.960508
P41317	Mbl2	Mannose-binding protein C OS=Mus musculus GN=Mbl2 PE=2 SV=2	971606	962457	995176	1.26254e+06	892427	1.00542e+06	1.07081e+06	981500	861775	931497	0.00828149	0.668984
P41731	Cd63	CD63 antigen OS=Mus musculus GN=Cd63 PE=1 SV=2	355265	416827	372533	379387	326031	375523	473283	328272	428514	400026	0.158456	0.451954
P41778-2	Pbx1	Isoform PBX1b of Pre-B-cell leukemia transcription factor 1 OS=Mus musculus GN=Pbx1	24751.9	22707.5	30527.6	27549	21172.9	21123.7	21099	22648.6	23642	21693.1	-0.335645	0.181684
P42125	Eci1	"Enoyl-CoA delta isomerase 1, mitochondrial OS=Mus musculus GN=Eci1 PE=1 SV=2"	1.8133e+07	2.14436e+07	1.84041e+07	1.91625e+07	2.01909e+07	1.68601e+07	1.66483e+07	1.8462e+07	1.79534e+07	1.84387e+07	-0.193354	0.128122
P42128	Foxk1	Forkhead box protein K1 OS=Mus musculus GN=Foxk1 PE=1 SV=2	239999	272144	292705	284242	244389	227103	222369	222483	265708	241377	-0.421868	0.124721
P42208	Sep-02	Septin-2 OS=Mus musculus GN=Sept2 PE=1 SV=2	1.85303e+07	1.5204e+07	1.71103e+07	1.53808e+07	1.48907e+07	1.97098e+07	1.82946e+07	1.64892e+07	1.67176e+07	1.92796e+07	0.382815	0.177818
P42225	Stat1	Signal transducer and activator of transcription 1 OS=Mus musculus GN=Stat1 PE=1 SV=1	8.6818e+06	9.93898e+06	8.64424e+06	9.98568e+06	9.29065e+06	9.5225e+06	9.64814e+06	8.90358e+06	9.43921e+06	9.25702e+06	0.011756	0.920099
P42227	Stat3	Isoform Stat3B of Signal transducer and activator of transcription 3 OS=Mus musculus GN=Stat3	4.41393e+06	4.56501e+06	4.44747e+06	4.43231e+06	4.45583e+06	4.77955e+06	4.86095e+06	4.76238e+06	4.63752e+06	4.59099e+06	0.12767	0.1471
P42230	Stat5a	Signal transducer and activator of transcription 5A OS=Mus musculus GN=Stat5a PE=1 SV=1	424838	489917	458340	461457	438619	507495	513268	499365	461146	529917	0.230623	0.0932423
P42232	Stat5b	Signal transducer and activator of transcription 5B OS=Mus musculus GN=Stat5b PE=1 SV=1	1.48814e+06	1.4119e+06	1.33695e+06	851970	957461	1.9268e+06	1.87478e+06	1.39234e+06	1.56368e+06	1.4387e+06	0.32811	0.085633
P42337	Pik3ca	"Phosphatidylinositol 4,5-bisphosphate 3-kinase catalytic subunit alpha isoform OS=Mus musculus GN=Pik3ca PE=1 SV=2"	859170	860649	761890	948987	910763	982178	868310	920529	1.01994e+06	936239	0.192609	0.217726
P42567	Eps15	Epidermal growth factor receptor substrate 15 OS=Mus musculus GN=Eps15 PE=1 SV=1	5.57656e+06	4.83953e+06	5.55564e+06	3.61126e+06	5.00023e+06	5.71565e+06	5.38668e+06	5.29349e+06	5.07501e+06	5.12397e+06	0.101084	0.423322
P42669	Pura	Transcriptional activator protein Pur-alpha OS=Mus musculus GN=Pura PE=1 SV=1	6.52426e+06	4.22609e+06	6.39177e+06	1.9673e+06	5.55041e+06	6.40159e+06	6.32281e+06	6.23247e+06	6.13312e+06	5.87026e+06	0.224439	0.288534
P42703-2	Lifr	Isoform 2 of Leukemia inhibitory factor receptor OS=Mus musculus GN=Lifr	4.70011e+06	4.69521e+06	3.91169e+06	5.62013e+06	3.82243e+06	3.79281e+06	3.60625e+06	4.02105e+06	3.40074e+06	4.12226e+06	-0.48517	0.120449
P42859	Htt	Huntingtin OS=Mus musculus GN=Htt PE=1 SV=2	4.40125e+06	4.48755e+06	4.59909e+06	4.12491e+06	4.62968e+06	4.43422e+06	4.42495e+06	4.43872e+06	4.32636e+06	4.34572e+06	-0.0355076	0.810251
P42867	Dpagt1	UDP-N-acetylglucosamine--dolichyl-phosphate N-acetylglucosaminephosphotransferase OS=Mus musculus GN=Dpagt1 PE=2 SV=2	105423	141219	143304	201406	113373	108787	51059.9	135627	117584	128401	-0.41783	0.29344
P42925	Pxmp2	Peroxisomal membrane protein 2 OS=Mus musculus GN=Pxmp2 PE=2 SV=2	554423	545036	513745	568898	583762	609482	642060	603627	536165	596550	0.173684	0.201067
P42932	Cct8	T-complex protein 1 subunit theta OS=Mus musculus GN=Cct8 PE=1 SV=3	3.11864e+07	2.91082e+07	2.77454e+07	3.14771e+07	2.76369e+07	3.08058e+07	3.00933e+07	2.74682e+07	3.01838e+07	3.07583e+07	0.07827	0.805303
P43024	Cox6a1	"Cytochrome c oxidase subunit 6A1, mitochondrial OS=Mus musculus GN=Cox6a1 PE=1 SV=2"	156578	309706	291168	138310	305264	238252	301753	275411	182987	214667	-0.41606	0.851594
P43025	Clec3b	Tetranectin OS=Mus musculus GN=Clec3b PE=1 SV=2	2.24455e+06	2.16241e+06	2.15023e+06	2.15783e+06	1.85477e+06	2.26964e+06	2.19606e+06	2.2919e+06	2.03224e+06	2.17569e+06	0.0377395	0.540982
P43135	Nr2f2	COUP transcription factor 2 OS=Mus musculus GN=Nr2f2 PE=1 SV=2	300376	287321	292136	294309	271751	274710	272205	254119	262160	242227	-0.251153	0.0665602
P43247	Msh2	DNA mismatch repair protein Msh2 OS=Mus musculus GN=Msh2 PE=1 SV=1	401653	373664	419536	476906	390768	359213	330509	367563	363440	358224	-0.256912	0.058872
P43274	Hist1h1e	Histone H1.4 OS=Mus musculus GN=Hist1h1e PE=1 SV=2	7.84625e+06	1.68292e+06	7.13596e+06	1.3391e+06	5.95991e+06	5.89323e+06	6.83216e+06	5.5801e+06	7.44125e+06	5.58714e+06	-0.0219934	0.312625
P43275	Hist1h1a	Histone H1.1 OS=Mus musculus GN=Hist1h1a PE=1 SV=2	760990	378779	769987	341958	628754	731010	836319	674945	836463	667892	0.329078	0.191833
P43276	Hist1h1b	Histone H1.5 OS=Mus musculus GN=Hist1h1b PE=1 SV=2	6.35855e+06	2.96078e+06	6.26944e+06	2.70311e+06	5.38355e+06	5.77633e+06	6.73027e+06	5.52994e+06	6.93266e+06	5.19049e+06	0.150541	0.241277
P43277	Hist1h1d	Histone H1.3 OS=Mus musculus GN=Hist1h1d PE=1 SV=2	2.27449e+06	302488	1.03141e+06	153325	735489	2.19322e+06	2.24058e+06	1.4128e+06	1.54132e+06	1.357e+06	1.88491	0.115013
P43406	Itgav	Integrin alpha-V OS=Mus musculus GN=Itgav PE=1 SV=2	3.89039e+06	3.96543e+06	3.70157e+06	4.11735e+06	4.12281e+06	4.30146e+06	4.52272e+06	4.17219e+06	4.02625e+06	4.24695e+06	0.159133	0.163253
P43883	Plin2	Perilipin-2 OS=Mus musculus GN=Plin2 PE=2 SV=2	361468	396964	419251	530543	546803	428299	426872	412052	476017	371026	0.0352145	0.667878
P45376	Akr1b1	Aldose reductase OS=Mus musculus GN=Akr1b1 PE=1 SV=3	2.59493e+07	3.24742e+07	2.55187e+07	3.3396e+07	2.66108e+07	3.71465e+07	3.41679e+07	3.28027e+07	3.06681e+07	3.40686e+07	0.540384	0.0944333
P45377	Akr1b8	Aldose reductase-related protein 2 OS=Mus musculus GN=Akr1b8 PE=1 SV=2	3.1928e+06	3.08616e+06	2.92999e+06	3.61912e+06	2.55493e+06	3.36388e+06	2.96558e+06	3.32688e+06	3.2241e+06	3.33579e+06	0.15701	0.504435
P45591	Cfl2	Cofilin-2 OS=Mus musculus GN=Cfl2 PE=1 SV=1	6.65311e+06	7.86126e+06	6.34024e+06	8.1644e+06	7.15302e+06	9.24387e+06	1.01526e+07	8.53484e+06	8.25489e+06	8.89885e+06	0.480816	0.0300596
P45700	Man1a1	"Mannosyl-oligosaccharide 1,2-alpha-mannosidase IA OS=Mus musculus GN=Man1a1 PE=1 SV=1"	1.4128e+06	1.49009e+06	1.55452e+06	1.61779e+06	1.50958e+06	1.38987e+06	1.45747e+06	1.47997e+06	1.4987e+06	1.38856e+06	-0.0913364	0.320214
P45878	Fkbp2	Peptidyl-prolyl cis-trans isomerase FKBP2 OS=Mus musculus GN=Fkbp2 PE=1 SV=1	2.48164e+06	2.76813e+06	2.82587e+06	2.73217e+06	2.8167e+06	2.61576e+06	2.86481e+06	2.77158e+06	2.66143e+06	2.75053e+06	-0.0160925	0.955092
P45952	Acadm	"Medium-chain specific acyl-CoA dehydrogenase, mitochondrial OS=Mus musculus GN=Acadm PE=1 SV=1"	2.86245e+07	3.36088e+07	2.84026e+07	2.92131e+07	2.98671e+07	3.03219e+07	3.34714e+07	3.1592e+07	3.1914e+07	3.14879e+07	0.154642	0.288326
P46061	Rangap1	Ran GTPase-activating protein 1 OS=Mus musculus GN=Rangap1 PE=1 SV=2	5.0816e+06	4.43705e+06	4.70739e+06	4.1041e+06	4.21495e+06	4.63633e+06	4.23175e+06	4.34807e+06	4.40358e+06	4.09459e+06	-0.0557019	0.600516
P46062	Sipa1	Signal-induced proliferation-associated protein 1 OS=Mus musculus GN=Sipa1 PE=1 SV=2	1.16087e+06	1.4188e+06	1.47206e+06	1.32415e+06	1.64872e+06	1.15992e+06	1.20811e+06	1.25881e+06	1.27313e+06	1.2385e+06	-0.310574	0.147679
P46412	Gpx3	Glutathione peroxidase 3 OS=Mus musculus GN=Gpx3 PE=2 SV=2	2.359e+06	2.12389e+06	2.21482e+06	1.44025e+06	2.26075e+06	2.57751e+06	2.50093e+06	3.03196e+06	2.443e+06	2.54781e+06	0.313525	0.0854658
P46414	Cdkn1b	Cyclin-dependent kinase inhibitor 1B OS=Mus musculus GN=Cdkn1b PE=1 SV=2	242967	221255	254113	222633	229593	162055	162510	180298	172516	219974	-0.662998	0.0168172
P46460	Nsf	Vesicle-fusing ATPase OS=Mus musculus GN=Nsf PE=1 SV=2	1.12897e+07	1.11539e+07	1.06954e+07	1.17643e+07	1.10166e+07	1.07559e+07	1.10529e+07	1.10832e+07	1.07899e+07	1.06794e+07	-0.0812611	0.500711
P46467	Vps4b	Vacuolar protein sorting-associated protein 4B OS=Mus musculus GN=Vps4b PE=1 SV=2	2.62026e+06	2.45877e+06	2.31713e+06	2.39142e+06	2.34849e+06	2.82496e+06	2.59004e+06	2.81372e+06	2.83403e+06	3.02832e+06	0.364352	0.0260733
P46471	Psmc2	26S protease regulatory subunit 7 OS=Mus musculus GN=Psmc2 PE=1 SV=5	1.33854e+07	1.31697e+07	1.35848e+07	1.35956e+07	1.39194e+07	1.32142e+07	1.31352e+07	1.3526e+07	1.28617e+07	1.29163e+07	-0.0738209	0.43445
P46638	Rab11b	Ras-related protein Rab-11B OS=Mus musculus GN=Rab11b PE=1 SV=3	1.16674e+07	1.20964e+07	1.16418e+07	1.30319e+07	1.13957e+07	1.35777e+07	1.39272e+07	1.26736e+07	1.22379e+07	1.2835e+07	0.212398	0.133833
P46656	Fdx1	"Adrenodoxin, mitochondrial OS=Mus musculus GN=Fdx1 PE=1 SV=1"	603640	780355	735249	777836	821074	587850	628565	713362	711441	710550	-0.21525	0.280791
P46662	Nf2	Isoform 2 of Merlin OS=Mus musculus GN=Nf2	316089	318393	375076	329775	406522	334674	351711	332546	302417	341782	0.0104311	0.584679
P46664	Adss	Adenylosuccinate synthetase isozyme 2 OS=Mus musculus GN=Adss PE=1 SV=2	6.1268e+06	6.64455e+06	6.77015e+06	6.63873e+06	6.43221e+06	6.44039e+06	7.37316e+06	6.47964e+06	7.04836e+06	6.64129e+06	-0.000456823	0.450719
P46718	Pdcd2	Programmed cell death protein 2 OS=Mus musculus GN=Pdcd2 PE=2 SV=2	51870.8	54323.3	55437.5	52410	61906.3	50999	48467.7	55346.4	53157.2	54932.1	-0.0587217	0.446895
P46735	Myo1b	Unconventional myosin-Ib OS=Mus musculus GN=Myo1b PE=2 SV=3	5.82093e+06	4.26626e+06	4.36512e+06	5.11961e+06	3.87435e+06	3.67901e+06	3.88624e+06	4.04939e+06	4.06531e+06	3.81581e+06	-0.279989	0.107102
P46737	Brcc3	Lys-63-specific deubiquitinase BRCC36 OS=Mus musculus GN=Brcc3 PE=2 SV=1	1.71632e+06	1.47164e+06	1.74794e+06	903335	1.60639e+06	1.8967e+06	1.8664e+06	1.75472e+06	1.84187e+06	1.85573e+06	0.312269	0.155395
P46935	Nedd4	E3 ubiquitin-protein ligase NEDD4 OS=Mus musculus GN=Nedd4 PE=1 SV=3	2.04691e+07	1.60337e+07	2.00808e+07	1.06554e+07	2.0293e+07	2.29519e+07	2.25236e+07	2.32112e+07	2.28319e+07	2.30957e+07	0.297072	0.0934624
P46938-2	Yap1	Isoform 2 of Transcriptional coactivator YAP1 OS=Mus musculus GN=Yap1	671522	577429	621427	561254	658596	563039	537622	587227	600234	622975	-0.137177	0.378293
P46978	Stt3a	Dolichyl-diphosphooligosaccharide--protein glycosyltransferase subunit STT3A OS=Mus musculus GN=Stt3a PE=1 SV=1	8.37527e+06	8.28005e+06	7.99956e+06	8.84735e+06	6.90733e+06	8.4179e+06	8.27834e+06	7.64919e+06	7.62039e+06	7.20783e+06	-0.188395	0.703076
P47199	Cryz	Quinone oxidoreductase OS=Mus musculus GN=Cryz PE=1 SV=1	5.44031e+06	4.85588e+06	5.19673e+06	5.13268e+06	4.01412e+06	4.6101e+06	5.22054e+06	4.14325e+06	4.92361e+06	4.19098e+06	-0.26237	0.511028
P47226	Tes	Isoform TES1 of Testin OS=Mus musculus GN=Tes	458135	376472	368771	469966	305943	474502	470574	394033	437367	413661	0.337388	0.345704
P47713	Pla2g4a	Cytosolic phospholipase A2 OS=Mus musculus GN=Pla2g4a PE=1 SV=1	1.3614e+06	1.29437e+06	1.50052e+06	1.25437e+06	1.46879e+06	1.31657e+06	1.29057e+06	1.338e+06	1.34215e+06	1.30973e+06	-0.0766112	0.492889
P47738	Aldh2	"Aldehyde dehydrogenase, mitochondrial OS=Mus musculus GN=Aldh2 PE=1 SV=1"	7.99764e+07	1.06768e+08	8.26528e+07	9.79049e+07	8.80242e+07	6.8812e+07	6.7814e+07	7.05387e+07	6.7456e+07	8.03213e+07	-0.554257	0.0241381
P47740	Aldh3a2	Fatty aldehyde dehydrogenase OS=Mus musculus GN=Aldh3a2 PE=2 SV=2	1.2462e+07	1.19025e+07	1.19065e+07	1.32095e+07	1.14484e+07	1.35666e+07	1.30401e+07	1.21376e+07	1.20471e+07	1.19473e+07	0.0278527	0.616124
P47753	Capza1	F-actin-capping protein subunit alpha-1 OS=Mus musculus GN=Capza1 PE=1 SV=4	4.50724e+06	4.10685e+06	4.23015e+06	3.87785e+06	4.2968e+06	4.85917e+06	4.63981e+06	4.74621e+06	4.60121e+06	4.81896e+06	0.239689	0.0384518
P47754	Capza2	F-actin-capping protein subunit alpha-2 OS=Mus musculus GN=Capza2 PE=1 SV=3	6.65236e+06	6.57457e+06	6.57581e+06	5.85692e+06	6.82655e+06	7.89454e+06	7.99041e+06	7.07965e+06	7.57055e+06	7.42569e+06	0.29495	0.0242937
P47757-4	Capzb	Isoform 3 of F-actin-capping protein subunit beta OS=Mus musculus GN=Capzb	8.59405e+06	8.89534e+06	8.64153e+06	8.72796e+06	9.18381e+06	9.15497e+06	1.02582e+07	9.5697e+06	8.59297e+06	1.05073e+07	0.176893	0.173786
P47758	Srprb	Signal recognition particle receptor subunit beta OS=Mus musculus GN=Srprb PE=1 SV=1	1.76539e+06	2.08715e+06	1.86996e+06	2.67399e+06	2.0742e+06	1.70335e+06	1.85677e+06	1.78048e+06	1.78768e+06	1.77929e+06	-0.363941	0.145117
P47791	Gsr	"Glutathione reductase, mitochondrial OS=Mus musculus GN=Gsr PE=1 SV=3"	7.78912e+06	7.48136e+06	7.58364e+06	7.42786e+06	6.86528e+06	6.226e+06	6.21988e+06	5.95978e+06	6.42115e+06	6.44506e+06	-0.443964	0.0102347
P47802	Mtx1	Metaxin-1 OS=Mus musculus GN=Mtx1 PE=1 SV=1	1.76838e+06	1.81937e+06	1.52245e+06	1.9651e+06	1.88808e+06	1.6026e+06	1.59479e+06	1.50019e+06	1.54803e+06	1.62004e+06	-0.302709	0.0854658
P47809	Map2k4	Dual specificity mitogen-activated protein kinase kinase 4 OS=Mus musculus GN=Map2k4 PE=1 SV=2	2.53762e+06	2.69409e+06	2.37627e+06	2.89334e+06	2.29685e+06	3.1139e+06	3.05292e+06	2.67173e+06	2.65228e+06	2.72527e+06	0.156741	0.185489
P47811	Mapk14	Mitogen-activated protein kinase 14 OS=Mus musculus GN=Mapk14 PE=1 SV=3	4.35251e+06	4.38183e+06	4.08508e+06	4.24898e+06	4.16585e+06	5.11132e+06	5.06137e+06	4.49583e+06	4.5192e+06	4.6895e+06	0.211598	0.0513286
P47856	Gfpt1	Isoform 2 of Glutamine--fructose-6-phosphate aminotransferase [isomerizing] 1 OS=Mus musculus GN=Gfpt1	2.83646e+06	2.98666e+06	2.80828e+06	3.09791e+06	3.23844e+06	3.06229e+06	2.88213e+06	2.82949e+06	2.94797e+06	2830005	-0.0824324	0.612463
P47857-2	Pfkm	"Isoform 2 of ATP-dependent 6-phosphofructokinase, muscle type OS=Mus musculus GN=Pfkm"	5.65738e+06	4.86574e+06	5.55212e+06	5.13993e+06	5.44935e+06	5.50097e+06	5.88583e+06	5.01267e+06	4.73062e+06	5.29019e+06	-0.0773849	0.894376
P47879	Igfbp4	Insulin-like growth factor-binding protein 4 OS=Mus musculus GN=Igfbp4 PE=2 SV=2	435779	433729	417360	465558	451814	475385	481154	451863	436936	449413	0.0665813	0.406369
P47880	Igfbp6	Insulin-like growth factor-binding protein 6 OS=Mus musculus GN=Igfbp6 PE=2 SV=2	1.10994e+06	1.06813e+06	1.04158e+06	1.01476e+06	1.08293e+06	988643	1.05337e+06	1.06404e+06	1.05764e+06	982997	-0.0324554	0.477053
P47911	Rpl6	60S ribosomal protein L6 OS=Mus musculus GN=Rpl6 PE=1 SV=3	1.18488e+07	4.148e+06	1.25736e+07	3.18502e+06	1.03027e+07	1.15322e+07	1.25916e+07	1.10311e+07	1.12741e+07	1.0561e+07	0.157949	0.238202
P47915	Rpl29	60S ribosomal protein L29 OS=Mus musculus GN=Rpl29 PE=2 SV=2	1.45776e+06	469172	1.5979e+06	424619	1.42586e+06	1.34675e+06	1.43202e+06	1.29403e+06	1.24742e+06	1.14763e+06	-0.216117	0.387705
P47934	Crat	Carnitine O-acetyltransferase OS=Mus musculus GN=Crat PE=1 SV=3	1.59164e+07	2.14762e+07	1.54971e+07	1.56453e+07	1.77887e+07	1.41602e+07	1.43966e+07	1.49909e+07	1.51756e+07	1.53857e+07	-0.150024	0.122338
P47941	Crkl	Crk-like protein OS=Mus musculus GN=Crkl PE=1 SV=2	1.51948e+06	1.45866e+06	1.61068e+06	1.64608e+06	1.35225e+06	1.29771e+06	1.27939e+06	1.41154e+06	1.32793e+06	1.37984e+06	-0.309389	0.0713458
P47955	Rplp1	60S acidic ribosomal protein P1 OS=Mus musculus GN=Rplp1 PE=2 SV=1	1.7261e+06	830123	1.96117e+06	352519	1.67195e+06	1.43384e+06	1.55183e+06	1.61356e+06	1.66577e+06	1.5503e+06	-0.149089	0.414329
P47962	Rpl5	60S ribosomal protein L5 OS=Mus musculus GN=Rpl5 PE=1 SV=3	1.63206e+07	1.1365e+07	1.55036e+07	7.33975e+06	1.43054e+07	1.68996e+07	1.73922e+07	1.53652e+07	1.54663e+07	1.56126e+07	0.185239	0.197466
P47963	Rpl13	60S ribosomal protein L13 OS=Mus musculus GN=Rpl13 PE=2 SV=3	4.45086e+06	2.35139e+06	4.82862e+06	2.0964e+06	4.22594e+06	4.53725e+06	4.60998e+06	4.22447e+06	4.54024e+06	4.10396e+06	0.127269	0.262444
P47964	Rpl36	60S ribosomal protein L36 OS=Mus musculus GN=Rpl36 PE=2 SV=2	1.55742e+06	905707	1.66928e+06	936011	1.57342e+06	1.48265e+06	1.45714e+06	1.56066e+06	1.50458e+06	1.47156e+06	-0.0969539	0.396493
P47968	Rpia	Ribose-5-phosphate isomerase OS=Mus musculus GN=Rpia PE=2 SV=2	1.10774e+06	1.21373e+06	1.22963e+06	1.31135e+06	1.33698e+06	1.17845e+06	1.15237e+06	1.14678e+06	1.18655e+06	1.19684e+06	-0.0965704	0.337054
P48024	Eif1	Eukaryotic translation initiation factor 1 OS=Mus musculus GN=Eif1 PE=2 SV=2	1.81824e+06	1.54053e+06	1.59787e+06	1.62767e+06	1.64176e+06	1.8069e+06	1.67508e+06	1.59384e+06	1.63107e+06	1.89813e+06	0.046237	0.498793
P48025	Syk	Tyrosine-protein kinase SYK OS=Mus musculus GN=Syk PE=1 SV=2	872715	941297	854428	1.12739e+06	796599	956028	908279	835982	923815	837837	0.0864809	0.815306
P48036	Anxa5	Annexin A5 OS=Mus musculus GN=Anxa5 PE=1 SV=1	1.34928e+08	1.16339e+08	1.27699e+08	1.30712e+08	1.30291e+08	1.46512e+08	1.44618e+08	1.44459e+08	1.45066e+08	1.51265e+08	0.222326	0.0242937
P48193	Epb41	Protein 4.1 OS=Mus musculus GN=Epb41 PE=1 SV=2	6.58292e+06	6.91111e+06	7.62073e+06	6.18282e+06	7.13833e+06	6.29402e+06	7.03685e+06	6.88536e+06	7.08987e+06	6.54926e+06	-0.0194565	0.824513
P48377	Rfx1	MHC class II regulatory factor RFX1 OS=Mus musculus GN=Rfx1 PE=2 SV=2	380891	362426	359629	357983	325323	350377	331757	319740	351790	341277	-0.136499	0.331483
P48410	Abcd1	ATP-binding cassette sub-family D member 1 OS=Mus musculus GN=Abcd1 PE=1 SV=1	436548	465122	437448	524615	463766	496264	493823	431277	463779	445373	-0.0150494	0.979815
P48428	Tbca	Tubulin-specific chaperone A OS=Mus musculus GN=Tbca PE=2 SV=3	1.87402e+06	2.08062e+06	1.92659e+06	2.49341e+06	1.93289e+06	1.98993e+06	2.09085e+06	1.9396e+06	2.11566e+06	2.0101e+06	0.0710294	0.904916
P48441	Idua	Alpha-L-iduronidase OS=Mus musculus GN=Idua PE=1 SV=2	494951	506301	507210	529443	499577	488819	497797	483577	497187	491221	-0.0695015	0.414694
P48453-2	Ppp3cb	Isoform 1 of Serine/threonine-protein phosphatase 2B catalytic subunit beta isoform OS=Mus musculus GN=Ppp3cb	1.24275e+06	1.16242e+06	1.54905e+06	1.22881e+06	1.50934e+06	930245	966221	1.01466e+06	1.13991e+06	958155	-0.62937	0.018368
P48455	Ppp3cc	Serine/threonine-protein phosphatase 2B catalytic subunit gamma isoform OS=Mus musculus GN=Ppp3cc PE=2 SV=1	26616.5	22365	29505.6	38818.9	30714.1	17519.8	17069.9	21429	18754.8	20161.7	-1.11523	0.0150479
P48678	Lmna	Prelamin-A/C OS=Mus musculus GN=Lmna PE=1 SV=2	3.40559e+07	1.80748e+07	2.61993e+07	1.67658e+07	2.24565e+07	1.84384e+07	1.9649e+07	2.09618e+07	2.90018e+07	1.79034e+07	-0.334098	0.681549
P48722	Hspa4l	Heat shock 70 kDa protein 4L OS=Mus musculus GN=Hspa4l PE=1 SV=2	5.75719e+06	6.39613e+06	5.79064e+06	9.56903e+06	5.60447e+06	6.63995e+06	6.23858e+06	6.01062e+06	6.33347e+06	6.39091e+06	0.190855	0.866126
P48725	Pcnt	Pericentrin OS=Mus musculus GN=Pcnt PE=1 SV=2	661752	541858	633110	576309	644455	563042	530138	598562	636333	555659	-0.263123	0.425427
P48758	Cbr1	Carbonyl reductase [NADPH] 1 OS=Mus musculus GN=Cbr1 PE=1 SV=3	8.26344e+06	9.07606e+06	8.18747e+06	8.49484e+06	8.83747e+06	8.69648e+06	8.39141e+06	8.34727e+06	8.68582e+06	8.60993e+06	0.000934557	0.965514
P48760-3	Fpgs	"Isoform 2 of Folylpolyglutamate synthase, mitochondrial OS=Mus musculus GN=Fpgs"	170138	159196	161367	151923	166237	159741	157109	178846	158105	149826	-0.0571783	0.907956
P48771	Cox7a2	"Cytochrome c oxidase subunit 7A2, mitochondrial OS=Mus musculus GN=Cox7a2 PE=1 SV=2"	6.11158e+06	7.6518e+06	6.0444e+06	7.01585e+06	7.05479e+06	5.95363e+06	6.17484e+06	5.61311e+06	5.34464e+06	5.7844e+06	-0.456363	0.0611542
P48774	Gstm5	Glutathione S-transferase Mu 5 OS=Mus musculus GN=Gstm5 PE=1 SV=1	3.59103e+07	1.7369e+07	3.29163e+07	2.1498e+07	8.91542e+06	1.31083e+07	2.25093e+07	9.20455e+06	2.43506e+07	9.28981e+06	-1.32742	0.38401
P48962	Slc25a4	ADP/ATP translocase 1 OS=Mus musculus GN=Slc25a4 PE=1 SV=4	2.01448e+07	1.98539e+07	1.91138e+07	1.88135e+07	1.83637e+07	1.81038e+07	1.93416e+07	2.01754e+07	1.87366e+07	2.00903e+07	0.0243463	0.98185
P48999	Alox5	Arachidonate 5-lipoxygenase OS=Mus musculus GN=Alox5 PE=1 SV=3	2.0604e+06	2.06798e+06	2.29746e+06	2.07981e+06	2.205e+06	2.29648e+06	2.1082e+06	2.20591e+06	2.05091e+06	2.05882e+06	0.0051782	0.98871
P49070	Camlg	Calcium signal-modulating cyclophilin ligand OS=Mus musculus GN=Camlg PE=1 SV=2	1.44697e+06	1.63328e+06	1.60322e+06	1.72867e+06	1.77211e+06	1.53646e+06	1.62043e+06	1.66773e+06	1.6076e+06	1.58665e+06	-0.0445366	0.775189
P49138	Mapkapk2	MAP kinase-activated protein kinase 2 OS=Mus musculus GN=Mapkapk2 PE=1 SV=2	888148	950848	931637	1.05427e+06	947840	969705	1.00698e+06	935072	923224	950066	-0.00147217	0.955183
P49182	Serpind1	Heparin cofactor 2 OS=Mus musculus GN=Serpind1 PE=1 SV=1	2.25299e+06	2.42492e+06	2.42012e+06	2.28234e+06	2.30359e+06	2.30161e+06	2.22781e+06	2.22664e+06	2.24453e+06	2.23392e+06	-0.0837343	0.341439
P49222	Epb42	Erythrocyte membrane protein band 4.2 OS=Mus musculus GN=Epb42 PE=2 SV=3	1.07963e+06	1.00745e+06	1.28812e+06	799111	1.33804e+06	1.12898e+06	1.27594e+06	1.14198e+06	1.03769e+06	1.25101e+06	0.111036	0.603508
P49290	Epx	Eosinophil peroxidase OS=Mus musculus GN=Epx PE=1 SV=2	1.66979e+06	1.311e+06	2.27667e+06	1.30569e+06	2.31311e+06	1.94827e+06	1.5663e+06	1.6433e+06	1.59621e+06	1.47283e+06	-0.113082	0.798272
P49300	Clec10a	C-type lectin domain family 10 member A OS=Mus musculus GN=Clec10a PE=1 SV=1	2.56218e+06	2.58115e+06	2.34596e+06	2.6846e+06	2.15247e+06	2.52937e+06	2.11452e+06	2.12318e+06	1.96766e+06	1.94902e+06	-0.437946	0.113915
P49312	Hnrnpa1	Heterogeneous nuclear ribonucleoprotein A1 OS=Mus musculus GN=Hnrnpa1 PE=1 SV=2	2.08535e+07	1.63789e+07	2.22386e+07	1.41939e+07	1.81319e+07	1.65493e+07	1.70831e+07	1.62429e+07	1.7776e+07	14783720	-0.214994	0.41288
P49429	Hpd	4-hydroxyphenylpyruvate dioxygenase OS=Mus musculus GN=Hpd PE=1 SV=3	3.643e+06	3.32495e+06	3.84743e+06	5.61026e+06	3.27556e+06	1.65216e+06	1.29322e+06	1.63122e+06	2.35963e+06	2.20648e+06	-2.0205	0.00737697
P49442	Inpp1	Inositol polyphosphate 1-phosphatase OS=Mus musculus GN=Inpp1 PE=1 SV=2	2.0255e+06	1.92468e+06	1.94292e+06	2.17473e+06	1.79023e+06	2.15672e+06	1.94491e+06	2.0091e+06	1.99227e+06	2.15972e+06	0.0601924	0.497888
P49443	Ppm1a	Protein phosphatase 1A OS=Mus musculus GN=Ppm1a PE=1 SV=1	4.44976e+06	4.6374e+06	4.46818e+06	4.75373e+06	4.53579e+06	4.71076e+06	4.54231e+06	4.44183e+06	4.3297e+06	4.54444e+06	-0.0093744	0.788298
P49586	Pcyt1a	Choline-phosphate cytidylyltransferase A OS=Mus musculus GN=Pcyt1a PE=1 SV=1	1.05266e+06	963949	1.13943e+06	944884	1.08499e+06	1.03553e+06	991756	960061	1.0095e+06	998975	-0.11994	0.560564
P49615	Cdk5	Cyclin-dependent-like kinase 5 OS=Mus musculus GN=Cdk5 PE=1 SV=1	1.21373e+06	1.38375e+06	1.28387e+06	1.4523e+06	1.15331e+06	1.36832e+06	1.56296e+06	1.37032e+06	1.43328e+06	1.45271e+06	0.230008	0.157409
P49710	Hcls1	Hematopoietic lineage cell-specific protein OS=Mus musculus GN=Hcls1 PE=1 SV=2	3.59858e+06	3.39709e+06	3.63671e+06	3.2845e+06	3.4806e+06	3.86993e+06	3.44504e+06	3.13593e+06	3.08323e+06	3.29597e+06	-0.138391	0.602188
P49718	Mcm5	DNA replication licensing factor MCM5 OS=Mus musculus GN=Mcm5 PE=2 SV=1	283173	183485	282513	255639	215067	232516	265377	201334	263852	218117	-0.25828	0.870569
P49722	Psma2	Proteasome subunit alpha type-2 OS=Mus musculus GN=Psma2 PE=1 SV=3	1.65318e+07	1.76595e+07	1.70689e+07	1.65278e+07	1.65584e+07	1.58198e+07	1.71702e+07	1.57309e+07	1.75126e+07	1.72223e+07	0.0599006	0.831029
P49769	Psen1	Presenilin-1 OS=Mus musculus GN=Psen1 PE=1 SV=1	271229	246867	334602	246456	262585	204653	224886	264527	250099	234329	-0.275334	0.16468
P49817	Cav1	Caveolin-1 OS=Mus musculus GN=Cav1 PE=1 SV=1	2.04645e+08	1.33657e+08	1.31752e+08	1.73225e+08	1.19565e+08	1.77473e+08	1.38291e+08	2.00859e+08	2.09557e+08	2.00765e+08	0.918921	0.223855
P49891	Sult1e1	"Estrogen sulfotransferase, testis isoform OS=Mus musculus GN=Sult1e1 PE=1 SV=2"	7.39646e+06	5.78446e+06	6.76144e+06	7.04475e+06	2.75775e+06	3.54584e+06	3.4355e+06	5.23904e+06	3.58736e+06	2.97077e+06	-1.48981	0.132575
P49935	Ctsh	Pro-cathepsin H OS=Mus musculus GN=Ctsh PE=2 SV=2	5.25972e+06	5.49297e+06	5.90939e+06	6.43393e+06	4.61192e+06	4.78691e+06	4.54927e+06	4.56771e+06	4.57872e+06	4.49899e+06	-0.426387	0.0511638
P49962	Srp9	Signal recognition particle 9 kDa protein OS=Mus musculus GN=Srp9 PE=1 SV=2	856530	806880	755852	513037	814781	1.00237e+06	1.1243e+06	871602	905462	928696	0.324673	0.0774038
P50096	Impdh1	Inosine-5'-monophosphate dehydrogenase 1 OS=Mus musculus GN=Impdh1 PE=2 SV=2	902822	1.16379e+06	1.09832e+06	1.2387e+06	1.1078e+06	1.07023e+06	1.20492e+06	1.11162e+06	1.10635e+06	1.11094e+06	-0.0166267	0.807873
P50114	S100b	Protein S100-B OS=Mus musculus GN=S100b PE=2 SV=2	176370	179486	223065	226905	161635	281006	321262	224506	225385	297629	1.08432	0.0358069
P50136	Bckdha	"2-oxoisovalerate dehydrogenase subunit alpha, mitochondrial OS=Mus musculus GN=Bckdha PE=1 SV=1"	6.44208e+06	7.88067e+06	6.61889e+06	4.62668e+06	8115588	6.46905e+06	6.2448e+06	6.97919e+06	6.80826e+06	7.27122e+06	0.04945	0.898017
P50153	Gng4	Guanine nucleotide-binding protein G(I)/G(S)/G(O) subunit gamma-4 OS=Mus musculus GN=Gng4 PE=2 SV=1	235306	198590	208215	220272	233026	200755	189199	208685	184761	203443	-0.253581	0.113862
P50171-2	Hsd17b8	Isoform Long of Estradiol 17-beta-dehydrogenase 8 OS=Mus musculus GN=Hsd17b8	1.69672e+06	2.15869e+06	1.92628e+06	1.96349e+06	2.08651e+06	1.85345e+06	1.89703e+06	2.00612e+06	1.83578e+06	1.89628e+06	-0.115768	0.633934
P50172	Hsd11b1	Corticosteroid 11-beta-dehydrogenase isozyme 1 OS=Mus musculus GN=Hsd11b1 PE=1 SV=3	2.41593e+07	3.12715e+07	2.52711e+07	2.65898e+07	2.87386e+07	6.5527e+06	7.34926e+06	8.91779e+06	8.28259e+06	8.9028e+06	-2.91719	2.82e-05
P50247	Ahcy	Adenosylhomocysteinase OS=Mus musculus GN=Ahcy PE=1 SV=3	2.09858e+07	2.07502e+07	2.38291e+07	2.50112e+07	1.92347e+07	1.63952e+07	1.66462e+07	1.929e+07	1.78304e+07	1.75135e+07	-0.423697	0.0246601
P50284	Ltbr	Tumor necrosis factor receptor superfamily member 3 OS=Mus musculus GN=Ltbr PE=1 SV=1	157936	168926	168971	306667	155325	144681	127261	160796	156460	129392	-0.376748	0.16929
P50285	Fmo1	Dimethylaniline monooxygenase [N-oxide-forming] 1 OS=Mus musculus GN=Fmo1 PE=1 SV=1	1.81092e+07	2.38642e+07	1.79861e+07	2.08941e+07	2.29297e+07	1.75413e+07	1.72413e+07	1.9629e+07	1.78736e+07	2.00575e+07	-0.40345	0.230023
P50295	Nat2	Arylamine N-acetyltransferase 2 OS=Mus musculus GN=Nat2 PE=1 SV=1	513690	502126	561762	484146	509157	474815	459976	492611	497605	464192	-0.168934	0.16929
P50396	Gdi1	Rab GDP dissociation inhibitor alpha OS=Mus musculus GN=Gdi1 PE=1 SV=3	1.20186e+07	1.22837e+07	1.12807e+07	1.31772e+07	1.22983e+07	1.28299e+07	1.2087e+07	1.21985e+07	1.15326e+07	1.29578e+07	-0.0257332	0.880378
P50427	Sts	Steryl-sulfatase OS=Mus musculus GN=Sts PE=2 SV=1	2.95073e+06	3.1859e+06	3.19833e+06	3.33912e+06	3.52464e+06	3.006e+06	2.9232e+06	3.00081e+06	3.12359e+06	3.2118e+06	-0.143205	0.298009
P50428	Arsa	Arylsulfatase A OS=Mus musculus GN=Arsa PE=2 SV=2	1.53754e+06	1.64236e+06	1.6222e+06	1.7302e+06	1.87028e+06	1.46409e+06	1.43876e+06	1.52769e+06	1.40487e+06	1.72528e+06	-0.268082	0.157111
P50429	Arsb	Arylsulfatase B OS=Mus musculus GN=Arsb PE=2 SV=3	1.82041e+06	1.81376e+06	1.87164e+06	1.85934e+06	1.73546e+06	1.61092e+06	1.67901e+06	1.91223e+06	1.62292e+06	1.72117e+06	-0.189355	0.249471
P50431	Shmt1	"Serine hydroxymethyltransferase, cytosolic OS=Mus musculus GN=Shmt1 PE=1 SV=3"	1.35925e+06	1.4766e+06	1.42321e+06	1.68421e+06	1.32653e+06	1.05194e+06	1.09166e+06	1.0499e+06	1.121e+06	1.23825e+06	-0.624429	0.0106236
P50516	Atp6v1a	V-type proton ATPase catalytic subunit A OS=Mus musculus GN=Atp6v1a PE=1 SV=2	1.45982e+07	1.61834e+07	1.49602e+07	1.61714e+07	1.58167e+07	1.6108e+07	1.70725e+07	1.47614e+07	1.57639e+07	1.57871e+07	-0.0167011	0.687708
P50518	Atp6v1e1	V-type proton ATPase subunit E 1 OS=Mus musculus GN=Atp6v1e1 PE=1 SV=2	4.56962e+06	4.62997e+06	4.36177e+06	4.71155e+06	4.36556e+06	5.46014e+06	5.20957e+06	4.73796e+06	4.70759e+06	4.86595e+06	0.138714	0.0957427
P50543	S100a11	Protein S100-A11 OS=Mus musculus GN=S100a11 PE=1 SV=1	8.83824e+07	8.53779e+07	7.29445e+07	9.66825e+07	8.57164e+07	1.79385e+08	1.85767e+08	1.39962e+08	1.26828e+08	1.59323e+08	1.42812	0.00335613
P50544	Acadvl	"Very long-chain specific acyl-CoA dehydrogenase, mitochondrial OS=Mus musculus GN=Acadvl PE=1 SV=3"	3.84609e+07	4.17162e+07	3.72246e+07	3.81179e+07	3.65426e+07	3.55014e+07	3.70672e+07	3.78441e+07	3.71308e+07	3.70379e+07	-0.0879348	0.413226
P50580	Pa2g4	Proliferation-associated protein 2G4 OS=Mus musculus GN=Pa2g4 PE=1 SV=3	1.15276e+07	1.27582e+07	1.25294e+07	1.29561e+07	1.13993e+07	1.19196e+07	1.28548e+07	1.20343e+07	1.23261e+07	1.18427e+07	-0.10153	0.972998
P50608	Fmod	Fibromodulin OS=Mus musculus GN=Fmod PE=2 SV=1	2.8646e+06	1.78557e+06	2.83483e+06	2.06065e+06	1.74742e+06	1.57306e+06	2.0049e+06	1.2511e+06	1.4243e+06	1.84664e+06	-0.87544	0.0956358
P50637	Tspo	Translocator protein OS=Mus musculus GN=Tspo PE=1 SV=1	601538	790576	702934	743877	1.04287e+06	982114	829406	862257	800701	925787	0.327188	0.288737
P51125	Cast	Calpastatin OS=Mus musculus GN=Cast PE=1 SV=2	9.95787e+06	9.58984e+06	8.38885e+06	9.14208e+06	8.69308e+06	1.22247e+07	1.21582e+07	1.08577e+07	1.06551e+07	1.12321e+07	0.475277	0.0121723
P51150	Rab7a	Ras-related protein Rab-7a OS=Mus musculus GN=Rab7a PE=1 SV=2	1.9971e+07	1.86222e+07	1.9058e+07	2.00007e+07	1.66559e+07	2.10774e+07	2.0071e+07	1.99249e+07	1.90577e+07	1.94812e+07	0.0839762	0.345704
P51163	Uros	Uroporphyrinogen-III synthase OS=Mus musculus GN=Uros PE=2 SV=1	914201	1.09366e+06	974342	1.04687e+06	1.1106e+06	1.0186e+06	1.05509e+06	1.06704e+06	1.0223e+06	1.04483e+06	-0.037811	0.808875
P51174	Acadl	"Long-chain specific acyl-CoA dehydrogenase, mitochondrial OS=Mus musculus GN=Acadl PE=1 SV=2"	2.66552e+07	3.28855e+07	28066067	2.93863e+07	3.14989e+07	3.07695e+07	3.10837e+07	3.07813e+07	3.02595e+07	3.23306e+07	0.0839777	0.448518
P51175	Ppox	Protoporphyrinogen oxidase OS=Mus musculus GN=Ppox PE=1 SV=1	984611	1.07646e+06	1.05477e+06	1.08337e+06	1.0012e+06	898678	930846	906948	899780	894426	-0.359039	0.0159209
P51410	Rpl9	60S ribosomal protein L9 OS=Mus musculus GN=Rpl9 PE=1 SV=2	1.18318e+07	7.94476e+06	1.24795e+07	7.18801e+06	1.30272e+07	1.67857e+07	1.68091e+07	1.33902e+07	1.3455e+07	1.50479e+07	0.531777	0.052285
P51432	Plcb3	"1-phosphatidylinositol 4,5-bisphosphate phosphodiesterase beta-3 OS=Mus musculus GN=Plcb3 PE=2 SV=2"	3.09126e+06	3.06131e+06	3.01686e+06	3.24852e+06	3.08426e+06	3.15083e+06	3.10401e+06	3.06005e+06	3.03312e+06	3.06419e+06	-0.0235179	0.899604
P51655	Gpc4	Glypican-4 OS=Mus musculus GN=Gpc4 PE=2 SV=2	1.89606e+06	1.36109e+06	1.51975e+06	1.24012e+06	1.44634e+06	1.71882e+06	1.79945e+06	1.87732e+06	1.8773e+06	1.69217e+06	0.487828	0.0819248
P51658	Hsd17b2	Estradiol 17-beta-dehydrogenase 2 OS=Mus musculus GN=Hsd17b2 PE=2 SV=2	345509	308407	438541	395588	275343	169735	195889	196987	242742	246507	-1.32882	0.0112167
P51660	Hsd17b4	Peroxisomal multifunctional enzyme type 2 OS=Mus musculus GN=Hsd17b4 PE=1 SV=3	3.29235e+07	3.85161e+07	3.27463e+07	4.04371e+07	3.43309e+07	4.24416e+07	4.81084e+07	4.2219e+07	4.4202e+07	4.23779e+07	0.471223	0.022726
P51670	Ccl9	C-C motif chemokine 9 OS=Mus musculus GN=Ccl9 PE=1 SV=1	54554.7	44143.2	59039.9	54428.6	55516.2	55983.6	50947.4	52395	71353.4	48898.2	-0.130183	0.747336
P51807	Dynlt1	Dynein light chain Tctex-type 1 OS=Mus musculus GN=Dynlt1 PE=1 SV=1	455313	387693	387902	383935	382208	393560	417986	385098	406203	415332	0.0980468	0.848656
P51830	Adcy9	Adenylate cyclase type 9 OS=Mus musculus GN=Adcy9 PE=1 SV=1	159023	146800	164271	170172	164168	140594	160257	152709	149208	149314	-0.216738	0.226812
P51855	Gss	Glutathione synthetase OS=Mus musculus GN=Gss PE=2 SV=1	4.95859e+06	4.72292e+06	5.17927e+06	5.08404e+06	4.90548e+06	4.7057e+06	5.01613e+06	4.8412e+06	5.05808e+06	4.74334e+06	-0.0670696	0.667239
P51859	Hdgf	Hepatoma-derived growth factor OS=Mus musculus GN=Hdgf PE=1 SV=2	9.32443e+06	9.84084e+06	9.40053e+06	1.00821e+07	7.71651e+06	9.78868e+06	9.72761e+06	8.38944e+06	9.46168e+06	9.30993e+06	0.00191817	0.9166
P51863	Atp6v0d1	V-type proton ATPase subunit d 1 OS=Mus musculus GN=Atp6v0d1 PE=1 SV=2	1.52338e+06	1.60282e+06	1.63413e+06	1.63597e+06	1.5947e+06	1.65775e+06	1.87744e+06	1.56225e+06	1.71153e+06	1.64461e+06	0.0761215	0.321272
P51881	Slc25a5	ADP/ATP translocase 2 OS=Mus musculus GN=Slc25a5 PE=1 SV=3	1.24659e+07	1.5036e+07	1.25487e+07	1.31652e+07	1.38938e+07	1.08844e+07	1.14787e+07	1.18647e+07	1.22856e+07	1.19794e+07	-0.286496	0.056126
P51885	Lum	Lumican OS=Mus musculus GN=Lum PE=1 SV=2	5.28112e+07	5.3402e+07	4.89022e+07	4.90974e+07	3.95563e+07	5.12136e+07	4.36103e+07	4.27436e+07	3.82995e+07	4.86049e+07	-0.318325	0.422735
P51910	Apod	Apolipoprotein D OS=Mus musculus GN=Apod PE=2 SV=1	132596	133473	138584	152990	116993	132573	122275	159652	149835	127384	-0.0142099	0.813713
P51912	Slc1a5	Neutral amino acid transporter B(0) OS=Mus musculus GN=Slc1a5 PE=1 SV=2	1.06278e+07	1.13018e+07	1.05181e+07	1.24861e+07	1.1371e+07	1.01527e+07	1.146e+07	1.33005e+07	1.27871e+07	1.04738e+07	0.0332118	0.753743
P51949	Mnat1	CDK-activating kinase assembly factor MAT1 OS=Mus musculus GN=Mnat1 PE=2 SV=2	133876	145938	147073	163963	133929	121923	112418	128203	128422	130329	-0.302556	0.0519606
P52194	Clgn	Calmegin OS=Mus musculus GN=Clgn PE=1 SV=2	225408	534436	177307	1.48475e+06	204092	243485	241028	230205	231506	244751	0.0887697	0.412318
P52196	Tst	Thiosulfate sulfurtransferase OS=Mus musculus GN=Tst PE=1 SV=3	1.12814e+07	1.24392e+07	1.29584e+07	9.83233e+06	9.71734e+06	5.96306e+06	6.53712e+06	6.41931e+06	7.42289e+06	6.15723e+06	-1.28414	0.00295584
P52293	Kpna2	Importin subunit alpha-1 OS=Mus musculus GN=Kpna2 PE=1 SV=2	206279	210480	218975	183522	210050	188095	187606	192748	190767	180873	-0.254445	0.115184
P52332	Jak1	Tyrosine-protein kinase JAK1 OS=Mus musculus GN=Jak1 PE=1 SV=1	1.51025e+06	1.48666e+06	1.39575e+06	1.59973e+06	1.37715e+06	1.63215e+06	1.54439e+06	1.4773e+06	1.44511e+06	1.46136e+06	-0.023978	0.659715
P52430	Pon1	Serum paraoxonase/arylesterase 1 OS=Mus musculus GN=Pon1 PE=1 SV=2	3.82292e+06	3.97445e+06	4.31427e+06	4.25826e+06	4.3473e+06	4.3308e+06	4.73063e+06	4.79645e+06	4.42423e+06	4.59644e+06	0.148909	0.0857206
P52431	Pold1	DNA polymerase delta catalytic subunit OS=Mus musculus GN=Pold1 PE=1 SV=2	425706	379911	498237	450977	431497	301028	286234	421176	368750	363066	-0.401059	0.0622989
P52432	Polr1c	DNA-directed RNA polymerases I and III subunit RPAC1 OS=Mus musculus GN=Polr1c PE=1 SV=3	284074	262531	384842	337911	401731	210260	204780	250182	256377	221292	-1.07773	0.0202836
P52479-2	Usp10	Isoform 2 of Ubiquitin carboxyl-terminal hydrolase 10 OS=Mus musculus GN=Usp10	675393	578518	669314	531651	592578	732038	724714	563416	658634	578114	0.208884	0.514662
P52480-2	Pkm	Isoform M1 of Pyruvate kinase PKM OS=Mus musculus GN=Pkm	5.24627e+06	5.20666e+06	4.64218e+06	4.40944e+06	7.10239e+06	4.01691e+06	4.57478e+06	3.99058e+06	4.52011e+06	4.27602e+06	-0.456283	0.101249
P52480	Pkm	Pyruvate kinase PKM OS=Mus musculus GN=Pkm PE=1 SV=4	1.41417e+07	1.73646e+07	1.56868e+07	1.74869e+07	1.79157e+07	1.23905e+07	1.42403e+07	1.45361e+07	1.18572e+07	1.14353e+07	-0.776746	0.0260517
P52503	Ndufs6	"NADH dehydrogenase [ubiquinone] iron-sulfur protein 6, mitochondrial OS=Mus musculus GN=Ndufs6 PE=1 SV=2"	3.97701e+06	4.79975e+06	3.6629e+06	4.71884e+06	4.21051e+06	4.24042e+06	4.38133e+06	3.83883e+06	3.59991e+06	4.24937e+06	0.0062599	0.592947
P52623	Uck1	Uridine-cytidine kinase 1 OS=Mus musculus GN=Uck1 PE=2 SV=2	2.19709e+06	2.36364e+06	2.3485e+06	2.37969e+06	2.20973e+06	1.8605e+06	1.92775e+06	1.95857e+06	1.93371e+06	2.03289e+06	-0.43664	0.00899219
P52624	Upp1	Uridine phosphorylase 1 OS=Mus musculus GN=Upp1 PE=1 SV=2	627870	577756	593894	578909	520419	687284	666968	668109	650048	614889	0.29525	0.052708
P52633	Stat6	Signal transducer and transcription activator 6 OS=Mus musculus GN=Stat6 PE=1 SV=2	3.62643e+06	3.24128e+06	3.46252e+06	3.31345e+06	3.7377e+06	3.79326e+06	3.72202e+06	3.63868e+06	3.62706e+06	3.55027e+06	0.095495	0.288744
P52760	Hrsp12	Ribonuclease UK114 OS=Mus musculus GN=Hrsp12 PE=1 SV=3	5.15163e+06	4.30522e+06	4.67849e+06	4.88158e+06	3.70786e+06	5.65965e+06	4.08398e+06	4.3025e+06	4.16044e+06	4.01488e+06	-0.271048	0.847277
P52795	Efnb1	Ephrin-B1 OS=Mus musculus GN=Efnb1 PE=1 SV=1	1.7429e+06	1.86802e+06	1.66616e+06	1.82262e+06	1.69693e+06	1.87485e+06	1.83011e+06	1.94496e+06	1.86421e+06	2.17661e+06	0.163265	0.127005
P52825	Cpt2	"Carnitine O-palmitoyltransferase 2, mitochondrial OS=Mus musculus GN=Cpt2 PE=1 SV=2"	1.70029e+07	1.95483e+07	1.74858e+07	2.13901e+07	1.78621e+07	1.56674e+07	1.72413e+07	1.69142e+07	1.55589e+07	1.77597e+07	-0.108379	0.138882
P52840	Sult1a1	Sulfotransferase 1A1 OS=Mus musculus GN=Sult1a1 PE=2 SV=1	1.69764e+07	1.939e+07	1.58162e+07	2.05833e+07	1.72016e+07	1.66328e+07	1.56219e+07	1.46918e+07	1.6401e+07	1.55337e+07	-0.240995	0.11224
P52843	Sult2a1	Bile salt sulfotransferase 1 OS=Mus musculus GN=Sult2a1 PE=2 SV=1	336861	255586	268355	351508	256902	184725	176693	165816	214072	222054	-0.914372	0.0117253
P52875	Tmem165	Transmembrane protein 165 OS=Mus musculus GN=Tmem165 PE=2 SV=2	345111	343518	333170	344937	329622	405512	397229	357037	365461	369081	0.167748	0.0504711
P53026	Rpl10a	60S ribosomal protein L10a OS=Mus musculus GN=Rpl10a PE=1 SV=3	3.25129e+07	1.16962e+07	2.61605e+07	9.11122e+06	2.44182e+07	3.30526e+07	3.21191e+07	2.91026e+07	2.87936e+07	2.86624e+07	0.352849	0.147607
P53395	Dbt	"Lipoamide acyltransferase component of branched-chain alpha-keto acid dehydrogenase complex, mitochondrial OS=Mus musculus GN=Dbt PE=1 SV=2"	9.52997e+06	1.05256e+07	9.46955e+06	9.04278e+06	1.00832e+07	8.50653e+06	8.64494e+06	9.25937e+06	8.67264e+06	9.32713e+06	-0.221604	0.115013
P53566	Cebpa	CCAAT/enhancer-binding protein alpha OS=Mus musculus GN=Cebpa PE=1 SV=2	432501	387741	464131	545118	543805	329466	293583	452154	419341	343917	-0.714924	0.0829643
P53657	Pklr	Pyruvate kinase PKLR OS=Mus musculus GN=Pklr PE=2 SV=1	1.75705e+06	1.52386e+06	1.97527e+06	1.63963e+06	1.31737e+06	1.04026e+06	1.31055e+06	931642	1.52157e+06	1.13149e+06	-0.945123	0.0488859
P53702	Hccs	Cytochrome c-type heme lyase OS=Mus musculus GN=Hccs PE=1 SV=2	25833.3	27238.9	31136.4	26823.6	31509.1	25870.1	20299.8	26837.5	20138.9	24640.2	-0.249566	0.0773766
P53798	Fdft1	Squalene synthase OS=Mus musculus GN=Fdft1 PE=2 SV=2	203810	172246	229333	151067	152115	168473	168167	183390	188811	139098	-0.0507332	0.65335
P53810	Pitpna	Phosphatidylinositol transfer protein alpha isoform OS=Mus musculus GN=Pitpna PE=1 SV=2	5.96344e+06	6.21947e+06	5.8301e+06	6.54969e+06	6.23435e+06	6.45325e+06	6.3158e+06	5.78302e+06	5.95906e+06	5.98201e+06	-0.0895744	0.859601
P53811	Pitpnb	Phosphatidylinositol transfer protein beta isoform OS=Mus musculus GN=Pitpnb PE=1 SV=2	6.58863e+06	5.28549e+06	4.70749e+06	5.71701e+06	4.76534e+06	6.76584e+06	6.35866e+06	6.10105e+06	5.50394e+06	6.18109e+06	0.365555	0.169687
P53986	Slc16a1	Monocarboxylate transporter 1 OS=Mus musculus GN=Slc16a1 PE=1 SV=1	2.4956e+06	2.88954e+06	2.44119e+06	2.73255e+06	2.6375e+06	2.63673e+06	2.66609e+06	2.65824e+06	2.71635e+06	2.71875e+06	0.0110262	0.766357
P53994	Rab2a	Ras-related protein Rab-2A OS=Mus musculus GN=Rab2a PE=1 SV=1	1.15471e+07	1.24171e+07	1.14028e+07	1.30385e+07	1.14819e+07	1.29148e+07	1.34378e+07	1.23134e+07	1.24485e+07	1.30977e+07	0.252565	0.192544
P53995	Anapc1	Anaphase-promoting complex subunit 1 OS=Mus musculus GN=Anapc1 PE=2 SV=2	2.51199e+06	2.31194e+06	2.53036e+06	1.61151e+06	2.55315e+06	2.61626e+06	2.51242e+06	2.40964e+06	2.57592e+06	2.50759e+06	0.00479838	0.383609
P53996-3	Cnbp	Isoform 2 of Cellular nucleic acid-binding protein OS=Mus musculus GN=Cnbp	5.40197e+06	6.82931e+06	5.54713e+06	6.57939e+06	5.33223e+06	7.35767e+06	7.04224e+06	7.00907e+06	7.51546e+06	6.11682e+06	0.530392	0.0815644
P54071	Idh2	"Isocitrate dehydrogenase [NADP], mitochondrial OS=Mus musculus GN=Idh2 PE=1 SV=3"	2.41355e+07	2.23023e+07	2.16665e+07	2.22192e+07	2.01752e+07	2.20144e+07	2.1765e+07	2.04896e+07	2.17975e+07	2.30298e+07	-0.0545909	0.848372
P54103	Dnajc2	DnaJ homolog subfamily C member 2 OS=Mus musculus GN=Dnajc2 PE=1 SV=2	460522	456422	439394	508891	414712	518714	504587	460650	469623	480153	0.119222	0.288737
P54116	Stom	Erythrocyte band 7 integral membrane protein OS=Mus musculus GN=Stom PE=1 SV=3	1.59806e+06	1.63655e+06	1.69254e+06	2.02488e+06	1.90212e+06	1.32193e+06	1.52142e+06	1.5665e+06	1.55227e+06	1.55126e+06	-0.202233	0.0665602
P54227	Stmn1	Stathmin OS=Mus musculus GN=Stmn1 PE=1 SV=2	1.80157e+06	2.17859e+06	1.87722e+06	3.49217e+06	903270	1.99969e+06	2.36672e+06	1.43408e+06	1.8378e+06	1.55395e+06	-0.0606512	0.917975
P54276	Msh6	DNA mismatch repair protein Msh6 OS=Mus musculus GN=Msh6 PE=1 SV=3	105175	94602.9	98101.1	117047	88391.7	116706	92076	91824.2	85229.1	118749	-0.16663	0.987246
P54310-2	Lipe	Isoform 2 of Hormone-sensitive lipase OS=Mus musculus GN=Lipe	204435052	2.10522e+08	2.00854e+08	2.0456e+08	2.38583e+08	2.08533e+08	2.04615e+08	2.20758e+08	2.0747e+08	2.26827e+08	0.0135076	0.881343
P54320	Eln	Elastin OS=Mus musculus GN=Eln PE=2 SV=2	533399	346089	364566	396946	322877	443509	448839	403400	479227	370066	0.441947	0.448518
P54726	Rad23a	UV excision repair protein RAD23 homolog A OS=Mus musculus GN=Rad23a PE=1 SV=2	517367	538968	552643	498118	547072	533400	513911	568681	523112	524394	-0.0631666	0.950296
P54728	Rad23b	UV excision repair protein RAD23 homolog B OS=Mus musculus GN=Rad23b PE=1 SV=2	3.01842e+06	2.91661e+06	3.3108e+06	2.9561e+06	3.14003e+06	2.79825e+06	2.74259e+06	2.89697e+06	2.79854e+06	2.70007e+06	-0.178659	0.0713458
P54729	Nub1	NEDD8 ultimate buster 1 OS=Mus musculus GN=Nub1 PE=1 SV=2	1.95854e+06	2.09356e+06	2.2316e+06	1.96212e+06	2.22769e+06	1.90905e+06	2.02542e+06	2.04182e+06	2.33129e+06	2.12855e+06	-0.0665776	0.958791
P54731	Faf1	FAS-associated factor 1 OS=Mus musculus GN=Faf1 PE=2 SV=2	320014	373550	324764	395777	324355	413082	475430	380193	394260	420161	0.551675	0.0521845
P54761	Ephb4	Ephrin type-B receptor 4 OS=Mus musculus GN=Ephb4 PE=1 SV=2	705144	689588	699068	719588	657812	713407	740086	683342	713096	674334	0.0312115	0.753754
P54763	Ephb2	Isoform 2 of Ephrin type-B receptor 2 OS=Mus musculus GN=Ephb2	761026	831915	861283	827898	830048	990611	1.12194e+06	973454	1.02489e+06	965141	0.408622	0.00897972
P54775	Psmc4	26S protease regulatory subunit 6B OS=Mus musculus GN=Psmc4 PE=1 SV=2	9.50688e+06	9.70944e+06	9.10961e+06	9.16661e+06	8.92048e+06	1.06672e+07	1.10089e+07	9.65756e+06	9.70156e+06	9.90376e+06	0.162091	0.0999874
P54797	Tango2	Transport and Golgi organization 2 homolog OS=Mus musculus GN=Tango2 PE=2 SV=1	204990	230408	192398	227827	155285	279397	268360	201498	219137	235807	0.315673	0.174503
P54818	Galc	Galactocerebrosidase OS=Mus musculus GN=Galc PE=1 SV=2	281006	268621	270687	214224	263209	313398	310664	285987	311664	272080	0.317023	0.0938719
P54822	Adsl	Adenylosuccinate lyase OS=Mus musculus GN=Adsl PE=2 SV=2	9.71676e+06	1.07883e+07	1.06794e+07	1.27094e+07	1.01633e+07	1.023e+07	1.09842e+07	1.06229e+07	1.07597e+07	1.0969e+07	0.00404555	0.951264
P54823	Ddx6	Probable ATP-dependent RNA helicase DDX6 OS=Mus musculus GN=Ddx6 PE=1 SV=1	4.89393e+06	4.17784e+06	4.74498e+06	3.87043e+06	4.07519e+06	4.70238e+06	4.81588e+06	4.2248e+06	4.71382e+06	4.34152e+06	0.257594	0.517657
P54869	Hmgcs2	"Hydroxymethylglutaryl-CoA synthase, mitochondrial OS=Mus musculus GN=Hmgcs2 PE=1 SV=2"	1.2741e+07	1.16887e+07	1.38305e+07	1.35081e+07	9.53829e+06	7.5607e+06	7.10206e+06	6.83879e+06	9.13662e+06	7.96555e+06	-1.21426	0.00725173
P54923	Adprh	[Protein ADP-ribosylarginine] hydrolase OS=Mus musculus GN=Adprh PE=2 SV=1	4.16284e+06	4.13954e+06	3.98248e+06	4.08714e+06	3.88463e+06	4.34642e+06	4.05088e+06	4.10437e+06	3.94872e+06	4.05597e+06	-0.0460783	0.797568
P55002	Mfap2	Microfibrillar-associated protein 2 OS=Mus musculus GN=Mfap2 PE=2 SV=1	647451	502591	609740	305404	586727	405115	375342	468317	487731	411168	-0.804017	0.339856
P55012	Slc12a2	Solute carrier family 12 member 2 OS=Mus musculus GN=Slc12a2 PE=1 SV=2	1.7864e+06	1.51548e+06	2.03354e+06	1.58038e+06	1.52163e+06	1.13639e+06	1.30684e+06	1.24128e+06	1.52512e+06	1.20497e+06	-0.617208	0.0297156
P55050	Fabp2	"Fatty acid-binding protein, intestinal OS=Mus musculus GN=Fabp2 PE=2 SV=2"	72802.3	99997	95442.2	118409	66274.7	23345	24934	23631.8	43934.5	35842.9	-4.20018	0.00353934
P55065	Pltp	Phospholipid transfer protein OS=Mus musculus GN=Pltp PE=1 SV=1	3.19862e+06	3.33937e+06	3.30179e+06	3.29983e+06	3.22852e+06	3.98354e+06	3.85727e+06	3.71238e+06	3.76206e+06	3.88412e+06	0.350202	0.00711456
P55096	Abcd3	ATP-binding cassette sub-family D member 3 OS=Mus musculus GN=Abcd3 PE=1 SV=2	7.81329e+06	8.08596e+06	8.10854e+06	7.90467e+06	7.50071e+06	6.97753e+06	8.31283e+06	7.42099e+06	7.83588e+06	7.457e+06	-0.167813	0.490886
P55194	Sh3bp1	SH3 domain-binding protein 1 OS=Mus musculus GN=Sh3bp1 PE=1 SV=2	551733	568023	592779	641354	555404	531960	505748	486418	511869	510447	-0.250658	0.0357271
P55258	Rab8a	Ras-related protein Rab-8A OS=Mus musculus GN=Rab8a PE=1 SV=2	5.53623e+06	5.83248e+06	4.90389e+06	5.71016e+06	5.1169e+06	6.5567e+06	6.51978e+06	5.60813e+06	5.59941e+06	6.57519e+06	0.366922	0.100372
P55264-2	Adk	Isoform Short of Adenosine kinase OS=Mus musculus GN=Adk	1.09045e+07	9.60816e+06	9.27803e+06	1.08139e+07	8.97036e+06	1.28967e+07	1.38588e+07	1.11365e+07	1.16348e+07	1.11271e+07	0.434289	0.0402707
P55284	Cdh5	Cadherin-5 OS=Mus musculus GN=Cdh5 PE=1 SV=2	2.30608e+06	1.66619e+06	2.05883e+06	1.25976e+06	1.91708e+06	1.59527e+06	1.82987e+06	1.77662e+06	1.95043e+06	1.75869e+06	-0.188264	0.932527
P55288	Cdh11	Cadherin-11 OS=Mus musculus GN=Cdh11 PE=1 SV=1	336284	346516	375652	264099	382398	319091	359979	359327	351063	361340	0.0688502	0.742881
P55302	Lrpap1	Alpha-2-macroglobulin receptor-associated protein OS=Mus musculus GN=Lrpap1 PE=1 SV=1	1.00812e+07	1.04447e+07	1.05816e+07	1.08919e+07	1.10242e+07	9.16515e+06	1.13278e+07	8.59886e+06	9.44668e+06	1.01969e+07	-0.261034	0.233119
P55772	Entpd1	Ectonucleoside triphosphate diphosphohydrolase 1 OS=Mus musculus GN=Entpd1 PE=2 SV=1	1.67077e+06	1.68954e+06	1.67679e+06	1.93806e+06	1.54133e+06	1.43992e+06	1.62339e+06	1.63e+06	1.60948e+06	1.66828e+06	-0.0755238	0.341584
P55821	Stmn2	Stathmin-2 OS=Mus musculus GN=Stmn2 PE=1 SV=1	123116	133501	130214	147932	161436	105096	97376.6	134075	130461	109004	-0.489841	0.0944333
P55937-1	Golga3	Isoform 1 of Golgin subfamily A member 3 OS=Mus musculus GN=Golga3	3.86577e+06	3.54442e+06	3.93449e+06	3.06894e+06	4.09477e+06	4.14809e+06	3.97994e+06	3.90575e+06	3.91147e+06	3.89366e+06	0.0154452	0.332908
P56135	Atp5j2	"ATP synthase subunit f, mitochondrial OS=Mus musculus GN=Atp5j2 PE=1 SV=3"	7.48881e+06	7.98425e+06	8.00776e+06	6.93602e+06	7.76843e+06	7.62758e+06	8.04774e+06	7.85629e+06	7.27716e+06	7.36297e+06	-0.0503584	0.995102
P56183-3	Rrp1	Isoform 2 of Ribosomal RNA processing protein 1 homolog A OS=Mus musculus GN=Rrp1	195208	146500	182158	146790	159133	164629	148048	153471	172605	150503	-0.106569	0.628035
P56198	Cidec	Cell death activator CIDE-3 OS=Mus musculus GN=Cidec PE=1 SV=2	1.98805e+06	1.88745e+06	1.50963e+06	1.95721e+06	1948782	2.93773e+06	2.85759e+06	2.54025e+06	2.39267e+06	2.52182e+06	0.599271	0.00759455
P56212	Arpp19	cAMP-regulated phosphoprotein 19 OS=Mus musculus GN=Arpp19 PE=1 SV=2	492128	527030	553971	594137	539634	483369	845248	449857	543188	509695	-0.155868	0.908784
P56213	Gfer	FAD-linked sulfhydryl oxidase ALR OS=Mus musculus GN=Gfer PE=2 SV=2	2.31734e+06	2.29429e+06	1.87303e+06	2.22843e+06	1.86953e+06	2.56055e+06	2.4094e+06	2.40068e+06	2.36153e+06	2.76307e+06	0.159614	0.0613759
P56371	Rab4a	Ras-related protein Rab-4A OS=Mus musculus GN=Rab4a PE=1 SV=2	580105	476124	561649	442669	437298	435373	490036	436456	504180	451585	-0.125934	0.454152
P56375	Acyp2	Acylphosphatase-2 OS=Mus musculus GN=Acyp2 PE=2 SV=2	3.03313e+06	2.86845e+06	2.99717e+06	3.00931e+06	2.95321e+06	3.82871e+06	4.05473e+06	3.91237e+06	3.40268e+06	3.77869e+06	0.555385	0.0048648
P56376	Acyp1	Acylphosphatase-1 OS=Mus musculus GN=Acyp1 PE=2 SV=2	1.11421e+06	1.34035e+06	1.203e+06	1.94642e+06	1.1562e+06	1.31636e+06	1.48407e+06	1.2766e+06	1.3247e+06	1.2941e+06	0.199816	0.947035
P56379	Mp68	6.8 kDa mitochondrial proteolipid OS=Mus musculus GN=Mp68 PE=2 SV=1	7.01862e+06	7.57091e+06	6.61528e+06	7.8917e+06	6.79705e+06	7.15223e+06	6.81467e+06	6.83625e+06	6.49661e+06	6.91328e+06	-0.0729362	0.430253
P56380	Nudt2	Bis(5'-nucleosyl)-tetraphosphatase [asymmetrical] OS=Mus musculus GN=Nudt2 PE=1 SV=3	2.16587e+06	2.54737e+06	2.18684e+06	3.2538e+06	2.39382e+06	2.50452e+06	2.49299e+06	2.49923e+06	2.2883e+06	2.54754e+06	0.0766481	0.958791
P56382	Atp5e	"ATP synthase subunit epsilon, mitochondrial OS=Mus musculus GN=Atp5e PE=1 SV=2"	770633	926327	949295	711365	792393	684921	646961	753100	762820	676722	-0.352969	0.0957427
P56387	Dynlt3	Dynein light chain Tctex-type 3 OS=Mus musculus GN=Dynlt3 PE=1 SV=1	214104	194700	218305	195607	220758	185471	192264	217299	214411	194819	-0.216897	0.548254
P56389	Cda	Cytidine deaminase OS=Mus musculus GN=Cda PE=1 SV=2	1.82049e+06	1.17878e+06	1.87271e+06	1.21353e+06	784598	957338	1.46299e+06	774494	1.42092e+06	808315	-0.629382	0.41525
P56391	Cox6b1	Cytochrome c oxidase subunit 6B1 OS=Mus musculus GN=Cox6b1 PE=1 SV=2	1.11072e+07	1.34876e+07	1.0189e+07	1.04999e+07	1.23767e+07	1.02642e+07	1.02924e+07	1.11283e+07	9.80022e+06	1.10203e+07	-0.184182	0.280655
P56392	Cox7a1	"Cytochrome c oxidase subunit 7A1, mitochondrial OS=Mus musculus GN=Cox7a1 PE=2 SV=1"	1.02959e+06	964197	909516	905006	1.00517e+06	1.02432e+06	1.1087e+06	1.01182e+06	1.04146e+06	942295	0.142135	0.283874
P56394	Cox17	Cytochrome c oxidase copper chaperone OS=Mus musculus GN=Cox17 PE=3 SV=2	3.51224e+06	4.23125e+06	3.26917e+06	3.86687e+06	4.562e+06	2.42877e+06	2.57018e+06	3.96004e+06	3.54575e+06	2.79801e+06	-0.828669	0.111652
P56395	Cyb5a	Cytochrome b5 OS=Mus musculus GN=Cyb5a PE=1 SV=2	2.44712e+07	2.36969e+07	1.91393e+07	2.71685e+07	2.20472e+07	2.1739e+07	1.92481e+07	2.15204e+07	2.07579e+07	2.23269e+07	-0.203543	0.299601
P56399	Usp5	Ubiquitin carboxyl-terminal hydrolase 5 OS=Mus musculus GN=Usp5 PE=1 SV=1	1.68283e+07	1.82758e+07	1.68977e+07	1.6861e+07	17940809	1.63048e+07	1.7375e+07	1.7357e+07	1.65599e+07	1.8119e+07	0.0369369	0.807873
P56480	Atp5b	"ATP synthase subunit beta, mitochondrial OS=Mus musculus GN=Atp5b PE=1 SV=2"	2.33431e+08	2.33402e+08	2.12595e+08	2.00022e+08	2.04491e+08	2.15557e+08	2.21087e+08	1.89029e+08	194467317	2.13854e+08	0.00940524	0.489604
P56501	Ucp3	Mitochondrial uncoupling protein 3 OS=Mus musculus GN=Ucp3 PE=2 SV=1	370454	824381	462276	1.42645e+06	663263	427392	448811	479847	461395	519244	-0.875456	0.246186
P56528	Cd38	ADP-ribosyl cyclase/cyclic ADP-ribose hydrolase 1 OS=Mus musculus GN=Cd38 PE=1 SV=2	2.2962e+06	2.11691e+06	1.91055e+06	1.90561e+06	1.53233e+06	1.79319e+06	1.91737e+06	1.61224e+06	1.83928e+06	1.78576e+06	-0.174988	0.432424
P56542	Dnase2	Deoxyribonuclease-2-alpha OS=Mus musculus GN=Dnase2 PE=2 SV=1	899504	753927	770969	982988	785537	692294	756250	698840	776345	719238	-0.223887	0.107881
P56546-2	Ctbp2	Isoform 2 of C-terminal-binding protein 2 OS=Mus musculus GN=Ctbp2	1.45535e+06	1.29828e+06	1.42836e+06	1.34466e+06	1.1961e+06	1.24131e+06	1.21643e+06	1.14186e+06	1.16973e+06	1.12717e+06	-0.365684	0.0610332
P56564	Slc1a3	Excitatory amino acid transporter 1 OS=Mus musculus GN=Slc1a3 PE=1 SV=2	1.53434e+06	1.76547e+06	1.35937e+06	1.34516e+06	1.67878e+06	1.60566e+06	1.33604e+06	1.58712e+06	1.49283e+06	1.51445e+06	-0.032454	0.877682
P56565	S100a1	Protein S100-A1 OS=Mus musculus GN=S100a1 PE=1 SV=2	2.6477e+06	2.69385e+06	2.49216e+06	2.67552e+06	2.28544e+06	2.11274e+06	1.88495e+06	2.42622e+06	2.15216e+06	2.26053e+06	-0.464828	0.0513286
P56695	Wfs1	Wolframin OS=Mus musculus GN=Wfs1 PE=1 SV=1	649528	632553	582195	669062	599047	591154	618122	517868	503060	494686	-0.465528	0.0826701
P56812	Pdcd5	Programmed cell death protein 5 OS=Mus musculus GN=Pdcd5 PE=1 SV=3	1.6953e+06	1.67562e+06	1.81256e+06	1.80416e+06	1.75069e+06	1.72658e+06	1.70656e+06	1.71388e+06	1.5656e+06	1.68807e+06	-0.0700836	0.396652
P56959	Fus	RNA-binding protein FUS OS=Mus musculus GN=Fus PE=2 SV=1	7.7835e+06	7.13388e+06	7.72274e+06	7.10657e+06	5.80479e+06	6.89949e+06	6.70413e+06	6.20202e+06	6.8884e+06	6.12039e+06	-0.196247	0.365177
P56960	Exosc10	Exosome component 10 OS=Mus musculus GN=Exosc10 PE=1 SV=2	1.34151e+06	1.18141e+06	1.25728e+06	1.19078e+06	1.24991e+06	1.13087e+06	1.1481e+06	1.14627e+06	1.19347e+06	1.18793e+06	-0.207043	0.165369
P57080	Usp25	Ubiquitin carboxyl-terminal hydrolase 25 OS=Mus musculus GN=Usp25 PE=1 SV=2	780292	703610	817240	554270	781754	790488	772063	765338	778115	772653	-0.0199462	0.450812
P57716	Ncstn	Nicastrin OS=Mus musculus GN=Ncstn PE=1 SV=3	1.23749e+06	1.23652e+06	1.14758e+06	1.21514e+06	1.32173e+06	921645	962545	970048	1.1778e+06	964637	-0.582579	0.0192145
P57722-2	Pcbp3	Isoform 2 of Poly(rC)-binding protein 3 OS=Mus musculus GN=Pcbp3	611906	570043	589630	574210	519256	666381	655491	595638	635016	588581	0.193286	0.135506
P57746	Atp6v1d	V-type proton ATPase subunit D OS=Mus musculus GN=Atp6v1d PE=1 SV=1	1.47731e+06	1.41056e+06	1.43854e+06	1.43216e+06	1.4824e+06	1.60569e+06	1.57789e+06	1.44247e+06	1.3615e+06	1.44684e+06	-0.00338225	0.658366
P57759	Erp29	Endoplasmic reticulum resident protein 29 OS=Mus musculus GN=Erp29 PE=1 SV=2	2.89582e+06	3.06145e+06	3.21517e+06	3.57637e+06	3.0681e+06	3.70699e+06	3.93462e+06	3.91889e+06	3.52806e+06	3.48976e+06	0.416853	0.0371875
P57776-2	Eef1d	Isoform 2 of Elongation factor 1-delta OS=Mus musculus GN=Eef1d	19960.7	17671.4	20301.7	18764.4	15046.5	20036.9	32138.7	36359.4	13565.3	30538.2	1.2333	0.213749
P57776-3	Eef1d	Isoform 3 of Elongation factor 1-delta OS=Mus musculus GN=Eef1d	168625	137260	136090	142450	134903	194149	189928	172840	168053	196876	0.775169	0.0141861
P57780	Actn4	Alpha-actinin-4 OS=Mus musculus GN=Actn4 PE=1 SV=1	5.48585e+07	4.35272e+07	4.52858e+07	2.40937e+07	4.92897e+07	5.61786e+07	6.18995e+07	4.74629e+07	5.40731e+07	5.34796e+07	0.372345	0.192544
P57784	Snrpa1	U2 small nuclear ribonucleoprotein A' OS=Mus musculus GN=Snrpa1 PE=1 SV=2	1.80035e+06	1.67722e+06	1.65091e+06	1.38579e+06	1.52537e+06	1.73555e+06	1.71993e+06	1.61544e+06	1.67656e+06	1.67163e+06	0.027028	0.474253
P58006	Sesn1	Sestrin-1 OS=Mus musculus GN=Sesn1 PE=2 SV=3	165037	171551	161755	150787	203703	136841	155443	180581	181375	177425	0.162805	0.815627
P58021	Tm9sf2	Transmembrane 9 superfamily member 2 OS=Mus musculus GN=Tm9sf2 PE=2 SV=1	1.86693e+06	1.90799e+06	1.92002e+06	2.09621e+06	1.93046e+06	2.15901e+06	2.16216e+06	1.95711e+06	2.01803e+06	1.97606e+06	0.0978643	0.285933
P58044	Idi1	Isopentenyl-diphosphate Delta-isomerase 1 OS=Mus musculus GN=Idi1 PE=2 SV=1	2.32288e+06	2.41566e+06	1.86221e+06	2.21786e+06	2.807e+06	2.16568e+06	2.29846e+06	1.92965e+06	1.84947e+06	1.96541e+06	-0.39016	0.243539
P58058	Nadk	NAD kinase OS=Mus musculus GN=Nadk PE=1 SV=2	1.78355e+06	1.93448e+06	1.60502e+06	1.87139e+06	1.82065e+06	2.05841e+06	1.9561e+06	1.86828e+06	1.78667e+06	1.90974e+06	0.0950457	0.320002
P58064	Mrps6	"28S ribosomal protein S6, mitochondrial OS=Mus musculus GN=Mrps6 PE=2 SV=3"	93979.2	79239.8	90655.8	69094.8	90453.6	123306	143460	105828	106874	112463	0.501726	0.0176507
P58069	Rasa2	Ras GTPase-activating protein 2 OS=Mus musculus GN=Rasa2 PE=1 SV=2	531777	443598	416852	474044	399215	601418	523622	487886	505127	486584	0.292441	0.131127
P58137	Acot8	Acyl-coenzyme A thioesterase 8 OS=Mus musculus GN=Acot8 PE=1 SV=1	489608	545445	480706	602036	494884	568646	574928	499578	524337	539247	0.181875	0.612856
P58158	B3gat3	Galactosylgalactosylxylosylprotein 3-beta-glucuronosyltransferase 3 OS=Mus musculus GN=B3gat3 PE=2 SV=1	399305	376845	415053	397782	390418	402209	409567	428878	420081	386506	0.0568277	0.470961
P58196	Plscr4	Phospholipid scramblase 4 OS=Mus musculus GN=Plscr4 PE=2 SV=2	1.11997e+06	1.04203e+06	1.04641e+06	1.04705e+06	907408	1.09646e+06	1.2893e+06	1.17818e+06	990060	1.28705e+06	0.246775	0.173496
P58242	Smpdl3b	Acid sphingomyelinase-like phosphodiesterase 3b OS=Mus musculus GN=Smpdl3b PE=1 SV=1	937626	873783	1.01848e+06	917306	1.02541e+06	970417	851339	868725	929663	935453	-0.031375	0.457639
P58252	Eef2	Elongation factor 2 OS=Mus musculus GN=Eef2 PE=1 SV=2	1.22091e+08	1.80567e+08	1.89939e+08	1.35996e+08	1.50745e+08	1.77683e+08	2.24037e+08	1.33798e+08	1.36826e+08	1.87651e+08	0.358129	0.590916
P58281-2	Opa1	"Isoform 2 of Dynamin-like 120 kDa protein, mitochondrial OS=Mus musculus GN=Opa1"	1.23888e+07	1.28031e+07	1.11665e+07	1.28766e+07	1.19152e+07	1.24189e+07	1.25865e+07	1.16111e+07	1.18296e+07	1.22241e+07	-0.0320219	0.907043
P58389	Ppp2r4	Serine/threonine-protein phosphatase 2A activator OS=Mus musculus GN=Ppp2r4 PE=1 SV=1	1.1127e+07	1.26125e+07	1.08565e+07	1.43897e+07	1.21328e+07	1.39301e+07	1.41634e+07	1.38714e+07	1.33128e+07	1.48314e+07	0.2997	0.0866622
P58404	Strn4	Isoform 2 of Striatin-4 OS=Mus musculus GN=Strn4	335090	318141	429147	415945	463431	350810	315661	309731	382762	306407	-0.697825	0.184642
P58465	Ctdspl	CTD small phosphatase-like protein OS=Mus musculus GN=Ctdspl PE=2 SV=3	149882	157644	181640	162602	168028	157585	152737	167438	170143	169358	0.025204	0.979088
P58466	Ctdsp1	Carboxy-terminal domain RNA polymerase II polypeptide A small phosphatase 1 OS=Mus musculus GN=Ctdsp1 PE=1 SV=1	340890	351025	340099	399910	271263	423409	354464	347958	345317	354362	0.0828369	0.464554
P58501	Paxbp1	PAX3- and PAX7-binding protein 1 OS=Mus musculus GN=Paxbp1 PE=1 SV=3	63257	51938.3	67648.4	50824.7	70913.6	49848.8	41893.1	57840.9	52269.8	52501.9	-0.43493	0.147425
P58660	Card10	Caspase recruitment domain-containing protein 10 OS=Mus musculus GN=Card10 PE=2 SV=1	41076.5	80628.1	43980.3	22553.6	33019.2	112157	61903.1	113242	103792	80624.8	2.30405	0.0290027
P58681	Tlr7	Toll-like receptor 7 OS=Mus musculus GN=Tlr7 PE=1 SV=1	246671	235284	262599	263207	248454	230785	211583	228082	229025	229449	-0.20193	0.0535567
P58742	Aaas	Aladin OS=Mus musculus GN=Aaas PE=1 SV=1	414920	444702	427397	500658	470613	470805	436211	450772	418824	443012	-0.00865849	0.811797
P58771-2	Tpm1	Isoform 2 of Tropomyosin alpha-1 chain OS=Mus musculus GN=Tpm1	6.28903e+06	4.84738e+06	5.07827e+06	4.62258e+06	4.73853e+06	5.16018e+06	5.05574e+06	4.55099e+06	4.63773e+06	4.56378e+06	-0.106268	0.492657
P58774-2	Tpm2	Isoform 2 of Tropomyosin beta chain OS=Mus musculus GN=Tpm2	1.71292e+07	9.23885e+06	1.05557e+07	9.49176e+06	9.4441e+06	8.64161e+06	1.00306e+07	8.76756e+06	8.22285e+06	8.98298e+06	-0.214242	0.227764
P58801	Ripk2	Receptor-interacting serine/threonine-protein kinase 2 OS=Mus musculus GN=Ripk2 PE=1 SV=1	287031	316462	351366	319404	333202	358160	346376	320803	338227	359725	0.167609	0.253159
P58802	Tbc1d10a	TBC1 domain family member 10A OS=Mus musculus GN=Tbc1d10a PE=2 SV=1	974348	865452	1.01399e+06	976347	1.07777e+06	761390	787960	863325	1.00629e+06	832571	-0.417071	0.105806
P58854	Tubgcp3	Gamma-tubulin complex component 3 OS=Mus musculus GN=Tubgcp3 PE=2 SV=2	1.68272e+06	1.7004e+06	1.87283e+06	1.40595e+06	1.85648e+06	1.79205e+06	1.78164e+06	1.77354e+06	1.79141e+06	1.80393e+06	0.109743	0.476378
P58871	Tnks1bp1	182 kDa tankyrase-1-binding protein OS=Mus musculus GN=Tnks1bp1 PE=1 SV=2	9.54758e+06	8.01459e+06	9.43573e+06	6.23143e+06	9.06686e+06	1.02963e+07	9.65664e+06	1.01866e+07	1.03584e+07	9.81186e+06	0.226454	0.111621
P58929	Gmeb2	Glucocorticoid modulatory element-binding protein 2 OS=Mus musculus GN=Gmeb2 PE=2 SV=2	111032	94209.2	113832	90804.7	115388	80484.7	78853.6	94419.8	96513.2	94195	-0.363802	0.0952105
P59016	Vps33b	Vacuolar protein sorting-associated protein 33B OS=Mus musculus GN=Vps33b PE=1 SV=1	1.40135e+06	1.29065e+06	1.33007e+06	1.27551e+06	1.21836e+06	1.39019e+06	1.39701e+06	1.3628e+06	1.377e+06	1.40241e+06	0.175504	0.18723
P59017	Bcl2l13	Bcl-2-like protein 13 OS=Mus musculus GN=Bcl2l13 PE=1 SV=2	6.0981e+06	6.43491e+06	5.46693e+06	6.01243e+06	6.53621e+06	8.27442e+06	8.2658e+06	7.41768e+06	7.52036e+06	7.80543e+06	0.557945	0.00669078
P59108	Cpne2	Copine-2 OS=Mus musculus GN=Cpne2 PE=2 SV=1	1.99034e+06	1.98284e+06	1.79699e+06	2.45594e+06	1.95934e+06	2.67694e+06	2.78794e+06	2.37972e+06	2.36518e+06	2.40457e+06	0.456499	0.0356686
P59114	Pcif1	Phosphorylated CTD-interacting factor 1 OS=Mus musculus GN=Pcif1 PE=1 SV=1	432314	410577	471661	404161	437787	335911	290381	354090	367630	365851	-0.455011	0.0168172
P59235	Nup43	Nucleoporin Nup43 OS=Mus musculus GN=Nup43 PE=2 SV=2	76959.5	65662.7	73500.5	50653.8	73189	82472.1	76124.5	64874.6	77926.3	67385.6	0.0870267	0.460391
P59242	Cgn	Isoform 2 of Cingulin OS=Mus musculus GN=Cgn	91130.1	67527.2	91902.5	81774.2	80654.9	57973.9	58587.4	66407.8	75930.3	62948.2	-0.679525	0.0384951
P59266	Fitm2	Fat storage-inducing transmembrane protein 2 OS=Mus musculus GN=Fitm2 PE=1 SV=1	1.85259e+06	1.60811e+06	1.45353e+06	1.62717e+06	1.37087e+06	1.97223e+06	1.68342e+06	2.10231e+06	1.59286e+06	1.71602e+06	0.151721	0.188483
P59325	Eif5	Eukaryotic translation initiation factor 5 OS=Mus musculus GN=Eif5 PE=1 SV=1	1.78211e+07	2.05995e+07	1.81668e+07	1.79092e+07	1.77547e+07	1.86176e+07	1.88919e+07	1.89482e+07	1.78901e+07	1.78422e+07	0.0666302	0.991458
P59383	Lrrn4	Leucine-rich repeat neuronal protein 4 OS=Mus musculus GN=Lrrn4 PE=1 SV=2	1.2608e+06	1.75967e+06	1.40075e+06	1.68916e+06	2.0985e+06	1.75139e+06	1.58857e+06	1.83977e+06	1.7212e+06	1.83288e+06	0.0548471	0.546955
P59438	Hps5	Hermansky-Pudlak syndrome 5 protein homolog OS=Mus musculus GN=Hps5 PE=1 SV=2	453507	469447	450344	582338	421555	514182	499313	461390	474004	498441	0.211	0.687708
P59481	Lman2l	VIP36-like protein OS=Mus musculus GN=Lman2l PE=2 SV=1	4.34881e+06	4.63703e+06	4.02977e+06	4.75984e+06	4.38884e+06	4.44166e+06	4.76693e+06	4.5589e+06	4.40272e+06	5.05572e+06	0.0593138	0.437488
P59672-2	Anks1a	Isoform 2 of Ankyrin repeat and SAM domain-containing protein 1A OS=Mus musculus GN=Anks1a	2.03792e+06	1.83797e+06	1.98686e+06	2.13112e+06	2.4323e+06	1.74214e+06	1.76914e+06	2.04488e+06	1.75237e+06	1.91264e+06	-0.336148	0.148301
P59729	Rin3	Ras and Rab interactor 3 OS=Mus musculus GN=Rin3 PE=2 SV=2	534258	607556	598437	616927	664432	529118	462196	561541	586691	493396	-0.315394	0.100993
P59764	Dock4	Dedicator of cytokinesis protein 4 OS=Mus musculus GN=Dock4 PE=1 SV=1	12435.7	14826.5	16870	16282.6	13887.4	15178.5	16246	13649.5	13759.3	12657.7	-0.200927	0.721485
P59808	Sash1	SAM and SH3 domain-containing protein 1 OS=Mus musculus GN=Sash1 PE=1 SV=1	1.93243e+06	1.75528e+06	2.15758e+06	1.89979e+06	1.87825e+06	2.18729e+06	2.04599e+06	1.87963e+06	2.08074e+06	1.88213e+06	0.147996	0.491764
P59913	Pcmtd1	Protein-L-isoaspartate O-methyltransferase domain-containing protein 1 OS=Mus musculus GN=Pcmtd1 PE=2 SV=1	101581	99687.3	85403.2	102058	87080.9	78164.8	86068.2	100374	91632.8	87725.1	-0.29563	0.393582
P59999	Arpc4	Actin-related protein 2/3 complex subunit 4 OS=Mus musculus GN=Arpc4 PE=1 SV=3	9.52663e+06	8.74451e+06	1.04256e+07	9.63225e+06	9.24578e+06	1.01476e+07	1.11994e+07	8.74075e+06	9.7581e+06	9.58546e+06	0.0397964	0.620915
P60060	Sec61g	Protein transport protein Sec61 subunit gamma OS=Mus musculus GN=Sec61g PE=2 SV=1	345219	317194	371278	382564	365022	303401	256957	331553	307397	328831	-0.399208	0.0784533
P60122	Ruvbl1	RuvB-like 1 OS=Mus musculus GN=Ruvbl1 PE=1 SV=1	8.51461e+06	6.947e+06	7.88851e+06	5.1266e+06	6.66752e+06	7.32458e+06	7.07623e+06	6.61963e+06	7.23877e+06	6.76517e+06	0.0443095	0.942118
P60229	Eif3e	Eukaryotic translation initiation factor 3 subunit E OS=Mus musculus GN=Eif3e PE=1 SV=1	4.32186e+06	3.90492e+06	4.28046e+06	2.31835e+06	4.2533e+06	5.08361e+06	5.26438e+06	4.64536e+06	4.66536e+06	4.6938e+06	0.209902	0.115901
P60334	Cdo1	Cysteine dioxygenase type 1 OS=Mus musculus GN=Cdo1 PE=1 SV=1	445880	502547	500079	613295	537554	378663	372188	386439	432484	409295	-0.619391	0.0152204
P60335	Pcbp1	Poly(rC)-binding protein 1 OS=Mus musculus GN=Pcbp1 PE=1 SV=1	6.31974e+06	4.61975e+06	6.10463e+06	4.69301e+06	4.87719e+06	5.34742e+06	5.22898e+06	5.58593e+06	4.42951e+06	5.79355e+06	0.163455	0.979234
P60469	Ppfia3	Liprin-alpha-3 OS=Mus musculus GN=Ppfia3 PE=1 SV=1	313155	241769	248960	222346	236092	334627	294663	276110	246744	284977	0.386285	0.215168
P60521	Gabarapl2	Gamma-aminobutyric acid receptor-associated protein-like 2 OS=Mus musculus GN=Gabarapl2 PE=1 SV=1	165429	246553	152146	229334	187431	228810	173422	224073	246417	260402	0.458504	0.324686
P60603	Romo1	Reactive oxygen species modulator 1 OS=Mus musculus GN=Romo1 PE=2 SV=1	1.13293e+06	1.17088e+06	1.02548e+06	784683	1.14573e+06	835884	718294	876277	870695	876442	-0.573444	0.0732821
P60605	Ube2g2	Ubiquitin-conjugating enzyme E2 G2 OS=Mus musculus GN=Ube2g2 PE=1 SV=1	336520	333985	298594	348681	284872	360518	378773	359035	343272	355028	0.150581	0.0901654
P60670	Nploc4	Nuclear protein localization protein 4 homolog OS=Mus musculus GN=Nploc4 PE=1 SV=3	3.70419e+06	3.80029e+06	3.56085e+06	3.97139e+06	3.69372e+06	4.07953e+06	4.28818e+06	3.88376e+06	4.08358e+06	3.67361e+06	0.19629	0.230018
P60710	Actb	"Actin, cytoplasmic 1 OS=Mus musculus GN=Actb PE=1 SV=1"	2.54538e+08	199232999	2.04319e+08	2.01096e+08	1.8074e+08	2.20358e+08	2.33471e+08	1.93719e+08	2.25679e+08	194652220	0.190608	0.766357
P60762-2	Morf4l1	Isoform 2 of Mortality factor 4-like protein 1 OS=Mus musculus GN=Morf4l1	507235	444581	526257	431121	453914	480075	476442	447077	547296	478782	0.105521	0.714056
P60766	Cdc42	Cell division control protein 42 homolog OS=Mus musculus GN=Cdc42 PE=1 SV=2	1.99873e+07	1.90542e+07	1.52695e+07	1.89446e+07	1.59017e+07	2.33658e+07	2.51924e+07	2.05515e+07	1.92942e+07	2.13074e+07	0.257036	0.0594128
P60824	Cirbp	Cold-inducible RNA-binding protein OS=Mus musculus GN=Cirbp PE=1 SV=1	4.55015e+06	2.67499e+06	4.76397e+06	2.34236e+06	2.47816e+06	2.8273e+06	3.15671e+06	2.37345e+06	3.18166e+06	2.3388e+06	0.133197	0.493025
P60840	Ensa	Isoform 2 of Alpha-endosulfine OS=Mus musculus GN=Ensa	191300	122068	101130	146701	96740.2	233320	155769	167981	124082	172211	0.753792	0.207281
P60843	Eif4a1	Eukaryotic initiation factor 4A-I OS=Mus musculus GN=Eif4a1 PE=1 SV=1	1.87159e+07	1.82863e+07	1.71912e+07	1.80053e+07	1.7102e+07	2.14676e+07	2.17955e+07	1.9486e+07	2.00604e+07	1.95828e+07	0.217909	0.0285863
P60867	Rps20	40S ribosomal protein S20 OS=Mus musculus GN=Rps20 PE=1 SV=1	7.14288e+06	5.43864e+06	8.11429e+06	4.26158e+06	6.44042e+06	6.43775e+06	7.63105e+06	7.11849e+06	7.99969e+06	6.36918e+06	0.19443	0.368304
P60898	Polr2i	DNA-directed RNA polymerase II subunit RPB9 OS=Mus musculus GN=Polr2i PE=2 SV=1	74101.1	4857.96	113262	72569.8	128654	4857.96	71453.4	4857.96	5108.57	4857.96	-5.05255	0.100372
P60904	Dnajc5	DnaJ homolog subfamily C member 5 OS=Mus musculus GN=Dnajc5 PE=1 SV=1	701886	660517	547226	686246	584152	991905	869138	757601	721397	809881	0.475345	0.0307288
P61021	Rab5b	Ras-related protein Rab-5B OS=Mus musculus GN=Rab5b PE=1 SV=1	3.72972e+06	3.77808e+06	3.96452e+06	3.93934e+06	3.95734e+06	3.83359e+06	3.58801e+06	4.04597e+06	3.88493e+06	3.82779e+06	-0.0731121	0.838419
P61022	Chp1	Calcineurin B homologous protein 1 OS=Mus musculus GN=Chp1 PE=1 SV=2	5.57866e+06	6.53122e+06	5.81623e+06	8.04585e+06	6.01493e+06	5.88064e+06	6.01493e+06	6.83915e+06	6.0258e+06	6.01064e+06	-0.020975	0.761364
P61027	Rab10	Ras-related protein Rab-10 OS=Mus musculus GN=Rab10 PE=1 SV=1	4.05032e+06	8.24233e+06	6.91645e+06	7.00038e+06	1.05641e+07	5.10511e+06	7.293e+06	1.05523e+07	3.80147e+06	7.97592e+06	0.0678468	0.831182
P61028	Rab8b	Ras-related protein Rab-8B OS=Mus musculus GN=Rab8b PE=1 SV=1	944757	840978	993706	973809	845364	923443	842471	893564	745830	884845	-0.145386	0.354164
P61079	Ube2d3	Ubiquitin-conjugating enzyme E2 D3 OS=Mus musculus GN=Ube2d3 PE=1 SV=1	1.68242e+06	1.77275e+06	1.69987e+06	2.04179e+06	1.73669e+06	1.90936e+06	1.92508e+06	1.88014e+06	1.83009e+06	1.86937e+06	0.151549	0.34842
P61082	Ube2m	NEDD8-conjugating enzyme Ubc12 OS=Mus musculus GN=Ube2m PE=2 SV=1	3.03525e+06	2.90664e+06	2.856e+06	3.11401e+06	2.79891e+06	3.17497e+06	3.19187e+06	2.99502e+06	3.07956e+06	3.13718e+06	0.177313	0.21082
P61087	Ube2k	Ubiquitin-conjugating enzyme E2 K OS=Mus musculus GN=Ube2k PE=1 SV=3	2.75814e+06	2.78231e+06	2.61259e+06	2.86633e+06	2.74759e+06	3.31722e+06	3.43774e+06	3.05265e+06	2.93358e+06	3.12699e+06	0.279479	0.0307813
P61089	Ube2n	Ubiquitin-conjugating enzyme E2 N OS=Mus musculus GN=Ube2n PE=1 SV=1	8.38956e+06	8.73687e+06	7.67863e+06	9.19883e+06	8.02787e+06	9.63058e+06	1.02203e+07	8.69318e+06	8.40905e+06	9.33165e+06	0.236848	0.183023
P61148	Fgf1	Fibroblast growth factor 1 OS=Mus musculus GN=Fgf1 PE=2 SV=1	2.56412e+06	2.81233e+06	2.7669e+06	2.87678e+06	3.66708e+06	3.48308e+06	3.64399e+06	3.4236e+06	3.23294e+06	3.76105e+06	0.504013	0.0691553
P61161	Actr2	Actin-related protein 2 OS=Mus musculus GN=Actr2 PE=1 SV=1	1.44652e+07	1.31634e+07	1.3832e+07	1.41351e+07	1.33288e+07	1.51059e+07	1.61337e+07	1.28759e+07	1.46239e+07	1.45677e+07	0.114092	0.345674
P61164	Actr1a	Alpha-centractin OS=Mus musculus GN=Actr1a PE=2 SV=1	6.37233e+06	6.95774e+06	6.27587e+06	7.07673e+06	6.6437e+06	6.78003e+06	6.7828e+06	6.91345e+06	6.67077e+06	6.90231e+06	0.0342489	0.640643
P61202	Cops2	Isoform 2 of COP9 signalosome complex subunit 2 OS=Mus musculus GN=Cops2	1.10886e+07	1.13755e+07	1.0409e+07	7.95164e+06	1.11515e+07	1.26279e+07	1.20139e+07	1.13727e+07	1.19585e+07	1.23648e+07	0.180611	0.11825
P61211	Arl1	ADP-ribosylation factor-like protein 1 OS=Mus musculus GN=Arl1 PE=2 SV=1	7.20131e+06	7.76352e+06	6.81034e+06	7.96048e+06	7.22245e+06	8.82153e+06	8.56012e+06	7.68557e+06	7.64138e+06	7.64087e+06	0.113273	0.186958
P61222	Abce1	ATP-binding cassette sub-family E member 1 OS=Mus musculus GN=Abce1 PE=2 SV=1	3.79449e+06	4.13959e+06	4.39171e+06	4.44208e+06	3.91405e+06	4.37218e+06	4.3778e+06	4.13239e+06	4.19262e+06	4.13139e+06	0.0201368	0.641199
P61226	Rap2b	Ras-related protein Rap-2b OS=Mus musculus GN=Rap2b PE=1 SV=1	890773	953255	981894	939503	942439	782590	796831	920026	799103	881153	-0.406967	0.0611112
P61237	Ypel3	Protein yippee-like 3 OS=Mus musculus GN=Ypel3 PE=1 SV=1	128800	128614	128426	129551	125692	129678	127349	128139	124738	133861	-0.0184819	0.929007
P61255	Rpl26	60S ribosomal protein L26 OS=Mus musculus GN=Rpl26 PE=1 SV=1	6.65113e+06	3.00233e+06	6.57387e+06	2.00562e+06	5.42913e+06	7.29998e+06	7.7091e+06	6.6121e+06	7.24964e+06	6.55367e+06	0.589135	0.124721
P61264	Stx1b	Syntaxin-1B OS=Mus musculus GN=Stx1b PE=1 SV=1	211728	188230	230041	200600	194525	144635	138467	178298	171061	157103	-0.626853	0.0163646
P61290	Psme3	Proteasome activator complex subunit 3 OS=Mus musculus GN=Psme3 PE=1 SV=1	1.87484e+06	1.5674e+06	1.57281e+06	1.66639e+06	1.55938e+06	1.48377e+06	1.37215e+06	1.50197e+06	1.56833e+06	1.34407e+06	-0.134644	0.0888927
P61294	Rab6b	Ras-related protein Rab-6B OS=Mus musculus GN=Rab6b PE=1 SV=1	407933	444051	482582	628304	498283	381636	383481	441143	418777	446649	-0.323705	0.148919
P61327	Magoh	Protein mago nashi homolog OS=Mus musculus GN=Magoh PE=2 SV=1	1.28029e+06	1.30376e+06	1.41253e+06	1.06795e+06	1.12452e+06	1.33261e+06	1.28841e+06	1.2775e+06	1.41542e+06	1.14988e+06	0.0145831	0.599344
P61358	Rpl27	60S ribosomal protein L27 OS=Mus musculus GN=Rpl27 PE=1 SV=2	1.09919e+07	2.89525e+06	8.37154e+06	2.33546e+06	7.17203e+06	1.0781e+07	9.19686e+06	8.1364e+06	7.5299e+06	8.86994e+06	0.458063	0.224587
P61458	Pcbd1	Pterin-4-alpha-carbinolamine dehydratase OS=Mus musculus GN=Pcbd1 PE=1 SV=2	1.72741e+06	1.28188e+06	1.68878e+06	1.68556e+06	1.37856e+06	1.63096e+06	1.94058e+06	1.49453e+06	1.56617e+06	1.59933e+06	-0.119124	0.556467
P61514	Rpl37a	60S ribosomal protein L37a OS=Mus musculus GN=Rpl37a PE=2 SV=2	3.36261e+06	1.46099e+06	3.16786e+06	1.1497e+06	3.05849e+06	3.72643e+06	4.36431e+06	3.54263e+06	3.61411e+06	3.5604e+06	0.328848	0.0989982
P61600	Naa20	N-alpha-acetyltransferase 20 OS=Mus musculus GN=Naa20 PE=2 SV=1	454984	367617	353836	482820	465558	348124	311399	503615	427353	277113	-0.606396	0.387563
P61620	Sec61a1	Protein transport protein Sec61 subunit alpha isoform 1 OS=Mus musculus GN=Sec61a1 PE=2 SV=2	2.15281e+06	2.1381e+06	2.68439e+06	2.41581e+06	2.68092e+06	2.38935e+06	2.31042e+06	2.05345e+06	2.49759e+06	2.26346e+06	-0.140047	0.606599
P61750	Arf4	ADP-ribosylation factor 4 OS=Mus musculus GN=Arf4 PE=1 SV=2	1.21142e+07	1.11969e+07	1.15115e+07	1.02839e+07	1.16628e+07	1.50636e+07	1.42275e+07	1.38166e+07	1.41005e+07	1.34614e+07	0.429203	0.00737697
P61759	Vbp1	Prefoldin subunit 3 OS=Mus musculus GN=Vbp1 PE=2 SV=2	4.15053e+06	3.90612e+06	4.01952e+06	3.99532e+06	3.68716e+06	3.81981e+06	3.8352e+06	3.64331e+06	3.66731e+06	3.80174e+06	-0.124835	0.26265
P61793-2	Lpar1	Isoform 2 of Lysophosphatidic acid receptor 1 OS=Mus musculus GN=Lpar1	115635	102059	129594	100257	79644	87680.7	96488.7	81269.5	93269.1	82251.9	-0.358037	0.17181
P61804	Dad1	Dolichyl-diphosphooligosaccharide--protein glycosyltransferase subunit DAD1 OS=Mus musculus GN=Dad1 PE=2 SV=3	4.46012e+06	4.83583e+06	6.32912e+06	5.7674e+06	3.91271e+06	4.48442e+06	2.7783e+06	4.77944e+06	4.15346e+06	4.22996e+06	-0.308906	0.211586
P61922	Abat	"4-aminobutyrate aminotransferase, mitochondrial OS=Mus musculus GN=Abat PE=1 SV=1"	3.99364e+06	3.53632e+06	4.0371e+06	4.58123e+06	3.33634e+06	3.94068e+06	4.39408e+06	3.2725e+06	3.84307e+06	3.38552e+06	-0.0962921	0.766357
P61924	Copz1	Coatomer subunit zeta-1 OS=Mus musculus GN=Copz1 PE=2 SV=1	475835	379123	503358	351083	507946	392614	305862	399697	452770	379701	-0.416763	0.314488
P61939	Serpina7	Thyroxine-binding globulin OS=Mus musculus GN=Serpina7 PE=2 SV=1	1.07724e+06	1.08062e+06	1.34289e+06	1.32438e+06	1.06976e+06	1.40406e+06	1.77158e+06	1.11974e+06	1.11319e+06	1.33434e+06	0.490475	0.353745
P61953	Gng11	Guanine nucleotide-binding protein G(I)/G(S)/G(O) subunit gamma-11 OS=Mus musculus GN=Gng11 PE=1 SV=1	340578	348593	348792	442947	322575	345696	349594	275211	298540	363620	-0.0159631	0.346382
P61957	Sumo2	Small ubiquitin-related modifier 2 OS=Mus musculus GN=Sumo2 PE=1 SV=1	1.29801e+06	1.1304e+06	1.01585e+06	1.25333e+06	977226	1.44721e+06	1.52524e+06	1.19786e+06	1.19695e+06	1.29792e+06	0.322779	0.130167
P61961	Ufm1	Ubiquitin-fold modifier 1 OS=Mus musculus GN=Ufm1 PE=1 SV=1	349992	330167	388436	328726	397661	370557	368619	399186	377852	367687	0.128136	0.434583
P61963	Dcaf7	DDB1- and CUL4-associated factor 7 OS=Mus musculus GN=Dcaf7 PE=2 SV=1	349604	336071	320139	278364	307149	416938	390633	355258	331623	362009	0.277746	0.0778068
P61965	Wdr5	WD repeat-containing protein 5 OS=Mus musculus GN=Wdr5 PE=1 SV=1	847627	737586	750813	630454	615085	848069	812450	742924	800523	754710	0.171798	0.242554
P61967	Ap1s1	AP-1 complex subunit sigma-1A OS=Mus musculus GN=Ap1s1 PE=1 SV=1	715378	655415	874434	730569	944183	756908	639538	869078	719610	712257	-0.0656802	0.644205
P61971	Nutf2	Nuclear transport factor 2 OS=Mus musculus GN=Nutf2 PE=2 SV=1	1.36585e+07	1.14645e+07	1.19408e+07	1.11714e+07	1.17258e+07	1.37802e+07	1.34008e+07	1.22238e+07	1.21213e+07	1.30604e+07	0.228996	0.252984
P61979-2	Hnrnpk	Isoform 2 of Heterogeneous nuclear ribonucleoprotein K OS=Mus musculus GN=Hnrnpk	849747	120987	136742	118362	429699	104576	590488	115419	103175	564142	-0.365085	0.897489
P61979-3	Hnrnpk	Isoform 3 of Heterogeneous nuclear ribonucleoprotein K OS=Mus musculus GN=Hnrnpk	1.63082e+06	1.45582e+06	1.61474e+06	1.20301e+06	1.44981e+06	1.32886e+06	1.44034e+06	1.40383e+06	1.43213e+06	1.46065e+06	-0.0495401	0.680855
P61982	Ywhag	14-3-3 protein gamma OS=Mus musculus GN=Ywhag PE=1 SV=2	2.8816e+07	3.17117e+07	2.46815e+07	2.36605e+07	3.0847e+07	3.44631e+07	3.32114e+07	3.18338e+07	3.05121e+07	3.56807e+07	0.318362	0.0773487
P62046	Lrch1	Leucine-rich repeat and calponin homology domain-containing protein 1 OS=Mus musculus GN=Lrch1 PE=1 SV=2	350516	283389	299382	307174	347292	359352	340562	292651	325386	339135	0.210464	0.581241
P62071	Rras2	Ras-related protein R-Ras2 OS=Mus musculus GN=Rras2 PE=1 SV=1	3.40719e+06	3.3595e+06	3.40966e+06	3.52054e+06	3.42477e+06	3.56664e+06	3.66152e+06	3.60201e+06	3.5883e+06	3.91309e+06	0.107735	0.124721
P62073	Timm10	Mitochondrial import inner membrane translocase subunit Tim10 OS=Mus musculus GN=Timm10 PE=1 SV=1	841471	608077	537130	560677	499015	725271	643439	608320	698780	687456	0.481797	0.377494
P62075	Timm13	Mitochondrial import inner membrane translocase subunit Tim13 OS=Mus musculus GN=Timm13 PE=1 SV=1	2.82661e+06	3.04154e+06	2.81368e+06	2.72879e+06	2.79565e+06	3.07686e+06	3.03728e+06	2.80393e+06	2.72134e+06	2.84624e+06	0.0109845	0.726354
P62077	Timm8b	Mitochondrial import inner membrane translocase subunit Tim8 B OS=Mus musculus GN=Timm8b PE=3 SV=1	545560	724870	568759	568752	594591	600729	585190	550256	564212	542897	-0.0495072	0.523557
P62080	Tspan5	Tetraspanin-5 OS=Mus musculus GN=Tspan5 PE=2 SV=1	168543	148939	129146	154816	123068	175983	183865	188592	160060	187791	0.490442	0.0416304
P62082	Rps7	40S ribosomal protein S7 OS=Mus musculus GN=Rps7 PE=2 SV=1	4.72726e+07	3.81275e+07	3.44041e+07	3.34518e+07	5.28803e+07	6.81909e+07	7.46187e+07	5.67977e+07	5.4564e+07	6.81997e+07	1.38959	0.0156317
P62137	Ppp1ca	Serine/threonine-protein phosphatase PP1-alpha catalytic subunit OS=Mus musculus GN=Ppp1ca PE=1 SV=1	1.72487e+06	1.78702e+06	1.71246e+06	1.82741e+06	1.78334e+06	2.16999e+06	2.2199e+06	1.90769e+06	1.85226e+06	1.99766e+06	0.259045	0.0467711
P62141	Ppp1cb	Serine/threonine-protein phosphatase PP1-beta catalytic subunit OS=Mus musculus GN=Ppp1cb PE=1 SV=3	3.04853e+06	2.69434e+06	3.1422e+06	2.54351e+06	2.94371e+06	2.54744e+06	2.56376e+06	2.5293e+06	2.81851e+06	2.66753e+06	-0.324645	0.196123
P62192	Psmc1	26S protease regulatory subunit 4 OS=Mus musculus GN=Psmc1 PE=1 SV=1	1.09719e+07	9.9929e+06	9.19513e+06	9.99226e+06	9.29107e+06	1.15947e+07	1.08196e+07	1.01199e+07	9.89633e+06	9.65354e+06	0.0190525	0.45274
P62196	Psmc5	26S protease regulatory subunit 8 OS=Mus musculus GN=Psmc5 PE=1 SV=1	1.25596e+07	1.26047e+07	1.22398e+07	1.26926e+07	1.24705e+07	1.4602e+07	1.46303e+07	1.24567e+07	1.26817e+07	1.29598e+07	0.0659503	0.224138
P62204	Calm1	Calmodulin OS=Mus musculus GN=Calm1 PE=1 SV=2	6.33582e+06	6.07766e+06	5.76781e+06	6.65468e+06	5.55444e+06	5.27102e+06	7.4794e+06	5.57849e+06	5.91777e+06	6.03191e+06	-0.0677122	0.934687
P62242	Rps8	40S ribosomal protein S8 OS=Mus musculus GN=Rps8 PE=1 SV=2	1.09685e+07	3.95704e+06	9.84547e+06	2.68538e+06	8.70382e+06	1.05787e+07	1.09625e+07	9.97247e+06	9.73019e+06	9.50455e+06	0.265818	0.201227
P62245	Rps15a	40S ribosomal protein S15a OS=Mus musculus GN=Rps15a PE=1 SV=2	7.05075e+06	5.13666e+06	6.20309e+06	4.7125e+06	7.30614e+06	8.84424e+06	9.39365e+06	8.18506e+06	8.13831e+06	8.57191e+06	0.727712	0.0185546
P62254	Ube2g1	Ubiquitin-conjugating enzyme E2 G1 OS=Mus musculus GN=Ube2g1 PE=2 SV=3	34357.8	31215	33143.1	46157	36853.1	25694.7	32548.4	31701.3	30981.7	29054.2	-0.253547	0.10622
P62257	Ube2h	Ubiquitin-conjugating enzyme E2 H OS=Mus musculus GN=Ube2h PE=2 SV=1	2.11587e+06	1.94534e+06	1.74238e+06	1.39134e+06	1.89334e+06	2.90297e+06	2.90814e+06	2.392e+06	2.298e+06	2.4566e+06	0.578093	0.0176764
P62259	Ywhae	14-3-3 protein epsilon OS=Mus musculus GN=Ywhae PE=1 SV=1	1.3459e+08	1.26276e+08	1.27895e+08	1.13842e+08	1.24286e+08	130916182	1.33809e+08	1.28126e+08	1.30738e+08	1.36293e+08	0.0859502	0.306974
P62264	Rps14	40S ribosomal protein S14 OS=Mus musculus GN=Rps14 PE=2 SV=3	5.48096e+06	4.10349e+06	4.79457e+06	4.10287e+06	5.13261e+06	5.44346e+06	5.66694e+06	5.28468e+06	4.94635e+06	5.32662e+06	0.235253	0.162455
P62267	Rps23	40S ribosomal protein S23 OS=Mus musculus GN=Rps23 PE=1 SV=3	1.27056e+07	5.1797e+06	1.38572e+07	4.63979e+06	1.18681e+07	1.39609e+07	1.4591e+07	1.42768e+07	1.24379e+07	1.28258e+07	0.351459	0.16608
P62270	Rps18	40S ribosomal protein S18 OS=Mus musculus GN=Rps18 PE=1 SV=3	6.82928e+06	4.54454e+06	5.83341e+06	4.38406e+06	5.4909e+06	7.51059e+06	7.37661e+06	5.92108e+06	6.31538e+06	6.3755e+06	0.324012	0.0998844
P62274	Rps29	40S ribosomal protein S29 OS=Mus musculus GN=Rps29 PE=2 SV=2	2.33357e+06	1.74814e+06	2.31671e+06	1.29686e+06	1.93494e+06	2.57171e+06	2.61813e+06	2.55886e+06	2.07556e+06	2.43121e+06	0.584994	0.111094
P62281	Rps11	40S ribosomal protein S11 OS=Mus musculus GN=Rps11 PE=1 SV=3	7.56017e+06	3.69785e+06	7.06717e+06	3.42558e+06	6.44368e+06	8.35384e+06	8.22415e+06	7.49106e+06	7.4288e+06	7.22713e+06	0.301257	0.116431
P62301	Rps13	40S ribosomal protein S13 OS=Mus musculus GN=Rps13 PE=1 SV=2	7.81519e+06	2.26704e+06	8.53621e+06	1.11249e+06	6.97565e+06	7.77571e+06	7.84019e+06	7.56693e+06	6.61017e+06	6.90267e+06	0.147195	0.277026
P62305	Snrpe	Small nuclear ribonucleoprotein E OS=Mus musculus GN=Snrpe PE=2 SV=1	2.9167e+06	2.37372e+06	2.65323e+06	1.69896e+06	2.43816e+06	2.42881e+06	2.25076e+06	2.1067e+06	2.55721e+06	2.12698e+06	-0.193856	0.785762
P62307	Snrpf	Small nuclear ribonucleoprotein F OS=Mus musculus GN=Snrpf PE=2 SV=1	386463	282783	358584	251973	307703	317047	316689	295542	336668	287350	0.0542302	0.931007
P62309	Snrpg	Small nuclear ribonucleoprotein G OS=Mus musculus GN=Snrpg PE=1 SV=1	103771	110780	164834	114007	134367	56483.1	62928.3	86950.5	86765.9	70279.1	-1.2862	0.0120113
P62311	Lsm3	U6 snRNA-associated Sm-like protein LSm3 OS=Mus musculus GN=Lsm3 PE=3 SV=2	1.44884e+06	1.20395e+06	1.50208e+06	1.13152e+06	1.28298e+06	940326	954800	1.27515e+06	1.39472e+06	1.15812e+06	-0.243211	0.260127
P62315	Snrpd1	Small nuclear ribonucleoprotein Sm D1 OS=Mus musculus GN=Snrpd1 PE=2 SV=1	412275	383325	362253	312373	349119	503259	481279	414098	415693	370437	0.29652	0.0905135
P62317	Snrpd2	Small nuclear ribonucleoprotein Sm D2 OS=Mus musculus GN=Snrpd2 PE=2 SV=1	3.39374e+06	2.8874e+06	3.49485e+06	2.25583e+06	2.95922e+06	3.11675e+06	2.91122e+06	2.83881e+06	2.98285e+06	2.64318e+06	-0.0491251	0.847277
P62320	Snrpd3	Small nuclear ribonucleoprotein Sm D3 OS=Mus musculus GN=Snrpd3 PE=1 SV=1	5.36738e+06	4.93333e+06	5.29506e+06	3.34223e+06	4.29536e+06	4.95865e+06	5.1806e+06	4.14714e+06	4.88112e+06	4.35438e+06	-0.0364818	0.870968
P62331	Arf6	ADP-ribosylation factor 6 OS=Mus musculus GN=Arf6 PE=1 SV=2	4.4043e+06	4.04559e+06	3.97277e+06	4.50126e+06	3.4148e+06	4.8907e+06	4.75965e+06	4.42401e+06	4.51825e+06	4.53912e+06	0.268834	0.0999874
P62334	Psmc6	26S protease regulatory subunit 10B OS=Mus musculus GN=Psmc6 PE=1 SV=1	1.05426e+07	1.06703e+07	1.06087e+07	1.10229e+07	1.07198e+07	1.00074e+07	1.02014e+07	1.08146e+07	1.14092e+07	9.75947e+06	-0.104546	0.599623
P62342	Selt	Selenoprotein T OS=Mus musculus GN=Selt PE=2 SV=2	384851	390974	374261	590386	305480	421120	323197	378859	311785	327268	-0.251469	0.41525
P62482	Kcnab2	Voltage-gated potassium channel subunit beta-2 OS=Mus musculus GN=Kcnab2 PE=2 SV=1	274552	309453	326027	411414	249869	305322	308418	258140	277091	295793	-0.104279	0.566717
P62488	Polr2g	DNA-directed RNA polymerase II subunit RPB7 OS=Mus musculus GN=Polr2g PE=2 SV=1	220740	184637	208874	156892	175237	213621	212866	201392	218534	186272	0.335544	0.323902
P62500-3	Tsc22d1	Isoform 2 of TSC22 domain family protein 1 OS=Mus musculus GN=Tsc22d1	220371	206678	205960	309478	178658	246527	266251	208428	219093	204929	0.12749	0.823135
P62627	Dynlrb1	Dynein light chain roadblock-type 1 OS=Mus musculus GN=Dynlrb1 PE=1 SV=3	7.30548e+06	7.45906e+06	7.21166e+06	8.3052e+06	7.75811e+06	8.63371e+06	8.43789e+06	8.75156e+06	8.04502e+06	8.50128e+06	0.302768	0.0587521
P62702	Rps4x	"40S ribosomal protein S4, X isoform OS=Mus musculus GN=Rps4x PE=2 SV=2"	9.99791e+06	4.47703e+06	9.64408e+06	3.6317e+06	9.00808e+06	8.75974e+06	9.20269e+06	9.08798e+06	9.41003e+06	8.72581e+06	-0.00150899	0.302509
P62715	Ppp2cb	Serine/threonine-protein phosphatase 2A catalytic subunit beta isoform OS=Mus musculus GN=Ppp2cb PE=1 SV=1	688330	637916	676325	661732	707008	663920	664346	752480	696667	728494	0.0524411	0.463337
P62717	Rpl18a	60S ribosomal protein L18a OS=Mus musculus GN=Rpl18a PE=1 SV=1	5.26335e+06	2.21774e+06	4.52235e+06	2.15023e+06	4.54509e+06	4.49795e+06	5.17141e+06	4.82378e+06	4.59835e+06	5.22728e+06	0.125576	0.202772
P62737	Acta2	"Actin, aortic smooth muscle OS=Mus musculus GN=Acta2 PE=1 SV=1"	171277	84085.6	118839	80110.2	119823	74653.6	96778.2	93494.5	85091.2	82496.4	-0.763943	0.202772
P62743	Ap2s1	AP-2 complex subunit sigma OS=Mus musculus GN=Ap2s1 PE=1 SV=1	3.4018e+06	3.08119e+06	3.34135e+06	3.29222e+06	3.42805e+06	3.2723e+06	3.15068e+06	3.10052e+06	3.13268e+06	3.11341e+06	-0.157247	0.285798
P62746	Rhob	Rho-related GTP-binding protein RhoB OS=Mus musculus GN=Rhob PE=1 SV=1	306635	325416	310682	355675	296338	338920	343640	297485	285370	351404	0.195835	0.886591
P62748	Hpcal1	Hippocalcin-like protein 1 OS=Mus musculus GN=Hpcal1 PE=2 SV=2	3.39807e+06	3.38002e+06	3.23525e+06	3.41919e+06	2.84954e+06	3.34434e+06	3.57261e+06	3.33671e+06	3.58603e+06	3.36383e+06	-0.0099858	0.345704
P62751	Rpl23a	60S ribosomal protein L23a OS=Mus musculus GN=Rpl23a PE=1 SV=1	9.5852e+06	4.10959e+06	8.20486e+06	2.78278e+06	7.17811e+06	1.06905e+07	1.04094e+07	9.02438e+06	8.9162e+06	9.32502e+06	0.571014	0.112694
P62754	Rps6	40S ribosomal protein S6 OS=Mus musculus GN=Rps6 PE=1 SV=1	8.39511e+06	4.07385e+06	9.1782e+06	3.80665e+06	8.45559e+06	9.47811e+06	9.76168e+06	8.43085e+06	9.08389e+06	9.01575e+06	0.157824	0.163253
P62774	Mtpn	Myotrophin OS=Mus musculus GN=Mtpn PE=1 SV=2	3.65969e+06	3.76117e+06	3.87905e+06	4.35457e+06	3.62606e+06	4.56818e+06	4.56037e+06	4.22045e+06	4.2097e+06	4.24617e+06	0.284448	0.0625145
P62806	Hist1h4a	Histone H4 OS=Mus musculus GN=Hist1h4a PE=1 SV=2	3.77118e+07	6.85202e+06	1.61939e+07	8.61322e+06	9.52555e+06	9.67974e+06	1.13426e+07	1.94212e+07	3.62229e+07	6.92392e+06	0.412231	0.885546
P62814	Atp6v1b2	"V-type proton ATPase subunit B, brain isoform OS=Mus musculus GN=Atp6v1b2 PE=1 SV=1"	1.57732e+07	1.67616e+07	1.64552e+07	2.10632e+07	1.6625e+07	1.67325e+07	1.79473e+07	1.65955e+07	1.71533e+07	1.59756e+07	6.45e-05	0.796822
P62821	Rab1A	Ras-related protein Rab-1A OS=Mus musculus GN=Rab1A PE=1 SV=3	8.84695e+06	1.06106e+07	9.53885e+06	1.16314e+07	1.01129e+07	1.02142e+07	1.18955e+07	1.01706e+07	9.99817e+06	1.087e+07	0.00801685	0.551737
P62827	Ran	GTP-binding nuclear protein Ran OS=Mus musculus GN=Ran PE=1 SV=3	1.59036e+07	1.51623e+07	1.33177e+07	1.60397e+07	1.21909e+07	1.83982e+07	2.03835e+07	1.35618e+07	1.69701e+07	1.59334e+07	0.240138	0.193798
P62830	Rpl23	60S ribosomal protein L23 OS=Mus musculus GN=Rpl23 PE=1 SV=1	4.57427e+06	4.56361e+06	4.79147e+06	4.61804e+06	5.12138e+06	3.78157e+06	4.40556e+06	4.50904e+06	4.90283e+06	4.22949e+06	-0.145371	0.242196
P62835	Rap1a	Ras-related protein Rap-1A OS=Mus musculus GN=Rap1a PE=2 SV=1	9.03552e+06	7.92922e+06	5.96703e+06	8.15878e+06	6.38757e+06	9.70741e+06	9.42955e+06	9.21127e+06	7.88975e+06	9.27089e+06	0.356666	0.100426
P62843	Rps15	40S ribosomal protein S15 OS=Mus musculus GN=Rps15 PE=2 SV=2	737243	455755	686646	431448	511250	843135	949829	716827	852608	711878	1.08688	0.0406839
P62849-2	Rps24	Isoform 2 of 40S ribosomal protein S24 OS=Mus musculus GN=Rps24	4.73973e+06	1.81885e+06	4.1921e+06	1.2443e+06	4.33817e+06	5.06668e+06	4.95581e+06	4.18499e+06	4.49956e+06	4.19906e+06	0.135095	0.201611
P62852	Rps25	40S ribosomal protein S25 OS=Mus musculus GN=Rps25 PE=1 SV=1	5.06796e+06	4.24899e+06	5.69063e+06	4.20652e+06	5.28656e+06	5.26191e+06	5.27989e+06	5.47584e+06	4.94126e+06	5.1515e+06	0.0864632	0.425427
P62855	Rps26	40S ribosomal protein S26 OS=Mus musculus GN=Rps26 PE=2 SV=3	5.37178e+06	2.23616e+06	4.4089e+06	1.49226e+06	4.32534e+06	5.69189e+06	6.86705e+06	4.64281e+06	4.44865e+06	4.7656e+06	0.2057	0.15882
P62858	Rps28	40S ribosomal protein S28 OS=Mus musculus GN=Rps28 PE=2 SV=1	2.29178e+06	2.25329e+06	3.49092e+06	1.69467e+06	2.85839e+06	2.67036e+06	3.17896e+06	3.04872e+06	3.19291e+06	2.89778e+06	0.627766	0.231641
P62862	Fau	40S ribosomal protein S30 OS=Mus musculus GN=Fau PE=1 SV=1	472537	315281	518892	222999	589592	641545	577289	623713	550848	561954	0.449948	0.118319
P62869	Tceb2	Transcription elongation factor B polypeptide 2 OS=Mus musculus GN=Tceb2 PE=1 SV=1	4.1512e+06	4.11206e+06	3.90523e+06	4.08399e+06	4.0544e+06	5.09871e+06	5.04985e+06	4.92641e+06	4.9909e+06	4.89628e+06	0.432975	0.00295584
P62874	Gnb1	Guanine nucleotide-binding protein G(I)/G(S)/G(T) subunit beta-1 OS=Mus musculus GN=Gnb1 PE=1 SV=3	2.48615e+07	1.67963e+07	1.67193e+07	1.76911e+07	2.08895e+07	1.68963e+07	2.11076e+07	1.85748e+07	1.76731e+07	2.41833e+07	0.0532197	0.904022
P62880	Gnb2	Guanine nucleotide-binding protein G(I)/G(S)/G(T) subunit beta-2 OS=Mus musculus GN=Gnb2 PE=1 SV=3	5.10469e+06	4.64619e+06	4.46564e+06	4.66106e+06	4.56908e+06	3.33571e+06	3.71469e+06	4.69329e+06	4.07196e+06	3.98577e+06	-0.35382	0.0656559
P62881-2	Gnb5	Isoform 2 of Guanine nucleotide-binding protein subunit beta-5 OS=Mus musculus GN=Gnb5	180715	198613	219040	270139	207765	166806	182746	190402	191900	185155	-0.281433	0.13963
P62889	Rpl30	60S ribosomal protein L30 OS=Mus musculus GN=Rpl30 PE=2 SV=2	6.98503e+06	3.81403e+06	6.70766e+06	3.22592e+06	6.15683e+06	7.30458e+06	7.32608e+06	6.63927e+06	6.83493e+06	6.61022e+06	0.199151	0.164777
P62897	Cycs	"Cytochrome c, somatic OS=Mus musculus GN=Cycs PE=1 SV=2"	1.10079e+07	1.43341e+07	1.09137e+07	1.13201e+07	1.37469e+07	1.26727e+07	1.28503e+07	1.28406e+07	1.22161e+07	1.1869e+07	0.254785	0.788775
P62900	Rpl31	60S ribosomal protein L31 OS=Mus musculus GN=Rpl31 PE=1 SV=1	6.14757e+06	2.64834e+06	6.42746e+06	3.77236e+06	4.54767e+06	8.12356e+06	7.90251e+06	6.76423e+06	6.66394e+06	7.54543e+06	0.90753	0.0488859
P62908	Rps3	40S ribosomal protein S3 OS=Mus musculus GN=Rps3 PE=1 SV=1	2.64364e+07	2.13667e+07	2.83798e+07	1.64738e+07	2.80008e+07	2.71981e+07	2.91963e+07	2.64782e+07	2.66701e+07	2.56828e+07	0.00577447	0.346559
P62911	Rpl32	60S ribosomal protein L32 OS=Mus musculus GN=Rpl32 PE=1 SV=2	5.28954e+06	1.41005e+06	4.20201e+06	1.1633e+06	3.84567e+06	5.36409e+06	5.79002e+06	4.80078e+06	5.01494e+06	4.56442e+06	0.535372	0.131384
P62915	Gtf2b	Transcription initiation factor IIB OS=Mus musculus GN=Gtf2b PE=1 SV=1	168317	138061	172608	157020	164071	105877	126376	139611	150656	128948	-0.558343	0.0573791
P62918	Rpl8	60S ribosomal protein L8 OS=Mus musculus GN=Rpl8 PE=2 SV=2	1.63125e+07	6.24067e+06	1.54248e+07	5.52163e+06	1.27868e+07	1.76776e+07	1.82216e+07	1.63253e+07	1.70406e+07	1.49769e+07	0.585321	0.11739
P62960	Ybx1	Nuclease-sensitive element-binding protein 1 OS=Mus musculus GN=Ybx1 PE=1 SV=3	444762	378558	491834	282166	472255	466635	532158	445527	512339	476680	0.157199	0.213098
P62962	Pfn1	Profilin-1 OS=Mus musculus GN=Pfn1 PE=1 SV=2	2.73403e+07	2.97742e+07	2.91034e+07	3.17215e+07	2.70236e+07	3.47744e+07	3.61475e+07	3.00469e+07	3.17475e+07	3.4389e+07	0.372208	0.0594589
P62983	Rps27a	Ubiquitin-40S ribosomal protein S27a OS=Mus musculus GN=Rps27a PE=1 SV=2	1.50648e+07	1.44797e+07	1.25434e+07	1.47642e+07	1.42069e+07	1.41242e+07	1.42424e+07	1.35436e+07	1.33968e+07	1.28657e+07	-0.161716	0.500328
P62996	Tra2b	Transformer-2 protein homolog beta OS=Mus musculus GN=Tra2b PE=2 SV=1	1.49089e+06	988619	1.61123e+06	794051	1.4787e+06	1.16247e+06	1.15223e+06	1.20591e+06	1.26184e+06	1.15971e+06	-0.52341	0.870968
P63001	Rac1	Ras-related C3 botulinum toxin substrate 1 OS=Mus musculus GN=Rac1 PE=1 SV=1	5.69153e+06	6.81922e+06	5.8745e+06	7.29366e+06	6.04616e+06	6.91965e+06	7.06408e+06	6.85525e+06	6.65545e+06	7.12754e+06	0.293021	0.210626
P63005	Pafah1b1	Platelet-activating factor acetylhydrolase IB subunit alpha OS=Mus musculus GN=Pafah1b1 PE=1 SV=2	1.05515e+07	1.10031e+07	9.87294e+06	1.08415e+07	1.11096e+07	1.07122e+07	1.08815e+07	1.05581e+07	1.06916e+07	1.06717e+07	-0.068508	0.949641
P63017	Hspa8	Heat shock cognate 71 kDa protein OS=Mus musculus GN=Hspa8 PE=1 SV=1	5.3169e+07	6.1262e+07	5.16729e+07	6.1065e+07	5.50781e+07	7.33519e+07	7.54467e+07	5.95895e+07	6.78832e+07	7.16298e+07	0.573898	0.0288548
P63024	Vamp3	Vesicle-associated membrane protein 3 OS=Mus musculus GN=Vamp3 PE=1 SV=1	877769	879989	924554	959685	1.01709e+06	666208	797862	862329	833231	802968	-0.320389	0.0565354
P63028	Tpt1	Translationally-controlled tumor protein OS=Mus musculus GN=Tpt1 PE=1 SV=1	1.35178e+07	1.03604e+07	9.33038e+06	1.08038e+07	8.98963e+06	1.51946e+07	1.34108e+07	1.18242e+07	1.34385e+07	1.16935e+07	0.530444	0.0842895
P63030	Mpc1	Mitochondrial pyruvate carrier 1 OS=Mus musculus GN=Mpc1 PE=1 SV=1	1.41932e+06	1.40858e+06	1.33534e+06	992826	1.41708e+06	1.44846e+06	1.45162e+06	1.48919e+06	1.30636e+06	1.23889e+06	0.0681066	0.578775
P63037	Dnaja1	DnaJ homolog subfamily A member 1 OS=Mus musculus GN=Dnaja1 PE=1 SV=1	5.59388e+06	5.12716e+06	4.87574e+06	3.77481e+06	5.62376e+06	6.38103e+06	6.67803e+06	5.63284e+06	5.73065e+06	6.06868e+06	0.387778	0.0804691
P63038	Hspd1	"60 kDa heat shock protein, mitochondrial OS=Mus musculus GN=Hspd1 PE=1 SV=1"	8.25103e+07	1.11783e+08	8.76047e+07	9.41274e+07	1.01251e+08	9.29349e+07	9.58886e+07	8.74365e+07	8.82831e+07	9.71656e+07	-0.0589834	0.744673
P63044	Vamp2	Vesicle-associated membrane protein 2 OS=Mus musculus GN=Vamp2 PE=1 SV=2	200201	180442	242694	230782	210807	142514	145254	172823	182236	158458	-0.678813	0.0209259
P63073	Eif4e	Eukaryotic translation initiation factor 4E OS=Mus musculus GN=Eif4e PE=1 SV=1	3.10538e+06	3.50367e+06	3.42776e+06	3.76151e+06	3.82097e+06	3.63274e+06	3.94918e+06	4.0379e+06	3.60508e+06	3.65196e+06	0.0962544	0.292192
P63082	Atp6v0c	V-type proton ATPase 16 kDa proteolipid subunit OS=Mus musculus GN=Atp6v0c PE=2 SV=1	236871	258767	258090	291960	228721	345553	325120	288153	252897	273345	0.23577	0.14163
P63085	Mapk1	Mitogen-activated protein kinase 1 OS=Mus musculus GN=Mapk1 PE=1 SV=3	1.46357e+07	1.38516e+07	1.42482e+07	1.39333e+07	1.34419e+07	1.49785e+07	1.57932e+07	1.40104e+07	1.39022e+07	1.52301e+07	0.11333	0.304069
P63087-2	Ppp1cc	Isoform Gamma-2 of Serine/threonine-protein phosphatase PP1-gamma catalytic subunit OS=Mus musculus GN=Ppp1cc	297907	328929	350454	346250	333079	325815	341067	306452	301098	324984	-0.0665617	0.560373
P63094	Gnas	Guanine nucleotide-binding protein G(s) subunit alpha isoforms short OS=Mus musculus GN=Gnas PE=1 SV=1	1.39402e+07	1.22563e+07	1.18279e+07	1.28702e+07	1.16006e+07	1.14038e+07	1.15968e+07	1.29954e+07	1.39461e+07	1.24816e+07	0.0425818	0.985147
P63101	Ywhaz	14-3-3 protein zeta/delta OS=Mus musculus GN=Ywhaz PE=1 SV=1	2.41047e+07	2.07552e+07	1.78709e+07	1.9395e+07	1.62463e+07	2.59794e+07	2.72524e+07	2.05538e+07	2.17288e+07	2.31353e+07	0.408966	0.116746
P63115	Slc7a10	Asc-type amino acid transporter 1 OS=Mus musculus GN=Slc7a10 PE=1 SV=1	223948	386159	324434	314239	414253	289221	304632	315394	301390	302980	-0.162034	0.619371
P63154	Crnkl1	Crooked neck-like protein 1 OS=Mus musculus GN=Crnkl1 PE=1 SV=1	294618	259121	282130	262825	414692	375253	276093	270130	280420	359158	-0.0271373	0.818734
P63158	Hmgb1	High mobility group protein B1 OS=Mus musculus GN=Hmgb1 PE=1 SV=2	1.25433e+07	1.68382e+07	1.26957e+07	1.73281e+07	1.25621e+07	1.5032e+07	1.58608e+07	1.2919e+07	1.3311e+07	1.46686e+07	0.323542	0.966362
P63163	Snrpb	Small nuclear ribonucleoprotein-associated protein B OS=Mus musculus GN=Snrpb PE=1 SV=1	2.03791e+06	1.80511e+06	2.07441e+06	1.79573e+06	2.28758e+06	2.03485e+06	1.68131e+06	1.68367e+06	1.72243e+06	1.75595e+06	-0.382605	0.168076
P63166	Sumo1	Small ubiquitin-related modifier 1 OS=Mus musculus GN=Sumo1 PE=1 SV=1	2.26233e+06	1.33272e+06	1.81109e+06	1.57774e+06	1.62439e+06	1.66823e+06	1.91803e+06	1.58216e+06	1.58024e+06	1.71276e+06	0.0456274	0.978203
P63168	Dynll1	"Dynein light chain 1, cytoplasmic OS=Mus musculus GN=Dynll1 PE=1 SV=1"	688742	810277	606815	638037	968711	896909	1.58025e+06	948951	1.01843e+06	822816	0.738163	0.0933428
P63213	Gng2	Guanine nucleotide-binding protein G(I)/G(S)/G(O) subunit gamma-2 OS=Mus musculus GN=Gng2 PE=2 SV=2	1.03734e+06	740502	897483	1.04211e+06	672182	737245	865142	870773	916233	722106	-0.0766686	0.695721
P63242	Eif5a	Eukaryotic translation initiation factor 5A-1 OS=Mus musculus GN=Eif5a PE=1 SV=2	8.15443e+06	7.29679e+06	6.7241e+06	8.18986e+06	6.3043e+06	9.00431e+06	8.44907e+06	7.95064e+06	7.36242e+06	8.08349e+06	0.237818	0.209312
P63254	Crip1	Cysteine-rich protein 1 OS=Mus musculus GN=Crip1 PE=1 SV=2	1.57752e+07	1.82056e+07	2.15222e+07	2.61976e+07	2.1532e+07	1.9939e+07	2.42323e+07	2.16328e+07	2.09548e+07	2.60534e+07	-0.00250538	0.45833
P63276	Rps17	40S ribosomal protein S17 OS=Mus musculus GN=Rps17 PE=1 SV=2	1.27254e+07	7.53936e+06	1.18128e+07	4.8687e+06	1.01093e+07	13513644	1.50975e+07	1.2954e+07	1.21802e+07	1.31005e+07	0.567069	0.103319
P63280	Ube2i	SUMO-conjugating enzyme UBC9 OS=Mus musculus GN=Ube2i PE=1 SV=1	3.44608e+06	3.99515e+06	4.4306e+06	5.83021e+06	4.35811e+06	5.74091e+06	7.38527e+06	4.61456e+06	5.88438e+06	6.23419e+06	0.76512	0.0676361
P63300	Sepw1	Selenoprotein W OS=Mus musculus GN=Sepw1 PE=1 SV=3	110128	112274	109535	106528	100401	148586	139005	140645	128852	141322	0.544186	0.00353934
P63321	Rala	Ras-related protein Ral-A OS=Mus musculus GN=Rala PE=1 SV=1	1.80563e+06	1.72798e+06	1.61597e+06	1.8143e+06	1.62084e+06	2.04173e+06	2.12688e+06	1.89718e+06	1.84186e+06	2.04436e+06	0.386752	0.0341182
P63323	Rps12	40S ribosomal protein S12 OS=Mus musculus GN=Rps12 PE=1 SV=2	3.96168e+06	3.98127e+06	3.74809e+06	3.48923e+06	3.3498e+06	4.28326e+06	4.43368e+06	3.9347e+06	3.7675e+06	3.91369e+06	0.0935092	0.185434
P63325	Rps10	40S ribosomal protein S10 OS=Mus musculus GN=Rps10 PE=1 SV=1	3.08816e+07	2.30397e+07	3.0954e+07	1.86585e+07	2.79129e+07	3.2279e+07	3.38324e+07	2.8795e+07	2.91529e+07	2.886e+07	0.0711951	0.229925
P63328	Ppp3ca	Isoform 2 of Serine/threonine-protein phosphatase 2B catalytic subunit alpha isoform OS=Mus musculus GN=Ppp3ca	3.91506e+06	4.23911e+06	3.6616e+06	4.32551e+06	3.2677e+06	4.86165e+06	5.01051e+06	3.88376e+06	3.97656e+06	4.39507e+06	0.258435	0.198991
P63330	Ppp2ca	Serine/threonine-protein phosphatase 2A catalytic subunit alpha isoform OS=Mus musculus GN=Ppp2ca PE=1 SV=1	287272	349599	300838	266907	295892	375490	363842	338270	381081	355719	0.456931	0.027766
P67778	Phb	Prohibitin OS=Mus musculus GN=Phb PE=1 SV=1	3.27096e+07	3.73897e+07	3.59137e+07	3.63174e+07	3.91773e+07	2.52368e+07	2.49285e+07	2.8244e+07	2.71373e+07	2.79687e+07	-0.716489	0.00353934
P67871	Csnk2b	Casein kinase II subunit beta OS=Mus musculus GN=Csnk2b PE=1 SV=1	1.11167e+06	946481	1.11421e+06	670157	1.10109e+06	1.01831e+06	1.06882e+06	1.08721e+06	1.05634e+06	1.01324e+06	-0.110431	0.570564
P67984	Rpl22	60S ribosomal protein L22 OS=Mus musculus GN=Rpl22 PE=1 SV=2	3.13006e+06	2.59415e+06	3.47978e+06	2.42305e+06	3.63795e+06	3.38787e+06	4.01835e+06	3.39838e+06	3.5789e+06	3.64006e+06	0.278815	0.144076
P68037	Ube2l3	Ubiquitin-conjugating enzyme E2 L3 OS=Mus musculus GN=Ube2l3 PE=2 SV=1	2.06806e+07	2.091e+07	1.79865e+07	2.38813e+07	1.83475e+07	3.17357e+07	3.30812e+07	2.34853e+07	2.30177e+07	2.66205e+07	0.571357	0.0382775
P68040	Gnb2l1	Guanine nucleotide-binding protein subunit beta-2-like 1 OS=Mus musculus GN=Gnb2l1 PE=1 SV=3	2.08159e+07	2.08538e+07	1.81558e+07	1.95855e+07	1.88874e+07	2.00757e+07	2.15584e+07	2.08395e+07	1.95098e+07	1.88673e+07	0.0298262	0.663222
P68181-4	Prkacb	Isoform 4 of cAMP-dependent protein kinase catalytic subunit beta OS=Mus musculus GN=Prkacb	80839.4	76108.1	96132.8	105677	92824.2	60559.6	63387.4	65974.2	66602	60551.6	-0.904006	0.00759455
P68181	Prkacb	cAMP-dependent protein kinase catalytic subunit beta OS=Mus musculus GN=Prkacb PE=1 SV=2	163742	226818	153468	215911	150765	310962	355230	270188	306421	329193	1.58506	0.00582895
P68254	Ywhaq	14-3-3 protein theta OS=Mus musculus GN=Ywhaq PE=1 SV=1	2.28774e+07	2.32056e+07	2.01056e+07	1.92016e+07	22899376	3.33299e+07	3.25138e+07	2.84633e+07	2.7955e+07	3.25187e+07	0.782278	0.0048648
P68368	Tuba4a	Tubulin alpha-4A chain OS=Mus musculus GN=Tuba4a PE=1 SV=1	1.53711e+06	1.13804e+06	1.77619e+06	795625	1.19198e+06	957419	1.11038e+06	973919	1.22387e+06	996914	-0.44281	0.379747
P68372	Tubb4b	Tubulin beta-4B chain OS=Mus musculus GN=Tubb4b PE=1 SV=1	1.48419e+06	1.05028e+06	1.16129e+06	686199	1.01539e+06	1.37917e+06	1.40179e+06	1.30455e+06	1.43952e+06	1.33458e+06	0.637271	0.123771
P68373	Tuba1c	Tubulin alpha-1C chain OS=Mus musculus GN=Tuba1c PE=1 SV=1	11253.9	10123	8207.3	12427.8	11095.1	11822.9	9012	7812.1	11451.1	7297.03	-0.608174	0.438542
P68404-2	Prkcb	Isoform Beta-II of Protein kinase C beta type OS=Mus musculus GN=Prkcb	764987	888598	742405	880869	843367	817554	821093	752679	861784	872473	-0.0720283	0.975426
P68510	Ywhah	14-3-3 protein eta OS=Mus musculus GN=Ywhah PE=1 SV=2	5.87102e+06	5.68819e+06	5.26205e+06	5.03929e+06	5.01113e+06	7.51614e+06	7.34284e+06	6.2013e+06	6.45035e+06	6.66086e+06	0.532551	0.0135929
P69566-2	Ranbp9	Isoform 2 of Ran-binding protein 9 OS=Mus musculus GN=Ranbp9	371013	355420	367368	314437	385926	382581	418523	389855	391160	367169	0.117495	0.191927
P70121	Zhx1	Zinc fingers and homeoboxes protein 1 OS=Mus musculus GN=Zhx1 PE=1 SV=2	416158	329371	399851	305242	351727	302955	285059	330493	338040	295976	-0.354376	0.136425
P70122	Sbds	Ribosome maturation protein SBDS OS=Mus musculus GN=Sbds PE=1 SV=4	6.24054e+06	5.50337e+06	5.32778e+06	5.9119e+06	5.2984e+06	6.51118e+06	6.2714e+06	5.78326e+06	5.80994e+06	6.64732e+06	0.305055	0.168076
P70158	Smpdl3a	Acid sphingomyelinase-like phosphodiesterase 3a OS=Mus musculus GN=Smpdl3a PE=2 SV=2	598621	588244	620979	716364	609160	645191	675096	678612	674586	738006	0.215131	0.18581
P70168	Kpnb1	Importin subunit beta-1 OS=Mus musculus GN=Kpnb1 PE=1 SV=2	3.32527e+07	2.78506e+07	3.13117e+07	2.16321e+07	3.07122e+07	3.69251e+07	3.6946e+07	3.45207e+07	3.43688e+07	3.51663e+07	0.291182	0.0646828
P70170	Abcc9	Isoform SUR2B of ATP-binding cassette sub-family C member 9 OS=Mus musculus GN=Abcc9	429021	428947	473891	473992	503226	422940	388143	414662	386423	409406	-0.326973	0.04882
P70175	Dlg3	Disks large homolog 3 OS=Mus musculus GN=Dlg3 PE=1 SV=1	304975	319256	352903	321411	367747	268928	258148	338409	304802	275329	-0.408296	0.10711
P70180	Npr3	Atrial natriuretic peptide receptor 3 OS=Mus musculus GN=Npr3 PE=1 SV=3	8.58342e+06	7.08433e+06	7.12679e+06	9.06293e+06	8.09158e+06	1.40848e+07	1.56835e+07	1.18306e+07	1.32313e+07	1.11451e+07	1.04453	0.00447714
P70195	Psmb7	Proteasome subunit beta type-7 OS=Mus musculus GN=Psmb7 PE=1 SV=1	4.95493e+06	2.82402e+06	2.75336e+06	4.61851e+06	3.13888e+06	4.98529e+06	5.73982e+06	2.85621e+06	3.15254e+06	5.66747e+06	1.03069	0.450719
P70196	Traf6	TNF receptor-associated factor 6 OS=Mus musculus GN=Traf6 PE=1 SV=2	173491	173505	190906	173348	201168	174912	182032	180480	197674	182172	0.0937314	0.924993
P70202	Lxn	Latexin OS=Mus musculus GN=Lxn PE=1 SV=2	2.46867e+06	1.92641e+06	1.81118e+06	2.16346e+06	1.52057e+06	2.51078e+06	2.4079e+06	2.21106e+06	1.97834e+06	2.13325e+06	0.306751	0.270746
P70206	Plxna1	Plexin-A1 OS=Mus musculus GN=Plxna1 PE=1 SV=1	3.33773e+06	3.40379e+06	3.27932e+06	3.83067e+06	3.41014e+06	3.62004e+06	3569789	3.51091e+06	3.51585e+06	3.66017e+06	0.112017	0.472668
P70207	Plxna2	Plexin-A2 OS=Mus musculus GN=Plxna2 PE=1 SV=2	289333	311058	313452	320637	346062	379442	370552	299421	347317	349840	0.246395	0.192549
P70224	Gimap1	GTPase IMAP family member 1 OS=Mus musculus GN=Gimap1 PE=1 SV=3	86900.1	78354.4	85509.6	81363.9	80506.1	70467.4	74657.7	77664.1	78324	71289.8	-0.243193	0.0673023
P70227	Itpr3	"Inositol 1,4,5-trisphosphate receptor type 3 OS=Mus musculus GN=Itpr3 PE=1 SV=3"	442078	350884	426410	352670	369702	362592	396690	349340	388292	366362	-0.0382933	0.639084
P70232	Chl1	Isoform 2 of Neural cell adhesion molecule L1-like protein OS=Mus musculus GN=Chl1	119583	108413	133481	122894	128613	102655	101089	104653	101490	112192	-0.467703	0.0335544
P70236	Map2k6	Dual specificity mitogen-activated protein kinase kinase 6 OS=Mus musculus GN=Map2k6 PE=1 SV=1	154400	166640	195471	169479	169850	154436	158483	154662	163108	152806	-0.228888	0.180105
P70245	Ebp	"3-beta-hydroxysteroid-Delta(8),Delta(7)-isomerase OS=Mus musculus GN=Ebp PE=1 SV=3"	758027	798016	1.08384e+06	1.07354e+06	859996	737470	692134	890681	694142	767698	-0.37297	0.139479
P70257	Nfix	Isoform NFIX1 of Nuclear factor 1 X-type OS=Mus musculus GN=Nfix	193421	147144	127001	105782	116193	180478	160880	135004	136579	140854	0.230603	0.506364
P70261	Pald1	Paladin OS=Mus musculus GN=Pald1 PE=1 SV=1	4.09177e+06	4.24031e+06	4.12943e+06	4.59528e+06	4.22113e+06	4.10523e+06	4.10279e+06	4.15047e+06	3.99127e+06	4.10545e+06	-0.0740179	0.386738
P70266	Pfkfb1	"6-phosphofructo-2-kinase/fructose-2,6-bisphosphatase 1 OS=Mus musculus GN=Pfkfb1 PE=2 SV=2"	4.05521e+06	4.42629e+06	3.98996e+06	4.01429e+06	4.29376e+06	3.67928e+06	3.78421e+06	3.83102e+06	3.89187e+06	4.04657e+06	-0.148871	0.127228
P70268-2	Pkn1	Isoform 2 of Serine/threonine-protein kinase N1 OS=Mus musculus GN=Pkn1	1.58063e+06	1.43294e+06	1.42674e+06	1.22374e+06	1.38098e+06	1.48655e+06	1.72204e+06	1.39685e+06	1.58128e+06	1.56476e+06	0.206392	0.221208
P70269	Ctse	Cathepsin E OS=Mus musculus GN=Ctse PE=1 SV=2	358671	389090	480681	415971	457517	350128	333319	389428	366643	348240	-0.446886	0.0832713
P70271	Pdlim4	PDZ and LIM domain protein 4 OS=Mus musculus GN=Pdlim4 PE=1 SV=3	1.08875e+06	1.16879e+06	1.21965e+06	1.17127e+06	1.28153e+06	1.28565e+06	1.28331e+06	1.19501e+06	1.149e+06	1.17156e+06	0.00901144	0.660782
P70274	Sepp1	Selenoprotein P OS=Mus musculus GN=Sepp1 PE=2 SV=3	1.63824e+06	2.13405e+06	2.29952e+06	2.27921e+06	2.12787e+06	1.78064e+06	1.68585e+06	1.65705e+06	1.64323e+06	1.92169e+06	-0.552075	0.079067
P70288	Hdac2	Histone deacetylase 2 OS=Mus musculus GN=Hdac2 PE=1 SV=1	1.40739e+06	1.3208e+06	1.37621e+06	1.09029e+06	1.20369e+06	1.27344e+06	1.27273e+06	1.15102e+06	1.29879e+06	1.204e+06	-0.0810609	0.724393
P70290	Mpp1	55 kDa erythrocyte membrane protein OS=Mus musculus GN=Mpp1 PE=1 SV=1	1.40861e+07	1.42554e+07	1.15839e+07	1.63852e+07	1.22065e+07	1.47793e+07	1.60533e+07	1.42253e+07	1.3685e+07	1.41863e+07	0.0123194	0.465573
P70295	Aup1	Ancient ubiquitous protein 1 OS=Mus musculus GN=Aup1 PE=2 SV=1	109379	136148	105671	157395	123073	82462.9	89473.4	109509	91784.7	87981.9	-0.78154	0.0303929
P70296	Pebp1	Phosphatidylethanolamine-binding protein 1 OS=Mus musculus GN=Pebp1 PE=1 SV=3	1.16907e+07	1.21018e+07	1.23018e+07	1.27175e+07	1.03076e+07	1.20661e+07	1.1345e+07	1.12281e+07	1.21598e+07	1.09645e+07	-0.148925	0.752645
P70297	Stam	Signal transducing adapter molecule 1 OS=Mus musculus GN=Stam PE=2 SV=3	2.744e+06	2.60558e+06	2.5892e+06	2.389e+06	2.43187e+06	2.97675e+06	2.99745e+06	2.73661e+06	2.84579e+06	3.00454e+06	0.313141	0.0349317
P70302	Stim1	Stromal interaction molecule 1 OS=Mus musculus GN=Stim1 PE=1 SV=2	9.00439e+06	7.42933e+06	7.93312e+06	8.24041e+06	7.46223e+06	7.51537e+06	7.11676e+06	7.91476e+06	8.06958e+06	7.28242e+06	-0.12344	0.407062
P70303	Ctps2	CTP synthase 2 OS=Mus musculus GN=Ctps2 PE=2 SV=1	6.51056e+06	5.78493e+06	7.15374e+06	3.96974e+06	7.5193e+06	6.39875e+06	6.41376e+06	6.54096e+06	6.79616e+06	6.68223e+06	-0.00309102	0.591886
P70313	Nos3	"Nitric oxide synthase, endothelial OS=Mus musculus GN=Nos3 PE=1 SV=4"	3.34037e+06	3.53021e+06	3.17115e+06	2.9846e+06	3.18634e+06	3.45033e+06	3.50959e+06	3.3346e+06	3.20155e+06	3.52048e+06	0.169076	0.374471
P70315	Was	Wiskott-Aldrich syndrome protein homolog OS=Mus musculus GN=Was PE=1 SV=1	190415	177200	220338	208268	218340	189695	147470	169144	163797	217489	-0.533437	0.202772
P70318	Tial1	Nucleolysin TIAR OS=Mus musculus GN=Tial1 PE=1 SV=1	837581	835046	918409	781933	879121	859569	849842	853105	857338	836641	0.0299635	0.96876
P70333	Hnrnph2	Heterogeneous nuclear ribonucleoprotein H2 OS=Mus musculus GN=Hnrnph2 PE=2 SV=1	2.05833e+06	1.35457e+06	2.15173e+06	1.10161e+06	1.97507e+06	1.67687e+06	1.6962e+06	1.69238e+06	1.79968e+06	1.55803e+06	-0.348572	0.976586
P70335-2	Rock1	Isoform 2 of Rho-associated protein kinase 1 OS=Mus musculus GN=Rock1	7.9675e+06	8.32956e+06	7.45632e+06	9.93124e+06	7.80925e+06	8.68618e+06	8.81575e+06	7.87251e+06	7.98511e+06	8.15111e+06	0.0449463	0.963432
P70336	Rock2	Rho-associated protein kinase 2 OS=Mus musculus GN=Rock2 PE=1 SV=1	1.82509e+07	1.6881e+07	1.56396e+07	1.93871e+07	1.61649e+07	2.09679e+07	1.91033e+07	1.78236e+07	1.87511e+07	1.91703e+07	0.289924	0.147497
P70345	Bcl2l2	Bcl-2-like protein 2 OS=Mus musculus GN=Bcl2l2 PE=2 SV=1	381356	372333	396871	444383	437083	385216	393255	445694	428985	373942	-0.0273314	0.981129
P70349	Hint1	Histidine triad nucleotide-binding protein 1 OS=Mus musculus GN=Hint1 PE=1 SV=3	6.92764e+06	6.92371e+06	7.2025e+06	7.64742e+06	5.17539e+06	7.45234e+06	6.9741e+06	6.5987e+06	6.162e+06	6.8972e+06	-0.0111611	0.912612
P70353	Nfyc	Nuclear transcription factor Y subunit gamma OS=Mus musculus GN=Nfyc PE=2 SV=2	154526	156843	189937	160320	182447	126684	112634	133929	142380	127282	-0.598745	0.0135606
P70362	Ufd1l	Ubiquitin fusion degradation protein 1 homolog OS=Mus musculus GN=Ufd1l PE=1 SV=2	6.57158e+06	6.25319e+06	6.23848e+06	5.69943e+06	6.34156e+06	7.7626e+06	7.01973e+06	6.92882e+06	7.22344e+06	7.06302e+06	0.276364	0.0246601
P70372	Elavl1	ELAV-like protein 1 OS=Mus musculus GN=Elavl1 PE=1 SV=2	4.49486e+06	3.80012e+06	4.15081e+06	2.8707e+06	3.66789e+06	4.44047e+06	4.37088e+06	3.89809e+06	4.40319e+06	3.86461e+06	0.314035	0.330467
P70380	Il18	Interleukin-18 OS=Mus musculus GN=Il18 PE=1 SV=2	280918	266063	257676	322780	246888	288351	295430	306934	288684	286951	0.191817	0.333733
P70387	Hfe	Hereditary hemochromatosis protein homolog OS=Mus musculus GN=Hfe PE=2 SV=2	2.40861e+06	2.52779e+06	2.62521e+06	2.62093e+06	2.72475e+06	3.02755e+06	3.9445e+06	2.78218e+06	2.87087e+06	2.84934e+06	0.189179	0.0862669
P70388	Rad50	Isoform 2 of DNA repair protein RAD50 OS=Mus musculus GN=Rad50	610404	541125	602316	557942	618631	503909	533718	508691	554757	528389	-0.277378	0.0687578
P70389	Igfals	Insulin-like growth factor-binding protein complex acid labile subunit OS=Mus musculus GN=Igfals PE=2 SV=1	1.6241e+06	2.00802e+06	1.79939e+06	2.54304e+06	1.78886e+06	1.6894e+06	1.65067e+06	1.61383e+06	1.59128e+06	1.70639e+06	-0.214386	0.157054
P70392	Rasgrf2	Ras-specific guanine nucleotide-releasing factor 2 OS=Mus musculus GN=Rasgrf2 PE=1 SV=2	265747	229892	276897	222037	325038	292931	300255	307041	301688	324439	0.279672	0.131384
P70398	Usp9x	Probable ubiquitin carboxyl-terminal hydrolase FAF-X OS=Mus musculus GN=Usp9x PE=1 SV=2	1.58861e+07	1.16893e+07	1.52956e+07	6.92787e+06	1.5518e+07	1.82798e+07	1.84288e+07	1.60174e+07	1.69746e+07	1.67995e+07	0.210875	0.139516
P70399	Tp53bp1	Isoform 3 of Tumor suppressor p53-binding protein 1 OS=Mus musculus GN=Tp53bp1	64630.9	62926.4	73578.7	52543.5	84826.2	50040	41268.5	60268.3	65471.6	53384.4	-0.459513	0.151252
P70403	Cux1	Protein CASP OS=Mus musculus GN=Cux1 PE=2 SV=2	1.11638e+06	1.04535e+06	1.05893e+06	1.1368e+06	1.06842e+06	1.09882e+06	1.04903e+06	1.06597e+06	1.12988e+06	1.02842e+06	-0.0295487	0.841515
P70404	Idh3g	"Isocitrate dehydrogenase [NAD] subunit gamma 1, mitochondrial OS=Mus musculus GN=Idh3g PE=1 SV=1"	1.32717e+07	1.69105e+07	1.58358e+07	1.31065e+07	1.66032e+07	1.54658e+07	1.70747e+07	1.56119e+07	1.39101e+07	1.66561e+07	-0.00991209	0.655381
P70426	Rit1	GTP-binding protein Rit1 OS=Mus musculus GN=Rit1 PE=1 SV=1	358236	332119	363865	356009	358493	328356	319311	342564	335827	348092	-0.165194	0.227654
P70428	Ext2	Exostosin-2 OS=Mus musculus GN=Ext2 PE=1 SV=2	112652	133078	140860	116843	153643	116009	106541	109688	135293	125396	-0.322582	0.319492
P70429-2	Evl	Isoform 1 of Ena/VASP-like protein OS=Mus musculus GN=Evl	362365	341552	349226	378337	327820	377226	405331	332866	374899	355372	0.145343	0.459
P70441	Slc9a3r1	Na(+)/H(+) exchange regulatory cofactor NHE-RF1 OS=Mus musculus GN=Slc9a3r1 PE=1 SV=3	5.50369e+06	4.42303e+06	5.51272e+06	5.16131e+06	3.81726e+06	3.91999e+06	4.88801e+06	3.49779e+06	5.09929e+06	3.92499e+06	-0.69427	0.318823
P70444	Bid	BH3-interacting domain death agonist OS=Mus musculus GN=Bid PE=1 SV=2	672182	768725	810212	759543	720884	856468	756347	1.41089e+06	974294	628717	0.300897	0.332908
P70445	Eif4ebp2	Eukaryotic translation initiation factor 4E-binding protein 2 OS=Mus musculus GN=Eif4ebp2 PE=2 SV=1	117230	131806	135513	111761	150613	116423	128396	115908	115418	121048	-0.291274	0.356189
P70451	Fer	Isoform 5 of Tyrosine-protein kinase Fer OS=Mus musculus GN=Fer	1.93987e+06	1.99326e+06	1.94405e+06	2.21508e+06	2.08848e+06	1.99044e+06	1.87631e+06	1.9511e+06	1.82431e+06	2.19629e+06	-0.0578213	0.585271
P70452	Stx4	Syntaxin-4 OS=Mus musculus GN=Stx4 PE=1 SV=1	2.68422e+06	2.74412e+06	2.29364e+06	3.60481e+06	2.24012e+06	3.25702e+06	2.99352e+06	2.84589e+06	2.5752e+06	3.0239e+06	0.245509	0.466111
P70460	Vasp	Vasodilator-stimulated phosphoprotein OS=Mus musculus GN=Vasp PE=1 SV=4	1.29056e+06	1.28498e+06	1.20691e+06	1.29761e+06	1.15382e+06	1.63375e+06	1.5345e+06	1.31999e+06	1.30558e+06	1.38724e+06	0.178468	0.0804691
P70663	Sparcl1	SPARC-like protein 1 OS=Mus musculus GN=Sparcl1 PE=2 SV=3	1.03596e+06	1.01088e+06	1.02272e+06	1.0297e+06	938153	968239	991755	1.03437e+06	917219	958721	-0.123299	0.491431
P70665	Siae	Sialate O-acetylesterase OS=Mus musculus GN=Siae PE=2 SV=3	310735	299986	319800	345980	290452	261186	248748	282053	257569	270776	-0.402224	0.0210546
P70670	Naca	"Nascent polypeptide-associated complex subunit alpha, muscle-specific form OS=Mus musculus GN=Naca PE=1 SV=2"	3.65773e+06	4.08361e+06	3.6945e+06	4.08485e+06	3.85418e+06	4.06081e+06	4.33772e+06	3.7005e+06	3.82825e+06	3.87669e+06	-0.00224262	0.72532
P70671	Irf3	Interferon regulatory factor 3 OS=Mus musculus GN=Irf3 PE=1 SV=1	4.96148e+06	5.42409e+06	4.80972e+06	5.28617e+06	4.81674e+06	5.78305e+06	5.20778e+06	5.02174e+06	4.92912e+06	5.4667e+06	0.105293	0.482656
P70677	Casp3	Caspase-3 OS=Mus musculus GN=Casp3 PE=1 SV=1	949592	1.00664e+06	962138	1.01523e+06	893720	1.06722e+06	1.13322e+06	925836	972746	980842	0.0380464	0.450189
P70694	Akr1c6	Estradiol 17 beta-dehydrogenase 5 OS=Mus musculus GN=Akr1c6 PE=1 SV=1	4.39647e+06	4.30811e+06	4.25813e+06	5.7111e+06	3.58593e+06	1.80869e+06	1.69274e+06	1.91124e+06	2.99963e+06	2672627	-1.97853	0.00739619
P70695	Fbp2	"Fructose-1,6-bisphosphatase isozyme 2 OS=Mus musculus GN=Fbp2 PE=2 SV=2"	598238	357162	598714	399705	282474	354484	411191	300365	474738	311174	-0.321662	0.473247
P70697	Urod	Uroporphyrinogen decarboxylase OS=Mus musculus GN=Urod PE=1 SV=2	1.91539e+06	2.53568e+06	2.27218e+06	2.6869e+06	2.32063e+06	2.2795e+06	2.58914e+06	2.31357e+06	2.26447e+06	2.40269e+06	-0.0318302	0.877032
P70698	Ctps1	CTP synthase 1 OS=Mus musculus GN=Ctps1 PE=1 SV=2	1.93279e+06	1.93873e+06	1.88899e+06	1.77659e+06	2.16335e+06	2.19805e+06	2.09933e+06	1.99093e+06	2.07148e+06	2.07994e+06	0.163708	0.201289
P70699	Gaa	Lysosomal alpha-glucosidase OS=Mus musculus GN=Gaa PE=1 SV=2	2.00576e+06	1.86901e+06	2.44214e+06	1.93097e+06	2.09319e+06	1.67336e+06	1.74562e+06	1.61892e+06	1.82891e+06	1.57004e+06	-0.419975	0.0321852
P70700	Polr1b	DNA-directed RNA polymerase I subunit RPA2 OS=Mus musculus GN=Polr1b PE=2 SV=2	98650.8	87366.8	100656	88170.5	90927.3	77826.1	80972.5	90327.4	100502	91356	-0.0380915	0.465882
P70704	Atp8a1	Isoform 2 of Phospholipid-transporting ATPase IA OS=Mus musculus GN=Atp8a1	485108	524636	547762	582722	602774	431439	441182	485155	504909	480340	-0.295418	0.0539576
P80313	Cct7	T-complex protein 1 subunit eta OS=Mus musculus GN=Cct7 PE=1 SV=1	1.26286e+07	1.30578e+07	1.25013e+07	13583440	1.26877e+07	1.22988e+07	1.3646e+07	1.27977e+07	1.23201e+07	1.26892e+07	-0.0144462	0.822824
P80314	Cct2	T-complex protein 1 subunit beta OS=Mus musculus GN=Cct2 PE=1 SV=4	4.83732e+07	4.77108e+07	4.39783e+07	5.39095e+07	4.62549e+07	5.20265e+07	5.40675e+07	4.77764e+07	4.82148e+07	5.08193e+07	0.146007	0.406667
P80315	Cct4	T-complex protein 1 subunit delta OS=Mus musculus GN=Cct4 PE=1 SV=3	1.23717e+07	1.22844e+07	1.25822e+07	1.27101e+07	1.24602e+07	1.20988e+07	1.2498e+07	1.22318e+07	1.15951e+07	1.22691e+07	-0.0645638	0.472507
P80316	Cct5	T-complex protein 1 subunit epsilon OS=Mus musculus GN=Cct5 PE=1 SV=1	1.80273e+07	1.98015e+07	1.75805e+07	2.12784e+07	1.77782e+07	1.97654e+07	2.17158e+07	1.86777e+07	2.01619e+07	2.03222e+07	0.236001	0.332961
P80317	Cct6a	T-complex protein 1 subunit zeta OS=Mus musculus GN=Cct6a PE=1 SV=3	1.69126e+07	17304313	1.84172e+07	1.87103e+07	2.00366e+07	1.7494e+07	1.87579e+07	1.69594e+07	1.71157e+07	1.78669e+07	-0.114939	0.551297
P80318	Cct3	T-complex protein 1 subunit gamma OS=Mus musculus GN=Cct3 PE=1 SV=1	1.69966e+07	1.74818e+07	1.63807e+07	1.8158e+07	1.6619e+07	1.96138e+07	1.95383e+07	1.8072e+07	1.80327e+07	1.83299e+07	0.167134	0.0886186
P81069-2	Gabpb2	Isoform 2 of GA-binding protein subunit beta-2 OS=Mus musculus GN=Gabpb2	22990	24295.7	24119.6	20735.9	25105.1	24414.8	24743.1	24515.4	24084.6	28505.1	0.0289584	0.280649
P81117	Nucb2	Nucleobindin-2 OS=Mus musculus GN=Nucb2 PE=1 SV=2	5.38674e+06	3.86388e+06	5.35959e+06	3.5232e+06	4.65007e+06	5.18105e+06	5.05357e+06	4.60486e+06	4.93961e+06	4.7047e+06	0.110629	0.476314
P81122	Irs2	Insulin receptor substrate 2 OS=Mus musculus GN=Irs2 PE=1 SV=2	173059	189798	140410	202223	147692	240343	218305	196644	190850	230942	0.528821	0.0592223
P81270	Erg	Isoform 2 of Transcriptional regulator ERG OS=Mus musculus GN=Erg	895888	850963	748641	729302	715774	780832	758675	751584	735747	762614	0.0238007	0.614574
P82198	Tgfbi	Transforming growth factor-beta-induced protein ig-h3 OS=Mus musculus GN=Tgfbi PE=2 SV=1	3.88453e+06	3.42559e+06	3.19408e+06	3.23799e+06	3.58735e+06	3.5865e+06	3.43115e+06	3.21005e+06	3.44626e+06	3.15626e+06	0.00364019	0.681683
P82343	Renbp	N-acylglucosamine 2-epimerase OS=Mus musculus GN=Renbp PE=1 SV=3	426912	349323	499357	231407	450650	293139	335561	385437	421690	380107	-0.244815	0.818007
P82347	Sgcd	Delta-sarcoglycan OS=Mus musculus GN=Sgcd PE=1 SV=1	1.10088e+07	1.06364e+07	9.74339e+06	1.02951e+07	1.07826e+07	1.11258e+07	1.18363e+07	1.15285e+07	1.1806e+07	1.19455e+07	0.22167	0.0510562
P82349	Sgcb	Beta-sarcoglycan OS=Mus musculus GN=Sgcb PE=1 SV=1	6.35032e+06	5.71281e+06	5.84214e+06	5.60514e+06	6.2819e+06	6.49745e+06	6.75975e+06	6.19977e+06	6.7491e+06	6.52095e+06	0.245012	0.0884133
P83093	Stim2	Stromal interaction molecule 2 OS=Mus musculus GN=Stim2 PE=1 SV=2	231160	263032	236814	250552	235612	241569	270493	263305	255158	284339	0.221581	0.197015
P83741-3	Wnk1	Isoform 2 of Serine/threonine-protein kinase WNK1 OS=Mus musculus GN=Wnk1	3.56748e+06	3.68513e+06	3.35569e+06	4.40309e+06	3.80262e+06	3.83378e+06	3.81158e+06	3.68051e+06	3.63581e+06	3.77825e+06	0.0583906	0.999253
P83870	Phf5a	PHD finger-like domain-containing protein 5A OS=Mus musculus GN=Phf5a PE=1 SV=1	502542	569722	604805	623291	675012	420636	424773	447548	493824	473737	-0.679524	0.0141058
P83877	Txnl4a	Thioredoxin-like protein 4A OS=Mus musculus GN=Txnl4a PE=2 SV=1	106520	105532	145916	108710	127378	104092	101173	119953	116424	110963	0.0256404	0.503905
P83882	Rpl36a	60S ribosomal protein L36a OS=Mus musculus GN=Rpl36a PE=1 SV=2	3.86085e+06	1.46629e+06	3.17749e+06	1.282e+06	3.13811e+06	4.26122e+06	5.6705e+06	3.96006e+06	3.80952e+06	3.83902e+06	0.480186	0.0780636
P83917	Cbx1	Chromobox protein homolog 1 OS=Mus musculus GN=Cbx1 PE=1 SV=1	361320	229883	231907	248035	229398	299133	230825	259376	238845	266265	0.238119	0.961714
P83940	Tceb1	Transcription elongation factor B polypeptide 1 OS=Mus musculus GN=Tceb1 PE=1 SV=1	1.14127e+07	1.26747e+07	1.0977e+07	1.19686e+07	1.05841e+07	1.31595e+07	1.38426e+07	1.18864e+07	1.18228e+07	1.21868e+07	0.143427	0.1993
P84075	Hpca	Neuron-specific calcium-binding protein hippocalcin OS=Mus musculus GN=Hpca PE=1 SV=2	433683	319487	530115	354116	365408	237301	259651	270540	256912	263729	-0.819936	0.0120113
P84084	Arf5	ADP-ribosylation factor 5 OS=Mus musculus GN=Arf5 PE=1 SV=2	670545	661025	661836	751129	688335	593476	608245	675212	579787	594051	-0.285745	0.065027
P84089	Erh	Enhancer of rudimentary homolog OS=Mus musculus GN=Erh PE=1 SV=1	425549	296933	357505	196611	305603	274409	264457	269931	317584	259911	-0.303619	0.561015
P84091	Ap2m1	AP-2 complex subunit mu OS=Mus musculus GN=Ap2m1 PE=1 SV=1	1.01287e+07	8.79876e+06	9.10539e+06	9.29607e+06	8.11808e+06	1.03293e+07	9.40901e+06	9.50301e+06	9.3861e+06	9.52456e+06	0.0803841	0.341006
P84096	Rhog	Rho-related GTP-binding protein RhoG OS=Mus musculus GN=Rhog PE=2 SV=1	1.70912e+06	1.78006e+06	1.84856e+06	1.7528e+06	1.60813e+06	1.62644e+06	1.57515e+06	1.98023e+06	1.79182e+06	1.73437e+06	-0.0575717	0.989595
P84099	Rpl19	60S ribosomal protein L19 OS=Mus musculus GN=Rpl19 PE=1 SV=1	1.07646e+07	3.90848e+06	1.02198e+07	3.20981e+06	8.30492e+06	1.04737e+07	1.0599e+07	9.44823e+06	1.06144e+07	9.03285e+06	0.488865	0.198985
P84102	Serf2	Small EDRK-rich factor 2 OS=Mus musculus GN=Serf2 PE=2 SV=1	281091	372222	290688	369303	313842	358789	352999	278575	282365	318999	0.0210613	0.862572
P84104	Srsf3	Serine/arginine-rich splicing factor 3 OS=Mus musculus GN=Srsf3 PE=1 SV=1	1.63758e+06	1.12628e+06	1.58464e+06	1.08093e+06	1.19463e+06	1.29362e+06	1.34949e+06	1.20053e+06	1.38365e+06	1.23537e+06	0.166402	0.944276
P84228	Hist1h3b	Histone H3.2 OS=Mus musculus GN=Hist1h3b PE=1 SV=2	248436	134229	168260	100937	164921	130549	134174	261279	293221	136346	-0.519684	0.666726
P84309-2	Adcy5	Isoform 2 of Adenylate cyclase type 5 OS=Mus musculus GN=Adcy5	892322	805153	820692	772058	833101	915429	949041	886842	895147	946182	0.246305	0.0530892
P85094	Isoc2a	"Isochorismatase domain-containing protein 2A, mitochondrial OS=Mus musculus GN=Isoc2a PE=1 SV=1"	7.86476e+06	1.20441e+07	1.4548e+07	8.3309e+06	1.54531e+07	1.18636e+07	8.181e+06	8.68316e+06	6.98179e+06	1.48725e+07	-0.701904	0.586325
P97287-2	Mcl1	Isoform 2 of Induced myeloid leukemia cell differentiation protein Mcl-1 homolog OS=Mus musculus GN=Mcl1	316651	278811	330878	273764	301555	202532	216199	281025	254182	246669	-0.461589	0.040783
P97290	Serping1	Plasma protease C1 inhibitor OS=Mus musculus GN=Serping1 PE=1 SV=3	9.06499e+06	9.09362e+06	9.07242e+06	9.95428e+06	8.06118e+06	8.96065e+06	8.63873e+06	9.03373e+06	7.74608e+06	8.58145e+06	-0.112364	0.437514
P97298	Serpinf1	Pigment epithelium-derived factor OS=Mus musculus GN=Serpinf1 PE=1 SV=2	3.12656e+06	3.12666e+06	3.13635e+06	3.22762e+06	2.82124e+06	3.17706e+06	3.14664e+06	3.03446e+06	3.04717e+06	3.19058e+06	0.0135853	0.833106
P97300	Nptn	Isoform 1 of Neuroplastin OS=Mus musculus GN=Nptn	3.35232e+06	3.32245e+06	3.16742e+06	3.95684e+06	3.3274e+06	3.65591e+06	3.53506e+06	3.39021e+06	3.26787e+06	3.55762e+06	0.124209	0.792958
P97304	Polr1d	DNA-directed RNA polymerases I and III subunit RPAC2 OS=Mus musculus GN=Polr1d PE=2 SV=1	571364	527085	580557	609689	541785	487097	499362	536792	460627	402044	-0.357552	0.0520912
P97305	Nfatc3	"Isoform X2 of Nuclear factor of activated T-cells, cytoplasmic 3 OS=Mus musculus GN=Nfatc3"	217167	176456	218304	145800	240051	227446	213004	214463	219433	206451	-0.0392916	0.441312
P97310	Mcm2	DNA replication licensing factor MCM2 OS=Mus musculus GN=Mcm2 PE=1 SV=3	332897	355231	471274	332336	459785	286272	305323	356734	370849	293643	-0.373357	0.160407
P97311	Mcm6	DNA replication licensing factor MCM6 OS=Mus musculus GN=Mcm6 PE=1 SV=1	242834	273350	282454	291505	232346	296424	285047	280883	284175	271733	0.0767882	0.290129
P97313	Prkdc	DNA-dependent protein kinase catalytic subunit OS=Mus musculus GN=Prkdc PE=1 SV=3	825067	747058	1.09828e+06	861382	1.04204e+06	608662	529441	732529	799017	619880	-0.85427	0.039938
P97314	Csrp2	Cysteine and glycine-rich protein 2 OS=Mus musculus GN=Csrp2 PE=1 SV=3	3.0094e+06	2.15051e+06	2.23937e+06	2.29287e+06	2.096e+06	2.37738e+06	2.51381e+06	2.42044e+06	2.14208e+06	2.17756e+06	0.133709	0.957751
P97315	Csrp1	Cysteine and glycine-rich protein 1 OS=Mus musculus GN=Csrp1 PE=1 SV=3	2.22515e+07	17730311	1.8164e+07	1.94244e+07	1.56103e+07	2.063e+07	2.0218e+07	2.26147e+07	1.70025e+07	2.01166e+07	0.23879	0.438272
P97321-2	Fap	Isoform 2 of Prolyl endopeptidase FAP OS=Mus musculus GN=Fap	147398	170777	185467	188535	191129	151106	159959	170114	169966	165108	-0.256871	0.328728
P97328	Khk	Ketohexokinase OS=Mus musculus GN=Khk PE=1 SV=1	573596	433849	593630	476717	488906	442477	437415	380092	503272	428611	-0.271269	0.143738
P97333	Nrp1	Neuropilin-1 OS=Mus musculus GN=Nrp1 PE=1 SV=2	2.28286e+06	1.76319e+06	1.89975e+06	1.63992e+06	1.97644e+06	1.82817e+06	1.52896e+06	1.74233e+06	1.49084e+06	1.80313e+06	-0.201897	0.198898
P97346	Nxn	Nucleoredoxin OS=Mus musculus GN=Nxn PE=1 SV=1	362744	302235	372452	356147	259606	253111	315121	333630	642725	273494	-0.331075	0.868763
P97351	Rps3a	40S ribosomal protein S3a OS=Mus musculus GN=Rps3a PE=1 SV=3	1.69404e+07	8.70028e+06	1.80054e+07	6.14681e+06	1.50402e+07	1.9194e+07	1.93005e+07	1.67617e+07	1.58799e+07	1.6766e+07	0.232136	0.183213
P97352	S100a13	Protein S100-A13 OS=Mus musculus GN=S100a13 PE=1 SV=1	1.29476e+07	9.95794e+06	1.03119e+07	1.28432e+07	1.13365e+07	1.19849e+07	1.1786e+07	1.31115e+07	1.11045e+07	1.19868e+07	0.111775	0.578339
P97355	Sms	Spermine synthase OS=Mus musculus GN=Sms PE=1 SV=1	72146.9	82544.2	103346	88813.2	107440	141419	111985	168229	109728	80802.8	0.581384	0.157054
P97363	Sptlc2	Serine palmitoyltransferase 2 OS=Mus musculus GN=Sptlc2 PE=2 SV=2	424777	396577	383779	402018	380463	425850	401725	411170	429786	395804	0.0717986	0.42403
P97364	Sephs2	"Selenide, water dikinase 2 OS=Mus musculus GN=Sephs2 PE=1 SV=3"	1.49112e+06	597519	1.58603e+06	570435	972568	888940	1.34524e+06	450341	503746	522285	-1.00266	0.383921
P97369	Ncf4	Neutrophil cytosol factor 4 OS=Mus musculus GN=Ncf4 PE=1 SV=2	618724	769779	871756	916571	773754	734599	764465	703957	802452	674421	-0.130006	0.536513
P97370	Atp1b3	Sodium/potassium-transporting ATPase subunit beta-3 OS=Mus musculus GN=Atp1b3 PE=1 SV=1	1.01864e+07	9.4976e+06	8.87657e+06	1.0913e+07	8.56239e+06	1.14597e+07	1.10977e+07	9.99251e+06	9.91119e+06	1.0893e+07	0.316538	0.174764
P97371	Psme1	Proteasome activator complex subunit 1 OS=Mus musculus GN=Psme1 PE=2 SV=2	14887773	1.44821e+07	1.33498e+07	1.64111e+07	1.3177e+07	1.57209e+07	1.39017e+07	1.41956e+07	1.34787e+07	1.45533e+07	-0.0549143	0.957751
P97372	Psme2	Proteasome activator complex subunit 2 OS=Mus musculus GN=Psme2 PE=2 SV=4	1.21354e+07	1.42523e+07	1.19969e+07	1.48452e+07	1.28933e+07	1.62388e+07	1.50687e+07	1.34431e+07	1.38305e+07	1.44682e+07	0.215348	0.20322
P97376	Frg1	Protein FRG1 OS=Mus musculus GN=Frg1 PE=1 SV=2	198621	252226	312119	307228	327355	173568	181251	270157	203221	205362	-0.935367	0.0845867
P97379	G3bp2	Ras GTPase-activating protein-binding protein 2 OS=Mus musculus GN=G3bp2 PE=1 SV=2	5.78147e+06	5.14682e+06	6.13996e+06	3.46326e+06	6.17826e+06	5.30509e+06	5.81253e+06	5.77975e+06	6.08045e+06	5.45355e+06	-0.0133176	0.582094
P97384	Anxa11	Annexin A11 OS=Mus musculus GN=Anxa11 PE=1 SV=2	1.26701e+07	1.20648e+07	1.34645e+07	1.282e+07	1.27417e+07	1.19377e+07	1.18845e+07	1.1798e+07	1.19222e+07	1.18133e+07	-0.169766	0.105048
P97386	Lig3	DNA ligase 3 OS=Mus musculus GN=Lig3 PE=1 SV=2	780051	720313	891723	791605	853473	632911	615126	625187	657187	597530	-0.599829	0.00710433
P97390	Vps45	Vacuolar protein sorting-associated protein 45 OS=Mus musculus GN=Vps45 PE=1 SV=1	2.13773e+06	2.26947e+06	2.63134e+06	2.35118e+06	2.54574e+06	1.96647e+06	2.07538e+06	2.41274e+06	2.13803e+06	2.21265e+06	-0.262538	0.193183
P97393	Arhgap5	Rho GTPase-activating protein 5 OS=Mus musculus GN=Arhgap5 PE=1 SV=2	2.19564e+06	2.1915e+06	2.1208e+06	2.14923e+06	2.25893e+06	2.27143e+06	2.31348e+06	2.27312e+06	2.31146e+06	2.24619e+06	0.0860906	0.241386
P97412	Lyst	Lysosomal-trafficking regulator OS=Mus musculus GN=Lyst PE=1 SV=1	550154	521614	560610	478643	559359	552033	611165	524726	597029	517701	0.00848863	0.480462
P97425	Ear2	Eosinophil cationic protein 2 OS=Mus musculus GN=Ear2 PE=2 SV=1	70624	98461	101742	120027	101537	90872.4	64803.9	76363.2	71826.9	65524.4	-0.792266	0.0715656
P97426	Ear1	Eosinophil cationic protein 1 OS=Mus musculus GN=Ear1 PE=2 SV=1	624073	689730	757515	720391	1.07307e+06	706599	500414	608376	563567	591765	-0.509616	0.100101
P97429	Anxa4	Annexin A4 OS=Mus musculus GN=Anxa4 PE=2 SV=4	9.9678e+06	8.79227e+06	1.07143e+07	9.39722e+06	8.89859e+06	8.46279e+06	8.56377e+06	8.49441e+06	8.92274e+06	8.28357e+06	-0.279794	0.0939284
P97433	Arhgef28	Rho guanine nucleotide exchange factor 28 OS=Mus musculus GN=Arhgef28 PE=1 SV=1	101328	84286.7	98124.6	94319.5	87928.3	101183	109579	89321.7	109730	98015.5	0.141867	0.257799
P97434-2	Mprip	Isoform 2 of Myosin phosphatase Rho-interacting protein OS=Mus musculus GN=Mprip	3.63882e+06	3.18963e+06	3.30488e+06	2.99631e+06	3.57876e+06	3.5991e+06	3.44527e+06	3.0949e+06	3.51905e+06	3.10668e+06	0.0941515	0.963966
P97447	Fhl1	Four and a half LIM domains protein 1 OS=Mus musculus GN=Fhl1 PE=1 SV=3	1.9916e+07	2.24726e+07	1.88624e+07	2.2751e+07	2.5174e+07	3.47753e+07	3.36094e+07	3.1322e+07	2.5622e+07	3.16277e+07	0.792801	0.0104985
P97449	Anpep	Aminopeptidase N OS=Mus musculus GN=Anpep PE=1 SV=4	6.75102e+06	6.01188e+06	6.49282e+06	6.74622e+06	5.8111e+06	4.77802e+06	5.69943e+06	5.45079e+06	6.08671e+06	5.55797e+06	-0.349807	0.0733526
P97450	Atp5j	"ATP synthase-coupling factor 6, mitochondrial OS=Mus musculus GN=Atp5j PE=1 SV=1"	4.68766e+06	5.5675e+06	4.97775e+06	5.21682e+06	5.18594e+06	3.86274e+06	4.04571e+06	4.26128e+06	4.07429e+06	4.19693e+06	-0.550579	0.00679685
P97452	Bop1	Ribosome biogenesis protein BOP1 OS=Mus musculus GN=Bop1 PE=1 SV=1	231272	202417	205093	182449	185503	221859	212878	201295	210623	196753	0.0791719	0.591221
P97454	Smad5	Mothers against decapentaplegic homolog 5 OS=Mus musculus GN=Smad5 PE=1 SV=2	671230	633591	710790	663878	669733	606871	627772	634698	619439	609018	-0.193925	0.0943369
P97457	Mylpf	"Myosin regulatory light chain 2, skeletal muscle isoform OS=Mus musculus GN=Mylpf PE=1 SV=3"	196702	184075	157868	167927	136630	348022	159325	206747	164364	170463	0.0309884	0.39212
P97461	Rps5	40S ribosomal protein S5 OS=Mus musculus GN=Rps5 PE=1 SV=3	4.83982e+06	4.38574e+06	5.42276e+06	5.41507e+06	5.04705e+06	5.03035e+06	4.96653e+06	5.02084e+06	4.73235e+06	4.86069e+06	-0.0468205	0.800881
P97467	Pam	Peptidyl-glycine alpha-amidating monooxygenase OS=Mus musculus GN=Pam PE=1 SV=2	288390	319991	384872	308067	363757	267824	249018	348708	302923	295075	-0.189315	0.230023
P97468	Cmklr1	Chemokine-like receptor 1 OS=Mus musculus GN=Cmklr1 PE=1 SV=1	2.66642e+06	3.49714e+06	3.13254e+06	3.19299e+06	3.53319e+06	3.77806e+06	3.62484e+06	3.36347e+06	3.63126e+06	3.78135e+06	0.27977	0.116645
P97470	Ppp4c	Serine/threonine-protein phosphatase 4 catalytic subunit OS=Mus musculus GN=Ppp4c PE=1 SV=2	587914	613603	629742	564727	603429	659214	728221	651625	652587	625711	0.150243	0.0829643
P97471	Smad4	Mothers against decapentaplegic homolog 4 OS=Mus musculus GN=Smad4 PE=1 SV=2	559429	596435	565773	630860	554108	574065	574412	563628	592091	548666	0.0309666	0.733206
P97473	Tarbp2	RISC-loading complex subunit TARBP2 OS=Mus musculus GN=Tarbp2 PE=1 SV=2	241125	224806	262104	226860	271358	238561	232335	248333	227555	249974	-0.0260122	0.745722
P97478	Coq7	Ubiquinone biosynthesis protein COQ7 homolog OS=Mus musculus GN=Coq7 PE=2 SV=3	2.18584e+06	2.1684e+06	1.855e+06	2.14198e+06	1.7648e+06	1.91963e+06	2.01804e+06	1.67431e+06	1.89161e+06	1.79662e+06	-0.311598	0.301024
P97480-2	Eya3	Isoform 2 of Eyes absent homolog 3 OS=Mus musculus GN=Eya3	112287	103504	108060	117344	108905	121956	104258	111758	112798	106567	0.03389	0.839171
P97492	Rgs14	Regulator of G-protein signaling 14 OS=Mus musculus GN=Rgs14 PE=1 SV=2	16741	21744	22932.1	24739.1	19179.2	21939.7	19256	18111.1	19312.9	20376.5	-0.30013	0.606319
P97493	Txn2	"Thioredoxin, mitochondrial OS=Mus musculus GN=Txn2 PE=1 SV=1"	271195	284873	255876	272429	251237	255497	269371	270090	260737	274128	-0.0226173	0.950296
P97494	Gclc	Glutamate--cysteine ligase catalytic subunit OS=Mus musculus GN=Gclc PE=2 SV=4	5.75263e+06	5.95701e+06	6.15862e+06	6.19002e+06	5.91663e+06	5.25349e+06	5.70083e+06	5.30187e+06	5.45114e+06	5.64762e+06	-0.206523	0.0617638
P97496-2	Smarcc1	Isoform 2 of SWI/SNF complex subunit SMARCC1 OS=Mus musculus GN=Smarcc1	622892	621370	608993	634673	549985	720881	664844	596913	605497	569467	-0.0661961	0.62477
P97499	Tep1	Telomerase protein component 1 OS=Mus musculus GN=Tep1 PE=1 SV=1	1.49312e+06	1.32122e+06	1.42552e+06	1.34426e+06	1.44931e+06	1.58718e+06	1.59953e+06	1.53795e+06	1.53567e+06	1.45873e+06	0.153807	0.084825
P97742	Cpt1a	"Carnitine O-palmitoyltransferase 1, liver isoform OS=Mus musculus GN=Cpt1a PE=1 SV=4"	6.77944e+06	7.2112e+06	8.32206e+06	7.522e+06	7.396e+06	6.95405e+06	8.02891e+06	7.2679e+06	7.65499e+06	7.60323e+06	0.049858	0.906742
P97765	Wbp2	WW domain-binding protein 2 OS=Mus musculus GN=Wbp2 PE=1 SV=1	1.04106e+06	999221	907207	959875	907543	928878	948951	1.01761e+06	952857	924605	-0.0584309	0.897372
P97770-2	Thumpd3	Isoform 2 of THUMP domain-containing protein 3 OS=Mus musculus GN=Thumpd3	1.09305e+06	1.04624e+06	1.03068e+06	1.13176e+06	975582	1.07007e+06	1.03977e+06	1.12968e+06	1.13798e+06	1.04995e+06	0.0551409	0.599344
P97789-2	Xrn1	Isoform 2 of 5'-3' exoribonuclease 1 OS=Mus musculus GN=Xrn1	1.69417e+06	1.6047e+06	1.82364e+06	1.66596e+06	1.75271e+06	1.51218e+06	1.47094e+06	1.58777e+06	1.52253e+06	1.44339e+06	-0.262456	0.0340618
P97797-2	Sirpa	Isoform 2 of Tyrosine-protein phosphatase non-receptor type substrate 1 OS=Mus musculus GN=Sirpa	763562	692903	716579	731352	815187	747781	725845	575920	804842	775225	0.0223727	0.76136
P97798	Neo1	Isoform 2 of Neogenin OS=Mus musculus GN=Neo1	900555	917492	909932	987522	931079	950699	939815	927647	930946	954837	0.0567531	0.771851
P97807-2	Fh	"Isoform Cytoplasmic of Fumarate hydratase, mitochondrial OS=Mus musculus GN=Fh"	2.14223e+07	2.36756e+07	2.11638e+07	2.24007e+07	2.13677e+07	2.21123e+07	2.2707e+07	2.24896e+07	2.14448e+07	2.33656e+07	0.088454	0.69575
P97813	Pld2	Phospholipase D2 OS=Mus musculus GN=Pld2 PE=1 SV=2	461631	406532	453751	390065	424402	395277	397662	463737	412913	403811	-0.129384	0.662582
P97817	Cdr2	Cerebellar degeneration-related protein 2 OS=Mus musculus GN=Cdr2 PE=1 SV=2	200072	143075	164841	99985.3	207419	338176	283533	271699	263204	268509	1.13865	0.0154443
P97819-2	Pla2g6	Isoform Short of 85/88 kDa calcium-independent phospholipase A2 OS=Mus musculus GN=Pla2g6	1.15041e+06	1.25574e+06	1.21916e+06	1.43769e+06	1.35463e+06	1.26544e+06	1.1972e+06	1.23648e+06	1.18367e+06	1.24024e+06	-0.0449405	0.488489
P97820	Map4k4	Mitogen-activated protein kinase kinase kinase kinase 4 OS=Mus musculus GN=Map4k4 PE=1 SV=1	735245	830573	858898	728149	831019	918231	900567	904249	933343	937186	0.233501	0.0341182
P97821	Ctsc	Dipeptidyl peptidase 1 OS=Mus musculus GN=Ctsc PE=2 SV=1	2.08615e+06	2.34581e+06	1.87676e+06	2.40203e+06	1.81007e+06	2.19953e+06	2.09643e+06	2.05419e+06	1.84792e+06	1.94368e+06	-0.0483203	0.737081
P97822-2	Anp32e	Isoform 2 of Acidic leucine-rich nuclear phosphoprotein 32 family member E OS=Mus musculus GN=Anp32e	4.13866e+06	3.57451e+06	4.49253e+06	1.82367e+06	3.49478e+06	3.19776e+06	3.19551e+06	3.08567e+06	3.21436e+06	3.10826e+06	-0.253358	0.791903
P97823	Lypla1	Acyl-protein thioesterase 1 OS=Mus musculus GN=Lypla1 PE=1 SV=1	5.09682e+06	4.99054e+06	5.02569e+06	4.76329e+06	4.89927e+06	5.2035e+06	5.31015e+06	5.44538e+06	5.405e+06	5.40695e+06	0.167964	0.0715656
P97825	Hn1	Hematological and neurological expressed 1 protein OS=Mus musculus GN=Hn1 PE=1 SV=3	281988	350829	291024	491271	268669	442516	456460	370824	344298	362479	0.55601	0.276687
P97855	G3bp1	Ras GTPase-activating protein-binding protein 1 OS=Mus musculus GN=G3bp1 PE=1 SV=1	5.86844e+06	5.43719e+06	5.95907e+06	4.68074e+06	5.65414e+06	5.47263e+06	5.88109e+06	5.34331e+06	5.60998e+06	5.18061e+06	-0.0817904	0.987406
P97857	Adamts1	A disintegrin and metalloproteinase with thrombospondin motifs 1 OS=Mus musculus GN=Adamts1 PE=1 SV=4	47730.3	37121.2	42004.6	41705.5	37595.1	41059.4	36178.6	39647.4	33897	41350.5	-0.14261	0.41525
P97858	Slc35b1	Solute carrier family 35 member B1 OS=Mus musculus GN=Slc35b1 PE=2 SV=1	78710.8	73874.9	79503.2	93073	86128.6	76013	73940	77522.5	67925.2	73239.7	-0.174001	0.136068
P97863	Nfib	Isoform 2 of Nuclear factor 1 B-type OS=Mus musculus GN=Nfib	251088	208998	216819	204455	211452	249088	268231	216483	231774	232353	0.201166	0.227764
P97864	Casp7	Caspase-7 OS=Mus musculus GN=Casp7 PE=1 SV=2	1.10816e+06	1.35814e+06	1.23032e+06	1.80744e+06	1.1115e+06	1.22906e+06	1.19316e+06	1.0763e+06	1.16872e+06	1.18053e+06	-0.104279	0.395913
P97865	Pex7	Peroxisomal targeting signal 2 receptor OS=Mus musculus GN=Pex7 PE=2 SV=1	88639.4	109258	144777	113770	161602	79952.7	77137.3	113429	90457	91672.2	-0.583187	0.0943369
P97868	Rbbp6	E3 ubiquitin-protein ligase RBBP6 OS=Mus musculus GN=Rbbp6 PE=1 SV=5	238113	195917	190984	182775	196231	195353	170015	179076	186105	201105	-0.123836	0.358334
P97872	Fmo5	Dimethylaniline monooxygenase [N-oxide-forming] 5 OS=Mus musculus GN=Fmo5 PE=2 SV=4	5.88129e+06	6.31213e+06	6.4222e+06	6.47013e+06	6.07024e+06	6.68963e+06	6.48815e+06	6.46592e+06	6.85058e+06	7.00763e+06	0.136857	0.133154
P97927	Lama4	Laminin subunit alpha-4 OS=Mus musculus GN=Lama4 PE=1 SV=2	4.83015e+07	3.54941e+07	3.39962e+07	3.22712e+07	3.59782e+07	4.01981e+07	4.01198e+07	3.72762e+07	4.3753e+07	3.71845e+07	0.280096	0.484895
P97929	Brca2	Breast cancer type 2 susceptibility protein homolog OS=Mus musculus GN=Brca2 PE=1 SV=2	568384	497208	686494	515657	427691	491426	512966	462848	511246	488357	-0.143673	0.48551
P97930	Dtymk	Thymidylate kinase OS=Mus musculus GN=Dtymk PE=2 SV=2	2.07099e+06	2.30841e+06	2.43248e+06	2.50894e+06	2.22966e+06	1.90141e+06	1.94021e+06	1.90668e+06	1.94629e+06	2.01308e+06	-0.404675	0.0182688
P98063	Bmp1	Bone morphogenetic protein 1 OS=Mus musculus GN=Bmp1 PE=1 SV=2	89297	79266.4	95213.2	84753.5	80890.4	83708.9	105658	77443.6	81478	83146.2	-0.0750106	0.993248
P98064	Masp1	Mannan-binding lectin serine protease 1 OS=Mus musculus GN=Masp1 PE=1 SV=2	294683	264184	273270	259027	274926	257346	229934	246303	230195	235212	-0.348067	0.0367441
P98078	Dab2	Isoform p93 of Disabled homolog 2 OS=Mus musculus GN=Dab2	9.46604e+06	7.6834e+06	9.40546e+06	8.22619e+06	6.55568e+06	6.57562e+06	7.8631e+06	6.61645e+06	8.23257e+06	6.73002e+06	-0.520772	0.243483
P98083	Shc1	SHC-transforming protein 1 OS=Mus musculus GN=Shc1 PE=1 SV=3	161107	236868	277809	158370	182837	235499	200851	134769	204516	172195	0.20257	0.759201
P98086	C1qa	Complement C1q subcomponent subunit A OS=Mus musculus GN=C1qa PE=1 SV=2	670370	674861	665937	827905	638313	659327	718235	777248	919424	766562	0.301811	0.323902
P98156	Vldlr	Very low-density lipoprotein receptor OS=Mus musculus GN=Vldlr PE=1 SV=1	974989	953117	1.01882e+06	978949	1.22377e+06	1.33849e+06	1.66355e+06	1.45428e+06	1.26224e+06	1.41678e+06	0.863369	0.0103311
P98192	Gnpat	Dihydroxyacetone phosphate acyltransferase OS=Mus musculus GN=Gnpat PE=2 SV=1	6.89788e+06	7.07292e+06	6.32937e+06	7.44036e+06	6.6707e+06	7.65657e+06	8.46475e+06	7.85106e+06	7.50762e+06	7.36666e+06	0.23579	0.0615363
P98195-2	Atp9b	Isoform 2 of Probable phospholipid-transporting ATPase IIB OS=Mus musculus GN=Atp9b	55776.2	47618.3	49806.9	57856.4	44955.1	58602.7	51938.1	50762.9	48668.5	52819.7	0.0935815	0.737081
P98197	Atp11a	Probable phospholipid-transporting ATPase IH OS=Mus musculus GN=Atp11a PE=2 SV=1	936891	665078	950574	699045	617656	625607	710729	603092	800064	622366	-0.299194	0.352116
P98203-2	Arvcf	Isoform 2 of Armadillo repeat protein deleted in velo-cardio-facial syndrome homolog OS=Mus musculus GN=Arvcf	83682.5	59541.4	90317.1	93206.3	96144.2	62110.7	50833	77688.1	71280.5	68019.7	-0.63191	0.122647
P99024	Tubb5	Tubulin beta-5 chain OS=Mus musculus GN=Tubb5 PE=1 SV=1	8.88006e+06	7.13572e+06	8.38036e+06	3.31537e+06	7.25775e+06	9.74486e+06	1.01825e+07	9.04954e+06	8.77777e+06	9.32308e+06	0.549713	0.152617
P99026	Psmb4	Proteasome subunit beta type-4 OS=Mus musculus GN=Psmb4 PE=1 SV=1	5.03866e+06	4.95458e+06	5.06277e+06	5.06514e+06	4.87025e+06	5.41108e+06	5.2552e+06	4.70545e+06	5.14169e+06	4.90816e+06	0.0316246	0.754933
P99027	Rplp2	60S acidic ribosomal protein P2 OS=Mus musculus GN=Rplp2 PE=1 SV=3	9.12679e+06	5.15241e+06	9.78441e+06	3.54212e+06	8.55834e+06	9.4427e+06	9.49134e+06	9.04513e+06	9.01613e+06	9.01851e+06	0.111092	0.23203
P99028	Uqcrh	"Cytochrome b-c1 complex subunit 6, mitochondrial OS=Mus musculus GN=Uqcrh PE=1 SV=2"	4.95735e+06	5.23702e+06	4.62118e+06	4.02144e+06	4.90261e+06	4.60255e+06	4.44921e+06	4.24401e+06	4.05286e+06	4.19026e+06	-0.33986	0.209398
P99029	Prdx5	"Peroxiredoxin-5, mitochondrial OS=Mus musculus GN=Prdx5 PE=1 SV=2"	5.37894e+07	5.48846e+07	5.56205e+07	5.81796e+07	5.75762e+07	7.06803e+07	7.38289e+07	6.17987e+07	6.3502e+07	6.70354e+07	0.417154	0.0158081
Q00262	Stx2	Syntaxin-2 OS=Mus musculus GN=Stx2 PE=1 SV=1	1.72615e+06	1.70551e+06	1.67472e+06	2.28209e+06	1.63895e+06	2.11305e+06	2.13642e+06	1.73907e+06	1.80604e+06	1.90376e+06	0.259576	0.453596
Q00420-3	Gabpb1	Isoform 2 of GA-binding protein subunit beta-1 OS=Mus musculus GN=Gabpb1	435728	497735	513955	443391	406144	560860	596769	527552	571230	497932	0.549418	0.0426183
Q00422	Gabpa	GA-binding protein alpha chain OS=Mus musculus GN=Gabpa PE=1 SV=2	961297	874289	977228	875762	880210	796046	715083	806512	786723	749412	-0.291556	0.0172582
Q00493	Cpe	Carboxypeptidase E OS=Mus musculus GN=Cpe PE=1 SV=2	114890	126977	151752	156841	131950	108605	118091	115737	123712	117925	-0.272926	0.102806
Q00519	Xdh	Xanthine dehydrogenase/oxidase OS=Mus musculus GN=Xdh PE=1 SV=5	3.77385e+07	3.12779e+07	3.56786e+07	3.33318e+07	3.24439e+07	3.39857e+07	3.90293e+07	2.9386e+07	3.06547e+07	3.91021e+07	-0.0667115	0.965484
Q00558	F8a1	Factor VIII intron 22 protein OS=Mus musculus GN=F8a1 PE=2 SV=1	291752	282614	295058	247483	341391	359192	329133	352926	334988	327146	0.29211	0.0661483
Q00560	Il6st	Interleukin-6 receptor subunit beta OS=Mus musculus GN=Il6st PE=1 SV=2	195499	180945	236860	225827	219251	160031	154249	186796	182446	194435	-0.429382	0.0698143
Q00612	G6pdx	Glucose-6-phosphate 1-dehydrogenase X OS=Mus musculus GN=G6pdx PE=1 SV=3	5.68636e+07	6.10313e+07	5.05706e+07	6.12105e+07	6.34347e+07	7.66957e+07	7.71922e+07	6.82521e+07	7.35635e+07	7.43516e+07	0.45331	0.0122087
Q00623	Apoa1	Apolipoprotein A-I OS=Mus musculus GN=Apoa1 PE=1 SV=2	1.14104e+08	1.35201e+08	1.28297e+08	1.37966e+08	1.17794e+08	1.63388e+08	1.6681e+08	164815198	1.45131e+08	1.90278e+08	0.531487	0.0135929
Q00651	Itga4	Integrin alpha-4 OS=Mus musculus GN=Itga4 PE=1 SV=1	439518	411760	408732	451910	419706	390288	414351	413848	363499	363333	-0.175703	0.1228
Q00724	Rbp4	Retinol-binding protein 4 OS=Mus musculus GN=Rbp4 PE=2 SV=2	4.52414e+06	4.84899e+06	4.21133e+06	4.96496e+06	4.62639e+06	5.75066e+06	5.58847e+06	5.34369e+06	5.01269e+06	5.61268e+06	0.415865	0.0246709
Q00897	Serpina1d	Alpha-1-antitrypsin 1-4 OS=Mus musculus GN=Serpina1d PE=2 SV=1	2.4545e+07	2.4671e+07	2.56048e+07	2.75506e+07	2.19919e+07	3.06992e+07	2.40455e+07	2.84506e+07	2.54131e+07	2.71599e+07	0.195057	0.283594
Q00898	Serpina1e	Alpha-1-antitrypsin 1-5 OS=Mus musculus GN=Serpina1e PE=1 SV=1	107464836	1.05172e+08	8.73955e+07	1.20224e+08	7.23387e+07	6.36931e+07	5.55956e+07	1.11715e+08	6.43166e+07	7.84789e+07	-1.1235	0.155726
Q00915	Rbp1	Retinol-binding protein 1 OS=Mus musculus GN=Rbp1 PE=2 SV=2	4.86489e+06	3.93073e+06	4.78862e+06	4.15172e+06	3.1648e+06	3.81284e+06	3.56593e+06	3.63695e+06	3.39338e+06	3.62917e+06	-0.356669	0.220257
Q00PI9	Hnrnpul2	Heterogeneous nuclear ribonucleoprotein U-like protein 2 OS=Mus musculus GN=Hnrnpul2 PE=1 SV=2	4.72055e+06	4.0812e+06	4.98349e+06	3.41536e+06	4.3885e+06	3.96743e+06	3.79118e+06	3.80943e+06	4.1583e+06	3.65884e+06	-0.336213	0.299622
Q01065	Pde1b	"Calcium/calmodulin-dependent 3',5'-cyclic nucleotide phosphodiesterase 1B OS=Mus musculus GN=Pde1b PE=1 SV=2"	94639	92889.3	109347	96089.6	108478	101740	105142	102016	103169	100883	0.116779	0.674735
Q01102	Selp	P-selectin OS=Mus musculus GN=Selp PE=1 SV=1	537280	539911	538930	608734	517086	497925	527376	516637	518776	509226	-0.107098	0.223203
Q01147	Creb1	Isoform 2 of Cyclic AMP-responsive element-binding protein 1 OS=Mus musculus GN=Creb1	245868	237578	270606	242255	249367	203530	207048	206485	215128	215557	-0.418289	0.0100351
Q01149	Col1a2	Collagen alpha-2(I) chain OS=Mus musculus GN=Col1a2 PE=2 SV=2	2.67092e+06	2.00041e+06	2.24227e+06	2.16476e+06	1.9007e+06	1.90574e+06	1.74445e+06	1.87578e+06	2.10729e+06	1.44678e+06	-0.380343	0.118226
Q01279	Egfr	Epidermal growth factor receptor OS=Mus musculus GN=Egfr PE=1 SV=1	9.40482e+06	9.01139e+06	8.95218e+06	9.98649e+06	8.22694e+06	7.81146e+06	7.56184e+06	8.59453e+06	8.13269e+06	8.32422e+06	-0.238413	0.0754752
Q01339	Apoh	Beta-2-glycoprotein 1 OS=Mus musculus GN=Apoh PE=1 SV=1	1.08462e+07	1.15398e+07	1.13527e+07	1.15427e+07	1.07587e+07	1.23394e+07	1.24502e+07	1.06033e+07	1.01122e+07	1.18948e+07	0.104707	0.771083
Q01341	Adcy6	Adenylate cyclase type 6 OS=Mus musculus GN=Adcy6 PE=1 SV=1	719646	646328	764252	778758	753077	662610	623926	775614	664968	714463	-0.295893	0.395951
Q01405	Sec23a	Protein transport protein Sec23A OS=Mus musculus GN=Sec23a PE=1 SV=2	6.33282e+06	6.47824e+06	6.58637e+06	6.47803e+06	6.57113e+06	6.65883e+06	6.81431e+06	6.59975e+06	6.42722e+06	6.58293e+06	0.00780582	0.615252
Q01705-4	Notch1	Isoform 2 of Neurogenic locus notch homolog protein 1 OS=Mus musculus GN=Notch1	161745	166292	181857	172065	205121	170960	159717	154655	153119	159615	-0.213252	0.1517
Q01721	Gas1	Growth arrest-specific protein 1 OS=Mus musculus GN=Gas1 PE=2 SV=2	228980	209395	308733	233795	263542	199103	186571	266777	275165	254661	0.172745	0.707572
Q01730	Rsu1	Ras suppressor protein 1 OS=Mus musculus GN=Rsu1 PE=2 SV=3	6.45105e+06	6.28901e+06	6.96826e+06	7.58702e+06	7.37633e+06	7.05441e+06	6.39155e+06	7.38489e+06	6.64235e+06	7.28544e+06	0.0292281	0.965514
Q01755	Tcp11	T-complex protein 11 OS=Mus musculus GN=Tcp11 PE=2 SV=1	293132	369513	264840	1.39444e+06	219009	245794	249623	251895	270993	244642	-0.591973	0.320002
Q01768	Nme2	Nucleoside diphosphate kinase B OS=Mus musculus GN=Nme2 PE=1 SV=1	1.86929e+07	1.94027e+07	1.40334e+07	1.96152e+07	1.5238e+07	3.15081e+07	3.11804e+07	2.13331e+07	2.14765e+07	2.40867e+07	0.57281	0.0279999
Q01853	Vcp	Transitional endoplasmic reticulum ATPase OS=Mus musculus GN=Vcp PE=1 SV=4	9.52439e+07	7.68149e+07	8.23707e+07	4.74103e+07	7.29758e+07	1.02518e+08	1.11411e+08	8.32423e+07	8.97547e+07	100010595	0.565157	0.113705
Q02013	Aqp1	Aquaporin-1 OS=Mus musculus GN=Aqp1 PE=1 SV=3	1.57617e+06	1.18839e+06	1.56202e+06	1.34756e+06	1.41057e+06	1.12055e+06	1.33244e+06	1.06093e+06	1.34291e+06	1.164e+06	-0.453071	0.114055
Q02053	Uba1	Ubiquitin-like modifier-activating enzyme 1 OS=Mus musculus GN=Uba1 PE=1 SV=1	3.94256e+07	4.39687e+07	3.96953e+07	4.34033e+07	3.81125e+07	4.5903e+07	4.72101e+07	4.31683e+07	42376803	4.31524e+07	0.182114	0.166789
Q02105	C1qc	Complement C1q subcomponent subunit C OS=Mus musculus GN=C1qc PE=2 SV=2	2.1662e+06	2.12261e+06	2.09413e+06	2.10387e+06	2.28132e+06	2.2572e+06	2.13064e+06	2.02656e+06	2.24541e+06	2.24876e+06	0.109742	0.810953
Q02248	Ctnnb1	Catenin beta-1 OS=Mus musculus GN=Ctnnb1 PE=1 SV=1	6.04875e+06	3.93058e+06	5.42058e+06	2.85264e+06	4.23129e+06	4.0484e+06	4.75734e+06	4.15465e+06	4.93866e+06	4.18006e+06	-0.0489877	0.956541
Q02257	Jup	Junction plakoglobin OS=Mus musculus GN=Jup PE=1 SV=3	1.94924e+06	1.45023e+06	1.7423e+06	1.32018e+06	1.75312e+06	1.76146e+06	1.92632e+06	1.81073e+06	2.17862e+06	2.05405e+06	0.228132	0.127005
Q02357-3	Ank1	Isoform Er3 of Ankyrin-1 OS=Mus musculus GN=Ank1	1.47586e+07	1.61644e+07	1.78785e+07	1.40088e+07	1.79389e+07	1.59529e+07	1.92295e+07	1.69296e+07	1.60563e+07	1.82703e+07	0.0949014	0.421057
Q02384	Sos2	Son of sevenless homolog 2 OS=Mus musculus GN=Sos2 PE=1 SV=2	61771.4	61815.5	64192.8	63725.2	79525.5	51821.5	60534	58697.3	60455.5	62669	-0.146012	0.174667
Q02780	Nfia	Nuclear factor 1 A-type OS=Mus musculus GN=Nfia PE=1 SV=1	1.12801e+06	1.11828e+06	1.27828e+06	934221	1.33885e+06	937672	906910	1.50671e+06	1.10419e+06	1.03842e+06	-0.198752	0.675243
Q02788	Col6a2	Collagen alpha-2(VI) chain OS=Mus musculus GN=Col6a2 PE=2 SV=3	4.22139e+07	3.7773e+07	40012039	3.50324e+07	3.77386e+07	3.76436e+07	3.2558e+07	3.23576e+07	3.94032e+07	3.15259e+07	-0.363111	0.185274
Q02819	Nucb1	Nucleobindin-1 OS=Mus musculus GN=Nucb1 PE=1 SV=2	1.68357e+07	1.38461e+07	1.67897e+07	8.77492e+06	1.67173e+07	1.54455e+07	1.60476e+07	1.57105e+07	1.54268e+07	1.53116e+07	-0.170902	0.57836
Q02956	Prkcz	Protein kinase C zeta type OS=Mus musculus GN=Prkcz PE=1 SV=2	261902	263794	292433	219081	283991	219623	232644	234235	261670	256808	-0.279097	0.295501
Q03141	Mark3	Isoform 2 of MAP/microtubule affinity-regulating kinase 3 OS=Mus musculus GN=Mark3	1.26655e+06	960560	1.15592e+06	990859	1.10573e+06	1.09356e+06	1.10708e+06	1.13842e+06	1.1557e+06	1.04288e+06	-0.00776319	0.860931
Q03145	Epha2	Ephrin type-A receptor 2 OS=Mus musculus GN=Epha2 PE=1 SV=3	66800.4	65161	60383.4	64204.1	62580.4	63965.8	65220.6	60781.8	62805	72120.7	-0.0363693	0.778939
Q03173-4	Enah	Isoform 2 of Protein enabled homolog OS=Mus musculus GN=Enah	245257	173737	229137	199760	161324	157681	177625	140846	199165	163836	-0.524625	0.186511
Q03249	Galt	Galactose-1-phosphate uridylyltransferase OS=Mus musculus GN=Galt PE=2 SV=3	975250	1.00804e+06	1.14316e+06	1.15651e+06	1.1715e+06	746236	698398	881739	769717	752181	-0.957477	0.00516615
Q03265	Atp5a1	"ATP synthase subunit alpha, mitochondrial OS=Mus musculus GN=Atp5a1 PE=1 SV=1"	1.01214e+08	1.20819e+08	1.14595e+08	1.03111e+08	1.17628e+08	9.13107e+07	9.41523e+07	1.00415e+08	9.4725e+07	9.5442e+07	-0.418042	0.0332004
Q03311	Bche	Cholinesterase OS=Mus musculus GN=Bche PE=2 SV=2	3.12e+06	3.49187e+06	2.96509e+06	3.33733e+06	3.18684e+06	3.4454e+06	3.59081e+06	3.55362e+06	3.4487e+06	3.26057e+06	0.1647	0.192889
Q03734	Serpina3m	Serine protease inhibitor A3M OS=Mus musculus GN=Serpina3m PE=1 SV=2	1.0836e+07	1.39029e+07	1.14626e+07	1.29709e+07	1.00603e+07	2.04773e+07	1.97964e+07	1.28887e+07	1.20221e+07	1.57173e+07	0.720194	0.0908478
Q03958	Pfdn6	Prefoldin subunit 6 OS=Mus musculus GN=Pfdn6 PE=2 SV=1	1.75281e+06	1.78111e+06	1.87046e+06	1.80838e+06	1.55812e+06	1.73153e+06	1.76129e+06	1.66962e+06	1.7351e+06	1.72745e+06	-0.0682138	0.797255
Q03963	Eif2ak2	"Interferon-induced, double-stranded RNA-activated protein kinase OS=Mus musculus GN=Eif2ak2 PE=1 SV=2"	82070.9	76363	103934	100614	112725	77748.5	73513.6	87977	87236.5	77843	-0.653353	0.178324
Q04207-2	Rela	Isoform p65 delta of Transcription factor p65 OS=Mus musculus GN=Rela	2.43227e+06	2.63819e+06	2.99099e+06	2.10181e+06	3.3334e+06	2.30346e+06	2.19051e+06	2.54982e+06	2.55157e+06	2.54265e+06	-0.087281	0.415269
Q04447	Ckb	Creatine kinase B-type OS=Mus musculus GN=Ckb PE=1 SV=1	2.81048e+07	1.86231e+07	2.52544e+07	1.95203e+07	1.54888e+07	1.86316e+07	2.61988e+07	1.54328e+07	2.16373e+07	1.98995e+07	-0.0373248	0.833513
Q04519	Smpd1	Sphingomyelin phosphodiesterase OS=Mus musculus GN=Smpd1 PE=2 SV=2	436486	415828	465871	457338	311880	432330	509379	417627	406237	408057	-0.111899	0.693271
Q04690-2	Nf1	Isoform 1 of Neurofibromin OS=Mus musculus GN=Nf1	1.52215e+06	1.70211e+06	1.73951e+06	1.76966e+06	1.76107e+06	1.52929e+06	1.59241e+06	1.63326e+06	1.70576e+06	1.55871e+06	-0.198862	0.309881
Q04692	Smarcad1	SWI/SNF-related matrix-associated actin-dependent regulator of chromatin subfamily A containing DEAD/H box 1 OS=Mus musculus GN=Smarcad1 PE=1 SV=2	381540	322477	392524	260725	368301	342648	310502	337301	345431	296126	-0.209867	0.682784
Q04736	Yes1	Tyrosine-protein kinase Yes OS=Mus musculus GN=Yes1 PE=1 SV=3	600325	542745	541210	580233	538423	494744	492155	578521	596280	514776	-0.126798	0.483073
Q04750	Top1	DNA topoisomerase 1 OS=Mus musculus GN=Top1 PE=1 SV=2	1.30748e+06	872593	1.07289e+06	788080	1.16784e+06	1.21535e+06	1.15049e+06	1.16504e+06	1.20559e+06	1.27815e+06	0.240039	0.215583
Q04857	Col6a1	Collagen alpha-1(VI) chain OS=Mus musculus GN=Col6a1 PE=2 SV=1	7.89108e+07	4.45409e+07	4.39429e+07	4.01266e+07	5.27573e+07	5.47771e+07	5.43637e+07	3.54669e+07	7.05122e+07	3.34087e+07	0.287042	0.837134
Q05117	Acp5	Tartrate-resistant acid phosphatase type 5 OS=Mus musculus GN=Acp5 PE=2 SV=2	2.65204e+06	3.21996e+06	2.53382e+06	2.96794e+06	3.32591e+06	2.97378e+06	2.75244e+06	2.57161e+06	2.62087e+06	2.74542e+06	-0.219778	0.41144
Q05144	Rac2	Ras-related C3 botulinum toxin substrate 2 OS=Mus musculus GN=Rac2 PE=2 SV=1	198547	205376	253622	254754	194944	193619	198794	216604	208779	181896	-0.0794385	0.302093
Q05186	Rcn1	Reticulocalbin-1 OS=Mus musculus GN=Rcn1 PE=1 SV=1	3.5016e+06	1.64548e+06	3.29484e+06	1.56338e+06	2.77311e+06	3.80899e+06	3.51474e+06	3.25261e+06	3.22145e+06	3.26948e+06	0.357843	0.148412
Q05421	Cyp2e1	Cytochrome P450 2E1 OS=Mus musculus GN=Cyp2e1 PE=2 SV=1	6.26817e+07	6.87847e+07	5.49344e+07	5.70198e+07	5.51248e+07	36624896	3.97128e+07	4.33282e+07	3.90005e+07	4.24701e+07	-0.931477	0.00353934
Q05512	Mark2	Isoform 3 of Serine/threonine-protein kinase MARK2 OS=Mus musculus GN=Mark2	1.42314e+06	1.22451e+06	1.33022e+06	1.12259e+06	1.28489e+06	1.40108e+06	1.38645e+06	1.35733e+06	1.33588e+06	1.42095e+06	0.16124	0.212196
Q05685	Folr2	Folate receptor beta OS=Mus musculus GN=Folr2 PE=2 SV=1	1.94068e+06	2.2898e+06	2.00523e+06	2.17416e+06	2.34332e+06	2.17041e+06	1.87077e+06	2.21392e+06	1.98771e+06	1.96323e+06	-0.249189	0.472668
Q05793	Hspg2	Basement membrane-specific heparan sulfate proteoglycan core protein OS=Mus musculus GN=Hspg2 PE=1 SV=1	5.87085e+07	3.10829e+07	3.80232e+07	2.55498e+07	4.18114e+07	4.21693e+07	4.44799e+07	4.15598e+07	6.22853e+07	3.84837e+07	0.232196	0.391628
Q05816	Fabp5	"Fatty acid-binding protein, epidermal OS=Mus musculus GN=Fabp5 PE=1 SV=3"	3.48859e+07	3.78703e+07	3.00002e+07	3.30814e+07	3.66054e+07	5.06338e+07	5.6722e+07	4.22048e+07	4.36598e+07	5.168e+07	0.842913	0.00988232
Q05895	Thbs3	Thrombospondin-3 OS=Mus musculus GN=Thbs3 PE=1 SV=2	333657	315596	363310	348643	357614	287059	334866	328096	330580	333526	-0.171901	0.301472
Q05909	Ptprg	Receptor-type tyrosine-protein phosphatase gamma OS=Mus musculus GN=Ptprg PE=1 SV=1	234409	209131	185931	261769	179075	245646	268257	246404	241270	212541	0.374842	0.227889
Q05920	Pc	"Pyruvate carboxylase, mitochondrial OS=Mus musculus GN=Pc PE=1 SV=1"	1.02652e+08	1.82133e+08	1.25189e+08	9.259e+07	1.84561e+08	1.08676e+08	109461214	1.22405e+08	9.97269e+07	1.14537e+08	-0.31962	0.364756
Q05921	Rnasel	2-5A-dependent ribonuclease OS=Mus musculus GN=Rnasel PE=2 SV=2	2.82012e+06	2.54339e+06	2.46055e+06	2.95501e+06	2.56909e+06	3.13164e+06	3.07944e+06	2.76076e+06	2.969e+06	2.95465e+06	0.30409	0.0976378
Q05BC3-2	Eml1	Isoform 2 of Echinoderm microtubule-associated protein-like 1 OS=Mus musculus GN=Eml1	631521	599102	649340	617980	682305	552817	559510	623423	564263	581266	-0.262576	0.084365
Q05D44	Eif5b	Eukaryotic translation initiation factor 5B OS=Mus musculus GN=Eif5b PE=1 SV=2	4.53235e+06	4.66206e+06	4.10319e+06	4.16589e+06	4.38079e+06	5.60452e+06	5.54621e+06	4.78895e+06	5.02228e+06	5.25269e+06	0.398246	0.0182688
Q06138	Cab39	Calcium-binding protein 39 OS=Mus musculus GN=Cab39 PE=1 SV=2	5.25518e+06	4.85895e+06	5.10932e+06	5.08902e+06	4.83537e+06	5.6149e+06	5.29059e+06	4.83097e+06	4.91734e+06	4.9702e+06	-0.0660748	0.757527
Q06180	Ptpn2	Isoform 2 of Tyrosine-protein phosphatase non-receptor type 2 OS=Mus musculus GN=Ptpn2	157389	142231	161417	149048	138416	102451	107219	139545	136858	126883	-0.420979	0.0573791
Q06185	Atp5i	"ATP synthase subunit e, mitochondrial OS=Mus musculus GN=Atp5i PE=1 SV=2"	5.37008e+06	6.37508e+06	6.21744e+06	5.21241e+06	8.15413e+06	5.27766e+06	5.17688e+06	5.40221e+06	5.0854e+06	5.23022e+06	-0.393732	0.142591
Q06335	Aplp2	Isoform 2 of Amyloid-like protein 2 OS=Mus musculus GN=Aplp2	1.51949e+06	1.41118e+06	1.73987e+06	1.25704e+06	1.68497e+06	1.56915e+06	1.62796e+06	1.67204e+06	1.56423e+06	1.69722e+06	0.155617	0.406764
Q06770	Serpina6	Corticosteroid-binding globulin OS=Mus musculus GN=Serpina6 PE=1 SV=1	4.78827e+06	5.45379e+06	6.49674e+06	6.22171e+06	5.10753e+06	7.31937e+06	6.93167e+06	5.47801e+06	6.20839e+06	6.17204e+06	0.290711	0.202772
Q06806	Tie1	Tyrosine-protein kinase receptor Tie-1 OS=Mus musculus GN=Tie1 PE=2 SV=3	199022	301868	221422	223484	224591	209617	195168	179475	233848	190715	-0.353851	0.214258
Q06890	Clu	Clusterin OS=Mus musculus GN=Clu PE=1 SV=1	1.29835e+07	9.25136e+06	1.16625e+07	9.55577e+06	6.87484e+06	9.48102e+06	1.10364e+07	8.44231e+06	1.05102e+07	8.64551e+06	-0.0486553	0.879766
Q07076	Anxa7	Annexin A7 OS=Mus musculus GN=Anxa7 PE=2 SV=2	9.0978e+06	9.29887e+06	9.78112e+06	9.61076e+06	1.05009e+07	1.00674e+07	1.01894e+07	9.88453e+06	1.02622e+07	1.02337e+07	0.110242	0.311562
Q07113	Igf2r	Cation-independent mannose-6-phosphate receptor OS=Mus musculus GN=Igf2r PE=1 SV=1	7.59591e+06	8.22332e+06	9.55882e+06	8.06027e+06	8.84945e+06	8.52786e+06	9.16581e+06	7.30508e+06	7587951	9.37123e+06	0.0349547	0.926208
Q07235	Serpine2	Glia-derived nexin OS=Mus musculus GN=Serpine2 PE=2 SV=2	2.24959e+06	7.64164e+06	2.10286e+06	2.98464e+07	3.07221e+06	2.36538e+06	2.41761e+06	2.29548e+06	2.23902e+06	2.39405e+06	-0.699929	0.239059
Q07417	Acads	"Short-chain specific acyl-CoA dehydrogenase, mitochondrial OS=Mus musculus GN=Acads PE=1 SV=2"	1.69718e+07	1.80752e+07	1.67861e+07	1.71337e+07	1.99197e+07	18279319	1.79685e+07	1.90933e+07	1.79299e+07	1.98253e+07	0.134572	0.423037
Q07456	Ambp	Protein AMBP OS=Mus musculus GN=Ambp PE=2 SV=2	7.06886e+06	8.21807e+06	1.14394e+07	9.88273e+06	1.24935e+07	4.23105e+06	4.59145e+06	7.88719e+06	5.43683e+06	6.91462e+06	-1.45636	0.0328123
Q07646	Mest	Isoform 2 of Mesoderm-specific transcript protein OS=Mus musculus GN=Mest	2.04761e+06	1.74454e+06	1.98523e+06	1.95999e+06	1.68775e+06	2.81501e+06	3.50462e+06	2.59145e+06	2.55897e+06	2.37103e+06	0.649977	0.0104985
Q07797	Lgals3bp	Galectin-3-binding protein OS=Mus musculus GN=Lgals3bp PE=1 SV=1	5.24885e+06	4.52206e+06	5.0573e+06	4.0755e+06	4.39103e+06	4.41329e+06	4.33439e+06	4.77044e+06	4.35962e+06	4.11118e+06	-0.0901053	0.473838
Q07813	Bax	Apoptosis regulator BAX OS=Mus musculus GN=Bax PE=1 SV=1	1.10508e+06	1.28585e+06	1.30846e+06	1.27671e+06	1.36381e+06	1.3611e+06	1.45625e+06	1.29986e+06	1.28982e+06	1.37649e+06	0.124022	0.284416
Q07968	F13b	Coagulation factor XIII B chain OS=Mus musculus GN=F13b PE=1 SV=2	3.84049e+06	4.40385e+06	4.1276e+06	4.65978e+06	4.56401e+06	4.57517e+06	4.06414e+06	4.43532e+06	4.63768e+06	4.7951e+06	0.0909312	0.537865
Q08024	Cbfb	Core-binding factor subunit beta OS=Mus musculus GN=Cbfb PE=1 SV=1	131263	110962	128739	104898	105837	132098	106587	111528	107068	119759	0.00421863	0.950296
Q08091	Cnn1	Calponin-1 OS=Mus musculus GN=Cnn1 PE=2 SV=1	7.81116e+06	3.93051e+06	6.36071e+06	4.88187e+06	4.60374e+06	3.73342e+06	5.60873e+06	5.91101e+06	3.73464e+06	4.43678e+06	-0.26168	0.459575
Q08093	Cnn2	Calponin-2 OS=Mus musculus GN=Cnn2 PE=1 SV=1	4.01071e+06	3.78955e+06	3.5951e+06	4.24004e+06	3.09194e+06	3.86609e+06	3.74428e+06	3.96866e+06	3.24686e+06	3.72145e+06	-0.025999	0.954447
Q08122	Tle3	Isoform 1 of Transducin-like enhancer protein 3 OS=Mus musculus GN=Tle3	584288	549923	486311	574127	466539	603037	576401	539656	526932	552124	0.0102903	0.479606
Q08376	Zbtb14	Zinc finger and BTB domain-containing protein 14 OS=Mus musculus GN=Zbtb14 PE=2 SV=1	62685.8	62857.7	91521.5	56782	97386.8	16250.7	13238.8	70401.1	56932.6	39005.8	-1.25627	0.094108
Q08481	Pecam1	Platelet endothelial cell adhesion molecule OS=Mus musculus GN=Pecam1 PE=1 SV=1	3.90663e+06	2.85822e+06	2.89513e+06	2.97307e+06	3.12829e+06	3.27843e+06	3.66363e+06	2.87735e+06	2.78587e+06	3.69145e+06	0.134027	0.781093
Q08509	Eps8	Epidermal growth factor receptor kinase substrate 8 OS=Mus musculus GN=Eps8 PE=1 SV=2	1.27158e+06	1.26824e+06	1.27197e+06	1.3765e+06	1.17137e+06	1.16711e+06	1.19417e+06	1.10119e+06	1.15718e+06	1.18659e+06	-0.195576	0.0984301
Q08639	Tfdp1	Transcription factor Dp-1 OS=Mus musculus GN=Tfdp1 PE=1 SV=1	34266	28650.4	30650.3	29744.1	34627.8	28616.5	25349.5	25999.4	26010.9	27868.8	-0.401573	0.0383682
Q08761	Pros1	Vitamin K-dependent protein S OS=Mus musculus GN=Pros1 PE=2 SV=1	857645	936613	925675	760497	850246	1.02794e+06	1.0813e+06	994270	916268	955692	0.313559	0.0692766
Q08857	Cd36	Platelet glycoprotein 4 OS=Mus musculus GN=Cd36 PE=1 SV=2	108822087	1.07272e+08	8.89267e+07	1.05944e+08	9.3601e+07	9.80744e+07	1.07397e+08	1.12391e+08	1.03476e+08	1.27262e+08	0.00491958	0.33124
Q08874-7	Mitf	Isoform A1 of Microphthalmia-associated transcription factor OS=Mus musculus GN=Mitf	348861	340326	374132	202792	331261	347526	348211	311169	326945	335698	-0.0281882	0.671736
Q08879-2	Fbln1	Isoform C of Fibulin-1 OS=Mus musculus GN=Fbln1	1.36989e+06	1.68672e+06	1.38068e+06	1.58648e+06	1.54552e+06	1.48255e+06	1.88224e+06	1.77344e+06	1.7788e+06	1.88142e+06	0.283351	0.0958742
Q08879	Fbln1	Fibulin-1 OS=Mus musculus GN=Fbln1 PE=1 SV=2	2.2732e+06	2.48281e+06	2.59441e+06	2.38968e+06	2.45844e+06	2.33024e+06	2.54384e+06	2.4545e+06	2.52275e+06	2.45067e+06	-0.0196818	0.869209
Q08943	Ssrp1	Isoform 2 of FACT complex subunit SSRP1 OS=Mus musculus GN=Ssrp1	508678	281881	415464	234532	430285	352031	273751	366255	413635	349034	-0.354345	0.888522
Q08AT1	Rasl12	Ras-like protein family member 12 OS=Mus musculus GN=Rasl12 PE=2 SV=1	628749	744214	666834	737662	649367	605172	619430	554681	564380	591831	-0.276842	0.0365598
Q09014	Ncf1	Neutrophil cytosol factor 1 OS=Mus musculus GN=Ncf1 PE=2 SV=3	1.3588e+06	1.37018e+06	1.30481e+06	1.67471e+06	1.23405e+06	1.65042e+06	1.52581e+06	1.29718e+06	1.36011e+06	1.3182e+06	-0.0101786	0.764501
Q09098	Pate4	Prostate and testis expressed protein 4 OS=Mus musculus GN=Pate4 PE=1 SV=3	4.96875e+06	5.67524e+07	3.99671e+06	2.42737e+08	5.27938e+06	4.22822e+06	4.03485e+06	4.59143e+06	4.38846e+06	6.34143e+06	-0.532273	0.229518
Q09TK7	Spink11	Serine protease inhibitor Kazal-type 11 OS=Mus musculus GN=Spink11 PE=2 SV=2	168882	457424	144665	1.40825e+06	165359	170803	176161	175325	155062	177713	-0.113092	0.308055
Q09TK9	Spink8	Serine protease inhibitor Kazal-type 8 OS=Mus musculus GN=Spink8 PE=2 SV=1	37538.9	58694.8	34566.9	161308	53020	19587.3	41131.1	56720.8	45781.6	45586.2	-0.421971	0.371754
Q09XV5	Chd8	Chromodomain-helicase-DNA-binding protein 8 OS=Mus musculus GN=Chd8 PE=1 SV=1	398105	325286	402044	323198	434154	384855	367300	441844	400871	318564	-0.0705792	0.887669
Q0GNC1	Inf2	Isoform 2 of Inverted formin-2 OS=Mus musculus GN=Inf2	1.87169e+06	2.03099e+06	1.87173e+06	1.64719e+06	1.89988e+06	2.17902e+06	2.26341e+06	1.97422e+06	2.09041e+06	2.10247e+06	0.259839	0.0624767
Q0HA38	Ttc21b	Tetratricopeptide repeat protein 21B OS=Mus musculus GN=Ttc21b PE=2 SV=1	197349	156023	191793	188958	205523	190684	182632	163494	177116	186739	-0.115654	0.623951
Q0KL02-3	Trio	Isoform 3 of Triple functional domain protein OS=Mus musculus GN=Trio	419832	347789	436089	267978	436822	380885	397905	363292	370992	397212	-0.211055	0.907627
Q0P5W1-3	Vps8	Isoform 3 of Vacuolar protein sorting-associated protein 8 homolog OS=Mus musculus GN=Vps8	1.61951e+06	1.59464e+06	1.57632e+06	1.11919e+06	1.59305e+06	1.66178e+06	1.72494e+06	1.73314e+06	1.69045e+06	1.63032e+06	0.116854	0.209398
Q0P678	Zc3h18	Zinc finger CCCH domain-containing protein 18 OS=Mus musculus GN=Zc3h18 PE=1 SV=1	338967	275507	366382	318924	313817	281966	206186	331192	305013	243340	-0.327155	0.188086
Q0VEE6	Znf800	Zinc finger protein 800 OS=Mus musculus GN=Znf800 PE=1 SV=1	225031	150439	214964	125311	216955	164030	162795	176667	212113	165864	-0.568082	0.85027
Q0VG62	NA	Uncharacterized protein C8orf59 homolog OS=Mus musculus PE=2 SV=1	107780	105662	93105.2	103487	101387	135641	118996	101437	109390	116987	0.269235	0.124217
Q0VGB7	Ppp4r2	Serine/threonine-protein phosphatase 4 regulatory subunit 2 OS=Mus musculus GN=Ppp4r2 PE=1 SV=1	210968	186860	216057	186262	190786	177705	157801	174208	188159	167250	-0.226789	0.0633836
Q0VGY8	Tanc1	Protein TANC1 OS=Mus musculus GN=Tanc1 PE=2 SV=2	902167	880876	1.09508e+06	931287	1.05212e+06	821250	833564	858933	848143	864532	-0.257071	0.0653625
Q11011	Npepps	Puromycin-sensitive aminopeptidase OS=Mus musculus GN=Npepps PE=1 SV=2	1.72449e+07	1.72303e+07	1.67938e+07	1.92113e+07	1.58703e+07	1.92157e+07	1.98556e+07	1.80613e+07	1.84434e+07	1.81161e+07	0.145314	0.166831
Q11136	Pepd	Xaa-Pro dipeptidase OS=Mus musculus GN=Pepd PE=2 SV=3	4.27575e+06	4.31049e+06	4.48042e+06	4.54266e+06	4.82553e+06	4.60974e+06	4.43074e+06	4.53731e+06	4.32689e+06	4.26151e+06	-0.026894	0.826136
Q148V7	Kiaa1468	LisH domain and HEAT repeat-containing protein KIAA1468 OS=Mus musculus GN=Kiaa1468 PE=1 SV=1	1.71177e+06	1.77257e+06	1.85922e+06	1.43306e+06	1.88729e+06	1.69941e+06	1.64206e+06	1.69672e+06	1.83183e+06	1.85743e+06	-0.0940944	0.904099
Q149F3	Gspt2	Eukaryotic peptide chain release factor GTP-binding subunit ERF3B OS=Mus musculus GN=Gspt2 PE=1 SV=1	178145	140320	195268	142584	153275	125140	116610	138893	144147	137197	-0.26657	0.0815006
Q149L6	Dnajb14	DnaJ homolog subfamily B member 14 OS=Mus musculus GN=Dnajb14 PE=2 SV=1	300758	328515	422353	387739	436295	263699	262624	332167	279428	268337	-0.923165	0.036885
Q14AM7	NA	UPF0472 protein C16orf72 homolog OS=Mus musculus PE=2 SV=1	26888.4	27008.2	36609.5	27594.6	30943.6	49288.8	55940.6	36017.6	37947.3	24534.3	0.846777	0.177996
Q14C51	Ptcd3	"Pentatricopeptide repeat domain-containing protein 3, mitochondrial OS=Mus musculus GN=Ptcd3 PE=2 SV=2"	1.89927e+06	1.2512e+06	1.34901e+06	1.13152e+06	1.85681e+06	1.47148e+06	1.89266e+06	1.32829e+06	1.3363e+06	1.41114e+06	0.103085	0.972638
Q14CH1	Mocos	Molybdenum cofactor sulfurase OS=Mus musculus GN=Mocos PE=2 SV=1	424408	462175	459146	524457	484958	461663	475342	459748	449132	466868	-3.66e-05	0.79951
Q14CH7	Aars2	"Alanine--tRNA ligase, mitochondrial OS=Mus musculus GN=Aars2 PE=2 SV=1"	481095	477176	510902	516249	519273	441924	425087	452407	446593	411172	-0.323377	0.0193755
Q14DH7	Acss3	"Acyl-CoA synthetase short-chain family member 3, mitochondrial OS=Mus musculus GN=Acss3 PE=1 SV=2"	7.69403e+06	8.31645e+06	6.99184e+06	7.80234e+06	7.87759e+06	7.87785e+06	7.9605e+06	8.22823e+06	7.43468e+06	7.54936e+06	-0.00740743	0.866126
Q1ERP8-3	Cd300lg	Isoform 2 of CMRF35-like molecule 9 OS=Mus musculus GN=Cd300lg	3.25051e+06	3.72825e+06	3.65649e+06	3.74374e+06	4.00589e+06	2.75953e+06	2.90166e+06	3.30307e+06	3.03598e+06	3.93951e+06	-0.469225	0.146222
Q1HFZ0	Nsun2	tRNA (cytosine(34)-C(5))-methyltransferase OS=Mus musculus GN=Nsun2 PE=1 SV=2	1.28742e+06	1.464e+06	1.35301e+06	1.97919e+06	1.36769e+06	1.36079e+06	1.39434e+06	1.37892e+06	1.33967e+06	1.2968e+06	-0.0291476	0.433185
Q1W617	Shroom4	Isoform 2 of Protein Shroom4 OS=Mus musculus GN=Shroom4	211425	200064	208538	176193	213333	205452	205078	195606	220415	200774	-0.0362262	0.776572
Q2EMV9	Parp14	Poly [ADP-ribose] polymerase 14 OS=Mus musculus GN=Parp14 PE=1 SV=3	1.33572e+06	1.30891e+06	1.4902e+06	1.39617e+06	1.35574e+06	1.29249e+06	1.32811e+06	1.28177e+06	1.34539e+06	1.30535e+06	-0.100362	0.298191
Q2HXL6	Edem3	ER degradation-enhancing alpha-mannosidase-like protein 3 OS=Mus musculus GN=Edem3 PE=1 SV=2	1.2147e+06	1.19195e+06	1.29281e+06	1.18906e+06	1.37194e+06	1.29658e+06	1.18869e+06	1.21187e+06	1.18847e+06	1.26507e+06	-0.0196582	0.775189
Q2KHK3	Aqpep	Aminopeptidase Q OS=Mus musculus GN=Aqpep PE=2 SV=3	142115	144616	117776	138503	114869	94479.2	101377	125748	122512	110318	-0.571737	0.10622
Q2KN98	Specc1l	Cytospin-A OS=Mus musculus GN=Specc1l PE=1 SV=1	635271	503023	561733	432770	542754	567155	581538	522199	644700	531141	0.0898238	0.510653
Q2NL51	Gsk3a	Glycogen synthase kinase-3 alpha OS=Mus musculus GN=Gsk3a PE=1 SV=2	571270	643552	662341	692889	627495	624044	661991	593491	631815	629119	-0.0512134	0.792568
Q2TBA3	Malt1	Isoform 2 of Mucosa-associated lymphoid tissue lymphoma translocation protein 1 homolog OS=Mus musculus GN=Malt1	566464	572447	650324	484473	613866	644402	668064	624170	656599	644747	0.277716	0.125698
Q2TBE6	Pi4k2a	Phosphatidylinositol 4-kinase type 2-alpha OS=Mus musculus GN=Pi4k2a PE=1 SV=1	1.38129e+06	1.46367e+06	1.47469e+06	1.66197e+06	1.45917e+06	1.47167e+06	1.46992e+06	1.54426e+06	1.3444e+06	1.495e+06	0.00750526	0.819486
Q2TPA8	Hsdl2	Hydroxysteroid dehydrogenase-like protein 2 OS=Mus musculus GN=Hsdl2 PE=1 SV=1	1.89861e+07	2.09605e+07	1.81512e+07	1.99592e+07	2.13504e+07	2.14535e+07	2.18813e+07	2.16276e+07	2.25851e+07	2.23354e+07	0.193262	0.0810469
Q2VLH6-2	Cd163	Isoform 2 of Scavenger receptor cysteine-rich type 1 protein M130 OS=Mus musculus GN=Cd163	7.7774e+06	8.25553e+06	7.8477e+06	8.81225e+06	8.68439e+06	7.72684e+06	8.89449e+06	8.16267e+06	7.75258e+06	8.06538e+06	-0.053352	0.758896
Q2VPQ9-2	Meaf6	Isoform 2 of Chromatin modification-related protein MEAF6 OS=Mus musculus GN=Meaf6	18385.1	18789.7	23074.3	11852.5	18913.5	18664.7	20523.5	17506.6	25998.2	16152.4	-0.0148844	0.620915
Q2YDW2	Msto1	Protein misato homolog 1 OS=Mus musculus GN=Msto1 PE=2 SV=1	1.15216e+06	1.09656e+06	1.12078e+06	1.26733e+06	1.07492e+06	1.15353e+06	1.16434e+06	1.13868e+06	1.1371e+06	1.11058e+06	0.0214017	0.995902
Q31125	Slc39a7	Zinc transporter SLC39A7 OS=Mus musculus GN=Slc39a7 PE=1 SV=2	704216	692219	607723	687763	506527	678203	702181	715383	704332	682940	0.0254691	0.299106
Q32NY4	Cnnm3	Isoform 2 of Metal transporter CNNM3 OS=Mus musculus GN=Cnnm3	258632	187533	182499	232950	193857	213409	201025	188915	195946	213987	0.0647808	0.759747
Q32Q92	Acot6	Acyl-coenzyme A thioesterase 6 OS=Mus musculus GN=Acot6 PE=1 SV=1	215895	210533	233811	210386	214813	230944	210134	193590	185170	212305	-0.0616713	0.42403
Q3B7Z2	Osbp	Oxysterol-binding protein 1 OS=Mus musculus GN=Osbp PE=1 SV=3	7.14109e+06	7.67195e+06	6.87177e+06	7.58373e+06	6.81126e+06	7.61576e+06	7.57346e+06	7.06416e+06	7.52396e+06	7.11683e+06	0.101701	0.664611
Q3KNM2	Mar-05	E3 ubiquitin-protein ligase MARCH5 OS=Mus musculus GN=March5 PE=2 SV=1	818884	739949	822845	859002	839053	845338	790308	852426	826980	823465	6.8e-06	0.780464
Q3LAC4	Prex2	"Phosphatidylinositol 3,4,5-trisphosphate-dependent Rac exchanger 2 protein OS=Mus musculus GN=Prex2 PE=2 SV=2"	50345.1	45310.4	60610.4	45596.3	59150	41732.2	34181.3	53589.1	36233.3	46878.8	-0.453251	0.142029
Q3SXD3	Hddc2	HD domain-containing protein 2 OS=Mus musculus GN=Hddc2 PE=2 SV=1	1.41213e+06	1.32413e+06	1.39198e+06	1.48031e+06	1.12527e+06	1.31135e+06	1.37946e+06	1.26804e+06	1.27285e+06	1.19336e+06	-0.206842	0.574785
Q3TA38	Tmem120b	Transmembrane protein 120B OS=Mus musculus GN=Tmem120b PE=2 SV=1	1.25569e+06	1.55104e+06	1.26568e+06	1.35776e+06	1.56572e+06	1.55599e+06	1.53121e+06	1.53091e+06	1.50316e+06	1.65986e+06	0.28707	0.15278
Q3TAA7	Stk11ip	Serine/threonine-protein kinase 11-interacting protein OS=Mus musculus GN=Stk11ip PE=1 SV=1	72143.6	65650.6	79911.6	62911	72218.4	73398	85240.2	72752	82242	75914.7	0.115104	0.196052
Q3TAP4	Ap5b1	AP-5 complex subunit beta-1 OS=Mus musculus GN=Ap5b1 PE=2 SV=1	224275	213779	289257	230476	270274	256397	202439	325289	248328	215660	0.144725	0.955251
Q3TAS6-2	Emc10	Isoform 2 of ER membrane protein complex subunit 10 OS=Mus musculus GN=Emc10	676999	698107	559026	834608	556725	681086	646793	646482	618007	632556	-0.116097	0.86857
Q3TB82	Plekhf1	Pleckstrin homology domain-containing family F member 1 OS=Mus musculus GN=Plekhf1 PE=2 SV=1	362444	382693	331725	329277	309748	352802	287738	357112	367328	371937	0.14883	0.911838
Q3TBD2	Hmha1	Minor histocompatibility protein HA-1 OS=Mus musculus GN=Hmha1 PE=1 SV=2	1.26939e+06	1.08317e+06	1.18361e+06	854417	1.11433e+06	1.23148e+06	1.29864e+06	1.19509e+06	1.11901e+06	1.16321e+06	0.129831	0.340431
Q3TBT3	Tmem173	Isoform 2 of Stimulator of interferon genes protein OS=Mus musculus GN=Tmem173	1.14864e+06	1.17042e+06	1.14853e+06	1.18195e+06	1.16663e+06	1.08834e+06	1.10926e+06	1.08321e+06	1.05162e+06	1.07632e+06	-0.184505	0.0733526
Q3TBW2	Mrpl10	"39S ribosomal protein L10, mitochondrial OS=Mus musculus GN=Mrpl10 PE=2 SV=2"	1.92253e+06	1.7343e+06	1.25721e+06	817653	1.36425e+06	3.12021e+06	3.62971e+06	1.75217e+06	1.93448e+06	2.01952e+06	0.945098	0.0617298
Q3TC46	Patl1	Protein PAT1 homolog 1 OS=Mus musculus GN=Patl1 PE=1 SV=2	95275.3	93991.3	101249	94736.9	89862.5	91820.8	94562	93331.6	87074.7	92995	-0.0594623	0.485564
Q3TC72	Fahd2	Fumarylacetoacetate hydrolase domain-containing protein 2A OS=Mus musculus GN=Fahd2 PE=1 SV=1	2.1058e+06	2.37655e+06	2.27288e+06	2.38908e+06	2.38414e+06	2.1028e+06	2.10602e+06	2.15854e+06	2.1644e+06	2.19155e+06	-0.226941	0.15097
Q3TC93	Hs1bp3	HCLS1-binding protein 3 OS=Mus musculus GN=Hs1bp3 PE=1 SV=2	862033	788281	894226	856711	778014	857808	829781	859940	867877	805838	-0.0184676	0.847277
Q3TCH7	Cul4a	Cullin-4A OS=Mus musculus GN=Cul4a PE=1 SV=1	5.41065e+06	5.03362e+06	4.98322e+06	5.18169e+06	4.91365e+06	5.33906e+06	5.19516e+06	5.10241e+06	5.40303e+06	5.14511e+06	0.0742225	0.554386
Q3TCJ1	Fam175b	BRISC complex subunit Abro1 OS=Mus musculus GN=Fam175b PE=2 SV=1	679669	577209	661147	445149	625427	653256	626698	639452	665733	619403	0.0253815	0.449034
Q3TCN2	Plbd2	Putative phospholipase B-like 2 OS=Mus musculus GN=Plbd2 PE=1 SV=2	2.88209e+06	2.92396e+06	2.58002e+06	2.84019e+06	2.61994e+06	3.2546e+06	3.31624e+06	3.00873e+06	3.05302e+06	3.011e+06	0.130249	0.050728
Q3TDD9	Ppp1r21	Protein phosphatase 1 regulatory subunit 21 OS=Mus musculus GN=Ppp1r21 PE=2 SV=2	1.3524e+06	1.06126e+06	1.1539e+06	1.01016e+06	1.14803e+06	1.14433e+06	1.01468e+06	1.0675e+06	1.11805e+06	1.12408e+06	-0.0800892	0.59916
Q3TDK6	Rogdi	Isoform 2 of Protein rogdi homolog OS=Mus musculus GN=Rogdi	211259	200508	218752	208735	225527	175801	184239	196486	192090	188576	-0.277368	0.0328633
Q3TDN2	Faf2	FAS-associated factor 2 OS=Mus musculus GN=Faf2 PE=2 SV=2	2.86098e+06	2.91541e+06	2.8015e+06	3.20892e+06	2.78514e+06	3.09067e+06	3.25018e+06	2.97758e+06	2.96109e+06	2.98813e+06	0.0936831	0.374206
Q3TDQ1	Stt3b	Dolichyl-diphosphooligosaccharide--protein glycosyltransferase subunit STT3B OS=Mus musculus GN=Stt3b PE=1 SV=2	3.52674e+06	4.08175e+06	4.04136e+06	4.7516e+06	4.09599e+06	3.93867e+06	4.35334e+06	4.25419e+06	4.1268e+06	4.00322e+06	0.021538	0.881243
Q3TEA8	Hp1bp3	Isoform 2 of Heterochromatin protein 1-binding protein 3 OS=Mus musculus GN=Hp1bp3	6.54024e+06	2.99975e+06	6.22687e+06	2.91134e+06	5.03384e+06	5.14904e+06	5.15394e+06	4.92997e+06	5.85625e+06	4.49385e+06	0.0461445	0.585683
Q3TFQ1	Spryd7	SPRY domain-containing protein 7 OS=Mus musculus GN=Spryd7 PE=2 SV=2	934955	1.02626e+06	918455	1.27797e+06	989242	993350	1.13305e+06	1.06199e+06	997074	1.07007e+06	0.132711	0.780413
Q3TGF2	Fam107b	Protein FAM107B OS=Mus musculus GN=Fam107b PE=1 SV=2	102502	76847	69823.1	93056.4	54012.4	152986	150409	96065.5	116127	126671	1.2644	0.0291377
Q3TGW2	Eepd1	Endonuclease/exonuclease/phosphatase family domain-containing protein 1 OS=Mus musculus GN=Eepd1 PE=1 SV=1	6.18845e+06	5.81451e+06	5.66057e+06	6.439e+06	5.97383e+06	5.08564e+06	5.49157e+06	6.11615e+06	5.97287e+06	5.54641e+06	-0.183355	0.297518
Q3TH73	Ttyh2	Protein tweety homolog 2 OS=Mus musculus GN=Ttyh2 PE=2 SV=1	222746	219198	243449	254251	253417	231187	231997	277082	262465	230641	-0.116605	0.670502
Q3THE2	Myl12b	Myosin regulatory light chain 12B OS=Mus musculus GN=Myl12b PE=1 SV=2	1.30897e+06	1.36478e+06	1.4597e+06	1.18585e+06	1.71827e+06	1.49742e+06	1.40183e+06	1.56575e+06	1.50288e+06	1.47533e+06	0.207799	0.485497
Q3THG9	Aarsd1	Alanyl-tRNA editing protein Aarsd1 OS=Mus musculus GN=Aarsd1 PE=1 SV=2	1.05243e+06	1.0205e+06	1.06089e+06	1.77715e+06	938251	755002	701869	1.00826e+06	966979	784464	-0.735697	0.100399
Q3THK3	Gtf2f1	General transcription factor IIF subunit 1 OS=Mus musculus GN=Gtf2f1 PE=1 SV=2	62753.6	61825.6	55585.4	62567.1	57984	55067.4	66455.2	52118.1	60378.5	62650.4	-0.0643153	0.839523
Q3THK7	Gmps	GMP synthase [glutamine-hydrolyzing] OS=Mus musculus GN=Gmps PE=1 SV=2	6.44578e+06	6.25678e+06	6.61546e+06	7.42425e+06	5.998e+06	5.96546e+06	6.00892e+06	5.7756e+06	5.90604e+06	5.88652e+06	-0.205403	0.105806
Q3THS6	Mat2a	S-adenosylmethionine synthase isoform type-2 OS=Mus musculus GN=Mat2a PE=2 SV=2	5.74668e+06	6.25025e+06	6.27071e+06	6.57816e+06	6.09575e+06	5.89442e+06	5.72994e+06	5.62294e+06	5.64525e+06	5.58119e+06	-0.236539	0.0963953
Q3THW5	H2afz	Histone H2A.Z OS=Mus musculus GN=H2afz PE=1 SV=2	2.27986e+06	1.13958e+06	1.37517e+06	967084	1.35699e+06	1.18716e+06	1.36281e+06	1.39645e+06	2.10209e+06	936711	-0.0059454	0.973448
Q3TIR1-3	Trappc13	Isoform 2 of Trafficking protein particle complex subunit 13 OS=Mus musculus GN=Trappc13	1.22136e+06	1.09516e+06	1.26749e+06	1.06729e+06	1.22277e+06	1.15087e+06	1.06881e+06	1.23046e+06	1.22972e+06	1.17581e+06	-0.0843482	0.978203
Q3TIR3	Ric8a	Synembryn-A OS=Mus musculus GN=Ric8a PE=1 SV=2	285168	281196	318004	298065	334154	266117	253153	278587	276355	270564	-0.269572	0.0679721
Q3TIU4	Pde12	"2',5'-phosphodiesterase 12 OS=Mus musculus GN=Pde12 PE=2 SV=2"	1.67522e+06	1.52967e+06	1.91188e+06	1.62714e+06	1.56658e+06	1.43037e+06	1.44605e+06	1.61239e+06	1.69818e+06	1.47727e+06	-0.264881	0.288326
Q3TIV5	Zc3h15	Zinc finger CCCH domain-containing protein 15 OS=Mus musculus GN=Zc3h15 PE=1 SV=2	1.17199e+06	1.23376e+06	1.09761e+06	1.31169e+06	1.12108e+06	1.53852e+06	1.53102e+06	1.26702e+06	1.26333e+06	1.35658e+06	0.329995	0.0687366
Q3TIX9	Usp39	U4/U6.U5 tri-snRNP-associated protein 2 OS=Mus musculus GN=Usp39 PE=2 SV=2	410658	409251	440332	401632	415782	362947	384309	373539	406622	395745	-0.155079	0.122338
Q3TJ91	Llgl2	Lethal(2) giant larvae protein homolog 2 OS=Mus musculus GN=Llgl2 PE=1 SV=2	658354	630470	689818	695402	650319	611914	624709	584742	651743	614968	-0.159019	0.139201
Q3TJD7	Pdlim7	PDZ and LIM domain protein 7 OS=Mus musculus GN=Pdlim7 PE=2 SV=1	4.90672e+06	3.48467e+06	3.86084e+06	3.49261e+06	3.89527e+06	4.20561e+06	4.44765e+06	3.97808e+06	3.9668e+06	3.98032e+06	0.0637117	0.566717
Q3TJZ6	Fam98a	Protein FAM98A OS=Mus musculus GN=Fam98a PE=2 SV=1	1.48113e+06	948735	1.32694e+06	1.20009e+06	1.33431e+06	1.80621e+06	1.72457e+06	1.64418e+06	1.65012e+06	1.61843e+06	0.463907	0.0223945
Q3TKT4-2	Smarca4	Isoform 2 of Transcription activator BRG1 OS=Mus musculus GN=Smarca4	495933	497714	594237	424765	492761	403767	375428	460729	529009	478120	-0.175561	0.318446
Q3TKY6	Cwc27	Peptidyl-prolyl cis-trans isomerase CWC27 homolog OS=Mus musculus GN=Cwc27 PE=2 SV=1	115407	115341	121246	115304	94619.6	105364	97760.1	126054	105168	118970	-0.212821	0.870075
Q3TL44	Nlrx1	NLR family member X1 OS=Mus musculus GN=Nlrx1 PE=2 SV=1	4.59707e+06	4.47635e+06	5.04784e+06	4.5152e+06	4.94492e+06	4.33321e+06	3.87555e+06	4.32384e+06	4.26963e+06	4.3337e+06	-0.14935	0.0697513
Q3TLD5	Uri1	Unconventional prefoldin RPB5 interactor OS=Mus musculus GN=Uri1 PE=1 SV=2	506622	417827	401605	343207	419138	473978	473582	417859	423542	431667	0.0760894	0.474925
Q3TLH4	Prrc2c	Protein PRRC2C OS=Mus musculus GN=Prrc2c PE=1 SV=3	2.45055e+06	2.18813e+06	2.3002e+06	2.28325e+06	2.16631e+06	2.31177e+06	2.27711e+06	2.33128e+06	2.48649e+06	2.21396e+06	0.0142051	0.701075
Q3TLI0	Trappc10	Trafficking protein particle complex subunit 10 OS=Mus musculus GN=Trappc10 PE=1 SV=2	1.64598e+06	1.85438e+06	1.8062e+06	1.83554e+06	1.81336e+06	1.58219e+06	1.62121e+06	1.60766e+06	1.69273e+06	1.68198e+06	-0.267123	0.0826701
Q3TLP5-2	Echdc2	"Isoform 2 of Enoyl-CoA hydratase domain-containing protein 2, mitochondrial OS=Mus musculus GN=Echdc2"	1.7244e+06	2.01937e+06	1.81789e+06	1.72107e+06	1.72143e+06	1.44478e+06	1.61532e+06	1.47508e+06	1.65358e+06	1.43677e+06	-0.403913	0.0334126
Q3TLS3	Gdpgp1	GDP-D-glucose phosphorylase 1 OS=Mus musculus GN=Gdpgp1 PE=2 SV=2	180357	174477	163277	181201	193935	181540	177828	165545	170981	177534	-0.0369596	0.705469
Q3TMH2	Scrn3	Secernin-3 OS=Mus musculus GN=Scrn3 PE=1 SV=1	1.63615e+06	1.66999e+06	1.52936e+06	1.57758e+06	1.5943e+06	1.73579e+06	1.74561e+06	1.65462e+06	1.60434e+06	1.72036e+06	0.159424	0.226726
Q3TMV7	Pyroxd1	Pyridine nucleotide-disulfide oxidoreductase domain-containing protein 1 OS=Mus musculus GN=Pyroxd1 PE=2 SV=1	102287	87262.2	103644	94348.6	118839	83780	77022.1	95485.5	83148.2	90672	-0.462268	0.092733
Q3TMW1	Ccdc102a	Coiled-coil domain-containing protein 102A OS=Mus musculus GN=Ccdc102a PE=2 SV=2	24735.8	21211.5	24802.1	29072	23512.8	26630.5	25538.8	25992.5	22324.2	25249.3	0.0778208	0.803582
Q3TMX7	Qsox2	Sulfhydryl oxidase 2 OS=Mus musculus GN=Qsox2 PE=2 SV=1	660224	599052	649592	627509	566773	696500	766821	664190	716770	680382	0.224691	0.0565354
Q3TNA1	Xylb	Xylulose kinase OS=Mus musculus GN=Xylb PE=2 SV=1	2.74578e+06	1.21163e+06	2.56064e+06	1.40241e+06	886559	1.00008e+06	1.71014e+06	749124	1.81216e+06	835076	-0.951088	0.360736
Q3TPE9	Ankmy2	Ankyrin repeat and MYND domain-containing protein 2 OS=Mus musculus GN=Ankmy2 PE=1 SV=1	1.54464e+06	1.57526e+06	1.26242e+06	1.51434e+06	1.27043e+06	1.54085e+06	1.53389e+06	1.43503e+06	1.57704e+06	1.53544e+06	-0.00298497	0.383921
Q3TPX4	Exoc5	Exocyst complex component 5 OS=Mus musculus GN=Exoc5 PE=1 SV=2	4.38412e+06	4.19856e+06	4.08905e+06	4.34598e+06	4.0775e+06	4.60434e+06	4.80361e+06	4.14907e+06	4.34702e+06	4.50449e+06	0.163334	0.24632
Q3TQB2	Foxred1	Isoform 2 of FAD-dependent oxidoreductase domain-containing protein 1 OS=Mus musculus GN=Foxred1	331867	1.46812e+06	289400	3.51698e+06	376021	303987	318649	367228	379823	426927	-0.284373	0.283594
Q3TRM4	Pnpla6	Isoform 2 of Neuropathy target esterase OS=Mus musculus GN=Pnpla6	464021	381653	421404	344849	474656	454771	402818	437796	421451	433047	0.0609101	0.695394
Q3TRM8	Hk3	Hexokinase-3 OS=Mus musculus GN=Hk3 PE=2 SV=2	1.1671e+06	1.089e+06	1.21672e+06	1.33853e+06	982499	1.25301e+06	992598	1.1731e+06	1.02046e+06	1.06344e+06	-0.21834	0.602987
Q3TSG4	Alkbh5	RNA demethylase ALKBH5 OS=Mus musculus GN=Alkbh5 PE=1 SV=2	265989	241252	252158	298082	210708	273329	236049	226769	232908	218719	-0.187352	0.517727
Q3TTA7	Cblb	E3 ubiquitin-protein ligase CBL-B OS=Mus musculus GN=Cblb PE=1 SV=3	183992	153627	150939	173470	172883	161920	129410	160643	143054	147206	-0.374161	0.156755
Q3TUH1	Tamm41	"Phosphatidate cytidylyltransferase, mitochondrial OS=Mus musculus GN=Tamm41 PE=2 SV=2"	453213	445218	466543	533796	454278	461002	483399	466298	464930	454939	0.0283579	0.906075
Q3TV70	Nr2c2ap	Nuclear receptor 2C2-associated protein OS=Mus musculus GN=Nr2c2ap PE=2 SV=1	320349	311902	380193	316513	331223	264371	296381	296678	296387	261600	-0.195955	0.0473816
Q3TVI8	Pbxip1	Pre-B-cell leukemia transcription factor-interacting protein 1 OS=Mus musculus GN=Pbxip1 PE=1 SV=2	992653	960212	1.06385e+06	1.00731e+06	1.0688e+06	936109	906890	996451	906332	937092	-0.206446	0.10622
Q3TVP5-2	Fam105a	Isoform 2 of Inactive ubiquitin thioesterase FAM105A OS=Mus musculus GN=Fam105a	71769.5	78912.9	68886.1	85258.8	61871.3	84310	81460.3	63736.3	78260.6	76117.4	0.182613	0.650462
Q3TW96	Uap1l1	UDP-N-acetylhexosamine pyrophosphorylase-like protein 1 OS=Mus musculus GN=Uap1l1 PE=2 SV=1	1.16052e+07	1.06298e+07	1.3076e+07	1.13182e+07	1.0564e+07	9.07588e+06	8.94329e+06	9.98605e+06	9.94471e+06	9.13527e+06	-0.549557	0.022804
Q3TWL2	Tmem55b	"Type 1 phosphatidylinositol 4,5-bisphosphate 4-phosphatase OS=Mus musculus GN=Tmem55b PE=1 SV=1"	2.2597e+06	2.3873e+06	2.20654e+06	2.41227e+06	2.34524e+06	2.59398e+06	2.54309e+06	2.39262e+06	2.31173e+06	2.4868e+06	0.119698	0.228577
Q3TWN3	Cnnm2	Isoform 2 of Metal transporter CNNM2 OS=Mus musculus GN=Cnnm2	1.93351e+06	1.2644e+06	1.3678e+06	1.23497e+06	1.29268e+06	1.5188e+06	1.81926e+06	1.66952e+06	1.87811e+06	1.39424e+06	0.551053	0.227476
Q3TWW8	Srsf6	Serine/arginine-rich splicing factor 6 OS=Mus musculus GN=Srsf6 PE=2 SV=1	486913	431315	531508	350479	500006	530235	623487	436656	528935	442111	0.164528	0.412318
Q3TX08	Trmt1	tRNA (guanine(26)-N(2))-dimethyltransferase OS=Mus musculus GN=Trmt1 PE=1 SV=2	200008	217439	232038	204489	250176	208969	223881	226457	245394	216613	0.0690917	0.824513
Q3TXS7	Psmd1	26S proteasome non-ATPase regulatory subunit 1 OS=Mus musculus GN=Psmd1 PE=1 SV=1	9.04259e+06	9.29526e+06	8.71717e+06	8.7937e+06	8.68888e+06	9.74415e+06	1.00087e+07	8.86195e+06	9.35783e+06	9.50136e+06	0.158276	0.185637
Q3TXT3	Inip	Isoform 2 of SOSS complex subunit C OS=Mus musculus GN=Inip	193778	185498	172370	109654	190637	151176	142718	168635	165986	176807	-0.255887	0.813713
Q3TXU5	Dhps	Deoxyhypusine synthase OS=Mus musculus GN=Dhps PE=2 SV=2	158580	157662	172343	135200	184387	151447	142353	154016	144542	163584	-0.10626	0.447091
Q3TYD6	Lmtk2	Serine/threonine-protein kinase LMTK2 OS=Mus musculus GN=Lmtk2 PE=1 SV=3	34381.6	29967.2	32336.3	24784.3	39202.4	33909.4	31574.2	32971.5	34212	30665.2	0.0333223	0.817774
Q3TYS2	NA	Uncharacterized protein C17orf62 homolog OS=Mus musculus PE=2 SV=2	1.88957e+06	2.03316e+06	1.94772e+06	2.34117e+06	1.95542e+06	2.31285e+06	2.2317e+06	2.12463e+06	2.16851e+06	2.13173e+06	0.206284	0.222491
Q3TYX3	Smyd5	SET and MYND domain-containing protein 5 OS=Mus musculus GN=Smyd5 PE=2 SV=2	842685	998979	872652	1.05943e+06	1.04824e+06	901146	948973	949103	857823	958874	-0.125581	0.60257
Q3TZM9-2	Alg11	"Isoform 2 of GDP-Man:Man(3)GlcNAc(2)-PP-Dol alpha-1,2-mannosyltransferase OS=Mus musculus GN=Alg11"	554539	660919	537698	711885	583612	567723	572221	560776	537446	566183	-0.0858558	0.322625
Q3TZZ7	Esyt2	Extended synaptotagmin-2 OS=Mus musculus GN=Esyt2 PE=1 SV=1	8.2013e+06	8.5481e+06	7.94339e+06	8.78714e+06	8.63952e+06	8.87781e+06	9.0341e+06	8.55036e+06	8.42563e+06	8.8368e+06	0.0775075	0.405844
Q3U0B3	Dhrs11	Dehydrogenase/reductase SDR family member 11 OS=Mus musculus GN=Dhrs11 PE=2 SV=1	2.60054e+06	2.62832e+06	2.5812e+06	2.73879e+06	2.45944e+06	2.41578e+06	2.55919e+06	2.47001e+06	2.35641e+06	2.63312e+06	-0.128425	0.351765
Q3U0D9-2	Hace1	Isoform 2 of E3 ubiquitin-protein ligase HACE1 OS=Mus musculus GN=Hace1	443405	412256	454240	471961	376090	439221	471510	454654	432880	439712	-0.0213371	0.555111
Q3U0J8	Tbc1d2b	TBC1 domain family member 2B OS=Mus musculus GN=Tbc1d2b PE=1 SV=2	1.47475e+06	1.32988e+06	1.73569e+06	1.11962e+06	1.67835e+06	1.26048e+06	1.17476e+06	1.33382e+06	1.44804e+06	1.30752e+06	-0.273203	0.364467
[truncated: 4,313 more rows]

## Sheet: b. deregulated proteome in vWAT
Uniprot ID	gene name	description	ND_1	ND_2	ND_3	ND_4	ND_5	HFD_1	HFD_2	HFD_3	HFD_4	HFD_5	Log2 (HFD/ND)	qValue
[truncated: 119 more rows]
