# Supplementary material for: Diet-induced loss of adipose hexokinase 2 correlates with hyperglycemia
Source: eLife. 2023 Mar 15;12:e85103. doi: 10.7554/eLife.85103 (PMC10017106; doi:10.7554/eLife.85103)
Supplement: Supplementary file 3. [file elife-85103-supp3.xlsx]

## Sheet: Sheet1
ac	gene_Symbol	proteinDescription	ND_1	ND_2	ND_3	ND_4	HFD_1	HFD_2	HFD_3	HFD_4	MS_log2FC	MS_pValue	MS_qValue	nbPeptides	correlation with HK2	RNA_FDR	RNA_ND_1	RNA_ND_2	RNA_ND_3	RNA_HFD_1	RNA_HFD_2	RNA_HFD_3	RNA_Log2FC
NA	NA	Kit Fusion	3.26651e+07	20356297	1.00632e+07	7.77404e+06	1.35519e+07	2.40473e+07	8.03535e+06	1.64296e+07	0.0601157	0.8941	0.928386	11	0.416977	1	1.4448	0.649499	1.10311	0.893258	1.21759	1.05696	0.0504164
A2AGT5	Ckap5	Cytoskeleton-associated protein 5 OS=Mus musculus OX=10090 GN=Ckap5 PE=1 SV=1	1115.17	1568.79	1511.96	1335.47	2426.62	4028.63	3236.91	3355.84	1.21376	0.000253543	0.0156936	2	-0.826854	1	44.454	51.0782	47.2648	50.1218	43.8554	49.7701	0.00922785
A2AJI0	Map7d1	MAP7 domain-containing protein 1 OS=Mus musculus OX=10090 GN=Map7d1 PE=1 SV=1	1230.09	6976.13	1433.55	2831.7	2520.47	4682.68	8994.68	10402.8	1.68757	0.0814583	0.190163	2	-0.472228	0.52516	128.831	125.632	101.778	146.056	143.813	129.785	0.242242
A2AWA9	Rabgap1	Rab GTPase-activating protein 1 OS=Mus musculus OX=10090 GN=Rabgap1 PE=1 SV=1	3067.88	2192.03	2394.89	2412.32	2773.81	2117.26	2353.2	2528.14	0.0211603	0.830375	0.885018	1	0.186407	0.991671	61.6333	66.0968	64.3224	65.6314	60.4408	63.5241	-0.0187998
A3KMP2	Ttc38	Tetratricopeptide repeat protein 38 OS=Mus musculus OX=10090 GN=Ttc38 PE=1 SV=2	6642.87	3210.35	7331.37	8603.04	4807.55	3448.97	2969.76	5510.6	-0.777212	0.126872	0.247044	2	0.260906	0.840758	30.3134	28.5087	29.853	30.9073	31.7438	34.3235	0.128128
A6X935	Itih4	"Inter alpha-trypsin inhibitor, heavy chain 4 OS=Mus musculus OX=10090 GN=Itih4 PE=1 SV=2"	2798.48	2781.41	977.739	5444.71	4949.14	13053.7	4709.79	9480.89	1.29587	0.0204379	0.0892923	2	-0.680353	0.493651	4.80774	5.35839	5.74291	3.25812	2.2063	5.31741	-0.65085
B1AR13	Cisd3	"CDGSH iron-sulfur domain-containing protein 3, mitochondrial OS=Mus musculus OX=10090 GN=Cisd3 PE=1 SV=1"	7859	6855.5	6465.19	4827.5	3146.53	4172.4	4155.18	5450.19	-0.677083	0.0231514	0.095984	3	0.84111	0.379132	22.9798	29.131	21.147	20.0092	20.1512	18.8186	-0.299895
B1AZA5	Tmem245	Transmembrane protein 245 OS=Mus musculus OX=10090 GN=Tmem245 PE=1 SV=1	3901.69	3866.64	2934.13	2864.21	4564.84	8151.86	4810.29	6140.65	0.690251	0.00895156	0.05662	2	-0.60888	0.169642	124.719	122.417	115.428	142.115	168.728	132.722	0.284235
B2RSH2	Gnai1	Guanine nucleotide-binding protein G(i) subunit alpha-1 OS=Mus musculus OX=10090 GN=Gnai1 PE=1 SV=1	144740	161071	148195	137684	181327	176567	200904	149446	0.288925	0.143177	0.266207	5	-0.49085	1	265.456	255.635	193.984	248.514	227.902	230.83	-0.00330677
B7ZNG0	Kif7	Kinesin-like protein KIF7 OS=Mus musculus OX=10090 GN=Kif7 PE=1 SV=1	2414.94	1034.13	2147.93	1975.52	5151.24	6287.44	3292.89	10853.4	1.46611	0.00239365	0.0326247	2	-0.776309	0.84656	9.12284	8.32478	8.86422	10.3724	11.3518	9.03315	0.219956
D3YXK2	Safb	Scaffold attachment factor B1 OS=Mus musculus OX=10090 GN=Safb PE=1 SV=2	1301.68	2430.79	954.148	2188.94	1736.89	1127.17	3064.3	2762.05	0.375815	0.436617	0.577601	3	-0.317004	0.992257	69.7976	63.2964	74.1082	63.6212	75.3702	64.5552	-0.0269653
D3Z7P3	Gls	"Glutaminase kidney isoform, mitochondrial OS=Mus musculus OX=10090 GN=Gls PE=1 SV=1"	1312.18	4580.45	4520.33	1576.17	2746.95	770.853	6083.95	1958.17	-0.202759	0.781857	0.84844	2	0.0970825	0.921023	74.9636	66.1591	79.7096	77.4163	86.1224	72.5898	0.0973027
E9PV24	Fga	Fibrinogen alpha chain OS=Mus musculus OX=10090 GN=Fga PE=1 SV=1	519184	434861	575857	559732	741844	953723	350133	891149	0.5929	0.239879	0.379298	27	-0.588559	0.873803	1.56635	7.47428	6.09722	2.25305	1.09401	6.99046	-0.683534
E9PVA8	Gcn1	eIF-2-alpha kinase activator GCN1 OS=Mus musculus OX=10090 GN=Gcn1 PE=1 SV=1	523.293	1131.88	629.065	375.844	845.284	1551.68	1911.5	985.51	1.1079	0.0258411	0.101579	1	-0.448328	0.388224	63.8415	63.2342	57.0168	67.878	73.4423	66.773	0.17741
E9Q286	Ice1	Little elongation complex subunit 1 OS=Mus musculus OX=10090 GN=Ice1 PE=1 SV=1	6068.66	6174.84	7398.75	3929	9946.39	10278.8	9314.91	9100.74	0.652969	0.00699626	0.0503092	2	-0.724448	0.982226	54.9682	53.9616	61.3192	55.5216	62.6407	56.2288	0.0348632
E9Q3E1	Aldh3b2	Aldehyde dehydrogenase family 3 member B2 OS=Mus musculus OX=10090 GN=Aldh3b2 PE=1 SV=1	72312.7	61584.5	69823.6	71182	158159	123637	91011.9	116703	0.768793	0.002863	0.0346918	8	-0.792626
E9Q4Z2	Acacb	Acetyl-CoA carboxylase 2 OS=Mus musculus OX=10090 GN=Acacb PE=1 SV=1	6850.85	7478.12	6338.68	4936.69	9248.9	2352.02	4170.04	17260.2	-0.0855599	0.988116	0.993274	4	-0.280984	0.942894	238.816	195.996	130.224	143.061	255.734	101.129	-0.240083
E9Q6P5	Ttc7b	Tetratricopeptide repeat protein 7B OS=Mus musculus OX=10090 GN=Ttc7b PE=1 SV=1	2181.06	5881.29	6824.88	5601.42	2506.78	1562.87	3513.97	691.743	-1.53595	0.0292049	0.106777	2	0.570642	0.638995	65.0368	72.6727	54.3848	69.5334	75.4444	72.8038	0.19042
E9Q7G0	Numa1	Nuclear mitotic apparatus protein 1 OS=Mus musculus OX=10090 GN=Numa1 PE=1 SV=1	15345.5	21953	11379.6	12327.1	11873.4	25385.9	29538.5	22995.1	0.812851	0.143426	0.266207	10	-0.34247	0.617233	145.059	146.853	142.085	156.718	165.565	157.098	0.143155
F6ZDS4	Tpr	Nucleoprotein TPR OS=Mus musculus OX=10090 GN=Tpr PE=1 SV=1	9067.43	9039.22	8038.22	7097.63	13289.7	23693.7	10910	20149.8	0.94093	0.00545684	0.0448185	9	-0.678751	0.997854	155.755	175.293	147.096	164.088	161.288	158.48	0.0208677
F8VPU2	Farp1	"FERM, ARHGEF and pleckstrin domain-containing protein 1 OS=Mus musculus OX=10090 GN=Farp1 PE=1 SV=1"	694.555	1756.67	915.815	1088.43	404.463	3242.53	2571.17	3692.95	1.53209	0.249584	0.388966	1	-0.54809	0.92832	42.1647	39.3578	35.6569	38.4157	36.6626	33.701	-0.106025
G5E829	Atp2b1	Plasma membrane calcium-transporting ATPase 1 OS=Mus musculus OX=10090 GN=Atp2b1 PE=1 SV=1	489.425	2387.41	2270	1841.81	1784.49	423.468	2878.45	2772.56	0.12146	0.918109	0.943143	2	-0.249085	0.918754	72.9174	84.5798	84.3157	74.3617	73.5164	77.4144	-0.09905
O08528	Hk2	Hexokinase-2 OS=Mus musculus OX=10090 GN=Hk2 PE=1 SV=1	114989	113044	87117.1	72468.2	37991.7	43062.3	43527	26915.5	-1.29483	0.000296235	0.0156936	18	1	1	88.6584	92.0891	99.6355	82.6584	97.7891	103.327	0.0126788
O08529	Capn2	Calpain-2 catalytic subunit OS=Mus musculus OX=10090 GN=Capn2 PE=1 SV=4	137297	144031	147845	126344	166379	200675	159557	185209	0.319974	0.0471447	0.137545	14	-0.726869	0.652255	284.074	301.562	240.348	330.319	340.466	292.694	0.225639
O08547	Sec22b	Vesicle-trafficking protein SEC22b OS=Mus musculus OX=10090 GN=Sec22b PE=1 SV=3	81759.4	83015.3	90805.6	80551.8	90087.3	74123.7	103627	93851.2	0.158468	0.563508	0.682967	6	-0.374514	0.959884	65.4217	66.0554	58.5859	59.9951	61.2071	60.82	-0.0603032
O08553	Dpysl2	Dihydropyrimidinase-related protein 2 OS=Mus musculus OX=10090 GN=Dpysl2 PE=1 SV=2	69272.3	139764	91998	196246	102888	103343	136205	212180	0.0652747	0.595476	0.710716	14	-0.398558	0.927188	39.3893	33.3835	42.5576	37.6275	33.8695	35.5686	-0.101327
O08583	Alyref	THO complex subunit 4 OS=Mus musculus OX=10090 GN=Alyref PE=1 SV=3	5610.27	4815.21	3408.33	8529.86	6693.11	12663	3114.72	12741.4	0.824775	0.306053	0.448723	2	-0.53681	0.840758	23.8509	20.8542	19.6792	20.5019	20.4478	18.7018	-0.10672
O08585	Clta	Clathrin light chain A OS=Mus musculus OX=10090 GN=Clta PE=1 SV=2	12612.8	12050.9	9571.02	8960.2	10391.2	9849.75	5490.53	7599.18	-0.311905	0.133512	0.253981	3	0.717783	0.973294	113.556	110.344	93.7471	105.44	110.074	110.798	0.0435191
O08638	Myh11	Myosin-11 OS=Mus musculus OX=10090 GN=Myh11 PE=1 SV=1	58571.2	44214.8	39463.8	32309.4	59377.5	111139	79445.3	51670.6	0.717408	0.0274557	0.103888	17	-0.436265	0.118805	185.232	177.264	253.019	250.209	290.512	1027.79	1.05624
O08677	Kng1	Kininogen-1 OS=Mus musculus OX=10090 GN=Kng1 PE=1 SV=1	102898	86871.9	85011.4	94309.3	97870.1	111097	81056.5	135070	0.204165	0.36904	0.511228	12	-0.460596	0.910452	0.8573	3.71961	2.92529	0.972087	0.797397	3.85835	-0.54703
O08709	Prdx6	Peroxiredoxin-6 OS=Mus musculus OX=10090 GN=Prdx6 PE=1 SV=3	657999	696490	626596	678346	697197	739365	629983	786036	0.103874	0.525817	0.654627	15	-0.486875	0.229278	402.425	437.705	360.257	322.022	341.529	278.512	-0.350267
O08739	Ampd3	AMP deaminase 3 OS=Mus musculus OX=10090 GN=Ampd3 PE=1 SV=2	301.249	825.363	877.21	647.346	758.002	1323.25	1559.23	1016.73	0.666157	0.0467456	0.137006	2	-0.632774	0.999821	57.8652	55.6626	60.7962	62.8724	63.1598	45.0233	-0.0437608
O08749	Dld	"Dihydrolipoyl dehydrogenase, mitochondrial OS=Mus musculus OX=10090 GN=Dld PE=1 SV=2"	452908	295727	413002	359072	360271	353418	216390	357460	-0.115631	0.301845	0.444433	16	0.358523	0.204735	184.543	212.736	166.33	157.96	162.846	142.975	-0.276084
O08756	Hsd17b10	3-hydroxyacyl-CoA dehydrogenase type-2 OS=Mus musculus OX=10090 GN=Hsd17b10 PE=1 SV=4	72883.5	53115.4	55701.8	59769.5	28961.6	16172.7	33317.2	18136.4	-1.33205	0.000639915	0.0208935	4	0.890229	0.367897	95.6679	86.1978	81.8018	73.4157	81.1789	70.9945	-0.224306
O08788	Dctn1	Dynactin subunit 1 OS=Mus musculus OX=10090 GN=Dctn1 PE=1 SV=3	36384.5	61959.4	51764.1	36901.1	48629	88653	67954.5	62009.4	0.57072	0.0737134	0.17967	16	-0.463353	0.311849	91.4541	95.6571	78.0899	104.257	104.932	104.806	0.249019
O08795	Prkcsh	Glucosidase 2 subunit beta OS=Mus musculus OX=10090 GN=Prkcsh PE=1 SV=1	41408.6	37837.4	61376.6	58660.3	65586.6	84492.5	47154.8	87771.6	0.594955	0.0880705	0.197192	8	-0.767068	0.781155	60.7217	60.2885	52.4108	61.6899	61.1824	67.5706	0.136862
O08915	Aip	AH receptor-interacting protein OS=Mus musculus OX=10090 GN=Aip PE=1 SV=1	1147.02	2761.1	2767.97	2574.67	4868.98	8073.36	4560.43	8394.85	1.23358	0.00213944	0.0311568	2	-0.840282	0.688401	47.5941	48.34	40.8366	49.7868	48.7989	50.8984	0.132123
O08917	Flot1	Flotillin-1 OS=Mus musculus OX=10090 GN=Flot1 PE=1 SV=1	28289.2	36625.7	39213.2	34508.3	43960.2	98116.1	72675.6	70527.2	1.00992	0.00392986	0.038923	12	-0.720867	0.694093	85.5183	83.9367	72.8934	93.4776	83.9472	92.8804	0.159385
O08997	Atox1	Copper transport protein ATOX1 OS=Mus musculus OX=10090 GN=Atox1 PE=1 SV=1	15769.7	16767.6	12044	10812.6	17415.1	29619.5	16448.6	23202.2	0.544566	0.0323676	0.111739	1	-0.51229	0.967805	74.4773	70.0797	62.0278	66.735	62.4182	68.9129	-0.0578426
O09044	Snap23	Synaptosomal-associated protein 23 OS=Mus musculus OX=10090 GN=Snap23 PE=1 SV=1	1748.42	2249.14	2674.29	3329.55	1160.88	9930.87	3642.72	6150.37	0.94858	0.25771	0.398404	2	-0.508389	1	47.8169	52.4265	46.3031	49.4321	46.3518	49.4783	-0.0113533
O09061	Psmb1	Proteasome subunit beta type-1 OS=Mus musculus OX=10090 GN=Psmb1 PE=1 SV=1	27014.7	20437.3	33125.1	34692.7	33093.5	17729.4	13344.7	13203.8	-0.959627	0.0770982	0.184598	5	0.3607	1	121.721	129.802	116.035	121.048	123.965	120.661	-0.00599105
O09111	Ndufb11	"NADH dehydrogenase [ubiquinone] 1 beta subcomplex subunit 11, mitochondrial OS=Mus musculus OX=10090 GN=Ndufb11 PE=1 SV=2"	32945.2	38485.5	27646.5	21170.1	18492.3	30303.5	21580.1	21389.5	-0.49028	0.14908	0.271953	1	0.773434	0.765217	100.834	108.269	92.1949	92.512	93.4635	93.0944	-0.107471
O09117	Sypl1	Synaptophysin-like protein 1 OS=Mus musculus OX=10090 GN=Sypl1 PE=1 SV=2	9721.85	12786.9	4384.16	8938.99	4377.97	2862.79	6659.05	1724.53	-1.39683	0.023825	0.0966857	1	0.814951
O09131	Gsto1	Glutathione S-transferase omega-1 OS=Mus musculus OX=10090 GN=Gsto1 PE=1 SV=2	52737	51721	44419.9	43571.7	48217.9	30135.9	41378.2	35985	-0.312844	0.125567	0.24533	7	0.73452	0.792215	52.8208	52.0324	41.444	42.2784	45.6845	43.2919	-0.148654
O09164	Sod3	Extracellular superoxide dismutase [Cu-Zn] OS=Mus musculus OX=10090 GN=Sod3 PE=1 SV=1	231.612	1636.38	2106.73	1960.42	3187.25	751.333	1042.98	725.253	-1.01672	0.947203	0.966158	2	-0.124639	0.322979	259.784	264.907	243.857	356.707	352.503	354.247	0.469432
O35074	Ptgis	Prostacyclin synthase OS=Mus musculus OX=10090 GN=Ptgis PE=1 SV=1	4492.15	3261.63	3317.84	3481.99	1860.45	3688.64	5832.81	5870.16	0.448561	0.75284	0.827028	3	-0.227148	0.677352	32.8863	29.6081	27.0016	39.5785	31.2494	33.2924	0.215739
O35129	Phb2	Prohibitin-2 OS=Mus musculus OX=10090 GN=Phb2 PE=1 SV=1	380233	175183	197833	173567	148721	207786	82227.6	188271	-0.153864	0.155239	0.280531	13	0.57696	0.696566	105.311	106.319	89.8666	85.2597	95.6634	83.6786	-0.186671
O35206	Col15a1	Collagen alpha-1(XV) chain OS=Mus musculus OX=10090 GN=Col15a1 PE=1 SV=2	153138	194071	147125	162629	156148	158206	172659	207881	0.0666568	0.654724	0.75679	8	-0.210615	0.901467	319.02	510.496	292.938	413.562	373.365	467.606	0.199281
O35215	Ddt	D-dopachrome decarboxylase OS=Mus musculus OX=10090 GN=Ddt PE=1 SV=3	105906	72602.7	119382	151935	128161	113120	73509.9	119562	0.0486154	0.908053	0.937258	5	-0.250567	0.238062	26.1807	23.5924	20.4215	18.0779	19.8793	17.3206	-0.339641
O35226	Psmd4	26S proteasome non-ATPase regulatory subunit 4 OS=Mus musculus OX=10090 GN=Psmd4 PE=1 SV=1	24563.7	25640.5	27132.2	21380.9	26719	37237.6	23341.6	33235.4	0.247816	0.199292	0.333801	3	-0.475425	0.997854	111.044	117.542	96.7672	105.085	117.983	105.681	0.0176531
O35295	Purb	Transcriptional activator protein Pur-beta OS=Mus musculus OX=10090 GN=Purb PE=1 SV=3	30044.2	36923.5	41484.5	32639.6	50407.2	82307.4	36070.5	75531.4	0.829771	0.029496	0.107388	3	-0.678923	0.989537	102.049	106.299	97.6952	101.676	101.2	99.2808	-0.0176592
O35343	Kpna4	Importin subunit alpha-3 OS=Mus musculus OX=10090 GN=Kpna4 PE=1 SV=1	8246.31	9398.56	9446.68	6293.57	18335.7	51085.6	18496.8	33555	1.50074	0.000831767	0.0218861	3	-0.671057	1	85.0929	104.66	82.2404	90.3836	89.6817	90.6043	0.00130983
O35344	Kpna3	Importin subunit alpha-4 OS=Mus musculus OX=10090 GN=Kpna3 PE=1 SV=1	7328.31	9143.5	7022.55	5394.43	8195.86	17974	8908.72	13944.2	0.635668	0.0384522	0.120939	1	-0.517849	0.853949	51.9902	55.7456	46.6237	47.1657	47.2911	48.6612	-0.10536
O35345	Kpna6	Importin subunit alpha-7 OS=Mus musculus OX=10090 GN=Kpna6 PE=1 SV=2	670.641	2141.5	1373.41	1332.56	1555.9	7207.55	2680.09	5912.73	1.55707	0.020064	0.0889176	1	-0.622873	0.983508	91.2313	107.274	82.7129	99.2912	92.7714	95.0982	0.0379666
O35350	Capn1	Calpain-1 catalytic subunit OS=Mus musculus OX=10090 GN=Capn1 PE=1 SV=1	7489.29	9789.67	12180.2	14991.7	8719.39	7492.63	15087.3	13956	0.0146596	0.975156	0.984817	5	-0.309096	0.0546724	40.0173	43.3407	39.7906	50.6539	47.1675	51.6766	0.279735
O35381	Anp32a	Acidic leucine-rich nuclear phosphoprotein 32 family member A OS=Mus musculus OX=10090 GN=Anp32a PE=1 SV=1	64340.3	40878.5	66869.9	62595.6	58404.3	52583.1	34401.6	49076.1	-0.321082	0.282708	0.424552	8	0.269886	0.892458	123.888	110.883	113.403	126.172	128.093	113.191	0.0772646
O35459	Ech1	"Delta(3,5)-Delta(2,4)-dienoyl-CoA isomerase, mitochondrial OS=Mus musculus OX=10090 GN=Ech1 PE=1 SV=1"	96131.2	72630.9	145649	150060	235796	197493	60017.1	196506	0.735397	0.336726	0.478708	11	-0.618812	0.595988	389.277	409.576	349.256	447.103	493.739	434.592	0.261602
O35465	Fkbp8	Peptidyl-prolyl cis-trans isomerase FKBP8 OS=Mus musculus OX=10090 GN=Fkbp8 PE=1 SV=2	5334.06	8027.24	9378.71	4061.51	7583.97	6957.05	3798.34	12231.6	0.150644	0.717476	0.802184	3	-0.221339	0.947188	161.266	160.669	139.42	159.398	163.439	158.655	0.0647722
O35490	Bhmt	Betaine--homocysteine S-methyltransferase 1 OS=Mus musculus OX=10090 GN=Bhmt PE=1 SV=1	17207.4	6625.53	2849.97	6071.29	11451.5	13260.5	9087.52	14359	0.958243	0.118158	0.235365	2	-0.212549	1	0.472385	3.4292	1.52491	0.676479	0.574939	3.91671	-0.232463
O35566	Cd151	CD151 antigen OS=Mus musculus OX=10090 GN=Cd151 PE=1 SV=2	2522.57	6247.66	7001.26	8212.89	6812.39	1455.13	3422.83	2627.66	-1.14098	0.14256	0.265939	2	0.260333	0.958508	326.556	354.418	296.177	346.281	340.145	327.478	0.0567493
O35593	Psmd14	26S proteasome non-ATPase regulatory subunit 14 OS=Mus musculus OX=10090 GN=Psmd14 PE=1 SV=2	10477	12597.7	12133.8	15542.1	17229.1	13830.1	20818.9	17539	0.491609	0.0462073	0.136884	3	-0.793829	0.862644	75.7536	86.5919	64.9298	69.9275	70.8222	69.4187	-0.103014
O35609	Scamp3	Secretory carrier-associated membrane protein 3 OS=Mus musculus OX=10090 GN=Scamp3 PE=1 SV=3	18564.1	22151.8	21045.4	17762.5	24332.5	41371.7	26068.2	36907.5	0.650094	0.0136173	0.0702343	5	-0.686151	0.992257	43.3398	45.8092	42.0008	42.4951	45.0665	41.7161	-0.0205958
O35639	Anxa3	Annexin A3 OS=Mus musculus OX=10090 GN=Anxa3 PE=1 SV=4	6068.34	8171.85	8443.59	9326.76	5573.54	8695.74	12589.9	15552.8	0.332992	0.347548	0.49073	4	-0.534348	0.222574	87.7468	83.7292	74.8843	125.049	98.4812	108.93	0.428618
O35643	Ap1b1	AP-1 complex subunit beta-1 OS=Mus musculus OX=10090 GN=Ap1b1 PE=1 SV=2	31591.3	27196	16114.2	20537.2	19192.9	13744.2	27991.1	18114.5	-0.341961	0.366353	0.508725	3	0.562423	0.923254	77.6174	89.0397	68.3717	77.2783	78.9049	91.9272	0.0821467
O35678	Mgll	Monoglyceride lipase OS=Mus musculus OX=10090 GN=Mgll PE=1 SV=1	377091	433880	403104	402428	480435	293728	456842	351976	-0.00635562	0.779424	0.846482	11	0.0921938	0.901467	1166.14	1356.58	991.1	1257.09	1398.72	1355.53	0.201413
O35682	Myadm	Myeloid-associated differentiation marker OS=Mus musculus OX=10090 GN=Myadm PE=1 SV=2	27669.8	34052.4	28211	32249	22421.9	37283.3	61069.9	32186.4	0.199732	0.440176	0.580095	2	-0.258556	0.566153	200.952	199.75	211.834	242.937	214.579	235.46	0.176529
O35683	Ndufa1	NADH dehydrogenase [ubiquinone] 1 alpha subcomplex subunit 1 OS=Mus musculus OX=10090 GN=Ndufa1 PE=1 SV=1	5634.19	4570.4	3562.96	3455.04	2978.03	983.868	2208	3872.18	-0.654147	0.0520405	0.144994	2	0.708432	0.331625	55.9609	56.9902	50.8417	45.2147	49.0461	49.6144	-0.186485
O35685	Nudc	Nuclear migration protein nudC OS=Mus musculus OX=10090 GN=Nudc PE=1 SV=1	2796.57	1988.8	2121.92	2032.34	1594.8	278.36	691.54	1768.91	-0.983625	0.0343277	0.115172	2	0.681183	0.98805	57.2575	52.3643	56.3082	52.802	53.2975	56.8708	-0.0256816
O35737	Hnrnph1	Heterogeneous nuclear ribonucleoprotein H OS=Mus musculus OX=10090 GN=Hnrnph1 PE=1 SV=3	104075	92727.8	97426.3	85261.2	97820.6	122197	97966.6	120294	0.191736	0.239579	0.379298	9	-0.482181	0.986468	187.156	169.589	220.405	184.643	213.665	163.304	-0.0395958
O35855	Bcat2	"Branched-chain-amino-acid aminotransferase, mitochondrial OS=Mus musculus OX=10090 GN=Bcat2 PE=1 SV=2"	387489	179878	322467	295218	233186	132587	94996.1	147147	-1.14337	0.0153733	0.0761197	14	0.647357	0.344983	208.792	189.856	187.471	141.031	196.387	131.711	-0.342183
O35857	Timm44	Mitochondrial import inner membrane translocase subunit TIM44 OS=Mus musculus OX=10090 GN=Timm44 PE=1 SV=2	12223.3	10825.2	11054.7	12026.9	8434.02	9715.76	5953.63	7269.79	-0.558324	0.0137579	0.070697	7	0.784365	0.678824	51.0583	49.0868	44.9196	42.5937	48.1068	40.4516	-0.14725
O35887	Calu	Calumenin OS=Mus musculus OX=10090 GN=Calu PE=1 SV=1	19476.3	13333.3	16510.3	14711.2	21267.7	32429.1	15868	31987.1	0.742938	0.0464936	0.137006	4	-0.62867	0.896614	287.295	322.14	268.389	323.677	284.209	331.135	0.0981272
O35945	Aldh1a7	"Aldehyde dehydrogenase, cytosolic 1 OS=Mus musculus OX=10090 GN=Aldh1a7 PE=1 SV=1"	311904	244409	283405	268092	362057	368181	336201	362841	0.394981	0.0349768	0.116291	17	-0.806856	0.641437	146.801	187.138	111.648	130.054	126.363	104.417	-0.279297
O35963	Rab33b	Ras-related protein Rab-33B OS=Mus musculus OX=10090 GN=Rab33b PE=1 SV=1	109527	88083	56894.8	62493.7	27667.1	19551.9	37246	16397.1	-1.67355	0.000574395	0.020738	1	0.961461	0.993168	19.0091	18.2612	20.1684	18.275	20.3243	19.8107	0.0239297
O54724	Cavin1	Caveolae-associated protein 1 OS=Mus musculus OX=10090 GN=Cavin1 PE=1 SV=1	2.86951e+07	2.47906e+07	2.04438e+07	2.62429e+07	2.32109e+07	3.70821e+07	2.65148e+07	3.58624e+07	0.273772	0.225275	0.363502	49	-0.445793	0.0747403	1141.46	1056.81	931.576	1502.96	1517.02	1583.47	0.561265
O54734	Ddost	Dolichyl-diphosphooligosaccharide--protein glycosyltransferase 48 kDa subunit OS=Mus musculus OX=10090 GN=Ddost PE=1 SV=2	26712.3	24677.4	25009.5	29686	31641	36636.5	30448.8	33041.5	0.323049	0.0687195	0.172659	4	-0.83912	1	105.554	109.161	102.251	107.115	101.151	109.222	0.00212404
O54754	Aox1	Aldehyde oxidase 1 OS=Mus musculus OX=10090 GN=Aox1 PE=1 SV=2	7326.55	4974.43	6019.83	5711.61	3630.46	3303.27	3628.62	4750.14	-0.692024	0.0081095	0.0540529	3	0.760982	0.908845	135.983	123.413	139.808	137.839	172.337	126.03	0.117209
O54833	Csnk2a2	Casein kinase II subunit alpha' OS=Mus musculus OX=10090 GN=Csnk2a2 PE=1 SV=1	4863.8	3936.86	3245.12	2729.18	3283.95	3169.9	3922.4	4082.2	0.0059256	0.977514	0.986623	2	0.345369	0.76101	41.9216	41.9716	42.895	43.6579	45.9069	45.6263	0.0923011
O54879	Hmgb3	High mobility group protein B3 OS=Mus musculus OX=10090 GN=Hmgb3 PE=1 SV=3	12610.2	6612.68	7791.85	6786.54	8831.17	9146.13	5577.56	9509.23	0.305562	0.970144	0.982618	2	0.169021	0.862612	9.1431	9.00933	11.1588	8.57906	7.52057	9.50005	-0.194873
O54931	Akap2	A-kinase anchor protein 2 OS=Mus musculus OX=10090 GN=Akap2 PE=1 SV=3	13077.2	27232.5	17531.7	23513.3	32842.6	72272.7	57824.5	65515.7	1.60004	0.00133823	0.0266569	9	-0.790835
O54984	Asna1	ATPase Asna1 OS=Mus musculus OX=10090 GN=Asna1 PE=1 SV=2	2137.41	1968.69	1751.53	2613.94	2608.86	1629.26	1855.02	2273.56	0.00164525	0.90431	0.935065	1	-0.145249	0.847219	42.651	45.1454	38.5083	38.2187	39.2826	38.8369	-0.115577
O54988	Slk	STE20-like serine/threonine-protein kinase OS=Mus musculus OX=10090 GN=Slk PE=1 SV=2	20439.4	16877.4	17306.9	12389.1	13324.7	35651.9	18332.2	28339.5	0.415376	0.212104	0.348994	10	-0.36286	1	92.2037	99.3495	102.065	101.597	95.7375	95.6818	-0.00221303
O55003	Bnip3	BCL2/adenovirus E1B 19 kDa protein-interacting protein 3 OS=Mus musculus OX=10090 GN=Bnip3 PE=1 SV=1	323.109	786.386	1407.71	519.669	1597.73	2107.42	763.597	557.581	0.788967	0.212694	0.349383	1	-0.377577	0.983815	243.658	183.259	232.047	227.762	215.272	198.711	-0.0295988
O55013	Trappc3	Trafficking protein particle complex subunit 3 OS=Mus musculus OX=10090 GN=Trappc3 PE=1 SV=1	27558.6	10846.9	9476.41	15165.4	13350.2	18181.2	12749	21497.5	0.280625	0.663717	0.763253	3	0.0421394	0.688407	64.267	65.2671	59.0077	57.2558	59.8476	56.2288	-0.120437
O55022	Pgrmc1	Membrane-associated progesterone receptor component 1 OS=Mus musculus OX=10090 GN=Pgrmc1 PE=1 SV=4	112555	92973.6	79007	74057.6	84493.4	118782	78205.4	122338	0.225143	0.485895	0.620528	5	-0.136842	0.817144	137.988	142.061	137.496	130.212	131.899	233.514	0.191119
O55023	Impa1	Inositol monophosphatase 1 OS=Mus musculus OX=10090 GN=Impa1 PE=1 SV=1	31779.8	16160.6	29770.9	27751.6	37988	40612.2	19601.3	52567.8	0.450494	0.19813	0.332712	6	-0.604896	0.310788	36.8367	35.3957	45.7632	34.6714	29.7911	32.1836	-0.28132
O55026	Entpd2	Ectonucleoside triphosphate diphosphohydrolase 2 OS=Mus musculus OX=10090 GN=Entpd2 PE=1 SV=2	3984.94	3695.47	3058.76	5659.73	3734.58	2493.09	4121.04	3168.91	-0.157691	0.302809	0.445096	2	0.220031	1	35.7427	37.4286	41.5452	41.1748	37.2063	37.6502	0.0178296
O55028	Bckdk	"[3-methyl-2-oxobutanoate dehydrogenase [lipoamide]] kinase, mitochondrial OS=Mus musculus OX=10090 GN=Bckdk PE=1 SV=1"	327.556	855.132	224.03	528.759	573.457	275.981	457.233	310.284	-0.143917	0.749426	0.825131	1	0.291678	0.826119	65.7053	67.3	58.6028	61.4929	61.5284	56.0148	-0.0967019
O55029	Copb2	Coatomer subunit beta' OS=Mus musculus OX=10090 GN=Copb2 PE=1 SV=2	56569.3	43878.3	54881.4	42701.2	48212.4	52985.8	57312.4	59922.8	0.167314	0.407024	0.549356	8	-0.323387	0.991199	140.399	155.545	130.342	142.785	138.425	151.904	0.0256451
O55106	Strn	Striatin OS=Mus musculus OX=10090 GN=Strn PE=1 SV=2	2084.82	2349	1862.11	2200.44	2016.61	638.529	1534.07	1485.03	-0.504932	0.0687744	0.172659	2	0.621939	0.992257	42.0229	44.4816	38.947	41.5098	46.3024	39.4205	0.0191959
O55126	Nipsnap2	Protein NipSnap homolog 2 OS=Mus musculus OX=10090 GN=Nipsnap2 PE=1 SV=1	13680.9	12430.6	10195.3	9401.45	4483.04	2358.01	6730.04	3468.62	-1.51341	0.00111081	0.0250907	3	0.952904	0.682545	82.5808	86.6127	73.6695	70.8538	78.0892	68.9324	-0.155434
O55131	Sep.07	Septin-7 OS=Mus musculus OX=10090 GN=Sept7 PE=1 SV=1	105745	129331	90888.5	105923	119774	166894	156613	193474	0.611266	0.023324	0.0961199	13	-0.682788	0.921316	142.06	153.699	143.621	147.85	135.706	137.917	-0.0601539
O55142	Rpl35a	60S ribosomal protein L35a OS=Mus musculus OX=10090 GN=Rpl35a PE=1 SV=2	28110	30041.8	19856	21289.7	13356.8	7152.27	12559.3	8687.32	-1.22775	0.0008577	0.0218861	3	0.954962	0.939602	67.5894	64.4581	74.125	64.2125	67.955	62.4931	-0.08133
O55143	Atp2a2	Sarcoplasmic/endoplasmic reticulum calcium ATPase 2 OS=Mus musculus OX=10090 GN=Atp2a2 PE=1 SV=2	200063	185053	189097	165734	157917	220123	252078	232165	0.273197	0.310607	0.453441	23	-0.361883	0.762112	143.478	155.545	156.713	158.452	145.889	254.33	0.249777
O55222	Ilk	Integrin-linked protein kinase OS=Mus musculus OX=10090 GN=Ilk PE=1 SV=2	91020.5	86847.2	96485.5	80062.8	81786.5	119782	134080	127263	0.473707	0.098081	0.211411	15	-0.584508	0.921729	154.418	162.059	155.853	159.753	160.028	169.082	0.0494492
O55229	Chkb	Choline/ethanolamine kinase OS=Mus musculus OX=10090 GN=Chkb PE=1 SV=3	865.057	706.427	857.721	778.165	1536.92	1351	916.563	1472.55	0.787807	0.008152	0.054128	1	-0.801128	0.942894	2.64006	2.93134	3.02652	3.00193	3.29387	3.06073	0.123252
O55234	Psmb5	Proteasome subunit beta type-5 OS=Mus musculus OX=10090 GN=Psmb5 PE=1 SV=3	58705.9	29897.5	44054.6	38104.3	23579.4	11875	18616.8	13746.6	-1.35678	0.00124917	0.0257717	8	0.820211	1	23.2026	24.1525	17.9413	21.9602	22.969	20.5305	0.0142031
O70133	Dhx9	ATP-dependent RNA helicase A OS=Mus musculus OX=10090 GN=Dhx9 PE=1 SV=2	15291.2	14166.3	16599.6	10570.5	8487.2	9166.1	11433.1	8384.13	-0.738712	0.016684	0.0789619	4	0.861274	0.811395	93.7231	105.656	98.8931	93.3003	87.1605	93.6002	-0.121168
O70152	Dpm1	Dolichol-phosphate mannosyltransferase subunit 1 OS=Mus musculus OX=10090 GN=Dpm1 PE=1 SV=1	8187.25	8761.23	10056.6	7381.26	10692.6	21401.3	10842.5	16058.4	0.639681	0.0197933	0.0881792	2	-0.623844	0.997854	7.76551	5.52434	8.98233	6.11566	10.3631	6.38739	0.0237149
O70194	Eif3d	Eukaryotic translation initiation factor 3 subunit D OS=Mus musculus OX=10090 GN=Eif3d PE=1 SV=2	475.461	756.704	144.494	857.912	2402.47	972.118	4581.27	2739.02	2.09649	0.0056415	0.0451518	1	-0.683817	0.999821	82.8037	81.5926	70.4132	77.2389	81.5249	74.3406	-0.00775309
O70251	Eef1b	Elongation factor 1-beta OS=Mus musculus OX=10090 GN=Eef1b PE=1 SV=5	39747	51808	44117.5	45019.2	43453.1	40442.1	33192.7	62406.3	-0.088286	0.85139	0.898574	6	-0.104465
O70252	Hmox2	Heme oxygenase 2 OS=Mus musculus OX=10090 GN=Hmox2 PE=1 SV=1	2658.67	2743.13	4374.04	6813.98	7760.22	19864.5	5813.99	17906.6	1.76686	0.0102115	0.0596804	2	-0.740707	0.993512	47.1686	50.9537	45.8813	49.097	46.9203	49.6144	0.0172289
O70310	Nmt1	Glycylpeptide N-tetradecanoyltransferase 1 OS=Mus musculus OX=10090 GN=Nmt1 PE=1 SV=1	26313.9	29021.1	24249.1	20733.7	19045.5	40240.1	23392.8	47091.6	0.280472	0.375833	0.51898	4	-0.351163	0.983508	108.877	115.032	90.9126	105.282	113.757	102.569	0.0365065
O70318	Epb41l2	Band 4.1-like protein 2 OS=Mus musculus OX=10090 GN=Epb41l2 PE=1 SV=2	223506	435331	280063	364008	429726	666687	581733	853874	0.963823	0.00809218	0.0540529	40	-0.772484	1	521.343	636.599	425.771	536.515	564.283	483.441	0.0168948
O70325	Gpx4	Phospholipid hydroperoxide glutathione peroxidase OS=Mus musculus OX=10090 GN=Gpx4 PE=1 SV=4	150817	126882	115260	112002	95427.1	50634.4	89468.7	67075.4	-0.64253	0.00994031	0.0596804	10	0.881476	0.78448	316.265	317.452	266.162	264.95	296.741	227.445	-0.193179
O70378	Emc8	ER membrane protein complex subunit 8 OS=Mus musculus OX=10090 GN=Emc8 PE=1 SV=1	8133.7	10358.9	9819.45	7208.65	11203.7	18559.3	14114.5	19462.4	0.856813	0.00645964	0.0480453	3	-0.729303	1	57.4398	57.3636	55.9877	58.3594	58.9084	52.6687	-0.00897016
O70400	Pdlim1	PDZ and LIM domain protein 1 OS=Mus musculus OX=10090 GN=Pdlim1 PE=1 SV=4	36974.2	35347	33304.9	28230.2	22992	78533.2	51131.5	100608	0.885097	0.116744	0.233953	7	-0.558348	0.400589	32.0354	33.2176	32.9574	39.6179	33.2268	41.8912	0.217643
O70423	Aoc3	Membrane primary amine oxidase OS=Mus musculus OX=10090 GN=Aoc3 PE=1 SV=3	1.43866e+06	1.92917e+06	1.23574e+06	2.29393e+06	1.79277e+06	1.7731e+06	2.3425e+06	1.53171e+06	0.0978795	0.590817	0.708571	21	-0.222016	0.908381	1444.71	1413.86	1207.77	1494.19	1561.07	1480.87	0.161859
O70435	Psma3	Proteasome subunit alpha type-3 OS=Mus musculus OX=10090 GN=Psma3 PE=1 SV=3	34259.1	25007.4	34573.7	30984.3	32750.1	40294.7	23502.7	46309.1	0.157033	0.518488	0.649673	5	-0.422169	0.382564	62.8894	66.3665	63.1582	58.7339	55.8434	51.7933	-0.2113
O70439	Stx7	Syntaxin-7 OS=Mus musculus OX=10090 GN=Stx7 PE=1 SV=3	8454.92	13273.6	10351.1	11619.8	12023.7	23124.7	16611.8	14171.8	0.484432	0.0453955	0.134941	3	-0.558464	0.554922	66.0903	67.1755	66.6339	60.6455	55.349	63.2907	-0.159226
O70456	Sfn	14-3-3 protein sigma OS=Mus musculus OX=10090 GN=Sfn PE=1 SV=2	444702	358196	437519	399854	522244	524216	395228	557548	0.323032	0.143561	0.266207	1	-0.682142	0.873803	3.08575	2.37125	3.00965	3.21871	3.54104	3.21636	0.245074
O70475	Ugdh	UDP-glucose 6-dehydrogenase OS=Mus musculus OX=10090 GN=Ugdh PE=1 SV=1	7329.7	3831.54	6028.93	3787.18	7342.77	3723.93	11182.9	10009.8	0.834917	0.176258	0.306681	4	-0.453125	0.824354	52.4156	56.4716	47.8216	62.3403	54.0884	61.1118	0.180583
O70492	Snx3	Sorting nexin-3 OS=Mus musculus OX=10090 GN=Snx3 PE=1 SV=3	13286.7	14171.3	13918	12394.1	15885.4	39753.8	16010.1	40349.3	0.891568	0.0290518	0.10676	3	-0.628959	0.883723	96.9645	100.988	92.2118	93.6156	90.6704	92.005	-0.0698103
O70493	Snx12	Sorting nexin-12 OS=Mus musculus OX=10090 GN=Snx12 PE=1 SV=1	5999.22	8300.19	5764.93	5077.84	6985.42	10721.7	6963.24	10141	0.517196	0.0767168	0.184598	2	-0.477399	0.905037	29.422	30.4586	25.1626	26.6111	26.4295	27.5146	-0.0735508
O70503	Hsd17b12	Very-long-chain 3-oxoacyl-CoA reductase OS=Mus musculus OX=10090 GN=Hsd17b12 PE=1 SV=1	312922	279265	191446	190442	208030	189462	254374	181940	-0.219937	0.391901	0.533934	10	0.682461	0.758901	157.518	200.788	122.969	139.573	153.502	121.828	-0.191786
O70566	Diaph2	Protein diaphanous homolog 2 OS=Mus musculus OX=10090 GN=Diaph2 PE=1 SV=2	392.573	429.698	159.417	244.401	743.557	1857.35	700.327	1027.03	1.49632	0.00183701	0.0300334	1	-0.618828	0.884507	25.5121	29.8571	26.7485	28.8578	30.2607	28.4484	0.0953458
O88322	Nid2	Nidogen-2 OS=Mus musculus OX=10090 GN=Nid2 PE=1 SV=2	104972	116293	106899	107119	143128	159529	104642	140892	0.408215	0.103947	0.219149	21	-0.633339	0.486684	145.97	165.336	131.22	122.191	122.507	117.684	-0.282047
O88342	Wdr1	WD repeat-containing protein 1 OS=Mus musculus OX=10090 GN=Wdr1 PE=1 SV=3	129905	84750.9	126225	128763	133009	120992	119370	175617	-0.00713838	0.310841	0.453441	12	-0.60084	0.676995	122.855	133.37	116.086	140.538	132.394	147.235	0.175448
O88384	Vti1b	Vesicle transport through interaction with t-SNAREs homolog 1B OS=Mus musculus OX=10090 GN=Vti1b PE=1 SV=1	11144.6	9405.25	8879.98	8132.94	11204.9	17485.9	9524.44	12205.7	0.355757	0.105164	0.220641	4	-0.417912	0.958408	74.6597	75.8258	70.3457	70.3217	70.402	72.4536	-0.0502789
O88428	Papss2	Bifunctional 3'-phosphoadenosine 5'-phosphosulfate synthase 2 OS=Mus musculus OX=10090 GN=Papss2 PE=1 SV=2	490.759	1670.95	1737.13	2218.13	438.107	2090.04	2467.2	2013.18	0.267817	0.84436	0.894932	2	-0.315441	0.96566	75.4092	67.8808	68.3886	69.2772	69.3886	60.392	-0.090021
O88447	Klc1	Kinesin light chain 1 OS=Mus musculus OX=10090 GN=Klc1 PE=1 SV=3	2572.34	3317.75	2822.18	2828.43	3446.47	7870.85	4517.16	3555.86	0.504402	0.0381943	0.120566	2	-0.478106	0.331625	72.8567	72.7349	68.0849	81.1409	82.9585	77.5895	0.177879
O88456	Capns1	Calpain small subunit 1 OS=Mus musculus OX=10090 GN=Capns1 PE=1 SV=1	36845.6	26561.7	39424	39885.5	39488	31581.7	29901.8	31393.6	-0.275501	0.619488	0.728834	4	0.0267839	1	297.991	290.547	273.299	294.452	291.871	279.329	0.00693514
O88487	Dync1i2	Cytoplasmic dynein 1 intermediate chain 2 OS=Mus musculus OX=10090 GN=Dync1i2 PE=1 SV=1	48326.9	54788.5	53849.4	39659.8	54976.4	112707	58813.6	117742	0.674447	0.0358594	0.117046	8	-0.6127	0.854911	85.5994	85.8866	81.8186	87.8414	83.7001	98.3859	0.088706
O88492	Plin4	Perilipin-4 OS=Mus musculus OX=10090 GN=Plin4 PE=1 SV=2	1.71681e+06	4.73649e+06	2.36855e+06	3.24133e+06	4.51639e+06	5.20273e+06	6.54572e+06	5.01163e+06	0.88198	0.0172989	0.0799442	52	-0.660646	0.0292914	1777	1840.95	1807.23	2872.11	3357.94	2707.44	0.714313
O88543	Cops3	COP9 signalosome complex subunit 3 OS=Mus musculus OX=10090 GN=Cops3 PE=1 SV=3	16365.3	22171.6	16616.1	11496.7	18094.6	29195.3	19510.8	30859.9	0.533398	0.0708457	0.175394	4	-0.485508	0.502093	50.6734	62.6326	51.9215	50.1218	48.8483	45.7431	-0.185725
O88544	Cops4	COP9 signalosome complex subunit 4 OS=Mus musculus OX=10090 GN=Cops4 PE=1 SV=1	12533	10993.3	11845	11604.9	13205.5	14737.2	15659.2	16512.8	0.373733	0.0434106	0.130718	2	-0.807064	0.991671	42.2458	47.8836	42.8781	45.5695	42.3723	43.1557	-0.0192806
O88569	Hnrnpa2b1	Heterogeneous nuclear ribonucleoproteins A2/B1 OS=Mus musculus OX=10090 GN=Hnrnpa2b1 PE=1 SV=2	552935	556415	518067	496863	542784	906984	530939	929891	0.390602	0.116774	0.233953	23	-0.54708	0.634819	476.369	448.513	478.58	414.646	451.003	396.015	-0.15514
O88587	Comt	Catechol O-methyltransferase OS=Mus musculus OX=10090 GN=Comt PE=1 SV=2	41805.9	35975.5	33085	30838.4	36374.2	62703.5	47661.2	69819.1	0.664085	0.0375395	0.119369	4	-0.606433	0.962311	211.608	291.522	173.18	237.143	264.212	219.293	0.121013
O88653	Lamtor3	Ragulator complex protein LAMTOR3 OS=Mus musculus OX=10090 GN=Lamtor3 PE=1 SV=1	5564.46	5042.39	4325	4039.27	8421.28	10103.9	5729.26	10919.3	0.982037	0.00572732	0.0451518	1	-0.725602	1	27.3354	28.1146	26.7148	27.6556	29.2226	25.3941	-0.000192779
O88685	Psmc3	26S proteasome regulatory subunit 6A OS=Mus musculus OX=10090 GN=Psmc3 PE=1 SV=2	23248.8	19808.1	27799.8	22891.4	25746.7	47947.8	24292	32039.6	0.316143	0.113951	0.230967	7	-0.522625	0.990048	115.278	120.073	103.904	116.2	111.878	117.081	0.0272555
O88696	Clpp	"ATP-dependent Clp protease proteolytic subunit, mitochondrial OS=Mus musculus OX=10090 GN=Clpp PE=1 SV=1"	19334.4	17758.3	23186.2	20042.2	24052.5	28382.7	15583.8	26137.5	0.34905	0.386281	0.528717	4	-0.506684	0.552698	41.8001	42.262	39.6387	36.1888	37.5277	34.9266	-0.187317
O88712	Ctbp1	C-terminal-binding protein 1 OS=Mus musculus OX=10090 GN=Ctbp1 PE=1 SV=2	5861.47	5209.63	6807.54	6371.24	3352.47	4414.43	6805.13	4202.67	-0.504653	0.113075	0.229459	2	0.461157	0.967784	123.645	116.131	105.423	118.604	119.59	116.614	0.0426172
O88746	Tom1	Target of Myb protein 1 OS=Mus musculus OX=10090 GN=Tom1 PE=1 SV=1	9919.64	12262.8	20255.5	13262.1	12579.2	22195.7	8932.49	19956.5	0.31315	0.665651	0.763486	5	-0.347637	0.935937	6.08404	5.39988	4.67997	5.30767	5.24656	4.3447	-0.11525
O88844	Idh1	Isocitrate dehydrogenase [NADP] cytoplasmic OS=Mus musculus OX=10090 GN=Idh1 PE=1 SV=2	976564	846214	907398	810860	908106	928694	1.00997e+06	999632	0.136921	0.426903	0.568093	29	-0.38921	0.587534	299.612	356.409	259.227	255.313	248.616	272.267	-0.226548
O88958	Gnpda1	Glucosamine-6-phosphate isomerase 1 OS=Mus musculus OX=10090 GN=Gnpda1 PE=1 SV=3	3206.75	616.481	2986.64	4506.4	2318.19	1534.43	1684.16	3513.27	-0.647304	0.89039	0.925156	2	-0.0831765	0.98805	14.147	16.2697	13.7065	14.9445	13.2056	14.5776	-0.0443435
O88983	Stx8	Syntaxin-8 OS=Mus musculus OX=10090 GN=Stx8 PE=1 SV=1	2396.93	1745.77	2303.56	2075.99	3340.34	4626.83	2712.56	5167.57	0.846177	0.00618292	0.0468277	2	-0.778331	0.996434	23.6078	25.4801	19.831	22.5515	21.1647	26.2306	0.0232457
O88986	Gcat	"2-amino-3-ketobutyrate coenzyme A ligase, mitochondrial OS=Mus musculus OX=10090 GN=Gcat PE=1 SV=2"	741.331	403.859	177.35	1107.05	1142.39	958.808	1118.95	1178.41	1.04705	0.0481058	0.13941	1	-0.743144	0.201023	4.68619	3.78184	3.49893	2.58808	3.31859	2.76892	-0.460883
O89053	Coro1a	Coronin-1A OS=Mus musculus OX=10090 GN=Coro1a PE=1 SV=5	46114.2	32692.2	42507.7	43079.1	41306	49443.9	63059.7	50848.5	0.228641	0.141391	0.264898	7	-0.575609	0.904244	39.9566	45.1661	35.5051	45.9636	41.0376	45.5291	0.140842
O89079	Cope	Coatomer subunit epsilon OS=Mus musculus OX=10090 GN=Cope PE=1 SV=3	4275.7	6124.76	5730.96	6970.18	9541.44	7331.01	9801.58	5054.52	0.497395	0.132685	0.252963	3	-0.548592	0.945905	72.1881	74.8508	68.3211	73.4945	73.9861	76.4222	0.0569243
O89086	Rbm3	RNA-binding protein 3 OS=Mus musculus OX=10090 GN=Rbm3 PE=1 SV=1	2163.1	5424.76	6983.71	8200.26	9744.66	17048	6693.18	12030.3	0.814828	0.0411625	0.12572	3	-0.746615	0.898358	91.677	91.5497	90.7945	81.7913	84.7382	77.9396	-0.165468
O89110	Casp8	Caspase-8 OS=Mus musculus OX=10090 GN=Casp8 PE=1 SV=1	150.756	158.786	21.9395	18.8243	560.444	2587.63	512.313	1895.94	4.1638	0.000990262	0.0238351	1	-0.652773	0.947981	58.0678	54.3557	50.5717	56.9996	54.83	56.6763	0.0500532
P00329	Adh1	Alcohol dehydrogenase 1 OS=Mus musculus OX=10090 GN=Adh1 PE=1 SV=2	255943	180107	206434	215943	171672	146972	162368	159937	-0.389785	0.0342667	0.115172	14	0.750418	0.0551663	177.128	171.393	180.402	128.3	133.63	140.018	-0.396648
P00405	Mtco2	Cytochrome c oxidase subunit 2 OS=Mus musculus OX=10090 GN=Mtco2 PE=1 SV=1	31772.9	56568.8	23669.6	20889.6	27792.2	20357	35338.6	14864.1	-0.205315	0.320892	0.462651	1	0.60645
P00493	Hprt1	Hypoxanthine-guanine phosphoribosyltransferase OS=Mus musculus OX=10090 GN=Hprt1 PE=1 SV=3	50500.1	45706.5	46783.7	59058.1	56570.7	24968.6	46362.6	33504.1	-0.302496	0.180704	0.311293	4	0.356174
P00920	Ca2	Carbonic anhydrase 2 OS=Mus musculus OX=10090 GN=Ca2 PE=1 SV=4	393576	222645	307241	433497	565183	230776	154404	154695	-0.880049	0.298891	0.441585	9	0.140458
P01027	C3	Complement C3 OS=Mus musculus OX=10090 GN=C3 PE=1 SV=3	616756	361324	448187	455896	402773	338989	422631	483371	-0.131721	0.417752	0.560232	43	0.34912	0.733869	936.606	909.382	771.461	759.719	704.333	789.377	-0.212495
P01029	C4b	Complement C4-B OS=Mus musculus OX=10090 GN=C4b PE=1 SV=3	12590.5	12723.6	10114.9	22881.1	37745.5	37183.7	40624.5	34880.1	1.56557	0.000351276	0.01691	9	-0.921771	0.23094	555.013	474.007	444.296	696.045	530.494	780.661	0.434087
P01592	Jchain	Immunoglobulin J chain OS=Mus musculus OX=10090 GN=Jchain PE=1 SV=4	4090.43	5808.53	1291.22	6078.47	4106.76	33741	1104.51	10967.5	0.46137	0.443731	0.583449	1	-0.344536	0.564841	13.681	12.1417	5.84414	12.757	23.6611	14.4608	0.722917
P01756	NA	Ig heavy chain V region MOPC 104E OS=Mus musculus OX=10090 PE=1 SV=1	3431.53	2538.8	4143.29	3191.15	2016.68	19241.6	695.084	19858.1	0.912604	0.602796	0.71551	1	-0.506856	1	1.4448	0.649499	1.10311	0.893258	1.21759	1.05696	0.0504164
P01837	Igkc	Immunoglobulin kappa constant OS=Mus musculus OX=10090 GN=Igkc PE=1 SV=2	48208.6	64505.2	48015.9	57110.7	81166.7	207228	44709.5	214600	1.30549	0.0586164	0.154524	3	-0.611227	0.494315	67.9135	56.6583	33.5648	61.6899	113.806	76.0137	0.682288
P01868	Ighg1	Ig gamma-1 chain C region secreted form OS=Mus musculus OX=10090 GN=Ighg1 PE=1 SV=1	31154	24049.2	20568.6	33956.8	65050.4	92896.5	30526	242836	1.50589	0.0184641	0.0842062	2	-0.635733	0.781155	0.249539	0.213875	0.023307	0.00643501	0.327763	1.27095	0.369236
P01872	Ighm	Immunoglobulin heavy constant mu OS=Mus musculus OX=10090 GN=Ighm PE=1 SV=2	103950	225005	89082.4	138620	169147	333785	74754.8	137605	0.34589	0.601738	0.715132	11	-0.133436	0.798271	833.205	684.289	422.042	493.888	545.276	522.564	-0.257963
P01887	B2m	Beta-2-microglobulin OS=Mus musculus OX=10090 GN=B2m PE=1 SV=2	42901.2	34071.1	36960.4	35690.3	27446	33922.7	30754.8	23315.7	-0.322053	0.0586005	0.154524	2	0.821458	0.560646	1056.9	1079.84	1075.7	1190.64	1150.51	1440.64	0.228265
P01899	H2-D1	"H-2 class I histocompatibility antigen, D-B alpha chain OS=Mus musculus OX=10090 GN=H2-D1 PE=1 SV=2"	59512.7	53297.3	47908.2	68030.6	54558.4	130766	65698.5	76115.5	0.328396	0.144243	0.266262	6	-0.449217	0.179072	961.362	969.934	883.541	1073.93	1177.82	1219.9	0.301767
P01901	H2-K1	"H-2 class I histocompatibility antigen, K-B alpha chain OS=Mus musculus OX=10090 GN=H2-K1 PE=1 SV=1"	3872.43	5858.4	7308.2	11104.1	6488.3	13759.2	6775.8	5946.48	0.019104	0.538573	0.663831	3	-0.353941	0.595988	763.151	687.733	672.135	733.843	855.234	844.121	0.195557
P01942	Hba	Hemoglobin subunit alpha OS=Mus musculus OX=10090 GN=Hba PE=1 SV=2	2.36201e+07	2.40859e+07	2.78427e+07	3.52579e+07	6.28616e+07	6.33731e+07	2.36946e+07	3.67189e+07	0.891609	0.0819957	0.190481	8	-0.610204
P02088	Hbb-b1	Hemoglobin subunit beta-1 OS=Mus musculus OX=10090 GN=Hbb-b1 PE=1 SV=2	1.99016e+07	2.09575e+07	2.15316e+07	3.12147e+07	4.00683e+07	3.35376e+07	1.85942e+07	2.29703e+07	0.385816	0.378665	0.521229	9	-0.462949
P02089	Hbb-b2	Hemoglobin subunit beta-2 OS=Mus musculus OX=10090 GN=Hbb-b2 PE=1 SV=2	172132	138914	106624	163853	365819	280974	166535	195339	0.634914	0.0277843	0.104816	1	-0.586134
P02468	Lamc1	Laminin subunit gamma-1 OS=Mus musculus OX=10090 GN=Lamc1 PE=1 SV=2	613674	722969	796621	721879	1.34003e+06	1.60896e+06	837605	1.22083e+06	0.82415	0.00725302	0.051304	50	-0.759963	0.802461	350.157	407.792	319.477	417.346	396.525	424.962	0.208146
P02469	Lamb1	Laminin subunit beta-1 OS=Mus musculus OX=10090 GN=Lamb1 PE=1 SV=3	270511	297011	404457	397787	585413	636861	395040	516342	0.677633	0.0185448	0.0842286	44	-0.836387	0.810645	197.529	202.261	164.761	212.43	207.14	233.3	0.213709
P02662	CSN1S1	Alpha-S1-casein OS=Bos taurus GN=CSN1S1 PE=1 SV=2	2.94459e+06	18601.1	9893.95	50132.1	79800	619795	8909.46	74373.3	1.33503	0.971931	0.983853	10	0.488428
P02663	CSN1S2	Alpha-S2-casein OS=Bos taurus GN=CSN1S2 PE=1 SV=2	1.21814e+06	8599.5	5205.09	27141.8	34833	187974	4178.03	18253	0.722872	0.829944	0.885018	13	0.510672
P02666	CSN2	Beta-casein OS=Bos taurus GN=CSN2 PE=1 SV=2	569625	7149.04	4241.74	17439.9	24422.8	404388	3712.45	37354.8	1.43565	0.765059	0.833723	2	0.285509
P02802	Mt1	Metallothionein-1 OS=Mus musculus OX=10090 GN=Mt1 PE=1 SV=1	4363.63	3500.03	7314.33	4248.46	1672.87	2793.66	156.47	4257.26	-0.993993	0.0815498	0.190163	2	0.46664	0.959346	118.013	89.3509	123.83	84.1364	100.73	95.2733	-0.231139
P03953	Cfd	Complement factor D OS=Mus musculus OX=10090 GN=Cfd PE=1 SV=1	6939.01	8969.51	13517.9	11487.9	6817.21	4085.13	3944.04	2026.57	-1.33851	0.00570627	0.0451518	2	0.615203
P03987	NA	Ig gamma-3 chain C region OS=Mus musculus OX=10090 PE=1 SV=2	213.062	2171.95	156.336	2270.99	43.5947	2080.18	1436.32	99.4486	-0.847934	0.545665	0.667272	1	0.135306	1	1.4448	0.649499	1.10311	0.893258	1.21759	1.05696	0.0504164
P04117	Fabp4	"Fatty acid-binding protein, adipocyte OS=Mus musculus OX=10090 GN=Fabp4 PE=1 SV=3"	3.85951e+07	2.79744e+07	3.49622e+07	4.24009e+07	4.90142e+07	3.66105e+07	3.08829e+07	3.70516e+07	0.00378935	0.674151	0.769634	25	-0.345686	0.967955	12459.4	11229.2	9056.53	11610.4	13209.9	10587.7	0.119305
P04919	Slc4a1	Band 3 anion transport protein OS=Mus musculus OX=10090 GN=Slc4a1 PE=1 SV=1	98582.2	88186.9	96796.3	120477	116589	105838	70675.6	47058	-0.175643	0.297804	0.440354	8	0.278312	0.980525	1.26247	0.545779	0.833162	0.577943	1.16816	0.45388	-0.301897
P05064	Aldoa	Fructose-bisphosphate aldolase A OS=Mus musculus OX=10090 GN=Aldoa PE=1 SV=2	3.74763e+06	2.85619e+06	3.34601e+06	2.36794e+06	3.46834e+06	4.7096e+06	3.05976e+06	4.12469e+06	0.290999	0.168071	0.297802	35	-0.388435	0.710121	916.793	1084.19	783.305	769.947	881.508	751.266	-0.203554
P05132	Prkaca	cAMP-dependent protein kinase catalytic subunit alpha OS=Mus musculus OX=10090 GN=Prkaca PE=1 SV=3	150455	120036	133256	123252	150226	218800	158054	205379	0.491443	0.0352392	0.116545	12	-0.668765	0.972198	137.198	152.599	118.481	134.981	131.677	129.863	-0.0346425
P05202	Got2	"Aspartate aminotransferase, mitochondrial OS=Mus musculus OX=10090 GN=Got2 PE=1 SV=1"	105122	48641.7	76787.3	80687.3	60654.2	46750.3	45906	72159.8	-0.563813	0.138718	0.261019	11	0.440379	0.992257	23.8306	22.5137	26.4786	24.3645	18.7671	28.3705	-0.043689
P05977	Myl1	"Myosin light chain 1/3, skeletal muscle isoform OS=Mus musculus OX=10090 GN=Myl1 PE=1 SV=2"	23022.2	21638.2	23839	24460.4	30469.5	47602	31737.3	44686.7	0.684836	0.00597293	0.0462102	1	-0.794153
P06151	Ldha	L-lactate dehydrogenase A chain OS=Mus musculus OX=10090 GN=Ldha PE=1 SV=3	2.17621e+06	1.83972e+06	1.59165e+06	1.41859e+06	1.09257e+06	1.03245e+06	1.35894e+06	1.06438e+06	-0.666134	0.0104661	0.0600586	23	0.945265	0.338935	742.001	972.444	593.411	554.843	600.495	492.585	-0.461155
P06728	Apoa4	Apolipoprotein A-IV OS=Mus musculus OX=10090 GN=Apoa4 PE=1 SV=3	61767.3	46790.6	76211.5	85232.9	287687	334209	147318	276715	2.03995	0.000153902	0.0156936	15	-0.856815	0.48225	0.107728	0.421315	0.327003	0.124678	0.0805877	0.22043	-0.914813
P06745	Gpi	Glucose-6-phosphate isomerase OS=Mus musculus OX=10090 GN=Gpi PE=1 SV=4	347148	189596	246991	269936	230931	151211	128028	186803	-0.6195	0.0437693	0.131006	18	0.604518
P06800	Ptprc	Receptor-type tyrosine-protein phosphatase C OS=Mus musculus OX=10090 GN=Ptprc PE=1 SV=4	375.659	142.329	536.549	368.779	187.582	1524.01	553.269	251.089	0.00199873	0.497755	0.630563	1	-0.270717	0.970977	42.5091	47.6969	40.4148	43.0075	46.7226	47.3967	0.072314
P06801	Me1	NADP-dependent malic enzyme OS=Mus musculus OX=10090 GN=Me1 PE=1 SV=2	2.79767e+06	1.1615e+06	1.11988e+06	892163	593414	459345	416476	458265	-1.31371	0.00209746	0.0309485	26	0.810979	0.258191	490.834	741.459	258.181	267.078	314.043	216.92	-0.789534
P06909	Cfh	Complement factor H OS=Mus musculus OX=10090 GN=Cfh PE=1 SV=2	19655.1	26562.9	18949.2	21284.8	18187.3	30139.9	23811.7	26990.7	0.309704	0.396452	0.538143	6	-0.281034	0.942894	175.467	203.941	179.271	181.056	167.715	171.378	-0.100621
P07309	Ttr	Transthyretin OS=Mus musculus OX=10090 GN=Ttr PE=1 SV=1	154197	93057	126442	144521	107782	86654.5	44784.2	90768.9	-0.608068	0.0466058	0.137006	6	0.558685	0.985831	2.90343	13.5938	7.70006	3.37636	2.87367	15.239	-0.346478
P07310	Ckm	Creatine kinase M-type OS=Mus musculus OX=10090 GN=Ckm PE=1 SV=1	4938.82	3108.7	1675.12	3006.04	4030.56	9176.78	2765.93	4339.1	0.4521	0.17371	0.303729	2	-0.285416
P07356	Anxa2	Annexin A2 OS=Mus musculus OX=10090 GN=Anxa2 PE=1 SV=2	992320	2.10802e+06	727992	1.13714e+06	1.09085e+06	1.51025e+06	3.31391e+06	1.43149e+06	0.469008	0.225248	0.363502	33	-0.209742	0.820935	768.499	971.822	642.458	1069.18	963.571	981.078	0.358285
P07724	Alb	Serum albumin OS=Mus musculus OX=10090 GN=Alb PE=1 SV=3	3.38924e+07	1.46063e+07	3.13609e+07	3.33552e+07	3.40642e+07	4.0042e+07	1.49995e+07	4.46393e+07	0.191445	0.628809	0.736301	57	-0.408786	0.980326	39.4906	124.076	86.1716	42.8499	34.5863	145.212	-0.3241
P07758	Serpina1a	Alpha-1-antitrypsin 1-1 OS=Mus musculus OX=10090 GN=Serpina1a PE=1 SV=4	113892	74631	92405.4	109724	118513	57474.4	57604.1	77407.6	-0.592571	0.200836	0.335307	6	0.304319	0.834604	1.1004	4.6116	2.72282	0.676479	0.920984	3.85835	-0.841018
P07759	Serpina3k	Serine protease inhibitor A3K OS=Mus musculus OX=10090 GN=Serpina3k PE=1 SV=2	605614	451374	519362	750884	1.0407e+06	1.08823e+06	660828	1.35648e+06	0.924129	0.0131388	0.0692422	13	-0.830554	0.286148	12.4858	49.9995	24.1165	7.69224	13.4528	20.1804	-0.949963
P07901	Hsp90aa1	Heat shock protein HSP 90-alpha OS=Mus musculus OX=10090 GN=Hsp90aa1 PE=1 SV=4	451990	359095	380546	355334	383140	321148	345530	375507	-0.0373917	0.48428	0.618921	16	0.503694	0.943765	108.086	126.42	111.8	106.051	99.3957	110.525	-0.130317
P08003	Pdia4	Protein disulfide-isomerase A4 OS=Mus musculus OX=10090 GN=Pdia4 PE=1 SV=3	511782	484460	511370	470507	421454	556087	492191	550621	0.0647675	0.888336	0.924061	31	-0.0936339	0.989171	109.262	103.415	93.3928	107.135	97.8138	110.934	0.0465388
P08032	Spta1	"Spectrin alpha chain, erythrocytic 1 OS=Mus musculus OX=10090 GN=Spta1 PE=1 SV=3"	74411.1	67548.5	78387	68244.8	121277	120407	66201	69885.7	0.364301	0.208711	0.344801	22	-0.417418
P08074	Cbr2	Carbonyl reductase [NADPH] 2 OS=Mus musculus OX=10090 GN=Cbr2 PE=1 SV=1	52476.5	38692.8	45032.8	65066.9	38069.9	67685.5	45233.8	71849.2	0.186801	0.653423	0.755929	5	-0.38842	0.986468	40.6251	40.5817	32.0801	38.1596	29.6675	41.5215	-0.0566969
P08113	Hsp90b1	Endoplasmin OS=Mus musculus OX=10090 GN=Hsp90b1 PE=1 SV=2	921301	842988	897065	886321	792060	1.10495e+06	859360	1.07464e+06	0.108	0.577347	0.695787	40	-0.358186	0.992257	395.152	403.706	363.8	414.626	360.512	414.476	0.0314303
P08207	S100a10	Protein S100-A10 OS=Mus musculus OX=10090 GN=S100a10 PE=1 SV=2	288295	291639	270205	330116	389789	417286	463135	397072	0.489355	0.00942023	0.057891	7	-0.857389	0.68552	240.355	220.785	203.887	282.706	260.01	278.823	0.307212
P08226	Apoe	Apolipoprotein E OS=Mus musculus OX=10090 GN=Apoe PE=1 SV=2	64489.1	66687.5	107093	104638	245677	348462	114638	283713	1.66015	0.00321141	0.0361189	15	-0.797448	0.44314	2700.51	2569.03	2301.63	2892.17	3271.03	2974.83	0.272533
P08228	Sod1	Superoxide dismutase [Cu-Zn] OS=Mus musculus OX=10090 GN=Sod1 PE=1 SV=2	5165.09	1674.89	3034.61	2222.15	3955.39	2505.53	1349.8	4035.51	0.277734	0.951349	0.969816	2	0.0650858	0.838057	356.904	334.607	310.215	298.629	334.484	289.172	-0.119682
P08249	Mdh2	"Malate dehydrogenase, mitochondrial OS=Mus musculus OX=10090 GN=Mdh2 PE=1 SV=3"	2.53058e+06	1.47214e+06	2.43754e+06	2.33988e+06	2.41493e+06	2.41165e+06	1.19406e+06	1.89581e+06	-0.159512	0.561114	0.682393	26	0.103271	0.794901	301.253	327.202	238.171	252.416	278.45	239.584	-0.159801
P08752	Gnai2	Guanine nucleotide-binding protein G(i) subunit alpha-2 OS=Mus musculus OX=10090 GN=Gnai2 PE=1 SV=5	275923	269443	235749	262653	317764	454678	399403	322589	0.432201	0.0188147	0.0849112	13	-0.635844	0.417912	313.347	306.064	294.929	353.356	333.199	353.118	0.185233
P09055	Itgb1	Integrin beta-1 OS=Mus musculus OX=10090 GN=Itgb1 PE=1 SV=1	33353.4	29743.6	38974	45492.4	52394.4	70154.7	39172.8	52066.9	0.534715	0.0467248	0.137006	9	-0.744362	0.575038	461.864	492.946	439.116	542.013	479.477	578.475	0.196181
P09103	P4hb	Protein disulfide-isomerase OS=Mus musculus OX=10090 GN=P4hb PE=1 SV=2	907365	816021	961765	902619	1.04933e+06	1.32503e+06	963852	1.32287e+06	0.380599	0.061762	0.15999	34	-0.761989	0.997854	443.753	490.416	422.177	461.155	434.541	477.839	0.0198859
P09405	Ncl	Nucleolin OS=Mus musculus OX=10090 GN=Ncl PE=1 SV=2	49291.3	56388	35469.5	44987.1	37554.6	56426	57287.1	63269.2	0.271863	0.404121	0.546288	12	-0.22827	0.943501	237.053	243.313	222.244	226.836	214.728	235.596	-0.0532318
P09411	Pgk1	Phosphoglycerate kinase 1 OS=Mus musculus OX=10090 GN=Pgk1 PE=1 SV=4	422290	437485	401314	420553	473273	648442	476532	523489	0.245105	0.0772263	0.184598	23	-0.622184	0.222273	34.2233	40.7269	28.1489	28.3651	25.8857	28.6234	-0.300191
P09528	Fth1	Ferritin heavy chain OS=Mus musculus OX=10090 GN=Fth1 PE=1 SV=2	25557	10927.8	20618.9	19510.2	19850.3	20591.2	9961.75	24864.9	0.0114991	0.917555	0.943133	3	-0.077008	0.817731	1653.22	1562.11	1594.64	1402.35	1511.73	1420.88	-0.150393
P09602	Hmgn2	Non-histone chromosomal protein HMG-17 OS=Mus musculus OX=10090 GN=Hmgn2 PE=1 SV=2	6191.84	10536.8	10633.3	10328.8	13162.8	66013.1	33526.7	66476.7	2.17298	0.00344256	0.0363778	6	-0.716726	0.528502	41.9824	47.0746	43.0637	39.7755	39.1838	32.8061	-0.245035
P09671	Sod2	"Superoxide dismutase [Mn], mitochondrial OS=Mus musculus OX=10090 GN=Sod2 PE=1 SV=3"	64864.8	48787.3	67262.1	73083	38927.8	16103	19964.4	13852.2	-1.88123	0.000828485	0.0218861	4	0.75294	0.655975	139.953	156.665	116.305	118.447	123.174	122.295	-0.171748
P09813	Apoa2	Apolipoprotein A-II OS=Mus musculus OX=10090 GN=Apoa2 PE=1 SV=2	26114	29653.5	30593.7	22488.6	51806.6	39000.2	22866.7	44670.6	0.584891	0.101574	0.216251	3	-0.581014	0.862644	3.26808	12.2869	11.1757	2.80486	3.36802	12.4571	-0.643687
P0C0A3	Chmp6	Charged multivesicular body protein 6 OS=Mus musculus OX=10090 GN=Chmp6 PE=1 SV=2	6332.43	5268.76	4123.91	7541.57	6278.6	11315.6	8062.13	7063.11	0.385622	0.0890481	0.19838	1	-0.530015	0.991218	25.1272	25.5216	21.8219	24.4236	25.0453	24.2074	0.0271738
P0C0S6	H2afz	Histone H2A.Z OS=Mus musculus OX=10090 GN=H2afz PE=1 SV=2	18607.3	26950.2	21006.6	39325.3	10990.9	11244.7	12905.6	11766.5	-1.0486	0.00148454	0.0275271	1	0.557858	0.518269	28.6927	29.048	26.3098	29.2322	28.5058	53.836	0.344218
P0C8K7	Smim1	Small integral membrane protein 1 OS=Mus musculus OX=10090 GN=Smim1 PE=1 SV=1	5557.02	5863.74	5585.21	6019.6	4099.27	8513.82	6629.6	8534.43	0.392648	0.415039	0.558001	1	-0.428878	0.500417	70.6282	68.0053	72.2016	61.414	55.8434	52.0657	-0.319212
P0DOV2	Ifi204	Interferon-activable protein 204 OS=Mus musculus OX=10090 GN=Ifi204 PE=1 SV=1	6745.73	4823.91	6089.3	4613.74	2827.63	4859.08	2378.53	3563.03	-0.771892	0.0177366	0.0813161	4	0.769752	0.872993	30.8807	30.3757	31.557	28.7395	25.0453	28.7013	-0.172963
P0DP26	Calm1	Calmodulin-1 OS=Mus musculus OX=10090 GN=Calm1 PE=1 SV=1	29327.7	16957.3	20581.3	16522.6	26208.3	37612.5	20469.4	35553.8	0.708392	0.0861696	0.195461	5	-0.480794	0.991324	449.83	482.968	425.281	469.806	432.143	478.87	0.0244937
P10107	Anxa1	Annexin A1 OS=Mus musculus OX=10090 GN=Anxa1 PE=1 SV=2	211348	482074	224846	297851	253266	560833	781224	569562	1.12695	0.071617	0.176296	24	-0.491826	0.868224	372.179	465.336	314.5	461.844	382.56	449.591	0.181459
P10126	Eef1a1	Elongation factor 1-alpha 1 OS=Mus musculus OX=10090 GN=Eef1a1 PE=1 SV=3	3.12163e+06	3.07629e+06	3.20207e+06	3.55712e+06	3.75931e+06	3.6115e+06	3.89287e+06	4.9249e+06	0.274999	0.0878907	0.197192	29	-0.826423	1	1816.99	1893.66	1647.25	1791.69	1714.34	1900.85	0.0142754
P10493	Nid1	Nidogen-1 OS=Mus musculus OX=10090 GN=Nid1 PE=1 SV=2	105567	111702	134666	133171	217323	161941	123050	168562	0.437911	0.0609276	0.159008	16	-0.742288	0.531226	653.551	730.901	550.573	923.978	822.78	957.811	0.489732
P10518	Alad	Delta-aminolevulinic acid dehydratase OS=Mus musculus OX=10090 GN=Alad PE=1 SV=1	80018.5	29973.6	64804.2	72238.7	70273.9	18559.9	19702.9	45754.7	-1.18827	0.135945	0.257478	10	0.327479	0.114799	74.5381	73.7099	70.4469	54.3786	57.4006	50.3537	-0.433391
P10605	Ctsb	Cathepsin B OS=Mus musculus OX=10090 GN=Ctsb PE=1 SV=2	137629	64918.9	100273	109762	36845.9	13935.1	27130.8	16726.8	-2.30004	0.000203433	0.0156936	11	0.809647	0.98805	1377.7	1596.4	1190.09	1405.25	1346.94	1517.45	0.0446676
P10630	Eif4a2	Eukaryotic initiation factor 4A-II OS=Mus musculus OX=10090 GN=Eif4a2 PE=1 SV=2	8622.32	7577.33	12753.8	9448.25	5095.11	3101.73	4906.31	3424.18	-1.13886	0.00078604	0.0218861	2	0.709586	0.910395	246.129	233.314	263.749	253.953	275.558	256.898	0.082419
P10639	Txn	Thioredoxin OS=Mus musculus OX=10090 GN=Txn PE=1 SV=3	248001	183281	207643	164642	237176	232496	177207	244488	0.267501	0.442173	0.581842	5	-0.204462
P10649	Gstm1	Glutathione S-transferase Mu 1 OS=Mus musculus OX=10090 GN=Gstm1 PE=1 SV=2	1.57647e+06	1.23888e+06	1.31091e+06	1.20097e+06	1.00968e+06	776441	1.36528e+06	1.06611e+06	-0.296681	0.118945	0.23639	18	0.66303	0.976728	352.933	297.164	398.607	388.514	324.82	387.922	0.0759164
P10711	Tcea1	Transcription elongation factor A protein 1 OS=Mus musculus OX=10090 GN=Tcea1 PE=1 SV=2	1560.06	812.191	2195.84	1245.19	2207.95	3018.05	361.462	5451.4	0.889181	0.543552	0.666649	2	-0.533441	0.832015	15.322	14.8177	12.3398	13.1905	12.3405	13.1185	-0.130579
P10833	Rras	Ras-related protein R-Ras OS=Mus musculus OX=10090 GN=Rras PE=1 SV=1	64828.5	75473.8	63065.3	79819.8	53201.1	46083.6	65016.4	41094.5	-0.498446	0.0355109	0.116842	6	0.695025	0.808843	129.824	127.81	125.855	142.076	138.178	132.333	0.105013
P10852	Slc3a2	4F2 cell-surface antigen heavy chain OS=Mus musculus OX=10090 GN=Slc3a2 PE=1 SV=1	46588.5	51480.3	40904	61837.6	36447.6	73266.9	64147.9	59173.6	0.33118	0.478476	0.613313	8	-0.357719	0.893292	108.532	100.968	97.054	105.873	106.984	116.478	0.103641
P10922	H1f0	Histone H1.0 OS=Mus musculus OX=10090 GN=H1f0 PE=2 SV=4	239119	409329	237133	269108	249542	338746	328562	398450	0.395229	0.404864	0.546866	10	-0.201061	0.00501908	106.547	112.854	104.697	88.0976	83.354	79.3209	-0.370631
P11152	Lpl	Lipoprotein lipase OS=Mus musculus OX=10090 GN=Lpl PE=1 SV=3	60539	52716.2	43052.7	49538.5	19057.6	29683.9	40747.6	21297.6	-1.02321	0.00584798	0.0454464	6	0.897411	0.741936	10349	11469	8633.23	7869.4	8573.02	7981.37	-0.309432
P11276	Fn1	Fibronectin OS=Mus musculus OX=10090 GN=Fn1 PE=1 SV=4	6249.36	14342.6	6617.25	10281	11236.9	17965.6	34294.2	22187.2	1.27535	0.0160362	0.077845	7	-0.592295	0.0682381	493.488	562.086	405.322	908.665	607.44	833.888	0.677824
P11352	Gpx1	Glutathione peroxidase 1 OS=Mus musculus OX=10090 GN=Gpx1 PE=1 SV=2	141624	126832	136406	164276	188324	135241	125051	147780	0.0245073	0.765263	0.833723	8	-0.336043	0.527607	711.268	495.477	475.054	684.496	775.149	661.057	0.355663
P11404	Fabp3	"Fatty acid-binding protein, heart OS=Mus musculus OX=10090 GN=Fabp3 PE=1 SV=5"	4426.72	486.106	10882.6	37574.5	61658.9	21035	4028.38	2875.03	0.40736	0.48742	0.62156	1	-0.361944
P11499	Hsp90ab1	Heat shock protein HSP 90-beta OS=Mus musculus OX=10090 GN=Hsp90ab1 PE=1 SV=3	1.85791e+06	1.32877e+06	1.28911e+06	1.33172e+06	1.3747e+06	1.15562e+06	1.17585e+06	1.2286e+06	-0.146326	0.240933	0.380326	33	0.64829	0.949289	722.289	729.843	586.915	697.168	713.355	753.367	0.0920552
P11531	Dmd	Dystrophin OS=Mus musculus OX=10090 GN=Dmd PE=1 SV=3	6551.35	1575.28	2688.81	10861	9667.53	1571.35	34756.6	26168	1.92206	0.20308	0.338402	3	-0.575476	0.70557	26.2009	27.3678	31.3714	31.2226	28.6541	41.2297	0.237823
P11679	Krt8	"Keratin, type II cytoskeletal 8 OS=Mus musculus OX=10090 GN=Krt8 PE=1 SV=4"	139764	63127.2	79366.7	92504.7	48846.4	100162	109545	170775	0.289828	0.759782	0.831467	14	-0.188697	0.902532	21.6427	16.2697	40.4317	19.3983	3.56576	33.5064	-0.872969
P11983	Tcp1	T-complex protein 1 subunit alpha OS=Mus musculus OX=10090 GN=Tcp1 PE=1 SV=3	84469.2	92766.8	98934.2	95198.5	107517	139134	130798	113973	0.377672	0.0326527	0.112054	15	-0.773008	0.901467	165.459	189.814	157.422	166.591	164.922	155.737	-0.0694979
P12382	Pfkl	"ATP-dependent 6-phosphofructokinase, liver type OS=Mus musculus OX=10090 GN=Pfkl PE=1 SV=4"	69282	51929.4	49034.4	35921.1	34096.4	45957.8	47002.5	49056.9	-0.118649	0.407421	0.549464	10	0.607163	0.635065	92.3658	118.517	82.2911	78.6381	88.6436	74.3017	-0.266158
P12787	Cox5a	"Cytochrome c oxidase subunit 5A, mitochondrial OS=Mus musculus OX=10090 GN=Cox5a PE=1 SV=2"	2210.98	3401.91	972.763	1278.83	2085.63	3434.63	3668.34	1789.25	0.670559	0.202388	0.337572	1	-0.0740481	0.340502	97.8153	99.8059	80.2664	70.8341	85.0595	70.5082	-0.294425
P12970	Rpl7a	60S ribosomal protein L7a OS=Mus musculus OX=10090 GN=Rpl7a PE=1 SV=2	118275	193122	102083	126119	117885	135453	177079	169182	0.30972	0.486493	0.620834	12	-0.0914332	0.835542	218.051	215.308	203.061	196.901	191.172	204.022	-0.103972
P13020	Gsn	Gelsolin OS=Mus musculus OX=10090 GN=Gsn PE=1 SV=3	508782	517599	622528	542866	753715	864022	682572	1.1393e+06	0.606329	0.0117631	0.0653383	23	-0.817555	0.78703	10436.4	8613.98	8201.81	10530.8	11072.4	10903.9	0.262011
P13516	Scd1	Acyl-CoA desaturase 1 OS=Mus musculus OX=10090 GN=Scd1 PE=1 SV=2	190890	198349	115926	165450	165553	172768	238064	117432	-0.0715041	0.898492	0.932387	8	0.178519	0.927991	36003.4	36659.1	22377.9	34352.1	40809.7	30497.1	0.177868
P13634	Ca1	Carbonic anhydrase 1 OS=Mus musculus OX=10090 GN=Ca1 PE=1 SV=4	74063.5	41781.4	73843.8	118217	105252	68007.7	42985	43552.6	-0.442392	0.530304	0.657851	7	-0.00670708
P13707	Gpd1	"Glycerol-3-phosphate dehydrogenase [NAD(+)], cytoplasmic OS=Mus musculus OX=10090 GN=Gpd1 PE=1 SV=3"	2.55051e+06	2.17605e+06	2.12952e+06	1.8129e+06	1.38645e+06	1.40537e+06	1.33507e+06	1.3924e+06	-0.631635	0.0031654	0.0358539	27	0.962288	0.256174	666.112	975.327	405.119	421.405	437.433	396.248	-0.616442
P14069	S100a6	Protein S100-A6 OS=Mus musculus OX=10090 GN=S100a6 PE=1 SV=3	181942	115918	197474	176577	129315	188680	171047	243174	0.00327735	0.655553	0.75679	5	-0.371093	0.4109	177.918	177.264	163.732	238.463	195.918	246.918	0.386533
P14106	C1qb	Complement C1q subcomponent subunit B OS=Mus musculus OX=10090 GN=C1qb PE=1 SV=2	3885.42	4933.48	2602.67	3884.12	2814.51	4269.44	5643.48	4365.61	0.152287	0.587056	0.704548	1	-0.0681004	0.987285	110.477	126.918	93.0216	119.412	92.9197	129.979	0.0483355
P14115	Rpl27a	60S ribosomal protein L27a OS=Mus musculus OX=10090 GN=Rpl27a PE=1 SV=5	32588.7	45322.5	17269.9	27460	15158.5	7846.59	23368.5	11757.1	-1.16402	0.0205768	0.0893725	3	0.813424	0.936727	96.4783	89.8695	81.0425	90.7186	98.061	92.8804	0.0779124
P14131	Rps16	40S ribosomal protein S16 OS=Mus musculus OX=10090 GN=Rps16 PE=1 SV=4	152508	131416	76111.5	93959.3	114719	116228	110619	129508	0.0554091	0.671278	0.767584	9	0.202776	0.936864	53.2057	48.0081	53.7943	48.1511	48.873	51.6182	-0.0592747
P14148	Rpl7	60S ribosomal protein L7 OS=Mus musculus OX=10090 GN=Rpl7 PE=1 SV=2	215480	297037	185693	202278	166656	291834	251772	302011	0.376685	0.542834	0.666507	14	-0.131711	0.90079	331.398	331.33	329.381	315.637	311.126	314.249	-0.0763058
P14152	Mdh1	"Malate dehydrogenase, cytoplasmic OS=Mus musculus OX=10090 GN=Mdh1 PE=1 SV=3"	1.85144e+06	1.11664e+06	1.63613e+06	1.80858e+06	2.20151e+06	1.79142e+06	1.05006e+06	2.00975e+06	0.141489	0.700021	0.789992	18	-0.345882	0.376234	621.219	645.933	468.642	470.496	479.576	462.178	-0.283528
P14206	Rpsa	40S ribosomal protein SA OS=Mus musculus OX=10090 GN=Rpsa PE=1 SV=4	84140.6	97916.1	88095	129016	139242	144926	124913	160007	0.613081	0.0210012	0.0898643	8	-0.913293	0.696566	346.754	327.534	302.808	285.229	306.529	279.718	-0.163948
P14211	Calr	Calreticulin OS=Mus musculus OX=10090 GN=Calr PE=1 SV=1	379511	203226	358203	415660	243322	166962	147574	203442	-1.00039	0.0161147	0.0780077	18	0.535466	0.997488	377.345	381.841	363.935	386.386	358.609	397.396	0.023497
P14602	Hspb1	Heat shock protein beta-1 OS=Mus musculus OX=10090 GN=Hspb1 PE=1 SV=3	73344.2	69491.4	101297	114141	121608	247010	102582	228498	0.951537	0.0255822	0.101553	10	-0.731619	0.561905	41.7393	35.3335	27.9633	45.7862	48.4528	41.969	0.391614
P14685	Psmd3	26S proteasome non-ATPase regulatory subunit 3 OS=Mus musculus OX=10090 GN=Psmd3 PE=1 SV=3	38767.9	42522.4	34721.9	33013.9	28479.7	11642	35627.7	27487.8	-0.39099	0.0897776	0.199001	9	0.678797	0.969368	82.8442	86.1978	72.0329	80.7271	87.0369	81.169	0.0496341
P14733	Lmnb1	Lamin-B1 OS=Mus musculus OX=10090 GN=Lmnb1 PE=1 SV=3	263892	230378	236822	228751	224970	520807	339404	621929	0.847974	0.043638	0.131006	32	-0.632249	0.961622	8.10991	8.78115	8.44242	9.66296	8.50927	8.70243	0.0837219
P14824	Anxa6	Annexin A6 OS=Mus musculus OX=10090 GN=Anxa6 PE=1 SV=3	172968	329571	142818	197637	201657	217993	424226	203979	0.189674	0.376962	0.520123	30	-0.110809	0.0166603	382.794	458.947	360.594	562.785	574.393	579.953	0.521762
P14869	Rplp0	60S acidic ribosomal protein P0 OS=Mus musculus OX=10090 GN=Rplp0 PE=1 SV=3	173623	141043	119447	133241	100732	107247	110517	109456	-0.339441	0.0422963	0.128146	9	0.870289	0.899625	405.2	410.883	383.76	379.764	366.197	388.778	-0.0802992
P15105	Glul	Glutamine synthetase OS=Mus musculus OX=10090 GN=Glul PE=1 SV=6	1.27295e+06	1.23725e+06	1.65601e+06	871150	801405	1.15485e+06	859014	1.02357e+06	-0.420473	0.143896	0.266207	19	0.587898	0.189958	1007.19	908.304	1099.76	767.976	648.101	748.231	-0.477927
P15327	Bpgm	Bisphosphoglycerate mutase OS=Mus musculus OX=10090 GN=Bpgm PE=1 SV=2	29679	32865.9	37303.1	37413.2	41306.1	29885.6	23572.1	22005.1	-0.399678	0.263329	0.404564	5	0.268636	0.9934	29.969	27.2018	31.9451	29.9219	33.0291	27.534	0.0211287
P15508	Sptb	"Spectrin beta chain, erythrocytic OS=Mus musculus OX=10090 GN=Sptb PE=1 SV=4"	16014.6	19804.5	20122.9	18511.6	35683	31756.2	21157.3	13039.4	0.436968	0.290531	0.431127	8	-0.3704	0.854502	6.81335	5.87699	6.38404	7.21927	5.56788	11.3676	0.27931
P15626	Gstm2	Glutathione S-transferase Mu 2 OS=Mus musculus OX=10090 GN=Gstm2 PE=1 SV=2	266483	161686	200514	172420	117727	59940	145519	85347.8	-0.891379	0.00838981	0.055074	15	0.81942	1	117.405	117.48	126.378	118.21	105.056	137.197	-0.0109638
P15864	Hist1h1c	Histone H1.2 OS=Mus musculus OX=10090 GN=Hist1h1c PE=1 SV=2	1.2089e+06	1.07109e+06	969987	734636	1.17169e+06	2.92537e+06	1275107	2.87219e+06	0.908824	0.026865	0.102775	10	-0.587306	0.910764	72.5325	85.1606	54.233	61.0987	72.3547	61.1896	-0.102822
P16015	Ca3	Carbonic anhydrase 3 OS=Mus musculus OX=10090 GN=Ca3 PE=1 SV=3	4.76082e+07	2.73254e+07	4.80059e+07	4.45898e+07	5.61793e+07	5.75225e+07	2.99323e+07	6.87426e+07	0.303122	0.329663	0.470254	20	-0.55119
P16045	Lgals1	Galectin-1 OS=Mus musculus OX=10090 GN=Lgals1 PE=1 SV=3	1.18617e+06	1.99811e+06	1.48801e+06	1.64783e+06	1.72916e+06	2.02365e+06	1.94383e+06	1.52465e+06	0.227509	0.32931	0.470254	11	-0.32096	0.991317	1168.28	1318.16	990.526	1277.01	1340.69	1126.4	0.112759
P16110	Lgals3	Galectin-3 OS=Mus musculus OX=10090 GN=Lgals3 PE=1 SV=3	15462.9	18032.4	25292.8	27646.4	17832.2	18420.7	22380.4	18879.1	-0.195604	0.593793	0.710174	6	-0.0705132	0.939602	91.1502	139.385	86.3403	106.879	102.683	135.679	0.146956
P16125	Ldhb	L-lactate dehydrogenase B chain OS=Mus musculus OX=10090 GN=Ldhb PE=1 SV=2	134693	117367	106389	100708	85219.4	97383.4	95168.3	102764	-0.21504	0.13542	0.256765	12	0.835943	0.936864	56.4674	52.551	55.1947	42.8104	39.3815	68.3293	-0.169227
P16254	Srp14	Signal recognition particle 14 kDa protein OS=Mus musculus OX=10090 GN=Srp14 PE=1 SV=1	4210.71	6544.36	3382.65	4547.71	3700.77	8812.38	4670.48	3704.04	-0.0732662	0.759153	0.831467	3	0.010044	0.96566	67.3058	71.9881	61.8591	64.4095	64.8406	65.9559	-0.0406009
P16332	Mmut	"Methylmalonyl-CoA mutase, mitochondrial OS=Mus musculus OX=10090 GN=Mmut PE=1 SV=2"	95301.7	78876.5	100195	79210.7	70985.5	73305.9	68505.1	59736.2	-0.317231	0.0490527	0.14051	13	0.787033	0.927188	131.323	149.695	117.081	120.378	131.207	119.066	-0.0971609
P16406	Enpep	Glutamyl aminopeptidase OS=Mus musculus OX=10090 GN=Enpep PE=1 SV=1	14845.7	26335	10826.8	20839.2	7555.6	8697.5	16454.1	7118.15	-1.11753	0.0365776	0.117605	7	0.665237	0.102268	162.4	224.768	115.124	112.121	103.449	98.1136	-0.628224
P16546	Sptan1	"Spectrin alpha chain, non-erythrocytic 1 OS=Mus musculus OX=10090 GN=Sptan1 PE=1 SV=4"	1.77984e+06	1.9605e+06	1.54734e+06	1.63017e+06	2.55285e+06	3.40822e+06	3.23902e+06	2.57086e+06	0.76052	0.00195714	0.0302833	137	-0.721125	0.660255	499.565	535.451	442.356	584.009	605.191	550.947	0.239554
P16858	Gapdh	Glyceraldehyde-3-phosphate dehydrogenase OS=Mus musculus OX=10090 GN=Gapdh PE=1 SV=2	5.21897e+06	4.51687e+06	4.25986e+06	3.79137e+06	3.65663e+06	4.79554e+06	3.77308e+06	4.2751e+06	-0.127214	0.550764	0.672165	26	0.532996	0.35812	245.663	302.392	184.586	183.874	196.585	178.206	-0.363323
P17047	Lamp2	Lysosome-associated membrane glycoprotein 2 OS=Mus musculus OX=10090 GN=Lamp2 PE=1 SV=2	1822.02	924.672	1127.01	2188.02	713.667	1032.33	1135.47	893.551	-0.577257	0.0725887	0.177821	2	0.429767	0.502979	233.305	265.716	247.94	216.569	203.877	221.997	-0.216345
P17095	Hmga1	High mobility group protein HMG-I/HMG-Y OS=Mus musculus OX=10090 GN=Hmga1 PE=1 SV=4	4118.01	4073.72	4003.12	5278.21	7059.03	18414.6	5590.99	24031.3	1.47698	0.0138817	0.0707558	3	-0.679553	0.886808	5.11162	6.3541	4.41002	5.20913	6.1611	6.64029	0.191075
P17156	Hspa2	Heat shock-related 70 kDa protein 2 OS=Mus musculus OX=10090 GN=Hspa2 PE=1 SV=2	6516.41	8073.83	9385.63	7347.74	9592.96	16732.7	16273.1	15279.3	1.03369	0.00442817	0.0403896	4	-0.772857	0.913572	13.2556	10.2747	16.8615	17.2108	12.3405	18.0988	0.247723
P17182	Eno1	Alpha-enolase OS=Mus musculus OX=10090 GN=Eno1 PE=1 SV=3	3.95204e+06	2.25237e+06	3.39018e+06	3.4967e+06	3.19916e+06	3.38526e+06	1.86188e+06	3.60136e+06	-0.0651966	0.630257	0.737018	40	0.0520229	0.232554	160.415	216.366	142.44	134.311	129.551	127.003	-0.387225
P17225	Ptbp1	Polypyrimidine tract-binding protein 1 OS=Mus musculus OX=10090 GN=Ptbp1 PE=1 SV=2	55016	50878.5	55055.5	43992.1	51173.2	82854.3	59981.7	67511.4	0.266374	0.116098	0.23368	9	-0.487995	0.862644	140.966	148.803	135.573	135.493	139.71	128.034	-0.0768796
P17427	Ap2a2	AP-2 complex subunit alpha-2 OS=Mus musculus OX=10090 GN=Ap2a2 PE=1 SV=2	13986.7	11955.4	9411.21	5523.72	10844.3	15215.3	16644.8	11875	0.341664	0.153064	0.276889	4	-0.166314	0.886808	158.308	177.969	140.01	169.981	179.159	157.877	0.095174
P17563	Selenbp1	Methanethiol oxidase OS=Mus musculus OX=10090 GN=Selenbp1 PE=1 SV=2	443227	294824	498594	494567	437111	424777	295109	468414	-0.119752	0.736339	0.816427	20	-0.115472	0.969368	96.3365	100.241	92.9204	104.179	99.6676	100.584	0.0729864
P17665	Cox7c	"Cytochrome c oxidase subunit 7C, mitochondrial OS=Mus musculus OX=10090 GN=Cox7c PE=1 SV=1"	5275.58	8696.79	4106.34	3786.13	3036.59	140.242	2281.34	2006.96	-1.12114	0.0437586	0.131006	1	0.838816	0.517183	73.5252	72.5275	57.5399	56.034	62.7396	58.0575	-0.196056
P17710	Hk1	Hexokinase-1 OS=Mus musculus OX=10090 GN=Hk1 PE=1 SV=3	9148.79	6456.88	12952.6	12274.5	12878.3	16832.6	10767.5	10223.3	0.152151	0.24715	0.387141	2	-0.54999	0.0297809	36.6139	32.9894	33.5142	53.7282	45.4867	47.5134	0.506765
P17742	Ppia	Peptidyl-prolyl cis-trans isomerase A OS=Mus musculus OX=10090 GN=Ppia PE=1 SV=2	1.71388e+06	1.7304e+06	1.78978e+06	1.92495e+06	2.99611e+06	4.34284e+06	2.66497e+06	4.34853e+06	1.03542	0.00120907	0.0255527	12	-0.83372	0.927188	440.653	460.233	378.732	415.257	412.864	387.922	-0.06925
P17751	Tpi1	Triosephosphate isomerase OS=Mus musculus OX=10090 GN=Tpi1 PE=1 SV=4	1.27918e+06	814090	1.08496e+06	1.03392e+06	1.30018e+06	1.3768e+06	925460	1.46109e+06	0.337127	0.251325	0.390624	16	-0.506995	0.692619	280.468	315.523	235.556	251.529	223.997	244.525	-0.199154
P17879	Hspa1b	Heat shock 70 kDa protein 1B OS=Mus musculus OX=10090 GN=Hspa1b PE=1 SV=3	56032	35159.2	32638.7	26440.6	30438.9	37819.2	35876.7	49694.8	0.120841	0.802452	0.86347	9	0.152212	0.542159	6.59051	6.06369	6.08035	6.70688	7.17452	13.3325	0.466888
P17897	Lyz1	Lysozyme C-1 OS=Mus musculus OX=10090 GN=Lyz1 PE=1 SV=1	48633.7	153.152	727.282	962.654	688.044	1681.35	100.199	287.907	-0.910715	0.299915	0.441966	1	0.549729	0.990685	64.6114	77.9832	75.6266	83.8014	59.5263	68.9907	-0.0489802
P18242	Ctsd	Cathepsin D OS=Mus musculus OX=10090 GN=Ctsd PE=1 SV=1	52071.9	34452.1	37017.4	57236.1	61135.5	34947.7	26719.4	42872.4	-0.181731	0.599141	0.713126	4	0.0175473	1	540.103	711.422	430.984	555.079	535.018	594.213	0.0305619
P18419	Svs4	Seminal vesicle secretory protein 4 OS=Mus musculus OX=10090 GN=Svs4 PE=1 SV=2	3472.21	19242.1	43973	80794.4	74761.3	68756.3	85185.9	49900.1	1.30145	0.0871875	0.197085	4	-0.773998
P18572	Bsg	Basigin OS=Mus musculus OX=10090 GN=Bsg PE=1 SV=2	27705.8	12379.9	16174.1	16848.4	17797.2	18465.9	11952.5	15553.1	0.011274	0.584433	0.70286	3	0.338499	0.958219	312.598	308.532	296.936	292.303	283.121	294.931	-0.0768727
P18608	Hmgn1	Non-histone chromosomal protein HMG-14 OS=Mus musculus OX=10090 GN=Hmgn1 PE=1 SV=2	26984.5	18012.9	16082.2	22119	5138.22	33552	26595	42714.9	0.581619	0.942884	0.962886	3	-0.286036	0.939602	71.5601	65.8272	69.4684	65.3752	64.6428	66.5979	-0.0724949
P18654	Rps6ka3	Ribosomal protein S6 kinase alpha-3 OS=Mus musculus OX=10090 GN=Rps6ka3 PE=1 SV=2	30505.2	36339.3	29727.6	25271.5	31348.9	48526.5	42077.8	55494.9	0.585486	0.0411755	0.12572	7	-0.601354	0.851923	251.255	303.263	221.62	241.183	229.459	232.425	-0.130892
P18760	Cfl1	Cofilin-1 OS=Mus musculus OX=10090 GN=Cfl1 PE=1 SV=3	721091	723433	641593	577664	744865	1.28593e+06	730321	1.49568e+06	0.524938	0.0502549	0.142075	21	-0.594183	0.947614	320.965	331.164	305.963	341.256	311.695	347.652	0.0617716
P18826	Phka1	"Phosphorylase b kinase regulatory subunit alpha, skeletal muscle isoform OS=Mus musculus OX=10090 GN=Phka1 PE=1 SV=3"	15773.6	19527.2	19146	14192.9	21887	39379	18112	25178.7	0.433863	0.0595773	0.156452	2	-0.498644	0.992257	21.3388	18.1989	20.7252	18.748	20.7197	21.9701	0.0281875
P19001	Krt19	"Keratin, type I cytoskeletal 19 OS=Mus musculus OX=10090 GN=Krt19 PE=1 SV=1"	72889.9	41080.6	75720.2	105363	21330.4	55322.3	99178.9	101391	-0.00425169	0.637633	0.74212	13	-0.144127	0.827434	28.2876	26.4965	34.7796	27.5177	16.5672	82.9004	0.178619
P19096	Fasn	Fatty acid synthase OS=Mus musculus OX=10090 GN=Fasn PE=1 SV=2	2.79072e+07	2.13712e+07	1.967e+07	1.13249e+07	4.4676e+06	6.27169e+06	5.42665e+06	3.63794e+06	-2.05798	0.000124929	0.0156936	116	0.972788	0.00890416	4752.19	8784.87	2155.47	1478.26	2070.1	1023.33	-1.61491
P19157	Gstp1	Glutathione S-transferase P 1 OS=Mus musculus OX=10090 GN=Gstp1 PE=1 SV=2	499909	256683	381087	382951	478137	313362	301146	411880	-0.088613	0.991512	0.99611	9	-0.0269732	1	37.9104	36.5781	32.215	35.0458	37.503	33.6426	-0.00492456
P19221	F2	Prothrombin OS=Mus musculus OX=10090 GN=F2 PE=1 SV=1	9500.63	12435.4	9626.05	9950.74	16838.3	22249.7	11506.7	21257.4	0.950909	0.0119994	0.0658066	5	-0.714151	0.999179	0.452126	2.32976	1.13686	0.499115	0.723244	2.9051	-0.0638156
P19253	Rpl13a	60S ribosomal protein L13a OS=Mus musculus OX=10090 GN=Rpl13a PE=1 SV=4	76644.9	109816	47956.7	65536.1	41628.8	31760.3	67283.7	46667.6	-0.685238	0.0609173	0.159008	5	0.739738	0.886503	10.5815	9.61091	10.1971	9.74179	9.15193	9.22769	-0.111333
P19324	Serpinh1	Serpin H1 OS=Mus musculus OX=10090 GN=Serpinh1 PE=1 SV=3	446681	397556	397615	408879	399166	405262	353378	474455	-0.00359911	0.888157	0.924061	18	0.01184	0.936727	445.718	540.222	355.55	532.672	465.042	508.206	0.18543
P19536	Cox5b	"Cytochrome c oxidase subunit 5B, mitochondrial OS=Mus musculus OX=10090 GN=Cox5b PE=1 SV=1"	40032.6	54620.7	21957.3	16806.1	29938	58781.9	46414.2	32155.2	0.381869	0.316611	0.458769	5	0.0543128	0.863729	69.9799	69.7063	64.3055	59.7783	69.1661	61.462	-0.101263
P19783	Cox4i1	"Cytochrome c oxidase subunit 4 isoform 1, mitochondrial OS=Mus musculus OX=10090 GN=Cox4i1 PE=1 SV=2"	62955.4	117489	39527	51348.2	78288.4	101639	78163.4	74191.8	0.460325	0.240968	0.380326	5	-0.0391254	0.574064	443.57	450.463	372.624	358.421	389.333	362.845	-0.185426
P19973	Lsp1	Lymphocyte-specific protein 1 OS=Mus musculus OX=10090 GN=Lsp1 PE=1 SV=2	1169.86	421.628	3350.7	469.612	14.847	8760.88	3226.32	13040.1	2.84255	0.731463	0.81338	1	-0.591872	0.580026	70.689	77.672	66.4314	99.2912	74.0602	93.7558	0.306176
P20029	Hspa5	Endoplasmic reticulum chaperone BiP OS=Mus musculus OX=10090 GN=Hspa5 PE=1 SV=3	1.63239e+06	1.39912e+06	1.598e+06	1.5565e+06	1.8764e+06	2.49017e+06	1.67926e+06	2.66521e+06	0.454822	0.0389297	0.121778	46	-0.734456	1	460.75	488.154	426.243	480.586	416.201	472.08	-0.00729742
P20108	Prdx3	"Thioredoxin-dependent peroxide reductase, mitochondrial OS=Mus musculus OX=10090 GN=Prdx3 PE=1 SV=1"	42521.6	29568.4	36593.4	36114.6	17075.9	9065.08	12620.5	8481.48	-1.765	0.000125129	0.0156936	5	0.872879	0.886741	114.772	123.33	108.071	101.518	111.606	103.347	-0.128542
P20152	Vim	Vimentin OS=Mus musculus OX=10090 GN=Vim PE=1 SV=3	1.6066e+07	2.41325e+07	1.92868e+07	2.37971e+07	2.77517e+07	5.66083e+07	3.35119e+07	5.29566e+07	0.975541	0.00602132	0.0463775	77	-0.751596	0.765217	1199.16	1423.42	1077.84	1541.34	1398.57	1425.22	0.246601
P20918	Plg	Plasminogen OS=Mus musculus OX=10090 GN=Plg PE=1 SV=3	118985	87533.3	86932	73387.2	88759.7	130813	85244.2	118615	0.234201	0.377939	0.521057	23	-0.17412	0.739868	1.14092	4.57012	3.29647	1.07062	0.920984	3.60545	-0.757825
P21107	Tpm3	Tropomyosin alpha-3 chain OS=Mus musculus OX=10090 GN=Tpm3 PE=1 SV=3	253337	139767	246263	232804	292917	337495	183797	276226	0.248514	0.253286	0.392968	19	-0.525445	0.826119	98.0179	92.5247	90.2715	102.405	95.8858	100.176	0.088279
P21278	Gna11	Guanine nucleotide-binding protein subunit alpha-11 OS=Mus musculus OX=10090 GN=Gna11 PE=1 SV=1	51264.1	44056.6	46413.2	48843.6	54398.1	49670.5	48383.9	48180.8	0.0421054	0.614773	0.725257	7	-0.395548	0.674813	106.061	101.756	91.9756	110.13	109.258	107.101	0.125534
P21279	Gnaq	Guanine nucleotide-binding protein G(q) subunit alpha OS=Mus musculus OX=10090 GN=Gnaq PE=1 SV=4	51001.5	38269.3	41838.7	57155.1	61517.9	54952.4	65144.8	43910.8	0.331907	0.227842	0.366962	4	-0.504514	0.987257	84.6067	90.6785	78.0225	88.61	84.9854	83.9121	0.0260467
P21460	Cst3	Cystatin-C OS=Mus musculus OX=10090 GN=Cst3 PE=1 SV=2	2339.79	3639.82	4065.31	4575.51	10007.5	25681.7	8954.62	17934.5	1.80022	0.00051239	0.0197327	2	-0.740178	0.568956	645.995	672.714	568.778	709.583	747.317	687.768	0.187078
P21614	Gc	Vitamin D-binding protein OS=Mus musculus OX=10090 GN=Gc PE=1 SV=2	27120.1	15321.4	24753.8	27879.1	26689.5	23300.7	10008.3	33234.1	-0.055182	0.765409	0.833723	7	-0.17428	0.942894	1.91075	11.0008	7.63257	2.86398	2.10743	11.1731	-0.416793
P21619	Lmnb2	Lamin-B2 OS=Mus musculus OX=10090 GN=Lmnb2 PE=1 SV=2	45780.8	33791.6	37177.4	43614.3	39439.4	61572	37945.5	63160.5	0.291342	0.220132	0.357709	14	-0.531483	0.81877	10.6828	11.0422	10.0453	12.284	10.8327	11.1731	0.109125
P21981	Tgm2	Protein-glutamine gamma-glutamyltransferase 2 OS=Mus musculus OX=10090 GN=Tgm2 PE=1 SV=4	19533.4	31748.7	25093.2	25594.5	41660.4	21852.2	22461.1	31944.3	0.0799292	0.507381	0.63902	5	-0.329623	0.992257	351.17	345.643	311.919	313.942	368.768	304.249	-0.03472
P22315	Fech	"Ferrochelatase, mitochondrial OS=Mus musculus OX=10090 GN=Fech PE=1 SV=2"	2231.1	2796.82	3846.32	2982.13	1555.72	1234.43	1875.25	1673.12	-0.84001	0.00293523	0.0346918	2	0.642733	0.987257	79.5623	84.6627	75.2048	80.8059	84.0708	79.282	0.029474
P22599	Serpina1b	Alpha-1-antitrypsin 1-2 OS=Mus musculus OX=10090 GN=Serpina1b PE=1 SV=2	837768	685650	622438	940049	940669	558732	587797	742056	-0.198589	0.557964	0.67904	13	0.0790907	0.916514	2.59955	7.68172	6.40091	2.1151	2.00856	8.85806	-0.588029
P23116	Eif3a	Eukaryotic translation initiation factor 3 subunit A OS=Mus musculus OX=10090 GN=Eif3a PE=1 SV=5	14490.7	50205.1	19550.8	26924.9	25816.6	33729	46554.5	45090.1	0.765316	0.178957	0.309514	17	-0.312979	0.948721	205.409	219.893	182.291	209.238	213.739	220.927	0.0876728
P23198	Cbx3	Chromobox protein homolog 3 OS=Mus musculus OX=10090 GN=Cbx3 PE=1 SV=2	6845.53	7117.38	7307.71	9397.24	11465.5	34821.3	10279.7	17337.4	0.967139	0.0160355	0.077845	3	-0.562486	1	11.716	9.94281	10.2983	10.668	10.2889	10.7451	-0.0081818
P23492	Pnp	Purine nucleoside phosphorylase OS=Mus musculus OX=10090 GN=Pnp PE=1 SV=2	173203	147120	175478	195580	179661	136476	218512	183206	0.0574945	0.832535	0.885686	10	-0.289558	0.634819	44.7984	40.6232	44.4303	40.6229	39.3073	37.3778	-0.146007
P23506	Pcmt1	Protein-L-isoaspartate(D-aspartate) O-methyltransferase OS=Mus musculus OX=10090 GN=Pcmt1 PE=1 SV=3	519.875	1021.49	1969.6	3584.94	9829.65	12231.7	5340.01	10204.7	2.81986	0.00113271	0.0251664	1	-0.896612	0.979189	46.1355	48.2777	48.2603	46.2198	42.6936	50.8595	-0.033007
P23953	Ces1c	Carboxylesterase 1C OS=Mus musculus OX=10090 GN=Ces1c PE=1 SV=4	45152.5	19771.4	30276.6	48960.9	35225	14775	24848.9	25665.3	-0.550005	0.197916	0.332712	5	0.300743	0.980202	0.492643	3.55366	2.46974	0.834137	0.772679	4.01398	-0.246983
P24270	Cat	Catalase OS=Mus musculus OX=10090 GN=Cat PE=1 SV=4	828346	593254	1.17637e+06	1.24355e+06	1.3814e+06	1.5974e+06	543607	1.7885e+06	0.589601	0.362478	0.505776	31	-0.621905	0.974877	615.101	683.646	510.215	610.2	671.78	597.851	0.0639602
P24369	Ppib	Peptidyl-prolyl cis-trans isomerase B OS=Mus musculus OX=10090 GN=Ppib PE=1 SV=2	151009	205414	74298.1	98241	77194.6	110565	182455	123446	-0.0601283	0.877051	0.916725	9	0.36169	1	155.451	161.125	153.086	160.817	148.262	164.569	0.0110928
P24452	Capg	Macrophage-capping protein OS=Mus musculus OX=10090 GN=Capg PE=1 SV=2	18957.3	15997.6	23402.2	26982	28400.1	54371.6	44652.6	67963.1	1.2261	0.00390049	0.038923	3	-0.829367	0.429963	40.6048	48.8378	38.2383	52.7035	45.6845	58.4272	0.29719
P24527	Lta4h	Leukotriene A-4 hydrolase OS=Mus musculus OX=10090 GN=Lta4h PE=1 SV=4	63384.5	48232.8	60369.6	53910	58135.9	61332.5	65283.1	65472.1	0.149494	0.351331	0.494146	9	-0.501037	0.166227	71.5196	64.8315	69.7721	80.4906	77.8914	81.5387	0.220029
P24547	Impdh2	Inosine-5'-monophosphate dehydrogenase 2 OS=Mus musculus OX=10090 GN=Impdh2 PE=1 SV=2	5770.46	4054.2	3837.59	3982.11	4833.43	9062.93	4832.97	6398.33	0.468896	0.0899121	0.199001	3	-0.426228	0.992257	34.2233	31.4129	30.9496	32.9569	33.5482	31.2692	0.0184318
P24549	Aldh1a1	Retinal dehydrogenase 1 OS=Mus musculus OX=10090 GN=Aldh1a1 PE=1 SV=5	115735	76521.6	107132	125161	96838	113455	104897	124861	-0.0295604	0.734478	0.815407	10	-0.363069	0.661838	363.467	319.547	327.137	298.807	289.029	286.04	-0.207035
P24668	M6pr	Cation-dependent mannose-6-phosphate receptor OS=Mus musculus OX=10090 GN=M6pr PE=1 SV=1	3591.63	5986.43	9133.43	8100.81	13885.6	7481.51	5165.5	8341.81	0.181964	0.34773	0.49073	4	-0.512322	0.991671	138.697	140.257	128.402	141.11	129.032	142.858	0.0194838
P25444	Rps2	40S ribosomal protein S2 OS=Mus musculus OX=10090 GN=Rps2 PE=1 SV=3	92839.8	131418	58584.7	92741.8	69881.5	48338	86586.3	81310.8	-0.299802	0.231428	0.369906	8	0.56026	0.970772	219.509	228.294	205.018	200.468	218.831	203.769	-0.0669345
P25911	Lyn	Tyrosine-protein kinase Lyn OS=Mus musculus OX=10090 GN=Lyn PE=1 SV=4	2405.31	1926.49	1947.63	840.353	2938.41	1037.22	2334.02	798.601	-0.316078	0.836108	0.88879	2	0.233976	0.169642	43.0966	39.1919	39.2338	48.1314	45.3879	48.3888	0.224577
P25962	Adrb3	Beta-3 adrenergic receptor OS=Mus musculus OX=10090 GN=Adrb3 PE=2 SV=2	12459.2	15844.5	9950.66	12565.8	13778.8	20712.1	19922.5	17236	0.566555	0.0416836	0.126733	2	-0.547262	0.840758	761.935	851.631	839.742	703.041	767.214	592.773	-0.256374
P25976	Ubtf	Nucleolar transcription factor 1 OS=Mus musculus OX=10090 GN=Ubtf PE=1 SV=1	8352.72	3540.71	5386.46	3899.56	3689.5	6172.33	5292.15	8734.9	0.318509	0.594749	0.71053	2	-0.108129	1	105.858	103.104	108.071	108.435	105.6	104.203	0.00553897
P26039	Tln1	Talin-1 OS=Mus musculus OX=10090 GN=Tln1 PE=1 SV=2	597867	674532	674486	548721	743917	1.37383e+06	1.11201e+06	1.04561e+06	0.763875	0.00690665	0.0498718	85	-0.681459	0.381998	247.912	279.034	228.841	306.906	309.915	306.973	0.29439
P26040	Ezr	Ezrin OS=Mus musculus OX=10090 GN=Ezr PE=1 SV=3	31452.5	8702.46	26282.9	20738.2	5299.94	9236.67	15630	46791.7	-0.958329	0.462525	0.598623	7	-0.0380413	1	48.5462	45.1869	59.0921	46.7519	32.1145	71.5392	-0.0904143
P26041	Msn	Moesin OS=Mus musculus OX=10090 GN=Msn PE=1 SV=3	1.59811e+06	1.05825e+06	1.23789e+06	1.05229e+06	1.60937e+06	3.23609e+06	1.6029e+06	2.80689e+06	0.892951	0.0157815	0.0774767	60	-0.627587	0.833975	286.059	296.542	249.796	318.435	307.443	301.448	0.15931
P26043	Rdx	Radixin OS=Mus musculus OX=10090 GN=Rdx PE=1 SV=3	117037	72770.6	94297.7	82336.3	118656	236983	101432	225874	0.8937	0.0311319	0.110051	19	-0.621575	0.991031	122.754	128.225	116.035	127.354	122.012	123.384	0.0233425
P26231	Ctnna1	Catenin alpha-1 OS=Mus musculus OX=10090 GN=Ctnna1 PE=1 SV=1	49939.1	35495.1	37200.3	39072.9	38815.5	69669.7	50172.4	64184.9	0.573822	0.0863493	0.195612	9	-0.540069	0.738348	279.515	286.315	270.194	314.257	289.276	313.548	0.13285
P26262	Klkb1	Plasma kallikrein OS=Mus musculus OX=10090 GN=Klkb1 PE=1 SV=2	408.344	1372.01	1729.33	1923.86	2593.37	2521.81	1456.02	5163.07	0.731391	0.0612997	0.159321	3	-0.749725	0.96566	0.330574	0.773963	0.866906	0.420286	0.500786	0.842962	-0.10736
P26350	Ptma	Prothymosin alpha OS=Mus musculus OX=10090 GN=Ptma PE=1 SV=2	24832	5799	13802.7	13350.6	16624.8	23502.9	5415.66	22354.3	0.506016	0.720585	0.805032	2	-0.16706	0.975842	99.436	86.1978	99.433	98.0694	86.2212	93.5224	-0.0359953
P26443	Glud1	"Glutamate dehydrogenase 1, mitochondrial OS=Mus musculus OX=10090 GN=Glud1 PE=1 SV=1"	471604	456392	510030	395944	505727	540815	507415	422858	0.126838	0.518838	0.649673	21	-0.158449	0.899625	255.793	247.109	229.718	222.816	232.228	226.083	-0.103915
P26516	Psmd7	26S proteasome non-ATPase regulatory subunit 7 OS=Mus musculus OX=10090 GN=Psmd7 PE=1 SV=2	4464.82	6204.48	6821.02	7022.92	8729.69	14428.6	8548.44	13648.2	0.746637	0.00745883	0.051722	2	-0.811279	0.974877	81.2032	81.1985	75.1036	75.4061	81.7227	75.469	-0.0301901
P26638	Sars	"Serine--tRNA ligase, cytoplasmic OS=Mus musculus OX=10090 GN=Sars PE=1 SV=3"	11079.9	10432.5	9988.86	10600.4	16005.5	22542.1	15913.6	20633.5	0.789174	0.00120853	0.0255527	4	-0.817575	0.91616	81.1019	83.6878	72.9271	77.9484	82.5383	87.0636	0.0594816
P26645	Marcks	Myristoylated alanine-rich C-kinase substrate OS=Mus musculus OX=10090 GN=Marcks PE=1 SV=2	29720.6	35292.6	41361.6	27341.5	15243.4	15180.8	21766.8	27519.3	-0.830255	0.0126173	0.0679062	5	0.687756	0.945381	128.426	118.455	122.548	127.374	110.123	117.295	-0.0600946
P26883	Fkbp1a	Peptidyl-prolyl cis-trans isomerase FKBP1A OS=Mus musculus OX=10090 GN=Fkbp1a PE=1 SV=2	100237	153733	127539	121094	214033	288713	168863	324972	1.0002	0.0040346	0.039727	3	-0.783011	0.995136	262.843	251.901	234.223	251.766	256.871	249.408	0.0188991
P27048	Snrpb	Small nuclear ribonucleoprotein-associated protein B OS=Mus musculus OX=10090 GN=Snrpb PE=1 SV=1	736.828	674.44	719.291	1839.08	1034.22	88.3121	1379.04	1022.11	0.498027	0.500428	0.633023	1	-0.137672	1	78.4278	73.2535	65.5541	72.0362	71.7368	73.6792	0.00524794
P27546	Map4	Microtubule-associated protein 4 OS=Mus musculus OX=10090 GN=Map4 PE=1 SV=3	210899	278010	214644	295272	308031	905316	464409	762345	1.28438	0.00746263	0.051722	38	-0.694596	0.0754612	185.616	182.118	171.257	225.969	210.081	234.545	0.314525
P27612	Plaa	Phospholipase A-2-activating protein OS=Mus musculus OX=10090 GN=Plaa PE=1 SV=4	8087.05	5145.95	6530.88	4841.53	5066.76	1647.97	4095.98	3720.79	-0.570449	0.0427122	0.128955	2	0.724306	0.941217	48.2221	49.3357	45.0377	45.2541	44.8441	47.9608	-0.0462121
P27659	Rpl3	60S ribosomal protein L3 OS=Mus musculus OX=10090 GN=Rpl3 PE=1 SV=3	110609	129795	75847	88415.5	100778	78618.1	121729	128439	0.163505	0.710606	0.797591	13	0.0298566	0.87103	263.896	261.941	255.229	245.794	229.707	246.51	-0.114038
P27661	H2afx	Histone H2AX OS=Mus musculus OX=10090 GN=H2afx PE=1 SV=2	23226.8	52941.7	34031.6	52831.3	49918.1	30954.6	29387.1	86827	-0.109276	0.622912	0.730877	4	-0.396917	0.634819	10.5004	9.85984	10.4164	8.9535	8.65758	9.44168	-0.186424
P27773	Pdia3	Protein disulfide-isomerase A3 OS=Mus musculus OX=10090 GN=Pdia3 PE=1 SV=2	1.20651e+06	1.25959e+06	1.20841e+06	1.14007e+06	1.14594e+06	2.02309e+06	1.41675e+06	2.12297e+06	0.487595	0.0854506	0.194594	34	-0.596583	1	292.116	300.11	286.476	307.163	264.361	304.853	-0.0069419
P28063	Psmb8	Proteasome subunit beta type-8 OS=Mus musculus OX=10090 GN=Psmb8 PE=1 SV=2	2224.05	1733.57	3657.41	2967.85	3691.74	5420	1932.01	4014.83	0.583518	0.215626	0.352318	1	-0.585597	0.655975	46.3988	42.1583	47.0624	46.949	54.9783	49.8479	0.161003
P28271	Aco1	Cytoplasmic aconitate hydratase OS=Mus musculus OX=10090 GN=Aco1 PE=1 SV=3	279528	179459	257004	207671	201973	190219	209565	166542	-0.23713	0.223963	0.362059	24	0.570424	1	267.664	286.689	211.007	242.07	263.051	256.334	0.00386209
P28352	Apex1	DNA-(apurinic or apyrimidinic site) lyase OS=Mus musculus OX=10090 GN=Apex1 PE=1 SV=2	5535.91	5844.08	6135.77	6279.14	5912.66	6622.2	8098.56	10123.7	0.290378	0.120614	0.238885	2	-0.677282	0.296461	38.5384	44.6061	32.7043	31.4788	32.683	31.561	-0.263984
P28474	Adh5	Alcohol dehydrogenase class-3 OS=Mus musculus OX=10090 GN=Adh5 PE=1 SV=3	93206.8	50123.7	72414.6	84255.6	90968.9	64862.9	45343.9	79395.3	-0.122303	0.713174	0.798921	10	0.0077667	0.844343	123.949	123.288	113.099	109.066	113.905	113.891	-0.0962289
P28653	Bgn	Biglycan OS=Mus musculus OX=10090 GN=Bgn PE=1 SV=1	2732.43	4747.09	3254.81	6022.68	2798.56	3018.92	5700.38	2508.99	-0.435451	0.447789	0.587387	2	0.139883	0.0929189	310.531	329.629	326.462	469.727	385.526	423.328	0.39931
P28654	Dcn	Decorin OS=Mus musculus OX=10090 GN=Dcn PE=1 SV=1	251213	226931	243181	278569	281190	369789	293346	357051	0.388895	0.0512385	0.143451	13	-0.81085	0.959664	1199.42	1140.51	1201.86	1190.54	992.045	1137.04	-0.0973065
P28656	Nap1l1	Nucleosome assembly protein 1-like 1 OS=Mus musculus OX=10090 GN=Nap1l1 PE=1 SV=2	27191.7	34075.5	25081.2	43681.9	35437.9	38539.8	45072.1	33632.9	0.27987	0.264057	0.404966	4	-0.49408	0.158119	191.917	197.51	177.55	242.425	239.396	214.974	0.296821
P28665	Mug1	Murinoglobulin-1 OS=Mus musculus OX=10090 GN=Mug1 PE=1 SV=3	316323	250187	313770	414043	583914	524277	428856	597620	0.812489	0.00622174	0.0468277	26	-0.931011	0.595975	1.28273	6.22964	5.6248	0.932673	1.06929	4.50034	-1.10801
P29341	Pabpc1	Polyadenylate-binding protein 1 OS=Mus musculus OX=10090 GN=Pabpc1 PE=1 SV=2	115126	126284	130516	117509	119194	140121	114674	154719	0.0852631	0.542581	0.666507	22	-0.435471	0.890879	317.5	339.835	258.62	325.333	327.193	330.785	0.111841
P29391	Ftl1	Ferritin light chain 1 OS=Mus musculus OX=10090 GN=Ftl1 PE=1 SV=2	120240	49452.9	89697.2	93771	87446.9	153903	51755.8	130368	0.219361	0.598355	0.713126	9	-0.292742	0.607174	922.485	930.956	788.636	698.37	760.986	696.036	-0.290859
P29699	Ahsg	Alpha-2-HS-glycoprotein OS=Mus musculus OX=10090 GN=Ahsg PE=1 SV=1	105300	131611	166759	150495	187597	302324	121816	378715	0.758869	0.0711193	0.175414	7	-0.682246	0.974877	3.24782	9.83909	8.13873	3.23841	2.6265	12.71	-0.422162
P29758	Oat	"Ornithine aminotransferase, mitochondrial OS=Mus musculus OX=10090 GN=Oat PE=1 SV=1"	37685.4	24190.8	47962.7	48090.1	30732.4	27876.4	23793.9	24579.9	-0.699696	0.0667513	0.168876	7	0.378651	0.991714	180.795	176.766	174.041	175.46	158.174	182.058	-0.0461906
P29788	Vtn	Vitronectin OS=Mus musculus OX=10090 GN=Vtn PE=1 SV=2	18961.5	26637.8	10393.2	23187	15379.2	25944.5	17815.8	25341.1	0.0191225	0.673117	0.76896	4	-0.0656284	0.913651	26.5048	28.2805	26.023	24.8769	27.8878	22.1647	-0.114382
P30115	Gsta3	Glutathione S-transferase A3 OS=Mus musculus OX=10090 GN=Gsta3 PE=1 SV=2	444108	430411	469923	410608	305906	305228	238616	294628	-0.543923	0.00334813	0.0361673	13	0.868644	0.00904413	254.881	260.842	209.421	150.628	161.239	120.7	-0.749262
P30416	Fkbp4	Peptidyl-prolyl cis-trans isomerase FKBP4 OS=Mus musculus OX=10090 GN=Fkbp4 PE=1 SV=5	13046.7	8317.69	11531.8	9274.71	9386.89	12021.4	7272.04	15413.1	0.0386631	0.909933	0.93798	4	-0.137482	0.948721	93.0951	91.4253	79.8446	77.0024	71.712	102.569	-0.0876191
P30681	Hmgb2	High mobility group protein B2 OS=Mus musculus OX=10090 GN=Hmgb2 PE=1 SV=3	37878.2	18992.3	22885.1	17378.6	51924.8	97525.9	63600.7	94956.4	1.89824	0.000491584	0.0197327	4	-0.767472	0.522088	7.88706	7.18386	7.37949	6.68717	5.22184	5.9983	-0.33242
P30933	Svs5	Seminal vesicle secretory protein 5 OS=Mus musculus OX=10090 GN=Svs5 PE=2 SV=1	646.442	5830.21	17635.6	16679.5	21022.8	20864.1	18966.8	15901.1	1.0124	0.102565	0.217915	2	-0.826918
P30999	Ctnnd1	Catenin delta-1 OS=Mus musculus OX=10090 GN=Ctnnd1 PE=1 SV=2	86.6612	2912.05	3164.42	1719.92	3308.43	8920.35	4526.64	7298.96	1.36088	0.0557174	0.150637	2	-0.72713	1	28.713	24.6296	30.241	26.3944	28.6294	28.4095	0.00183148
P31001	Des	Desmin OS=Mus musculus OX=10090 GN=Des PE=1 SV=3	17982.8	16815.2	12036.3	19630.4	16106.8	42025.8	28925.4	42900.7	1.00361	0.0264993	0.102279	7	-0.670226	0.202596	50.7949	39.8557	58.1304	55.1471	58.8095	196.279	0.811802
P31230	Aimp1	Aminoacyl tRNA synthase complex-interacting multifunctional protein 1 OS=Mus musculus OX=10090 GN=Aimp1 PE=1 SV=2	693.437	3512.52	3412.43	2836.78	3415.17	8570.29	3949.44	6080.46	0.655387	0.0537102	0.147278	1	-0.657611	0.86324	31.8531	32.1182	28.4526	27.8527	29.1484	30.3938	-0.0794572
P31324	Prkar2b	cAMP-dependent protein kinase type II-beta regulatory subunit OS=Mus musculus OX=10090 GN=Prkar2b PE=1 SV=3	187617	214395	215369	169195	241246	288326	278087	369498	0.49759	0.0135462	0.0700763	17	-0.754866	0.839816	399.082	473.717	335.32	465.195	488.376	464.221	0.244796
P31786	Dbi	Acyl-CoA-binding protein OS=Mus musculus OX=10090 GN=Dbi PE=1 SV=2	341541	267475	350515	396501	725780	1.15503e+06	502500	1.04375e+06	1.33085	0.00160507	0.0286013	8	-0.801434	0.942874	1423.4	1531.43	1230.24	1364.91	1366.94	1241.98	-0.0702606
P32020	Scp2	Non-specific lipid-transfer protein OS=Mus musculus OX=10090 GN=Scp2 PE=1 SV=3	704018	570144	566378	607481	577835	438508	390036	471288	-0.372477	0.0555272	0.150637	13	0.721058	0.565109	307.108	329.38	248.632	241.735	263.372	231.861	-0.256241
P32067	Ssb	Lupus La protein homolog OS=Mus musculus OX=10090 GN=Ssb PE=1 SV=1	7053.19	13592.9	4674.94	9795.22	3024.61	2434.8	7886.93	3074.49	-1.44663	0.0284522	0.105853	2	0.671165	0.522088	87.0377	92.9188	90.9126	85.1218	80.4373	77.784	-0.155075
P32261	Serpinc1	Antithrombin-III OS=Mus musculus OX=10090 GN=Serpinc1 PE=1 SV=1	50297.2	37047.8	39154.4	42194.9	56519.8	86605.9	49998.9	118145	0.78349	0.0203709	0.0892923	9	-0.681515	0.991317	0.654713	3.32548	2.68908	0.912966	1.53892	3.66381	-0.061903
P32883	Kras	GTPase KRas OS=Mus musculus OX=10090 GN=Kras PE=1 SV=1	9802.77	13417.8	9299.47	12434.6	12546.3	17237.9	16952	12337.3	0.401547	0.0875807	0.197192	2	-0.520954	0.800039	34.8311	34.6489	37.6141	40.7018	34.3391	40.257	0.103242
P32921	Wars	"Tryptophan--tRNA ligase, cytoplasmic OS=Mus musculus OX=10090 GN=Wars PE=1 SV=2"	23828.6	25268.7	27142.2	19392.7	30472.1	58036	38214.4	55775.3	0.911849	0.00583452	0.0454464	4	-0.714458	0.250447	54.482	57.4881	48.8171	59.6995	59.6499	145.737	0.587702
P33622	Apoc3	Apolipoprotein C-III OS=Mus musculus OX=10090 GN=Apoc3 PE=1 SV=2	3058.11	6040.54	5144.93	6182.35	15208	15398.9	7451.83	11631.7	1.25446	0.00309514	0.0355223	1	-0.800851	0.712109	1.84997	4.01003	4.47751	1.46477	1.61308	4.07235	-0.595823
P34022	Ranbp1	Ran-specific GTPase-activating protein OS=Mus musculus OX=10090 GN=Ranbp1 PE=1 SV=2	25307.6	21477.2	19060.1	23625.2	29327.3	59861.4	22199.6	50601	0.774139	0.0434469	0.130718	6	-0.600174	0.863113	23.4255	24.5259	21.0795	21.2705	22.5241	19.9858	-0.112974
P34884	Mif	Macrophage migration inhibitory factor OS=Mus musculus OX=10090 GN=Mif PE=1 SV=2	44722.6	34144.6	32519.8	36258.5	39805	50849.5	36576.1	47016.4	0.298068	0.225651	0.363771	3	-0.417754	0.842723	19.0293	16.9335	20.0672	18.0976	17.2098	15.9977	-0.125349
P34914	Ephx2	Bifunctional epoxide hydrolase 2 OS=Mus musculus OX=10090 GN=Ephx2 PE=1 SV=2	222233	156261	192054	167658	220856	138354	154879	91954.2	-0.293761	0.24353	0.382975	11	0.479741	0.626789	249.35	235.928	208.004	243.508	347.585	243.144	0.250005
P35235	Ptpn11	Tyrosine-protein phosphatase non-receptor type 11 OS=Mus musculus OX=10090 GN=Ptpn11 PE=1 SV=2	30270.1	41973.8	39100.7	30635.5	39333.3	56576.5	48659.6	57572.7	0.600263	0.0314555	0.110586	7	-0.681471	0.958128	240.923	257.17	205.288	238.089	251.508	240.868	0.0604683
P35276	Rab3d	Ras-related protein Rab-3D OS=Mus musculus OX=10090 GN=Rab3d PE=1 SV=1	11099.6	10238.8	8327.71	12321.6	13124.1	9169.23	11077.1	13557.3	0.177628	0.448082	0.587387	3	-0.445083	0.857648	125.023	130.901	101.863	138.804	125.497	126.108	0.132692
P35278	Rab5c	Ras-related protein Rab-5C OS=Mus musculus OX=10090 GN=Rab5c PE=1 SV=2	67883.5	63361.7	59192.7	63691.4	66447.4	75742.4	60857.7	73585.7	0.138465	0.450321	0.589431	4	-0.429508	0.98978	138.09	139.074	122.21	135.789	132.418	137.644	0.0255301
P35279	Rab6a	Ras-related protein Rab-6A OS=Mus musculus OX=10090 GN=Rab6a PE=1 SV=4	9982.89	14893	12667.4	16229.6	17032.5	19928.7	18402.2	22243.1	0.479487	0.0229733	0.0957982	3	-0.876095	0.945381	80.0485	82.2772	77.82	86.048	81.4013	81.8888	0.054118
P35293	Rab18	Ras-related protein Rab-18 OS=Mus musculus OX=10090 GN=Rab18 PE=1 SV=2	39760.7	48742.5	41793.6	43364.7	44710	48787.8	48003	36836.4	0.121959	0.840659	0.892139	8	0.0233542	0.677248	84.3028	85.0569	80.587	78.6775	73.9366	75.7413	-0.130411
P35441	Thbs1	Thrombospondin-1 OS=Mus musculus OX=10090 GN=Thbs1 PE=1 SV=1	2649.47	2451.82	3904.95	4312.24	5010.83	8245.28	6637.17	10923.5	1.20156	0.00305492	0.0354548	2	-0.860798	0.00203586	111.267	96.4453	92.7348	245.124	208.697	326.408	1.3562
P35486	Pdha1	"Pyruvate dehydrogenase E1 component subunit alpha, somatic form, mitochondrial OS=Mus musculus OX=10090 GN=Pdha1 PE=1 SV=1"	623314	386361	438575	352244	246115	280024	181531	218830	-0.826815	0.00296812	0.0347551	18	0.874396	0.0950628	389.358	474.671	297.038	283.317	286.557	263.785	-0.45269
P35505	Fah	Fumarylacetoacetase OS=Mus musculus OX=10090 GN=Fah PE=1 SV=2	183087	103447	151449	155584	244815	213323	145183	223435	0.508183	0.0788449	0.186903	9	-0.668715	0.653162	118.743	120.446	105.355	130.567	150.858	111.323	0.180413
P35550	Fbl	rRNA 2'-O-methyltransferase fibrillarin OS=Mus musculus OX=10090 GN=Fbl PE=1 SV=2	686.907	5098.12	793.995	4675.21	1438.88	514.797	3735.64	1955.35	-0.199931	0.714508	0.799898	2	0.180208	0.811395	11.0677	11.2497	10.6358	9.74179	10.5855	10.1031	-0.115336
P35564	Canx	Calnexin OS=Mus musculus OX=10090 GN=Canx PE=1 SV=1	123624	106127	121230	147343	129640	70937.1	81344.1	99481	-0.444552	0.0969023	0.209919	12	0.381335	0.991747	231.786	238.376	216.12	223.328	197.426	253.649	-0.0315173
P35700	Prdx1	Peroxiredoxin-1 OS=Mus musculus OX=10090 GN=Prdx1 PE=1 SV=1	696381	822046	717574	867547	731303	766788	779353	716030	-0.036524	0.761545	0.832518	16	0.105286	0.154825	419.685	440.671	378.799	338.3	344.198	325.182	-0.295884
P35762	Cd81	CD81 antigen OS=Mus musculus OX=10090 GN=Cd81 PE=1 SV=2	5326.79	6042.89	4477.59	5596.51	991.305	1311.71	7656.96	840.381	-2.25947	0.0297439	0.107479	2	0.577183	0.847219	323.963	274.844	303.111	335.64	320.099	317.537	0.112688
P35922	Fmr1	Synaptic functional regulator FMR1 OS=Mus musculus OX=10090 GN=Fmr1 PE=1 SV=1	10881.4	18083.3	9104.96	11822.2	9540.3	19406.1	20359.3	29282.2	0.809419	0.132566	0.252963	2	-0.493325	0.992257	160.455	238.085	156.038	212.608	145.939	209.644	0.0419825
P35979	Rpl12	60S ribosomal protein L12 OS=Mus musculus OX=10090 GN=Rpl12 PE=1 SV=2	238292	177586	162324	126287	131311	183847	123259	149723	-0.276054	0.329434	0.470254	6	0.636338	0.835205	243.921	224.353	233.076	215.918	214.357	220.383	-0.10749
P35980	Rpl18	60S ribosomal protein L18 OS=Mus musculus OX=10090 GN=Rpl18 PE=1 SV=3	165760	197026	111388	139158	113766	121412	162200	151470	-0.163441	0.535541	0.661782	5	0.483983	0.984754	149.212	145.526	137.192	142.549	139.784	140.582	-0.0295898
P37040	Por	NADPH--cytochrome P450 reductase OS=Mus musculus OX=10090 GN=Por PE=1 SV=2	477021	485588	503339	489207	552185	456431	475568	442951	-0.0650668	0.86391	0.908069	25	0.0845769	0.527362	252.409	251.362	197.864	257.461	290.067	264.368	0.21775
P37804	Tagln	Transgelin OS=Mus musculus OX=10090 GN=Tagln PE=1 SV=3	74305.4	80531.3	65651.2	54404.2	94964	127963	85450.5	121267	0.619605	0.0129425	0.0688277	10	-0.651005	0.118805	202.168	178.923	205.861	240.651	262.037	494.355	0.688564
P38060	Hmgcl	"Hydroxymethylglutaryl-CoA lyase, mitochondrial OS=Mus musculus OX=10090 GN=Hmgcl PE=1 SV=2"	14343	12749.6	12762.3	10153.5	8784.59	10960.9	9127.48	8614.06	-0.510504	0.0421387	0.127892	2	0.916145	0.97851	48.2018	45.1869	43.6374	42.4951	48.4776	42.825	-0.03583
P38647	Hspa9	"Stress-70 protein, mitochondrial OS=Mus musculus OX=10090 GN=Hspa9 PE=1 SV=3"	907537	1.08485e+06	916299	820108	1.18835e+06	1.61719e+06	927883	1.23088e+06	0.407366	0.0876143	0.197192	36	-0.496794	0.525357	398.049	448.118	345.072	331.008	369.435	302.829	-0.244344
P39054	Dnm2	Dynamin-2 OS=Mus musculus OX=10090 GN=Dnm2 PE=1 SV=2	12973.2	23652.6	22296.7	17341.3	13776.8	14725.4	26462.2	15844	-0.364394	0.676326	0.769966	7	0.153844	0.418584	106.81	104.66	95.5862	115.274	120.653	110.175	0.173364
P39447	Tjp1	Tight junction protein ZO-1 OS=Mus musculus OX=10090 GN=Tjp1 PE=1 SV=2	35040.9	20580.5	28747.2	17309.1	252250	405416	167300	63050.4	3.07823	0.0004821	0.0197327	3	-0.597878	0.593043	129.662	124.18	134.341	147.948	158.273	141.457	0.204928
P40124	Cap1	Adenylyl cyclase-associated protein 1 OS=Mus musculus OX=10090 GN=Cap1 PE=1 SV=4	171690	161459	179997	168278	140443	173764	208014	194095	0.111617	0.743848	0.820553	14	-0.247377	0.811395	140.662	147.227	136.754	155.023	140.526	164.744	0.113895
P40142	Tkt	Transketolase OS=Mus musculus OX=10090 GN=Tkt PE=1 SV=1	8.70886e+06	4.31264e+06	6.7125e+06	5.88312e+06	3.67138e+06	5.24102e+06	2.22202e+06	4.62355e+06	-0.609054	0.0491917	0.140675	39	0.620561	0.0153343	1005.32	1427.9	536.906	429.584	542.804	358.468	-1.06829
P40336	Vps26a	Vacuolar protein sorting-associated protein 26A OS=Mus musculus OX=10090 GN=Vps26a PE=1 SV=1	24935.1	21585.9	28947.6	23136.8	15136.6	3962.75	17783.8	9916.71	-0.971198	0.0174505	0.0802166	4	0.744581	0.580901	96.4783	96.715	85.3955	82.2839	89.039	78.9123	-0.154268
P40630	Tfam	"Transcription factor A, mitochondrial OS=Mus musculus OX=10090 GN=Tfam PE=1 SV=2"	20492.7	11402.6	21819.7	14866.1	11403.3	17074.5	8339.47	12842.1	-0.528404	0.141551	0.264911	6	0.465214	0.718979	29.7867	32.2841	29.5661	29.0154	28.9507	26.464	-0.118329
P41105	Rpl28	60S ribosomal protein L28 OS=Mus musculus OX=10090 GN=Rpl28 PE=1 SV=2	77122.7	69679	54754.4	48980.9	41229.2	30226.4	49531.7	44273.7	-0.531792	0.0261647	0.101667	7	0.883218	0.991671	121.903	117.355	119.511	121.245	120.826	122.451	0.0231003
P41216	Acsl1	Long-chain-fatty-acid--CoA ligase 1 OS=Mus musculus OX=10090 GN=Acsl1 PE=1 SV=2	3.18732e+06	2.02356e+06	2.62923e+06	2.27557e+06	2.13888e+06	1.89905e+06	1.566e+06	1.83461e+06	-0.390058	0.0547863	0.14905	45	0.700005	0.485839	552.967	679.684	427.272	696.261	661.646	900.81	0.456566
P42125	Eci1	"Enoyl-CoA delta isomerase 1, mitochondrial OS=Mus musculus OX=10090 GN=Eci1 PE=1 SV=2"	404712	398289	409815	355141	538163	580773	343894	432998	0.265846	0.246924	0.387141	8	-0.408752	0.927188	103.569	103.146	83.5058	99.843	119.392	88.3865	0.0800397
P42208	Sep.02	Septin-2 OS=Mus musculus OX=10090 GN=Sept2 PE=1 SV=2	42458.9	59794.8	37001.3	55852.3	86266.7	98350.7	93146.6	129354	0.974877	0.000963454	0.0235164	8	-0.858715	0.993512	2.0323	2.14307	3.31334	1.93774	2.89839	2.36038	-0.0408112
P42225	Stat1	Signal transducer and activator of transcription 1 OS=Mus musculus OX=10090 GN=Stat1 PE=1 SV=1	14117.5	13844.1	12625	10422.3	11904.2	24073.7	14547.8	16662.5	0.235926	0.168233	0.297802	6	-0.344568	0.716615	49.5187	47.7384	45.8138	39.5588	43.2621	42.6304	-0.189973
P42227	Stat3	Signal transducer and activator of transcription 3 OS=Mus musculus OX=10090 GN=Stat3 PE=1 SV=2	4508.01	3962.89	6696.58	3040.3	5055.04	7435.54	6070	4755.94	0.390189	0.17674	0.306905	3	-0.349437	0.97555	110.497	116.339	115.698	117.619	116.624	121.225	0.0536563
P42232	Stat5b	Signal transducer and activator of transcription 5B OS=Mus musculus OX=10090 GN=Stat5b PE=1 SV=1	9019.47	7085.55	8956.91	7129.75	5994.31	11640	8188.58	9161.82	0.116197	0.703486	0.792679	4	-0.142506	0.752451	67.326	58.712	58.0966	65.6117	68.0291	69.3798	0.143782
P42567	Eps15	Epidermal growth factor receptor substrate 15 OS=Mus musculus OX=10090 GN=Eps15 PE=1 SV=1	1239.59	919.378	1124.04	1518.95	372.679	223.358	322.428	37.6621	-2.13704	0.00291027	0.0346918	1	0.790755	0.921316	100.611	106.9	98.3701	108.948	107.627	103.133	0.0642762
P42669	Pura	Transcriptional activator protein Pur-alpha OS=Mus musculus OX=10090 GN=Pura PE=1 SV=1	31110.9	26884.6	34346.5	33259.2	42664.1	32886.3	33131.1	34781.4	0.0776638	0.283339	0.425131	5	-0.651181	0.967805	14.3091	14.2783	13.4365	14.2547	15.1583	13.8967	0.0431244
P42932	Cct8	T-complex protein 1 subunit theta OS=Mus musculus OX=10090 GN=Cct8 PE=1 SV=3	122013	133079	118706	106171	121178	165836	145098	150656	0.29693	0.130643	0.250959	11	-0.499544	0.814955	115.785	129.055	113.403	111.352	110.519	113.191	-0.0942397
P43274	Hist1h1e	Histone H1.4 OS=Mus musculus OX=10090 GN=Hist1h1e PE=1 SV=2	1.79858e+06	1.67981e+06	1.35394e+06	1.21967e+06	1.46751e+06	3.23216e+06	2.17697e+06	3.28443e+06	0.81468	0.0409926	0.12572	17	-0.563134	0.901467	3.43015	5.35839	2.03107	3.96758	5.19712	4.46143	0.433721
P43275	Hist1h1a	Histone H1.1 OS=Mus musculus OX=10090 GN=Hist1h1a PE=1 SV=2	63301.8	82365.6	77202.7	64323.9	73779.2	212350	121976	224236	1.19145	0.0190423	0.0854798	5	-0.662975
P43276	Hist1h1b	Histone H1.5 OS=Mus musculus OX=10090 GN=Hist1h1b PE=1 SV=2	360673	339965	311014	280425	334895	972972	423381	1.11735e+06	0.980994	0.0369276	0.118073	11	-0.605367
P43277	Hist1h1d	Histone H1.3 OS=Mus musculus OX=10090 GN=Hist1h1d PE=1 SV=2	259959	253921	221123	208195	255378	975060	362544	1.02534e+06	1.32721	0.0234551	0.0963214	4	-0.618838	0.964493	1.2017	1.97712	0.715058	1.20857	1.14344	0.940233	-0.128941
P45376	Akr1b1	Aldose reductase OS=Mus musculus OX=10090 GN=Akr1b1 PE=1 SV=3	434050	305573	353006	309199	346995	297576	281844	340144	-0.0544119	0.458326	0.595175	15	0.448286
P45591	Cfl2	Cofilin-2 OS=Mus musculus OX=10090 GN=Cfl2 PE=1 SV=1	13229.7	13892.8	11949.8	11290	13680	11515.7	11651.8	10120.9	-0.118302	0.539323	0.664283	5	0.586164	0.349391	83.2494	91.2386	80.0808	72.3515	77.1252	72.2201	-0.197971
P45878	Fkbp2	Peptidyl-prolyl cis-trans isomerase FKBP2 OS=Mus musculus OX=10090 GN=Fkbp2 PE=1 SV=1	23190.2	26804.8	20016.9	33098.5	33985.8	53857.3	29007.3	49101.7	0.71235	0.030232	0.108248	3	-0.718712	0.314264	44.9199	42.5731	41.8996	38.9873	38.3434	37.0665	-0.177379
P45952	Acadm	"Medium-chain specific acyl-CoA dehydrogenase, mitochondrial OS=Mus musculus OX=10090 GN=Acadm PE=1 SV=1"	768884	450918	699192	586960	718313	717589	351157	654701	0.0975204	0.822065	0.878322	19	0.014261	1	304.008	332.533	275.188	291.318	328.503	284.795	-0.00986697
P46412	Gpx3	Glutathione peroxidase 3 OS=Mus musculus OX=10090 GN=Gpx3 PE=1 SV=2	13628.9	11109.7	10027.7	11804.6	9040.53	4028.73	9070.16	6075.3	-0.627827	0.020819	0.0896788	3	0.781342	0.441619	1100.96	810.184	1148.28	828.93	793.44	664.014	-0.409921
P46414	Cdkn1b	Cyclin-dependent kinase inhibitor 1B OS=Mus musculus OX=10090 GN=Cdkn1b PE=1 SV=2	198.938	341.415	146.189	557.362	111.246	160.499	423.153	1610.6	-4.94e-05	0.735375	0.81588	1	-0.428713	0.664812	34.0208	30.915	36.0112	35.5385	36.0941	39.2065	0.136356
P46460	Nsf	Vesicle-fusing ATPase OS=Mus musculus OX=10090 GN=Nsf PE=1 SV=2	25783.6	23400.2	24329.8	21382.8	28006.8	25722.5	24930.9	24980.9	0.0873044	0.399182	0.540877	4	-0.364977	0.955455	33.5751	39.7312	34.4084	33.6269	34.8087	35.9187	-0.0422071
P46467	Vps4b	Vacuolar protein sorting-associated protein 4B OS=Mus musculus OX=10090 GN=Vps4b PE=1 SV=2	4800.64	3766.43	4380.76	3853.08	5389.49	7667.6	5215.15	6493.31	0.525955	0.016401	0.0789527	2	-0.695616	0.970977	58.2907	61.948	62.2809	58.9112	57.5736	61.676	-0.034818
P46471	Psmc2	26S proteasome regulatory subunit 7 OS=Mus musculus OX=10090 GN=Psmc2 PE=1 SV=5	62925.7	75672.1	63352.9	52261.4	68768	91055.9	83989.5	78846.1	0.366094	0.0811599	0.190163	11	-0.476505	0.976381	87.6657	98.0634	81.1775	88.7282	88.9155	82.8421	-0.0315389
P46638	Rab11b	Ras-related protein Rab-11B OS=Mus musculus OX=10090 GN=Rab11b PE=1 SV=3	77849.2	61211.3	71830.2	93274.3	105513	117943	73614	106089	0.500645	0.0903951	0.199815	6	-0.741263	0.722056	60.9243	60.1641	56.9325	63.9957	63.926	63.5436	0.105651
P46656	Fdx1	"Adrenodoxin, mitochondrial OS=Mus musculus OX=10090 GN=Fdx1 PE=1 SV=1"	2781.86	2666.32	3244.24	2902.43	2635.6	2376.31	1224.96	2118.65	-0.340725	0.0664784	0.168678	1	0.555176	0.873803	28.1052	30.2305	24.3864	23.4383	29.9147	22.7483	-0.125814
P46935	Nedd4	E3 ubiquitin-protein ligase NEDD4 OS=Mus musculus OX=10090 GN=Nedd4 PE=1 SV=3	57393.6	81806.8	57912.1	58126.2	51270.2	50800.8	64631.9	58996.2	-0.0771564	0.385765	0.528483	10	0.516855	0.941217	1053.21	1132.09	941.395	1089.7	1088.2	1088.95	0.0673809
P46978	Stt3a	Dolichyl-diphosphooligosaccharide--protein glycosyltransferase subunit STT3A OS=Mus musculus OX=10090 GN=Stt3a PE=1 SV=1	4788.66	2023.79	3254.34	3139.48	1438.54	595.887	1770.21	969.626	-1.43639	0.00357468	0.0373188	2	0.7756	0.963532	102.475	103.975	102.976	103.331	92.3265	105.273	-0.0425326
P47738	Aldh2	"Aldehyde dehydrogenase, mitochondrial OS=Mus musculus OX=10090 GN=Aldh2 PE=1 SV=1"	3.15243e+06	1.95811e+06	2.60391e+06	2.6402e+06	2.26972e+06	2.19011e+06	1.4823e+06	1.73263e+06	-0.428683	0.0772111	0.184598	28	0.600696	0.723871	768.114	744.281	633.448	619.857	668.369	602.967	-0.178578
P47740	Aldh3a2	Fatty aldehyde dehydrogenase OS=Mus musculus OX=10090 GN=Aldh3a2 PE=1 SV=2	23776.1	19168.6	23520	24295	26546.3	22143.5	26961.8	25284.2	0.131673	0.353356	0.495788	3	-0.642593	0.913572	50.1264	52.4888	54.1823	59.601	51.0976	59.75	0.117376
P47753	Capza1	F-actin-capping protein subunit alpha-1 OS=Mus musculus OX=10090 GN=Capza1 PE=1 SV=4	14227.1	9287.68	14594.9	10849	15994.5	36983.5	17972.8	36264.7	1.03909	0.0114496	0.064007	5	-0.688001	0.920622	22.1694	27.2226	20.0166	21.3887	20.4973	22.3592	-0.100473
P47754	Capza2	F-actin-capping protein subunit alpha-2 OS=Mus musculus OX=10090 GN=Capza2 PE=1 SV=3	65297.1	67556.3	66146.9	82489.1	94032.8	164045	106932	140676	0.875584	0.00436974	0.0402806	6	-0.790474	0.862985	129.52	148.513	119.916	124.753	120.752	128.073	-0.0859003
P47757	Capzb	F-actin-capping protein subunit beta OS=Mus musculus OX=10090 GN=Capzb PE=1 SV=3	87178.6	91813.8	103273	87726.1	100764	169068	144680	159163	0.757757	0.0142484	0.0724121	10	-0.744638	0.969368	163.231	160.835	140.786	162.906	154.046	163.479	0.0501719
P47758	Srprb	Signal recognition particle receptor subunit beta OS=Mus musculus OX=10090 GN=Srprb PE=1 SV=1	15148.4	19694.6	13760.9	13667.2	16771.4	20329.8	17757.6	21707.9	0.396145	0.12952	0.250469	4	-0.443739	0.994363	25.0664	24.1525	22.598	21.9208	24.1308	24.7715	-0.0207544
P47791	Gsr	"Glutathione reductase, mitochondrial OS=Mus musculus OX=10090 GN=Gsr PE=1 SV=3"	20542.1	12308.1	21628.1	23404.2	21316.1	18666.5	13251.5	22310.3	-0.0795477	0.910376	0.93798	5	-0.211116	0.65693	48.3639	46.39	45.4933	41.6083	39.9747	42.5915	-0.175625
P47911	Rpl6	60S ribosomal protein L6 OS=Mus musculus OX=10090 GN=Rpl6 PE=1 SV=3	119208	165866	104487	106621	114253	151158	145495	152480	0.395524	0.351861	0.494146	10	-0.142998	0.951284	208.326	205.123	193.056	197.137	194.113	193.828	-0.0511586
P47915	Rpl29	60S ribosomal protein L29 OS=Mus musculus OX=10090 GN=Rpl29 PE=1 SV=2	50488.4	74208.4	54234.9	43806.6	67787.1	146736	70815	122809	0.833616	0.0245013	0.0980618	5	-0.577745	0.999821	53.5906	59.1891	51.2804	56.5464	55.2254	53.3885	0.0118594
P47934	Crat	Carnitine O-acetyltransferase OS=Mus musculus OX=10090 GN=Crat PE=1 SV=3	51736.6	73793.3	24985	32660.8	28868.7	28004.8	52562.8	21598.7	-0.531785	0.290569	0.431127	8	0.640564	0.938887	254.01	266.069	228.453	271.355	307.196	243.805	0.132163
P47962	Rpl5	60S ribosomal protein L5 OS=Mus musculus OX=10090 GN=Rpl5 PE=1 SV=3	275415	229223	192493	193441	193848	233648	198995	264534	0.0342134	0.979157	0.987706	11	0.18642	0.848313	167.06	156.105	162.011	151.929	147.274	152.663	-0.102242
P47963	Rpl13	60S ribosomal protein L13 OS=Mus musculus OX=10090 GN=Rpl13 PE=1 SV=3	290063	378366	189089	252947	217959	287448	294726	412099	0.103736	0.631976	0.737742	16	-0.0557017	0.873803	101.239	91.2386	89.1748	98.8183	101.843	99.417	0.0935223
P47964	Rpl36	60S ribosomal protein L36 OS=Mus musculus OX=10090 GN=Rpl36 PE=1 SV=2	17766.3	19602	10269.9	11864	9722.28	9697.03	14030.2	11068.1	-0.484979	0.164922	0.293439	3	0.755724	0.913572	104.784	113.331	98.1845	112.869	119.219	101.032	0.0738494
P47968	Rpia	Ribose-5-phosphate isomerase OS=Mus musculus OX=10090 GN=Rpia PE=1 SV=2	1804.03	1358.93	2326.28	1670.52	1281.6	661.44	415.583	310.698	-1.72731	0.00421299	0.0400333	1	0.725903	0.429197	29.2195	32.9272	25.5844	24.6404	21.8073	22.0674	-0.351238
P48036	Anxa5	Annexin A5 OS=Mus musculus OX=10090 GN=Anxa5 PE=1 SV=1	267553	461610	254374	328529	392883	512287	622637	352229	0.597603	0.0776888	0.184958	15	-0.410757	0.74246	377.547	382.007	338.728	458.928	441.487	476.127	0.327199
P48193	Epb41	Protein 4.1 OS=Mus musculus OX=10090 GN=Epb41 PE=1 SV=2	14743.8	18577.9	15528.9	17748.9	23255.7	20068.9	13327.1	13039	-0.0216786	0.913181	0.939752	5	-0.0826288	0.844071	58.6958	54.9988	59.4633	57.0785	66.2248	60.9562	0.0878108
P48428	Tbca	Tubulin-specific chaperone A OS=Mus musculus OX=10090 GN=Tbca PE=1 SV=3	1841.69	1907.74	3825.75	3535.44	7459.04	18519.3	6696.52	15386.1	2.04439	0.000824564	0.0218861	2	-0.775409	0.742775	42.2863	39.6897	36.4836	35.2429	36.6131	35.588	-0.138374
P48678	Lmna	Prelamin-A/C OS=Mus musculus OX=10090 GN=Lmna PE=1 SV=2	1.69837e+06	1.31543e+06	1.61156e+06	1.3702e+06	1.41269e+06	2.84731e+06	1.63122e+06	2.41384e+06	0.417213	0.127924	0.248255	55	-0.507421	0.469148	120.424	134.863	107.953	143.297	135.681	146.01	0.231756
P48722	Hspa4l	Heat shock 70 kDa protein 4L OS=Mus musculus OX=10090 GN=Hspa4l PE=1 SV=2	11406.7	8190.93	10248.4	9432.9	12868.4	11181.5	11424.8	13719.9	0.302412	0.0829387	0.19112	4	-0.720304	1	30.1919	33.591	29.3299	35.7356	28.1103	28.604	-0.0166441
P48758	Cbr1	Carbonyl reductase [NADPH] 1 OS=Mus musculus OX=10090 GN=Cbr1 PE=1 SV=3	154097	120340	120702	101945	150692	204376	143815	228035	0.542129	0.0362905	0.117605	9	-0.60342	0.840758	41.3139	35.9558	37.2429	39.342	38.3681	50.1981	0.151264
P48962	Slc25a4	ADP/ATP translocase 1 OS=Mus musculus OX=10090 GN=Slc25a4 PE=1 SV=4	59229.7	83624.8	41247	56525.4	28592.7	29897.8	52110.8	28954.6	-0.975692	0.0211669	0.0903502	7	0.802737	0.987257	264.524	271.753	220.287	234.561	235.07	233.32	-0.0999041
P49070	Camlg	Calcium signal-modulating cyclophilin ligand OS=Mus musculus OX=10090 GN=Camlg PE=1 SV=2	1549.89	1421.96	163.052	2220.79	1723.27	6078.59	1683.68	3899.87	0.804262	0.083651	0.191755	1	-0.5475
P49312	Hnrnpa1	Heterogeneous nuclear ribonucleoprotein A1 OS=Mus musculus OX=10090 GN=Hnrnpa1 PE=1 SV=2	101017	99474.1	85295.4	72462.4	75338.2	132337	88978.2	146662	0.236406	0.317121	0.459123	12	-0.324712	0.835542	74.0317	71.6147	78.6805	66.8532	72.7996	66.5784	-0.121474
P49443	Ppm1a	Protein phosphatase 1A OS=Mus musculus OX=10090 GN=Ppm1a PE=1 SV=1	33728.8	22246.1	31079.3	29569.5	32646.1	49178.9	26545	40668.9	0.265383	0.193717	0.327524	6	-0.515309	0.841167	163.15	170.792	144.835	176.721	165.861	169.783	0.100762
P49722	Psma2	Proteasome subunit alpha type-2 OS=Mus musculus OX=10090 GN=Psma2 PE=1 SV=3	42408.9	24218.7	46114.5	46520.6	60236	69727.8	41613	70196.6	0.551387	0.0514185	0.143723	7	-0.795647	0.802084	88.8002	92.6699	80.1146	83.7423	79.943	80.1963	-0.0987552
P49817	Cav1	Caveolin-1 OS=Mus musculus OX=10090 GN=Cav1 PE=1 SV=1	1.0774e+06	1.70349e+06	852113	1.02553e+06	971558	1.35782e+06	2.0583e+06	1.40863e+06	0.395827	0.307409	0.450329	9	-0.166499	0.991324	2679.44	2862.82	2510.94	2591.3	2447.46	2450.93	-0.103101
P50136	Bckdha	"2-oxoisovalerate dehydrogenase subunit alpha, mitochondrial OS=Mus musculus OX=10090 GN=Bckdha PE=1 SV=1"	59210.5	50450.1	57536.5	42911	39621.5	50429.7	32190.1	42303.5	-0.396137	0.100143	0.213729	9	0.715046	0.991714	166.918	163.946	131.557	144.992	163.043	146.943	-0.0171863
P50171	Hsd17b8	Estradiol 17-beta-dehydrogenase 8 OS=Mus musculus OX=10090 GN=Hsd17b8 PE=1 SV=2	37068.6	34282.9	31927.6	27897.9	32268.9	43082.1	26402.2	31738.8	-0.0479511	0.958743	0.974487	4	0.149013
P50172	Hsd11b1	Corticosteroid 11-beta-dehydrogenase isozyme 1 OS=Mus musculus OX=10090 GN=Hsd11b1 PE=1 SV=3	243638	166174	127273	145935	20859	9337.31	14979.3	10218.6	-3.65385	1.32e-06	0.00228229	8	0.948713	0.0639463	133.693	212.301	147.906	84.5503	119.293	73.3874	-0.834574
P50247	Ahcy	Adenosylhomocysteinase OS=Mus musculus OX=10090 GN=Ahcy PE=1 SV=3	65912.9	43024.3	53262.5	47319.9	48365.1	27022.8	40811.1	44400.9	-0.23801	0.122845	0.242323	6	0.574812	0.860334	7.56292	7.9099	8.17247	7.29809	6.08695	8.02153	-0.152086
P50285	Fmo1	Dimethylaniline monooxygenase [N-oxide-forming] 1 OS=Mus musculus OX=10090 GN=Fmo1 PE=1 SV=1	143260	93000.5	120785	100710	96286.3	80800.4	75430.1	63265.1	-0.498501	0.0305485	0.108707	15	0.771208	0.367897	193.943	205.372	200.344	151.811	188.502	120.836	-0.402148
P50396	Gdi1	Rab GDP dissociation inhibitor alpha OS=Mus musculus OX=10090 GN=Gdi1 PE=1 SV=3	89110.1	95603.9	85357.6	77559.5	92124.8	136757	109521	129711	0.450623	0.0466082	0.137006	9	-0.617812	0.98002	114.691	105.158	112.812	110.189	111.73	105.214	-0.0236345
P50427	Sts	Steryl-sulfatase OS=Mus musculus OX=10090 GN=Sts PE=1 SV=1	7.42283	7.42283	7.42283	93.5294	64.4844	1511.15	100.629	7.42283	3.43993	0.109746	0.22561	1	-0.316274
P50429	Arsb	Arylsulfatase B OS=Mus musculus OX=10090 GN=Arsb PE=1 SV=3	148.17	927.587	409.043	1079.86	233.985	193.175	468.87	722.89	-0.895064	0.481687	0.616061	1	0.128209	0.799623	55.3126	59.2098	49.9475	61.8082	55.0277	60.1002	0.107156
P50516	Atp6v1a	V-type proton ATPase catalytic subunit A OS=Mus musculus OX=10090 GN=Atp6v1a PE=1 SV=2	37334.7	54001.3	48177.3	48248	59383.5	86120.9	74057.9	81607.1	0.689262	0.0065304	0.0482981	8	-0.813039	0.844128	88.4558	110.323	85.4124	85.1218	78.4599	92.3551	-0.144796
P50518	Atp6v1e1	V-type proton ATPase subunit E 1 OS=Mus musculus OX=10090 GN=Atp6v1e1 PE=1 SV=2	32354.2	33562.1	29200.1	25241.6	35189.1	48520.7	29486.8	63339.1	0.426901	0.0848308	0.193691	6	-0.555429	0.987589	142.769	154.632	120.59	135.809	132.122	141.068	-0.0242688
P50543	S100a11	Protein S100-A11 OS=Mus musculus OX=10090 GN=S100a11 PE=1 SV=1	162120	167377	217802	214188	332904	435453	361323	392227	0.991501	0.000365836	0.017135	6	-0.925265	0.921316	139.791	161.146	143.233	206.36	179.802	191.591	0.379866
P50544	Acadvl	"Very long-chain specific acyl-CoA dehydrogenase, mitochondrial OS=Mus musculus OX=10090 GN=Acadvl PE=1 SV=3"	233906	222960	188256	174571	143144	118797	142568	80779.4	-0.654666	0.0075993	0.051722	19	0.96165	0.98002	166.999	175.667	138.07	151.634	165.49	151.243	-0.031291
P50580	Pa2g4	Proliferation-associated protein 2G4 OS=Mus musculus OX=10090 GN=Pa2g4 PE=1 SV=3	59654.7	42095.7	53137.8	40402.6	48258.5	60932.3	44600.8	57985.9	0.161539	0.54301	0.666507	7	-0.149868	0.971132	61.6941	62.2385	55.6165	62.7738	59.551	61.0729	0.0321236
P51125	Cast	Calpastatin OS=Mus musculus OX=10090 GN=Cast PE=1 SV=2	8638.36	15755.8	14018.5	14931.1	10458.8	37348.3	16226.4	27836.6	0.554838	0.138052	0.260047	7	-0.533213	1	179.113	187.304	158.704	179.578	176.44	170.677	0.00748976
P51150	Rab7a	Ras-related protein Rab-7a OS=Mus musculus OX=10090 GN=Rab7a PE=1 SV=2	127428	143176	115089	152818	127108	135041	141782	133776	-0.00712184	0.97397	0.984767	9	-0.0604736
P51174	Acadl	"Long-chain specific acyl-CoA dehydrogenase, mitochondrial OS=Mus musculus OX=10090 GN=Acadl PE=1 SV=2"	452375	239326	389847	368808	476782	399193	268301	405795	0.0860299	0.699113	0.789806	14	-0.225417	0.735664	184.604	202.178	163.209	211.445	219.103	193.808	0.186582
P51410	Rpl9	60S ribosomal protein L9 OS=Mus musculus OX=10090 GN=Rpl9 PE=2 SV=2	30475.2	27937.6	15620.7	21321.9	16645.6	21270.5	14331.2	24027.9	-0.375279	0.282685	0.424552	3	0.579886	0.87836	299.268	287.435	282.46	266.881	283.121	267.112	-0.0892207
P51660	Hsd17b4	Peroxisomal multifunctional enzyme type 2 OS=Mus musculus OX=10090 GN=Hsd17b4 PE=1 SV=3	456746	412101	417695	327953	457790	462766	438504	442009	0.116657	0.3198	0.46146	23	-0.243706	0.850895	255.063	274.989	197.206	260.398	276.299	262.423	0.149636
P51855	Gss	Glutathione synthetase OS=Mus musculus OX=10090 GN=Gss PE=1 SV=1	5881.15	4349.64	4712.4	5095.78	8073.74	6295.68	5588.1	11667.3	0.540917	0.0387055	0.121329	3	-0.684854	0.678179	20.7918	20.1281	20.9783	18.2947	17.7536	19.0326	-0.168706
P51859	Hdgf	Hepatoma-derived growth factor OS=Mus musculus OX=10090 GN=Hdgf PE=1 SV=2	9193.17	4923.71	4730.9	5999.11	7519.45	6468.45	7682.5	9298.89	0.483854	0.176623	0.306905	1	-0.356286	0.835131	158.044	152.952	135.607	139.652	134.618	140.893	-0.102509
P51863	Atp6v0d1	V-type proton ATPase subunit d 1 OS=Mus musculus OX=10090 GN=Atp6v0d1 PE=1 SV=2	12159.8	12359	4994.86	9365.87	9426.25	6881.53	8819.34	7257.75	-0.415634	0.545755	0.667272	3	0.552094	1	110.518	113.559	91.9924	106.307	106.959	104.553	0.0140749
P51881	Slc25a5	ADP/ATP translocase 2 OS=Mus musculus OX=10090 GN=Slc25a5 PE=1 SV=3	431874	509015	300469	397067	246431	246845	305712	199927	-0.7476	0.0102404	0.0596804	13	0.894212	0.331625	186.184	222.984	172.387	157.25	168.382	150.659	-0.281077
P51885	Lum	Lumican OS=Mus musculus OX=10090 GN=Lum PE=1 SV=2	111232	105850	112005	128511	89226.6	87662.8	75015	100672	-0.335771	0.0427039	0.128955	5	0.577407	0.997854	78.0226	93.6449	86.9815	96.1775	71.712	95.1565	0.0154724
P51912	Slc1a5	Neutral amino acid transporter B(0) OS=Mus musculus OX=10090 GN=Slc1a5 PE=1 SV=2	312079	413360	262331	442175	305911	263181	345141	170109	-0.340072	0.162658	0.290604	8	0.501602	0.850895	1820.33	1434.95	1473.91	1644.43	1996.02	1607.81	0.151656
P52196	Tst	Thiosulfate sulfurtransferase OS=Mus musculus OX=10090 GN=Tst PE=1 SV=3	19504.8	12505.2	15124.7	14100.2	13712.7	10864.8	3559.75	7905.07	-0.656057	0.0485726	0.140146	4	0.680438	3.19e-11	55.11	49.6676	53.5581	24.9754	28.4563	20.6083	-1.10775
P52480	Pkm	Pyruvate kinase PKM OS=Mus musculus OX=10090 GN=Pkm PE=1 SV=4	1.2546e+06	995148	1.00809e+06	949849	743782	880688	843012	922686	-0.217136	0.0928532	0.203948	37	0.798469	0.515678	247.669	297.247	202.268	204.429	199.057	202.485	-0.284582
P52623	Uck1	Uridine-cytidine kinase 1 OS=Mus musculus OX=10090 GN=Uck1 PE=1 SV=2	2339.92	3178.71	2308.44	2210.97	1237.75	1236.35	1610.86	1863.85	-0.718911	0.00551046	0.0450099	2	0.838959	1	114.103	105.676	83.5902	94.5221	120.455	91.2852	0.014757
P52825	Cpt2	"Carnitine O-palmitoyltransferase 2, mitochondrial OS=Mus musculus OX=10090 GN=Cpt2 PE=1 SV=2"	189263	128878	145014	134868	173317	98832.2	111057	88955.4	-0.416696	0.16212	0.290242	15	0.552641	0.993168	88.7192	101.756	79.3216	94.2068	91.6097	87.8612	0.0275197
P52840	Sult1a1	Sulfotransferase 1A1 OS=Mus musculus OX=10090 GN=Sult1a1 PE=1 SV=1	4599.64	6097.23	6861.99	7264.35	2730.86	4638.5	5048.59	5196.12	-0.418621	0.0756975	0.183216	2	0.416175	0.967784	176.135	149.508	161.876	139.849	160.003	131.691	-0.177559
P53026	Rpl10a	60S ribosomal protein L10a OS=Mus musculus OX=10090 GN=Rpl10a PE=1 SV=3	181339	164386	149450	151977	120720	130374	134080	139464	-0.257597	0.0746945	0.181551	11	0.899624	1	65.3609	64.9974	64.3055	62.9315	66.9663	63.5825	-0.00930244
P53395	Dbt	"Lipoamide acyltransferase component of branched-chain alpha-keto acid dehydrogenase complex, mitochondrial OS=Mus musculus OX=10090 GN=Dbt PE=1 SV=2"	81549.8	95985.5	65550.8	57553.9	91642.3	161981	86217.7	87920.9	0.295962	0.102767	0.217931	12	-0.313675	0.72439	89.0636	88.7286	82.173	75.8988	83.1068	76.111	-0.14525
P53810	Pitpna	Phosphatidylinositol transfer protein alpha isoform OS=Mus musculus OX=10090 GN=Pitpna PE=1 SV=2	5517.06	4691.55	8063.54	8444.93	8199.7	8139.73	4201.08	9124.22	0.292619	0.671186	0.767584	3	-0.49275	0.909658	97.9369	99.4947	97.0878	103.587	93.5624	111.712	0.0648851
P53986	Slc16a1	Monocarboxylate transporter 1 OS=Mus musculus OX=10090 GN=Slc16a1 PE=1 SV=1	118037	110324	86776.8	64539.3	67603.3	115085	99251.5	86717.9	-0.0767795	0.905503	0.935741	7	0.404689	0.391016	64.5709	84.1026	65.2335	57.7485	56.6591	56.4234	-0.313421
P53994	Rab2a	Ras-related protein Rab-2A OS=Mus musculus OX=10090 GN=Rab2a PE=1 SV=1	67055.7	59735.2	62953.9	69196.1	74797.5	41986.1	72976.4	39513.8	-0.231156	0.369928	0.512049	4	0.291239	0.648771	105.19	109.078	110.822	102.011	93.9578	99.0279	-0.140627
P53996	Cnbp	Cellular nucleic acid-binding protein OS=Mus musculus OX=10090 GN=Cnbp PE=1 SV=2	11996.2	9904.98	12742.3	10838.3	9551.62	14910.9	7426.13	13818.1	0.0108351	0.869427	0.911845	3	-0.0845616	0.688401	325.3	331.33	300.918	278.646	307.987	277.928	-0.147798
P54071	Idh2	"Isocitrate dehydrogenase [NADP], mitochondrial OS=Mus musculus OX=10090 GN=Idh2 PE=1 SV=3"	152413	151981	157887	131563	124440	114945	142891	101914	-0.347743	0.103263	0.218237	13	0.821156	0.835542	112.28	111.402	117.992	126.645	132.567	118.326	0.142904
P54116	Stom	Erythrocyte band 7 integral membrane protein OS=Mus musculus OX=10090 GN=Stom PE=1 SV=3	16457	12912.5	12737.1	18093.7	13115.6	27331.7	17299.6	18754.6	0.30526	0.244369	0.383945	4	-0.434223	0.902575	91.2515	101.133	84.4169	97.3994	102.51	94.4562	0.0918941
P54227	Stmn1	Stathmin OS=Mus musculus OX=10090 GN=Stmn1 PE=1 SV=2	16172.2	12312.5	10166.1	7124.56	9846.02	14890.3	7329.75	15838.3	0.114049	0.860482	0.906514	2	0.1138	0.90079	3.0655	3.67812	3.73514	4.75587	3.49161	4.3058	0.254542
P54310	Lipe	Hormone-sensitive lipase OS=Mus musculus OX=10090 GN=Lipe PE=1 SV=2	1.09357e+06	1.19965e+06	1.12782e+06	1.15423e+06	1.45795e+06	1.50525e+06	1.48517e+06	1.35338e+06	0.367049	0.0365432	0.117605	33	-0.830721	0.442794	1199.69	1270.47	933.921	1291	1487.73	1350.01	0.288393
P54728	Rad23b	UV excision repair protein RAD23 homolog B OS=Mus musculus OX=10090 GN=Rad23b PE=1 SV=2	8347.26	5170.09	8116.97	7619.55	7417.01	8229.47	4223.18	4311.1	-0.475877	0.29632	0.438908	2	0.317775	0.942894	77.4756	86.2393	74.6312	79.9388	74.9006	74.3212	-0.0547399
P54775	Psmc4	26S proteasome regulatory subunit 6B OS=Mus musculus OX=10090 GN=Psmc4 PE=1 SV=2	16575.7	22480.5	19007	16104.3	15765.5	18895.1	18363.8	15552.3	-0.0609799	0.556956	0.678288	7	0.494245	0.953144	70.1622	71.4073	58.451	60.4484	67.0899	63.1545	-0.0644364
P54822	Adsl	Adenylosuccinate lyase OS=Mus musculus OX=10090 GN=Adsl PE=1 SV=2	19693.9	19595.6	18442.8	17548.5	19734.6	18069.3	20108.8	16058.2	-0.00966265	0.850209	0.897875	3	0.400261	0.866671	37.1811	39.8349	33.143	33.5481	37.5771	31.8528	-0.0966009
P54869	Hmgcs2	"Hydroxymethylglutaryl-CoA synthase, mitochondrial OS=Mus musculus OX=10090 GN=Hmgcs2 PE=1 SV=2"	6177.13	2580.8	2789.67	2323.24	7816.38	3818.12	6261.07	4744.11	1.02232	0.0582955	0.154238	2	-0.376611	0.00224277	49.5794	36.6611	51.1454	69.4151	74.0355	74.4574	0.680429
P55096	Abcd3	ATP-binding cassette sub-family D member 3 OS=Mus musculus OX=10090 GN=Abcd3 PE=1 SV=2	1951.6	2572.64	1664.27	1581.74	902.22	335.254	934.337	5688.83	-0.972987	0.329598	0.470254	2	-0.0892319	0.776942	100.935	113.372	96.1092	91.5857	93.241	97.3159	-0.134755
P55258	Rab8a	Ras-related protein Rab-8A OS=Mus musculus OX=10090 GN=Rab8a PE=1 SV=2	11553.1	15486.2	13624.9	14357.6	12137.1	12300	18626.5	13738.5	-0.105586	0.874682	0.915352	4	-0.104678	0.907608	59.7898	61.7613	56.342	56.3887	55.4726	57.9019	-0.0666736
P55264	Adk	Adenosine kinase OS=Mus musculus OX=10090 GN=Adk PE=1 SV=2	27894.2	37244.4	43336.1	36118.5	41674.6	34144.9	34658.3	57876	0.0513053	0.396911	0.538221	7	-0.533704	0.331625	85.0119	103.851	76.7402	71.2479	70.8222	70.6249	-0.308954
P55302	Lrpap1	Alpha-2-macroglobulin receptor-associated protein OS=Mus musculus OX=10090 GN=Lrpap1 PE=1 SV=1	38583.7	26390.2	46324.5	39699.7	38033.5	47826	19881.9	43609.7	0.0574006	0.845948	0.895365	7	-0.154162	0.942894	170.767	200.352	145.325	168.148	163.068	162.001	-0.0542121
P56135	Atp5mf	"ATP synthase subunit f, mitochondrial OS=Mus musculus OX=10090 GN=Atp5mf PE=1 SV=3"	91582.2	109557	90185.3	94862	143617	169399	106964	153231	0.670446	0.0165541	0.0789619	4	-0.72807
P56375	Acyp2	Acylphosphatase-2 OS=Mus musculus OX=10090 GN=Acyp2 PE=1 SV=2	25093.3	20967.5	25789.9	22194.9	32039.4	22412.6	23000.5	27728.1	0.0977441	0.417992	0.560232	3	-0.436355	0.939602	24.5397	25.1482	18.7006	24.2463	25.2678	24.2074	0.120618
P56379	Mp68	6.8 kDa mitochondrial proteolipid OS=Mus musculus OX=10090 GN=Mp68 PE=1 SV=1	8503.01	7788.89	5504.44	5995.1	4504.21	3082.08	5063.39	2903.12	-0.875011	0.00761056	0.051722	1	0.930184
P56380	Nudt2	Bis(5'-nucleosyl)-tetraphosphatase [asymmetrical] OS=Mus musculus OX=10090 GN=Nudt2 PE=1 SV=3	1494.8	1609.54	1042.55	1733.13	389.033	67.0819	362.108	304.576	-2.22362	0.000942109	0.0233239	2	0.856897	0.999623	14.5522	14.4858	11.26	13.9197	13.5517	12.2236	-0.0139371
P56382	Atp5f1e	"ATP synthase subunit epsilon, mitochondrial OS=Mus musculus OX=10090 GN=Atp5f1e PE=1 SV=2"	36490.1	39167.4	30460	29679.5	24439.9	25635.4	27987.2	22836.6	-0.413523	0.0315072	0.110586	2	0.963286
P56391	Cox6b1	Cytochrome c oxidase subunit 6B1 OS=Mus musculus OX=10090 GN=Cox6b1 PE=1 SV=2	4531.31	4997.58	3803.86	3430.29	8927.63	30788.6	7351.32	14622.7	1.46051	0.00363752	0.0375228	2	-0.553439	0.784894	188.473	193.693	157.726	159.832	159.41	158.752	-0.169826
P56395	Cyb5a	Cytochrome b5 OS=Mus musculus OX=10090 GN=Cyb5a PE=1 SV=2	518748	606724	460720	566391	353009	258570	222993	227464	-1.16032	0.000623732	0.0208935	8	0.872253	0.162396	529.366	517.881	497.19	418.291	451.744	390.334	-0.295319
P56399	Usp5	Ubiquitin carboxyl-terminal hydrolase 5 OS=Mus musculus OX=10090 GN=Usp5 PE=1 SV=1	135353	126587	157027	138472	141301	162065	138256	166692	0.144511	0.439197	0.579686	17	-0.609088	0.911315	110.963	120.882	91.8575	96.3943	110.148	98.7945	-0.0773948
P56480	Atp5f1b	"ATP synthase subunit beta, mitochondrial OS=Mus musculus OX=10090 GN=Atp5f1b PE=1 SV=2"	1.42706e+06	1.18472e+06	1.54606e+06	1.90244e+06	2.39362e+06	2.33814e+06	1.07373e+06	1.94073e+06	0.520164	0.313662	0.456403	22	-0.572098
P56959	Fus	RNA-binding protein FUS OS=Mus musculus OX=10090 GN=Fus PE=1 SV=1	4144.55	6393.33	8179.19	10067	8810.42	5654.43	6376.89	5703.12	-0.261961	0.824868	0.880774	1	-0.165089	0.979189	191.228	167.597	245.629	184.269	233.884	157.954	-0.0698869
P57759	Erp29	Endoplasmic reticulum resident protein 29 OS=Mus musculus OX=10090 GN=Erp29 PE=1 SV=2	41831.4	42988.3	48796.5	56208.9	73498.6	108948	68567.6	92576.7	0.848822	0.00270127	0.0339486	6	-0.847639	0.964611	108.208	103.934	95.0294	105.519	100.706	112.49	0.0538411
P57776	Eef1d	Elongation factor 1-delta OS=Mus musculus OX=10090 GN=Eef1d PE=1 SV=3	173717	160842	170369	161097	198963	303593	159501	270609	0.486059	0.0800037	0.188701	10	-0.602679	0.935937	84.1002	81.2607	76.099	83.8999	83.2057	83.4646	0.054657
P57780	Actn4	Alpha-actinin-4 OS=Mus musculus OX=10090 GN=Actn4 PE=1 SV=1	690637	567515	707341	688013	800046	1.08876e+06	807679	983611	0.370752	0.025935	0.101579	39	-0.792889	0.090464	395.253	383.376	341.31	476.27	502.687	454.63	0.357838
P57784	Snrpa1	U2 small nuclear ribonucleoprotein A' OS=Mus musculus OX=10090 GN=Snrpa1 PE=1 SV=2	2992.12	1837.3	1456.52	2545.92	2350.87	2319.38	1745.56	2772.89	0.110582	0.731714	0.81338	1	-0.0885912	0.99161	13.7823	13.0959	13.7065	12.9541	14.6392	13.8189	0.0276958
P58252	Eef2	Elongation factor 2 OS=Mus musculus OX=10090 GN=Eef2 PE=1 SV=2	658407	589432	559802	488469	511549	541918	587959	573708	-0.0429251	0.778693	0.846482	30	0.495603	0.963038	1357.46	1396.82	1177.15	1370.78	1312.85	1408.41	0.0611374
P58281	Opa1	"Dynamin-like 120 kDa protein, mitochondrial OS=Mus musculus OX=10090 GN=Opa1 PE=1 SV=1"	24300.7	23275.6	27650.7	18963.1	22628.7	28145	21038.8	21490	-0.109002	0.954699	0.971517	6	0.180337	0.860334	87.686	98.5197	77.5669	82.1066	83.4776	80.7021	-0.0922356
P58389	Ptpa	Serine/threonine-protein phosphatase 2A activator OS=Mus musculus OX=10090 GN=Ptpa PE=1 SV=1	25968.8	27347.4	29515.3	32733.5	31110.2	70969.1	30140.9	71178.2	0.725857	0.063736	0.163153	7	-0.639246	0.913572	205.794	218.856	179.372	210.184	218.46	209.099	0.0830229
P58771	Tpm1	Tropomyosin alpha-1 chain OS=Mus musculus OX=10090 GN=Tpm1 PE=1 SV=1	200.99	7052.12	9304.54	8909.39	8742.81	9271.85	5290.41	10787.1	0.183786	0.279863	0.422475	3	-0.594203	0.201186	159.341	138.825	175.677	186.673	194.361	420.78	0.657999
P58774	Tpm2	Tropomyosin beta chain OS=Mus musculus OX=10090 GN=Tpm2 PE=1 SV=1	14751.3	7241.35	7980.74	9116.24	9669.42	6606.51	4822.08	8497.9	-0.186983	0.220231	0.357709	4	0.468622	0.117021	80.3524	66.9266	88.6012	90.3639	104.759	418.348	1.01838
P58871	Tnks1bp1	182 kDa tankyrase-1-binding protein OS=Mus musculus OX=10090 GN=Tnks1bp1 PE=1 SV=2	7200.65	32169.9	11708.3	17722.9	14672.7	23257.7	37887.1	30679	0.890908	0.144701	0.266774	11	-0.382123	0.367897	150.549	161.291	152.613	186.949	179.777	172.35	0.214807
P59017	Bcl2l13	Bcl-2-like protein 13 OS=Mus musculus OX=10090 GN=Bcl2l13 PE=1 SV=2	17026.4	21308.9	20925.5	18262.1	20282.4	31655.3	16514.8	27860.6	0.282167	0.271575	0.413931	3	-0.46107	0.139875	74.6799	82.7543	59.7164	87.7428	96.1083	92.4135	0.359455
P59325	Eif5	Eukaryotic translation initiation factor 5 OS=Mus musculus OX=10090 GN=Eif5 PE=1 SV=1	14084.4	11395.9	11067.2	13550.7	18951.7	22395.7	13428.5	17809.9	0.56406	0.029381	0.107194	4	-0.687382	0.607009	191.471	212.757	205.187	183.48	180.494	174.004	-0.178858
P59808	Sash1	SAM and SH3 domain-containing protein 1 OS=Mus musculus OX=10090 GN=Sash1 PE=1 SV=1	1040.7	1689.06	648.656	568.597	565.692	937.555	1700.83	998.171	0.23563	0.786892	0.852474	1	0.197054	0.169642	161.367	145.795	137.007	180.702	173.252	172.856	0.249172
P59999	Arpc4	Actin-related protein 2/3 complex subunit 4 OS=Mus musculus OX=10090 GN=Arpc4 PE=1 SV=3	38196.6	31021.6	32292	38584.6	38694.4	56459.7	47152.7	50754.7	0.478131	0.0315232	0.110586	3	-0.744987	0.986818	60.904	65.0182	55.7514	62.7935	59.6746	62.4931	0.0283466
P60229	Eif3e	Eukaryotic translation initiation factor 3 subunit E OS=Mus musculus OX=10090 GN=Eif3e PE=1 SV=1	13298.8	15435.6	15304.8	14259.9	16076.6	25907.7	17684	17506.8	0.25221	0.0768066	0.184598	5	-0.547906	0.651003	104.399	113.829	105.659	98.3847	101.101	99.9812	-0.112119
P60335	Pcbp1	Poly(rC)-binding protein 1 OS=Mus musculus OX=10090 GN=Pcbp1 PE=1 SV=1	218172	203558	196675	181700	258713	306712	262334	324240	0.50352	0.0092901	0.0574991	11	-0.780663	0.901467	108.35	102.959	90.9126	105.203	105.896	107.763	0.0811251
P60710	Actb	"Actin, cytoplasmic 1 OS=Mus musculus OX=10090 GN=Actb PE=1 SV=1"	1.23487e+07	1.31131e+07	1.18072e+07	1.13843e+07	1.27773e+07	2.22774e+07	1.78457e+07	1.96803e+07	0.634154	0.0231308	0.095984	31	-0.654699	0.854225	1123.23	1101.08	1018.47	1199.07	1200.46	1282.03	0.183658
P60766	Cdc42	Cell division control protein 42 homolog OS=Mus musculus OX=10090 GN=Cdc42 PE=1 SV=2	114047	127584	112496	119797	143834	220368	164276	209184	0.665337	0.00883525	0.0565	4	-0.760261	0.902575	371.875	390.201	326.935	347.779	328.453	346.621	-0.0869404
P60843	Eif4a1	Eukaryotic initiation factor 4A-I OS=Mus musculus OX=10090 GN=Eif4a1 PE=1 SV=1	193560	170427	176031	199273	231601	219689	203569	246609	0.289247	0.0890592	0.19838	13	-0.861806	0.848313	217.889	257.419	205.963	207.937	220.957	202.602	-0.103845
P60867	Rps20	40S ribosomal protein S20 OS=Mus musculus OX=10090 GN=Rps20 PE=1 SV=1	76275.8	71275.8	62303.9	57452.2	51106.1	52725.5	43524.2	36479.1	-0.498712	0.0168595	0.0789619	5	0.954314	1	187.217	175.335	168.574	173.213	185.042	175.405	0.0076265
P61021	Rab5b	Ras-related protein Rab-5B OS=Mus musculus OX=10090 GN=Rab5b PE=1 SV=1	40234.4	42278.5	45531.3	50788.6	54200.9	66624.1	69134.9	76175.8	0.629338	0.00923564	0.0573669	6	-0.900934	1	67.4071	70.3079	63.9512	69.021	63.0856	70.4887	0.00606032
P61022	Chp1	Calcineurin B homologous protein 1 OS=Mus musculus OX=10090 GN=Chp1 PE=1 SV=2	3139.79	1960.64	2987.1	4399.22	1418.7	2142.15	887.815	1744.44	-0.961037	0.0133781	0.0698322	2	0.494497	0.910227	301.597	326.704	257.743	316.563	316.515	319.949	0.112022
P61027	Rab10	Ras-related protein Rab-10 OS=Mus musculus OX=10090 GN=Rab10 PE=1 SV=1	91347.4	98888.7	94743.9	100526	119948	138194	134421	131792	0.45952	0.0125256	0.0676225	4	-0.886403	0.831493	116.028	128.91	112.019	111.864	111.977	112.043	-0.0851934
P61028	Rab8b	Ras-related protein Rab-8B OS=Mus musculus OX=10090 GN=Rab8b PE=1 SV=1	981.164	1174.28	1376.96	1652.52	477.802	984.251	1441.02	2381.86	-0.0945393	0.706715	0.794767	1	-0.240946	0.995403	44.8389	48.7963	42.625	46.5548	41.7544	46.3072	-0.0170432
P61082	Ube2m	NEDD8-conjugating enzyme Ubc12 OS=Mus musculus OX=10090 GN=Ube2m PE=1 SV=1	9163.83	11217	10148.4	7850.18	10031.8	14973.4	10559.2	15883.2	0.382814	0.0940144	0.205456	4	-0.539875	0.913651	76.3817	80.2028	67.5618	68.9028	70.8469	69.302	-0.096974
P61087	Ube2k	Ubiquitin-conjugating enzyme E2 K OS=Mus musculus OX=10090 GN=Ube2k PE=1 SV=3	6054.82	4499.26	3485.52	6814.6	2463.94	304.067	1888.99	318.719	-2.7499	0.00553208	0.0450099	2	0.772433	0.931621	66.5157	63.3171	63.1414	61.8476	63.1598	60.7811	-0.05451
P61089	Ube2n	Ubiquitin-conjugating enzyme E2 N OS=Mus musculus OX=10090 GN=Ube2n PE=1 SV=1	3660.47	3397.06	2773.92	2859.72	11664.8	11786.1	9017.91	18765.1	1.91147	2.45e-05	0.0141398	2	-0.850525	0.988693	24.0737	22.8456	24.6226	23.9901	21.9309	24.4603	-0.0245063
P61161	Actr2	Actin-related protein 2 OS=Mus musculus OX=10090 GN=Actr2 PE=1 SV=1	75348.6	56147.5	63051.1	63767.4	61411.8	68963.4	76290.4	73825.7	0.170306	0.47325	0.607512	7	-0.320423	0.967805	128.588	141.19	122.244	130.744	116.327	132.839	-0.0451826
P61164	Actr1a	Alpha-centractin OS=Mus musculus OX=10090 GN=Actr1a PE=1 SV=1	51899.7	60925.7	53355.1	58913.5	56841.4	85681.7	68139.5	96371.4	0.446629	0.0660165	0.167998	9	-0.681764	0.921316	147.003	144.551	120.979	144.007	143.17	143.13	0.066342
P61205	Arf3	ADP-ribosylation factor 3 OS=Mus musculus OX=10090 GN=Arf3 PE=2 SV=2	45297.5	28222.5	17698.1	28464.8	26207.6	27971.8	33766	37770.1	0.116759	0.649493	0.75289	4	0.0760399	0.989171	104.541	102.71	95.4681	103.095	95.8858	108.911	0.0235884
P61222	Abce1	ATP-binding cassette sub-family E member 1 OS=Mus musculus OX=10090 GN=Abce1 PE=1 SV=1	404.789	831.421	2350.52	674.196	3189.67	650.72	4347.88	538.511	0.944313	0.344055	0.48713	3	-0.354009	0.874293	78.995	86.2808	76.7233	79.1899	79.6958	70.6638	-0.0765579
P61255	Rpl26	60S ribosomal protein L26 OS=Mus musculus OX=10090 GN=Rpl26 PE=1 SV=1	140082	134749	83606.1	90857.3	78953.1	101595	82111.1	104917	-0.276734	0.274999	0.417865	9	0.684058	0.835541	137.239	131.503	131.422	127.433	125.596	122.392	-0.0919809
P61290	Psme3	Proteasome activator complex subunit 3 OS=Mus musculus OX=10090 GN=Psme3 PE=1 SV=1	46.8586	51.5333	64.225	125.526	913.263	2240.1	404.049	2074.59	4.5805	6.35e-05	0.0156936	1	-0.75144	0.991671	66.7183	64.1884	60.0707	62.5176	62.1711	64.1272	-0.0152039
P61358	Rpl27	60S ribosomal protein L27 OS=Mus musculus OX=10090 GN=Rpl27 PE=1 SV=2	29762.9	51080.4	19008.5	30573	13721	17211.9	21586.4	9062.03	-0.972989	0.0160321	0.077845	5	0.804555	0.916194	63.5377	54.335	52.124	52.1319	55.7198	53.2718	-0.0725701
P61750	Arf4	ADP-ribosylation factor 4 OS=Mus musculus OX=10090 GN=Arf4 PE=1 SV=2	57293.6	59591.9	53759.2	56686.7	46169.2	29829.9	51500.7	46361.3	-0.300765	0.068462	0.172449	2	0.691853	0.999821	174.738	183.321	152.563	168.601	169.223	168.927	-0.00667681
P61759	Vbp1	Prefoldin subunit 3 OS=Mus musculus OX=10090 GN=Vbp1 PE=1 SV=2	4446.54	3883.82	3612.62	2891.73	3617.32	4907.64	3216.89	4630.27	0.127747	0.528691	0.65632	2	-0.0872578	0.912031	17.9556	16.7883	20.1347	18.5312	15.6279	17.5541	-0.0852311
P61804	Dad1	Dolichyl-diphosphooligosaccharide--protein glycosyltransferase subunit DAD1 OS=Mus musculus OX=10090 GN=Dad1 PE=1 SV=3	3571.89	2051.82	2116.21	2401.87	881.168	1338.39	2562.79	305.442	-1.05382	0.0468808	0.137006	1	0.740807	0.951284	55.6975	58.712	57.0675	59.8966	58.2657	60.7617	0.0614482
P61922	Abat	"4-aminobutyrate aminotransferase, mitochondrial OS=Mus musculus OX=10090 GN=Abat PE=1 SV=1"	1384.94	1589.68	1633.51	1270.23	1251.67	538.694	918.782	736.17	-0.851329	0.0120888	0.0658804	1	0.783395	0.332763	39.2678	36.4537	46.1513	51.7969	44.7946	51.7155	0.287003
P61924	Copz1	Coatomer subunit zeta-1 OS=Mus musculus OX=10090 GN=Copz1 PE=1 SV=1	2933.32	2402.51	2960.41	3023.67	8735.66	3762.62	2650.28	9073.75	0.960161	0.0496241	0.141009	3	-0.674294	0.716615	102.86	110.8	105.288	98.2271	96.1083	93.8726	-0.145758
P61957	Sumo2	Small ubiquitin-related modifier 2 OS=Mus musculus OX=10090 GN=Sumo2 PE=1 SV=1	36290.8	36346.2	35453.5	29452.5	40070.6	59707.7	52159.3	61285.1	0.637655	0.00993053	0.0596804	3	-0.719431
P61967	Ap1s1	AP-1 complex subunit sigma-1A OS=Mus musculus OX=10090 GN=Ap1s1 PE=1 SV=1	5395.81	10078.6	5493.22	5471.56	7996.13	6277.58	6671.92	6415.23	0.254999	0.688265	0.779584	1	0.119309	1	58.7566	59.9566	48.1928	57.9062	52.2099	55.8398	-0.00271828
P61979	Hnrnpk	Heterogeneous nuclear ribonucleoprotein K OS=Mus musculus OX=10090 GN=Hnrnpk PE=1 SV=1	275697	283464	285396	276995	259433	397874	282020	345621	0.155983	0.349099	0.49226	21	-0.434459	0.921316	310.066	313.739	304.461	294.688	308.556	289.386	-0.0568931
P61982	Ywhag	14-3-3 protein gamma OS=Mus musculus OX=10090 GN=Ywhag PE=1 SV=2	2.02799e+06	1.91383e+06	2.10635e+06	2.019e+06	2.97947e+06	3.69389e+06	1.98407e+06	4.02167e+06	0.713255	0.0306334	0.108786	23	-0.730989	1	452.747	482.512	359.059	440.324	443.217	432.705	0.03549
P62071	Rras2	Ras-related protein R-Ras2 OS=Mus musculus OX=10090 GN=Rras2 PE=1 SV=1	9929.88	11971.6	11365.3	12006.4	8855.23	17418.4	22075.1	13565	0.398121	0.205754	0.340565	2	-0.431374	0.920525	34.1828	36.5781	34.1722	40.0711	33.301	38.0976	0.0835844
P62082	Rps7	40S ribosomal protein S7 OS=Mus musculus OX=10090 GN=Rps7 PE=2 SV=1	123114	114485	88056.6	95914.3	65919	70464.6	74739.1	56399.7	-0.620618	0.00575158	0.0451518	9	0.970703	0.821661	127.596	126.296	131.777	119.885	124.509	115.272	-0.101179
P62137	Ppp1ca	Serine/threonine-protein phosphatase PP1-alpha catalytic subunit OS=Mus musculus OX=10090 GN=Ppp1ca PE=1 SV=1	12486.8	24077.9	22074.8	26249.6	30783.6	35852.3	38457.8	41945.3	0.687615	0.00998389	0.0596804	4	-0.903394	0.910764	252.409	282.436	222.328	238.424	247.701	227.425	-0.0796206
P62141	Ppp1cb	Serine/threonine-protein phosphatase PP1-beta catalytic subunit OS=Mus musculus OX=10090 GN=Ppp1cb PE=1 SV=3	5086.55	4923.47	3675.64	7725.76	5058.6	8352.92	10036.5	10921.7	0.871552	0.0572359	0.153531	2	-0.702378	1	134.301	143.41	136.973	127.138	121.197	169.666	-0.00435801
P62192	Psmc1	26S proteasome regulatory subunit 4 OS=Mus musculus OX=10090 GN=Psmc1 PE=1 SV=1	97285.9	92047.6	92210.8	85132.7	79451.8	88797.3	95275.9	75199.5	-0.133359	0.454057	0.592531	16	0.676835	0.707807	100.348	110.302	87.1164	88.5902	90.2996	88.9118	-0.146343
P62196	Psmc5	26S proteasome regulatory subunit 8 OS=Mus musculus OX=10090 GN=Psmc5 PE=1 SV=1	37350.6	35004	28352	23583.4	20470.9	17522	26568.7	17374.2	-0.734112	0.0238443	0.0966857	6	0.922544	0.833975	94.8778	94.6199	76.4196	79.6235	82.9091	80.6049	-0.122189
P62242	Rps8	40S ribosomal protein S8 OS=Mus musculus OX=10090 GN=Rps8 PE=1 SV=2	143312	268789	97633.2	159124	128128	127194	204703	226681	0.100901	0.809202	0.868864	7	0.064013	0.942894	236.689	217.694	225.45	218.579	216.656	216.22	-0.060681
P62245	Rps15a	40S ribosomal protein S15a OS=Mus musculus OX=10090 GN=Rps15a PE=1 SV=2	27159.4	29646.6	20605.4	21322.9	21413.6	29315.4	25215.2	32634.4	0.176047	0.520957	0.65033	5	-0.0950967	0.70812	150.772	149.363	158.367	139.415	139.537	136.808	-0.140758
P62259	Ywhae	14-3-3 protein epsilon OS=Mus musculus OX=10090 GN=Ywhae PE=1 SV=1	558881	386760	500239	591717	712935	690384	440830	783846	0.408005	0.167036	0.296592	18	-0.677863	0.901467	271.432	275.134	252.647	254.584	247.874	255.867	-0.0749035
P62264	Rps14	40S ribosomal protein S14 OS=Mus musculus OX=10090 GN=Rps14 PE=1 SV=3	189194	298284	115985	210123	196280	268609	246783	330711	0.368827	0.204893	0.339976	6	-0.337075	0.837727	251.234	240.927	237.682	224.925	220.808	233.047	-0.104602
P62267	Rps23	40S ribosomal protein S23 OS=Mus musculus OX=10090 GN=Rps23 PE=1 SV=3	11389.2	20270.3	10972	17942.4	12916.3	16320.4	20017.8	22615.4	0.338463	0.355847	0.497727	2	-0.369106	0.793983	110.943	102.71	110.029	102.839	96.6026	103.074	-0.0973576
P62270	Rps18	40S ribosomal protein S18 OS=Mus musculus OX=10090 GN=Rps18 PE=1 SV=3	182839	178220	124910	156565	106901	94527.8	105225	111547	-0.655331	0.00759109	0.051722	6	0.899399	0.887868	158.774	156.603	158.89	145.978	155.307	146.107	-0.0847395
P62281	Rps11	40S ribosomal protein S11 OS=Mus musculus OX=10090 GN=Rps11 PE=1 SV=3	69109.6	134323	55531	92790.1	78615.7	111074	121573	170184	0.537168	0.179406	0.309672	10	-0.415466	0.983446	258.608	248.084	244.768	244.75	254.177	237.347	-0.0296254
P62301	Rps13	40S ribosomal protein S13 OS=Mus musculus OX=10090 GN=Rps13 PE=1 SV=2	66828	107879	41380.4	72352.3	46356.8	36677.5	55636.8	52464.2	-0.495688	0.106133	0.222135	7	0.646664	0.993512	131.992	121.11	117.705	116.791	127.178	122.431	-0.0163966
P62315	Snrpd1	Small nuclear ribonucleoprotein Sm D1 OS=Mus musculus OX=10090 GN=Snrpd1 PE=1 SV=1	2042.33	2177.92	2979.52	3079.79	1960.14	718.521	440.884	2562.51	-1.10199	0.057021	0.153443	1	0.347847	0.445586	20.6095	18.4893	20.8265	16.7575	17.9514	17.5735	-0.195371
P62317	Snrpd2	Small nuclear ribonucleoprotein Sm D2 OS=Mus musculus OX=10090 GN=Snrpd2 PE=1 SV=1	13728.5	16180.3	10186.9	12920.9	5689.84	10646.4	6999.83	12379.5	-0.625564	0.0556435	0.150637	3	0.667655	0.65214	18.1987	18.1574	16.8278	19.7925	19.6816	19.7135	0.155245
P62320	Snrpd3	Small nuclear ribonucleoprotein Sm D3 OS=Mus musculus OX=10090 GN=Snrpd3 PE=1 SV=1	12275.3	13909	8318.69	16399	10604.3	10246.2	8030.96	16420.1	-0.326014	0.552305	0.673572	3	0.0614477	0.551082	33.5953	33.7984	32.9743	29.9614	27.8878	31.7167	-0.166193
P62334	Psmc6	26S proteasome regulatory subunit 10B OS=Mus musculus OX=10090 GN=Psmc6 PE=1 SV=1	29086.2	27723.2	29074.6	30038.6	28675.3	16082.6	26112.7	18565.2	-0.401372	0.0859	0.195104	10	0.593895	0.414793	87.605	87.7951	78.7817	75.6623	77.0758	72.6287	-0.172207
P62627	Dynlrb1	Dynein light chain roadblock-type 1 OS=Mus musculus OX=10090 GN=Dynlrb1 PE=1 SV=3	4580.42	4111.76	4955.44	5475.03	4697.33	10049.7	4896.27	8863.59	0.46754	0.111273	0.228209	2	-0.606576	0.950823	109.545	104.017	99.9391	108.83	109.505	106.634	0.0527594
P62702	Rps4x	"40S ribosomal protein S4, X isoform OS=Mus musculus OX=10090 GN=Rps4x PE=1 SV=2"	156834	233132	103108	179497	155018	160846	185797	209628	0.0431029	0.627091	0.734786	11	-0.0349888	0.747052	289.969	273.599	274.294	260.26	245.847	262.715	-0.124158
P62715	Ppp2cb	Serine/threonine-protein phosphatase 2A catalytic subunit beta isoform OS=Mus musculus OX=10090 GN=Ppp2cb PE=1 SV=1	69338.3	48727.7	59481.1	58808.9	59935.2	52651.9	41572.1	73438.6	-0.0742883	0.739357	0.818726	7	-0.00393238	0.899625	39.8755	46.3071	42.0851	46.3774	40.123	48.9141	0.0760191
P62717	Rpl18a	60S ribosomal protein L18a OS=Mus musculus OX=10090 GN=Rpl18a PE=1 SV=1	30510.1	35470.5	16033.6	21993.4	18222.4	7494.94	21939.4	16103.6	-0.596629	0.0825429	0.190729	3	0.75264	0.905037	148.381	147.206	161.083	147.416	139.043	144.006	-0.0844661
P62737	Acta2	"Actin, aortic smooth muscle OS=Mus musculus OX=10090 GN=Acta2 PE=1 SV=1"	314150	374911	280098	226122	116723	78521.8	141769	72525	-1.63157	0.000270801	0.0156936	6	0.972344	0.322709	276.922	266.318	343.722	343.857	367.779	753.406	0.636734
P62751	Rpl23a	60S ribosomal protein L23a OS=Mus musculus OX=10090 GN=Rpl23a PE=1 SV=1	167817	236787	93366.3	171493	134773	122666	184839	170314	-0.163152	0.810429	0.869643	8	0.308226	0.418584	130.31	120.301	129.566	113.283	112.348	110.214	-0.178025
P62754	Rps6	40S ribosomal protein S6 OS=Mus musculus OX=10090 GN=Rps6 PE=1 SV=1	92501.9	173046	56975.6	83956.8	55999	68742.7	101518	112645	-0.077131	0.599122	0.713126	8	0.383212	0.935937	118.54	111.775	112.104	109.953	108.937	109.416	-0.0602017
P62806	Hist1h4a	Histone H4 OS=Mus musculus OX=10090 GN=Hist1h4a PE=1 SV=2	3.09355e+06	7.28311e+06	2.07929e+06	5.49937e+06	1.79346e+06	1.74791e+06	4.23366e+06	2.10164e+06	-1.08713	0.105078	0.220641	10	0.541142
P62814	Atp6v1b2	"V-type proton ATPase subunit B, brain isoform OS=Mus musculus OX=10090 GN=Atp6v1b2 PE=1 SV=1"	74704.2	76736.3	84234.7	68436.1	92261.7	142987	108101	136727	0.683217	0.00862034	0.0561618	10	-0.754226	0.967784	112.705	134.49	105.558	117.323	107.033	116.128	-0.0446053
P62821	Rab1A	Ras-related protein Rab-1A OS=Mus musculus OX=10090 GN=Rab1A PE=1 SV=3	192992	205443	199025	207683	184137	162501	179967	193682	-0.151591	0.281855	0.424006	12	0.56769	0.833789	153.608	160.835	149.425	150.392	135.805	147.508	-0.0977328
P62827	Ran	GTP-binding nuclear protein Ran OS=Mus musculus OX=10090 GN=Ran PE=1 SV=3	171428	143592	137315	120478	141001	169515	118226	182834	0.138824	0.67589	0.769966	5	-0.0776294	0.442816	69.7976	83.7915	60.4081	60.5272	60.4161	56.5207	-0.257809
P62830	Rpl23	60S ribosomal protein L23 OS=Mus musculus OX=10090 GN=Rpl23 PE=1 SV=1	68601.8	68288.8	40040.8	56549	40210	34603.1	53189	25079.2	-0.736348	0.0505661	0.14249	5	0.817441	0.659675	217.362	189.047	222.767	188.644	184.968	185.579	-0.166468
P62835	Rap1a	Ras-related protein Rap-1A OS=Mus musculus OX=10090 GN=Rap1a PE=1 SV=1	93010	103286	81386.3	101984	80481	52081.7	84960.8	51434.5	-0.589117	0.0412272	0.12572	7	0.72445	0.993291	42.0635	45.0209	39.4025	44.8994	39.4062	43.7393	0.017533
P62843	Rps15	40S ribosomal protein S15 OS=Mus musculus OX=10090 GN=Rps15 PE=1 SV=2	43096.3	55814.6	31342.9	41770.5	34333.2	49681.5	46914.7	63341.3	0.186349	0.505561	0.638118	4	-0.182734	0.972103	296.897	283.764	258.266	271.946	279.982	263.046	-0.0398479
P62849	Rps24	40S ribosomal protein S24 OS=Mus musculus OX=10090 GN=Rps24 PE=1 SV=1	44459.4	60917.2	24839.6	34286.8	38330.9	54539.9	50526	65124	0.427097	0.218715	0.356569	4	-0.219529	0.833975	288.47	252.44	289.665	253.874	269.922	239.506	-0.120675
P62852	Rps25	40S ribosomal protein S25 OS=Mus musculus OX=10090 GN=Rps25 PE=1 SV=1	94424.4	126236	52922.8	83921.6	52196.2	62829.5	75911.4	78221.4	-0.366221	0.230244	0.369115	7	0.622809	0.857648	141.007	144.468	146	132.419	146.235	127.334	-0.0901532
P62855	Rps26	40S ribosomal protein S26 OS=Mus musculus OX=10090 GN=Rps26 PE=1 SV=3	38187.8	65057.5	27396	39633.3	33394.9	43753.8	49950.3	45530	0.1982	0.789812	0.854397	3	0.161894	0.991184	112.746	112.626	118.751	106.425	104.438	126.303	-0.0343945
P62858	Rps28	40S ribosomal protein S28 OS=Mus musculus OX=10090 GN=Rps28 PE=1 SV=1	36272	45388.4	34261.6	37191	26324.7	26766.1	25091.8	26151.1	-0.485261	0.00659393	0.0482981	3	0.894435	0.835542	57.0549	45.6433	53.17	46.4957	49.4168	47.3383	-0.116086
P62862	Fau	40S ribosomal protein S30 OS=Mus musculus OX=10090 GN=Fau PE=1 SV=1	5652.01	9414.1	4451.72	5819.43	5170.36	8296.58	6134.37	9747.17	0.314895	0.458831	0.595175	1	-0.159774	0.861811	118.601	106.88	100.951	112.14	116.525	120.272	0.0988273
P62869	Elob	Elongin-B OS=Mus musculus OX=10090 GN=Elob PE=1 SV=1	11881.6	10206.8	11683.9	11767.9	5756.14	2292.71	3718.61	2372.73	-1.98096	0.000233716	0.0156936	5	0.861492	0.98805	81.7907	81.883	70.6494	77.101	76.2106	77.1809	-0.0203978
P62874	Gnb1	Guanine nucleotide-binding protein G(I)/G(S)/G(T) subunit beta-1 OS=Mus musculus OX=10090 GN=Gnb1 PE=1 SV=3	269659	255930	225553	219329	250426	317957	282904	276120	0.218196	0.2046	0.339976	11	-0.378782	0.980326	296.614	285.693	270.093	300.915	280.056	288.005	0.028221
P62878	Rbx1	E3 ubiquitin-protein ligase RBX1 OS=Mus musculus OX=10090 GN=Rbx1 PE=1 SV=1	6789.45	7465.55	6198.59	6021.77	5666.78	5538.91	8588.25	9154.99	0.10483	0.669328	0.766653	2	-0.18176	0.600525	51.423	50.5803	51.7865	44.2294	48.2798	47.2021	-0.13943
P62880	Gnb2	Guanine nucleotide-binding protein G(I)/G(S)/G(T) subunit beta-2 OS=Mus musculus OX=10090 GN=Gnb2 PE=1 SV=3	138495	165271	139078	151358	205085	244061	242173	232778	0.71057	0.00243108	0.0326594	7	-0.844876	0.991326	208.407	212.715	186.982	201.315	202.023	193.303	-0.0254639
P62889	Rpl30	60S ribosomal protein L30 OS=Mus musculus OX=10090 GN=Rpl30 PE=1 SV=2	60163.7	40090.1	39290.2	41151.6	37056.1	36204.4	38047.9	45776.5	-0.113334	0.362361	0.505776	3	0.498143	0.588705	122.166	119.181	121.569	108.278	114.646	107.666	-0.135096
P62897	Cycs	"Cytochrome c, somatic OS=Mus musculus OX=10090 GN=Cycs PE=1 SV=2"	186399	216572	211327	203520	214401	251129	119888	232631	0.106858	0.836478	0.88879	10	-0.0762628	0.196887	34.669	40.2498	28.6044	27.4191	28.135	25.647	-0.33751
P62900	Rpl31	60S ribosomal protein L31 OS=Mus musculus OX=10090 GN=Rpl31 PE=1 SV=1	135933	210989	106400	134014	82736.8	132023	120904	160062	-0.0953086	0.409458	0.551132	6	0.418771	0.696566	125.246	123.371	126.023	113.441	116.723	112.257	-0.129875
P62908	Rps3	40S ribosomal protein S3 OS=Mus musculus OX=10090 GN=Rps3 PE=1 SV=1	306946	187073	151525	175415	109075	117915	121684	104479	-0.675652	0.00746095	0.051722	12	0.847774	0.992257	322.079	313.614	293.056	306.966	302.549	307.44	-0.0173433
P62911	Rpl32	60S ribosomal protein L32 OS=Mus musculus OX=10090 GN=Rpl32 PE=1 SV=2	11404.2	17023.5	18797.3	16140.8	23677.7	3401.27	7471.35	32603.8	-0.317634	0.56153	0.682421	3	-0.22493	0.791089	214.992	213.193	207.194	200.113	198.612	188.867	-0.113094
P62918	Rpl8	60S ribosomal protein L8 OS=Mus musculus OX=10090 GN=Rpl8 PE=1 SV=2	126278	166748	85596.7	104370	83357.4	106464	108951	121260	-0.0921305	0.491002	0.624289	9	0.512771	0.97851	341.932	329.276	296.464	318.12	311.225	314.327	-0.0336907
P62960	Ybx1	Nuclease-sensitive element-binding protein 1 OS=Mus musculus OX=10090 GN=Ybx1 PE=1 SV=3	23389.1	28104.5	12660.4	21702.4	7406.94	7566.89	11560.6	17777.7	-1.26835	0.0205068	0.0892923	3	0.72935	0.970276	282.271	271.587	265.47	267.906	271.059	261.217	-0.0338202
P62962	Pfn1	Profilin-1 OS=Mus musculus OX=10090 GN=Pfn1 PE=1 SV=2	273436	239179	265499	324249	327272	244342	341981	341776	0.311818	0.342373	0.485806	8	-0.636272	0.970525	185.657	182.326	175.34	185.274	184.152	196.318	0.0581459
P62983	Rps27a	Ubiquitin-40S ribosomal protein S27a OS=Mus musculus OX=10090 GN=Rps27a PE=1 SV=2	2.38042e+06	1.76659e+06	1.78272e+06	1.7875e+06	2.02657e+06	2.50138e+06	1.85864e+06	3.83881e+06	0.334869	0.190656	0.323295	8	-0.47893	0.933997	169.794	163.158	164.795	158.669	160.621	158.052	-0.060218
P62996	Tra2b	Transformer-2 protein homolog beta OS=Mus musculus OX=10090 GN=Tra2b PE=1 SV=1	6925.77	6859.16	3290.69	7144.32	5409.11	6587.38	8383.59	13033.2	0.108634	0.229524	0.368643	3	-0.446823	0.15687	41.3139	41.2455	50.538	35.5976	37.8737	36.658	-0.267042
P63001	Rac1	Ras-related C3 botulinum toxin substrate 1 OS=Mus musculus OX=10090 GN=Rac1 PE=1 SV=1	114315	134864	92963.4	127155	122902	109574	181217	117583	-0.00420766	0.465604	0.600813	7	-0.203941	0.997854	251.356	241.508	230.899	246.09	232.203	239.74	-0.0110087
P63005	Pafah1b1	Platelet-activating factor acetylhydrolase IB subunit alpha OS=Mus musculus OX=10090 GN=Pafah1b1 PE=1 SV=2	69832.9	30743.5	70119.6	63980.3	57274	42030.3	37382	41243	-0.682977	0.277056	0.418968	8	0.308939	0.965045	182.294	194.564	178.765	186.141	175.007	180.521	-0.0362024
P63011	Rab3a	Ras-related protein Rab-3A OS=Mus musculus OX=10090 GN=Rab3a PE=1 SV=1	3092.01	1847.5	3020.64	2740.42	3180.02	2908.74	2653.87	3426.01	0.0800873	0.343958	0.48713	1	-0.529238	0.966406	9.08232	9.40347	9.23541	9.72208	8.58342	10.7646	0.0625353
P63017	Hspa8	Heat shock cognate 71 kDa protein OS=Mus musculus OX=10090 GN=Hspa8 PE=1 SV=1	3.33883e+06	3.62487e+06	3.05158e+06	3.23586e+06	3.68381e+06	4.705e+06	4.46388e+06	4.69848e+06	0.478501	0.0316957	0.110743	48	-0.722871	0.984514	563.117	622.389	507.515	551.433	564.061	522.116	-0.0437647
P63024	Vamp3	Vesicle-associated membrane protein 3 OS=Mus musculus OX=10090 GN=Vamp3 PE=1 SV=1	40220.7	40454.8	25824.9	33718.8	34032	127987	42184.6	38657.3	0.132981	0.193356	0.327232	5	-0.281611	1	97.3899	102.357	81.8861	95.9213	92.104	92.3357	-0.000310153
P63028	Tpt1	Translationally-controlled tumor protein OS=Mus musculus OX=10090 GN=Tpt1 PE=1 SV=1	56634.3	64238.4	46546	76329.8	83839.9	87909.9	97334.1	84238.7	0.512697	0.0167522	0.0789619	6	-0.809825	0.767117	521.667	546.3	591.757	512.058	502.984	497.059	-0.13253
P63030	Mpc1	Mitochondrial pyruvate carrier 1 OS=Mus musculus OX=10090 GN=Mpc1 PE=1 SV=1	54282.5	57527.7	38314.7	41029.2	30222.8	34054.1	33709.5	37174	-0.478076	0.0311802	0.110051	3	0.891836	0.35812	72.6338	90.4503	50.9598	53.4326	58.9578	47.5718	-0.386539
P63037	Dnaja1	DnaJ homolog subfamily A member 1 OS=Mus musculus OX=10090 GN=Dnaja1 PE=1 SV=1	14834.9	18009.2	16359.7	11318.3	10766.1	13482.1	11087.6	12531.6	-0.402312	0.125483	0.24533	4	0.763992	0.794901	88.5166	84.9946	82.831	77.5542	82.9585	75.9553	-0.116914
P63038	Hspd1	"60 kDa heat shock protein, mitochondrial OS=Mus musculus OX=10090 GN=Hspd1 PE=1 SV=1"	1.17768e+06	1.28831e+06	1.23222e+06	1.22064e+06	1.57841e+06	2.18991e+06	1.04005e+06	1.8292e+06	0.470394	0.139127	0.261504	38	-0.558083	0.84656	185.92	211.782	153.896	159.891	182.546	153.461	-0.145335
P63085	Mapk1	Mitogen-activated protein kinase 1 OS=Mus musculus OX=10090 GN=Mapk1 PE=1 SV=3	31874.4	34963.5	35292.7	26934.2	34674.3	61127.2	53656.7	64509	0.778663	0.0144715	0.0729043	5	-0.694043	0.923338	122.511	130.735	121.974	120.93	119.318	121.984	-0.0501524
P63087	Ppp1cc	Serine/threonine-protein phosphatase PP1-gamma catalytic subunit OS=Mus musculus OX=10090 GN=Ppp1cc PE=1 SV=1	190.898	1537.02	1213.64	1591.26	2145.83	2591.52	2537.07	28.9162	0.772614	0.937779	0.960503	1	-0.323351	0.901467	24.0737	26.8699	26.3267	24.9557	23.9083	24.6354	-0.0707891
P63094	Gnas	Guanine nucleotide-binding protein G(s) subunit alpha isoforms short OS=Mus musculus OX=10090 GN=Gnas PE=1 SV=1	103807	72253.3	91079.9	73795.7	96354.5	131219	94374.5	110401	0.331182	0.107429	0.224048	6	-0.499554	0.918312	787.887	804.003	760.831	823.708	823.521	814.92	0.0659438
P63101	Ywhaz	14-3-3 protein zeta/delta OS=Mus musculus OX=10090 GN=Ywhaz PE=1 SV=1	615876	443985	571236	542242	645877	856582	554283	848641	0.411696	0.0795997	0.188194	16	-0.667107	0.97851	82.4998	77.755	94.945	85.8707	74.9995	88.4838	-0.0319864
P63115	Slc7a10	Asc-type amino acid transporter 1 OS=Mus musculus OX=10090 GN=Slc7a10 PE=1 SV=1	3085.66	1302.87	11673.2	6525.91	13270	24564.1	19838.3	30451.8	2.29847	0.00508252	0.043604	1	-0.879622
P63158	Hmgb1	High mobility group protein B1 OS=Mus musculus OX=10090 GN=Hmgb1 PE=1 SV=2	605716	338165	434566	430407	383128	480723	317119	616915	-0.0111233	0.934609	0.957822	13	-0.0170128	0.716016	69.3114	66.9266	69.5527	65.2569	64.4204	62.9989	-0.0949349
P63168	Dynll1	"Dynein light chain 1, cytoplasmic OS=Mus musculus OX=10090 GN=Dynll1 PE=1 SV=1"	5643.18	5902.8	7156.17	8521.16	7886.14	2763.51	11815.2	6434.19	0.132245	0.861412	0.906942	1	-0.187612	0.873803	54.0161	50.4766	51.1791	57.7682	54.3603	61.3064	0.154769
P63242	Eif5a	Eukaryotic translation initiation factor 5A-1 OS=Mus musculus OX=10090 GN=Eif5a PE=1 SV=2	84942.8	72052.3	60981.1	73005.9	87728.2	113550	62758.5	125741	0.460619	0.152724	0.276853	9	-0.529365	0.905037	237.681	257.834	209.691	217.199	224.862	223.807	-0.077808
P63254	Crip1	Cysteine-rich protein 1 OS=Mus musculus OX=10090 GN=Crip1 PE=1 SV=2	41803.5	60694.5	40990.9	48564.4	42308.8	55161.5	64073.2	112610	0.399931	0.187012	0.318988	3	-0.496862	0.733139	178.951	176.994	177.77	212.056	170.854	274.621	0.27379
P63260	Actg1	"Actin, cytoplasmic 2 OS=Mus musculus OX=10090 GN=Actg1 PE=1 SV=1"	157639	168994	135312	167050	222517	501326	317349	368385	1.07519	0.00186243	0.0301645	1	-0.714699	0.871859	58.7566	73.5647	54.6041	70.0261	62.3935	78.1925	0.177848
P63276	Rps17	40S ribosomal protein S17 OS=Mus musculus OX=10090 GN=Rps17 PE=1 SV=2	24261.3	31933.1	26518.8	36319.9	31214.4	35315.6	30866.3	63694.7	0.190226	0.188749	0.320688	7	-0.594354	0.910392	144.127	143.534	141.714	134.981	143.863	131.711	-0.0656316
P63321	Rala	Ras-related protein Ral-A OS=Mus musculus OX=10090 GN=Rala PE=1 SV=1	32802.7	34577.9	31251.4	36938.7	41548.4	63221.1	43569.9	37133	0.337229	0.0613198	0.159321	4	-0.547572	0.980202	46.7635	50.5596	46.9611	48.3285	42.224	50.3342	-0.0374524
P63323	Rps12	40S ribosomal protein S12 OS=Mus musculus OX=10090 GN=Rps12 PE=1 SV=2	29750.3	30868.5	19326.6	24741.4	21321.6	24330	19865.1	24681.8	-0.252391	0.342559	0.485806	4	0.620589	0.850895	339.258	323.696	335.05	313.37	314.191	291.371	-0.119677
P63325	Rps10	40S ribosomal protein S10 OS=Mus musculus OX=10090 GN=Rps10 PE=1 SV=1	58465.9	63534.8	49733.9	51990	39550	40044	34434.2	56337.2	-0.470283	0.0662142	0.168254	4	0.674326	0.850895	1.52584	1.62447	2.0142	2.03628	2.55234	1.81567	0.30616
P67778	Phb	Prohibitin OS=Mus musculus OX=10090 GN=Phb PE=1 SV=1	155529	149100	149667	137858	148900	163013	113699	129674	-0.104399	0.545985	0.667272	12	0.407542	0.656548	41.8204	40.6647	32.35	32.1883	36.6873	32.0474	-0.179909
P67984	Rpl22	60S ribosomal protein L22 OS=Mus musculus OX=10090 GN=Rpl22 PE=1 SV=2	81354.6	66663.2	54623.9	52223.1	46847.4	49388.2	44665.7	51710.4	-0.327143	0.069653	0.173614	4	0.84874	1	138.272	127.852	141.208	136.459	137.065	131.672	-0.00650797
P68037	Ube2l3	Ubiquitin-conjugating enzyme E2 L3 OS=Mus musculus OX=10090 GN=Ube2l3 PE=1 SV=1	40285.9	50581.8	32435	34653.5	35368.1	65997.7	41046.5	52512.4	0.313321	0.275121	0.417865	7	-0.254332	0.901467	67.873	69.893	61.0492	69.2772	70.6986	68.8935	0.0734903
P68040	Rack1	Receptor of activated protein C kinase 1 OS=Mus musculus OX=10090 GN=Rack1 PE=1 SV=3	87043.8	89625.1	78962.2	80771.5	57867.4	52173	78580	65734	-0.443097	0.0411019	0.12572	5	0.811488	0.991199	369.201	369.312	344.077	352.942	347.758	363.429	-0.0242623
P68181	Prkacb	cAMP-dependent protein kinase catalytic subunit beta OS=Mus musculus OX=10090 GN=Prkacb PE=1 SV=2	1435.24	660.367	385.69	495.821	531.561	301.335	393.972	491.365	-0.3791	0.146446	0.269131	1	0.645224	0.968827	72.6135	73.6477	79.7771	71.6618	64.1485	83.8148	-0.0490101
P68254	Ywhaq	14-3-3 protein theta OS=Mus musculus OX=10090 GN=Ywhaq PE=1 SV=1	315932	289582	325681	297693	383119	620322	317688	657784	0.668684	0.0392632	0.122129	9	-0.669056	0.969368	63.4364	76.78	74.0069	71.7209	69.2897	67.2982	-0.0360324
P68368	Tuba4a	Tubulin alpha-4A chain OS=Mus musculus OX=10090 GN=Tuba4a PE=1 SV=1	2381.4	1351.96	1425.27	2141.43	3255.26	2575.36	2310.75	2976.04	0.664179	0.0252021	0.100403	1	-0.736692	0.217402	16.0918	15.5852	16.6928	13.3482	9.89345	13.0212	-0.427891
P68369	Tuba1a	Tubulin alpha-1A chain OS=Mus musculus OX=10090 GN=Tuba1a PE=1 SV=1	2.05466e+06	2.20127e+06	1.99002e+06	2.35988e+06	2.49026e+06	2.46396e+06	3.00619e+06	2.81354e+06	0.315723	0.0651896	0.166137	20	-0.805906	0.976381	198.096	302.371	181.785	244.888	213.245	191.007	-0.0421651
P68372	Tubb4b	Tubulin beta-4B chain OS=Mus musculus OX=10090 GN=Tubb4b PE=1 SV=1	1.89919e+06	2.12681e+06	1.82243e+06	2.02818e+06	2.53503e+06	3.04892e+06	3.33091e+06	3.39835e+06	0.699321	0.00363425	0.0375228	27	-0.833057	0.901467	130.351	132.291	118.009	123.334	117.687	115.175	-0.0945546
P68433	Hist1h3a	Histone H3.1 OS=Mus musculus OX=10090 GN=Hist1h3a PE=1 SV=2	1.74304e+06	3.0091e+06	1.06186e+06	2.37549e+06	1.54305e+06	2.00692e+06	3.18339e+06	2.4005e+06	0.109244	0.56827	0.686759	11	-0.0794315
P68510	Ywhah	14-3-3 protein eta OS=Mus musculus OX=10090 GN=Ywhah PE=1 SV=2	109417	88848.4	101764	105569	129530	145227	81099.1	151948	0.404087	0.235608	0.374595	8	-0.580173	0.862985	50.2277	52.5303	49.5594	55.3245	48.0326	59.1664	0.0886402
P70122	Sbds	Ribosome maturation protein SBDS OS=Mus musculus OX=10090 GN=Sbds PE=1 SV=4	29025.9	22092.7	17428.2	22096.1	19329.6	13980.8	23739.1	17764.2	-0.253788	0.249484	0.388966	4	0.582642	0.605997	87.0175	79.0826	85.6148	96.2958	94.7982	87.1025	0.144174
P70168	Kpnb1	Importin subunit beta-1 OS=Mus musculus OX=10090 GN=Kpnb1 PE=1 SV=2	50218.6	42034.4	61778.4	56927.9	68967.6	110116	81805.9	67256.8	0.490383	0.0189234	0.0851798	11	-0.695444	1	199.088	209.749	172.337	196.645	195.003	187.972	0.000767717
P70180	Npr3	Atrial natriuretic peptide receptor 3 OS=Mus musculus OX=10090 GN=Npr3 PE=1 SV=3	16276.4	32353.8	24609.8	30720	36254	39814.1	40621.3	43265.9	0.548554	0.0202155	0.0889176	8	-0.844669	0.688401	881.684	1127.22	692.297	1184.15	1000.84	1155.89	0.331173
P70195	Psmb7	Proteasome subunit beta type-7 OS=Mus musculus OX=10090 GN=Psmb7 PE=1 SV=1	34972.5	21861.4	31164.8	29014.8	43912.5	39677.8	25051.9	48708.1	0.473129	0.143933	0.266207	3	-0.618957	0.80139	91.7985	103.187	84.2482	88.4523	85.4056	85.4295	-0.102115
P70290	Mpp1	55 kDa erythrocyte membrane protein OS=Mus musculus OX=10090 GN=Mpp1 PE=1 SV=1	46080.3	61805.5	54498.3	64233.1	79596.1	77181.4	77407.9	61900.5	0.413393	0.0546889	0.14905	11	-0.740627	0.490089	189.688	188.507	154.537	155.634	154.293	129.221	-0.27751
P70296	Pebp1	Phosphatidylethanolamine-binding protein 1 OS=Mus musculus OX=10090 GN=Pebp1 PE=1 SV=3	195392	113860	168120	205397	135789	98569.6	62287.8	113013	-0.780076	0.0291839	0.106777	6	0.531843	0.97851	52.2738	51.659	45.797	50.3583	46.7473	56.2288	0.0326874
P70302	Stim1	Stromal interaction molecule 1 OS=Mus musculus OX=10090 GN=Stim1 PE=1 SV=2	8254.59	13926	5375.02	7953.83	8725.47	11592.4	9361.6	11010	0.325327	0.36293	0.505797	3	-0.0510129	0.186896	114.853	100.076	96.666	118.328	144.975	119.221	0.293428
P70335	Rock1	Rho-associated protein kinase 1 OS=Mus musculus OX=10090 GN=Rock1 PE=1 SV=1	1455.83	4201.09	2275.82	1239.31	1587.23	814.383	3904.62	1412.54	-0.281715	0.562163	0.682711	3	0.310109	0.965045	68.4605	73.0668	69.384	71.6815	71.8851	74.1072	0.045938
P70336	Rock2	Rho-associated protein kinase 2 OS=Mus musculus OX=10090 GN=Rock2 PE=1 SV=1	33535.8	67240.4	39075	36229	51724.7	43283.4	73026	53542.7	0.484078	0.207137	0.342527	14	-0.245156	0.967805	243.374	235.638	243.317	253.894	258.181	231.413	0.0401665
P70349	Hint1	Histidine triad nucleotide-binding protein 1 OS=Mus musculus OX=10090 GN=Hint1 PE=1 SV=3	66341.3	98372.5	59907.9	66398.5	85420.2	104703	95126.5	106079	0.588507	0.0499689	0.141497	3	-0.541347	0.299495	110.092	98.6234	100.293	85.4962	90.9917	85.0209	-0.23977
P70362	Ufd1	Ubiquitin recognition factor in ER-associated degradation protein 1 OS=Mus musculus OX=10090 GN=Ufd1 PE=1 SV=2	6191.13	10234.4	8253.73	10337.9	10093.3	8469.82	7745.54	16120.7	0.00863111	0.402213	0.544559	3	-0.502633	0.988988	65.989	67.0718	63.5126	65.1781	67.5842	61.248	-0.0197454
P70372	Elavl1	ELAV-like protein 1 OS=Mus musculus OX=10090 GN=Elavl1 PE=1 SV=2	19284.2	17179.3	17179	19958.8	20089.1	29189.6	19146.7	28977.1	0.406619	0.0880352	0.197192	2	-0.663939	0.923459	50.1467	46.7219	45.0884	44.9585	47.4641	44.0117	-0.0565636
P70404	Idh3g	"Isocitrate dehydrogenase [NAD] subunit gamma 1, mitochondrial OS=Mus musculus OX=10090 GN=Idh3g PE=1 SV=1"	58329.4	55125.1	51248.1	61910.6	50150.7	45917.4	41379.1	40818.5	-0.379494	0.0508887	0.142733	6	0.745266	0.634149	154.904	160.482	139.335	136.163	144.134	126.594	-0.159794
P70441	Slc9a3r1	Na(+)/H(+) exchange regulatory cofactor NHE-RF1 OS=Mus musculus OX=10090 GN=Slc9a3r1 PE=1 SV=3	11946.3	4994.19	14221.7	8301.15	5996.44	11078.9	9087.64	25938.5	0.0109176	0.566189	0.684721	3	-0.369981	0.968927	24.7018	22.41	29.4143	23.793	17.7536	30.6078	-0.110907
P70452	Stx4	Syntaxin-4 OS=Mus musculus OX=10090 GN=Stx4 PE=1 SV=1	10315.6	9375.67	8645.49	10571.2	10452.3	18935.3	10483.6	10499.1	0.0932868	0.191492	0.324394	2	-0.38362
P70460	Vasp	Vasodilator-stimulated phosphoprotein OS=Mus musculus OX=10090 GN=Vasp PE=1 SV=4	12163.4	14585.6	14138.2	11567.6	9530.85	14876.4	16941.9	15025.3	0.189137	0.721417	0.805032	5	-0.12574	0.655975	65.9484	58.4216	57.4049	67.07	68.2516	64.0494	0.135567
P70670	Naca	"Nascent polypeptide-associated complex subunit alpha, muscle-specific form OS=Mus musculus OX=10090 GN=Naca PE=1 SV=2"	82711.1	49897.2	62007.2	65780	42882.9	33176	33936	27832.4	-0.928563	0.00220322	0.0314239	5	0.813488	0.85589	158.105	155.607	143.84	140.933	147.199	143.909	-0.0817765
P80313	Cct7	T-complex protein 1 subunit eta OS=Mus musculus OX=10090 GN=Cct7 PE=1 SV=1	69938.3	80362.3	66557	62614.9	55512.3	66738.4	78101.5	52644.9	-0.164675	0.420664	0.562631	11	0.581896	0.970977	118.135	126.981	105.068	118.013	123.05	117.568	0.03844
P80314	Cct2	T-complex protein 1 subunit beta OS=Mus musculus OX=10090 GN=Cct2 PE=1 SV=4	92371.5	96220.5	102393	98092.5	141302	188995	138626	173468	0.68841	0.00210185	0.0309485	16	-0.850874	0.948721	136.955	150.338	124.167	131.591	135.236	130.524	-0.046113
P80315	Cct4	T-complex protein 1 subunit delta OS=Mus musculus OX=10090 GN=Cct4 PE=1 SV=3	110416	126625	107242	102853	109674	140219	131026	124692	0.232202	0.292354	0.433404	16	-0.350009	0.935937	133.612	135.071	116.136	124.595	123.891	122.509	-0.0494602
P80316	Cct5	T-complex protein 1 subunit epsilon OS=Mus musculus OX=10090 GN=Cct5 PE=1 SV=1	48189.4	55202.6	57562.7	56363.8	53658.7	73927.5	66581.9	57997.5	0.155809	0.245052	0.38467	8	-0.552968	0.880822	156.91	158.926	135.657	143.12	141.984	141.905	-0.0767938
P80317	Cct6a	T-complex protein 1 subunit zeta OS=Mus musculus OX=10090 GN=Cct6a PE=1 SV=3	66467.5	69948.8	67328	79571.2	69183.9	101635	88551.6	85362.1	0.341304	0.14706	0.269974	10	-0.647675	0.867084	132.964	138.908	117.688	122.782	123.52	120.914	-0.0817726
P80318	Cct3	T-complex protein 1 subunit gamma OS=Mus musculus OX=10090 GN=Cct3 PE=1 SV=1	74210.4	91967.4	70585.9	66892.4	69356.8	93181.6	88951.5	77899.7	0.201818	0.520142	0.65033	15	-0.0453197	0.927188	99.1727	107.336	85.3786	94.4236	92.1287	92.2579	-0.0598028
P82347	Sgcd	Delta-sarcoglycan OS=Mus musculus OX=10090 GN=Sgcd PE=1 SV=1	29689.8	32563.4	41176.8	39165.7	49674	93711.5	46082.9	77404.3	0.796031	0.0107223	0.060773	6	-0.739593
P82349	Sgcb	Beta-sarcoglycan OS=Mus musculus OX=10090 GN=Sgcb PE=1 SV=1	2335.28	4152.5	7136.15	5826.71	9134.77	18777.9	9141.02	17934.9	1.3802	0.00467384	0.0419677	2	-0.815432	0.970977	32.6432	35.7484	31.962	35.9721	32.6089	34.7709	0.0430033
P83882	Rpl36a	60S ribosomal protein L36a OS=Mus musculus OX=10090 GN=Rpl36a PE=3 SV=2	7791.46	9188.47	5650.64	5218.67	4099.21	3159.97	5939.56	6803.63	-0.427304	0.125785	0.245478	2	0.664948	0.918773	80.6157	76.9045	83.3709	79.7811	75.6916	75.6441	-0.0594217
P83940	Eloc	Elongin-C OS=Mus musculus OX=10090 GN=Eloc PE=1 SV=1	15468	18315.9	18140.4	18344.3	20445.4	9073.57	18164.4	16004.9	-0.0963372	0.458329	0.595175	3	0.143469	0.754315	44.9402	45.747	44.1435	42.1798	40.4691	42.8055	-0.104239
P84089	Erh	Enhancer of rudimentary homolog OS=Mus musculus OX=10090 GN=Erh PE=1 SV=1	18102.9	16381.6	14551.1	11378.2	11321.4	17481.5	7043.62	10219.7	-0.521403	0.157538	0.283994	2	0.644652	0.861811	4.42283	4.44565	4.05571	4.14494	3.29387	4.01398	-0.180383
P84091	Ap2m1	AP-2 complex subunit mu OS=Mus musculus OX=10090 GN=Ap2m1 PE=1 SV=1	15231.2	10860.7	8711.22	11530.5	11648.8	16411.1	15294.5	15744.6	0.471648	0.121472	0.240245	4	-0.425524	0.991671	63.6187	70.7228	64.2212	69.7108	64.5934	68.4849	0.0312935
P84099	Rpl19	60S ribosomal protein L19 OS=Mus musculus OX=10090 GN=Rpl19 PE=1 SV=1	69975.5	99842	54452.5	54218.9	66101.8	55926	64031	95409.1	0.0758055	0.90224	0.934685	5	0.124532	0.960904	121.336	121.898	121.502	117.402	114.968	122.528	-0.03995
P84104	Srsf3	Serine/arginine-rich splicing factor 3 OS=Mus musculus OX=10090 GN=Srsf3 PE=1 SV=1	14229.2	25034.5	13691.2	22243.4	19510.8	16792.2	23196.4	27933.9	0.257969	0.38378	0.527013	5	-0.369371	0.905037	87.139	74.1248	93.7134	79.1111	87.5313	70.7222	-0.101896
P85094	Isoc2a	Isochorismatase domain-containing protein 2A OS=Mus musculus OX=10090 GN=Isoc2a PE=1 SV=1	34632.9	30996.9	35309.6	31155.9	18087.6	16658.8	23021	12673.4	-0.920177	0.0014549	0.0274059	4	0.895171	0.132779	95.7084	98.4782	80.5195	71.1691	82.6372	66.773	-0.316828
P97300	Nptn	Neuroplastin OS=Mus musculus OX=10090 GN=Nptn PE=1 SV=3	2066.44	1603.63	3520.79	3554.53	4383.59	6356.87	3076.14	3372.82	0.511512	0.0688443	0.172659	1	-0.663668	0.962434	127.454	135.403	124.842	132.656	116.599	152.663	0.0440854
P97351	Rps3a	40S ribosomal protein S3a OS=Mus musculus OX=10090 GN=Rps3a PE=1 SV=3	255892	340676	178069	285938	269634	352756	349078	473509	0.375492	0.107136	0.223966	22	-0.532352
P97371	Psme1	Proteasome activator complex subunit 1 OS=Mus musculus OX=10090 GN=Psme1 PE=1 SV=2	34105.7	36551.3	39216.2	43703	26343.3	26160.1	29976	32489.3	-0.430062	0.0299463	0.1078	7	0.566574	0.936727	84.9916	86.1148	83.2865	90.2456	88.7672	85.5657	0.0564169
P97372	Psme2	Proteasome activator complex subunit 2 OS=Mus musculus OX=10090 GN=Psme2 PE=1 SV=4	8435.01	6628.03	8114.04	8348.94	7356.1	7872.37	7597.63	7210.19	-0.138761	0.68376	0.775495	2	0.17095	0.925691	92.5481	90.3466	83.4552	92.177	94.0814	89.8261	0.0529251
P97384	Anxa11	Annexin A11 OS=Mus musculus OX=10090 GN=Anxa11 PE=1 SV=2	2950.25	1029.91	1021.57	296.878	307.656	1054.14	2251.71	493.285	-0.508373	0.6764	0.769966	2	0.435115	0.578668	24.8233	24.6711	23.1548	28.6016	26.4295	26.5224	0.166543
P97429	Anxa4	Annexin A4 OS=Mus musculus OX=10090 GN=Anxa4 PE=1 SV=4	11679.4	24466.6	10515.2	11134.5	12499.1	33727.1	30368.6	19370	1.0887	0.0969043	0.209919	5	-0.336257	0.973702	71.0536	70.9509	71.5942	69.6713	61.6273	76.1693	-0.0474096
P97447	Fhl1	Four and a half LIM domains protein 1 OS=Mus musculus OX=10090 GN=Fhl1 PE=1 SV=3	68409.3	127492	90861.2	119403	57835	46527.3	97341.5	88001.9	-0.545977	0.12762	0.248221	10	0.399943	0.312482	170.22	202.821	172.809	234.266	199.23	227.386	0.27698
P97449	Anpep	Aminopeptidase N OS=Mus musculus OX=10090 GN=Anpep PE=1 SV=4	608.314	548.548	1310.14	368.549	62.0224	117.263	1199.48	60.271	-2.75991	0.0526926	0.1459	2	0.384203	0.762354	28.6522	34.3585	30.4941	37.4501	32.9796	35.5491	0.182838
P97461	Rps5	40S ribosomal protein S5 OS=Mus musculus OX=10090 GN=Rps5 PE=1 SV=3	28637.2	28956.9	20841.6	21405.5	18477.7	20484.7	24386.7	28126.5	-0.147612	0.549448	0.671031	7	0.43568	0.974877	259.095	244.786	251.264	246.445	241.62	248.552	-0.0355485
P97468	Cmklr1	Chemokine-like receptor 1 OS=Mus musculus OX=10090 GN=Cmklr1 PE=1 SV=1	1646.08	4444.79	9059.6	4718.57	17037.5	86591.9	29929.2	76728.3	3.38735	0.000663093	0.0208935	2	-0.720303	0.00258483	96.7619	97.3166	67.8993	149.584	136.175	146.496	0.740849
P97807	Fh	"Fumarate hydratase, mitochondrial OS=Mus musculus OX=10090 GN=Fh PE=1 SV=3"	212965	186186	177301	192587	182740	207396	155195	163418	-0.131948	0.463809	0.59939	9	0.49304
P97821	Ctsc	Dipeptidyl peptidase 1 OS=Mus musculus OX=10090 GN=Ctsc PE=1 SV=1	11931.9	6458.36	11769.4	14184.8	13210.7	12085.2	6794.16	12102.1	0.0293184	0.981665	0.989085	1	-0.240986	0.0663416	243.05	265.364	218.161	173.942	156.271	167.098	-0.543756
P97855	G3bp1	Ras GTPase-activating protein-binding protein 1 OS=Mus musculus OX=10090 GN=G3bp1 PE=1 SV=1	9368.45	12370.4	9009.22	12374.9	10922.6	11243.8	11310.7	12866.5	0.067019	0.520561	0.65033	2	-0.393328	0.922054	86.8757	84.3516	83.4552	82.7175	81.1789	80.8189	-0.0574602
P97872	Fmo5	Dimethylaniline monooxygenase [N-oxide-forming] 5 OS=Mus musculus OX=10090 GN=Fmo5 PE=1 SV=4	21201.2	22560.1	25696	18574.8	22650.3	27222.4	26601.3	23710.7	0.199557	0.275715	0.418035	7	-0.398454	0.40995	34.1626	31.6618	38.8963	43.382	38.7141	43.7393	0.26803
P97927	Lama4	Laminin subunit alpha-4 OS=Mus musculus OX=10090 GN=Lama4 PE=1 SV=2	303302	329423	400756	381967	656347	714949	436834	588109	0.808577	0.00536693	0.0448185	36	-0.83573	0.688401	238.107	296.646	209.725	295.87	308.358	290.787	0.280229
P99024	Tubb5	Tubulin beta-5 chain OS=Mus musculus OX=10090 GN=Tubb5 PE=1 SV=1	175190	214959	147846	167887	185562	272255	262334	309547	0.639976	0.0325269	0.112051	2	-0.634083	0.767117	223.318	236.364	171.004	202.596	175.254	187.447	-0.146533
P99026	Psmb4	Proteasome subunit beta type-4 OS=Mus musculus OX=10090 GN=Psmb4 PE=1 SV=1	19750.6	15396.3	21431	30274.9	23069.1	15730.9	13927.6	15470.4	-0.399238	0.220708	0.357709	3	0.15019	0.933997	105.838	105.137	88.8036	94.3842	98.4317	94.1449	-0.0586833
P99027	Rplp2	60S acidic ribosomal protein P2 OS=Mus musculus OX=10090 GN=Rplp2 PE=1 SV=3	35795.7	24784.4	25576.7	29755.4	27736.5	31505.1	18682.6	22206.5	-0.152608	0.332157	0.472989	4	0.429695	0.980326	340.109	293.016	276.049	300.856	342.32	290.923	0.0410534
P99028	Uqcrh	"Cytochrome b-c1 complex subunit 6, mitochondrial OS=Mus musculus OX=10090 GN=Uqcrh PE=1 SV=2"	15776.3	17025	13677.1	13579.5	18281.4	20638.8	9376.28	14505.7	0.148739	0.969248	0.982285	2	0.0200452	0.342848	178.202	172.472	148.227	133.109	146.977	135.251	-0.26128
P99029	Prdx5	"Peroxiredoxin-5, mitochondrial OS=Mus musculus OX=10090 GN=Prdx5 PE=1 SV=2"	432737	408642	387306	434445	440255	409662	432735	357545	0.00179492	0.879795	0.919039	10	0.200585	0.81352	206.564	225.079	184.367	218.539	205.805	250.498	0.131457
Q00519	Xdh	Xanthine dehydrogenase/oxidase OS=Mus musculus OX=10090 GN=Xdh PE=1 SV=5	410148	217269	389249	433821	327840	260406	226434	357892	-0.451542	0.322382	0.463273	28	0.169152	0.987352	301.496	298.596	291.605	289.663	319.308	264.952	-0.0330981
Q00612	G6pdx	Glucose-6-phosphate 1-dehydrogenase X OS=Mus musculus OX=10090 GN=G6pdx PE=1 SV=3	836829	744620	714126	583646	748111	910022	945753	949759	0.347341	0.112872	0.229459	27	-0.454171	0.967805	213.29	249.225	173.906	227.546	231.981	216.978	0.103047
Q00623	Apoa1	Apolipoprotein A-I OS=Mus musculus OX=10090 GN=Apoa1 PE=1 SV=2	653153	428996	643887	740006	1.44095e+06	1.71151e+06	667988	1.44475e+06	1.15374	0.0107308	0.060773	21	-0.776229	0.841167	4.84826	21.6009	14.5501	4.99235	4.85107	17.9626	-0.602832
Q00724	Rbp4	Retinol-binding protein 4 OS=Mus musculus OX=10090 GN=Rbp4 PE=1 SV=2	1769.67	2658.5	388.009	1073.79	1794.13	703.397	1165.96	545.712	-0.606133	0.610289	0.720948	1	0.530704	0.93158	423.068	514.79	308.73	390.603	412.715	346.115	-0.0897065
Q00897	Serpina1d	Alpha-1-antitrypsin 1-4 OS=Mus musculus OX=10090 GN=Serpina1d PE=1 SV=1	4836.91	4821.6	7029.83	9037.62	11009.2	9017.21	6845.27	10899.8	0.765671	0.057227	0.153531	1	-0.862235	0.860175	1.54609	5.62806	2.94216	1.32682	1.98384	4.15016	-0.40957
Q00898	Serpina1e	Alpha-1-antitrypsin 1-5 OS=Mus musculus OX=10090 GN=Serpina1e PE=1 SV=1	53997.4	27227.4	32000.9	49768.8	69390.7	36518.7	22324	30841	-0.249934	0.784006	0.850239	4	-0.00306193	0.827224	3.40989	20.626	10.5514	4.47997	4.13427	13.78	-0.513288
Q00PI9	Hnrnpul2	Heterogeneous nuclear ribonucleoprotein U-like protein 2 OS=Mus musculus OX=10090 GN=Hnrnpul2 PE=1 SV=2	5987.97	8256.41	6516.73	8468.58	6700.88	8392.82	10893.4	11134.2	0.38244	0.173195	0.303485	5	-0.595677	0.941751	161.266	164.672	157.118	156.876	152.538	159.063	-0.044164
Q01405	Sec23a	Protein transport protein Sec23A OS=Mus musculus OX=10090 GN=Sec23a PE=1 SV=2	19075.8	20312.3	24070.3	17114.1	21853.5	22367.5	26629.8	26295	0.30105	0.142934	0.266207	5	-0.598602	0.638995	45.2036	56.6376	44.8353	57.2164	50.5538	57.3377	0.176968
Q01730	Rsu1	Ras suppressor protein 1 OS=Mus musculus OX=10090 GN=Rsu1 PE=1 SV=3	17792	12861.9	11987.6	14869	5635.52	5130.03	4543.4	7669.94	-1.36288	0.000202735	0.0156936	5	0.85489	0.583036	79.0153	82.2772	79.4566	95.9016	86.9381	93.678	0.198821
Q01768	Nme2	Nucleoside diphosphate kinase B OS=Mus musculus OX=10090 GN=Nme2 PE=1 SV=1	230064	139631	209946	244338	270678	202152	136988	218572	-0.0642517	0.993874	0.996802	6	-0.199093
Q01853	Vcp	Transitional endoplasmic reticulum ATPase OS=Mus musculus OX=10090 GN=Vcp PE=1 SV=4	1.10108e+06	1.01107e+06	1.05361e+06	927596	1.18733e+06	1.73538e+06	1.19375e+06	1.54643e+06	0.396609	0.0355381	0.116842	41	-0.65116	0.96566	206.746	219.229	173.72	204.409	202.666	214.43	0.0580003
Q02013	Aqp1	Aquaporin-1 OS=Mus musculus OX=10090 GN=Aqp1 PE=1 SV=3	1783.7	4461.54	1309	1752.53	669.95	56.1147	2194.41	180.191	-2.34729	0.0340308	0.115019	1	0.708048	0.952208	695.284	581.502	785.346	669.578	658.185	616.235	-0.0751635
Q02053	Uba1	Ubiquitin-like modifier-activating enzyme 1 OS=Mus musculus OX=10090 GN=Uba1 PE=1 SV=1	511910	462847	392338	386566	372820	516722	521936	473417	0.214934	0.592734	0.709713	27	0.00363412	0.96566	190.479	207.799	169.114	196.467	190.925	198.224	0.0505376
Q02248	Ctnnb1	Catenin beta-1 OS=Mus musculus OX=10090 GN=Ctnnb1 PE=1 SV=1	9903.54	6108.57	4425.26	4516.32	5599.66	14069.7	9355.08	12816.6	1.05985	0.0729141	0.178223	5	-0.425595	0.982226	411.136	430.113	420.287	435.949	393.732	405.314	-0.0317645
Q02257	Jup	Junction plakoglobin OS=Mus musculus OX=10090 GN=Jup PE=1 SV=3	18701	6636.03	17269.3	11275.2	23281.3	38865	17250	21278.1	0.673588	0.0350729	0.116291	5	-0.566509	0.192751	210.899	163.801	168.591	230.856	254.622	227.289	0.399284
Q02357	Ank1	Ankyrin-1 OS=Mus musculus OX=10090 GN=Ank1 PE=1 SV=2	11975.6	19455.6	17063.8	14526.2	15891.4	30591.9	20074.1	12464.7	0.181994	0.386563	0.528717	8	-0.225258
Q02780	Nfia	Nuclear factor 1 A-type OS=Mus musculus OX=10090 GN=Nfia PE=1 SV=1	2359.9	2261.37	2218.31	2188.19	1651.8	430.759	2591.82	994.506	-0.805282	0.0808343	0.190133	2	0.594319	0.826119	85.8627	79.7257	90.5921	78.1257	79.9677	69.1658	-0.173729
Q03265	Atp5f1a	"ATP synthase subunit alpha, mitochondrial OS=Mus musculus OX=10090 GN=Atp5f1a PE=1 SV=1"	3.55054e+06	3.21958e+06	3.18072e+06	2.91089e+06	3.59968e+06	4.72569e+06	2.396e+06	3.37962e+06	0.124253	0.676664	0.769966	39	-0.130408
Q04447	Ckb	Creatine kinase B-type OS=Mus musculus OX=10090 GN=Ckb PE=1 SV=1	67424.6	68154.5	82659.1	102760	77491.7	66943.2	81772.1	82081.1	0.0848333	0.831695	0.885337	7	-0.244144	0.997854	86.3287	73.0876	105.777	76.49	58.7106	122.918	-0.0913019
Q04857	Col6a1	Collagen alpha-1(VI) chain OS=Mus musculus OX=10090 GN=Col6a1 PE=1 SV=1	926.606	6432.94	3853.24	2211.21	1573.94	15372.2	6111.52	6026.2	1.05594	0.211985	0.348994	1	-0.343987	0.0429128	350.056	457.847	397.78	564.204	519.124	588.299	0.47814
Q05421	Cyp2e1	Cytochrome P450 2E1 OS=Mus musculus OX=10090 GN=Cyp2e1 PE=1 SV=1	385574	367244	389809	333390	260023	119528	126283	66308.5	-1.61487	0.00253015	0.0329256	17	0.872166	0.686256	2460.87	2263.14	2209.75	1507.67	2265.72	1261.63	-0.504602
Q05793	Hspg2	Basement membrane-specific heparan sulfate proteoglycan core protein OS=Mus musculus OX=10090 GN=Hspg2 PE=1 SV=1	148226	230677	224391	186185	326793	388756	277566	262170	0.559225	0.01152	0.0641936	43	-0.715239	0.000470196	514.455	507.011	419.916	748.308	814.474	750.605	0.687464
Q05816	Fabp5	Fatty acid-binding protein 5 OS=Mus musculus OX=10090 GN=Fabp5 PE=1 SV=3	217275	164715	213416	259544	566679	546557	306091	445137	1.19572	0.00161884	0.0286013	13	-0.831316	0.910395	100.611	141.232	82.426	120.023	145.296	104.553	0.21284
Q05920	Pc	"Pyruvate carboxylase, mitochondrial OS=Mus musculus OX=10090 GN=Pc PE=1 SV=1"	1.38093e+07	6.43518e+06	8.66208e+06	4.8782e+06	5.31976e+06	8.15764e+06	4.34607e+06	4.30661e+06	-0.634811	0.15022	0.273457	65	0.657833
Q06185	Atp5me	"ATP synthase subunit e, mitochondrial OS=Mus musculus OX=10090 GN=Atp5me PE=1 SV=2"	77185.3	83835.5	73521.9	64635.8	73851.8	265165	48440.5	74534.2	-0.0219833	0.53755	0.663043	5	-0.208156
Q06890	Clu	Clusterin OS=Mus musculus OX=10090 GN=Clu PE=1 SV=1	12089.6	10537	13619.5	10487.2	17692.7	12126.2	10247.1	12154.7	0.105205	0.520433	0.65033	4	-0.29275	0.581572	129.034	117.832	112.121	157.526	118.453	175.113	0.312883
Q07076	Anxa7	Annexin A7 OS=Mus musculus OX=10090 GN=Anxa7 PE=1 SV=2	8826.12	13548	4593.69	4893.64	7330.59	11917.9	19985.1	12199.3	0.875548	0.109178	0.225513	5	-0.259042	0.716615	129.804	136.502	118.262	142.233	139.24	143.831	0.147655
Q07417	Acads	"Short-chain specific acyl-CoA dehydrogenase, mitochondrial OS=Mus musculus OX=10090 GN=Acads PE=1 SV=2"	362733	240374	328675	278480	306961	267418	234500	272722	-0.163855	0.435887	0.577076	15	0.373239	0.771804	109.464	115.696	85.0074	111.391	122.902	111.089	0.166138
Q08481	Pecam1	Platelet endothelial cell adhesion molecule OS=Mus musculus OX=10090 GN=Pecam1 PE=1 SV=1	11.829	93.9472	326.73	1136.69	147.588	1624.49	2447.81	388.405	2.18073	0.143762	0.266207	1	-0.471249	0.332329	298.295	266.65	302.217	389.834	389.333	338.956	0.365895
Q08857	Cd36	Platelet glycoprotein 4 OS=Mus musculus OX=10090 GN=Cd36 PE=1 SV=2	535961	1.52695e+06	500236	1.14917e+06	808426	986945	1.7702e+06	619470	0.186721	0.630991	0.737362	12	-0.0365262	0.993512	3199.4	3866.65	2899.91	3519.63	3639.72	3295.18	0.0782387
Q08879	Fbln1	Fibulin-1 OS=Mus musculus OX=10090 GN=Fbln1 PE=1 SV=2	6851.44	6161.94	6054.02	4718.27	4192.21	7220.06	5894.64	5883.03	-0.0526573	0.81951	0.876133	2	0.300308	0.929217	47.6954	50.5388	47.6023	55.6201	48.873	52.9411	0.10892
Q11011	Npepps	Puromycin-sensitive aminopeptidase OS=Mus musculus OX=10090 GN=Npepps PE=1 SV=2	22245.9	24201.2	24634.1	21606.2	22778.4	23985.4	32505.1	22513.8	0.0106056	0.507308	0.63902	7	-0.213839	0.914817	84.2623	81.4474	74.7324	77.0024	76.8039	75.8191	-0.0646151
Q11136	Pepd	Xaa-Pro dipeptidase OS=Mus musculus OX=10090 GN=Pepd PE=1 SV=3	28786.2	17767.9	30729.4	28385.3	19310.1	10006.3	14981.6	19621.6	-0.74899	0.0260835	0.101579	7	0.540183	0.698173	61.5928	68.7728	49.9644	52.5261	51.3448	56.6763	-0.156501
Q14DH7	Acss3	"Acyl-CoA synthetase short-chain family member 3, mitochondrial OS=Mus musculus OX=10090 GN=Acss3 PE=1 SV=2"	8575.36	7614.82	10707.8	6629.61	6512.6	6121.74	8867.8	4384.47	-0.355917	0.151578	0.275063	4	0.572698	0.96566	134.686	121.836	124.943	122.467	131.603	106.596	-0.0850296
Q2TPA8	Hsdl2	Hydroxysteroid dehydrogenase-like protein 2 OS=Mus musculus OX=10090 GN=Hsdl2 PE=1 SV=1	128307	121850	121538	94259.3	106562	101217	103488	111189	-0.212674	0.428693	0.569728	10	0.689508	0.294744	119.006	128.329	98.2182	138.39	145.321	150.756	0.338421
Q2VLH6	Cd163	Scavenger receptor cysteine-rich type 1 protein M130 OS=Mus musculus OX=10090 GN=Cd163 PE=1 SV=2	2628.56	1707.97	2192.88	4158.15	2022.51	3052.18	2378.2	3174.82	0.166304	0.876544	0.916725	3	-0.271219	1	50.7139	57.6955	42.1358	49.2547	42.8914	56.3261	-0.0170443
Q31125	Slc39a7	Zinc transporter SLC39A7 OS=Mus musculus OX=10090 GN=Slc39a7 PE=1 SV=2	4177.81	4844.54	6031.22	5714.36	7556.05	11880.4	10593.8	9909.91	0.961533	0.00140945	0.0273183	2	-0.85426	0.873803	3.3086	3.09729	2.90841	3.45519	3.07141	3.87781	0.155149
Q3TC72	Fahd2	Fumarylacetoacetate hydrolase domain-containing protein 2A OS=Mus musculus OX=10090 GN=Fahd2 PE=1 SV=1	4613.7	3703.17	3770.34	3741.46	4460.61	5670.73	4506.55	4666.4	0.288017	0.11436	0.231525	2	-0.519351
Q3TDN2	Faf2	FAS-associated factor 2 OS=Mus musculus OX=10090 GN=Faf2 PE=1 SV=2	8433.6	12246.6	11995	11397.9	12809.9	13740.4	14367.6	18042.8	0.265023	0.0559891	0.150968	2	-0.793061	0.963532	47.8777	53.6297	48.4459	53.9647	47.0192	53.2135	0.0394327
Q3TDQ1	Stt3b	Dolichyl-diphosphooligosaccharide--protein glycosyltransferase subunit STT3B OS=Mus musculus OX=10090 GN=Stt3b PE=1 SV=2	53125	38063.6	30110.7	23574.5	23340.8	37775.1	34018.4	38783.2	0.0825304	0.79655	0.85824	8	0.424177	0.877638	216.288	248.54	198.505	209.73	214.777	197.096	-0.0884452
Q3TEA8	Hp1bp3	Heterochromatin protein 1-binding protein 3 OS=Mus musculus OX=10090 GN=Hp1bp3 PE=1 SV=1	15965.2	39475.7	14708.1	18594.8	14892.2	32867.3	40332.8	35214	0.981488	0.248599	0.388628	8	-0.24311	0.912031	141.311	129.387	133.767	135.316	144.925	140.679	0.057921
Q3TGW2	Eepd1	Endonuclease/exonuclease/phosphatase family domain-containing protein 1 OS=Mus musculus OX=10090 GN=Eepd1 PE=1 SV=1	10222.8	12753.6	17832.7	11026.8	17874.7	21165.7	17472.5	18083.7	0.600346	0.025799	0.101579	4	-0.745439	1	263.309	244.869	247.299	269.01	231.091	248.066	-0.0160593
Q3THE2	Myl12b	Myosin regulatory light chain 12B OS=Mus musculus OX=10090 GN=Myl12b PE=1 SV=2	78089.8	54393.4	48228.3	68675	32034.4	19149.1	37237.7	24066	-1.1383	0.00163173	0.0286013	5	0.829135	0.661838	10.5409	8.98859	12.3061	10.2739	8.21266	8.35225	-0.242135
Q3THG9	Aarsd1	Alanyl-tRNA editing protein Aarsd1 OS=Mus musculus OX=10090 GN=Aarsd1 PE=1 SV=2	3958.66	1371.54	1534.34	1026.23	1094.41	933.096	434.409	2492.26	-0.52158	0.231458	0.369906	1	0.442058
Q3THK7	Gmps	GMP synthase [glutamine-hydrolyzing] OS=Mus musculus OX=10090 GN=Gmps PE=1 SV=2	246.816	1260.86	1791.19	976.975	1654.46	2442.9	801.668	2203.22	0.782587	0.169499	0.299127	1	-0.593969	0.913651	33.7169	36.267	33.0249	32.8977	31.4472	30.0241	-0.126213
Q3THS6	Mat2a	S-adenosylmethionine synthase isoform type-2 OS=Mus musculus OX=10090 GN=Mat2a PE=1 SV=2	30098.6	22693.5	23771.8	25478.1	34271.2	26661.3	24585.8	36375.8	0.296617	0.232001	0.370219	5	-0.526416	0.57147	178.607	146.563	207.835	191.915	228.001	208.73	0.249132
Q3TW96	Uap1l1	UDP-N-acetylhexosamine pyrophosphorylase-like protein 1 OS=Mus musculus OX=10090 GN=Uap1l1 PE=1 SV=1	928.136	493.022	2132.84	1958.28	1324.27	6550.5	2122.53	10095.9	1.4677	0.0486022	0.140146	3	-0.661903	1	16.4767	15.4815	14.3645	13.9591	14.4662	17.3011	-0.0229057
Q3TWW8	Srsf6	Serine/arginine-rich splicing factor 6 OS=Mus musculus OX=10090 GN=Srsf6 PE=1 SV=1	6170.02	4756.8	4890.42	5393.45	5581.45	7668.13	5855.77	9421.53	0.383783	0.0905797	0.199968	2	-0.617294	0.943433	147.875	135.299	172.826	140.223	159.731	131.361	-0.0776469
Q3TXS7	Psmd1	26S proteasome non-ATPase regulatory subunit 1 OS=Mus musculus OX=10090 GN=Psmd1 PE=1 SV=1	19342.5	19261.1	21173.8	19367.6	19323.4	21081.2	17850.3	20370.4	0.0357023	0.939539	0.961738	6	-0.05669	0.992257	99.4968	113.186	89.1748	101.558	102.016	102.335	0.0260894
Q3TZ89	Sec31b	Protein transport protein Sec31B OS=Mus musculus OX=10090 GN=Sec31b PE=1 SV=2	14741.4	8099.44	8551.56	4485.9	25336.5	24551.7	21018.3	2008.32	1.44866	0.457811	0.595175	1	-0.297564	0.903769	10.6625	9.92207	11.0407	11.1607	12.3158	10.8424	0.117175
Q3TZZ7	Esyt2	Extended synaptotagmin-2 OS=Mus musculus OX=10090 GN=Esyt2 PE=1 SV=1	811.304	4771.42	552.584	1056.83	683.319	85.1716	3738.02	3450.7	0.729732	0.752172	0.827028	1	0.0498252	1	112.726	120.031	104.14	114.308	109.48	112.198	-0.00170078
Q3U0S6	Rasip1	Ras-interacting protein 1 OS=Mus musculus OX=10090 GN=Rasip1 PE=1 SV=3	536.897	5235.15	2224.91	3177.33	3508.05	3716.67	4892.74	5212.14	0.681546	0.134854	0.255972	2	-0.499269	0.475385	47.1686	35.5824	45.0884	50.9889	62.1711	45.6263	0.311516
Q3U0V1	Khsrp	Far upstream element-binding protein 2 OS=Mus musculus OX=10090 GN=Khsrp PE=1 SV=2	23262.9	21078.1	28529.4	23179.7	29829.9	36215.5	26807.7	38145.9	0.501237	0.0402945	0.124475	10	-0.792828	0.785072	48.7893	45.581	46.59	49.9444	51.0976	49.0308	0.0907503
Q3U5Q7	Cmpk2	"UMP-CMP kinase 2, mitochondrial OS=Mus musculus OX=10090 GN=Cmpk2 PE=1 SV=2"	1939.42	1439.69	2990.22	1172.41	3640.99	3611.47	3844.93	2479.32	1.11777	0.0151746	0.0753514	2	-0.646641	0.819908	12.8302	12.4528	13.8415	14.8854	16.2953	13.955	0.204708
Q3U7R1	Esyt1	Extended synaptotagmin-1 OS=Mus musculus OX=10090 GN=Esyt1 PE=1 SV=2	90798.7	254095	84623.3	142433	117034	160022	317340	187611	0.607492	0.262084	0.403367	25	-0.211752	0.568956	316.974	327.617	270.599	358.441	345.261	330.707	0.180816
Q3U9G9	Lbr	Delta(14)-sterol reductase OS=Mus musculus OX=10090 GN=Lbr PE=1 SV=2	6433.58	7759.41	3310.51	5935.46	4002.55	3715.88	13704.3	8251.84	-0.104672	0.679753	0.772467	4	-0.136999	0.936727	39.1057	32.8235	37.9515	37.4501	40.3949	37.4751	0.0729371
Q3UBX0	Tmem109	Transmembrane protein 109 OS=Mus musculus OX=10090 GN=Tmem109 PE=1 SV=2	61152.9	62360.6	55877.2	55271.4	55679.7	58128.1	42934.9	46624.2	-0.198224	0.220859	0.357709	5	0.71939	0.991671	128.203	132.353	115.428	121.422	125.572	134.765	0.0230588
Q3UGC7	Eif3j1	Eukaryotic translation initiation factor 3 subunit J-A OS=Mus musculus OX=10090 GN=Eif3j1 PE=2 SV=1	17645.5	10922.7	11679.1	12134.2	9417.86	2644.76	4611.4	4399.28	-1.40219	0.00374772	0.0381572	3	0.821736	0.913882	19.313	20.3771	18.6837	18.1568	18.1986	15.7837	-0.165176
Q3UGR5	Hdhd2	Haloacid dehalogenase-like hydrolase domain-containing protein 2 OS=Mus musculus OX=10090 GN=Hdhd2 PE=1 SV=2	1348.48	1256.02	1410.25	1016.18	873.935	610.993	1122.01	1283.83	-0.394256	0.137563	0.259942	1	0.536148	0.80139	39.4703	44.7305	35.5726	36.2085	38.6152	34.9655	-0.120454
Q3UHJ0	Aak1	AP2-associated protein kinase 1 OS=Mus musculus OX=10090 GN=Aak1 PE=1 SV=2	1601.68	2771.84	1038.39	1271.65	791.713	1026.61	2180.61	1153.36	-0.391278	0.353642	0.495788	2	0.504051	1	54.8872	51.659	53.6593	53.5903	55.4726	51.2291	0.000464346
Q3UHK6	Tenm4	Teneurin-4 OS=Mus musculus OX=10090 GN=Tenm4 PE=1 SV=2	1990.92	3468.99	3154.51	2263.53	2359.25	9442.74	5708.24	9787.58	1.45813	0.0304798	0.108686	3	-0.647634	0.921664	187.683	234.995	169.384	225.792	202.616	244.058	0.193248
Q3UHX2	Pdap1	28 kDa heat- and acid-stable phosphoprotein OS=Mus musculus OX=10090 GN=Pdap1 PE=1 SV=1	3229.16	7144.25	2925.4	4437.9	7416.26	7838	6974.69	5466.45	0.925892	0.0369109	0.118073	3	-0.498245	0.97851	61.3092	60.413	53.4737	58.5762	56.2389	56.6568	-0.0285535
Q3UIU2	Ndufb6	NADH dehydrogenase [ubiquinone] 1 beta subcomplex subunit 6 OS=Mus musculus OX=10090 GN=Ndufb6 PE=1 SV=3	69.1441	341.494	646.444	10.0253	949.341	11319.5	1784.65	6444.32	4.46399	0.00521736	0.0445365	1	-0.581131	0.0669415	52.1928	56.8865	46.6068	41.8251	43.3363	41.969	-0.287737
Q3UJD6	Usp19	Ubiquitin carboxyl-terminal hydrolase 19 OS=Mus musculus OX=10090 GN=Usp19 PE=1 SV=1	819.185	1724.1	1096.12	863.669	2819.79	4711.2	3100.36	3034.16	1.65639	0.000302458	0.0156936	2	-0.748571	0.767929	130.776	124.201	123.762	132.537	152.786	127.081	0.118768
Q3UJU9	Rmdn3	Regulator of microtubule dynamics protein 3 OS=Mus musculus OX=10090 GN=Rmdn3 PE=1 SV=2	2437.78	1865.26	1184.24	2480.14	1516.13	2982.71	1511.01	92.0488	-0.494517	0.283796	0.425449	2	0.365468	1	51.3622	59.9151	42.1358	51.5801	53.5446	49.7506	0.0278669
Q3UL36	Arglu1	Arginine and glutamate-rich protein 1 OS=Mus musculus OX=10090 GN=Arglu1 PE=1 SV=2	1466.29	4942.48	1718.83	1873.92	2006.04	4404.42	5234.65	4521.24	1.31409	0.108959	0.225513	2	-0.340286	1	93.2774	76.7593	116.609	94.7192	104.883	85.9742	0.0109326
Q3ULD5	Mccc2	"Methylcrotonoyl-CoA carboxylase beta chain, mitochondrial OS=Mus musculus OX=10090 GN=Mccc2 PE=1 SV=1"	242293	170094	249594	170275	199268	199281	165808	157207	-0.160199	0.367409	0.509784	14	0.472711	0.784361	96.8632	104.079	85.8173	85.1021	97.4925	81.5387	-0.118286
Q3ULJ0	Gpd1l	Glycerol-3-phosphate dehydrogenase 1-like protein OS=Mus musculus OX=10090 GN=Gpd1l PE=1 SV=2	29698.3	19770.1	22541.6	20982.1	14044.1	7903.73	18829.1	8208.66	-1.01828	0.0103657	0.0596804	4	0.824032	0.999023	64.8342	64.0224	60.7624	63.0891	59.8229	68.1153	0.0091855
Q3ULW8	Parp3	Protein mono-ADP-ribosyltransferase PARP3 OS=Mus musculus OX=10090 GN=Parp3 PE=2 SV=1	5718.87	9825.29	7981.27	6401.67	5993.76	3598.91	8776.69	6468.99	-0.199034	0.329693	0.470254	5	0.36996	0.987589	106.932	124.263	112.273	114.623	119.862	101.557	-0.0321765
Q3UM45	Ppp1r7	Protein phosphatase 1 regulatory subunit 7 OS=Mus musculus OX=10090 GN=Ppp1r7 PE=1 SV=2	976.888	346.194	1417.97	2269.82	1775.27	554.562	1149.89	1771.5	0.278186	0.721933	0.80509	1	-0.396752	0.99579	39.288	38.4243	37.1923	42.4557	37.3794	36.1327	0.0101317
Q3UMT1	Ppp1r12c	Protein phosphatase 1 regulatory subunit 12C OS=Mus musculus OX=10090 GN=Ppp1r12c PE=1 SV=1	7.42283	7.42283	7.42283	81.5494	7.42283	3937.39	65.7119	1669.42	5.47964	0.058671	0.154524	1	-0.475063	0.399938	97.7951	86.8823	96.008	103.686	113.682	108.016	0.214092
Q3UMY5	Eml4	Echinoderm microtubule-associated protein-like 4 OS=Mus musculus OX=10090 GN=Eml4 PE=1 SV=1	25401.1	17543.5	22679.9	29236.9	33817.2	37095.1	22763.2	29911.4	0.406073	0.12611	0.245836	3	-0.668376	0.992257	19.7181	20.9786	25.5337	22.8274	22.1039	22.5538	0.0358623
Q3UNZ8	Cryzl2	Quinone oxidoreductase-like protein 2 OS=Mus musculus OX=10090 GN=Cryzl2 PE=1 SV=1	1397.96	2786.01	4432.42	2859.79	1881.77	293.425	2710.15	854.597	-1.15435	0.0831985	0.19112	2	0.417934	0.78448	29.3207	33.3628	28.132	33.0554	34.3885	33.1757	0.151522
Q3UPL0	Sec31a	Protein transport protein Sec31A OS=Mus musculus OX=10090 GN=Sec31a PE=1 SV=2	29596.7	40785.4	45523.3	35080.7	34702.4	67526.3	57793.2	81504.6	0.72381	0.0534966	0.147158	8	-0.675352	0.706867	122.956	124.222	116.676	133.365	135.681	139.726	0.168209
Q3UPY5	Glb1l2	Beta-galactosidase-1-like protein 2 OS=Mus musculus OX=10090 GN=Glb1l2 PE=1 SV=1	2540.02	1842.94	1306.82	1533.2	848.248	307.379	416.886	308.851	-2.22792	0.000380014	0.0173306	1	0.930284	1	387.94	469.111	381.651	384.947	379.816	469.609	-0.00553105
Q3URE1	Acsf3	"Acyl-CoA synthetase family member 3, mitochondrial OS=Mus musculus OX=10090 GN=Acsf3 PE=1 SV=2"	4660.47	6236.49	6128.68	4968.4	6753.85	11183.7	6640.18	7704.17	0.386496	0.0377703	0.119445	5	-0.585312	0.861811	33.1294	31.7033	26.9679	28.5424	29.8652	27.3395	-0.0938075
Q3UVK0	Ermp1	Endoplasmic reticulum metallopeptidase 1 OS=Mus musculus OX=10090 GN=Ermp1 PE=1 SV=2	17251.3	18967.7	16778.7	24367.1	22919.5	32032.2	21135.2	29479	0.523009	0.0614667	0.159464	4	-0.746167	0.850895	171.597	192.677	166.634	201.394	209.908	194.801	0.193294
Q3UW53	Fam129a	Protein Niban OS=Mus musculus OX=10090 GN=Fam129a PE=1 SV=2	581.997	894.486	1198.17	822.082	2872.01	9786.77	3404.35	7218.53	2.5313	0.000191845	0.0156936	2	-0.724099	0.519475	71.0941	77.1327	76.8245	87.1516	80.8575	191.844	0.560709
Q4VAA2	Cdv3	Protein CDV3 OS=Mus musculus OX=10090 GN=Cdv3 PE=1 SV=2	1933.57	2782.84	4962.87	4071.57	7350.34	30678.3	6920.06	19926.3	1.84613	0.00421198	0.0400333	3	-0.64798	1	47.1889	49.6468	44.8353	47.619	48.2551	45.6069	-0.00110448
Q501J6	Ddx17	Probable ATP-dependent RNA helicase DDX17 OS=Mus musculus OX=10090 GN=Ddx17 PE=1 SV=1	1685.29	8163.54	2314.64	3488.86	2690.09	5467.23	10942.3	10008.5	1.38022	0.13415	0.254914	2	-0.40751	0.908985	399.852	346.722	470.954	433.446	511.264	384.77	0.128363
Q505F5	Lrrc47	Leucine-rich repeat-containing protein 47 OS=Mus musculus OX=10090 GN=Lrrc47 PE=1 SV=1	1581.69	4565.55	3705.29	2267.31	5116.52	9178.48	5524.31	3548.4	0.875194	0.0362747	0.117605	5	-0.494041	0.945381	31.1035	28.6747	28.0983	26.887	29.1237	28.5456	-0.0549867
Q58A65	Spag9	C-Jun-amino-terminal kinase-interacting protein 4 OS=Mus musculus OX=10090 GN=Spag9 PE=1 SV=2	2681.04	3807.98	4511.56	4915.07	3177.4	8921.85	4721.11	7610.02	0.532186	0.15927	0.286026	3	-0.602021	0.881773	198.967	209.065	196.7	219.052	226.988	207.835	0.112283
Q5EG47	Prkaa1	5'-AMP-activated protein kinase catalytic subunit alpha-1 OS=Mus musculus OX=10090 GN=Prkaa1 PE=1 SV=2	3092.41	3295.19	2847.36	2085.66	2190.54	2947.08	4310.28	3051.28	0.015173	0.632167	0.737742	1	0.0117134	0.289862	65.6446	67.5282	64.1199	57.4529	58.1174	55.8203	-0.202933
Q5FWK3	Arhgap1	Rho GTPase-activating protein 1 OS=Mus musculus OX=10090 GN=Arhgap1 PE=1 SV=1	6635.94	8812.86	11385.6	10833.2	7294.97	5682.22	4665.96	7902.69	-0.601821	0.0504722	0.142457	4	0.373546	1	68.9467	70.9717	63.9681	70.8932	61.2565	70.8973	-0.00794596
Q5HZJ0	Drosha	Ribonuclease 3 OS=Mus musculus OX=10090 GN=Drosha PE=1 SV=1	219.422	61.8824	184.646	136.782	68.5148	1596.12	169.068	786.525	1.19823	0.18414	0.315019	1	-0.45456	0.979435	45.8316	43.3407	43.2324	45.7862	44.2508	45.4902	0.0339989
Q5SRX1	Tom1l2	TOM1-like protein 2 OS=Mus musculus OX=10090 GN=Tom1l2 PE=1 SV=1	852.209	1463.73	1145.28	1208.37	2814.29	5793.41	2907.51	6073.22	1.80272	0.000301651	0.0156936	1	-0.793861	0.340915	76.483	71.5318	77.6007	84.9444	87.6796	90.1957	0.220676
Q5SSZ5	Tns3	Tensin-3 OS=Mus musculus OX=10090 GN=Tns3 PE=1 SV=1	7270.85	13251.2	9787.62	7886.11	11259.6	20755.5	20904.1	19285.3	1.18729	0.00947011	0.0579919	2	-0.66961	0.896112	59.7088	60.1433	60.3575	58.4777	47.4147	59.536	-0.130966
Q5SW19	Cluh	Clustered mitochondria protein homolog OS=Mus musculus OX=10090 GN=Cluh PE=1 SV=2	20649.1	27720.3	21116.5	17867.7	18034.7	16732.8	19335.9	15256.5	-0.265498	0.11732	0.234229	7	0.797932	0.988347	320.782	340.706	271.139	287.18	349.537	274.154	-0.0355899
Q5SWT3	Slc25a35	Solute carrier family 25 member 35 OS=Mus musculus OX=10090 GN=Slc25a35 PE=1 SV=2	5072.66	5131.09	3244.93	3715.62	2415.9	1169.79	2107.23	784.647	-1.46737	0.00291321	0.0346918	1	0.94755	0.0770929	35.5402	42.988	36.2812	28.503	31.5955	27.1644	-0.393352
Q5SWU9	Acaca	Acetyl-CoA carboxylase 1 OS=Mus musculus OX=10090 GN=Acaca PE=1 SV=1	2.25944e+06	1.5985e+06	1.22951e+06	806275	327657	449663	423115	239409	-1.91271	0.000310519	0.0156936	62	0.961407	0.0106551	468.083	846.818	266.736	182.18	250.692	122.82	-1.41213
Q5SX39	Myh4	Myosin-4 OS=Mus musculus OX=10090 GN=Myh4 PE=2 SV=1	10198.8	6273.42	3977.01	3964.73	7213.46	11508.2	5039.61	7876.44	0.59365	0.273478	0.416099	2	-0.0897491
Q5XG73	Acbd5	Acyl-CoA-binding domain-containing protein 5 OS=Mus musculus OX=10090 GN=Acbd5 PE=1 SV=1	1436.57	4646.24	3328.74	2292.49	2922.14	4941.15	2635	1147.3	0.00646483	0.912616	0.939728	1	0.12783	0.568539	65.5635	75.6598	59.1427	61.079	62.443	35.0628	-0.377822
Q5XJY5	Arcn1	Coatomer subunit delta OS=Mus musculus OX=10090 GN=Arcn1 PE=1 SV=2	52373.9	45196.2	53030.8	48497.6	44928.7	61357.2	57134.6	71303.5	0.232417	0.25805	0.398575	11	-0.560417	1	153.263	168.946	144.903	158.649	147.15	158.499	-0.00668501
Q5XKN4	Jagn1	Protein jagunal homolog 1 OS=Mus musculus OX=10090 GN=Jagn1 PE=1 SV=2	550.298	1151.67	1100.14	190.844	1055.46	384.457	579.014	211.103	-0.721705	0.605294	0.717105	1	0.400586	0.723216	22.9393	23.4057	23.5766	24.5025	26.0834	26.5029	0.140061
Q60575	Kif1b	Kinesin-like protein KIF1B OS=Mus musculus OX=10090 GN=Kif1b PE=1 SV=2	3147.26	5299.63	3530.08	3404.82	1379.85	4393.07	5915.83	4024.84	0.278441	0.789049	0.854104	2	0.0803806	0.793849	233.103	259.203	204.832	257.757	253.312	263.123	0.157725
Q60597	Ogdh	"2-oxoglutarate dehydrogenase, mitochondrial OS=Mus musculus OX=10090 GN=Ogdh PE=1 SV=3"	487651	353653	528050	422773	516030	595734	379242	484020	0.138395	0.518374	0.649673	24	-0.324708	0.98805	303.319	304.363	252.884	279.513	283.912	280.632	-0.0226864
Q60598	Cttn	Src substrate cortactin OS=Mus musculus OX=10090 GN=Cttn PE=1 SV=2	26684.7	38143	40638	36670.3	32847.5	50965.4	36728.2	62284.1	0.210188	0.214259	0.350955	10	-0.592789	0.98805	119.877	122.707	114.736	119.333	116.055	116.031	-0.023591
Q60605	Myl6	Myosin light polypeptide 6 OS=Mus musculus OX=10090 GN=Myl6 PE=1 SV=3	262055	191721	213135	206737	230231	307481	200281	273327	0.257073	0.323519	0.464506	8	-0.361411	0.54602	397.968	370.183	344.701	413.306	414.322	439.942	0.189679
Q60631	Grb2	Growth factor receptor-bound protein 2 OS=Mus musculus OX=10090 GN=Grb2 PE=1 SV=1	10371	12999.7	14797.3	17653.1	16196.1	20638.6	15926.7	22431.6	0.398591	0.0736528	0.17967	4	-0.841034	0.982226	66.2523	67.8186	60.2394	63.6607	63.2586	71.1307	0.0272593
Q60634	Flot2	Flotillin-2 OS=Mus musculus OX=10090 GN=Flot2 PE=1 SV=2	16658.9	24722.3	24401.3	26833.6	28982.9	43138.3	34249.5	33597.2	0.465826	0.019138	0.0854798	8	-0.794787	0.96566	96.4175	103.955	94.0508	105.696	95.0701	102.063	0.0405362
Q60668	Hnrnpd	Heterogeneous nuclear ribonucleoprotein D0 OS=Mus musculus OX=10090 GN=Hnrnpd PE=1 SV=2	69559.6	69358.7	64279.9	60808.2	72034.4	61965.3	66905.6	74108.9	0.0561832	0.704269	0.793046	7	-0.144367	0.834507	54.6441	50.7048	60.4925	49.4124	51.2212	48.0776	-0.153989
Q60675	Lama2	Laminin subunit alpha-2 OS=Mus musculus OX=10090 GN=Lama2 PE=1 SV=2	4481.38	10495.9	7818.49	5936.62	9568.62	15110.5	14889.6	12670.6	1.01156	0.012039	0.0658158	6	-0.66724	0.901467	76.0778	84.5383	75.188	95.606	78.0397	91.4408	0.165522
Q60676	Ppp5c	Serine/threonine-protein phosphatase 5 OS=Mus musculus OX=10090 GN=Ppp5c PE=1 SV=3	656.925	762.131	764.852	1674.48	2064.49	1264.17	1064.05	3024.45	1.08131	0.0494821	0.141009	1	-0.755706	0.896163	43.8057	43.2784	43.03	40.0711	42.1004	41.0935	-0.0782663
Q60692	Psmb6	Proteasome subunit beta type-6 OS=Mus musculus OX=10090 GN=Psmb6 PE=1 SV=3	58569.5	35325.2	48989.3	47164	64266.7	63617.3	35695.3	77185.6	0.411669	0.287738	0.429131	3	-0.505943	0.881432	105.554	110.738	96.1598	97.7147	101.348	93.678	-0.0922955
Q60710	Samhd1	Deoxynucleoside triphosphate triphosphohydrolase SAMHD1 OS=Mus musculus OX=10090 GN=Samhd1 PE=1 SV=3	13432	8784.12	16191.4	11633.7	12585	16280.4	19589.3	16614.4	0.395792	0.124086	0.243811	4	-0.585824	0.111523	89.5093	84.9117	91.79	102.957	105.155	107.549	0.246331
Q60714	Slc27a1	Long-chain fatty acid transport protein 1 OS=Mus musculus OX=10090 GN=Slc27a1 PE=1 SV=1	223137	203437	201845	157636	234751	275324	257838	169972	0.279882	0.269875	0.411702	13	-0.196529	0.259344	297.059	231.053	231.439	335.915	397.341	325.357	0.48363
Q60749	Khdrbs1	"KH domain-containing, RNA-binding, signal transduction-associated protein 1 OS=Mus musculus OX=10090 GN=Khdrbs1 PE=1 SV=2"	863.264	2052.42	1453.75	2255.64	3339.29	4353.04	3309.05	5297.77	1.14223	0.00252448	0.0329256	2	-0.889861	0.918542	48.607	45.2699	46.0838	49.9247	48.5764	46.9881	0.0561109
Q60770	Stxbp3	Syntaxin-binding protein 3 OS=Mus musculus OX=10090 GN=Stxbp3 PE=1 SV=1	10694.4	11124	11613.6	8323.86	9892.97	15644.6	12952.1	12298.9	0.210592	0.197539	0.332712	3	-0.358252	0.635065	48.9109	49.8958	48.1084	47.2643	43.3116	41.4826	-0.155784
Q60823	Akt2	RAC-beta serine/threonine-protein kinase OS=Mus musculus OX=10090 GN=Akt2 PE=1 SV=1	32754.6	29417.1	25662	21103.7	30980.4	22636.7	24484.1	22919.1	-0.213947	0.617374	0.727829	9	0.520409	0.0454083	173.907	190.001	141.647	233.694	219.918	210.13	0.402086
Q60854	Serpinb6	Serpin B6 OS=Mus musculus OX=10090 GN=Serpinb6 PE=1 SV=1	126329	131526	133240	138058	190488	166283	265028	254891	0.735105	0.00568227	0.0451518	11	-0.80022
Q60864	Stip1	Stress-induced-phosphoprotein 1 OS=Mus musculus OX=10090 GN=Stip1 PE=1 SV=1	99755.1	74301.1	101322	94333.7	128234	146068	90920.4	178440	0.496558	0.0522887	0.145451	16	-0.731432	1	59.1618	64.3336	53.4231	59.8572	58.7353	58.8941	0.00872423
Q60865	Caprin1	Caprin-1 OS=Mus musculus OX=10090 GN=Caprin1 PE=1 SV=2	11161.9	14392.1	10352	10614.5	9531.28	8294.42	9368.34	11405.4	-0.204005	0.175097	0.305582	2	0.629451	0.848478	208.732	231.924	197.679	199.64	196.066	200.851	-0.0945312
Q60870	Reep5	Receptor expression-enhancing protein 5 OS=Mus musculus OX=10090 GN=Reep5 PE=1 SV=1	162766	179079	185307	185586	238533	150199	142347	164586	-0.212399	0.753058	0.827028	9	-0.0280335	0.793849	370.153	387.069	316.592	394.781	408.686	380.957	0.146113
Q60876	Eif4ebp1	Eukaryotic translation initiation factor 4E-binding protein 1 OS=Mus musculus OX=10090 GN=Eif4ebp1 PE=1 SV=3	9831.52	10050.8	8732.97	10219.3	12015.8	7386.24	8767.78	19317.6	0.046215	0.525121	0.654627	2	-0.414808	0.998272	233.731	221.469	185.666	224.018	217.027	205.987	0.0197915
Q60902	Eps15l1	Epidermal growth factor receptor substrate 15-like 1 OS=Mus musculus OX=10090 GN=Eps15l1 PE=1 SV=3	1473.87	2146.67	3799.41	2578.62	4737.73	5794.43	5466.99	6125.95	1.25835	0.00202357	0.0309485	2	-0.928	0.991324	48.5868	43.2369	47.1636	42.7513	51.8639	42.2413	-0.0270493
Q60930	Vdac2	Voltage-dependent anion-selective channel protein 2 OS=Mus musculus OX=10090 GN=Vdac2 PE=1 SV=2	70199.6	106329	38355.7	56999.6	30526.6	44267	80325.9	39061.4	-0.60522	0.234597	0.373523	6	0.60082	0.531343	127.028	139.78	117.992	111.628	111.73	115.758	-0.179055
Q60931	Vdac3	Voltage-dependent anion-selective channel protein 3 OS=Mus musculus OX=10090 GN=Vdac3 PE=1 SV=1	25006.8	32542.9	5182.5	14078.5	9141.7	12607.7	18822.3	8610.31	-0.805485	0.470424	0.60523	3	0.658796	0.144059	40.5238	43.0088	37.091	34.0999	34.2897	30.7439	-0.282209
Q60932	Vdac1	Voltage-dependent anion-selective channel protein 1 OS=Mus musculus OX=10090 GN=Vdac1 PE=1 SV=3	97510.8	166432	44873.7	74060	38483.7	56553.2	136943	40769.5	-0.823579	0.31253	0.45552	7	0.522089	0.835131	195.807	204.335	167.646	169.508	175.18	181.124	-0.106206
Q60960	Kpna1	Importin subunit alpha-5 OS=Mus musculus OX=10090 GN=Kpna1 PE=1 SV=2	1183.59	2703.85	2685.39	1491.96	2246.29	7034.62	3249.56	6304.8	1.17717	0.0262715	0.101854	1	-0.629279	1	46.3988	51.8457	47.2142	52.0531	44.9924	48.5056	9.37e-05
Q60972	Rbbp4	Histone-binding protein RBBP4 OS=Mus musculus OX=10090 GN=Rbbp4 PE=1 SV=5	17521.3	7688.6	15601.6	17283.9	21648.4	20362.5	10246.4	28614.8	0.354527	0.258521	0.398946	3	-0.598504	0.781155	147.287	141.045	136.585	126.369	136.521	130.816	-0.110092
Q60994	Adipoq	Adiponectin OS=Mus musculus OX=10090 GN=Adipoq PE=1 SV=2	300829	156632	186897	202062	130499	100507	98572.3	109785	-0.887528	0.00329146	0.0361673	5	0.785433
Q61024	Asns	Asparagine synthetase [glutamine-hydrolyzing] OS=Mus musculus OX=10090 GN=Asns PE=1 SV=3	14652.8	16027.2	18613.6	19962.3	12407.7	9931.71	14082.7	8882.39	-0.637765	0.0135248	0.0700763	6	0.630886	0.859184	75.4092	82.858	70.0589	62.025	69.2403	54.1667	-0.304028
Q61029	Tmpo	"Lamina-associated polypeptide 2, isoforms beta/delta/epsilon/gamma OS=Mus musculus OX=10090 GN=Tmpo PE=1 SV=4"	134753	77018.7	104256	103999	57331.2	155506	113742	194304	0.353014	0.602065	0.715132	11	-0.333893	0.794901	52.6385	50.5388	63.4619	53.9647	51.6908	47.3383	-0.118156
Q61035	Hars	"Histidine--tRNA ligase, cytoplasmic OS=Mus musculus OX=10090 GN=Hars PE=1 SV=2"	28709.1	26380.7	29738	22099.8	25069.8	20443.1	27625.2	25723.7	-0.115968	0.533777	0.660268	8	0.434772	1	49.5794	53.277	44.2448	49.3926	50.2572	48.097	0.0102708
Q61074	Ppm1g	Protein phosphatase 1G OS=Mus musculus OX=10090 GN=Ppm1g PE=1 SV=3	1532.32	1569.76	2330.18	1064.83	1110.22	2626.62	1691.21	2022.5	0.253965	0.577805	0.695856	2	-0.169485	0.970977	53.9958	55.6419	52.3939	55.5216	56.3872	53.3496	0.028492
Q61081	Cdc37	Hsp90 co-chaperone Cdc37 OS=Mus musculus OX=10090 GN=Cdc37 PE=1 SV=1	5784.39	6056.52	7331.81	8273.26	12710	25788.4	13398	23800	1.42209	0.000821608	0.0218861	6	-0.80705	0.871633	100.692	105.137	89.816	102.917	101.447	109.961	0.0906482
Q61107	Gbp4	Guanylate-binding protein 4 OS=Mus musculus OX=10090 GN=Gbp4 PE=1 SV=1	11159.9	6064.2	7599.77	9943.68	9335.1	28070.9	11398.5	21308.6	0.842203	0.0403911	0.124551	3	-0.588448	0.398949	38.2143	34.7941	47.8722	48.427	60.7622	43.9727	0.34115
Q61133	Gstt2	Glutathione S-transferase theta-2 OS=Mus musculus OX=10090 GN=Gstt2 PE=1 SV=4	2792.93	2296.25	2910.57	4112.61	2182.37	190.018	2985.77	575.162	-1.34757	0.0629027	0.161977	1	0.484504	0.739868	39.3893	29.1518	41.4271	42.5345	52.729	39.8485	0.303264
Q61147	Cp	Ceruloplasmin OS=Mus musculus OX=10090 GN=Cp PE=1 SV=2	96549.9	59302.1	75643.7	85215.6	110542	104236	76620	127781	0.418979	0.107434	0.224048	15	-0.663175	0.78681	262.539	256.382	267.663	243.725	209.142	207.193	-0.256844
Q61151	Ppp2r5e	Serine/threonine-protein phosphatase 2A 56 kDa regulatory subunit epsilon isoform OS=Mus musculus OX=10090 GN=Ppp2r5e PE=1 SV=3	91.8036	1740.98	9.74303	1199.99	1826.32	370.176	2168.95	3051.55	2.58411	0.109354	0.225608	1	-0.559101	1	42.1445	40.9758	39.8918	40.347	40.5679	42.0857	-2.55e-05
Q61166	Mapre1	Microtubule-associated protein RP/EB family member 1 OS=Mus musculus OX=10090 GN=Mapre1 PE=1 SV=3	59873.2	47844.7	59924.1	52736.5	78405.6	96866.2	74909.1	108245	0.63312	0.00459342	0.0414604	8	-0.83314	0.910227	113.941	122.624	107.987	121.009	114.992	122.898	0.0602394
Q61171	Prdx2	Peroxiredoxin-2 OS=Mus musculus OX=10090 GN=Prdx2 PE=1 SV=3	252433	218314	264078	367159	344513	267840	209371	232777	-0.0482709	0.791782	0.854577	10	-0.143705	0.991671	134.099	138.307	116.946	129.64	120.035	133.831	-0.019542
Q61191	Hcfc1	Host cell factor 1 OS=Mus musculus OX=10090 GN=Hcfc1 PE=1 SV=2	994.81	1028.61	1132.36	1754.47	2181.97	2874.04	2509.64	3216.97	1.31527	0.000809098	0.0218861	2	-0.940196	0.96566	81.5071	86.4675	82.2911	84.1561	88.5694	84.34	0.0387586
Q61233	Lcp1	Plastin-2 OS=Mus musculus OX=10090 GN=Lcp1 PE=1 SV=4	20869.5	13637.9	20243.2	22358.7	17291.9	33357.1	35979.5	54896	0.753171	0.0496576	0.141009	6	-0.6926	0.978703	71.5601	86.8823	62.1291	74.6178	68.474	86.5189	0.0648691
Q61235	Sntb2	Beta-2-syntrophin OS=Mus musculus OX=10090 GN=Sntb2 PE=1 SV=2	1583.01	1357.24	1398.26	1483.17	888.374	1869.89	2450.98	1791.15	0.345761	0.563556	0.682967	1	-0.272433	0.947981	53.4083	57.2806	51.7022	59.6207	58.2657	54.9254	0.0901989
Q61249	Igbp1	Immunoglobulin-binding protein 1 OS=Mus musculus OX=10090 GN=Igbp1 PE=1 SV=1	5671.27	10332.5	8302.55	6143.77	8563.91	11640.4	9947.91	9813.69	0.468256	0.0945118	0.206283	3	-0.463744	0.850895	42.4686	44.7098	44.869	41.5098	41.7049	41.9301	-0.0770176
Q61285	Abcd2	ATP-binding cassette sub-family D member 2 OS=Mus musculus OX=10090 GN=Abcd2 PE=1 SV=1	187360	191563	146016	139082	128601	99317.5	142222	107423	-0.492864	0.0377511	0.119445	20	0.905861	0.890553	663.762	790.042	611.143	596.208	602.101	559.915	-0.224358
Q61292	Lamb2	Laminin subunit beta-2 OS=Mus musculus OX=10090 GN=Lamb2 PE=1 SV=2	33305.9	48431.9	47955.6	43694.2	97134.1	115003	74471.5	82901.2	0.971114	0.000565506	0.020738	19	-0.825403	0.744874	221.272	206.637	214.635	260.358	264.163	246.276	0.262465
Q61316	Hspa4	Heat shock 70 kDa protein 4 OS=Mus musculus OX=10090 GN=Hspa4 PE=1 SV=1	161505	148156	164391	171021	182221	232274	159225	232711	0.336402	0.123282	0.242781	26	-0.706945	0.869361	139.467	154.259	133.953	137.011	132.591	133.754	-0.0820511
Q61335	Bcap31	B-cell receptor-associated protein 31 OS=Mus musculus OX=10090 GN=Bcap31 PE=1 SV=4	361446	388286	397797	387189	614835	821780	434158	730614	0.789575	0.00905005	0.05662	21	-0.760543	0.999821	233.245	244.08	204.596	226.56	224.862	235.362	0.0139466
Q61409	Pde3b	"cGMP-inhibited 3',5'-cyclic phosphodiesterase B OS=Mus musculus OX=10090 GN=Pde3b PE=1 SV=2"	4608.66	7333.49	6604.93	3535.24	3696.79	4013.23	5874.8	4307.55	-0.408131	0.34994	0.493046	4	0.524244	0.991199	299.491	319.402	251.112	273.562	327.069	287.013	0.0321215
Q61425	Hadh	"Hydroxyacyl-coenzyme A dehydrogenase, mitochondrial OS=Mus musculus OX=10090 GN=Hadh PE=1 SV=2"	336067	289649	283958	237576	308107	350878	285107	292964	0.0670858	0.51186	0.643725	16	-0.0266739	1	324.388	350.02	274.362	318.593	341.479	295.281	0.0147875
Q61543	Glg1	Golgi apparatus protein 1 OS=Mus musculus OX=10090 GN=Glg1 PE=1 SV=1	37299.1	19670.5	35382.5	27800.5	24448.3	55565.6	26220.8	48656.1	0.187591	0.372311	0.514936	7	-0.380843	0.381998	109.363	122.935	105.051	131.67	124.533	139.026	0.230232
Q61545	Ewsr1	RNA-binding protein EWS OS=Mus musculus OX=10090 GN=Ewsr1 PE=1 SV=2	7120.22	13752	5021.64	9586.29	7531.94	2001.21	7025.49	5945.94	-0.354195	0.160946	0.288736	2	0.524273	0.962678	146.922	128.391	161.707	135.296	155.579	129.026	-0.0558518
Q61553	Fscn1	Fascin OS=Mus musculus OX=10090 GN=Fscn1 PE=1 SV=4	26099.4	21036.1	28611.8	31990.9	35658.4	36930.4	35796.7	43924	0.412008	0.020975	0.0898643	8	-0.948312	0.279348	71.7627	53.8994	63.6307	78.0469	85.0842	77.6867	0.355892
Q61554	Fbn1	Fibrillin-1 OS=Mus musculus OX=10090 GN=Fbn1 PE=1 SV=2	155183	122667	390807	108833	333892	767285	140501	329655	1.26581	0.119628	0.237474	44	-0.445195	0.0682296	203.606	239.019	154.503	501.83	271.38	436.051	0.993824
Q61598	Gdi2	Rab GDP dissociation inhibitor beta OS=Mus musculus OX=10090 GN=Gdi2 PE=1 SV=1	311924	311885	349058	314950	350986	459967	406274	447324	0.443729	0.045586	0.135275	16	-0.793303	0.769103	316.022	326.31	295.873	295.062	287.101	286.391	-0.110228
Q61599	Arhgdib	Rho GDP-dissociation inhibitor 2 OS=Mus musculus OX=10090 GN=Arhgdib PE=1 SV=3	11545	3887.76	8681.02	7567.66	10696.1	31209.6	7852.43	56482.6	1.17261	0.0543446	0.148548	3	-0.600282	0.991671	43.826	43.154	39.3856	47.5402	36.9839	43.9144	0.0172631
Q61646	Hp	Haptoglobin OS=Mus musculus OX=10090 GN=Hp PE=1 SV=1	11135.5	11576.3	15925.4	14474.6	40680.1	15236.6	11759.6	16018	0.271274	0.21466	0.35128	4	-0.443675	0.725846	3125.9	2719.01	2569.12	2533.56	2116.4	2247.25	-0.285896
Q61655	Ddx19a	ATP-dependent RNA helicase DDX19A OS=Mus musculus OX=10090 GN=Ddx19a PE=1 SV=2	11576.4	13076.3	13405.1	12647.9	11239.1	11904.3	12096.5	12065	-0.101775	0.500935	0.633202	4	0.443975	0.974512	19.3535	17.4729	17.9076	18.3144	18.075	19.6356	0.0340547
Q61656	Ddx5	Probable ATP-dependent RNA helicase DDX5 OS=Mus musculus OX=10090 GN=Ddx5 PE=1 SV=2	43700.6	47230.7	40101.9	37450.1	37830.3	56787.4	61520.8	53692.6	0.399486	0.162297	0.290259	7	-0.413119	0.967784	801.379	731.461	951.923	842.075	991.205	757.336	0.0599847
Q61686	Cbx5	Chromobox protein homolog 5 OS=Mus musculus OX=10090 GN=Cbx5 PE=1 SV=1	706.626	839.504	1542.33	1059.4	570.645	6346.29	886.428	6699.27	1.33057	0.205231	0.340024	1	-0.562189	0.713214	106.689	108.456	131.119	112.495	100.953	100.156	-0.138531
Q61699	Hsph1	Heat shock protein 105 kDa OS=Mus musculus OX=10090 GN=Hsph1 PE=1 SV=2	9076.13	6971.15	6134.63	6446.78	7986.33	13100.1	7215.34	13592.2	0.60953	0.0843255	0.193046	4	-0.51973	1	45.6695	43.0917	46.3538	46.9292	43.4846	46.7936	0.0219916
Q61703	Itih2	Inter-alpha-trypsin inhibitor heavy chain H2 OS=Mus musculus OX=10090 GN=Itih2 PE=1 SV=1	11832.1	7941.3	10158.3	14849.5	17300.7	21661.9	11886.8	22659.5	0.820309	0.0300513	0.107824	6	-0.795	0.997854	2.1336	2.74464	3.41457	2.66691	2.2063	3.23582	-0.0235625
Q61735	Cd47	Leukocyte surface antigen CD47 OS=Mus musculus OX=10090 GN=Cd47 PE=1 SV=2	3560.79	6287.14	2732.05	8149.05	7011.15	8918.6	15853.1	4935.13	0.740934	0.0980232	0.211411	2	-0.450647	0.988119	141.209	131.876	132.148	138.528	131.108	129.007	-0.0235953
Q61738	Itga7	Integrin alpha-7 OS=Mus musculus OX=10090 GN=Itga7 PE=1 SV=3	12491	8032.32	16235.8	20616.1	26321.3	20026.3	13214.2	12943.1	0.191966	0.33161	0.472599	5	-0.505553	0.726748	162.623	188.009	152.597	191.127	218.93	176.3	0.220323
Q61739	Itga6	Integrin alpha-6 OS=Mus musculus OX=10090 GN=Itga6 PE=1 SV=3	10534.6	15058.4	10158.3	13169.2	13259.8	24169	20552.8	18958	0.744921	0.0232359	0.0961048	8	-0.639755	0.991671	201.803	221.262	190.356	231.113	206.546	215.986	0.0928648
Q61753	Phgdh	D-3-phosphoglycerate dehydrogenase OS=Mus musculus OX=10090 GN=Phgdh PE=1 SV=3	1.42147e+06	1.7341e+06	1.63655e+06	1.00735e+06	1.60693e+06	2.42899e+06	1.86853e+06	2.19654e+06	0.409548	0.0581564	0.154238	31	-0.517993	0.988347	145.747	199.066	126.867	164.975	192.21	158.382	0.149438
Q61768	Kif5b	Kinesin-1 heavy chain OS=Mus musculus OX=10090 GN=Kif5b PE=1 SV=3	54521.6	65748.3	74093.6	52675.2	63509.9	105711	67329	95873.3	0.424287	0.104479	0.219736	16	-0.563911	0.948972	123.281	134.988	109.489	127.512	124.336	132.431	0.0681852
Q61792	Lasp1	LIM and SH3 domain protein 1 OS=Mus musculus OX=10090 GN=Lasp1 PE=1 SV=1	124094	180621	194720	209880	202236	335843	241319	401368	0.60218	0.0280009	0.105034	15	-0.781971	0.257771	241.085	232.775	216.035	279.632	259.022	270.477	0.230788
Q61830	Mrc1	Macrophage mannose receptor 1 OS=Mus musculus OX=10090 GN=Mrc1 PE=1 SV=2	13471.4	7081.92	8009.12	12272.7	7276.77	3867.8	9068.74	2911.23	-0.902109	0.0472923	0.137744	4	0.61071	0.942894	109.565	129.096	91.5369	102.208	87.1111	112.704	-0.122563
Q61838	Pzp	Pregnancy zone protein OS=Mus musculus OX=10090 GN=Pzp PE=1 SV=3	1.39122e+06	949762	906426	1.25738e+06	1.01231e+06	907558	693648	900671	-0.273465	0.129643	0.250469	37	0.539516	0.84656	1.72842	5.98071	5.96224	1.74067	1.06929	6.27066	-0.800239
Q61879	Myh10	Myosin-10 OS=Mus musculus OX=10090 GN=Myh10 PE=1 SV=2	60193.2	46108.2	56611.1	64074.9	60865.3	108166	120109	111060	0.908881	0.0119935	0.0658066	28	-0.751654	0.103769	59.4049	61.5954	53.0857	73.3369	75.2714	71.7727	0.342783
Q61937	Npm1	Nucleophosmin OS=Mus musculus OX=10090 GN=Npm1 PE=1 SV=1	120087	105947	78242.5	72525	82627.2	114214	70929.8	108311	0.0552555	0.995077	0.996802	10	0.242793	0.506895	109.687	111.962	110.383	103.647	97.097	99.2614	-0.146814
Q61990	Pcbp2	Poly(rC)-binding protein 2 OS=Mus musculus OX=10090 GN=Pcbp2 PE=1 SV=1	13892.9	13021.2	14971.3	13683.7	13771.3	17966.4	13313.9	11907.5	-0.0261031	0.908641	0.937307	1	-0.0479519	0.927188	205.409	196.141	207.549	195.719	194.064	190.307	-0.0700678
Q62000	Ogn	Mimecan OS=Mus musculus OX=10090 GN=Ogn PE=1 SV=1	81508.3	64866.8	55030.6	50480.5	41579.3	42491.8	58074.8	45702.4	-0.43913	0.0781506	0.185782	6	0.828281	0.00056057	199.595	204.127	180.047	136.498	122.235	113.871	-0.649659
Q62048	Pea15	Astrocytic phosphoprotein PEA-15 OS=Mus musculus OX=10090 GN=Pea15 PE=1 SV=1	10220.6	9063.89	10138.2	8990.3	7199.65	3769.78	8776.78	4667.31	-0.725673	0.0259767	0.101579	1	0.749478
Q62059	Vcan	Versican core protein OS=Mus musculus OX=10090 GN=Vcan PE=1 SV=2	1148.61	482.428	1183.31	1289.41	569.149	10124.7	1164.21	1902.54	0.352282	0.253012	0.392895	2	-0.334102	0.833975	30.1716	40.0839	34.729	51.5801	33.8942	45.2956	0.304958
Q62086	Pon2	Serum paraoxonase/arylesterase 2 OS=Mus musculus OX=10090 GN=Pon2 PE=1 SV=2	18334.6	12645.1	17187.1	16186.1	26741.4	39079.1	14652	28439.9	0.725455	0.046878	0.137006	2	-0.625167	0.949542	98.8688	100.076	87.8588	104.73	87.4077	104.961	0.0481455
Q62087	Pon3	Serum paraoxonase/lactonase 3 OS=Mus musculus OX=10090 GN=Pon3 PE=1 SV=2	139067	120376	162222	167568	182180	198732	122519	226751	0.341218	0.241559	0.380911	6	-0.676357	0.973911	99.5171	101.88	79.0516	94.8374	101.225	93.3668	0.0537714
Q62093	Srsf2	Serine/arginine-rich splicing factor 2 OS=Mus musculus OX=10090 GN=Srsf2 PE=1 SV=4	18814.8	23447	14879	25096.1	16085.5	20615.8	19905.1	37422.5	-0.0521916	0.630271	0.737018	6	-0.335134	0.987589	130.452	110.945	139.436	124.851	136.744	110.214	-0.03366
Q62159	Rhoc	Rho-related GTP-binding protein RhoC OS=Mus musculus OX=10090 GN=Rhoc PE=1 SV=2	1313.09	1102.25	734.379	882.638	3501.32	7177.6	5780.71	13942.9	2.7072	8.69e-05	0.0156936	2	-0.760197	0.928421	89.9955	90.4296	87.1502	99.3701	89.3851	96.9463	0.0932936
Q62167	Ddx3x	ATP-dependent RNA helicase DDX3X OS=Mus musculus OX=10090 GN=Ddx3x PE=1 SV=3	33339.4	54260.2	29202.7	33694.3	31559.4	32552.8	51525.4	50671.3	0.277109	0.592997	0.709713	15	-0.0737542	1	206.442	224.768	223.999	224.176	209.636	216.317	-0.0106678
Q62186	Ssr4	Translocon-associated protein subunit delta OS=Mus musculus OX=10090 GN=Ssr4 PE=1 SV=1	8759.88	5804.85	6287.14	7195.05	6803.06	6141.84	5239.82	7971.99	-0.0572763	0.634535	0.740006	2	0.160766	0.998763	57.1967	57.1769	54.5198	53.1961	56.5602	60.4504	0.00957181
Q62188	Dpysl3	Dihydropyrimidinase-related protein 3 OS=Mus musculus OX=10090 GN=Dpysl3 PE=1 SV=1	1354.28	5823.62	2939.98	4183.34	3035.23	3846.28	4430.6	7858	0.235254	0.299886	0.441966	2	-0.411122	0.844071	40.7466	44.5646	40.5498	60.9411	43.8059	73.6208	0.472127
Q62189	Snrpa	U1 small nuclear ribonucleoprotein A OS=Mus musculus OX=10090 GN=Snrpa PE=1 SV=3	18209.1	13140.7	9627.22	12078.5	13480.7	24417.4	11952.2	42107	0.526159	0.150165	0.273457	3	-0.483501	0.98805	21.7845	23.4057	22.0919	23.1624	23.2656	23.0207	0.0464128
Q62203	Sf3a2	Splicing factor 3A subunit 2 OS=Mus musculus OX=10090 GN=Sf3a2 PE=1 SV=2	2867.09	3142.05	7815.94	4004.09	4800.94	3018.41	1684.81	5798.57	0.101963	0.59491	0.71053	3	-0.0739112	0.976687	17.1858	15.7096	15.1069	16.6984	16.8391	15.8421	0.0424058
Q62261	Sptbn1	"Spectrin beta chain, non-erythrocytic 1 OS=Mus musculus OX=10090 GN=Sptbn1 PE=1 SV=2"	531581	1.08101e+06	574390	673204	859528	1.32548e+06	1.72163e+06	1.22837e+06	1.03702	0.0167757	0.0789619	97	-0.582691	0.0707084	1259.1	1277.61	1124.32	1777.87	1693.95	1757.67	0.516435
Q62264	Thrsp	Thyroid hormone-inducible hepatic protein OS=Mus musculus OX=10090 GN=Thrsp PE=1 SV=1	180871	167327	114312	136974	75698.5	101169	71006.5	68761.2	-1.04611	0.0020926	0.0309485	6	0.94543	0.490283	1439.12	1846.8	760.544	727.202	1171.25	588.532	-0.670552
Q62318	Trim28	Transcription intermediary factor 1-beta OS=Mus musculus OX=10090 GN=Trim28 PE=1 SV=3	14068.2	12131.1	16316.1	18179.2	18852.9	28227.5	18314.4	19950.3	0.356234	0.0465024	0.137006	4	-0.72663	1	74.5381	73.5232	74.0407	74.6967	71.2671	76.5389	0.00199304
Q62376	Snrnp70	U1 small nuclear ribonucleoprotein 70 kDa OS=Mus musculus OX=10090 GN=Snrnp70 PE=1 SV=2	2743.62	8554.95	2918.59	4938.54	2211.16	4837.87	6772.74	12488.4	0.592377	0.539993	0.664636	3	-0.289951	0.97858	171.071	143.306	179.44	163.005	202.245	145.582	0.0418849
Q62417	Sorbs1	Sorbin and SH3 domain-containing protein 1 OS=Mus musculus OX=10090 GN=Sorbs1 PE=1 SV=2	120278	244986	177746	162399	212387	356504	290044	368154	0.920414	0.0151637	0.0753514	16	-0.703932	0.202596	244.853	328.052	177.516	332.999	369.41	372.922	0.561941
Q62418	Dbnl	Drebrin-like protein OS=Mus musculus OX=10090 GN=Dbnl PE=1 SV=2	5793.52	19101.6	16369.7	11616.7	14341.7	35957.6	19963.2	31401.2	0.860464	0.0488221	0.140313	2	-0.623683	0.873803	54.1579	57.1562	47.0961	54.2012	57.2028	57.2599	0.0947494
Q62425	Ndufa4	Cytochrome c oxidase subunit NDUFA4 OS=Mus musculus OX=10090 GN=Ndufa4 PE=1 SV=2	139674	125959	119218	107740	89540.4	97372.3	68515.2	70991.1	-0.620116	0.00938533	0.0578818	4	0.931603	0.381998	216.572	226.282	186.442	173.016	189.541	173.226	-0.228542
Q62426	Cstb	Cystatin-B OS=Mus musculus OX=10090 GN=Cstb PE=1 SV=1	18147.4	24939.9	31593.3	31785	46721	51586.8	47501.1	60858.1	0.818445	0.00173173	0.0288566	4	-0.964526	1	50.5113	52.551	44.1941	50.3386	47.7607	51.9295	0.0299545
Q62433	Ndrg1	Protein NDRG1 OS=Mus musculus OX=10090 GN=Ndrg1 PE=1 SV=1	35978.5	49204.8	52328.9	37309.4	52293.3	115502	60993.7	86659.8	0.762842	0.0187105	0.0846615	3	-0.629449	0.970014	150.265	118.081	171.578	173.036	167.937	162.468	0.210998
Q62446	Fkbp3	Peptidyl-prolyl cis-trans isomerase FKBP3 OS=Mus musculus OX=10090 GN=Fkbp3 PE=1 SV=2	53462.4	32350.8	47621.5	40932.7	19892.8	32501.5	19152.1	26742.8	-0.936733	0.00744198	0.051722	8	0.743908	0.703793	34.9527	37.1175	43.2324	36.2874	36.5884	30.2187	-0.161107
Q62448	Eif4g2	Eukaryotic translation initiation factor 4 gamma 2 OS=Mus musculus OX=10090 GN=Eif4g2 PE=1 SV=2	6292.31	7089.64	6917.33	5469.34	6016.36	9645.2	8048.1	11205.7	0.417328	0.0992453	0.212409	3	-0.566669	0.908019	727.05	819.436	685.987	717.013	681.37	712.28	-0.0773281
Q62465	Vat1	Synaptic vesicle membrane protein VAT-1 homolog OS=Mus musculus OX=10090 GN=Vat1 PE=1 SV=3	68767.5	59518.8	77341.7	83364.1	114241	184440	115096	202754	0.99844	0.00210728	0.0309485	10	-0.833565	0.432002	95.0804	91.5083	87.2177	109.657	99.2227	119.513	0.259008
Q62523	Zyx	Zyxin OS=Mus musculus OX=10090 GN=Zyx PE=1 SV=2	13693.1	26657.9	28596.4	23055.5	23293.1	71922.6	47207.9	79416.4	1.2329	0.0201211	0.0889176	7	-0.711291	0.0775133	92.1429	94.7028	103.82	125.817	116.5	125.369	0.340112
Q63844	Mapk3	Mitogen-activated protein kinase 3 OS=Mus musculus OX=10090 GN=Mapk3 PE=1 SV=5	35738.3	42792.4	43699.8	35549.6	45629.5	95166.2	68143.2	93444	1.02892	0.00768677	0.0520358	9	-0.723143	0.907728	122.713	116.712	116.339	129.246	125.819	124.435	0.0934276
Q63918	Cavin2	Caveolae-associated protein 2 OS=Mus musculus OX=10090 GN=Cavin2 PE=1 SV=3	2.28336e+06	1.85052e+06	1.64356e+06	1.8073e+06	1.77784e+06	3.05524e+06	1.94173e+06	3.14945e+06	0.413429	0.177379	0.307706	29	-0.454812	0.388203	556.492	550.49	447.131	648.294	677.218	675.415	0.371422
Q63932	Map2k2	Dual specificity mitogen-activated protein kinase kinase 2 OS=Mus musculus OX=10090 GN=Map2k2 PE=1 SV=2	4203.62	3906.71	4619.48	3722.43	7689.91	8795.37	8621.6	7656.87	1.00667	0.000126136	0.0156936	3	-0.862546	0.997854	71.1549	74.104	58.9402	67.5036	69.0673	70.1191	0.0243347
Q64012	Raly	RNA-binding protein Raly OS=Mus musculus OX=10090 GN=Raly PE=1 SV=3	9267.3	7721.88	10426.9	9603.68	7839	15662.3	10564.4	15414.3	0.435798	0.178052	0.30853	5	-0.583925	0.933997	84.8093	81.6548	76.1834	86.0677	82.39	83.8148	0.0573032
Q64105	Spr	Sepiapterin reductase OS=Mus musculus OX=10090 GN=Spr PE=1 SV=1	52740.6	61839	71992.7	75103.5	89507.7	109707	103287	123122	0.673907	0.00422741	0.0400333	9	-0.937108	0.638995	28.8345	26.3721	25.7193	29.3701	30.8045	30.0241	0.157984
Q64133	Maoa	Amine oxidase [flavin-containing] A OS=Mus musculus OX=10090 GN=Maoa PE=1 SV=3	12807.1	13031.9	10359.4	12523.3	7627.45	3535.51	7750.79	2693.37	-1.28615	0.00540939	0.0448185	4	0.871671	1	39.2678	44.1912	36.1293	38.5143	36.5884	42.8833	-0.0176925
Q64152	Btf3	Transcription factor BTF3 OS=Mus musculus OX=10090 GN=Btf3 PE=1 SV=3	11918.3	7164.16	8153.32	10136.6	9693.64	15822.6	4379.05	10976.8	0.18227	0.967612	0.981312	1	-0.135223	0.982226	84.0394	85.0776	76.3859	80.668	80.1902	80.6438	-0.022056
Q64213	Sf1	Splicing factor 1 OS=Mus musculus OX=10090 GN=Sf1 PE=1 SV=6	5087.35	3693.4	4732.73	3764.33	4581.1	6684.97	3799.65	5580.45	0.260506	0.309269	0.451908	2	-0.358631	0.974877	121.741	106.983	130.984	119.274	137.065	113.132	0.0388569
Q64310	Surf4	Surfeit locus protein 4 OS=Mus musculus OX=10090 GN=Surf4 PE=1 SV=1	675.962	617.197	51.8301	849.041	741.881	230.937	621.436	57.8192	-0.769785	0.721205	0.805032	1	0.273495	0.967805	256.461	256.776	235.708	243.469	243.598	241.607	-0.0384487
Q64331	Myo6	Unconventional myosin-VI OS=Mus musculus OX=10090 GN=Myo6 PE=1 SV=1	1393.76	2523.19	1179.53	2036.38	3261.1	6630.46	4196.87	4549.84	1.37507	0.00144842	0.0274059	3	-0.729475	0.82495	64.1049	55.4759	87.049	58.8521	52.5807	71.3642	-0.162432
Q64433	Hspe1	"10 kDa heat shock protein, mitochondrial OS=Mus musculus OX=10090 GN=Hspe1 PE=1 SV=2"	106565	75820.8	98981.5	106007	136263	137759	66739.9	113430	0.279399	0.497357	0.630563	7	-0.409536	0.742675	25.1475	32.4501	23.7284	21.4281	27.1957	22.8845	-0.179331
Q64442	Sord	Sorbitol dehydrogenase OS=Mus musculus OX=10090 GN=Sord PE=1 SV=3	19648.8	12504.3	18622.5	19855.4	24846.1	11243.3	10882.9	7568.28	-0.790182	0.198875	0.333641	4	0.281767	0.901467	63.639	61.2013	68.0174	60.606	48.1562	53.1551	-0.257328
Q64471	Gstt1	Glutathione S-transferase theta-1 OS=Mus musculus OX=10090 GN=Gstt1 PE=1 SV=4	15346.6	13416	20636.2	18100.1	17301	24324.3	16589.6	14983.3	0.0236146	0.620509	0.729541	2	-0.307507	0.857105	105.068	99.7021	114.786	100.986	98.7283	91.9272	-0.130572
Q64514	Tpp2	Tripeptidyl-peptidase 2 OS=Mus musculus OX=10090 GN=Tpp2 PE=1 SV=3	4924.31	6477.23	6174.56	5356.75	7783.22	9858.97	7505.67	5201.98	0.410326	0.124515	0.244378	4	-0.444038	0.979435	46.6419	54.0861	48.1084	48.762	48.7742	46.3267	-0.0464851
Q64518	Atp2a3	Sarcoplasmic/endoplasmic reticulum calcium ATPase 3 OS=Mus musculus OX=10090 GN=Atp2a3 PE=1 SV=3	349.123	240.758	153.615	128.447	555.886	1399.47	1025.96	596.873	2.02471	0.000782633	0.0218861	1	-0.618941	1.94e-05	45.1428	43.5481	45.7632	82.7766	80.9317	80.955	0.863918
Q64520	Guk1	Guanylate kinase OS=Mus musculus OX=10090 GN=Guk1 PE=1 SV=2	2977.92	3237.71	3407.25	1962.56	2451.42	4019.91	2613.02	5851.63	0.061801	0.360864	0.504337	2	-0.350148	0.652509	28.6117	29.9193	27.7102	30.9664	28.6541	37.1054	0.157659
Q64521	Gpd2	"Glycerol-3-phosphate dehydrogenase, mitochondrial OS=Mus musculus OX=10090 GN=Gpd2 PE=1 SV=2"	328011	254552	280772	235857	125321	124802	83880.4	108766	-1.19824	0.000102048	0.0156936	25	0.928668	0.0173599	83.5127	105.262	59.5983	49.4715	50.7268	41.5604	-0.776205
Q64523	Hist2h2ac	Histone H2A type 2-C OS=Mus musculus OX=10090 GN=Hist2h2ac PE=1 SV=3	124422	276847	137633	333491	336621	185529	437810	153079	0.356427	0.447736	0.587387	1	-0.289601
Q64674	Srm	Spermidine synthase OS=Mus musculus OX=10090 GN=Srm PE=1 SV=1	10469.8	9058.45	9040.73	10398.8	10505.5	9028.14	12055.5	15180.2	0.213541	0.249894	0.389098	2	-0.568509	1	26.1401	27.8034	23.0198	25.5864	26.3801	25.3357	0.0105303
Q64727	Vcl	Vinculin OS=Mus musculus OX=10090 GN=Vcl PE=1 SV=4	1.18297e+06	1.14539e+06	1.22963e+06	1.38298e+06	1.54004e+06	1.86087e+06	1.70994e+06	2.12784e+06	0.564647	0.00963906	0.0586123	67	-0.901321	0.399938	178.445	209.936	169.249	207.7	214.802	246.354	0.264556
Q64735	Cr1l	Complement component receptor 1-like protein OS=Mus musculus OX=10090 GN=Cr1l PE=1 SV=1	6180.23	4408.34	7776.26	9773.44	12247.5	12228.7	9452.76	11690.2	0.786342	0.0174327	0.0802166	2	-0.931514	0.886503	68.5618	67.4659	61.5554	67.5036	70.1548	69.5938	0.0703384
Q64737	Gart	Trifunctional purine biosynthetic protein adenosine-3 OS=Mus musculus OX=10090 GN=Gart PE=1 SV=3	4327.67	4573.77	6609.29	4889.27	8115.37	16302.7	8477.34	15957.9	1.2984	0.0028001	0.034173	3	-0.772376	0.993699	51.1799	51.742	45.4258	48.9788	51.3942	46.5018	-0.0131247
Q64FW2	Retsat	"All-trans-retinol 13,14-reductase OS=Mus musculus OX=10090 GN=Retsat PE=1 SV=3"	2950.85	5264.03	8587.47	3475.31	3528.37	648.403	1570.06	2736.43	-1.0451	0.0340479	0.115019	3	0.506467	0.905037	101.381	107.025	80.9919	101.991	120.307	97.6272	0.148979
Q68FD5	Cltc	Clathrin heavy chain 1 OS=Mus musculus OX=10090 GN=Cltc PE=1 SV=3	535061	493040	493060	381913	460174	586878	621198	447814	0.075887	0.450728	0.589519	35	-0.0590571	0.918178	327.893	400.947	321.89	337.985	314.092	336.29	-0.0817832
Q68FF6	Git1	ARF GTPase-activating protein GIT1 OS=Mus musculus OX=10090 GN=Git1 PE=1 SV=1	536.787	706.947	655.707	1143.92	1771.04	2599.69	1223.93	1362.3	1.18992	0.00434867	0.0402806	1	-0.740861	0.150194	59.4454	57.2599	58.1135	72.0362	70.7481	63.4074	0.236033
Q68FL4	Ahcyl2	Putative adenosylhomocysteinase 3 OS=Mus musculus OX=10090 GN=Ahcyl2 PE=1 SV=1	44748.8	86824.9	77674	64547.4	60450.7	99130.4	74730.2	112608	0.281614	0.248695	0.388628	10	-0.486406	0.942894	205.126	228.377	169.469	183.421	194.929	178.829	-0.104085
Q68FL6	Mars	"Methionine--tRNA ligase, cytoplasmic OS=Mus musculus OX=10090 GN=Mars PE=1 SV=1"	12142.5	10279.2	10232.8	6498.15	6101.31	5079.97	8487.25	4596.27	-0.881425	0.028874	0.106692	6	0.879507	0.979189	47.7156	47.365	38.7276	46.141	46.4013	44.1089	0.0365457
Q69ZX8	Ablim3	Actin-binding LIM protein 3 OS=Mus musculus OX=10090 GN=Ablim3 PE=1 SV=2	976.067	1954.45	1530.3	1452.79	1469.31	2750.95	1619.04	2259.75	0.359329	0.14427	0.266262	2	-0.499103	0.881432	117.405	90.7822	115.984	127.039	134.346	109.494	0.198724
Q6A028	Swap70	Switch-associated protein 70 OS=Mus musculus OX=10090 GN=Swap70 PE=1 SV=2	95.6981	133.804	97.4165	378.248	228.164	2450.53	1169.17	2631.89	3.89004	0.00531568	0.0448185	1	-0.713744	0.861628	35.7833	32.3256	37.2598	37.8442	36.6378	37.8836	0.0951338
Q6A0A9	FAM120A	Constitutive coactivator of PPAR-gamma-like protein 1 OS=Mus musculus OX=10090 GN=FAM120A PE=1 SV=2	7543.52	9202.67	8365.45	6932.66	5401.63	6486.02	10517.6	6981.85	-0.23937	0.497671	0.630563	3	0.3273	0.967784	156.93	160.192	144.363	156.56	160.275	156.437	0.0377423
Q6GQT9	Nomo1	Nodal modulator 1 OS=Mus musculus OX=10090 GN=Nomo1 PE=1 SV=1	16480.7	19479.2	21977.9	23164	25316.8	25980.8	30150.9	23556.3	0.309777	0.0578136	0.15414	7	-0.815723	0.871735	107.479	122.106	82.0549	111.766	109.085	116.926	0.134894
Q6GV12	Kdsr	3-ketodihydrosphingosine reductase OS=Mus musculus OX=10090 GN=Kdsr PE=1 SV=1	38781.9	40119.2	43006	36446.9	41528.8	66825	40646.3	53247.9	0.253579	0.137846	0.259942	6	-0.513454	0.876645	67.9338	61.7199	62.4327	55.9946	58.3399	63.6409	-0.110815
Q6IRU2	Tpm4	Tropomyosin alpha-4 chain OS=Mus musculus OX=10090 GN=Tpm4 PE=1 SV=3	96097.9	46555.3	90105.9	70620.5	96762.7	180043	71147.5	156181	0.623946	0.0824739	0.190729	14	-0.585042	0.623887	253.645	259.804	228.385	314.947	272.765	315.319	0.282623
Q6IRU5	Cltb	Clathrin light chain B OS=Mus musculus OX=10090 GN=Cltb PE=1 SV=1	14427.4	14184.7	10664.6	10121.3	14261.6	19132.3	13826.4	18124.6	0.386461	0.074161	0.180507	3	-0.461994	0.215591	68.501	67.0718	59.1427	82.3037	79.152	78.4844	0.303985
Q6NSR8	Npepl1	Probable aminopeptidase NPEPL1 OS=Mus musculus OX=10090 GN=Npepl1 PE=1 SV=1	7128.43	5678.83	8370.93	7822.09	6396.17	7929.12	7468.87	9312.17	0.043455	0.605381	0.717105	1	-0.481381	0.982364	83.1683	84.4138	80.9582	81.673	85.9246	74.613	-0.0394438
Q6NVF9	Cpsf6	Cleavage and polyadenylation specificity factor subunit 6 OS=Mus musculus OX=10090 GN=Cpsf6 PE=1 SV=1	22.5774	262.049	630.404	630.244	462.03	1198.83	2014.39	2802.55	1.93504	0.0393114	0.122129	1	-0.757091	1	48.9717	48.1325	53.3388	49.1167	57.45	43.2335	-0.0144906
Q6NZJ6	Eif4g1	Eukaryotic translation initiation factor 4 gamma 1 OS=Mus musculus OX=10090 GN=Eif4g1 PE=1 SV=1	41233.4	81055.9	44240.5	48447	41503	72728.6	69049.4	75224.6	0.614189	0.346008	0.489097	13	-0.219654	0.866671	458.258	502.136	381.853	482.734	482.814	487.235	0.123353
Q6P069	Sri	Sorcin OS=Mus musculus OX=10090 GN=Sri PE=1 SV=1	37918.3	38109.9	39661.9	38567.4	45914.8	26778.1	42485.3	29046.9	-0.1261	0.535765	0.661782	3	0.213326	0.964533	80.4334	78.5432	82.1392	81.0621	76.1365	78.0564	-0.0357404
Q6P1B1	Xpnpep1	Xaa-Pro aminopeptidase 1 OS=Mus musculus OX=10090 GN=Xpnpep1 PE=1 SV=1	4150.18	3407.15	6407.92	6429.8	9699.35	7270.41	7086.74	7907.45	0.556109	0.0226639	0.0951005	3	-0.899804	0.984754	55.1506	53.36	44.0592	49.2547	52.0369	48.097	-0.0242779
Q6P1F6	Ppp2r2a	Serine/threonine-protein phosphatase 2A 55 kDa regulatory subunit B alpha isoform OS=Mus musculus OX=10090 GN=Ppp2r2a PE=1 SV=1	10434.7	17706.6	6953.93	9931.88	11210.6	6178.68	16642.9	6741.57	-0.227752	0.655303	0.75679	3	0.320835	0.980326	53.7932	54.0861	62.1291	56.3887	57.0545	53.4858	-0.0236818
Q6P4T2	Snrnp200	U5 small nuclear ribonucleoprotein 200 kDa helicase OS=Mus musculus OX=10090 GN=Snrnp200 PE=1 SV=1	5923.45	4220.33	21467.5	49004.8	50077	53266.5	22843.2	16292.7	1.58463	0.130486	0.250959	5	-0.578923	0.976728	121.214	124.616	108.696	118.979	126.239	117.646	0.0353229
Q6P5E4	Uggt1	UDP-glucose:glycoprotein glucosyltransferase 1 OS=Mus musculus OX=10090 GN=Uggt1 PE=1 SV=4	39152	31616	41974.8	38155.5	27939.6	46176.5	34522.6	51953.4	0.0468614	0.812137	0.86989	11	-0.2863	0.891485	81.8312	89.2264	77.4657	85.1415	81.3025	99.2225	0.0933827
Q6P5F9	Xpo1	Exportin-1 OS=Mus musculus OX=10090 GN=Xpo1 PE=1 SV=1	201.823	738.513	20.4763	52.6374	469.609	165.791	1204.87	436.539	2.13516	0.0964732	0.209509	1	-0.207963	0.549068	73.9709	73.2328	81.8524	68.3115	67.0157	60.7811	-0.224073
Q6P6M7	Sepsecs	O-phosphoseryl-tRNA(Sec) selenium transferase OS=Mus musculus OX=10090 GN=Sepsecs PE=1 SV=2	17479.5	12655.7	11106.5	23641.2	16718.4	4145.19	18017.6	5039.29	-0.696363	0.164079	0.292841	3	0.320874	1	36.1884	35.3957	34.7964	36.3268	36.2671	33.7593	-0.00102096
Q6P8X1	Snx6	Sorting nexin-6 OS=Mus musculus OX=10090 GN=Snx6 PE=1 SV=2	15388	12767.3	14438.9	15131.8	17461.9	23668.1	18161.2	25520.2	0.488123	0.016938	0.0789619	5	-0.797701	0.941912	48.9514	53.1941	49.745	51.4619	42.8667	50.7817	-0.0698328
Q6P9Q6	Fkbp15	FK506-binding protein 15 OS=Mus musculus OX=10090 GN=Fkbp15 PE=1 SV=2	2210.12	1788.52	2128.98	1636.77	2193.01	5426.58	2299.35	4342.71	0.695444	0.0376438	0.119445	1	-0.572623	0.762112	46.9255	47.0124	44.2954	48.5847	50.2572	49.6534	0.103718
Q6PA06	Atl2	Atlastin-2 OS=Mus musculus OX=10090 GN=Atl2 PE=1 SV=1	12665.6	17234.2	14340	12678.6	16481	21210.9	20459	20793.3	0.613204	0.0242353	0.0976741	5	-0.685229	0.887868	73.586	78.6262	84.147	77.1798	84.491	89.1258	0.0851703
Q6PAV2	Herc4	Probable E3 ubiquitin-protein ligase HERC4 OS=Mus musculus OX=10090 GN=Herc4 PE=1 SV=2	976.22	904.031	1350.57	737.82	907.733	1662.25	1983.08	1368.22	0.682855	0.0855756	0.194623	1	-0.493026	0.97851	39.6324	42.8636	43.9411	45.7074	40.7657	43.039	0.0344745
Q6PB66	Lrpprc	"Leucine-rich PPR motif-containing protein, mitochondrial OS=Mus musculus OX=10090 GN=Lrpprc PE=1 SV=2"	14315.7	12213.9	13957.6	10442.1	9437.81	7954.03	10676.6	5060.89	-0.591648	0.0290213	0.10676	5	0.849533	0.811395	44.9807	50.4144	42.102	40.4456	41.3095	44.7898	-0.117135
Q6PD03	Ppp2r5a	Serine/threonine-protein phosphatase 2A 56 kDa regulatory subunit alpha isoform OS=Mus musculus OX=10090 GN=Ppp2r5a PE=1 SV=1	51298.1	56118.1	47118.2	47169.9	55596.5	56897.2	49846	50953.8	0.113705	0.592333	0.709713	9	-0.102448	0.857648	504.934	620.646	422.498	462.692	524.908	410.897	-0.135972
Q6PDH0	Phldb1	Pleckstrin homology-like domain family B member 1 OS=Mus musculus OX=10090 GN=Phldb1 PE=1 SV=1	27711.3	31436.3	29362	22543.1	24356.2	32412.5	23708.8	30719.2	-0.0604963	0.995683	0.996834	7	0.145179	0.513838	200.041	196.556	186.138	247.213	278.993	232.561	0.37733
Q6PDL0	Dync1li2	Cytoplasmic dynein 1 light intermediate chain 2 OS=Mus musculus OX=10090 GN=Dync1li2 PE=1 SV=2	3783.12	12710.4	12531.3	8062.19	10216.4	15785.6	13661.2	17442.7	0.546954	0.092003	0.202337	3	-0.630013	0.69803	109.14	108.933	104.528	114.781	112.224	121.653	0.111508
Q6PDM2	Srsf1	Serine/arginine-rich splicing factor 1 OS=Mus musculus OX=10090 GN=Srsf1 PE=1 SV=3	35876.1	30713.9	29247.8	27798.3	26554.6	52099.2	29166.8	45236.4	0.277297	0.3285	0.470254	7	-0.330664	0.815168	160.536	137.622	167.208	144.657	157.433	122.684	-0.134311
Q6PDY2	Ado	2-aminoethanethiol dioxygenase OS=Mus musculus OX=10090 GN=Ado PE=1 SV=2	628.983	726.953	1076.92	998.578	250.903	1309.68	805.873	2040.44	0.26998	0.954653	0.971517	1	-0.39826	0.901467	19.5155	19.6095	19.8648	17.9794	16.8391	20.6278	-0.0945469
Q6PGF7	Exoc8	Exocyst complex component 8 OS=Mus musculus OX=10090 GN=Exoc8 PE=1 SV=1	1488.7	1644.99	2267.97	2258.56	2552.73	3289.07	3388.07	3414.02	0.792331	0.00612134	0.0468277	2	-0.924316	0.939192	24.7828	26.8284	24.9938	24.7981	25.8857	23.1763	-0.0532135
Q6PHN9	Rab35	Ras-related protein Rab-35 OS=Mus musculus OX=10090 GN=Rab35 PE=1 SV=1	11314.4	18552.6	11171.6	10939.4	11387.5	3242.59	10487.2	10397.6	-0.106564	0.143784	0.266207	3	0.57814	0.955768	56.1027	57.6333	55.5996	59.7192	56.5602	57.3766	0.0361327
Q6PHU5	Sort1	Sortilin OS=Mus musculus OX=10090 GN=Sort1 PE=1 SV=1	5152.02	3729.61	6226.02	8109.05	10856.6	9531.85	9258.59	7922.74	0.730051	0.0166387	0.0789619	1	-0.880282	0.992257	505.906	554.473	439.825	490.361	540.999	546.998	0.0780296
Q6PHZ2	Camk2d	Calcium/calmodulin-dependent protein kinase type II subunit delta OS=Mus musculus OX=10090 GN=Camk2d PE=1 SV=1	16660.6	26318.2	19362.3	12091.3	10453.7	13453.2	20742.3	5348.26	-0.598868	0.13783	0.259942	4	0.680949	0.942894	100.307	96.9847	90.8789	95.7834	106.218	100.059	0.0678173
Q6PIE5	Atp1a2	Sodium/potassium-transporting ATPase subunit alpha-2 OS=Mus musculus OX=10090 GN=Atp1a2 PE=1 SV=1	228224	221694	213266	206437	191695	310081	287809	240584	0.275215	0.269052	0.410808	23	-0.355387	1	912.275	886.605	662.535	734.375	1029.37	751.791	0.0282599
Q6Q477	Atp2b4	Plasma membrane calcium-transporting ATPase 4 OS=Mus musculus OX=10090 GN=Atp2b4 PE=1 SV=1	195425	226955	201247	201389	288031	393006	337762	335525	0.74174	0.00175909	0.0290333	26	-0.806101	0.0770929	315.394	330.707	325.433	373.399	432.91	396.073	0.305159
Q6WVG3	Kctd12	BTB/POZ domain-containing protein KCTD12 OS=Mus musculus OX=10090 GN=Kctd12 PE=1 SV=1	181287	112076	44064.3	59215.2	83468.8	96235.5	73023	86187.7	0.0581715	0.967722	0.981312	5	0.48161	0.901467	80.9804	87.2972	70.4976	87.329	89.7806	94.1255	0.188789
Q6Y685	Tacc1	Transforming acidic coiled-coil-containing protein 1 OS=Mus musculus OX=10090 GN=Tacc1 PE=1 SV=1	2273.83	4471.85	3220.97	2649.28	3412.04	4519.36	4384.49	5917.49	0.607715	0.0636458	0.163153	2	-0.570908	0.833975	212.378	170.19	189.057	181.017	175.353	174.335	-0.101453
Q6ZQ38	Cand1	Cullin-associated NEDD8-dissociated protein 1 OS=Mus musculus OX=10090 GN=Cand1 PE=1 SV=2	23013	21294.3	21097	14105	26856.6	42695.7	27349.1	18247.8	0.354633	0.115498	0.232946	7	-0.318439	0.96566	70.1622	72.7764	70.6157	71.3465	67.8067	69.5744	-0.0331096
Q6ZQI3	Mlec	Malectin OS=Mus musculus OX=10090 GN=Mlec PE=1 SV=2	32513.2	35016	30538.6	35886.5	36298.8	44892.5	37345.7	49651.7	0.279189	0.0898878	0.199001	3	-0.728027	0.9338	240.963	273.848	231.22	259.57	236.331	311.953	0.108935
Q6ZQM8	Ugt1a7c	UDP-glucuronosyltransferase 1-7C OS=Mus musculus OX=10090 GN=Ugt1a7c PE=1 SV=1	26298.8	21170.6	15700.2	18341.1	14961.9	21127	25091.6	25833.9	0.224576	0.722434	0.80513	4	0.021267	0.945381	9.20388	10.4407	9.35351	9.28852	8.63286	8.81915	-0.115322
Q6ZWN5	Rps9	40S ribosomal protein S9 OS=Mus musculus OX=10090 GN=Rps9 PE=1 SV=3	69172.9	103142	43190.5	64687.1	49025.4	28266.6	55963.2	56410.7	-0.352838	0.123744	0.243414	8	0.642202	0.978703	325.32	310.897	290.542	303.517	306.603	294.62	-0.0333472
Q6ZWU9	Rps27	40S ribosomal protein S27 OS=Mus musculus OX=10090 GN=Rps27 PE=1 SV=3	19593.1	30790.4	15285.8	21473.3	20542.2	25203.9	18979.2	31736.1	0.149675	0.544958	0.667272	2	-0.145197	0.970977	163.069	155.711	177.888	154.767	167.962	157.838	-0.0462132
Q6ZWV3	Rpl10	60S ribosomal protein L10 OS=Mus musculus OX=10090 GN=Rpl10 PE=1 SV=3	25584.2	36097.5	18020.7	26838.5	20152.7	12966.2	35215.3	21434	-0.33434	0.393986	0.536353	3	0.377098	0.968629	234.46	233.501	233.633	223.151	219.795	240.518	-0.0388975
Q6ZWV7	Rpl35	60S ribosomal protein L35 OS=Mus musculus OX=10090 GN=Rpl35 PE=1 SV=1	19077.3	20128.8	9059.11	14692.3	5533.94	2401.55	7813.4	3766.72	-1.87458	0.00192335	0.0302833	4	0.913778	0.991671	53.9756	53.6089	55.4984	53.3144	56.0411	51.6571	-0.0190825
Q6ZWX6	Eif2s1	Eukaryotic translation initiation factor 2 subunit 1 OS=Mus musculus OX=10090 GN=Eif2s1 PE=1 SV=3	26565.1	41718.5	25292.8	33364.5	32988.7	66261.6	53139.4	68684.7	0.995054	0.022996	0.0957982	5	-0.666855	0.934938	50.6126	53.9409	43.9073	45.9242	50.9493	45.782	-0.0540802
Q6ZWY8	Tmsb10	Thymosin beta-10 OS=Mus musculus OX=10090 GN=Tmsb10 PE=1 SV=3	18930.4	13455.6	6791.59	7071.97	13090.8	21087.9	7767.57	16002.4	0.569223	0.396543	0.538143	2	-0.0341921	0.811395	50.8557	40.312	42.1695	60.4287	52.6795	55.1005	0.34024
Q6ZWY9	Hist1h2bc	Histone H2B type 1-C/E/G OS=Mus musculus OX=10090 GN=Hist1h2bc PE=1 SV=3	8.14379e+06	1.27901e+07	6.00024e+06	1.095e+07	7.11601e+06	1.21442e+07	1.43728e+07	1.35777e+07	0.443397	0.322393	0.463273	16	-0.328177	0.833975	52.3346	52.9244	44.0254	52.6443	57.5242	56.1899	0.160241
Q71LX4	Tln2	Talin-2 OS=Mus musculus OX=10090 GN=Tln2 PE=1 SV=3	48376.8	73022.8	66670.1	50918.8	71154.1	146371	141646	129697	1.21803	0.00559261	0.0451518	18	-0.707256	0.0700887	136.53	145.422	114.955	167.064	160.522	180.813	0.362381
Q71RI9	Kyat3	Kynurenine--oxoglutarate transaminase 3 OS=Mus musculus OX=10090 GN=Kyat3 PE=1 SV=1	2495.24	2725.98	2476.2	2533.35	3970.28	3730.23	3683.26	3784.72	0.579613	0.00278593	0.034173	1	-0.883418	0.676623	18.9888	20.626	19.6623	16.3634	16.1223	17.379	-0.249391
Q75N62	Gimap8	GTPase IMAP family member 8 OS=Mus musculus OX=10090 GN=Gimap8 PE=1 SV=1	39.0527	904.894	1034.79	759.477	982.044	1936.87	1022.45	1586.21	0.619362	0.117361	0.234229	1	-0.712592	0.906208	26.363	21.6632	25.5844	25.8031	29.7169	23.1568	0.0937501
Q76LS9	Mindy1	Ubiquitin carboxyl-terminal hydrolase MINDY-1 OS=Mus musculus OX=10090 GN=Mindy1 PE=1 SV=1	2419.85	3012.45	3201.19	2615.26	4431.4	3304.82	4236.03	1973.69	0.414694	0.380328	0.523102	3	-0.302263	0.657881	61.2687	57.1562	57.3037	62.3797	65.8046	62.2207	0.115991
Q76MZ3	Ppp2r1a	Serine/threonine-protein phosphatase 2A 65 kDa regulatory subunit A alpha isoform OS=Mus musculus OX=10090 GN=Ppp2r1a PE=1 SV=3	247603	215619	229247	230432	240157	251117	238693	203693	0.0589447	0.926767	0.950911	22	0.0548522	0.656548	192.869	201.866	172.522	171.479	172.609	171.144	-0.135685
Q78IK2	Atp5md	Up-regulated during skeletal muscle growth protein 5 OS=Mus musculus OX=10090 GN=Atp5md PE=1 SV=1	30495.2	27029.5	20435.6	22464	14666.6	13764.6	11141.4	10454.2	-0.992627	0.000783139	0.0218861	2	0.96236	0.519475	27.2949	28.1353	25.0276	22.8865	25.07	22.2425	-0.196918
Q78IK4	Apool	MICOS complex subunit Mic27 OS=Mus musculus OX=10090 GN=Apool PE=1 SV=1	62027.5	63167.6	57214.3	54751.8	51823.4	60444.1	48044.6	58647.9	-0.111801	0.459673	0.595822	7	0.57616	0.787749	21.5819	25.9779	22.1087	21.1325	21.2388	20.6862	-0.138964
Q78PY7	Snd1	Staphylococcal nuclease domain-containing protein 1 OS=Mus musculus OX=10090 GN=Snd1 PE=1 SV=1	128156	128311	119356	87200.5	106530	131803	151052	125589	0.0569585	0.432963	0.573643	21	-0.0589494	0.752799	75.4498	77.6513	66.4483	75.2288	75.914	92.0439	0.144405
Q78ZA7	Nap1l4	Nucleosome assembly protein 1-like 4 OS=Mus musculus OX=10090 GN=Nap1l4 PE=1 SV=1	17045	16599.9	13570.3	16621.8	17596.1	25669.9	16689.5	28843.8	0.35554	0.0776974	0.184958	4	-0.61575	0.96566	114.812	120.944	102.504	113.796	107.503	108.23	-0.0347908
Q791V5	Mtch2	Mitochondrial carrier homolog 2 OS=Mus musculus OX=10090 GN=Mtch2 PE=1 SV=1	16606	30345	8903.52	10722.6	6774.01	6983.91	17092.4	5746.33	-0.956088	0.103097	0.218153	3	0.694233	0.300094	215.458	228.854	179.997	166.828	185.685	156.846	-0.289748
Q7M6Y3	Picalm	Phosphatidylinositol-binding clathrin assembly protein OS=Mus musculus OX=10090 GN=Picalm PE=1 SV=1	13705.9	18615.5	19900.2	16717.5	24716.6	26314.4	25014	24800.2	0.497615	0.00872823	0.0562437	3	-0.876465	0.918178	207.779	220.287	224.168	226.008	239.173	215.539	0.0611219
Q7TMB8	Cyfip1	Cytoplasmic FMR1-interacting protein 1 OS=Mus musculus OX=10090 GN=Cyfip1 PE=1 SV=1	7162	4137.62	4123.4	4021.65	4373.4	4552.04	6572.74	4637.63	0.153633	0.7619	0.832518	3	0.161843	0.921316	87.5645	99.2665	77.6344	95.2513	86.0482	97.102	0.0793452
Q7TMF3	Ndufa12	NADH dehydrogenase [ubiquinone] 1 alpha subcomplex subunit 12 OS=Mus musculus OX=10090 GN=Ndufa12 PE=1 SV=2	14060.1	22766.4	4154.03	16027.9	8750.84	6362.74	8357.06	2773.99	-1.04171	0.108893	0.225513	3	0.700984	0.211089	34.3044	37.0345	34.3409	27.7542	30.3349	26.3473	-0.325285
Q7TMK9	Syncrip	Heterogeneous nuclear ribonucleoprotein Q OS=Mus musculus OX=10090 GN=Syncrip PE=1 SV=2	28078.6	50217.7	38107.5	45888.9	46799.1	53080.8	51013.1	69836.2	0.31542	0.0768195	0.184598	6	-0.716149	0.027541	89.7119	98.7479	89.9341	75.8988	77.3971	71.8116	-0.305781
Q7TMM9	Tubb2a	Tubulin beta-2A chain OS=Mus musculus OX=10090 GN=Tubb2a PE=1 SV=1	343907	365606	319471	392737	451388	971278	767473	1.0386e+06	1.28385	0.00274145	0.0339486	5	-0.7733	1	36.4518	41.6189	31.1184	39.1055	30.1866	40.9963	0.011925
Q7TMY8	Huwe1	E3 ubiquitin-protein ligase HUWE1 OS=Mus musculus OX=10090 GN=Huwe1 PE=1 SV=5	2298.52	3451.76	3336.15	2511.61	3397.33	5784.88	3335.86	4170.9	0.378983	0.0618908	0.160085	1	-0.547395	0.992257	289.868	314.9	297.409	273.325	348.277	266.606	-0.032392
Q7TNC4	Luc7l2	Putative RNA-binding protein Luc7-like 2 OS=Mus musculus OX=10090 GN=Luc7l2 PE=1 SV=1	2724.11	6043.92	2161.3	3706.8	1111.4	514.177	2083.25	599.054	-1.96141	0.00419579	0.0400333	1	0.778453	0.866553	134.909	122.769	160.847	122.565	148.806	108.774	-0.141767
Q7TNG5	Eml2	Echinoderm microtubule-associated protein-like 2 OS=Mus musculus OX=10090 GN=Eml2 PE=1 SV=1	17219.3	13524.6	21015.6	19652.9	17088.1	11857.3	15750.8	21328.5	-0.165176	0.60141	0.715132	6	-0.0944313	0.912836	28.5307	28.5709	28.0308	25.8229	24.3285	29.9658	-0.0931538
Q7TNP2	Ppp2r1b	Serine/threonine-protein phosphatase 2A 65 kDa regulatory subunit A beta isoform OS=Mus musculus OX=10090 GN=Ppp2r1b PE=1 SV=2	14208.7	14321.8	16542.4	16726.5	26872.8	32315.8	18538.6	32772.6	0.937001	0.00491037	0.0427622	4	-0.838633	0.974877	188.959	195.871	160.054	164.995	201.603	158.227	-0.0568692
Q7TPR4	Actn1	Alpha-actinin-1 OS=Mus musculus OX=10090 GN=Actn1 PE=1 SV=1	24637.7	25233.3	30828.4	21157.9	40149.3	63991.3	51577.2	64933.7	1.20421	0.000655581	0.0208935	7	-0.821257	0.0677988	57.0954	55.3514	57.9111	71.0114	74.3568	105.389	0.53478
Q7TQD2	Tppp	Tubulin polymerization-promoting protein OS=Mus musculus OX=10090 GN=Tppp PE=1 SV=1	6474.05	5196.27	9477.63	7090.49	4969.64	14778.7	7320.67	15125.8	0.618435	0.263778	0.404896	1	-0.53376	0.988331	59.8506	72.7349	57.7761	64.4489	64.8159	66.5395	0.0480764
Q7TQI3	Otub1	Ubiquitin thioesterase OTUB1 OS=Mus musculus OX=10090 GN=Otub1 PE=1 SV=2	487.468	451.725	8124.87	1983.98	1097.84	803.079	1431.88	834.976	-0.0386541	0.619403	0.728834	2	0.151549	1	41.8609	41.9301	39.4869	40.9186	42.4959	40.9379	0.012852
Q7TSF1	Dsg1b	Desmoglein-1-beta OS=Mus musculus OX=10090 GN=Dsg1b PE=1 SV=1	5087.79	908.473	2067.9	2313.52	2634.94	3952.03	1316.44	5578.93	0.561054	0.462072	0.598484	2	-0.227097
Q7TSV4	Pgm2	Phosphoglucomutase-2 OS=Mus musculus OX=10090 GN=Pgm2 PE=1 SV=1	6800.23	5002.05	5355.29	3873.81	4971.5	5579.81	6212.22	9875.52	0.185921	0.262462	0.40359	3	-0.347323	0.967784	12.1009	12.4114	12.1036	13.2891	11.6484	13.138	0.0539677
Q7TT45	Rragd	Ras-related GTP-binding protein D OS=Mus musculus OX=10090 GN=Rragd PE=1 SV=2	444.327	456.385	512.392	451.599	729.236	491.114	505.283	418.104	0.133927	0.408772	0.550857	1	-0.336044	0.828826	2.19437	2.35051	5.42234	2.52896	0.550221	1.87403	-1.14098
Q7TT50	Cdc42bpb	Serine/threonine-protein kinase MRCK beta OS=Mus musculus OX=10090 GN=Cdc42bpb PE=1 SV=2	3086.81	2081.3	1192.17	1451.05	1352.09	4207.12	2760.4	3148.1	0.762385	0.220623	0.357709	1	-0.241065	0.161898	121.052	121.234	117.672	144.421	141.49	131.263	0.211749
Q80SW1	Ahcyl1	S-adenosylhomocysteine hydrolase-like protein 1 OS=Mus musculus OX=10090 GN=Ahcyl1 PE=1 SV=1	3221.11	2961.18	2282.45	3731.35	5242.77	6336.95	7627.2	7604.08	1.16842	0.000508389	0.0197327	2	-0.861678	0.828963	133.693	126.026	141.562	126.862	119.244	128.481	-0.0984533
Q80SZ7	Gng5	Guanine nucleotide-binding protein G(I)/G(S)/G(O) subunit gamma-5 OS=Mus musculus OX=10090 GN=Gng5 PE=1 SV=2	2437	2966.52	4546.62	2786.12	18192.9	9057.09	4727.82	21678.2	2.15866	0.00338767	0.0361673	1	-0.759457	0.410384	21.4604	21.8499	18.8187	24.266	22.2522	24.6159	0.197003
Q80TM9	Nisch	Nischarin OS=Mus musculus OX=10090 GN=Nisch PE=1 SV=2	1769.5	1363.84	1231.77	987.256	193.062	662.389	2076.98	874.428	-0.768122	0.17821	0.30853	1	0.470982	0.675868	273.235	252.876	297.763	301.664	343.086	278.006	0.161297
Q80UG5	Sep.09	Septin-9 OS=Mus musculus OX=10090 GN=Sept9 PE=1 SV=1	11907.1	14386.7	10058.7	12185.4	13096.8	21599.9	20012.2	15764.1	0.560276	0.0365243	0.117605	6	-0.550545	0.00647799	63.9023	67.134	52.3096	83.2102	78.4847	89.9817	0.462939
Q80UU9	Pgrmc2	Membrane-associated progesterone receptor component 2 OS=Mus musculus OX=10090 GN=Pgrmc2 PE=1 SV=2	29705.5	30874.3	27101.4	28978.9	34477.2	44099.3	31848.3	38671.5	0.315591	0.0633649	0.162925	6	-0.658277	0.676995	133.471	142.476	122.058	117.993	119.293	108.755	-0.200171
Q80W54	Zmpste24	CAAX prenyl protease 1 homolog OS=Mus musculus OX=10090 GN=Zmpste24 PE=1 SV=2	2807.15	3902.93	5225.32	3734.81	5078.97	4779.7	4117.09	9247.73	0.367932	0.109051	0.225513	2	-0.645155	0.281454	49.0932	49.1282	43.8736	42.8104	37.7501	42.0079	-0.213441
Q80WJ7	Mtdh	Protein LYRIC OS=Mus musculus OX=10090 GN=Mtdh PE=1 SV=1	4759.71	10537.8	7284.46	7559.42	10149	35826.5	11021.2	29561.5	1.28238	0.0171731	0.0795748	2	-0.623544	0.994363	73.3429	77.8587	70.3794	76.3324	70.4762	72.084	-0.0171867
Q80WQ2	Vac14	Protein VAC14 homolog OS=Mus musculus OX=10090 GN=Vac14 PE=1 SV=1	12096	14040.3	11033.6	8319.31	5478.92	14371	11389.3	5577.56	-0.535526	0.275432	0.417972	4	0.553571	0.847219	44.7579	55.227	37.8503	40.2288	46.3766	37.4945	-0.139838
Q80WW9	Ddrgk1	DDRGK domain-containing protein 1 OS=Mus musculus OX=10090 GN=Ddrgk1 PE=1 SV=2	6545.63	5830.19	5359.46	5241.26	6490.05	13426.3	5434.48	9215.86	0.468359	0.107846	0.224365	2	-0.451303	0.925539	109.849	104.307	98.5219	106.957	118.824	100.545	0.0596086
Q80X50	Ubap2l	Ubiquitin-associated protein 2-like OS=Mus musculus OX=10090 GN=Ubap2l PE=1 SV=1	2934.8	4631.88	1418.9	2867.94	3083.91	3196.67	3738.6	3400.67	0.184554	0.391601	0.533934	3	-0.00707092	0.948721	94.5132	96.5905	98.9943	102.366	101.151	95.5262	0.0434151
Q80X90	Flnb	Filamin-B OS=Mus musculus OX=10090 GN=Flnb PE=1 SV=3	38058.7	35707.9	41200.9	43216	51754.2	78633.5	75172.1	103360	0.957221	0.00271997	0.0339486	19	-0.82873	0.0104317	95.6072	86.6127	91.9587	127.591	120.455	134.434	0.480008
Q80XI3	Eif4g3	Eukaryotic translation initiation factor 4 gamma 3 OS=Mus musculus OX=10090 GN=Eif4g3 PE=1 SV=2	1884.76	2097.38	947.263	832.461	1989.41	1745.36	1674.78	2459.26	0.479824	0.13195	0.252115	2	-0.236825	0.793983	116.555	117.895	121.906	131.375	131.355	120.797	0.105156
Q80XL6	Acad11	Acyl-CoA dehydrogenase family member 11 OS=Mus musculus OX=10090 GN=Acad11 PE=1 SV=2	42260.9	39770.7	40758.2	21091.6	27785.6	37088.6	30236.6	31868.4	-0.375185	0.604248	0.716743	6	0.562869	0.062287	106.891	121.546	98.8087	143.416	151.772	133.267	0.392027
Q80XU3	Nucks1	Nuclear ubiquitous casein and cyclin-dependent kinase substrate 1 OS=Mus musculus OX=10090 GN=Nucks1 PE=1 SV=1	5386.78	4879.61	4266.44	4648.81	1864.16	1277.81	4770.43	7113.83	-0.675492	0.215701	0.352318	2	0.217053	0.381998	94.1485	94.3709	87.6901	82.5796	83.2304	81.4608	-0.158898
Q80Y14	Glrx5	"Glutaredoxin-related protein 5, mitochondrial OS=Mus musculus OX=10090 GN=Glrx5 PE=1 SV=2"	7772.87	7133.39	9028.96	8454.14	9899.88	14039.1	7549.82	9543.23	0.261892	0.180212	0.310754	2	-0.530097	0.987589	58.9795	56.7206	48.4459	54.6545	54.5581	51.4431	-0.0264492
Q811D0	Dlg1	Disks large homolog 1 OS=Mus musculus OX=10090 GN=Dlg1 PE=1 SV=1	3418.06	3211.68	2676.4	2307.08	3148.32	5367.3	5008.95	3921.44	0.596133	0.0328483	0.112502	2	-0.487567	0.935937	65.7661	65.7442	65.1154	61.8673	60.8858	64.4579	-0.0711889
Q8BFR5	Tufm	"Elongation factor Tu, mitochondrial OS=Mus musculus OX=10090 GN=Tufm PE=1 SV=1"	197404	226035	218804	204631	226109	223467	210339	189400	0.0350575	0.985656	0.991952	17	0.0898035	0.750777	31.9544	34.2963	26.9172	26.2564	30.9281	27.4951	-0.133945
Q8BFS6	Cpped1	Serine/threonine-protein phosphatase CPPED1 OS=Mus musculus OX=10090 GN=Cpped1 PE=1 SV=1	1048.59	911.583	1735.17	1848.33	2118.67	3697.38	1105.67	3140.37	0.935283	0.0886863	0.198058	1	-0.694374	0.936727	56.4674	56.2434	53.6762	52.5852	53.3716	54.9643	-0.048053
Q8BFW7	Lpp	Lipoma-preferred partner homolog OS=Mus musculus OX=10090 GN=Lpp PE=1 SV=1	6146.73	40542.9	24436.4	29809.3	24739.5	67198.5	57692.8	70929.3	1.20601	0.0581204	0.154238	5	-0.683103	0.965045	83.5938	91.6949	74.1756	83.1116	87.7043	86.6745	0.0507079
Q8BFY9	Tnpo1	Transportin-1 OS=Mus musculus OX=10090 GN=Tnpo1 PE=1 SV=2	8223.92	7865.08	8796.08	7013.5	8734.71	11598.9	11309.5	8893.73	0.318484	0.0817008	0.190163	2	-0.536476	0.801698	85.2347	102.274	96.7841	89.5362	84.7876	85.7018	-0.124978
Q8BFZ3	Actbl2	Beta-actin-like protein 2 OS=Mus musculus OX=10090 GN=Actbl2 PE=1 SV=1	3576.01	779.487	5013.76	8124.6	13048.1	12852.6	5777.69	5176.71	1.02512	0.0817493	0.190163	1	-0.664101
Q8BFZ9	Erlin2	Erlin-2 OS=Mus musculus OX=10090 GN=Erlin2 PE=1 SV=1	24632.1	40309.4	20437	41551	34774.7	56476	49597.2	60780	0.748119	0.0412778	0.12572	6	-0.693763	1	68.6631	73.1083	72.7078	74.7755	64.3462	73.8737	-0.0127326
Q8BG05	Hnrnpa3	Heterogeneous nuclear ribonucleoprotein A3 OS=Mus musculus OX=10090 GN=Hnrnpa3 PE=1 SV=1	111156	130029	125243	113153	82162.1	85336.3	117555	100711	-0.360775	0.0930103	0.204034	9	0.682155	0.344983	125.651	120.882	116.777	105.085	104.191	103.677	-0.214629
Q8BG32	Psmd11	26S proteasome non-ATPase regulatory subunit 11 OS=Mus musculus OX=10090 GN=Psmd11 PE=1 SV=3	35924.8	28273.9	26365.3	29091.7	27217.9	36564.7	26221.5	37069.3	0.137464	0.693846	0.785392	5	-0.125955	0.991671	56.2445	59.0439	50.3693	54.0041	59.4769	54.5169	0.0220189
Q8BG81	Poldip3	Polymerase delta-interacting protein 3 OS=Mus musculus OX=10090 GN=Poldip3 PE=1 SV=1	671.326	319.658	525.535	101.764	427.715	20.1756	1196.6	923.09	0.616402	0.958376	0.974487	1	-0.222105	0.943433	56.204	55.1855	55.0934	52.2108	54.7558	54.6531	-0.0430603
Q8BGD9	Eif4b	Eukaryotic translation initiation factor 4B OS=Mus musculus OX=10090 GN=Eif4b PE=1 SV=1	2262.18	6202.89	4859.54	4777.62	4815.5	12245.9	5071.8	10289.4	0.584237	0.0829531	0.19112	2	-0.583377	1	182.436	183.902	180.435	187.658	170.953	192.369	0.00925784
Q8BGQ7	Aars	"Alanine--tRNA ligase, cytoplasmic OS=Mus musculus OX=10090 GN=Aars PE=1 SV=1"	46248.8	38338.4	39055.9	30599.4	37280.2	53997.4	40562	39687.4	0.0522389	0.453387	0.592102	10	-0.0635601	0.800218	94.7968	98.3538	79.2878	81.9686	84.8123	81.0328	-0.130689
Q8BGT5	Gpt2	Alanine aminotransferase 2 OS=Mus musculus OX=10090 GN=Gpt2 PE=1 SV=1	27955.9	37289.2	41647.7	38729.7	25784.5	34814.1	32053.2	21723.9	-0.402612	0.130004	0.250887	8	0.479053	0.528362	305.953	282.519	246.877	222.816	233.068	211.959	-0.318354
Q8BH43	Wasf2	Wiskott-Aldrich syndrome protein family member 2 OS=Mus musculus OX=10090 GN=Wasf2 PE=1 SV=1	3431.78	5105.19	5045.36	5692.05	6642.07	10347.9	10455.3	11863.3	1.03526	0.00254589	0.0329256	3	-0.861246	0.507696	119.897	120.903	116.035	136.065	133.976	131.808	0.1715
Q8BH61	F13a1	Coagulation factor XIII A chain OS=Mus musculus OX=10090 GN=F13a1 PE=1 SV=3	190451	135195	139032	162562	144376	221047	188641	253675	0.441797	0.148751	0.271639	14	-0.542902	0.991671	160.293	183.923	120.709	160.778	116.031	157.021	-0.0936046
Q8BH64	Ehd2	EH domain-containing protein 2 OS=Mus musculus OX=10090 GN=Ehd2 PE=1 SV=1	2.9223e+06	3.0114e+06	2.87773e+06	3.21447e+06	3.88902e+06	3.91683e+06	3.46594e+06	3.7832e+06	0.370737	0.0482286	0.139533	38	-0.900341	0.921316	1102.44	1095.85	947.115	1152.19	1209.21	1132.82	0.154666
Q8BH86	Dglucy	"D-glutamate cyclase, mitochondrial OS=Mus musculus OX=10090 GN=Dglucy PE=1 SV=1"	2725.79	4570.32	3350.15	2525.7	1582.52	2552.2	3291	2699.46	-0.203246	0.199753	0.3341	2	0.576959	0.986468	16.1121	16.166	15.5118	15.7525	15.6774	15.5697	-0.0238221
Q8BH95	Echs1	"Enoyl-CoA hydratase, mitochondrial OS=Mus musculus OX=10090 GN=Echs1 PE=1 SV=1"	524843	433479	475519	425892	451638	436510	390280	349815	-0.137471	0.261402	0.402675	13	0.701179	0.644718	250.748	281.129	221.856	220.431	245.378	198.108	-0.181826
Q8BHG2	Czib	CXXC motif containing zinc binding protein OS=Mus musculus OX=10090 GN=Czib PE=1 SV=1	4678.67	4097.27	4341.39	4460.95	2988.73	3407.17	4003.94	5621.8	-0.252757	0.438979	0.579686	2	0.12468	0.991671	38.8018	38.2169	38.4239	37.3318	39.7275	36.658	-0.022555
Q8BHN3	Ganab	Neutral alpha-glucosidase AB OS=Mus musculus OX=10090 GN=Ganab PE=1 SV=1	103878	88246.5	164687	173506	128332	147825	111564	150901	0.0745797	0.787051	0.852474	16	-0.409592	0.994363	156.221	156.478	157.979	150.766	157.976	157.663	-0.0134734
Q8BIJ6	Iars2	"Isoleucine--tRNA ligase, mitochondrial OS=Mus musculus OX=10090 GN=Iars2 PE=1 SV=1"	27319.4	21178.2	27224.4	18303.4	19790.1	15569.7	16787.9	12218.7	-0.570658	0.0329346	0.112575	4	0.801774	0.905037	125.347	131.648	111.817	112.436	126.956	111.362	-0.0716889
Q8BJ56	Pnpla2	Patatin-like phospholipase domain-containing protein 2 OS=Mus musculus OX=10090 GN=Pnpla2 PE=1 SV=1	116995	118890	150920	130580	166802	132765	162128	113164	0.235727	0.466956	0.601662	12	-0.382549	0.691601	1418.34	1386.04	1139.3	1541.4	1622.19	1340.4	0.193844
Q8BJ64	Chdh	"Choline dehydrogenase, mitochondrial OS=Mus musculus OX=10090 GN=Chdh PE=1 SV=1"	21317.2	13514.9	23325.6	23049.5	32403.9	33762.9	13864.1	21459.7	0.250519	0.431025	0.571949	7	-0.425552	0.976381	80.1093	63.2964	87.2683	72.1544	90.8187	76.1499	0.0577898
Q8BJ71	Nup93	Nuclear pore complex protein Nup93 OS=Mus musculus OX=10090 GN=Nup93 PE=1 SV=1	6497.44	4959.31	3589.64	2152.65	4595.86	9691.77	3813.96	6610.27	0.385533	0.21092	0.347788	2	-0.197734	0.947981	19.5155	23.0945	22.1256	23.5762	22.3511	21.8534	0.0692158
Q8BJD1	Itih5	Inter-alpha-trypsin inhibitor heavy chain H5 OS=Mus musculus OX=10090 GN=Itih5 PE=1 SV=1	1626.46	2577.71	2909.78	1878.53	5798.71	11415.8	7150.54	7812.6	1.76408	0.000102018	0.0156936	2	-0.792624	0.0052334	396.185	490.125	363.952	711.14	649.139	736.909	0.755692
Q8BJF9	Chmp2b	Charged multivesicular body protein 2b OS=Mus musculus OX=10090 GN=Chmp2b PE=1 SV=1	9048.25	5265.83	7975.34	7208.27	10672.5	23455.1	13061.4	25146.3	1.20693	0.00442193	0.0403896	4	-0.738337	0.908381	41.3341	39.2334	39.3856	38.5734	36.0199	37.942	-0.0922962
Q8BJU0	Sgta	Small glutamine-rich tetratricopeptide repeat-containing protein alpha OS=Mus musculus OX=10090 GN=Sgta PE=1 SV=2	23242.3	18928.3	24723.7	22327.1	20394.7	15779.1	14047.8	20993.8	-0.34467	0.111426	0.228252	6	0.453684	0.876645	124.921	118.621	97.3915	103.784	114.745	97.8412	-0.102901
Q8BJW6	Eif2a	Eukaryotic translation initiation factor 2A OS=Mus musculus OX=10090 GN=Eif2a PE=1 SV=2	8417.29	20626.6	15590.1	19233.7	16538	30853.5	22035.9	41203.9	0.59051	0.0621563	0.160532	4	-0.686949	0.98805	43.5018	42.905	39.5206	40.6229	42.4959	40.7045	-0.0233408
Q8BK64	Ahsa1	Activator of 90 kDa heat shock protein ATPase homolog 1 OS=Mus musculus OX=10090 GN=Ahsa1 PE=1 SV=2	12345.6	10558.2	10923.5	9660.49	8978.71	7853.68	8448.57	7660.05	-0.398789	0.029769	0.107479	3	0.92543	0.979435	50.8962	57.3014	45.8813	53.0385	51.6661	53.4858	0.0437925
Q8BKC5	Ipo5	Importin-5 OS=Mus musculus OX=10090 GN=Ipo5 PE=1 SV=3	5157.61	3740.24	4507.66	3991.56	3686.16	7357.08	4945.83	5724.16	0.326972	0.255803	0.396163	2	-0.373622	0.934566	96.3162	99.9718	83.2865	97.1235	99.1485	95.3122	0.0648963
Q8BKZ9	Pdhx	"Pyruvate dehydrogenase protein X component, mitochondrial OS=Mus musculus OX=10090 GN=Pdhx PE=1 SV=1"	89838.5	88588.1	90776.2	81174.7	79913.9	85262	52964.9	71412.4	-0.239914	0.148281	0.271066	6	0.63331	0.530692	45.3859	57.0732	36.4162	39.4208	40.8398	33.8761	-0.263478
Q8BL66	Eea1	Early endosome antigen 1 OS=Mus musculus OX=10090 GN=Eea1 PE=1 SV=2	11916.6	10002.4	12672.8	18803.6	25304.7	29808.5	20678.4	24933.7	1.0314	0.00273985	0.0339486	9	-0.913201	0.911052	52.5777	59.521	53.6424	50.2006	56.6838	51.9489	-0.061163
Q8BL97	Srsf7	Serine/arginine-rich splicing factor 7 OS=Mus musculus OX=10090 GN=Srsf7 PE=1 SV=1	4525.22	4334.31	2744.81	7744.33	6068.36	3147.62	10486.3	7613.38	0.618028	0.296854	0.439324	3	-0.475904	0.758048	60.823	53.4845	73.2814	55.8763	60.0454	53.1162	-0.139915
Q8BLY1	Smoc1	SPARC-related modular calcium-binding protein 1 OS=Mus musculus OX=10090 GN=Smoc1 PE=2 SV=2	1848.19	2375.44	2556.79	1545.45	2537.03	3010.61	1679.9	3280.63	0.399445	0.257082	0.397789	1	-0.435026	1	274.41	241.114	242.389	255.254	257.168	251.665	0.0142573
Q8BMA6	Srp68	Signal recognition particle subunit SRP68 OS=Mus musculus OX=10090 GN=Srp68 PE=1 SV=2	1495.92	1603.97	2024.54	728.652	2247.11	1238.05	1912.72	2648.67	0.420508	0.197354	0.332712	2	-0.416016	0.968927	61.1066	60.9731	50.3355	61.4929	59.6746	56.9876	0.0523682
Q8BMD8	Slc25a24	Calcium-binding mitochondrial carrier protein SCaMC-1 OS=Mus musculus OX=10090 GN=Slc25a24 PE=1 SV=1	2855.49	2420.48	1922.84	4056.01	3321.48	2702.9	5222.94	5083.03	0.64424	0.112117	0.229397	2	-0.634712	0.945905	26.6466	26.2891	24.2852	30.8285	26.4542	30.2576	0.178855
Q8BMF4	Dlat	"Dihydrolipoyllysine-residue acetyltransferase component of pyruvate dehydrogenase complex, mitochondrial OS=Mus musculus OX=10090 GN=Dlat PE=1 SV=2"	335216	263407	268858	271599	263292	332244	209029	243940	-0.0925669	0.50176	0.633783	11	0.387564	0.700654	105.919	121.089	80.1483	82.8752	88.347	79.4376	-0.273872
Q8BMG7	Rab3gap2	Rab3 GTPase-activating protein non-catalytic subunit OS=Mus musculus OX=10090 GN=Rab3gap2 PE=1 SV=2	5067.94	4813.73	5880.7	3367.25	5400.69	5028	7355.42	3486.69	0.0772861	0.635752	0.740927	3	-0.0115999	0.652255	58.9187	64.1469	59.1596	64.5081	69.6852	64.7303	0.126685
Q8BMJ2	Lars	"Leucine--tRNA ligase, cytoplasmic OS=Mus musculus OX=10090 GN=Lars PE=1 SV=2"	5026.61	7335.98	4489.8	6753.87	9335.62	17772.5	12779.6	22114.2	1.37103	0.00166292	0.0286013	3	-0.781718	0.977502	56.123	58.0274	50.673	54.418	56.7579	57.6295	0.0363903
Q8BMJ3	Eif1ax	"Eukaryotic translation initiation factor 1A, X-chromosomal OS=Mus musculus OX=10090 GN=Eif1ax PE=2 SV=3"	6856.51	11363.8	6571.71	9590.06	5473.93	10099.5	9019.21	23721.6	0.235097	0.472348	0.606804	3	-0.398901	0.522088	62.1601	67.7149	62.0447	55.7778	56.0658	59.6333	-0.161946
Q8BMK4	Ckap4	Cytoskeleton-associated protein 4 OS=Mus musculus OX=10090 GN=Ckap4 PE=1 SV=2	3526.04	2579.91	3662.29	4609.25	4746.32	11697.6	7537.79	10933.7	1.33703	0.004216	0.0400333	4	-0.782476	0.555126	27.8013	26.8907	27.1534	33.686	27.0969	38.8174	0.267861
Q8BML9	Qars	Glutamine--tRNA ligase OS=Mus musculus OX=10090 GN=Qars PE=1 SV=1	1264.01	4137	3843.14	2821.25	3366.2	4526.21	6512.03	5591.56	0.611466	0.0672426	0.169624	3	-0.638158	0.970977	64.7329	67.4452	64.508	65.4146	63.3822	63.3491	-0.0335598
Q8BMP6	Acbd3	Golgi resident protein GCP60 OS=Mus musculus OX=10090 GN=Acbd3 PE=1 SV=3	2800.4	2624.64	2117.16	2095.11	1537.14	796.482	1700.62	1531.24	-0.61965	0.0119708	0.0658066	2	0.878345	0.999926	37.4445	40.8099	37.9178	38.9281	37.849	40.4516	0.0135725
Q8BMS1	Hadha	"Trifunctional enzyme subunit alpha, mitochondrial OS=Mus musculus OX=10090 GN=Hadha PE=1 SV=1"	838664	684605	614907	508582	585304	569357	665559	453181	-0.168559	0.339978	0.482936	26	0.717403	0.991317	176.196	203.256	147.248	172.76	187.835	176.436	0.0395483
Q8BP47	Nars	"Asparagine--tRNA ligase, cytoplasmic OS=Mus musculus OX=10090 GN=Nars PE=1 SV=2"	1697.95	3835.73	5266.22	4309.69	3297.57	6821.31	4327.9	4704.93	0.150379	0.305659	0.448524	1	-0.484664	0.971087	93.3584	98.8309	84.7881	90.6201	88.1492	91.8688	-0.0307503
Q8BP67	Rpl24	60S ribosomal protein L24 OS=Mus musculus OX=10090 GN=Rpl24 PE=1 SV=2	43937.8	59968.3	29723.5	35065.4	40969.8	48593.6	39183	59531	0.184907	0.475292	0.609682	5	-0.0518906
Q8BPB5	Efemp1	EGF-containing fibulin-like extracellular matrix protein 1 OS=Mus musculus OX=10090 GN=Efemp1 PE=1 SV=1	9460.24	7337.69	9218.28	6946.7	3113.53	7690.64	6921.5	11392.7	-0.172818	0.422111	0.563574	3	0.165235	0.819924	187.582	196.162	169.401	229.654	174.784	224.565	0.17739
Q8BRF7	Scfd1	Sec1 family domain-containing protein 1 OS=Mus musculus OX=10090 GN=Scfd1 PE=1 SV=1	19976.1	20677.3	24481	19308.2	27603.8	45453.7	31669.4	41205.4	0.829801	0.00470212	0.042004	5	-0.771317	0.871735	48.2626	58.2556	47.7541	47.0475	47.909	49.8284	-0.0858477
Q8BRT1	Clasp2	CLIP-associating protein 2 OS=Mus musculus OX=10090 GN=Clasp2 PE=1 SV=1	1472.96	2247.02	1013.87	1389.86	1573.96	1482.12	3485.3	3774.49	0.711009	0.112507	0.229459	2	-0.472455	0.991184	46.8242	50.3729	50.2512	48.3088	51.765	50.9373	0.0346412
Q8BSY0	Asph	Aspartyl/asparaginyl beta-hydroxylase OS=Mus musculus OX=10090 GN=Asph PE=1 SV=1	265202	258039	242274	239543	236410	397834	284968	410333	0.429372	0.117248	0.234229	24	-0.557513	0.818083	232.515	200.746	192.617	216.983	244.389	216.006	0.116464
Q8BTI8	Srrm2	Serine/arginine repetitive matrix protein 2 OS=Mus musculus OX=10090 GN=Srrm2 PE=1 SV=3	361.824	987.933	57.8745	321.523	284.406	1057.34	1111.55	651.111	1.28253	0.159178	0.286026	1	-0.221868	0.873803	325.827	298.637	400.193	347.109	478.983	318.859	0.148364
Q8BTM8	Flna	Filamin-A OS=Mus musculus OX=10090 GN=Flna PE=1 SV=5	170795	371354	346354	500519	208583	415486	463874	729778	0.291744	0.439161	0.579686	63	-0.524613	0.461776	543.283	553.166	560.156	671.982	641.081	940.438	0.422338
Q8BTZ7	Gmppb	Mannose-1-phosphate guanyltransferase beta OS=Mus musculus OX=10090 GN=Gmppb PE=1 SV=1	3470.27	3455.9	3562.23	5255.89	4349	2466.63	5539.2	3881.08	0.224654	0.972687	0.984043	2	-0.232109	0.96293	12.0604	13.3448	10.5514	12.2446	11.6484	14.0329	0.079032
Q8BU14	Sec62	Translocation protein SEC62 OS=Mus musculus OX=10090 GN=Sec62 PE=1 SV=1	11893.8	13143.2	9894.38	9624.88	5585.28	6128.9	9488.16	12318	-0.508494	0.121578	0.240245	3	0.555196	0.947512	122.713	114.513	118.346	126.33	116.871	123.443	0.0440427
Q8BU33	Ilvbl	Acetolactate synthase-like protein OS=Mus musculus OX=10090 GN=Ilvbl PE=1 SV=1	12812.4	14140.2	6205.7	10827.2	6416.43	5838.83	16100.8	8500.95	-0.673329	0.431764	0.572492	3	0.388908	0.598083	23.5673	23.6339	22.1762	23.8718	25.5397	33.2924	0.238863
Q8BUE4	Aifm2	Apoptosis-inducing factor 2 OS=Mus musculus OX=10090 GN=Aifm2 PE=1 SV=1	39533.6	31005.3	30887.7	27431	26704.5	19870.2	23589.8	22288.3	-0.432549	0.0271647	0.103012	6	0.870622	0.866671	230.206	244.495	179.356	222.619	276.695	220.169	0.141976
Q8BUK6	Hook3	Protein Hook homolog 3 OS=Mus musculus OX=10090 GN=Hook3 PE=1 SV=2	10868.6	13584.5	17410.3	13039.7	20723.6	30564.5	19680.1	29595.6	0.895886	0.00435014	0.0402806	6	-0.821511	0.996121	87.605	95.823	84.0964	91.7434	91.2389	87.1609	0.0158355
Q8BUN5	Smad3	Mothers against decapentaplegic homolog 3 OS=Mus musculus OX=10090 GN=Smad3 PE=1 SV=2	1008.76	1297.87	1151.93	1489.7	1924.43	1666.35	1910.14	2086.81	0.648958	0.00656834	0.0482981	1	-0.935608	0.833975	28.0647	30.6038	28.2164	29.4884	32.6336	31.0941	0.101381
Q8BUV3	Gphn	Gephyrin OS=Mus musculus OX=10090 GN=Gphn PE=1 SV=2	15334.2	14067.7	21025	14393.7	16341.7	30517.9	16463.5	26766.6	0.498758	0.130896	0.250959	5	-0.557698	0.835323	43.8867	45.6018	40.4486	38.9478	40.296	40.5488	-0.115707
Q8BVE3	Atp6v1h	V-type proton ATPase subunit H OS=Mus musculus OX=10090 GN=Atp6v1h PE=1 SV=1	8550.27	13898.2	7651.46	9015.09	21135	28780.1	17332.1	25560.4	1.40454	0.00072665	0.0218861	3	-0.778242	0.644718	81.5274	97.1921	78.613	77.298	76.0129	77.9591	-0.147833
Q8BVI4	Qdpr	Dihydropteridine reductase OS=Mus musculus OX=10090 GN=Qdpr PE=1 SV=2	70706.1	53598.4	44576.4	49416	67487.8	72806.2	60700.7	85153.8	0.44576	0.0751849	0.182231	6	-0.518911	0.873803	70.3446	69.3744	57.1687	61.3549	61.8745	60.4309	-0.0940858
Q8BW75	Maob	Amine oxidase [flavin-containing] B OS=Mus musculus OX=10090 GN=Maob PE=1 SV=4	97233.9	85359.7	85125.9	69253.8	63346.9	84386.2	62258.5	58927.6	-0.440804	0.110569	0.227033	7	0.813144	0.00265718	91.8188	100.698	85.5136	62.2023	65.854	64.6914	-0.525697
Q8BWF0	Aldh5a1	"Succinate-semialdehyde dehydrogenase, mitochondrial OS=Mus musculus OX=10090 GN=Aldh5a1 PE=1 SV=1"	35201.3	26975.1	30801.6	25618.4	31947.1	31546.2	23352.4	33891.2	0.139262	0.907266	0.937004	8	0.00920575	0.705298	38.741	34.4207	34.2903	33.016	35.3772	29.3238	-0.138961
Q8BWT1	Acaa2	"3-ketoacyl-CoA thiolase, mitochondrial OS=Mus musculus OX=10090 GN=Acaa2 PE=1 SV=3"	354578	374748	298155	248574	323167	349089	351856	320425	0.0468559	0.614421	0.725257	17	0.182671	0.976728	132.032	135.403	110.467	118.939	127.277	121.439	-0.0344445
Q8BWY3	Etf1	Eukaryotic peptide chain release factor subunit 1 OS=Mus musculus OX=10090 GN=Etf1 PE=1 SV=4	3246.53	2535.14	4509.69	4959.47	2333.59	3493.85	4253.43	3406.34	-0.149445	0.574376	0.693654	1	-0.0379001	0.861811	123.706	138.867	113.386	117.717	118.651	116.089	-0.0881928
Q8BX02	Kank2	KN motif and ankyrin repeat domain-containing protein 2 OS=Mus musculus OX=10090 GN=Kank2 PE=1 SV=1	7282.41	17995.1	10224.2	9796.28	9107.38	24267	13025.2	23454.4	0.804432	0.165396	0.293981	5	-0.431123	0.991317	81.7502	87.3594	68.3042	86.4225	75.2961	79.924	0.0308163
Q8BX10	Pgam5	"Serine/threonine-protein phosphatase PGAM5, mitochondrial OS=Mus musculus OX=10090 GN=Pgam5 PE=1 SV=1"	2683.48	2377.73	1483.85	2492.92	2786.08	1402.33	1641.23	1772.27	-0.513523	0.363451	0.505912	1	0.374775	0.873803	27.1936	24.92	23.6947	23.0047	24.7981	23.7794	-0.081087
Q8BX70	Vps13c	Vacuolar protein sorting-associated protein 13C OS=Mus musculus OX=10090 GN=Vps13c PE=1 SV=2	32732.9	42241.1	29437.6	25085.5	32833.5	27474.6	36477.5	26243.7	-0.0475674	0.779564	0.846482	15	0.448831	0.835542	103.569	124.284	86.7621	89.6347	109.184	78.9902	-0.17691
Q8BXZ1	Tmx3	Protein disulfide-isomerase TMX3 OS=Mus musculus OX=10090 GN=Tmx3 PE=1 SV=2	525.147	672.755	1360.46	1227.51	610.684	855.761	1687.96	1909.04	0.403336	0.423951	0.565594	1	-0.534188	0.81877	58.1691	57.2806	52.2083	52.8611	50.6774	52.1435	-0.105515
Q8BYA0	Tbcd	Tubulin-specific chaperone D OS=Mus musculus OX=10090 GN=Tbcd PE=1 SV=1	2930.42	6009.81	2064.36	1828.95	4238.68	12892.1	6409.88	8394.57	1.57648	0.0145676	0.0731758	1	-0.515206	0.886741	51.6458	51.4101	44.1941	49.905	53.0009	52.3964	0.0800368
Q8BYK6	Ythdf3	YTH domain-containing family protein 3 OS=Mus musculus OX=10090 GN=Ythdf3 PE=1 SV=2	2754.78	1454.53	818.766	2502.94	347.541	152.577	393.075	130.117	-3.05066	0.000301069	0.0156936	2	0.771127	0.787749	61.8562	63.732	70.6157	58.6353	63.7777	59.75	-0.105721
Q8BZW8	Nhlrc2	NHL repeat-containing protein 2 OS=Mus musculus OX=10090 GN=Nhlrc2 PE=1 SV=1	5926.37	8034.2	4008.6	4790.6	2215.01	2615.73	4022.53	2901.35	-0.951706	0.00754314	0.051722	2	0.873935	0.947614	17.2061	17.9915	15.4105	19.2012	17.1357	17.2233	0.0828064
Q8C025	Chpt1	Cholinephosphotransferase 1 OS=Mus musculus OX=10090 GN=Chpt1 PE=1 SV=1	20492	22622.4	15380.1	13286.2	20704	33400.4	21698.1	28412.7	0.483991	0.0531037	0.146666	1	-0.449925	0.555751	965.778	1132.61	809.17	729.034	824.09	708.72	-0.351902
Q8C0C7	Farsa	Phenylalanine--tRNA ligase alpha subunit OS=Mus musculus OX=10090 GN=Farsa PE=1 SV=1	11139.8	7712.16	23825.8	46934.4	35288.3	52726	12858.4	15659.9	0.529007	0.466363	0.601344	3	-0.399032	0.969368	23.2229	22.7834	21.417	23.1427	20.9916	21.5811	-0.0373821
Q8C0E2	Vps26b	Vacuolar protein sorting-associated protein 26B OS=Mus musculus OX=10090 GN=Vps26b PE=1 SV=1	18135.6	16318.6	17172.6	19886.4	24648.5	19061.8	19328	30241.9	0.306632	0.0987559	0.212337	5	-0.734162	0.885489	53.0437	54.6461	47.8047	54.7727	51.147	58.291	0.0789756
Q8C0N2	Gpat3	Glycerol-3-phosphate acyltransferase 3 OS=Mus musculus OX=10090 GN=Gpat3 PE=1 SV=1	49202	41367.8	36353.4	35616.5	39305.4	76021.7	51316.7	62682	0.548441	0.0786884	0.186804	4	-0.474374	0.96566	95.1412	110.385	94.7426	109.421	109.085	107.14	0.120688
Q8C129	Lnpep	Leucyl-cystinyl aminopeptidase OS=Mus musculus OX=10090 GN=Lnpep PE=1 SV=1	777.24	822.929	2958.68	2435.56	3094.99	1334.62	4162.13	4797.22	1.34208	0.0992005	0.212409	2	-0.746021	0.936727	212.824	214.002	186.948	197.985	236.677	216.239	0.0836726
Q8C166	Cpne1	Copine-1 OS=Mus musculus OX=10090 GN=Cpne1 PE=1 SV=1	6186.82	4236.41	5839.91	3680.75	3822.1	4869.32	4602.51	3326.47	-0.245999	0.308613	0.451711	1	0.58969
Q8C181	Mbnl2	Muscleblind-like protein 2 OS=Mus musculus OX=10090 GN=Mbnl2 PE=2 SV=2	71.0965	737.324	1412.64	821.931	2365.51	3489.77	3463.8	5517.28	2.15901	0.00858701	0.0561558	1	-0.879735	0.78448	127.515	133.37	128.74	141.465	146.433	143.519	0.147127
Q8C196	Cps1	"Carbamoyl-phosphate synthase [ammonia], mitochondrial OS=Mus musculus OX=10090 GN=Cps1 PE=1 SV=2"	16952.8	7193.84	3577.65	2314.88	13667	13991.8	7221.67	20868.6	1.44668	0.0771237	0.184598	4	-0.33626	0.969755	0.978852	3.67812	2.04794	1.22828	1.09401	3.52763	-0.212449
Q8C1A5	Thop1	Thimet oligopeptidase OS=Mus musculus OX=10090 GN=Thop1 PE=1 SV=1	4750.54	3627	6562.49	7927.96	7791.09	9559.76	5977.66	10812.9	0.628233	0.0697138	0.173614	6	-0.82615	0.7541	15.869	15.3777	13.6052	18.0188	17.63	15.0639	0.175807
Q8C1E7	Tmem120a	Transmembrane protein 120A OS=Mus musculus OX=10090 GN=Tmem120a PE=1 SV=1	34929.4	42273.2	39682.6	32475.3	50775	61019.9	61231.2	59894.2	0.699373	0.00339069	0.0361673	3	-0.796927	0.104954	141.675	172.182	125.787	214.578	221.402	186.182	0.509127
Q8C2Q3	Rbm14	RNA-binding protein 14 OS=Mus musculus OX=10090 GN=Rbm14 PE=1 SV=1	1702.51	7135.84	5002.01	4476.22	3679.32	6481.52	5390.63	6536.47	0.320999	0.364307	0.50629	5	-0.30276	0.192751	18.7052	19.0909	18.8356	14.5306	17.3334	13.4687	-0.329173
Q8C3X8	Lmf2	Lipase maturation factor 2 OS=Mus musculus OX=10090 GN=Lmf2 PE=1 SV=1	3471.53	1740.67	3005.88	2199.96	3337.09	3145.91	1485.17	5297.32	0.333398	0.52124	0.65033	1	-0.37378	0.802084	44.5553	42.3657	43.0131	49.8065	48.5764	44.1673	0.1321
Q8C570	Rae1	mRNA export factor OS=Mus musculus OX=10090 GN=Rae1 PE=1 SV=1	583.45	819.143	976.721	871.691	946.876	587.865	1137.67	1636.13	0.296627	0.318731	0.460684	1	-0.569662	0.742675	32.0354	29.5459	31.5402	30.1584	28.1103	27.8064	-0.11358
Q8C5P7	Tdrp	Testis development-related protein OS=Mus musculus OX=10090 GN=Tdrp PE=1 SV=1	1182.08	5691.12	3799.08	3818.79	5049.8	3582.97	4619.66	3593.43	0.0971926	0.385106	0.527997	2	-0.247677	1	69.7368	78.9581	59.8176	79.8797	62.2452	67.1426	0.00648067
Q8C650	Sep.10	Septin-10 OS=Mus musculus OX=10090 GN=Sept10 PE=1 SV=1	9285.8	11181	8714.46	9922.9	8555.69	8664.56	11251.1	10407.2	-0.0155749	0.944309	0.963773	4	0.0843404	0.994363	32.5216	36.7233	31.4727	34.021	33.3504	31.8917	-0.0182936
Q8C754	Vps52	Vacuolar protein sorting-associated protein 52 homolog OS=Mus musculus OX=10090 GN=Vps52 PE=1 SV=1	466.54	1892.34	1447.15	1718.42	2889.33	2053.53	1681.9	4720.04	0.627272	0.0535878	0.147175	1	-0.724883	0.742775	46.1152	43.8178	40.8872	47.6584	49.6393	44.926	0.121118
Q8C7X2	Emc1	ER membrane protein complex subunit 1 OS=Mus musculus OX=10090 GN=Emc1 PE=1 SV=1	2904.4	2447.08	1399.83	2743.65	1703.4	1406.4	1859.65	1935.82	-0.541854	0.141152	0.264736	1	0.597244	0.878235	45.8316	42.7806	45.8138	43.6579	56.8074	46.0543	0.115525
Q8C838	Trarg1	Trafficking regulator of GLUT4 1 OS=Mus musculus OX=10090 GN=Trarg1 PE=1 SV=1	20215.9	42490.3	22869.8	28539.8	39004.1	60964	52145.5	35434.6	0.819876	0.0282049	0.105343	4	-0.52893
Q8C8U0	Ppfibp1	Liprin-beta-1 OS=Mus musculus OX=10090 GN=Ppfibp1 PE=1 SV=3	1332.49	1616.02	1612.93	1121.88	2388.72	2924.43	3506.71	4788.14	1.12723	0.000858773	0.0218861	2	-0.794193	0.00045059	124.314	117.355	112.138	156.186	157.877	156.593	0.412983
Q8CAK1	Iba57	"Putative transferase CAF17 homolog, mitochondrial OS=Mus musculus OX=10090 GN=Iba57 PE=1 SV=1"	1155.08	1555.61	1174.41	1288.71	2228.94	2670.25	2183.43	2304.46	0.881458	0.000643203	0.0208935	1	-0.83299	0.952588	10.075	11.6023	9.38725	11.003	10.3384	10.998	0.0630616
Q8CAQ8	Immt	MICOS complex subunit Mic60 OS=Mus musculus OX=10090 GN=Immt PE=1 SV=1	506979	531995	493490	394136	505847	751868	456369	477178	-0.0258586	0.449623	0.588962	40	-0.126329	0.729277	193.295	217.964	181.431	178.159	190.826	166.962	-0.143122
Q8CAY6	Acat2	"Acetyl-CoA acetyltransferase, cytosolic OS=Mus musculus OX=10090 GN=Acat2 PE=1 SV=2"	146412	126116	137194	119810	155148	162807	100192	170163	0.27292	0.556052	0.677664	15	-0.306831	0.320505	65.523	81.0948	51.8371	44.3082	52.7537	34.6931	-0.588034
Q8CC88	Vwa8	von Willebrand factor A domain-containing protein 8 OS=Mus musculus OX=10090 GN=Vwa8 PE=1 SV=2	5601.85	4526.36	6319.75	2945.13	2921.7	1966.15	2479.08	933.837	-1.18954	0.00961287	0.0586123	3	0.849315	0.740183	90.1778	96.0927	79.0348	95.6454	100.656	93.9698	0.133857
Q8CDN6	Txnl1	Thioredoxin-like protein 1 OS=Mus musculus OX=10090 GN=Txnl1 PE=1 SV=3	15543.4	13189.2	17971.8	17396.7	16876.4	15135.7	18106	24857.6	0.0881796	0.328438	0.470254	5	-0.618721	0.929176	60.5799	62.6533	53.305	58.0638	57.104	54.8671	-0.0511103
Q8CFH6	Sik2	Serine/threonine-protein kinase SIK2 OS=Mus musculus OX=10090 GN=Sik2 PE=1 SV=1	1747.95	2889.57	2991.11	1340.91	757.538	534.615	1782.82	560.681	-1.78594	0.0103535	0.0596804	2	0.762648	0.96566	312.112	340.81	248.548	262.703	328.75	263.123	-0.0727955
Q8CFX1	H6pd	GDH/6PGL endoplasmic bifunctional protein OS=Mus musculus OX=10090 GN=H6pd PE=1 SV=2	197004	199777	202206	187702	133829	93841.8	180350	105494	-0.739532	0.0156269	0.0771552	10	0.799261	0.527607	450.337	445.111	413.623	518.168	520.212	487.293	0.221275
Q8CG76	Akr7a2	Aflatoxin B1 aldehyde reductase member 2 OS=Mus musculus OX=10090 GN=Akr7a2 PE=1 SV=3	31580.7	25313.8	33326.3	29045.9	36051.1	42621.8	31834.4	44397.9	0.372127	0.0671977	0.169624	6	-0.751662
Q8CGC7	Eprs	Bifunctional glutamate/proline--tRNA ligase OS=Mus musculus OX=10090 GN=Eprs PE=1 SV=4	102805	148994	134100	91640.4	114757	180275	169994	159930	0.489855	0.116502	0.233949	19	-0.442208	0.999179	140.257	152.122	118.802	131.296	133.827	142.411	-0.00620593
Q8CGF7	Tcerg1	Transcription elongation regulator 1 OS=Mus musculus OX=10090 GN=Tcerg1 PE=1 SV=2	5958.5	6341.57	6218.85	5299.16	9793.23	821.54	6018.38	13397.1	0.334782	0.76699	0.834921	2	-0.307226	0.97312	32.6027	31.724	36.4668	35.5779	36.7367	31.8917	0.0480798
Q8CGK3	Lonp1	"Lon protease homolog, mitochondrial OS=Mus musculus OX=10090 GN=Lonp1 PE=1 SV=2"	20791.3	16573.6	20489.5	21636.8	22213.2	16738.5	21060.4	15389.6	-0.136584	0.655914	0.75679	7	0.115263	0.989171	104.116	109.535	90.3727	101.163	110.173	100.176	0.0384826
Q8CGN5	Plin1	Perilipin-1 OS=Mus musculus OX=10090 GN=Plin1 PE=1 SV=2	4.16417e+06	1.07623e+07	4.37747e+06	7.35649e+06	5.72895e+06	8.80133e+06	1.15089e+07	1.03127e+07	0.747477	0.183881	0.314887	49	-0.369803
Q8CGU1	Calcoco1	Calcium-binding and coiled-coil domain-containing protein 1 OS=Mus musculus OX=10090 GN=Calcoco1 PE=1 SV=2	1905.93	2850.17	1959.07	1516.28	2974.06	3658.67	3042.18	4822.33	0.787882	0.00902964	0.05662	2	-0.679155	0.815149	72.8161	73.9381	74.2769	76.1944	81.9945	79.5154	0.10432
Q8CGY8	Ogt	UDP-N-acetylglucosamine--peptide N-acetylglucosaminyltransferase 110 kDa subunit OS=Mus musculus OX=10090 GN=Ogt PE=1 SV=2	485.211	175.558	1162.83	690.001	206.62	3334.35	1682.77	1820.19	1.59679	0.197596	0.332712	1	-0.5531	0.987589	205.288	179.587	257.085	211.859	251.433	196.24	0.0471075
Q8CHH9	Sep.08	Septin-8 OS=Mus musculus OX=10090 GN=Sept8 PE=1 SV=4	104.949	443.721	647.002	382.948	1043.41	2433.1	1408.16	2618.96	2.16683	0.00221218	0.0314239	1	-0.821536	0.901467	92.4468	80.5347	84.7881	96.3943	95.6139	93.2695	0.148493
Q8CHP5	Pym1	Partner of Y14 and mago OS=Mus musculus OX=10090 GN=Pym1 PE=1 SV=2	17879.8	9640.97	22014.7	21341.9	15015.5	47679.1	12601	44818.4	0.409261	0.278444	0.4207	3	-0.536642	0.947214	15.6461	16.083	15.7986	14.8854	14.837	15.9005	-0.0596619
Q8CHP8	Pgp	Glycerol-3-phosphate phosphatase OS=Mus musculus OX=10090 GN=Pgp PE=1 SV=1	10426.6	12308.1	10326.6	8815.7	12468	14852.7	11687	17013	0.391163	0.0557118	0.150637	4	-0.606872	0.994719	32.319	31.4336	29.06	32.1686	31.4719	30.2965	0.0183802
Q8CHT0	Aldh4a1	"Delta-1-pyrroline-5-carboxylate dehydrogenase, mitochondrial OS=Mus musculus OX=10090 GN=Aldh4a1 PE=1 SV=3"	147472	101190	126039	94412.1	78171	113557	73355.1	106963	-0.304554	0.168786	0.298475	10	0.584402	0.153429	36.2897	38.7148	35.3026	28.1877	33.5234	28.4484	-0.294546
Q8CHU3	Epn2	Epsin-2 OS=Mus musculus OX=10090 GN=Epn2 PE=1 SV=1	640.641	1303.03	1789.77	1417.27	1608.15	4224.38	1828.48	4852.86	1.0322	0.0268034	0.102766	1	-0.709474	0.496582	76.3006	62.9438	77.82	88.5705	94.032	88.0947	0.324378
Q8CHW4	Eif2b5	Translation initiation factor eIF-2B subunit epsilon OS=Mus musculus OX=10090 GN=Eif2b5 PE=1 SV=1	285.574	958.526	938.005	1041.24	735.414	275.856	1285.95	554.22	-0.570698	0.697878	0.788926	1	-0.00338762	0.910227	61.3497	61.948	52.2252	53.7479	57.7961	54.7503	-0.0742711
Q8CI51	Pdlim5	PDZ and LIM domain protein 5 OS=Mus musculus OX=10090 GN=Pdlim5 PE=1 SV=4	5119.01	19486.3	17664	17682.5	14363.9	18841.3	28449.1	38273.4	0.389571	0.129618	0.250469	5	-0.64631	0.992257	78.6101	82.3809	75.5254	81.8701	79.3498	78.4065	0.0195167
Q8CI94	Pygb	"Glycogen phosphorylase, brain form OS=Mus musculus OX=10090 GN=Pygb PE=1 SV=3"	684901	596930	681010	515733	385808	482685	523683	376031	-0.563137	0.0267544	0.102766	29	0.872491	0.962038	449.972	388.562	365.521	348.252	341.232	354.188	-0.200845
Q8CIB5	Fermt2	Fermitin family homolog 2 OS=Mus musculus OX=10090 GN=Fermt2 PE=1 SV=1	61251.7	51654.6	51414.2	52990.3	44131.6	34447.3	55651.7	33067.1	-0.424212	0.0789458	0.186903	10	0.719842	0.838308	189.263	197.821	180.402	207.622	225.604	216.862	0.196239
Q8CIE6	Copa	Coatomer subunit alpha OS=Mus musculus OX=10090 GN=Copa PE=1 SV=2	56521.1	60565.6	52676.5	45140.2	57593.2	47995.8	72268.2	54883.7	0.0431621	0.575505	0.694051	12	-0.0409573	0.993512	246.352	255.656	249.661	251.766	245.995	261.47	0.014155
Q8CIN4	Pak2	Serine/threonine-protein kinase PAK 2 OS=Mus musculus OX=10090 GN=Pak2 PE=1 SV=1	41319.4	43878.3	40132.9	41066.4	42695.7	102876	53923.4	108484	0.854484	0.0355986	0.116842	8	-0.634049	0.997055	109.221	113.248	101.593	109.933	107.083	109.572	0.0125676
Q8JZN5	Acad9	"Acyl-CoA dehydrogenase family member 9, mitochondrial OS=Mus musculus OX=10090 GN=Acad9 PE=1 SV=2"	80217.2	61233.4	71555.4	66800.2	77307.2	80486.2	57247.9	77634.8	0.164196	0.747933	0.82401	8	-0.172397	0.605997	37.7078	44.2119	33.4804	32.8977	32.4359	33.8955	-0.208649
Q8JZQ2	Afg3l2	AFG3-like protein 2 OS=Mus musculus OX=10090 GN=Afg3l2 PE=1 SV=1	15202.4	13503.1	13099.3	10322.8	8497.45	7383.86	7390.85	6314.86	-0.848258	0.00169991	0.0286013	7	0.972741	0.902575	62.0183	64.5203	58.5016	57.5317	61.9733	57.0654	-0.0674337
Q8JZQ9	Eif3b	Eukaryotic translation initiation factor 3 subunit B OS=Mus musculus OX=10090 GN=Eif3b PE=1 SV=1	42453.7	38174.7	39573.6	37756.3	55812.9	84376.5	49418.5	85227.2	0.82014	0.00743171	0.051722	7	-0.741112	0.97851	149.961	148.72	129.482	143.889	146.186	148.305	0.0371285
Q8JZU2	Slc25a1	"Tricarboxylate transport protein, mitochondrial OS=Mus musculus OX=10090 GN=Slc25a1 PE=1 SV=1"	348028	272930	150852	157398	82684.1	85459	112768	75665.3	-1.30198	0.00207739	0.0309485	9	0.934123	0.199598	324.773	480.624	224.741	216.076	260.875	179.257	-0.59856
Q8K010	Oplah	5-oxoprolinase OS=Mus musculus OX=10090 GN=Oplah PE=1 SV=1	33550	22858.5	31711.3	18693.7	18647	23592.9	24672.5	21377.8	-0.261632	0.312816	0.455555	10	0.583037	0.534178	55.8799	51.6798	51.2635	45.1753	50.1089	47.9025	-0.149719
Q8K021	Scamp1	Secretory carrier-associated membrane protein 1 OS=Mus musculus OX=10090 GN=Scamp1 PE=1 SV=1	3997.23	4679.72	1549.27	5923.4	2771.34	3653.17	6387.89	6659.35	0.159535	0.488888	0.622343	2	-0.290543	0.986456	53.4488	50.7878	51.1285	52.5064	49.0708	56.793	0.0254341
Q8K0E8	Fgb	Fibrinogen beta chain OS=Mus musculus OX=10090 GN=Fgb PE=1 SV=1	635894	502599	641930	662550	770205	722539	376008	746858	0.201353	0.849897	0.897875	26	-0.315034	0.820991	1.36377	8.36627	6.58651	1.68155	1.39062	6.95156	-0.736281
Q8K0Q5	Arhgap18	Rho GTPase-activating protein 18 OS=Mus musculus OX=10090 GN=Arhgap18 PE=1 SV=1	2323.81	2531.69	3386.73	2369.31	3109.09	5832.16	3324.68	5338.35	0.782521	0.0259335	0.101579	2	-0.686008	0.857734	84.3231	85.617	88.6349	87.9596	92.0299	100.448	0.115207
Q8K0U4	Hspa12a	Heat shock 70 kDa protein 12A OS=Mus musculus OX=10090 GN=Hspa12a PE=1 SV=1	50910.7	55201.6	52285.2	42373.3	53434.1	107274	74433.1	124892	0.792403	0.0208543	0.0896788	8	-0.658658	0.850895	85.0929	106.672	94.9113	111.293	111.952	103.347	0.193264
Q8K124	Plekho2	Pleckstrin homology domain-containing family O member 2 OS=Mus musculus OX=10090 GN=Plekho2 PE=1 SV=1	994.277	1401.39	1412.27	1347.8	1127.78	97.8601	2165.16	4377.68	0.185243	0.747617	0.82401	1	-0.388431	0.850895	44.2717	47.4272	44.6328	50.1218	43.5588	52.766	0.0992689
Q8K157	Galm	Aldose 1-epimerase OS=Mus musculus OX=10090 GN=Galm PE=1 SV=1	7456.05	4887.2	15315.1	15339.7	12052.9	1460.22	7313.14	3574.45	-1.06354	0.147567	0.270618	2	0.194166	0.703715	47.2902	49.5846	45.5945	43.4214	42.8419	43.9338	-0.129177
Q8K182	C8a	Complement component C8 alpha chain OS=Mus musculus OX=10090 GN=C8a PE=1 SV=1	3292.99	3470.31	2131.91	1849.77	3794.87	3888.52	1521.43	3901.04	0.535864	0.527095	0.655377	2	-0.140838	0.632	0.188763	2.47497	1.84548	0.420286	0.204175	1.38768	-0.95202
Q8K183	Pdxk	Pyridoxal kinase OS=Mus musculus OX=10090 GN=Pdxk PE=1 SV=1	40165.6	22256.8	44932.5	44665.2	50032.4	61232.3	31038.6	70127.6	0.38602	0.179258	0.309672	7	-0.669198	0.464412	72.0058	75.3694	84.1976	72.9427	55.1019	69.8467	-0.234271
Q8K1B8	Fermt3	Fermitin family homolog 3 OS=Mus musculus OX=10090 GN=Fermt3 PE=1 SV=1	251.525	7.42283	100.98	310.429	7.42283	7.42283	108.17	7.42283	-4.42427	0.0822793	0.190729	1	0.43058	0.834556	14.2685	17.4936	12.6773	16.9546	16.4189	17.379	0.204154
Q8K1E0	Stx5	Syntaxin-5 OS=Mus musculus OX=10090 GN=Stx5 PE=1 SV=3	172.048	131.458	840.567	1435.27	3500.48	3144.27	1906.42	1547.44	2.68664	0.00879046	0.0564217	2	-0.823348
Q8K1Z0	Coq9	"Ubiquinone biosynthesis protein COQ9, mitochondrial OS=Mus musculus OX=10090 GN=Coq9 PE=1 SV=1"	6997.48	6827.85	6515.23	9685.19	6017.46	5390.78	2468.48	4656.1	-0.464325	0.0322625	0.111739	2	0.530018	0.659675	81.2437	91.5083	72.0498	70.9326	81.2283	63.9521	-0.17991
Q8K274	Fn3krp	Ketosamine-3-kinase OS=Mus musculus OX=10090 GN=Fn3krp PE=1 SV=2	1963.11	2495.94	3042.08	2480.23	1824.93	8667.76	5458.01	13440.5	1.46699	0.0497154	0.141009	3	-0.653336	0.98469	22.0276	19.7962	17.6714	19.5363	20.4726	18.1377	-0.0290396
Q8K2B3	Sdha	"Succinate dehydrogenase [ubiquinone] flavoprotein subunit, mitochondrial OS=Mus musculus OX=10090 GN=Sdha PE=1 SV=1"	552443	372627	497982	391814	394816	389578	276699	335801	-0.288372	0.0992793	0.212409	20	0.654419	0.623322	465.733	505.932	410.957	402.841	428.584	385.12	-0.180779
Q8K2H2	Otud6b	Deubiquitinase OTUD6B OS=Mus musculus OX=10090 GN=Otud6b PE=1 SV=1	4233.48	1524.7	3451.59	2428.36	4369.04	12354.6	5925	12431.7	1.56327	0.00681904	0.0494451	1	-0.698909	0.665423	41.3747	50.9537	38.8289	40.6821	36.5637	39.3038	-0.161864
Q8K2I3	Fmo2	Dimethylaniline monooxygenase [N-oxide-forming] 2 OS=Mus musculus OX=10090 GN=Fmo2 PE=1 SV=3	42180	21448.3	30595.9	26823.5	13288.8	17329.3	51818.8	37217.5	-0.17382	0.684493	0.775818	8	0.0539939	0.976728	115.319	120.84	132.806	132.123	116.673	108.483	-0.0487411
Q8K310	Matr3	Matrin-3 OS=Mus musculus OX=10090 GN=Matr3 PE=1 SV=1	3037.59	6923.04	7844.78	6823.46	20265.2	34968	12446.8	44275.2	1.95349	0.00131599	0.0265187	4	-0.790158	0.515292	119.33	113.974	124.15	105.834	109.406	105.448	-0.155908
Q8K370	Acad10	Acyl-CoA dehydrogenase family member 10 OS=Mus musculus OX=10090 GN=Acad10 PE=1 SV=1	10402.4	6887.39	8263.94	9422.36	8374.27	8589.76	7295.89	4392.25	-0.174935	0.243223	0.382839	3	0.483923	0.948972	14.147	14.4235	12.6604	11.811	14.4662	12.7294	-0.0827512
Q8K3H0	Appl1	DCC-interacting protein 13-alpha OS=Mus musculus OX=10090 GN=Appl1 PE=1 SV=1	3687.81	3275.89	5159.55	4543.4	2493.89	7463.6	7250.32	7553.1	0.845688	0.251178	0.390624	3	-0.577636	0.993512	50.1872	54.0446	47.9397	51.5407	51.8886	50.4121	0.0174028
Q8K3J1	Ndufs8	"NADH dehydrogenase [ubiquinone] iron-sulfur protein 8, mitochondrial OS=Mus musculus OX=10090 GN=Ndufs8 PE=1 SV=1"	22504.5	27133.6	18198.8	23443.2	15023.2	9323.08	10911.1	11519.9	-1.03472	0.0011954	0.0255527	4	0.868292	0.623887	61.0256	61.948	52.647	51.6196	56.4366	49.3615	-0.156296
Q8K3K7	Agpat2	1-acyl-sn-glycerol-3-phosphate acyltransferase beta OS=Mus musculus OX=10090 GN=Agpat2 PE=1 SV=1	76220.1	61527.5	51904.3	47057.4	23464.9	9571.28	35898.4	12413.7	-1.72732	0.00252663	0.0329256	5	0.939818	0.932057	497.276	786.267	349.746	499.82	591.843	367.417	-0.110443
Q8K3W0	Babam2	BRISC and BRCA1-A complex member 2 OS=Mus musculus OX=10090 GN=Babam2 PE=1 SV=2	2876.4	2018.4	769.943	2120.41	937.283	955.331	1614.15	989.303	-1.0895	0.12473	0.244521	2	0.688014	0.929423	39.3488	43.4029	39.8074	36.8983	38.0715	39.9263	-0.0925151
Q8K4G5	Ablim1	Actin-binding LIM protein 1 OS=Mus musculus OX=10090 GN=Ablim1 PE=1 SV=1	21014.3	38654.5	32171.3	27331.3	34950	76935.6	55680.6	89332.4	1.14225	0.0103647	0.0596804	11	-0.718381	0.0978328	245.299	193.61	214.382	278.43	304.477	274.368	0.397294
Q8K4Q8	Colec12	Collectin-12 OS=Mus musculus OX=10090 GN=Colec12 PE=1 SV=1	3005.54	872.438	2012.71	2724.89	1795.77	3266.01	3611.26	5867.08	0.552348	0.131851	0.252115	2	-0.605121	0.987257	58.2299	59.1061	48.3109	61.6702	50.8999	57.0265	0.0354839
Q8K4Z3	Naxe	NAD(P)H-hydrate epimerase OS=Mus musculus OX=10090 GN=Naxe PE=1 SV=1	40455.8	21025.5	27506.2	39499.2	25961.4	11361.4	17476.9	18974.6	-0.856031	0.0288716	0.106692	4	0.558362	1	45.4467	45.7262	45.3246	46.9687	45.4867	43.7977	-0.00316371
Q8QZR5	Gpt	Alanine aminotransferase 1 OS=Mus musculus OX=10090 GN=Gpt PE=1 SV=3	181667	188124	188304	161837	194990	288725	241414	267599	0.459303	0.0299826	0.1078	13	-0.681299	0.457821	137.3	165.751	110.315	114.958	118.725	103.969	-0.274363
Q8QZS1	Hibch	"3-hydroxyisobutyryl-CoA hydrolase, mitochondrial OS=Mus musculus OX=10090 GN=Hibch PE=1 SV=1"	219542	198915	189625	162068	148889	174146	127236	143337	-0.410822	0.0582119	0.154238	12	0.88161	0.968637	136.854	135.548	109.269	115.688	138.474	113.619	-0.051759
Q8QZT1	Acat1	"Acetyl-CoA acetyltransferase, mitochondrial OS=Mus musculus OX=10090 GN=Acat1 PE=1 SV=1"	485050	609090	486005	445112	537281	730379	626291	476685	0.256702	0.285302	0.426035	19	-0.213254	0.899625	229.558	255.344	212.593	214.164	233.538	194.587	-0.11887
Q8QZY1	Eif3l	Eukaryotic translation initiation factor 3 subunit L OS=Mus musculus OX=10090 GN=Eif3l PE=1 SV=1	11873.5	10958.2	10225.1	10891.7	10923.7	6103	13902.6	6101.72	-0.420096	0.268926	0.410808	2	0.415692	0.980326	146.578	148.762	130.089	137.188	147.793	131.691	-0.0290944
Q8R010	Aimp2	Aminoacyl tRNA synthase complex-interacting multifunctional protein 2 OS=Mus musculus OX=10090 GN=Aimp2 PE=1 SV=2	4967.11	4606.43	3739.34	5393.28	4482.54	1751.1	4078.08	2736.73	-0.517857	0.0832633	0.19112	1	0.564333	0.953903	12.1009	11.6023	11.2432	10.8257	11.9944	13.6438	0.0554975
Q8R016	Blmh	Bleomycin hydrolase OS=Mus musculus OX=10090 GN=Blmh PE=1 SV=1	7763.75	3998.14	10935.4	7625	11426.2	1649.97	4175.33	16149.6	-0.155662	0.716965	0.802131	3	-0.279764	0.831203	58.0273	61.8028	46.4212	51.7969	48.6753	52.6104	-0.109262
Q8R050	Gspt1	Eukaryotic peptide chain release factor GTP-binding subunit ERF3A OS=Mus musculus OX=10090 GN=Gspt1 PE=1 SV=2	14204.6	12843.8	14925.6	12745.4	13580.6	11727.8	13100.4	14421.6	-0.018141	0.740802	0.818756	3	0.160782	0.913651	75.308	92.2135	74.4287	77.8301	74.95	76.714	-0.0692973
Q8R059	Gale	UDP-glucose 4-epimerase OS=Mus musculus OX=10090 GN=Gale PE=1 SV=1	5152.9	1266.75	2290.77	2730.11	394.687	282.948	448.788	367.213	-2.71566	7.03e-05	0.0156936	2	0.76493	0.878596	46.5001	48.8378	33.3117	34.4743	43.5588	27.0671	-0.298746
Q8R081	Hnrnpl	Heterogeneous nuclear ribonucleoprotein L OS=Mus musculus OX=10090 GN=Hnrnpl PE=1 SV=2	33881.2	36417.8	32375.1	33339.4	28016.9	27306.9	49427.3	48953.3	0.139994	0.636708	0.741542	6	-0.272157	0.983508	180.734	154.674	171.527	159.595	184.251	149.395	-0.0421046
Q8R0N6	Adhfe1	"Hydroxyacid-oxoacid transhydrogenase, mitochondrial OS=Mus musculus OX=10090 GN=Adhfe1 PE=1 SV=2"	89847.8	104717	123359	105935	107457	157512	111974	124866	0.16693	0.237128	0.376321	9	-0.547634	0.963038	184.259	192.428	174.851	174.75	190.554	155.153	-0.0876641
Q8R0W0	Eppk1	Epiplakin OS=Mus musculus OX=10090 GN=Eppk1 PE=1 SV=2	2361.97	3351.74	1975.38	1005.87	2685.26	3274.82	4303.7	2039.11	0.457177	0.170046	0.299481	1	-0.138979	0.970977	3.00472	2.59944	5.27049	5.1303	3.41746	3.372	0.174068
Q8R0X7	Sgpl1	Sphingosine-1-phosphate lyase 1 OS=Mus musculus OX=10090 GN=Sgpl1 PE=1 SV=1	14945.7	25316.8	20571.6	13971.4	16177.1	15537.3	29139.5	26626.1	0.243205	0.489112	0.622343	5	-0.193922	0.138837	145.241	155.068	141.714	118.013	129.032	118.404	-0.274645
Q8R0Y6	Aldh1l1	Cytosolic 10-formyltetrahydrofolate dehydrogenase OS=Mus musculus OX=10090 GN=Aldh1l1 PE=1 SV=1	778323	631491	704883	535044	461361	608494	537793	397337	-0.421599	0.0726143	0.177821	37	0.829782	0.239923	176.48	189.544	128.318	115.293	141.366	101.985	-0.456219
Q8R146	Apeh	Acylamino-acid-releasing enzyme OS=Mus musculus OX=10090 GN=Apeh PE=1 SV=3	15437.1	8454.49	17019.3	16237.4	26763.2	27649.9	10603.7	25427.1	0.72045	0.127883	0.248255	3	-0.672025	0.970977	36.2897	38.5695	33.5648	32.9371	35.8963	36.8136	-0.036727
Q8R164	Bphl	Valacyclovir hydrolase OS=Mus musculus OX=10090 GN=Bphl PE=1 SV=1	26282.7	25864.7	24891.8	23958.6	13915.9	12478.7	18208.9	10159.8	-0.945226	0.0014931	0.0275271	3	0.927203	0.555031	41.2531	41.4115	41.1234	38.3369	35.1054	35.8798	-0.180299
Q8R1B4	Eif3c	Eukaryotic translation initiation factor 3 subunit C OS=Mus musculus OX=10090 GN=Eif3c PE=1 SV=1	9288.84	5255.79	5893.2	9094.03	11738.2	10079.8	15111.6	11013.6	0.635191	0.0164761	0.0789619	6	-0.718334	1	166.796	182.533	150.116	162.63	168.457	170.016	0.00910567
Q8R1G2	Cmbl	Carboxymethylenebutenolidase homolog OS=Mus musculus OX=10090 GN=Cmbl PE=1 SV=1	20964	12178.2	24480.3	21004.5	33075.6	27215.3	21615	27200.4	0.374718	0.0773792	0.184708	3	-0.74177	0.768498	91.6364	97.6277	76.3859	94.1083	104.067	94.962	0.148199
Q8R1M2	H2afj	Histone H2A.J OS=Mus musculus OX=10090 GN=H2afj PE=1 SV=1	2.54775e+06	5.87715e+06	2.41456e+06	5.98613e+06	2.21158e+06	2.18878e+06	3.80908e+06	3.35979e+06	-0.505446	0.259311	0.39981	10	0.319926	0.703715	24.7423	23.2812	20.5059	24.5813	27.3935	25.1995	0.174202
Q8R1S0	Coq6	"Ubiquinone biosynthesis monooxygenase COQ6, mitochondrial OS=Mus musculus OX=10090 GN=Coq6 PE=1 SV=3"	1600.14	1188.47	1426.36	1344.38	353.177	1661.25	1039.25	1073.56	-0.390664	0.180897	0.311315	1	0.460238	0.982238	26.2617	23.1153	21.6194	23.32	25.6138	23.9155	0.0407691
Q8R1V4	Tmed4	Transmembrane emp24 domain-containing protein 4 OS=Mus musculus OX=10090 GN=Tmed4 PE=1 SV=1	6187.89	7974.36	6181.8	8903.28	5503.66	4203.01	4567.2	3095.89	-0.681043	0.0086586	0.0561998	2	0.697899	1	77.2528	77.2779	75.3736	74.874	75.1972	80.7021	0.00468373
Q8R2G4	Art3	Ecto-ADP-ribosyltransferase 3 OS=Mus musculus OX=10090 GN=Art3 PE=1 SV=2	4784.2	10168.9	4177.38	4356.65	3853.33	9362.3	13780.4	9270.2	1.02898	0.203783	0.339246	4	-0.278115	0.486684	194.652	200.518	192.583	245.972	224.615	239.428	0.27181
Q8R2U6	Nudt4	Diphosphoinositol polyphosphate phosphohydrolase 2 OS=Mus musculus OX=10090 GN=Nudt4 PE=1 SV=1	465.721	1186.78	1069.58	754.577	345.314	503.093	596.511	907.961	-0.713635	0.17048	0.299942	1	0.379016	0.98002	230.044	238.811	216.356	227.27	210.674	230.013	-0.036685
Q8R2Y2	Mcam	Cell surface glycoprotein MUC18 OS=Mus musculus OX=10090 GN=Mcam PE=1 SV=1	88867.6	130711	131162	159534	171612	100598	161682	79360.5	-0.0379832	0.913785	0.939815	13	-0.112946	0.527362	414.418	403.021	389.698	530.347	495.618	511.844	0.34919
Q8R3B1	Plcd1	"1-phosphatidylinositol 4,5-bisphosphate phosphodiesterase delta-1 OS=Mus musculus OX=10090 GN=Plcd1 PE=1 SV=2"	24209.9	19568.7	27307.3	27321.9	26498	24133.7	31455.4	38112.8	0.167153	0.205006	0.339976	5	-0.696649	0.904117	34.6893	34.4207	37.2429	38.869	36.9839	37.514	0.0927373
Q8R3U1	Pla2g16	HRAS-like suppressor 3 OS=Mus musculus OX=10090 GN=Pla2g16 PE=1 SV=2	2383.85	4027.54	2793.67	2269.82	2750.55	1296.15	1497.2	1593.22	-0.740621	0.0358635	0.117046	1	0.697734
Q8R3V5	Sh3glb2	Endophilin-B2 OS=Mus musculus OX=10090 GN=Sh3glb2 PE=1 SV=2	42667.4	38130.4	55695.5	42826	49783.2	81935.3	45242.9	71818.2	0.484194	0.0971875	0.21027	8	-0.622446	0.877638	164.102	164.175	148.109	172.129	191.74	150.212	0.104389
Q8R4N0	Clybl	"Citramalyl-CoA lyase, mitochondrial OS=Mus musculus OX=10090 GN=Clybl PE=1 SV=2"	101538	124890	108304	103907	104937	136635	110453	102064	0.0212872	0.791951	0.854577	11	0.00782102	0.851257	67.2855	73.6062	61.0661	65.3555	64.099	59.7889	-0.0906684
Q8R574	Prpsap2	Phosphoribosyl pyrophosphate synthase-associated protein 2 OS=Mus musculus OX=10090 GN=Prpsap2 PE=1 SV=1	1531.01	1453.61	2255.2	2172.2	1074.03	624.715	2048.33	873.607	-0.912777	0.0543344	0.148548	2	0.425323	0.587534	14.8155	14.382	12.9304	13.23	11.8214	12.0096	-0.184246
Q8R5C5	Actr1b	Beta-centractin OS=Mus musculus OX=10090 GN=Actr1b PE=1 SV=1	495.354	564.774	483.13	1358.84	1988.28	2258.99	2097.6	4233.94	2.04107	0.000844478	0.0218861	1	-0.871344	0.833975	78.1442	76.7178	71.223	79.4658	81.3766	81.3247	0.100199
Q8R5J9	Arl6ip5	PRA1 family protein 3 OS=Mus musculus OX=10090 GN=Arl6ip5 PE=1 SV=2	8882.65	7976.56	4896.19	5458.46	2275.54	1350.01	4018.92	1940.11	-1.65096	0.00167547	0.0286013	2	0.944872	0.921316	80.5347	76.0332	75.8122	83.2299	77.3971	87.3943	0.09275
Q8VBT0	Tmx1	Thioredoxin-related transmembrane protein 1 OS=Mus musculus OX=10090 GN=Tmx1 PE=1 SV=1	9071.32	6890.85	7207.89	7148.8	5901.06	5476.4	5379.25	5870.54	-0.340277	0.0271031	0.103012	1	0.842514	0.918542	34.1221	33.5495	35.5051	32.6218	32.4359	34.129	-0.0568655
Q8VBV7	Cops8	COP9 signalosome complex subunit 8 OS=Mus musculus OX=10090 GN=Cops8 PE=1 SV=1	1380.46	2348.47	3098.71	4509.69	5871.49	9832.14	4964.16	8300.8	1.3718	0.0047864	0.0423206	2	-0.864101	0.967784	57.1967	57.7785	52.0059	55.9354	56.2141	50.7428	-0.0357468
Q8VBW6	Nae1	NEDD8-activating enzyme E1 regulatory subunit OS=Mus musculus OX=10090 GN=Nae1 PE=1 SV=1	6433.72	5428.29	5374.52	4665.51	5911.11	6886.95	6561.61	6723.46	0.29831	0.142155	0.265468	3	-0.451821	0.518269	32.2988	33.1761	38.9132	31.3014	31.6202	29.0514	-0.178733
Q8VC28	Akr1c13	Aldo-keto reductase family 1 member C13 OS=Mus musculus OX=10090 GN=Akr1c13 PE=1 SV=2	1992.79	1104.82	2634.07	2159.38	2475.41	1383.65	1262.62	942.058	-0.650257	0.288196	0.429444	2	0.211803	0.952759	17.4694	18.4271	17.9582	17.4276	16.147	17.9626	-0.0645573
Q8VCF0	Mavs	Mitochondrial antiviral-signaling protein OS=Mus musculus OX=10090 GN=Mavs PE=1 SV=1	6174.68	13710.1	7226.95	6633.23	7033.41	21806.4	11807.8	16280.4	1.00182	0.101118	0.215544	1	-0.423365	0.963038	41.2936	40.8929	37.9346	43.0863	39.2085	43.039	0.0609182
Q8VCH0	Acaa1b	"3-ketoacyl-CoA thiolase B, peroxisomal OS=Mus musculus OX=10090 GN=Acaa1b PE=1 SV=1"	974.384	1289.25	1549.26	1591.52	4548.13	3285.75	4617.15	80.4974	1.45169	0.865102	0.908069	1	-0.444625	0.119411	29.6044	38.1754	28.8913	45.2541	57.45	47.4356	0.63908
Q8VCH8	Ubxn4	UBX domain-containing protein 4 OS=Mus musculus OX=10090 GN=Ubxn4 PE=1 SV=1	1397.2	1588.71	1644.78	2261.61	2259.25	1249.52	2692.95	7094.56	0.609637	0.185893	0.317434	3	-0.571025	0.940574	76.5235	71.7392	73.1127	81.2	76.7297	76.7724	0.0843557
Q8VCM7	Fgg	Fibrinogen gamma chain OS=Mus musculus OX=10090 GN=Fgg PE=1 SV=1	378265	330560	528026	462613	635514	598205	318462	587740	0.503308	0.285205	0.426035	14	-0.612892	0.860175	1.12066	7.43279	6.53589	1.76037	1.58836	6.62084	-0.518736
Q8VCM8	Ncln	Nicalin OS=Mus musculus OX=10090 GN=Ncln PE=1 SV=2	7517.18	6739.01	6875.91	6774.68	15935.6	27156.1	12642.1	26853.4	1.59976	0.000418932	0.0186156	4	-0.787499	1	52.8613	54.0238	44.211	50.4174	52.1357	48.1165	0.000837244
Q8VCR7	Abhd14b	Protein ABHD14B OS=Mus musculus OX=10090 GN=Abhd14b PE=1 SV=1	14164.8	15555.7	9051	16432	12027.1	17121.1	16974.4	15100.6	0.109099	0.48048	0.614972	3	-0.207115	0.64411	59.9316	52.7792	74.783	56.0734	49.0213	57.1432	-0.196897
Q8VCT3	Rnpep	Aminopeptidase B OS=Mus musculus OX=10090 GN=Rnpep PE=1 SV=2	38897.7	36145	38795.3	33615.2	27151.2	36386.3	38310.9	56442.6	-0.00426379	0.815294	0.872702	6	-0.219878	0.997854	71.398	63.6698	55.8021	65.5328	60.342	66.987	0.0208162
Q8VCT4	Ces1d	Carboxylesterase 1D OS=Mus musculus OX=10090 GN=Ces1d PE=1 SV=1	3.77994e+06	2.80882e+06	3.50728e+06	4.02316e+06	3.82014e+06	2.14156e+06	2.2493e+06	2.83164e+06	-0.528802	0.131014	0.250959	21	0.36464	0.817755	1204.45	1057.22	907.651	1184.17	1411.08	1202.29	0.265868
Q8VCW8	Acsf2	"Acyl-CoA synthetase family member 2, mitochondrial OS=Mus musculus OX=10090 GN=Acsf2 PE=1 SV=1"	12534.2	11027.4	7677.13	7958	4100.02	6150.33	6866.54	5580.69	-0.677157	0.0101586	0.0596804	3	0.92796	0.912836	24.8841	22.6796	21.2651	21.8814	23.2162	19.6162	-0.0894091
Q8VD75	Hip1	Huntingtin-interacting protein 1 OS=Mus musculus OX=10090 GN=Hip1 PE=1 SV=2	4601.18	8191.06	6078.45	6587.59	5257.1	5968.52	9107.62	7592.05	0.0892042	0.607372	0.718482	4	-0.210897	0.432002	126.056	134.241	115.799	163.911	143.69	157.76	0.307697
Q8VDC1	Fyco1	FYVE and coiled-coil domain-containing protein 1 OS=Mus musculus OX=10090 GN=Fyco1 PE=1 SV=1	781.328	178.872	71.6411	447.473	1135.9	2730.27	1288.41	3011.97	2.72889	0.00346818	0.0364265	1	-0.751453	0.861811	85.336	89.662	81.9874	89.1223	91.8321	96.7518	0.112007
Q8VDD5	Myh9	Myosin-9 OS=Mus musculus OX=10090 GN=Myh9 PE=1 SV=4	1.91851e+06	1.80583e+06	1.73088e+06	1.4793e+06	2.13931e+06	4.86214e+06	3.46411e+06	4.21303e+06	1.11159	0.00393048	0.038923	142	-0.697097	0.256294	347.645	355.849	308.038	428.736	461.013	445.817	0.40312
Q8VDJ3	Hdlbp	Vigilin OS=Mus musculus OX=10090 GN=Hdlbp PE=1 SV=1	49494.7	65659.2	59852.2	48361.1	57421.8	60961	77022.3	60151.9	0.153909	0.302321	0.444756	14	-0.301427	0.634819	319.891	346.991	279.761	348.114	354.852	378.058	0.196237
Q8VDL4	Adpgk	ADP-dependent glucokinase OS=Mus musculus OX=10090 GN=Adpgk PE=1 SV=2	9736.28	9449.06	10231.9	9215.94	8811.22	10139	9691.22	12383.9	0.0474923	0.647321	0.750875	3	-0.359256	0.61599	34.9527	33.0102	35.9606	32.8189	32.6336	29.032	-0.138734
Q8VDM4	Psmd2	26S proteasome non-ATPase regulatory subunit 2 OS=Mus musculus OX=10090 GN=Psmd2 PE=1 SV=1	79450.4	98813	89014.9	76631.3	73630.6	81458.6	78395.7	68656.2	-0.14651	0.2762	0.418405	13	0.720771	0.992257	166.877	184.462	141.512	166.375	165.886	167.409	0.0283238
Q8VDN2	Atp1a1	Sodium/potassium-transporting ATPase subunit alpha-1 OS=Mus musculus OX=10090 GN=Atp1a1 PE=1 SV=1	40805.9	29754.6	29856.5	33921.6	28656.3	51863.4	50190.6	44254.9	0.566503	0.157601	0.283994	6	-0.450039	0.967784	158.976	144.675	214.382	158.984	105.773	216.083	-0.14679
Q8VDP6	Cdipt	CDP-diacylglycerol--inositol 3-phosphatidyltransferase OS=Mus musculus OX=10090 GN=Cdipt PE=1 SV=1	2770.31	2969.87	1791.82	1490.4	977.592	90.8677	2215.26	1076.94	-1.11861	0.0883953	0.197663	1	0.777578	0.986456	59.9316	57.9444	52.1746	54.2209	57.2276	55.1005	-0.0279033
Q8VDQ1	Ptgr2	Prostaglandin reductase 2 OS=Mus musculus OX=10090 GN=Ptgr2 PE=1 SV=2	17646.3	23119.3	22089.5	18330.1	19030.5	17408.5	25517.7	23636.7	0.0758852	0.726225	0.808836	5	-0.164041	0.840758	110.497	124.45	94.3377	102.779	102.436	98.8528	-0.105951
Q8VDQ8	Sirt2	NAD-dependent protein deacetylase sirtuin-2 OS=Mus musculus OX=10090 GN=Sirt2 PE=1 SV=2	4042.67	3540.31	5687.55	6055.55	4751.67	3465.86	5211.26	3802.61	-0.173846	0.544162	0.666926	2	-0.0215122	0.987589	70.3648	71.3658	68.1017	68.9816	75.395	69.0102	0.0232366
Q8VE47	Uba5	Ubiquitin-like modifier-activating enzyme 5 OS=Mus musculus OX=10090 GN=Uba5 PE=1 SV=2	5217.95	9076.11	8295.22	9344.8	12154.3	27954.8	16646.2	31293.7	1.3139	0.00294269	0.0346918	3	-0.779588	0.948721	49.9036	54.7499	53.9968	49.9247	52.7537	49.9841	-0.054792
Q8VE95	NA	UPF0598 protein C8orf82 homolog OS=Mus musculus OX=10090 PE=1 SV=1	6696.65	7096.98	7748.58	7710.28	6668.35	8513.75	4850.2	7984.45	-0.0197327	0.666123	0.763486	2	-0.0264123	1	1.4448	0.649499	1.10311	0.893258	1.21759	1.05696	0.0504164
Q8VEE0	Rpe	Ribulose-phosphate 3-epimerase OS=Mus musculus OX=10090 GN=Rpe PE=1 SV=1	6673.89	9602.23	9190.69	10281.8	15465.3	14672.3	8374.66	19085.7	0.681222	0.0452239	0.134662	3	-0.768987	0.424573	63.9023	79.1033	54.0811	55.1274	57.7961	51.2875	-0.247461
Q8VEK3	Hnrnpu	Heterogeneous nuclear ribonucleoprotein U OS=Mus musculus OX=10090 GN=Hnrnpu PE=1 SV=1	339343	346228	313914	403263	412300	533212	418162	737196	0.462151	0.0362065	0.117605	19	-0.73409	0.901467	342.682	317.701	379.66	316.346	355.568	298.452	-0.100039
Q8VEM8	Slc25a3	"Phosphate carrier protein, mitochondrial OS=Mus musculus OX=10090 GN=Slc25a3 PE=1 SV=1"	423198	358427	306458	252021	341196	396908	316324	351185	0.0627328	0.658293	0.75903	8	0.183881	0.840511	299.045	295.339	259.599	258.131	274.396	254.466	-0.115726
Q8VH51	Rbm39	RNA-binding protein 39 OS=Mus musculus OX=10090 GN=Rbm39 PE=1 SV=2	2716.56	3991.32	1463.09	3530.37	3479.17	2867.25	6539.5	5808.54	0.53766	0.107751	0.224365	2	-0.508474	0.744874	231.948	203.36	269.131	205.513	234.502	189.956	-0.157217
Q8VHX6	Flnc	Filamin-C OS=Mus musculus OX=10090 GN=Flnc PE=1 SV=3	1873.84	1510.99	1501.65	1715.27	1059.16	2875.37	3314.87	7051.64	0.939384	0.131055	0.250959	2	-0.569574	0.4109	16.7198	16.7261	15.8661	23.4974	17.3582	50.9568	0.742593
Q8VHY0	Cspg4	Chondroitin sulfate proteoglycan 4 OS=Mus musculus OX=10090 GN=Cspg4 PE=1 SV=3	16288.4	16993.1	21971.1	15669.5	12599.6	24250.3	17018.5	20905.3	0.181086	0.84484	0.894932	7	-0.159716	0.988347	40.3415	37.9057	31.0846	41.1748	43.8554	41.0546	0.213726
Q8VI36	Pxn	Paxillin OS=Mus musculus OX=10090 GN=Pxn PE=1 SV=1	4607.29	6554.61	7436.21	3641.58	5007.19	8343.5	7048.93	8943.92	0.480815	0.173595	0.303729	3	-0.432581	0.716615	69.8178	59.7699	73.4333	75.8003	72.7749	74.6714	0.14225
Q8VIJ6	Sfpq	"Splicing factor, proline- and glutamine-rich OS=Mus musculus OX=10090 GN=Sfpq PE=1 SV=1"	19211.1	46092.6	25622.7	41495.5	28649.7	31786.2	48698.9	72052.4	0.270956	0.276999	0.418968	9	-0.480401	0.991671	118.358	104.224	131.135	118.486	122.655	106.479	-0.0213379
Q91V41	Rab14	Ras-related protein Rab-14 OS=Mus musculus OX=10090 GN=Rab14 PE=1 SV=3	85154.9	80692.2	74359.3	92869.3	73070.9	82010.2	72948.8	75979.1	-0.153811	0.409612	0.551132	7	0.422614	0.555126	122.956	117.355	116.575	104.711	107.627	109.786	-0.147716
Q91V61	Sfxn3	Sideroflexin-3 OS=Mus musculus OX=10090 GN=Sfxn3 PE=1 SV=1	19201	14489.2	14003.7	17239.3	12249.3	29022.9	24692.6	41131.1	0.760297	0.115312	0.232908	5	-0.582574	0.0950628	28.4699	26.1854	29.6505	37.9034	32.9549	38.1754	0.369737
Q91V64	Isoc1	Isochorismatase domain-containing protein 1 OS=Mus musculus OX=10090 GN=Isoc1 PE=1 SV=1	49950.4	54152.8	52492	59930.7	63319.7	48803.9	51329.1	48099.5	-0.0911791	0.812165	0.86989	5	-0.0230012	0.963038	123.584	151.853	105.676	124.891	120.43	117.723	-0.0545144
Q91V76	NA	Ester hydrolase C11orf54 homolog OS=Mus musculus OX=10090 PE=1 SV=1	91671.2	52600.7	64123.1	68042.6	80732.6	73751.5	51592.5	74230.9	0.163704	0.900981	0.934411	9	-0.00831533	1	1.4448	0.649499	1.10311	0.893258	1.21759	1.05696	0.0504164
Q91V92	Acly	ATP-citrate synthase OS=Mus musculus OX=10090 GN=Acly PE=1 SV=1	4.98895e+06	3.48287e+06	2.37691e+06	1.68155e+06	541173	952859	742067	671463	-2.02718	0.00028242	0.0156936	53	0.947032	0.0387009	745.83	1545.5	313.859	282.016	357.768	225.947	-1.32939
Q91VC3	Eif4a3	Eukaryotic initiation factor 4A-III OS=Mus musculus OX=10090 GN=Eif4a3 PE=1 SV=3	4728.57	6080.32	5767.44	4877.57	6882.98	8679.63	8097.98	18528.8	0.660551	0.0204805	0.0892923	1	-0.654693	0.975948	49.1135	50.8085	47.8891	48.5452	49.6393	46.638	-0.0295233
Q91VD1	Lgals12	Galectin-12 OS=Mus musculus OX=10090 GN=Lgals12 PE=1 SV=2	83.402	1173.25	1311.61	1113.3	156.415	72.9681	372.671	577.569	-2.24296	0.172747	0.303422	1	0.39932
Q91VD9	Ndufs1	"NADH-ubiquinone oxidoreductase 75 kDa subunit, mitochondrial OS=Mus musculus OX=10090 GN=Ndufs1 PE=1 SV=2"	218161	206682	173270	196153	169967	170843	156021	117949	-0.306202	0.0651608	0.166137	18	0.859502	0.219911	133.916	154.819	116.254	110.288	115.536	103.911	-0.288077
Q91VE0	Slc27a4	Long-chain fatty acid transport protein 4 OS=Mus musculus OX=10090 GN=Slc27a4 PE=1 SV=1	2160	894.749	1252.69	720.442	495.053	1195.47	1273.08	1848.73	0.220663	0.864859	0.908069	2	0.171777	0.943433	47.351	49.9165	38.6095	47.6387	47.1675	48.0776	0.0811414
Q91VF2	Hnmt	Histamine N-methyltransferase OS=Mus musculus OX=10090 GN=Hnmt PE=1 SV=1	9611.93	12903.6	13517.2	13500	12170.3	14718.1	11179.4	16056.4	0.0201113	0.531115	0.658386	5	-0.513206	0.977502	24.8436	27.2641	22.7836	24.5222	22.5241	24.1879	-0.0693418
Q91VH2	Snx9	Sorting nexin-9 OS=Mus musculus OX=10090 GN=Snx9 PE=1 SV=1	10262.3	10469.1	8343.1	8100.55	7151.46	8411.36	10282.7	10646.6	0.00730948	0.8587	0.905738	3	0.247061	0.976728	70.142	77.4853	63.192	72.6077	68.2763	74.5546	0.0352877
Q91VH6	Memo1	Protein MEMO1 OS=Mus musculus OX=10090 GN=Memo1 PE=1 SV=1	3000.46	1463.33	1141.05	521.064	1495.38	1304.1	1783.09	2150.99	0.337638	0.444298	0.583752	2	0.16501	0.114799	30.1311	33.508	26.9679	25.2119	25.9599	21.6978	-0.313021
Q91VI7	Rnh1	Ribonuclease inhibitor OS=Mus musculus OX=10090 GN=Rnh1 PE=1 SV=1	90707.6	93877.5	98233.8	101132	65940.5	69153.4	97473.6	85576.7	-0.31999	0.136533	0.258309	11	0.505514	0.967245	86.0856	88.3552	82.561	86.186	87.8279	90.3708	0.0411476
Q91VJ2	Cavin3	Caveolae-associated protein 3 OS=Mus musculus OX=10090 GN=Cavin3 PE=1 SV=1	256127	207759	296002	321977	612363	767392	290704	625755	1.16876	0.0102888	0.0596804	12	-0.77382	0.921316	226.195	259.037	190.947	248.632	241.818	243.864	0.130041
Q91VN4	Chchd6	MICOS complex subunit Mic25 OS=Mus musculus OX=10090 GN=Chchd6 PE=1 SV=2	12106.3	15741.2	13120.1	14367.1	15265.6	24549.9	12684.9	16962	0.229024	0.228259	0.367292	4	-0.423357	0.982238	33.494	36.018	30.3929	35.5582	37.1569	29.8685	0.0353607
Q91VR2	Atp5f1c	"ATP synthase subunit gamma, mitochondrial OS=Mus musculus OX=10090 GN=Atp5f1c PE=1 SV=1"	619658	323653	280292	223671	235279	198559	173025	182018	-0.663867	0.0336219	0.114025	14	0.778563
Q91VR5	Ddx1	ATP-dependent RNA helicase DDX1 OS=Mus musculus OX=10090 GN=Ddx1 PE=1 SV=1	7245.91	7511.83	6095.54	8326.88	2400.39	1954.41	4062.56	3263.99	-1.39821	0.0004497	0.0194833	3	0.831521	0.873803	96.3365	103.83	86.8971	90.2062	89.8794	91.1101	-0.0782384
Q91VS7	Mgst1	Microsomal glutathione S-transferase 1 OS=Mus musculus OX=10090 GN=Mgst1 PE=1 SV=3	487648	508938	438506	492729	539963	602440	498657	523278	0.116901	0.290482	0.431127	8	-0.523187	0.999821	714.854	716.795	636.569	689.581	802.857	600.75	0.00936661
Q91VT4	Cbr4	Carbonyl reductase family member 4 OS=Mus musculus OX=10090 GN=Cbr4 PE=1 SV=2	3923.67	5754.09	4094.77	3016.39	2633.32	628.025	2281.4	952.627	-1.44304	0.00873027	0.0562437	3	0.875611	0.560646	28.8143	29.8363	28.0645	26.2958	26.9238	24.6159	-0.156431
Q91VW3	Sh3bgrl3	SH3 domain-binding glutamic acid-rich-like protein 3 OS=Mus musculus OX=10090 GN=Sh3bgrl3 PE=1 SV=1	28569.7	16511.8	36962.6	23595.4	25752.8	37806.4	17948.1	51411.7	0.265185	0.464823	0.600252	4	-0.430912	0.634149	59.7898	59.2306	60.4419	67.2079	56.486	94.32	0.247434
Q91VZ6	Smap1	Stromal membrane-associated protein 1 OS=Mus musculus OX=10090 GN=Smap1 PE=1 SV=1	1133.79	1345.25	1004.79	1568.47	1516.86	1197.64	1457.11	1886.83	0.26759	0.242636	0.382262	1	-0.611049	0.873803	49.0122	49.232	46.8093	48.8211	43.1633	45.8403	-0.0752009
Q91W50	Csde1	Cold shock domain-containing protein E1 OS=Mus musculus OX=10090 GN=Csde1 PE=1 SV=1	14381.5	17633.7	14669.5	12113.4	14762.5	24707.4	19304	19106.9	0.402981	0.0891799	0.198394	6	-0.443644	0.974465	352.73	394.288	319.005	344.153	350.625	344.733	-0.0309777
Q91W89	Man2c1	Alpha-mannosidase 2C1 OS=Mus musculus OX=10090 GN=Man2c1 PE=1 SV=1	6093.06	2747.92	5169.33	5512.89	7104.58	7089.53	4206.65	7162.61	0.410827	0.199356	0.333801	3	-0.590078	0.966547	58.9795	57.82	62.4665	59.1674	69.5369	56.3845	0.0410055
Q91W90	Txndc5	Thioredoxin domain-containing protein 5 OS=Mus musculus OX=10090 GN=Txndc5 PE=1 SV=2	28364.2	28248.1	27459.1	31179	25510	36617.6	30248.5	43836.2	0.23359	0.3089	0.45175	4	-0.54613	0.967805	144.451	155.068	146.101	152.047	133.407	146.477	-0.0464727
Q91W92	Cdc42ep1	Cdc42 effector protein 1 OS=Mus musculus OX=10090 GN=Cdc42ep1 PE=1 SV=1	1932.14	2290.21	1790.97	4386.26	7183.16	11721.9	8130.33	14879	2.21439	0.000258666	0.0156936	3	-0.878361	0.00326503	123.443	101.341	112.694	177.627	178.442	176.728	0.663456
Q91WD5	Ndufs2	"NADH dehydrogenase [ubiquinone] iron-sulfur protein 2, mitochondrial OS=Mus musculus OX=10090 GN=Ndufs2 PE=1 SV=1"	35377.6	22761.6	23071	22561.1	14293.4	10377.7	14489.8	10410.8	-0.909629	0.00108446	0.0250582	4	0.900858	0.593664	217.362	218.545	179.406	181.431	194.435	166.903	-0.177846
Q91WJ8	Fubp1	Far upstream element-binding protein 1 OS=Mus musculus OX=10090 GN=Fubp1 PE=1 SV=1	5107.18	4685.46	5781.79	5374.37	8742.63	9870.74	4776.44	7529.31	0.630982	0.0610158	0.159008	3	-0.660232	0.859184	67.4678	63.8772	73.9732	77.2586	84.3921	63.6992	0.127192
Q91WK2	Eif3h	Eukaryotic translation initiation factor 3 subunit H OS=Mus musculus OX=10090 GN=Eif3h PE=1 SV=1	19551.9	20018.1	26098.6	16047.6	28626.1	22419.8	24703.8	35731.1	0.426724	0.0710637	0.175414	3	-0.656692	0.909442	100.165	102.586	102.504	100.434	93.8837	98.4054	-0.06096
Q91WQ3	Yars	"Tyrosine--tRNA ligase, cytoplasmic OS=Mus musculus OX=10090 GN=Yars PE=1 SV=3"	11606.3	11121.8	11786.2	9405.71	9957.01	9553.25	9453.68	9783.42	-0.232914	0.26719	0.408684	4	0.795717	1	42.2053	39.2334	36.4668	39.0464	40.0489	38.1754	-0.00549744
Q91WS0	Cisd1	CDGSH iron-sulfur domain-containing protein 1 OS=Mus musculus OX=10090 GN=Cisd1 PE=1 SV=1	23239.8	30651.6	11931.8	19287.5	7379.01	4692.93	10082.5	3616.68	-1.8471	0.00163542	0.0286013	2	0.907264	0.991184	61.3497	63.3794	47.7204	57.65	56.6591	61.3842	0.0372725
Q91WU0	Ces1f	Carboxylesterase 1F OS=Mus musculus OX=10090 GN=Ces1f PE=1 SV=1	425746	228762	396808	363330	409718	392371	231655	303457	-0.138005	0.776547	0.844793	14	0.0510102	0.379106	111.429	94.4124	88.23	119.668	139.883	105.623	0.30989
Q91X52	Dcxr	L-xylulose reductase OS=Mus musculus OX=10090 GN=Dcxr PE=1 SV=2	3121.55	3096.68	4015.6	2979.98	3515.44	4143.26	3672.19	4500.59	0.327213	0.157647	0.283994	2	-0.665576	0.909733	18.1177	17.867	18.0426	16.1466	16.7897	18.2544	-0.0796852
Q91X72	Hpx	Hemopexin OS=Mus musculus OX=10090 GN=Hpx PE=1 SV=2	198979	111908	157151	196022	241715	192982	86702.6	231612	0.268503	0.759979	0.831467	13	-0.342857	0.873803	1.32325	6.74824	6.48527	1.34652	1.71195	6.83483	-0.625993
Q91XD2	Lims2	LIM and senescent cell antigen-like-containing domain protein 2 OS=Mus musculus OX=10090 GN=Lims2 PE=1 SV=1	3754.88	3394.49	4161.5	3517.19	3503.3	2685.67	3078.91	4938.04	-0.146027	0.664288	0.763402	2	-0.047987	0.00865019	112.766	96.4661	107.667	140.085	165.96	142.352	0.499536
Q91XD7	Creld1	Cysteine-rich with EGF-like domain protein 1 OS=Mus musculus OX=10090 GN=Creld1 PE=1 SV=1	4125.32	5507.96	7984.11	7060.52	8881.33	9194.35	7009.95	11934.5	0.535115	0.0444982	0.132729	3	-0.849424	0.564755	56.0217	60.4752	45.3583	64.981	66.5708	57.7463	0.233647
Q91Y97	Aldob	Fructose-bisphosphate aldolase B OS=Mus musculus OX=10090 GN=Aldob PE=1 SV=3	41045.8	15111.1	8591.42	8278.35	32257.8	29190.1	16146.6	38755.8	1.42927	0.108351	0.224877	6	-0.235351	0.525357	9.42672	9.88058	21.6026	8.87467	1.44005	10.1615	-1.31788
Q91YE6	Ipo9	Importin-9 OS=Mus musculus OX=10090 GN=Ipo9 PE=1 SV=3	1834.18	2640.81	3769.33	2179.72	3349.32	2581.91	1828.22	3656.38	0.293594	0.660426	0.760983	3	-0.31406	0.827224	107.195	110.634	95.8055	108.573	113.411	113.054	0.0976745
Q91YH5	Atl3	Atlastin-3 OS=Mus musculus OX=10090 GN=Atl3 PE=1 SV=1	83086.4	64647.7	95028	71739.7	95575	102863	114442	104452	0.42502	0.0395003	0.122239	6	-0.75465	0.980326	238.735	275.528	204.461	230.482	234.007	234.662	-0.029214
Q91YI0	Asl	Argininosuccinate lyase OS=Mus musculus OX=10090 GN=Asl PE=1 SV=1	5809.14	6504.82	7643.07	6645.01	6683.55	7223.58	5205.85	7313.19	0.0797746	0.932032	0.955746	3	-0.175389	0.880845	31.7315	28.4257	30.1735	25.5075	28.1103	28.8958	-0.131172
Q91YJ2	Snx4	Sorting nexin-4 OS=Mus musculus OX=10090 GN=Snx4 PE=1 SV=1	672.334	666.264	553.371	683.969	644.453	1174.1	847.991	1840.12	0.576134	0.0508995	0.142733	1	-0.625212	0.866553	49.782	52.8622	49.0195	50.5948	44.9924	46.5212	-0.094886
Q91YQ5	Rpn1	Dolichyl-diphosphooligosaccharide--protein glycosyltransferase subunit 1 OS=Mus musculus OX=10090 GN=Rpn1 PE=1 SV=1	287356	202976	214924	220245	193690	249876	186444	236155	-0.0247275	0.625303	0.733187	22	0.31326	0.997854	118.864	117.729	121.383	120.575	113.633	127.509	0.0135195
Q91YR1	Twf1	Twinfilin-1 OS=Mus musculus OX=10090 GN=Twf1 PE=1 SV=2	11990.2	11632.9	14206	14122.3	17446.6	33787.1	15263.3	26247	0.717634	0.0185663	0.0842286	5	-0.685979	0.974877	78.4683	81.0533	73.602	76.8448	74.6782	76.0331	-0.0338213
Q91YR9	Ptgr1	Prostaglandin reductase 1 OS=Mus musculus OX=10090 GN=Ptgr1 PE=1 SV=2	821.994	717.295	631.958	631.844	673.984	75.3845	551.593	1016.49	-0.143038	0.315615	0.458092	1	0.177144	0.541162	9.77112	11.2289	6.99143	10.2542	8.01492	35.8798	0.647556
Q91YT0	Ndufv1	"NADH dehydrogenase [ubiquinone] flavoprotein 1, mitochondrial OS=Mus musculus OX=10090 GN=Ndufv1 PE=1 SV=1"	73937.6	54937	52417.8	59472.5	30843.2	18286.8	28514	12662.3	-1.32376	0.000844486	0.0218861	9	0.909985	0.992257	144.208	146.833	111.766	129.522	135.508	131.691	-0.0113564
Q91YW3	Dnajc3	DnaJ homolog subfamily C member 3 OS=Mus musculus OX=10090 GN=Dnajc3 PE=1 SV=1	4756.03	6812.61	8057.89	7390.62	9472.92	17352.7	8562.04	19291.3	0.853497	0.0151166	0.0753514	3	-0.750919	0.96482	147.226	144.177	128.385	138.962	129.106	133.345	-0.0626496
Q91YX5	Lpgat1	Acyl-CoA:lysophosphatidylglycerol acyltransferase 1 OS=Mus musculus OX=10090 GN=Lpgat1 PE=1 SV=1	7575.46	11641.9	11603.1	8415.78	14298.8	8492.49	14000.5	15343.5	0.517847	0.145299	0.26759	3	-0.574951	0.991671	573.753	781.91	570.634	653.595	617.599	607.325	-0.0208196
Q91Z53	Grhpr	Glyoxylate reductase/hydroxypyruvate reductase OS=Mus musculus OX=10090 GN=Grhpr PE=1 SV=1	74310.7	72909.6	65624.8	64827.1	69788.4	77847.4	68946	70087.7	0.0158994	0.752234	0.827028	9	0.0588199	0.883218	39.4501	36.9308	35.4376	40.9777	45.635	34.5764	0.108212
Q91ZA3	Pcca	"Propionyl-CoA carboxylase alpha chain, mitochondrial OS=Mus musculus OX=10090 GN=Pcca PE=1 SV=2"	1.49753e+06	517599	1.04275e+06	579143	676255	1.32137e+06	490418	796733	-0.0822854	0.8042	0.864565	33	0.241777	0.947512	112.24	116.816	94.4051	103.193	104.957	102.024	-0.0545665
Q91ZJ5	Ugp2	UTP--glucose-1-phosphate uridylyltransferase OS=Mus musculus OX=10090 GN=Ugp2 PE=1 SV=3	107294	75433.5	79182	72850.7	74472	87934.5	76160.1	86194.4	0.0681254	0.871246	0.912519	10	0.305331	0.758901	110.578	129.283	103.094	109.224	99.6676	97.5689	-0.15753
Q91ZP3	Lpin1	Phosphatidate phosphatase LPIN1 OS=Mus musculus OX=10090 GN=Lpin1 PE=1 SV=1	12666.7	22160.8	10561.6	10412.4	22631.6	19392.1	22251.8	23722.5	0.956195	0.0206456	0.089447	5	-0.536961	0.0658706	216.876	275.155	211.024	291.89	388.813	294.678	0.469707
Q91ZV0	Mia2	Melanoma inhibitory activity protein 2 OS=Mus musculus OX=10090 GN=Mia2 PE=1 SV=3	911.935	1930.8	1338.8	1198.5	1020.67	3003.63	1746.18	2864.91	0.820259	0.145658	0.267968	2	-0.493225	0.129213	102.009	108.02	100.648	78.9534	83.3787	83.9899	-0.334734
Q91ZX7	Lrp1	Prolow-density lipoprotein receptor-related protein 1 OS=Mus musculus OX=10090 GN=Lrp1 PE=1 SV=1	56622.7	44703.3	71886.2	73978.9	83713.8	96742.6	65686.6	73854.3	0.301526	0.11302	0.229459	29	-0.735864	0.381194	533.62	515.64	470.87	615.974	629.661	599.933	0.28158
Q920Q4	Vps16	Vacuolar protein sorting-associated protein 16 homolog OS=Mus musculus OX=10090 GN=Vps16 PE=1 SV=3	3634.37	3085.86	1423.74	1797.7	2730.9	2335.55	3460.82	4889.07	0.384332	0.213249	0.349962	2	-0.247112	0.889766	33.8587	31.7033	36.568	34.4546	38.4422	35.6658	0.0890637
Q921F2	Tardbp	TAR DNA-binding protein 43 OS=Mus musculus OX=10090 GN=Tardbp PE=1 SV=1	50396.3	38226.2	45766.1	32548.7	46361.6	68713.6	51757.5	65385.6	0.475949	0.0506644	0.142535	6	-0.568822	0.991317	124.759	122.521	138.643	126.802	137.263	115.934	-0.023576
Q921G7	Etfdh	"Electron transfer flavoprotein-ubiquinone oxidoreductase, mitochondrial OS=Mus musculus OX=10090 GN=Etfdh PE=1 SV=1"	164925	107863	140272	123792	153532	168756	92326.3	149584	0.201681	0.828336	0.883933	14	-0.106074	0.997854	94.7968	102.648	83.354	91.5463	98.2093	88.3281	-0.010162
Q921H8	Acaa1a	"3-ketoacyl-CoA thiolase A, peroxisomal OS=Mus musculus OX=10090 GN=Acaa1a PE=1 SV=1"	229205	331996	330938	296491	431227	591784	465518	515369	0.644946	0.00329638	0.0361673	17	-0.839789	0.970977	103.265	94.1635	82.5441	86.6589	96.7509	88.192	-0.0394469
Q921I1	Tf	Serotransferrin OS=Mus musculus OX=10090 GN=Tf PE=1 SV=1	2.3063e+06	1.25336e+06	1.76279e+06	1.80093e+06	1.68717e+06	1.18849e+06	865220	1.73156e+06	-0.331433	0.188996	0.320793	41	0.381698
Q921J2	Rheb	GTP-binding protein Rheb OS=Mus musculus OX=10090 GN=Rheb PE=1 SV=1	5230.09	8089.09	9075.5	9803.77	10695.9	19686.8	9267.13	16993.3	0.653962	0.0315995	0.11063	2	-0.733472	0.935937	76.8274	78.9996	70.9025	72.8048	74.1591	72.3174	-0.0467674
Q921L3	Tmco1	Calcium load-activated calcium channel OS=Mus musculus OX=10090 GN=Tmco1 PE=1 SV=1	4053.77	3347.65	4164.57	4003.71	6229.62	10075.5	7139.94	9235.9	1.01128	0.00059083	0.0208935	1	-0.83632	0.796237	76.8274	82.7335	77.3644	73.5142	74.2827	74.1266	-0.0935738
Q921M3	Sf3b3	Splicing factor 3B subunit 3 OS=Mus musculus OX=10090 GN=Sf3b3 PE=1 SV=1	1120.35	530.793	1561.02	1264.13	1120.98	465.927	875.043	505.496	-0.83945	0.182613	0.313335	2	0.297296	0.912031	74.7812	73.212	68.8272	70.0852	71.6626	67.0842	-0.0538107
Q921M7	Fam49b	Protein FAM49B OS=Mus musculus OX=10090 GN=Fam49b PE=1 SV=1	1458.31	2318.44	2506.7	2670.71	3528.36	1089.31	1293.62	4007.37	-0.174271	0.922132	0.946715	1	-0.332319	0.300685	36.0669	39.3371	31.4221	29.9614	26.5778	30.6661	-0.289457
Q921T2	Tor1aip1	Torsin-1A-interacting protein 1 OS=Mus musculus OX=10090 GN=Tor1aip1 PE=1 SV=3	6802.72	16053	9408.69	11303.6	12996.5	20792.7	15768	21854.2	0.812108	0.0318128	0.110929	5	-0.661824	0.749319	104.177	106.9	101.002	113.717	110.395	111.012	0.10305
Q922B2	Dars	"Aspartate--tRNA ligase, cytoplasmic OS=Mus musculus OX=10090 GN=Dars PE=1 SV=2"	38838.4	53249.1	49173.5	47810.5	40730.7	35993.6	47051.1	32583.4	-0.340674	0.164294	0.292924	10	0.559575	0.835542	58.0273	61.9688	50.6224	54.1815	52.2346	52.6104	-0.0966315
Q922D8	Mthfd1	"C-1-tetrahydrofolate synthase, cytoplasmic OS=Mus musculus OX=10090 GN=Mthfd1 PE=1 SV=4"	87460.6	88063.4	75509.3	59489	72829.4	69406.7	78618.4	51878.8	-0.192847	0.387156	0.528717	18	0.707771	0.340105	42.2255	43.8178	36.0956	34.2772	35.0065	32.3781	-0.260521
Q922F4	Tubb6	Tubulin beta-6 chain OS=Mus musculus OX=10090 GN=Tubb6 PE=1 SV=1	4111.48	5467.41	7271.41	6141.68	6441.23	13076.2	12076.3	16938.4	1.11674	0.0106894	0.060773	2	-0.784053	0.704704	33.7574	38.4451	29.3131	40.3076	32.5594	45.6847	0.218765
Q922J3	Clip1	CAP-Gly domain-containing linker protein 1 OS=Mus musculus OX=10090 GN=Clip1 PE=1 SV=1	5882.29	6494.74	7806.49	6289.2	5663.72	8591.88	6772.58	9212.2	0.255265	0.415411	0.558067	3	-0.466551	0.413714	83.5938	87.6499	77.8706	101.025	93.0927	97.6272	0.228791
Q922P9	Glyr1	Putative oxidoreductase GLYR1 OS=Mus musculus OX=10090 GN=Glyr1 PE=1 SV=1	872.998	1516	867.05	1418.22	1045.2	2118.01	2543.1	2115.48	0.927786	0.0573194	0.153531	1	-0.605753	0.986818	103.812	106.465	100.648	101.479	101.225	103.794	-0.0203988
Q922Q1	Mar.02	Mitochondrial amidoxime reducing component 2 OS=Mus musculus OX=10090 GN=Marc2 PE=1 SV=1	155134	185918	99259.4	124973	76211.2	65267.6	110253	60692.5	-0.981307	0.01091	0.0615865	10	0.888253	0.807645	116.757	116.878	100.209	117.481	119.442	120.136	0.100622
Q922Q8	Lrrc59	Leucine-rich repeat-containing protein 59 OS=Mus musculus OX=10090 GN=Lrrc59 PE=1 SV=1	41308.9	67214.1	41382.4	51244.7	34709.3	47950.8	49175.7	61522.2	0.0765387	0.819079	0.876133	9	0.0996457	1	130.067	161.913	107.177	135.178	140.427	125.194	0.0247879
Q922R8	Pdia6	Protein disulfide-isomerase A6 OS=Mus musculus OX=10090 GN=Pdia6 PE=1 SV=3	298044	292465	274616	288774	341804	398668	341653	392100	0.333095	0.0393236	0.122129	13	-0.804115	0.96566	184.887	190.25	169.519	199.404	176.663	198.01	0.0754265
Q923B6	Steap4	Metalloreductase STEAP4 OS=Mus musculus OX=10090 GN=Steap4 PE=1 SV=1	256432	295774	210986	222873	186942	157619	231413	139093	-0.47788	0.0496382	0.141009	12	0.845241	0.748551	617.126	845.926	610.418	520.867	501.896	435.137	-0.495373
Q923D2	Blvrb	Flavin reductase (NADPH) OS=Mus musculus OX=10090 GN=Blvrb PE=1 SV=3	65613.5	59335	73457.2	95307.2	131526	97115.9	61541.2	68719.2	0.234761	0.395745	0.537903	6	-0.450385	0.982238	41.8609	46.7842	37.3272	42.4951	38.4917	41.6966	-0.0333594
Q925I1	Atad3	ATPase family AAA domain-containing protein 3 OS=Mus musculus OX=10090 GN=Atad3 PE=1 SV=1	12187.6	21019	16122	16093.3	18139.4	6826.9	10178.4	10738	-0.623624	0.0958146	0.20834	5	0.491977
Q93092	Taldo1	Transaldolase OS=Mus musculus OX=10090 GN=Taldo1 PE=1 SV=2	417243	313612	397704	374114	427289	531735	301905	516297	0.284121	0.351791	0.494146	19	-0.476553	0.442794	363.589	420.052	267.377	279.316	298.174	276.625	-0.275255
Q99020	Hnrnpab	Heterogeneous nuclear ribonucleoprotein A/B OS=Mus musculus OX=10090 GN=Hnrnpab PE=1 SV=1	42432.1	49573.8	45128	42528	30239.8	40050.4	34418.4	29511	-0.441403	0.0290771	0.10676	3	0.864598	0.832015	155.066	159.549	156.106	145.958	144.604	149.142	-0.0983543
Q99J39	Mlycd	"Malonyl-CoA decarboxylase, mitochondrial OS=Mus musculus OX=10090 GN=Mlycd PE=1 SV=1"	5727.8	4187.48	5138.24	3711.66	3470.22	2590.5	3484.61	1622.88	-0.629549	0.0208113	0.0896788	1	0.847765	0.991317	41.01	39.7105	34.729	37.7851	41.4578	34.2068	-0.0259639
Q99J47	Dhrs7b	Dehydrogenase/reductase SDR family member 7B OS=Mus musculus OX=10090 GN=Dhrs7b PE=1 SV=1	25099.5	27248.9	14202.4	25630.4	19965.9	18367.4	22632.9	18976.1	-0.381898	0.497566	0.630563	6	0.47352	0.594779	47.4117	50.124	37.9009	49.3138	55.6209	49.0892	0.193349
Q99J77	Nans	Sialic acid synthase OS=Mus musculus OX=10090 GN=Nans PE=1 SV=1	3013.88	2872.74	3445.74	4522.01	1510.41	1438.29	2254.81	987.583	-1.12857	0.00190676	0.0302833	2	0.66805	0.64196	21.2173	21.4765	18.9368	24.9951	20.2007	25.219	0.187124
Q99J99	Mpst	3-mercaptopyruvate sulfurtransferase OS=Mus musculus OX=10090 GN=Mpst PE=1 SV=4	19987.2	14673.4	17900.8	14308.4	14501.6	18381.4	11299.8	14589.3	-0.156051	0.368365	0.510702	5	0.45863	0.442894	46.4393	44.689	38.3396	34.1196	38.6152	33.9344	-0.277194
Q99JB2	Stoml2	"Stomatin-like protein 2, mitochondrial OS=Mus musculus OX=10090 GN=Stoml2 PE=1 SV=1"	5795.78	8665.93	4406.52	4811.93	6880.44	6815.2	4575.6	5917.97	0.266119	0.807447	0.867518	4	0.188656	0.877638	42.104	44.8342	37.2598	37.391	38.3681	39.5178	-0.103693
Q99JI4	Psmd6	26S proteasome non-ATPase regulatory subunit 6 OS=Mus musculus OX=10090 GN=Psmd6 PE=1 SV=1	10001	9833.82	10490.5	10426.6	10716.2	24316.4	14361	20242.5	0.739561	0.0240117	0.0969983	3	-0.657303	0.851828	59.6277	70.8472	57.5905	58.4382	58.5623	58.3299	-0.0951349
Q99JR1	Sfxn1	Sideroflexin-1 OS=Mus musculus OX=10090 GN=Sfxn1 PE=1 SV=3	212328	233063	207154	205788	249739	297692	170931	212205	0.134441	0.665969	0.763486	10	-0.150367	0.403475	272.121	239.849	200.952	177.036	227.062	163.752	-0.331527
Q99JX3	Gorasp2	Golgi reassembly-stacking protein 2 OS=Mus musculus OX=10090 GN=Gorasp2 PE=1 SV=3	14952.6	20423.3	18193	13602.6	13752.5	6529.3	14889.3	12321.1	-0.341474	0.0876292	0.197192	3	0.655436	1	82.0744	88.853	83.489	84.9247	83.7742	85.8186	0.00134747
Q99JX4	Eif3m	Eukaryotic translation initiation factor 3 subunit M OS=Mus musculus OX=10090 GN=Eif3m PE=1 SV=1	5217.4	7624.4	6074.06	9461.21	11060.1	16994.5	10625.2	21062.5	1.0105	0.00575797	0.0451518	2	-0.814318	0.581284	50.7747	53.7334	48.8002	44.8994	46.5496	47.5718	-0.140415
Q99JY0	Hadhb	"Trifunctional enzyme subunit beta, mitochondrial OS=Mus musculus OX=10090 GN=Hadhb PE=1 SV=1"	591350	403086	422849	336937	317979	328802	284701	286862	-0.450972	0.0350954	0.116291	16	0.843299	0.980326	90.7856	101.984	79.2372	84.8853	94.7982	85.8575	-0.0288646
Q99JY3	Gimap4	GTPase IMAP family member 4 OS=Mus musculus OX=10090 GN=Gimap4 PE=1 SV=1	8815.86	10197.8	7630.78	4138.57	7660.9	12251.6	9812.85	11667.5	0.383584	0.147924	0.270795	3	-0.274337	0.730321	31.1643	26.5795	31.7932	34.4743	37.0086	29.9074	0.178319
Q99JY9	Actr3	Actin-related protein 3 OS=Mus musculus OX=10090 GN=Actr3 PE=1 SV=3	58889.1	71167	63707.7	57292.2	51666.4	56010.9	63570.2	61969.7	-0.0560978	0.516091	0.648026	11	0.480882	1	97.7343	104.245	88.4831	98.7	91.1648	99.8644	-0.00155872
Q99K01	Pdxdc1	Pyridoxal-dependent decarboxylase domain-containing protein 1 OS=Mus musculus OX=10090 GN=Pdxdc1 PE=1 SV=2	2937.56	5669.06	5124.05	3628.42	5609.13	10436.5	9045.83	10028.2	1.14331	0.00624189	0.0468277	2	-0.742557	0.936738	133.612	132.084	128.807	132.36	137.436	137.761	0.0468925
Q99K23	Ufsp2	Ufm1-specific protease 2 OS=Mus musculus OX=10090 GN=Ufsp2 PE=1 SV=1	772.429	1534.89	2008.22	1674.51	922.891	496.666	810.374	464.212	-1.33743	0.0112761	0.0634464	2	0.553544	0.909658	27.8013	30.023	28.5032	27.9315	31.1258	31.9112	0.0739072
Q99K28	Arfgap2	ADP-ribosylation factor GTPase-activating protein 2 OS=Mus musculus OX=10090 GN=Arfgap2 PE=1 SV=1	6023.07	8251.25	7526.51	7316.84	5482.89	16424.6	8364.75	18214	0.659455	0.158812	0.285796	4	-0.55276	0.980634	72.573	69.81	60.155	66.9518	71.6132	68.2904	0.0344922
Q99K48	Nono	Non-POU domain-containing octamer-binding protein OS=Mus musculus OX=10090 GN=Nono PE=1 SV=3	10932.5	21083.7	17443.4	23451.3	24276.3	25162.1	30373	34930.2	0.527614	0.0281845	0.105343	7	-0.846389	0.991671	86.43	88.853	82.1392	86.5407	87.4571	87.0831	0.0211079
Q99K51	Pls3	Plastin-3 OS=Mus musculus OX=10090 GN=Pls3 PE=1 SV=3	66110	52781.6	66113.5	70488.9	87223.6	80882.2	87124.3	101038	0.398991	0.0169497	0.0789619	10	-0.92968	0.958611	130.817	128.225	141.006	133.621	110.766	139.57	-0.0651085
Q99K85	Psat1	Phosphoserine aminotransferase OS=Mus musculus OX=10090 GN=Psat1 PE=1 SV=1	81956.4	72510.4	81662	90658.6	107524	78446.3	78922.8	92162.5	0.06005	0.49946	0.63226	11	-0.524489	0.991671	149.455	178.778	146.506	136.36	152.934	142.274	-0.133276
Q99KB8	Hagh	"Hydroxyacylglutathione hydrolase, mitochondrial OS=Mus musculus OX=10090 GN=Hagh PE=1 SV=2"	27247.9	24076.7	35412	27686.2	41756.2	90508	28111.5	81213.2	1.0842	0.0344918	0.115172	3	-0.651318	0.997488	56.751	60.0603	47.3323	55.2851	60.9599	50.4899	0.0256205
Q99KC8	Vwa5a	von Willebrand factor A domain-containing protein 5A OS=Mus musculus OX=10090 GN=Vwa5a PE=1 SV=2	44195.6	27458.1	36687.1	33100.4	22576.5	29727.7	46792.5	33293.9	-0.147528	0.639929	0.743377	10	0.200628	0.850895	80.2308	83.75	72.0666	88.3538	77.0263	89.5343	0.110502
Q99KF1	Tmed9	Transmembrane emp24 domain-containing protein 9 OS=Mus musculus OX=10090 GN=Tmed9 PE=1 SV=2	22129.5	25872.1	21201.8	26806.5	21646.8	24831.3	21323.2	18840.2	-0.155396	0.394428	0.536534	4	0.419438	1	104.359	105.199	93.5278	104.277	94.1556	105.623	0.00477269
Q99KI0	Aco2	"Aconitate hydratase, mitochondrial OS=Mus musculus OX=10090 GN=Aco2 PE=1 SV=1"	2.15275e+06	1.66123e+06	1.95812e+06	1.31889e+06	1.41566e+06	1.57285e+06	1.23935e+06	1.15714e+06	-0.445332	0.0936666	0.204955	37	0.789106	0.740183	376.392	424.221	310.94	321.037	344.742	309.23	-0.178919
Q99KJ8	Dctn2	Dynactin subunit 2 OS=Mus musculus OX=10090 GN=Dctn2 PE=1 SV=3	12467	17390.2	14137	19113	21268.8	25583.9	15881.2	21426.8	0.445202	0.0853554	0.194594	4	-0.697191	0.921316	175.467	172.7	152.259	174.888	188.033	166.962	0.0836451
Q99KK7	Dpp3	Dipeptidyl peptidase 3 OS=Mus musculus OX=10090 GN=Dpp3 PE=1 SV=2	16579.8	13431.1	18859.5	13409.4	11361.9	20651.4	18370	20203	0.368454	0.52574	0.654627	4	-0.29473	0.947981	39.288	38.8185	33.6154	39.2434	35.3525	41.1324	0.0515289
Q99KP3	Cryl1	Lambda-crystallin homolog OS=Mus musculus OX=10090 GN=Cryl1 PE=1 SV=3	338.902	492.884	145.551	1256.72	844.215	2073.37	1104.41	1195.51	1.49132	0.0296852	0.107479	1	-0.679629	0.987589	18.3	16.9128	17.0809	16.0087	16.0976	18.4878	-0.0500233
Q99KQ4	Nampt	Nicotinamide phosphoribosyltransferase OS=Mus musculus OX=10090 GN=Nampt PE=1 SV=1	33092.1	31584.8	35795.6	27175.5	24820.6	29479.7	14414.9	16886.4	-0.659159	0.0344095	0.115172	7	0.749698	0.00317178	143.458	134.925	137.597	100.316	114.251	91.7521	-0.446892
Q99L04	Dhrs1	Dehydrogenase/reductase SDR family member 1 OS=Mus musculus OX=10090 GN=Dhrs1 PE=1 SV=1	28992	42401.3	36370.5	30912.2	28430.9	33574.7	45225.9	34362.2	0.0186244	0.903508	0.935065	8	0.0458273	0.901467	34.8311	34.6697	33.7673	32.3065	29.6922	36.2495	-0.0766021
Q99L13	Hibadh	"3-hydroxyisobutyrate dehydrogenase, mitochondrial OS=Mus musculus OX=10090 GN=Hibadh PE=1 SV=1"	202178	315938	225580	204263	252434	283201	254494	219168	0.239732	0.587032	0.704548	10	0.0290047	0.781155	224.473	229.56	207.093	199.916	214.505	185.015	-0.142545
Q99L20	Gstt3	Glutathione S-transferase theta-3 OS=Mus musculus OX=10090 GN=Gstt3 PE=1 SV=1	5095.93	3441.76	3255.51	3476.15	1355.35	102.48	2537.91	198.852	-2.7361	0.0143816	0.0726627	1	0.871284	0.947981	20.2043	13.5108	18.515	17.6641	13.4033	15.453	-0.15539
Q99L43	Cds2	Phosphatidate cytidylyltransferase 2 OS=Mus musculus OX=10090 GN=Cds2 PE=1 SV=1	7.42283	59.7413	7.42283	356.011	8202.72	7.42283	1320.93	7.42283	2.23334	0.383044	0.52642	1	-0.3877	0.387158	159.483	153.803	153.12	175.834	171.052	177.681	0.169599
Q99L45	Eif2s2	Eukaryotic translation initiation factor 2 subunit 2 OS=Mus musculus OX=10090 GN=Eif2s2 PE=1 SV=1	7819.74	15869.4	7851.26	17284.8	4973.19	5606.71	12324.7	7141.42	-0.818867	0.102866	0.217931	5	0.414581	0.847219	51.2001	54.9781	47.8047	47.4613	47.2911	49.6728	-0.0904596
Q99L47	St13	Hsc70-interacting protein OS=Mus musculus OX=10090 GN=St13 PE=1 SV=1	186710	172254	203613	194094	203586	165884	172918	177878	-0.118289	0.639244	0.743377	9	0.11472	1	262.883	289.614	240.061	269.029	272.542	251.217	0.00374287
Q99L88	Sntb1	Beta-1-syntrophin OS=Mus musculus OX=10090 GN=Sntb1 PE=1 SV=4	61292.6	67826.2	72774.7	47239.1	74147.7	124906	84348.7	97320.4	0.490777	0.024382	0.0978103	13	-0.600867	0.795483	99.5981	114.742	81.2956	90.2851	93.859	78.1731	-0.162653
Q99LB2	Dhrs4	Dehydrogenase/reductase SDR family member 4 OS=Mus musculus OX=10090 GN=Dhrs4 PE=1 SV=3	31099.9	26385.5	29413.8	27021.3	39817.7	35995.4	36997.8	32194.8	0.372331	0.0480294	0.13941	6	-0.703866	0.399938	47.5333	48.257	41.967	51.7181	52.4571	54.906	0.209945
Q99LB6	Mat2b	Methionine adenosyltransferase 2 subunit beta OS=Mus musculus OX=10090 GN=Mat2b PE=1 SV=1	7890.9	5893.2	8739.28	8766.74	6135.11	6258.97	6284.02	7154.55	-0.405045	0.18131	0.311569	3	0.310558	0.841458	57.9665	62.8193	60.6106	58.1032	54.1873	58.2715	-0.0888776
Q99LB7	Sardh	"Sarcosine dehydrogenase, mitochondrial OS=Mus musculus OX=10090 GN=Sardh PE=1 SV=1"	15511.5	9583.65	12602.2	10243.4	9166.61	14581.5	5214.19	13245.7	-0.0441927	0.455086	0.593427	2	0.234104	0.593664	42.651	53.1941	38.4408	34.0802	39.5298	39.1481	-0.241889
Q99LC3	Ndufa10	"NADH dehydrogenase [ubiquinone] 1 alpha subcomplex subunit 10, mitochondrial OS=Mus musculus OX=10090 GN=Ndufa10 PE=1 SV=1"	58239	51076.7	56565.7	46334.7	38822.6	60052.7	39409.7	41761.4	-0.405937	0.218507	0.356565	7	0.581611	0.488189	129.237	138.016	116.541	108.435	118.898	104.164	-0.210094
Q99LC5	Etfa	"Electron transfer flavoprotein subunit alpha, mitochondrial OS=Mus musculus OX=10090 GN=Etfa PE=1 SV=2"	940526	714288	821464	797643	825661	773828	585450	602455	-0.245537	0.220567	0.357709	15	0.558531	1	241.632	246.445	208.257	232.729	242.214	221.822	0.00396335
Q99LD4	Gps1	COP9 signalosome complex subunit 1 OS=Mus musculus OX=10090 GN=Gps1 PE=1 SV=1	18830.1	10924.1	14190.2	11630.6	11135.3	7935.07	11662.3	23514.3	-0.172914	0.728609	0.810969	6	-0.013312	0.901467	38.032	40.2498	37.8334	36.248	37.3052	37.4167	-0.0649653
Q99LD8	Ddah2	"N(G),N(G)-dimethylarginine dimethylaminohydrolase 2 OS=Mus musculus OX=10090 GN=Ddah2 PE=1 SV=1"	15893.8	13852	13201	11373.8	13315.5	10389.1	16838.4	20573.1	0.14706	0.587014	0.704548	2	-0.216538	0.467151	30.1919	25.1689	27.1872	34.7108	31.0764	32.6504	0.256525
Q99LF4	Rtcb	tRNA-splicing ligase RtcB homolog OS=Mus musculus OX=10090 GN=Rtcb PE=1 SV=1	9553.24	9038.43	13464.6	9071.2	15330.4	31422.7	19039.6	28328.3	1.31891	0.00220586	0.0314239	3	-0.769107	0.967784	105.574	98.3953	92.1949	96.1381	95.2679	97.4327	-0.0339869
Q99LP6	Grpel1	"GrpE protein homolog 1, mitochondrial OS=Mus musculus OX=10090 GN=Grpel1 PE=1 SV=1"	6424.82	5710.12	5768.69	5519.39	3353.37	1181.08	2135.1	1042	-1.85368	0.000898186	0.0225588	2	0.901678	0.96566	68.2377	78.647	59.6151	71.2676	78.8801	64.1467	0.0575484
Q99LR1	Abhd12	Monoacylglycerol lipase ABHD12 OS=Mus musculus OX=10090 GN=Abhd12 PE=1 SV=2	3128.84	3776.09	3200.27	3186.95	4839.99	3484.45	5831.64	4793.1	0.592795	0.032191	0.111739	3	-0.654182	0.850895	90.1778	98.6857	84.9568	95.4089	90.2008	107.218	0.0957991
Q99LS3	Psph	Phosphoserine phosphatase OS=Mus musculus OX=10090 GN=Psph PE=1 SV=1	428.843	281.212	259.584	422.891	510.094	1974.01	618.275	950.44	1.15245	0.0100531	0.0596804	1	-0.55042	0.208971	24.2763	29.297	18.0088	16.9349	18.2727	16.7759	-0.434309
Q99LX0	Park7	Protein/nucleic acid deglycase DJ-1 OS=Mus musculus OX=10090 GN=Park7 PE=1 SV=1	341475	323906	356655	361556	468867	499241	404481	492607	0.461654	0.0190975	0.0854798	14	-0.902558	0.739868	144.795	143.659	125.686	126.684	131.529	118.638	-0.134435
Q99LY9	Ndufs5	NADH dehydrogenase [ubiquinone] iron-sulfur protein 5 OS=Mus musculus OX=10090 GN=Ndufs5 PE=1 SV=3	3370.49	3006.69	2501.85	2982.95	3416.46	3032.31	1343.07	2883.19	-0.0184183	0.463276	0.599147	1	0.244814	1	20.7513	22.3477	15.6636	20.3245	20.7197	18.1571	0.0246717
Q99M87	Dnaja3	"DnaJ homolog subfamily A member 3, mitochondrial OS=Mus musculus OX=10090 GN=Dnaja3 PE=1 SV=1"	10205.6	7083.03	8042.34	5712.83	3753.23	6148.74	2545.54	4581.91	-0.86395	0.0147772	0.0740143	2	0.823519	0.594744	66.3739	70.0589	59.4295	57.2164	60.8858	57.4545	-0.155138
Q99MI1	Erc1	ELKS/Rab6-interacting/CAST family member 1 OS=Mus musculus OX=10090 GN=Erc1 PE=1 SV=1	7955.78	5448.63	9232.55	5725.67	6873.36	11422.5	7605.4	9388.7	0.32425	0.221854	0.358985	6	-0.415468	0.966547	48.9514	59.2721	42.1864	49.4715	47.7855	47.7079	-0.0393606
Q99MN1	Kars	Lysine--tRNA ligase OS=Mus musculus OX=10090 GN=Kars PE=1 SV=1	22160.9	19410.1	17035.8	10593	27329.9	66832.5	29595.9	56135.9	1.16447	0.00545474	0.0448185	6	-0.63847	0.997854	68.2984	67.7356	61.0661	66.1832	64.0743	64.9832	-0.011954
Q99MN9	Pccb	"Propionyl-CoA carboxylase beta chain, mitochondrial OS=Mus musculus OX=10090 GN=Pccb PE=1 SV=2"	374332	250338	304003	240399	244813	234992	237764	167768	-0.222912	0.0952796	0.207437	16	0.759888	0.525357	188.655	181.185	163.53	158.984	164.452	153.285	-0.159997
Q99MQ4	Aspn	Asporin OS=Mus musculus OX=10090 GN=Aspn PE=1 SV=1	22154.5	13955.5	15489.4	12807.2	11811.6	23375.6	7935.95	15144.3	-0.136573	0.527554	0.655377	4	0.274317	0.96566	49.3363	46.39	46.0669	59.6601	44.1025	45.8014	0.0642748
Q99MR8	Mccc1	"Methylcrotonoyl-CoA carboxylase subunit alpha, mitochondrial OS=Mus musculus OX=10090 GN=Mccc1 PE=1 SV=2"	1.18838e+06	486749	877642	474917	549961	939487	369236	495271	-0.324631	0.402604	0.544662	33	0.433907	0.214711	176.014	189.897	147.383	129.443	151.154	127.82	-0.326008
Q99MV1	Tdrd1	Tudor domain-containing protein 1 OS=Mus musculus OX=10090 GN=Tdrd1 PE=1 SV=2	8329.28	4556.73	9089.99	18573.7	17751.1	21811.1	8474.56	12383.4	0.768853	0.172984	0.303422	2	-0.593613
Q99N87	Mrps5	"28S ribosomal protein S5, mitochondrial OS=Mus musculus OX=10090 GN=Mrps5 PE=1 SV=1"	3078.43	5633.74	2375.04	2507.54	2457.7	2657.5	2717.62	3106.38	-0.0480265	0.439672	0.579872	2	0.521786	0.389395	24.6612	25.6668	25.4494	21.3493	24.3779	20.7056	-0.19333
Q99P30	Nudt7	Peroxisomal coenzyme A diphosphatase NUDT7 OS=Mus musculus OX=10090 GN=Nudt7 PE=1 SV=2	10309.6	11038.5	5384.03	4041.76	1457.34	1044.33	2810.65	2108.76	-2.08743	0.0010188	0.0241861	2	0.950005	0.376234	67.9338	78.2321	65.0985	51.2451	53.9896	46.9687	-0.470907
Q99P72	Rtn4	Reticulon-4 OS=Mus musculus OX=10090 GN=Rtn4 PE=1 SV=2	69892.6	85384.7	97746.3	145949	108758	199401	119289	234447	0.755484	0.0577904	0.15414	6	-0.751127	0.971132	222.345	284.054	205.085	233.694	214.901	214.371	-0.0889291
Q99PL5	Rrbp1	Ribosome-binding protein 1 OS=Mus musculus OX=10090 GN=Rrbp1 PE=1 SV=2	71956.4	220382	117823	128873	177203	353106	270597	322750	1.26199	0.012508	0.0676225	36	-0.683473	0.387158	291.671	286.875	297.729	342.419	327.786	332.769	0.194757
Q99PT1	Arhgdia	Rho GDP-dissociation inhibitor 1 OS=Mus musculus OX=10090 GN=Arhgdia PE=1 SV=3	536160	447205	612881	760891	817751	1.01753e+06	564395	1.16138e+06	0.670197	0.0636023	0.163153	9	-0.782064	0.913572	320.499	320.999	276.589	325.747	318.22	329.015	0.0870985
Q9CPP6	Ndufa5	NADH dehydrogenase [ubiquinone] 1 alpha subcomplex subunit 5 OS=Mus musculus OX=10090 GN=Ndufa5 PE=1 SV=3	2997.88	1856.28	1904.56	1940.34	277.724	206.576	345.99	51.6344	-3.00465	0.000136927	0.0156936	1	0.933906	0.121176	57.2169	53.6297	54.8572	41.0959	49.2932	40.8406	-0.341589
Q9CPQ1	Cox6c	Cytochrome c oxidase subunit 6C OS=Mus musculus OX=10090 GN=Cox6c PE=1 SV=3	24672.1	48646.9	15917.9	18141.5	32300.9	49824.3	41587.8	29324.9	0.79278	0.117452	0.234229	3	-0.169898	0.145086	153.871	163.303	155.634	130.172	133.827	138.189	-0.23333
Q9CPQ8	Atp5mg	"ATP synthase subunit g, mitochondrial OS=Mus musculus OX=10090 GN=Atp5mg PE=1 SV=1"	19636.8	15399.5	20557.7	17323.8	15009.1	10468	12126	8783.26	-0.711113	0.0106017	0.0606361	2	0.769177
Q9CPR4	Rpl17	60S ribosomal protein L17 OS=Mus musculus OX=10090 GN=Rpl17 PE=1 SV=3	87411.8	109585	45189.2	50623.5	38638	30327	46949.2	43954.6	-0.6908	0.032319	0.111739	3	0.837651	0.882692	208.164	181.765	208.747	187.698	184.548	186.824	-0.0958221
Q9CPT4	Mydgf	Myeloid-derived growth factor OS=Mus musculus OX=10090 GN=Mydgf PE=1 SV=1	16012.2	15164.5	19948.2	20659.3	24144.1	47487.2	34995.6	55536.7	1.18964	0.00306879	0.0354548	1	-0.811332	0.970977	40.6453	42.6146	35.8088	38.4946	38.3186	39.5372	-0.0296132
Q9CPV4	Glod4	Glyoxalase domain-containing protein 4 OS=Mus musculus OX=10090 GN=Glod4 PE=1 SV=1	52915.9	22257.9	39701	38489.4	27584.2	16468.2	19143.2	19014.9	-1.03484	0.0159576	0.077845	9	0.659214	1	45.6492	45.2491	44.4978	45.4906	42.3476	46.6574	-0.0107533
Q9CPY7	Lap3	Cytosol aminopeptidase OS=Mus musculus OX=10090 GN=Lap3 PE=1 SV=3	72751.8	54616.5	81330.9	68059.7	94513.4	101168	69738.6	87946.3	0.373678	0.102607	0.217915	12	-0.68429	0.973294	90.4412	95.0555	64.7442	79.0717	81.6732	80.8578	-0.0306968
Q9CPZ6	Ormdl3	ORM1-like protein 3 OS=Mus musculus OX=10090 GN=Ormdl3 PE=2 SV=1	7913.19	7204.16	6385.52	5992.71	3616.59	4327.95	5622.27	6042.77	-0.459398	0.0390223	0.121848	1	0.797055	0.269247	208.347	196.743	163.462	223.348	243.474	227.231	0.294323
Q9CPZ8	Cmc1	COX assembly mitochondrial protein homolog OS=Mus musculus OX=10090 GN=Cmc1 PE=1 SV=1	2293.1	3287.62	2447.37	2593.75	2686.68	4189.65	1162.13	2361.21	-0.000458762	0.67147	0.767584	1	0.0784797	0.748882	20.7716	22.0988	20.3878	18.275	20.7939	17.5735	-0.162284
Q9CQ22	Lamtor1	Ragulator complex protein LAMTOR1 OS=Mus musculus OX=10090 GN=Lamtor1 PE=1 SV=1	2489.3	4378.01	2845.71	3526.66	5429.19	5779.94	5251.72	7455.05	0.82235	0.00376508	0.0381572	1	-0.828632	0.706819	92.4873	108.166	79.929	80.3723	87.3583	77.3755	-0.185875
Q9CQ60	Pgls	6-phosphogluconolactonase OS=Mus musculus OX=10090 GN=Pgls PE=1 SV=1	40930.3	39630.4	32595.7	36369.2	42533.9	53687.8	48036.3	50495.3	0.375476	0.0405156	0.124713	7	-0.663052	0.990069	43.2992	41.8471	34.9989	38.0019	45.1654	39.3427	0.0302016
Q9CQ62	Decr1	"2,4-dienoyl-CoA reductase, mitochondrial OS=Mus musculus OX=10090 GN=Decr1 PE=1 SV=1"	191869	180355	182700	146640	176931	198547	165620	163673	-0.0846244	0.953368	0.971303	6	0.273551	0.991184	207.334	226.49	175.509	206.479	202.567	187.038	-0.0250727
Q9CQ65	Mtap	S-methyl-5'-thioadenosine phosphorylase OS=Mus musculus OX=10090 GN=Mtap PE=1 SV=1	11989.9	14423.6	14215.5	18017.9	16724.6	19157.6	17897	19931.6	0.370871	0.0816792	0.190163	4	-0.883215	0.781633	30.3742	35.5824	27.6933	29.7643	27.8878	26.6002	-0.146298
Q9CQ69	Uqcrq	Cytochrome b-c1 complex subunit 8 OS=Mus musculus OX=10090 GN=Uqcrq PE=1 SV=3	29498.3	28848.5	22526.7	24335.1	16890.9	18526.6	13330.2	18559.9	-0.582847	0.00643967	0.0480453	3	0.909096	0.48221	121.255	127.25	90.862	93.655	104.141	85.7213	-0.248586
Q9CQ75	Ndufa2	NADH dehydrogenase [ubiquinone] 1 alpha subcomplex subunit 2 OS=Mus musculus OX=10090 GN=Ndufa2 PE=1 SV=3	65684.5	64066.2	42991.1	44781.3	50389.3	63471.8	42549.9	41612.7	-0.210094	0.579279	0.697147	5	0.540782	0.585641	104.197	101.154	90.0016	88.0581	94.3286	81.8499	-0.16018
Q9CQ92	Fis1	Mitochondrial fission 1 protein OS=Mus musculus OX=10090 GN=Fis1 PE=1 SV=1	22503.9	20048.5	22994	31392.1	22121.4	12515.8	18017.5	16503.7	-0.39962	0.0578069	0.15414	4	0.404312	0.996614	78.6912	75.7013	68.4729	74.5587	74.7523	71.1307	-0.0136952
Q9CQA3	Sdhb	"Succinate dehydrogenase [ubiquinone] iron-sulfur subunit, mitochondrial OS=Mus musculus OX=10090 GN=Sdhb PE=1 SV=1"	279247	206747	228038	199068	201735	187862	140381	163352	-0.309742	0.0650161	0.166137	12	0.768507	0.386795	160.901	170.17	136.939	127.591	143.393	124.435	-0.239931
Q9CQC6	Bzw1	Basic leucine zipper and W2 domain-containing protein 1 OS=Mus musculus OX=10090 GN=Bzw1 PE=1 SV=1	9239.77	8471.2	7078.77	9359.53	7543.71	9138.85	7590.35	9034.88	-0.0953752	0.846282	0.895365	3	0.104213	0.505353	158.105	171.829	147.67	141.622	136.324	145.776	-0.170465
Q9CQC7	Ndufb4	NADH dehydrogenase [ubiquinone] 1 beta subcomplex subunit 4 OS=Mus musculus OX=10090 GN=Ndufb4 PE=1 SV=3	37283.9	42241.9	22010.6	28042.3	38278.9	34028.3	18071.8	6989.73	-0.38284	0.249432	0.388966	4	0.553859	0.853398	9.79138	9.44496	9.43787	9.09145	9.15193	8.1188	-0.123221
Q9CQC9	Sar1b	GTP-binding protein SAR1b OS=Mus musculus OX=10090 GN=Sar1b PE=1 SV=1	30360.1	29758.1	18885.4	27946.5	14018.4	12119.9	21444.4	16297.7	-0.931975	0.0127073	0.0680176	2	0.819889	0.990685	35.2768	38.5073	34.3409	35.8144	33.8942	36.5996	-0.0234577
Q9CQD1	Rab5a	Ras-related protein Rab-5A OS=Mus musculus OX=10090 GN=Rab5a PE=1 SV=1	16570.1	17118.8	15313.7	16856	18632	18399	18050	19419	0.147783	0.228827	0.367864	4	-0.790067	1	42.104	47.2613	42.76	43.8549	41.9027	46.852	0.00567102
Q9CQF9	Pcyox1	Prenylcysteine oxidase OS=Mus musculus OX=10090 GN=Pcyox1 PE=1 SV=1	30940.5	26292.3	33025	42006	43474.8	48560.6	40353	52704.2	0.523456	0.0295776	0.107459	7	-0.921522	0.78448	152.271	176.351	137.007	174.179	157.086	192.738	0.173144
Q9CQH3	Ndufb5	"NADH dehydrogenase [ubiquinone] 1 beta subcomplex subunit 5, mitochondrial OS=Mus musculus OX=10090 GN=Ndufb5 PE=1 SV=1"	1825.43	4681.98	1440.05	1996.46	341.287	306.509	608.526	539.213	-2.15385	0.000236786	0.0156936	1	0.803685	0.231897	86.5718	91.9231	77.027	72.0953	76.705	67.3371	-0.239687
Q9CQI3	Gmfb	Glia maturation factor beta OS=Mus musculus OX=10090 GN=Gmfb PE=1 SV=3	10910.6	13889.1	10805.4	10220	12122.3	14750.3	11173.1	17156.6	0.300459	0.219529	0.357561	2	-0.438116	1	83.3709	93.3752	84.1132	86.5407	87.0616	88.3671	0.0080027
Q9CQI6	Cotl1	Coactosin-like protein OS=Mus musculus OX=10090 GN=Cotl1 PE=1 SV=3	29440.5	13901	10535.7	14370.2	22141	28008.2	26998.2	28651.6	0.960223	0.0394868	0.122239	2	-0.437821	0.448934	54.6644	60.6204	47.5685	65.592	56.3377	133.831	0.549851
Q9CQJ6	Denr	Density-regulated protein OS=Mus musculus OX=10090 GN=Denr PE=1 SV=1	5254.89	6457.43	2527.08	6071.11	7504.59	11348.1	14246.2	20401.8	1.17063	0.00619351	0.0468277	2	-0.735343	0.919381	43.6234	44.3986	42.625	42.2981	41.9274	39.3427	-0.0809126
Q9CQM9	Glrx3	Glutaredoxin-3 OS=Mus musculus OX=10090 GN=Glrx3 PE=1 SV=1	7184.81	7982.64	6638.14	8750.99	6620.93	2411.27	5051.01	2515.39	-1.08723	0.0165999	0.0789619	2	0.70374	0.0700887	113.415	118.372	102.116	89.5953	95.0207	78.212	-0.347288
Q9CQN1	Trap1	"Heat shock protein 75 kDa, mitochondrial OS=Mus musculus OX=10090 GN=Trap1 PE=1 SV=1"	69906.7	70180.5	62317.2	65968.3	74323.6	69059.7	63648.6	47778.2	-0.034617	0.621118	0.729761	13	0.395532	1	161.407	169.547	135.961	150.096	172.312	144.375	0.00171924
Q9CQQ7	Atp5pb	"ATP synthase F(0) complex subunit B1, mitochondrial OS=Mus musculus OX=10090 GN=Atp5pb PE=1 SV=1"	100057	81942.3	82171.3	67796.7	65030.6	62065.7	42911.7	68028.5	-0.369164	0.0442915	0.13234	5	0.794128
Q9CQR2	Rps21	40S ribosomal protein S21 OS=Mus musculus OX=10090 GN=Rps21 PE=1 SV=1	38216.4	43799.5	35259	34728.2	39764.6	79889.7	39751.4	62774.6	0.444742	0.0909959	0.200631	4	-0.489157	0.844587	197.427	178.384	185.362	169.764	176.687	177.564	-0.0978606
Q9CQS8	Sec61b	Protein transport protein Sec61 subunit beta OS=Mus musculus OX=10090 GN=Sec61b PE=1 SV=3	40802.2	69578.1	44524.3	38257.6	56582.4	4611.81	61202.5	102647	0.465351	0.662879	0.763019	2	-0.174618	0.938232	26.7479	27.1396	22.2268	24.7192	24.106	23.7405	-0.0632495
Q9CQT1	Mri1	Methylthioribose-1-phosphate isomerase OS=Mus musculus OX=10090 GN=Mri1 PE=1 SV=1	6958.18	8410.7	9760.61	7029.52	12038.6	16954.2	9947.12	8512.41	0.509109	0.0601595	0.157725	4	-0.507861	0.992257	16.4565	15.7096	15.7817	16.0087	15.3313	15.8421	-0.023155
Q9CQU0	Txndc12	Thioredoxin domain-containing protein 12 OS=Mus musculus OX=10090 GN=Txndc12 PE=1 SV=1	7554.25	7979.25	9384.36	8408.11	8313.17	15943.2	9541.81	11940.3	0.381997	0.0976312	0.210966	2	-0.574939	1	36.0871	35.292	35.5219	37.0559	35.1548	34.7904	0.000859805
Q9CQU3	Rer1	Protein RER1 OS=Mus musculus OX=10090 GN=Rer1 PE=1 SV=1	3523.75	3737.97	661.028	2894.02	323.875	1527.66	1364.2	1052.77	-1.41397	0.0877646	0.197192	1	0.762901	0.992257	124.131	129.138	110.805	117.264	120.653	121.439	-0.0159809
Q9CQV4	Retreg3	Reticulophagy regulator 3 OS=Mus musculus OX=10090 GN=Retreg3 PE=1 SV=1	1423.91	1415.55	1854.79	2262.19	665.947	275.434	619.607	529.054	-1.5051	0.00031695	0.0156936	1	0.682949	0.996614	75.4903	75.4524	73.7876	74.4996	75.3455	76.6751	0.0114259
Q9CQV8	Ywhab	14-3-3 protein beta/alpha OS=Mus musculus OX=10090 GN=Ywhab PE=1 SV=3	555409	433489	709313	632661	986433	1.43254e+06	685986	1.44888e+06	1.00387	0.010292	0.0596804	11	-0.794256	0.921316	757.235	769.588	692.061	759.817	820.011	744.302	0.0671516
Q9CQW0	Emc6	ER membrane protein complex subunit 6 OS=Mus musculus OX=10090 GN=Emc6 PE=1 SV=1	7.42283	8.52081	7.42283	7.42283	7.42283	151.006	11.1625	798.177	2.46756	0.0625507	0.16131	1	-0.528875	0.791626	50.2277	55.6834	44.6834	45.9045	45.2643	44.3618	-0.146381
Q9CQW1	Ykt6	Synaptobrevin homolog YKT6 OS=Mus musculus OX=10090 GN=Ykt6 PE=1 SV=1	13852.7	13648.3	11999.5	10609.6	9285.4	3929.64	8877.25	6270.89	-0.778387	0.0127165	0.0680176	2	0.874205	0.841541	89.9347	99.3495	80.0808	86.3633	82.0193	82.7448	-0.0959324
Q9CQW9	Ifitm3	Interferon-induced transmembrane protein 3 OS=Mus musculus OX=10090 GN=Ifitm3 PE=1 SV=1	341.491	557.315	145.155	332.023	100.814	935.599	996.496	753.362	1.31805	0.354003	0.495788	1	-0.401275	0.874293	128.021	124.284	126.108	141.149	125.522	139.473	0.100159
Q9CQX2	Cyb5b	Cytochrome b5 type B OS=Mus musculus OX=10090 GN=Cyb5b PE=1 SV=1	90862.1	152208	83813.8	92932.9	126523	239204	146763	189571	0.86011	0.0237895	0.0966857	8	-0.556933	0.555126	472.257	643.216	397.915	402.092	425.025	382.377	-0.295755
Q9CQY5	Magt1	Magnesium transporter protein 1 OS=Mus musculus OX=10090 GN=Magt1 PE=1 SV=1	19269.9	16669.3	16356.1	13527.8	10064.1	11832.3	15340.8	12990.6	-0.413409	0.0704089	0.174812	4	0.824313	0.841167	63.2743	66.7814	61.9603	56.8223	56.4119	57.2405	-0.170973
Q9CQZ5	Ndufa6	NADH dehydrogenase [ubiquinone] 1 alpha subcomplex subunit 6 OS=Mus musculus OX=10090 GN=Ndufa6 PE=1 SV=1	15159.6	12544.3	10878.6	15286.4	11311.8	26538.4	8969.62	13684.3	-0.148457	0.869751	0.911845	2	-0.121629	0.565917	85.9032	88.936	81.3125	73.9281	79.3251	74.0683	-0.172067
Q9CQZ6	Ndufb3	NADH dehydrogenase [ubiquinone] 1 beta subcomplex subunit 3 OS=Mus musculus OX=10090 GN=Ndufb3 PE=1 SV=1	8486.66	21437.6	8797.69	10900.4	7776.7	6574.7	6741.18	3250.33	-0.556755	0.0278991	0.104879	1	0.710302	0.376832	98.8283	103.664	82.6622	80.195	84.6393	75.8386	-0.239409
Q9CR00	Psmd9	26S proteasome non-ATPase regulatory subunit 9 OS=Mus musculus OX=10090 GN=Psmd9 PE=1 SV=1	21824.6	24926.6	17232.9	17687.3	30036.3	42426.7	29118.9	32721.2	0.674132	0.00613518	0.0468277	6	-0.648263	0.758048	24.8436	22.8041	23.0198	23.1033	21.6837	20.9196	-0.105159
Q9CR09	Ufc1	Ubiquitin-fold modifier-conjugating enzyme 1 OS=Mus musculus OX=10090 GN=Ufc1 PE=1 SV=1	4716.92	5235.41	5053.73	4170.22	8860.3	11396.7	7004.4	11687.7	1.04136	0.00104935	0.0245746	1	-0.80602	0.876627	72.026	69.6233	61.5554	62.2417	65.3844	63.5047	-0.085428
Q9CR16	Ppid	Peptidyl-prolyl cis-trans isomerase D OS=Mus musculus OX=10090 GN=Ppid PE=1 SV=3	8882.61	10200.5	10455	9180.86	7426.82	8328.28	8872.57	9924.04	-0.170914	0.31822	0.46033	6	0.434677	0.905616	39.5919	33.0724	42.3551	36.1888	38.986	31.5999	-0.104982
Q9CR26	Vta1	Vacuolar protein sorting-associated protein VTA1 homolog OS=Mus musculus OX=10090 GN=Vta1 PE=1 SV=1	50876.5	29614.4	46652.7	53274.3	62576.8	74295.8	37646.6	87358.5	0.484974	0.131055	0.250959	1	-0.677364	0.992257	23.0203	24.6503	21.6869	25.3499	20.695	22.3009	-0.0243253
Q9CR51	Atp6v1g1	V-type proton ATPase subunit G 1 OS=Mus musculus OX=10090 GN=Atp6v1g1 PE=1 SV=3	29740.2	31673.9	23370.6	20050.1	23777	69166.4	22572.8	70913.6	0.621265	0.167502	0.297114	4	-0.461409	0.589083	46.0139	43.1125	37.0067	38.061	36.1682	37.0082	-0.175694
Q9CR57	Rpl14	60S ribosomal protein L14 OS=Mus musculus OX=10090 GN=Rpl14 PE=1 SV=3	100432	134202	76556.4	83539.6	75626.7	70877.3	91978.6	88385.8	-0.163947	0.280976	0.423051	5	0.635564	0.833975	191.005	194.627	193.14	177.076	181.062	183.731	-0.0951734
Q9CR61	Ndufb7	NADH dehydrogenase [ubiquinone] 1 beta subcomplex subunit 7 OS=Mus musculus OX=10090 GN=Ndufb7 PE=1 SV=3	14654.4	27298.1	6916.97	16878.6	6716.07	28313.2	12950.5	14367.4	-0.205363	0.849207	0.897875	3	0.197158	0.535508	72.6338	73.3365	64.3393	63.2665	60.6139	59.9835	-0.191739
Q9CR62	Slc25a11	Mitochondrial 2-oxoglutarate/malate carrier protein OS=Mus musculus OX=10090 GN=Slc25a11 PE=1 SV=3	14472.8	20788.8	16514	16262.9	19916.8	11450	12890.8	14511.4	-0.26087	0.315401	0.458092	5	0.365522	0.909733	70.223	77.1327	62.264	64.8037	62.7643	68.5044	-0.0918229
Q9CR68	Uqcrfs1	"Cytochrome b-c1 complex subunit Rieske, mitochondrial OS=Mus musculus OX=10090 GN=Uqcrfs1 PE=1 SV=1"	165917	151031	163675	145136	139895	186368	92654.6	121573	-0.269758	0.285343	0.426035	8	0.424749	0.560646	134.24	150.649	113.116	108.002	119.392	113.035	-0.216762
Q9CR70	Lage3	EKC/KEOPS complex subunit Lage3 OS=Mus musculus OX=10090 GN=Lage3 PE=2 SV=1	7.42283	754.244	843.318	7.42283	512.851	7.42283	880.038	204.787	2.11476	0.619204	0.728834	1	0.0729892	0.919381	23.6483	23.6961	20.624	21.3493	22.3511	20.2776	-0.0854284
Q9CR86	Carhsp1	Calcium-regulated heat stable protein 1 OS=Mus musculus OX=10090 GN=Carhsp1 PE=1 SV=1	3865.05	9885.42	7719.8	7369.14	6542.91	7748.42	5111.89	8523.62	-0.0831125	0.985295	0.991952	2	-0.0492744	0.586398	157.396	150.318	135.488	166.926	158.273	171.319	0.165911
Q9CR98	Fam136a	Protein FAM136A OS=Mus musculus OX=10090 GN=Fam136a PE=1 SV=1	3319.96	2386.92	3362.1	2630.56	4572.68	10457.4	4026.41	8589.29	1.08452	0.00750996	0.051722	1	-0.673779	0.523056	25.6944	28.4257	22.1087	22.8274	22.9196	20.4138	-0.198793
Q9CRB6	Tppp3	Tubulin polymerization-promoting protein family member 3 OS=Mus musculus OX=10090 GN=Tppp3 PE=1 SV=1	62335	54230	56936	52841.8	66671.4	169261	88044	208691	1.13548	0.0138267	0.070697	7	-0.671159	0.833975	71.236	83.1069	85.3449	104.435	81.08	84.8069	0.16906
Q9CRB9	Chchd3	MICOS complex subunit Mic19 OS=Mus musculus OX=10090 GN=Chchd3 PE=1 SV=1	57429.4	56469.4	67956.4	57618.8	64181.8	85637.4	32513.9	66886.7	0.187777	0.941413	0.962519	9	-0.140302	0.682545	87.5442	96.798	73.9226	76.2338	81.1047	71.5003	-0.167612
Q9CRC0	Vkorc1	Vitamin K epoxide reductase complex subunit 1 OS=Mus musculus OX=10090 GN=Vkorc1 PE=1 SV=1	5310.06	6790.66	4178.44	4423.42	1542.94	901.251	6695.69	1530.97	-1.65688	0.0344303	0.115172	1	0.663269	0.876645	13.8229	13.0337	14.82	13.8015	12.563	12.5933	-0.0967333
Q9CRD0	Ociad1	OCIA domain-containing protein 1 OS=Mus musculus OX=10090 GN=Ociad1 PE=1 SV=1	2687.34	3336.93	2382.4	1725.93	5118.75	8794.11	4443.74	13103.6	1.40687	0.00265309	0.0339486	2	-0.704118	1	139.285	138.971	126.597	131.808	138.499	136.633	0.00851901
Q9CRD2	Emc2	ER membrane protein complex subunit 2 OS=Mus musculus OX=10090 GN=Emc2 PE=1 SV=1	8822.26	9572.7	6318.29	8905.61	8190.11	10073.8	6432.64	9981.97	0.0286724	0.859911	0.906463	2	-0.0460558	0.748139	94.3309	102.897	86.2391	87.0728	93.1916	80.138	-0.12143
Q9CSN1	Snw1	SNW domain-containing protein 1 OS=Mus musculus OX=10090 GN=Snw1 PE=1 SV=3	1296.71	2270.53	1504.8	1547.81	1184.37	2610.41	1869.83	6827.22	0.533689	0.229946	0.368978	3	-0.479356	0.908985	58.8579	58.3178	57.9279	57.512	54.212	55.4701	-0.0670817
Q9CSU0	Rprd1b	Regulation of nuclear pre-mRNA domain-containing protein 1B OS=Mus musculus OX=10090 GN=Rprd1b PE=1 SV=2	927.589	1460.68	831.168	804.774	2058.91	2459.5	975.874	1692.49	1.08813	0.0355899	0.116842	1	-0.533124	0.605997	30.6376	28.5917	31.1184	28.0892	27.8137	26.9698	-0.123835
Q9CT10	Ranbp3	Ran-binding protein 3 OS=Mus musculus OX=10090 GN=Ranbp3 PE=1 SV=2	2054.83	2242.88	2011.75	2282.62	677.927	514.923	1464.51	1325.71	-1.1792	0.00545323	0.0448185	2	0.773825	0.959884	48.0195	47.0746	44.2785	48.9985	48.9966	45.4707	0.0417274
Q9CVB6	Arpc2	Actin-related protein 2/3 complex subunit 2 OS=Mus musculus OX=10090 GN=Arpc2 PE=1 SV=3	25967.5	23746.6	20569.9	24673.2	22705.7	19578.5	25680.1	29613.9	-0.00347898	0.881207	0.919136	5	-0.133618	0.905086	147.571	152.35	142.305	157.822	146.903	159.18	0.0686779
Q9CW03	Smc3	Structural maintenance of chromosomes protein 3 OS=Mus musculus OX=10090 GN=Smc3 PE=1 SV=2	1743.04	2029.67	2920.66	1718.82	2530.73	5578.06	2654.56	3674.92	0.731665	0.0357492	0.117046	2	-0.580168	0.915791	50.6734	53.8371	49.5594	49.4912	47.6124	49.8868	-0.0672738
Q9CWF2	Tubb2b	Tubulin beta-2B chain OS=Mus musculus OX=10090 GN=Tubb2b PE=1 SV=1	1456.15	7.82894	11.8269	1431.75	40.2961	543.744	249.599	1999.98	1.50134	0.487793	0.621578	1	-0.125215	0.818083	3.34912	2.93134	2.25041	4.63762	2.15686	5.9983	0.480449
Q9CWJ9	Atic	Bifunctional purine biosynthesis protein PURH OS=Mus musculus OX=10090 GN=Atic PE=1 SV=2	112390	75824.2	125818	126717	138019	133929	97615.3	125919	0.127061	0.420419	0.562631	14	-0.551034	0.991184	41.557	46.639	37.4453	38.8887	41.0623	43.0195	-0.0264191
Q9CWK8	Snx2	Sorting nexin-2 OS=Mus musculus OX=10090 GN=Snx2 PE=1 SV=2	54481.4	39050.6	57350.3	62329.6	70078.3	93774	45318	95042.8	0.536295	0.122909	0.242323	8	-0.686037	0.399938	90.2791	96.4661	86.914	84.1758	74.3074	83.6397	-0.177634
Q9CWN7	Cnot11	CCR4-NOT transcription complex subunit 11 OS=Mus musculus OX=10090 GN=Cnot11 PE=1 SV=1	85.8423	7.42283	166.903	7.42283	109.692	7.42283	188.543	2189.47	2.51024	0.237455	0.376495	1	-0.488173	0.896614	19.5155	18.4064	19.696	17.7626	18.075	18.8769	-0.0744243
Q9CWZ7	Napg	Gamma-soluble NSF attachment protein OS=Mus musculus OX=10090 GN=Napg PE=1 SV=1	4283.67	8192.43	8957.72	6521.32	2756.08	804.708	4706.13	83.5424	-2.29515	0.0332672	0.113352	2	0.724252	0.921316	34.4462	33.6117	36.0956	35.5779	32.6336	31.8139	-0.0593779
Q9CX30	Yif1b	Protein YIF1B OS=Mus musculus OX=10090 GN=Yif1b PE=1 SV=2	1127.66	2316.56	2203.89	2702.77	4363.28	11114.5	3868.25	10681.6	1.59521	0.00323048	0.0361189	1	-0.746482	0.851257	30.4147	31.1224	25.4831	29.9417	30.582	32.7477	0.104655
Q9CX34	Sugt1	Protein SGT1 homolog OS=Mus musculus OX=10090 GN=Sugt1 PE=1 SV=3	11161.3	10936.4	10592.8	8425.04	9329.71	14117.7	12861.7	15918.4	0.324186	0.150781	0.274191	3	-0.473676	0.552698	55.7988	55.0195	55.5152	50.6539	49.9606	51.7155	-0.127001
Q9CX80	Cygb	Cytoglobin OS=Mus musculus OX=10090 GN=Cygb PE=1 SV=1	5235.08	2999.21	5259.98	5127.44	5251.71	5926.94	4959.59	6546.24	0.106812	0.19992	0.3341	1	-0.671587	0.772774	71.317	57.0732	70.4638	77.4754	73.9119	69.5355	0.157784
Q9CX86	Hnrnpa0	Heterogeneous nuclear ribonucleoprotein A0 OS=Mus musculus OX=10090 GN=Hnrnpa0 PE=1 SV=1	18.9915	373.311	1380.78	436.604	1837.07	2543.68	2931.8	3107.94	2.75793	0.0165746	0.0789619	1	-0.892606	0.998272	61.0864	55.3307	57.7592	57.039	57.8949	60.8395	0.0138043
Q9CXA2	L3hypdh	Trans-L-3-hydroxyproline dehydratase OS=Mus musculus OX=10090 GN=L3hypdh PE=1 SV=1	7355.21	6848.52	8486.83	8109.23	9037.55	6245.26	11632.2	6720.17	0.0130486	0.709097	0.796929	3	-0.22794	0.893039	23.7496	23.8413	20.101	24.2266	27.0227	21.2503	0.0965392
Q9CXR1	Dhrs7	Dehydrogenase/reductase SDR family member 7 OS=Mus musculus OX=10090 GN=Dhrs7 PE=1 SV=2	159509	127463	121169	105598	81802.5	89962.3	96225	80779.7	-0.534749	0.0133229	0.0698095	7	0.942337	0.181038	98.1395	99.4739	67.9668	67.9371	66.5708	68.2709	-0.367874
Q9CXS4	Cenpv	Centromere protein V OS=Mus musculus OX=10090 GN=Cenpv PE=1 SV=2	39606.5	98432.9	19914.8	65460.6	33943.5	35224.6	66947.5	44538	-0.362372	0.793971	0.856224	10	0.304102	0.90079	20.5487	14.4235	18.6668	21.034	22.6971	16.2312	0.162017
Q9CXT8	Pmpcb	Mitochondrial-processing peptidase subunit beta OS=Mus musculus OX=10090 GN=Pmpcb PE=1 SV=1	11867.7	17332.5	15039.5	12056.2	14388.5	13354.8	12394.6	12555.5	-0.0564281	0.665003	0.763486	5	0.356429	0.927188	89.1244	95.3044	77.8537	83.6043	88.6436	77.3949	-0.0684322
Q9CXW3	Cacybp	Calcyclin-binding protein OS=Mus musculus OX=10090 GN=Cacybp PE=1 SV=1	10999.4	7317.75	9397.78	7422.23	11436.4	17029.2	10149.8	14460	0.622689	0.0303552	0.108465	3	-0.612551	0.70557	39.3691	42.0753	35.2182	35.9326	35.921	32.8644	-0.153236
Q9CXW4	Rpl11	60S ribosomal protein L11 OS=Mus musculus OX=10090 GN=Rpl11 PE=1 SV=4	102089	87204.8	80282.7	82270.8	90795.6	115728	89177.3	106195	0.213242	0.285416	0.426035	5	-0.35224	0.926082	233.143	228.585	220.81	220.668	222.712	206.064	-0.0722009
Q9CXY6	Ilf2	Interleukin enhancer-binding factor 2 OS=Mus musculus OX=10090 GN=Ilf2 PE=1 SV=1	2670.27	1611.41	523.931	1247.57	1383.95	1567.53	999.959	1079.87	-0.213899	0.886793	0.924061	1	0.467082	0.703715	45.1023	46.6597	46.7418	42.0419	42.1746	41.8912	-0.135082
Q9CXZ1	Ndufs4	"NADH dehydrogenase [ubiquinone] iron-sulfur protein 4, mitochondrial OS=Mus musculus OX=10090 GN=Ndufs4 PE=1 SV=3"	8657.78	4480.98	4082.05	5470.92	1736.74	903.642	1441.81	581.677	-2.11695	0.00020996	0.0156936	1	0.877728	0.0521977	82.4795	86.5919	73.0452	62.9906	69.9571	60.2558	-0.324783
Q9CY27	Tecr	Very-long-chain enoyl-CoA reductase OS=Mus musculus OX=10090 GN=Tecr PE=1 SV=1	43209.5	47712.5	23285.7	23328.4	24009.1	31174.7	32376.3	17611.2	-0.214739	0.3033	0.445439	7	0.729863	0.841167	115.076	118.724	101.205	117.737	130.218	111.751	0.103106
Q9CY50	Ssr1	Translocon-associated protein subunit alpha OS=Mus musculus OX=10090 GN=Ssr1 PE=1 SV=1	111.061	1284.81	2521.29	1871.18	822.696	530.388	577.394	1792.41	-1.16972	0.880743	0.919136	1	-0.0011276	0.539146	132.316	143.513	127.289	120.575	116.179	120.038	-0.1745
Q9CY57	Chtop	Chromatin target of PRMT1 protein OS=Mus musculus OX=10090 GN=Chtop PE=1 SV=2	18466.3	12337.9	7732.21	9152.41	6204.51	12043.2	11824.2	18587.3	0.167317	0.986516	0.992242	2	0.118821	0.757024	78.6304	72.569	75.2892	70.6173	72.8985	69.0491	-0.0911164
Q9CY58	Serbp1	Plasminogen activator inhibitor 1 RNA-binding protein OS=Mus musculus OX=10090 GN=Serbp1 PE=1 SV=2	52914.6	100446	32594.5	70651.9	42086.4	53501.6	49700.3	103591	-0.245779	0.961683	0.976903	6	0.0295858	0.970276	149.759	151.479	127.963	139.612	135.014	143.15	-0.0351448
Q9CY64	Blvra	Biliverdin reductase A OS=Mus musculus OX=10090 GN=Blvra PE=1 SV=1	10615.9	10939.1	9740.34	9798.64	11158.4	6104.34	15076.4	10539.9	0.0885495	0.975014	0.984817	3	-0.0272707	0.811395	27.8824	32.9064	25.4831	31.9321	30.063	32.5337	0.139222
Q9CYG7	Tomm34	Mitochondrial import receptor subunit TOM34 OS=Mus musculus OX=10090 GN=Tomm34 PE=1 SV=1	5232.03	5667.78	5165.15	4398.95	5759.3	12005.1	6794.45	13266	0.796875	0.0226023	0.0950723	3	-0.642358	0.84656	33.9802	30.6661	33.3961	35.2626	37.8984	32.0279	0.0995295
Q9CYH2	Prxl2a	Peroxiredoxin-like 2A OS=Mus musculus OX=10090 GN=Prxl2a PE=1 SV=2	162078	131515	104205	137470	142024	102395	141031	106423	-0.134265	0.565939	0.684721	9	0.4037	0.51258	294.669	314.942	247.586	331.127	391.137	314.054	0.274654
Q9CYN2	Spcs2	Signal peptidase complex subunit 2 OS=Mus musculus OX=10090 GN=Spcs2 PE=1 SV=1	6166.54	5856.05	7405.26	6788.54	8085.97	2441.23	3923.51	9619.74	-0.199998	0.456723	0.595113	4	-0.0697038	0.768256	58.3109	61.388	64.7611	55.9551	52.7784	60.392	-0.126091
Q9CYR6	Pgm3	Phosphoacetylglucosamine mutase OS=Mus musculus OX=10090 GN=Pgm3 PE=1 SV=1	2868.7	2876.06	3158.41	2803.87	3750.48	5762.08	3299.42	6905.06	0.694587	0.0237869	0.0966857	2	-0.703487	0.909658	16.497	14.1124	14.82	13.9788	14.6145	14.1301	-0.085764
Q9CYZ2	Tpd52l2	Tumor protein D54 OS=Mus musculus OX=10090 GN=Tpd52l2 PE=1 SV=1	24420.9	15275.1	25547.9	23760.9	20494.7	32903	17206.1	36856.1	0.108382	0.458749	0.595175	4	-0.459052	0.959346	72.0058	72.7142	73.5682	76.5097	71.712	75.8386	0.0371194
Q9CZ04	Cops7a	COP9 signalosome complex subunit 7a OS=Mus musculus OX=10090 GN=Cops7a PE=1 SV=2	11277	7525.7	11712	7841.81	8866.3	7232.13	7234.25	7327.07	-0.36921	0.176026	0.306587	2	0.545772	0.923338	50.2074	50.3521	45.3752	44.3476	46.426	49.167	-0.0601261
Q9CZ13	Uqcrc1	"Cytochrome b-c1 complex subunit 1, mitochondrial OS=Mus musculus OX=10090 GN=Uqcrc1 PE=1 SV=2"	460105	417718	419702	361364	366203	555274	303267	272865	-0.329329	0.429022	0.569728	16	0.391536	0.876645	199.838	206.803	156.376	170.296	185.437	165.522	-0.102035
Q9CZ30	Ola1	Obg-like ATPase 1 OS=Mus musculus OX=10090 GN=Ola1 PE=1 SV=1	27689.2	28042.7	25271	25168.1	36739.9	66520.1	38672.3	56293.1	0.818726	0.0041753	0.0400333	6	-0.710372	0.340427	47.7156	52.634	42.2707	39.8938	41.8532	39.6928	-0.226578
Q9CZ42	Naxd	ATP-dependent (S)-NAD(P)H-hydrate dehydratase OS=Mus musculus OX=10090 GN=Naxd PE=1 SV=1	8841.73	9153.1	7195.34	10182.8	10943	15689.4	10767.8	15228.7	0.521033	0.0220878	0.093819	3	-0.746071	0.959346	44.4135	47.7799	42.5913	44.6826	46.2283	48.4861	0.049367
Q9CZ44	Nsfl1c	NSFL1 cofactor p47 OS=Mus musculus OX=10090 GN=Nsfl1c PE=1 SV=1	8746.35	7265.9	12590.9	13967	17567.4	20387.2	8115.32	21005.8	0.850715	0.118366	0.235508	4	-0.740676	0.997368	51.0786	48.9623	47.113	48.6438	49.3427	47.8247	-0.0125562
Q9CZD3	Gars	Glycine--tRNA ligase OS=Mus musculus OX=10090 GN=Gars PE=1 SV=1	37994.1	35898.5	39089	32296.1	45898.5	56154.1	43911.5	50304.6	0.37972	0.0235535	0.096497	9	-0.735423	0.953318	96.377	95.0762	79.9627	84.2941	94.1803	82.1806	-0.0558152
Q9CZE3	Rab32	Ras-related protein Rab-32 OS=Mus musculus OX=10090 GN=Rab32 PE=1 SV=3	6718.86	6359.99	4788.59	5773.26	3389.53	5729.74	4588.27	5595.39	-0.25811	0.187609	0.319377	2	0.611722	0.255956	37.4445	49.2112	38.7782	36.9968	30.2854	34.5959	-0.294121
Q9CZJ2	Hspa12b	Heat shock 70 kDa protein 12B OS=Mus musculus OX=10090 GN=Hspa12b PE=1 SV=1	15472.7	14516.1	13337.4	13393.7	10612.8	16791.5	23487.8	15852.1	0.226599	0.471878	0.60665	6	-0.209832	0.329858	83.7761	65.6405	71.9485	96.3155	105.847	85.9353	0.382279
Q9CZL2	Fam241a	Uncharacterized protein FAM241A OS=Mus musculus OX=10090 GN=Fam241a PE=1 SV=1	1433.71	4496.25	1315.24	1944.73	914.956	1061.84	2338.83	772.763	-0.760492	0.120105	0.238149	2	0.574481	0.331625	22.8177	32.0974	22.8173	20.7581	19.8546	18.0404	-0.389453
Q9CZM2	Rpl15	60S ribosomal protein L15 OS=Mus musculus OX=10090 GN=Rpl15 PE=1 SV=4	42673.9	56141.1	28628.9	36333.7	30921.9	26164.1	36965.8	45158.5	-0.21992	0.415881	0.558266	3	0.453298	0.993699	66.3131	66.9266	61.4036	65.1584	64.2968	67.3566	0.0167737
Q9CZU6	Cs	"Citrate synthase, mitochondrial OS=Mus musculus OX=10090 GN=Cs PE=1 SV=1"	955348	567307	625990	616782	596581	481091	408480	483485	-0.365559	0.0580382	0.154238	13	0.703135	0.506895	447.298	501.389	357.675	355.623	388.962	338.353	-0.259105
Q9CZW5	Tomm70	Mitochondrial import receptor subunit TOM70 OS=Mus musculus OX=10090 GN=Tomm70 PE=1 SV=2	13660.8	17802.3	14618.6	16328.8	12320.1	18498.7	18171	13999.1	0.0458755	0.998082	0.998082	6	0.0385488
Q9CZX8	Rps19	40S ribosomal protein S19 OS=Mus musculus OX=10090 GN=Rps19 PE=1 SV=3	349212	230208	204498	195880	173528	192292	116991	215123	-0.248281	0.0987247	0.212337	11	0.680624	0.828826	162.825	162.494	140.499	142.746	152.736	133.189	-0.118771
Q9CZX9	Emc4	ER membrane protein complex subunit 4 OS=Mus musculus OX=10090 GN=Emc4 PE=1 SV=1	2963.43	7867.11	2249.81	5146.54	3292.07	9655.47	5891.23	11836.3	0.949521	0.164651	0.293259	1	-0.457287	0.993024	32.0962	35.1883	28.3851	32.1883	31.3483	33.3897	0.0238983
Q9CZY3	Ube2v1	Ubiquitin-conjugating enzyme E2 variant 1 OS=Mus musculus OX=10090 GN=Ube2v1 PE=1 SV=1	58804.4	60109.4	55620.1	58139.1	74927.4	139229	64575.6	125066	0.72734	0.0243306	0.0978103	6	-0.651737
Q9D023	Mpc2	Mitochondrial pyruvate carrier 2 OS=Mus musculus OX=10090 GN=Mpc2 PE=1 SV=1	28534.9	35183.7	14714.1	19875.2	8898.2	9649.37	15272.8	9508.24	-1.31397	0.00524261	0.0445365	3	0.900147	0.365659	131.728	148.471	99.4836	96.1381	108.912	90.5654	-0.345636
Q9D024	Ccdc47	Coiled-coil domain-containing protein 47 OS=Mus musculus OX=10090 GN=Ccdc47 PE=1 SV=2	69021.5	39398	59752.1	36194.4	41225.3	87194	35533.3	63196.8	0.0731347	0.743616	0.820553	10	-0.0639013	0.734281	82.439	90.9274	83.3709	78.8943	77.9656	81.6359	-0.105208
Q9D051	Pdhb	"Pyruvate dehydrogenase E1 component subunit beta, mitochondrial OS=Mus musculus OX=10090 GN=Pdhb PE=1 SV=1"	660217	420707	530132	480884	462398	483629	298819	382248	-0.264199	0.130226	0.250959	14	0.602069	0.00391514	211.467	266.131	151.804	120.693	129.774	103.989	-0.797002
Q9D0E1	Hnrnpm	Heterogeneous nuclear ribonucleoprotein M OS=Mus musculus OX=10090 GN=Hnrnpm PE=1 SV=3	196423	189598	200044	175384	249942	501046	230695	438053	0.777897	0.015753	0.0774767	22	-0.656758	0.95941	131.789	117.998	116.524	113.185	127.129	115.058	-0.0434318
Q9D0F3	Lman1	Protein ERGIC-53 OS=Mus musculus OX=10090 GN=Lman1 PE=1 SV=1	27032.4	24465.4	26988.2	29866.2	35739.9	62603.3	36642.4	65068.2	0.826369	0.0082615	0.0545158	7	-0.761565	0.916194	68.8049	73.9588	66.4314	75.682	68.8201	74.827	0.0684134
Q9D0F9	Pgm1	Phosphoglucomutase-1 OS=Mus musculus OX=10090 GN=Pgm1 PE=1 SV=4	671203	568128	545239	500456	449211	465552	502447	410907	-0.283385	0.0813029	0.190163	26	0.914743	0.587482	215.052	238.148	179.44	183.835	195.769	169.88	-0.195988
Q9D0G0	Mrps30	"28S ribosomal protein S30, mitochondrial OS=Mus musculus OX=10090 GN=Mrps30 PE=1 SV=1"	1421.52	2121	1165.69	695.035	730.337	1334.26	1042.24	962.499	-0.362035	0.363077	0.505797	1	0.657934	0.769416	32.2177	28.6539	29.2456	25.882	31.0764	24.9272	-0.143107
Q9D0I9	Rars	"Arginine--tRNA ligase, cytoplasmic OS=Mus musculus OX=10090 GN=Rars PE=1 SV=2"	11933.4	13769.3	8594.47	11213.1	8892.07	10956.6	14214	12710.5	0.0288114	0.864176	0.908069	4	0.0830125	1	48.4855	47.531	43.5024	47.9343	45.8081	46.7352	0.0112189
Q9D0K2	Oxct1	"Succinyl-CoA:3-ketoacid coenzyme A transferase 1, mitochondrial OS=Mus musculus OX=10090 GN=Oxct1 PE=1 SV=1"	186492	129431	161861	146922	167164	232938	213630	197874	0.414944	0.0696592	0.173614	12	-0.588358	1	270.743	287.145	233.65	260.949	259.986	265.711	-0.00366456
Q9D0M3	Cyc1	"Cytochrome c1, heme protein, mitochondrial OS=Mus musculus OX=10090 GN=Cyc1 PE=1 SV=1"	140319	111961	132558	129440	122484	93065.9	73472.8	86838.5	-0.543085	0.0387161	0.121329	6	0.667773	0.572585	154.357	174.443	125.686	122.546	142.824	119.961	-0.229575
Q9D0R2	Tars	"Threonine--tRNA ligase, cytoplasmic OS=Mus musculus OX=10090 GN=Tars PE=1 SV=2"	10827.6	12372	7758.28	11977.5	6397.4	5162.91	9532.12	6859.45	-0.781665	0.0284636	0.105853	4	0.722738	0.90055	49.154	49.2942	40.4148	41.8842	42.9408	44.9065	-0.092643
Q9D0S9	Hint2	"Histidine triad nucleotide-binding protein 2, mitochondrial OS=Mus musculus OX=10090 GN=Hint2 PE=1 SV=1"	32916.2	44322.2	40424.3	35221.9	43176.3	58675.4	29142.1	45435.9	0.231188	0.479443	0.614098	4	-0.298598	0.656548	47.9587	43.3614	40.5667	38.6916	43.6823	36.8525	-0.145888
Q9D0T1	Snu13	NHP2-like protein 1 OS=Mus musculus OX=10090 GN=Snu13 PE=1 SV=4	1285.05	1218.53	1431.38	856.961	1046.11	2747.36	1452.76	2632.25	0.644068	0.0992754	0.212409	1	-0.518038	0.844587	7.54266	7.10089	7.56508	6.64776	6.0128	7.399	-0.151398
Q9D172	Gatd3a	"Glutamine amidotransferase-like class 1 domain-containing protein 3A, mitochondrial OS=Mus musculus OX=10090 GN=Gatd3a PE=1 SV=1"	138027	156446	137078	105541	123987	173329	120621	139579	-0.0643358	0.791199	0.854577	7	0.109695	0.994363	87.9696	90.2429	70.2951	80.6285	86.419	78.4844	-0.00973271
Q9D1A2	Cndp2	Cytosolic non-specific dipeptidase OS=Mus musculus OX=10090 GN=Cndp2 PE=1 SV=1	132009	114611	136099	146344	164260	176261	145594	167553	0.307655	0.0800319	0.188701	11	-0.885675	0.262858	101.34	108.788	115.731	89.4377	76.2848	86.8107	-0.369047
Q9D1D4	Tmed10	Transmembrane emp24 domain-containing protein 10 OS=Mus musculus OX=10090 GN=Tmed10 PE=1 SV=1	21279.3	20130.7	16090.5	16784.2	22375.9	33939.3	22874.7	37986.9	0.600103	0.0224349	0.0948283	2	-0.643266	0.866553	103.994	116.194	113.42	122.881	113.707	117.859	0.0883141
Q9D1E6	Tbcb	Tubulin-folding cofactor B OS=Mus musculus OX=10090 GN=Tbcb PE=1 SV=2	5937.01	3900.23	4076.4	5314.52	4656.25	4338.38	2033.28	6791.24	-0.0504553	0.565641	0.684721	3	0.00647118	0.989618	42.185	43.3407	35.4713	42.3178	39.2579	43.2335	0.049097
Q9D1G1	Rab1b	Ras-related protein Rab-1B OS=Mus musculus OX=10090 GN=Rab1b PE=1 SV=1	93697.8	77854.6	111531	118120	146334	150189	114942	164906	0.536255	0.026583	0.102374	7	-0.91076	0.936969	199.392	218.669	166.145	182.653	185.067	183.731	-0.0740185
Q9D1J3	Sarnp	SAP domain-containing ribonucleoprotein OS=Mus musculus OX=10090 GN=Sarnp PE=1 SV=3	48783.3	31938.1	41403.5	30118.9	26245.9	56018.9	30706.4	62778.2	0.189712	0.683508	0.775495	7	-0.199954	0.899173	18.4216	14.8799	15.225	16.8167	13.6505	14.4219	-0.111362
Q9D1L0	Chchd2	Coiled-coil-helix-coiled-coil-helix domain-containing protein 2 OS=Mus musculus OX=10090 GN=Chchd2 PE=2 SV=1	11078.6	8405.08	8428.22	11045.7	11290.4	9099.33	6094.78	7033.62	-0.270307	0.321853	0.463265	1	0.316187	0.680743	184.016	173.447	167.258	149.623	168.728	144.551	-0.182931
Q9D1M0	Sec13	Protein SEC13 homolog OS=Mus musculus OX=10090 GN=Sec13 PE=1 SV=3	3765.6	5818.59	5290.76	4306.58	5381.01	3180.92	5589.11	6259.65	0.20024	0.802683	0.86347	2	-0.195472	0.968827	79.3394	86.7164	69.7383	74.539	72.8738	79.71	-0.0493795
Q9D1P4	Chordc1	Cysteine and histidine-rich domain-containing protein 1 OS=Mus musculus OX=10090 GN=Chordc1 PE=1 SV=1	3428.81	1943.58	3070.43	2910.22	1592.32	3598.7	1744.55	3240.22	-0.330311	0.512816	0.64446	2	0.103281	0.884864	48.8704	46.8464	44.0254	43.5593	43.9295	39.9652	-0.132773
Q9D1Q4	Dpm3	Dolichol-phosphate mannosyltransferase subunit 3 OS=Mus musculus OX=10090 GN=Dpm3 PE=1 SV=1	5442.4	6400.25	3593.1	5287.88	5586.68	3994.19	6282.12	4958.85	-0.0274678	0.940473	0.962125	1	0.153129	1	16.6388	16.5809	14.9719	15.4766	16.8885	15.8032	4.95e-06
Q9D1Q6	Erp44	Endoplasmic reticulum resident protein 44 OS=Mus musculus OX=10090 GN=Erp44 PE=1 SV=1	6557.63	7093.06	6778.97	4872.16	6031.91	12139.9	8018.32	11839.7	0.547311	0.0697259	0.173614	1	-0.537856	0.967784	45.1023	43.7348	44.1435	45.7271	41.6802	48.8168	0.0318693
Q9D1R9	Rpl34	60S ribosomal protein L34 OS=Mus musculus OX=10090 GN=Rpl34 PE=1 SV=2	40744.1	42819.7	28065.8	24567.2	26261.3	20809.8	27922.7	18058.3	-0.532603	0.0595834	0.156452	3	0.886104	1	123.017	122.417	123.29	120.634	124.657	123.19	-0.00107659
Q9D2G2	Dlst	"Dihydrolipoyllysine-residue succinyltransferase component of 2-oxoglutarate dehydrogenase complex, mitochondrial OS=Mus musculus OX=10090 GN=Dlst PE=1 SV=1"	215068	170286	185819	204562	181001	172943	146873	131247	-0.290781	0.115599	0.232946	10	0.65054	0.726473	184.583	193.444	168.659	163.399	170.78	157.896	-0.150262
Q9D2M8	Ube2v2	Ubiquitin-conjugating enzyme E2 variant 2 OS=Mus musculus OX=10090 GN=Ube2v2 PE=1 SV=4	811.912	391.531	576.731	1168.01	2500.77	8799.73	1682.87	11538.1	2.77723	0.00240967	0.0326247	2	-0.694502	0.532015	5.13188	4.83979	4.69684	3.29754	4.43088	4.3447	-0.292629
Q9D2R0	Aacs	Acetoacetyl-CoA synthetase OS=Mus musculus OX=10090 GN=Aacs PE=1 SV=1	180297	132123	121307	126723	66563.4	53783.8	46837.9	42799	-1.36628	9.39e-05	0.0156936	13	0.939409	0.578668	391.566	357.758	241.259	178.278	249.258	136.283	-0.826818
Q9D2V7	Coro7	Coronin-7 OS=Mus musculus OX=10090 GN=Coro7 PE=1 SV=2	4398.98	823.718	568.055	617.773	580.578	860.099	1657.22	866.58	0.275303	0.757939	0.831467	2	0.470447	0.965563	31.4074	27.4715	29.7686	31.9124	33.301	27.2227	0.0572206
Q9D358	Acp1	Low molecular weight phosphotyrosine protein phosphatase OS=Mus musculus OX=10090 GN=Acp1 PE=1 SV=3	17882.3	18202.4	21707.4	19967.6	24967.7	22333.8	16302.4	23000.4	0.249546	0.458309	0.595175	4	-0.537216	0.916194	28.0242	29.1518	26.1411	23.1427	26.0834	25.0244	-0.166517
Q9D379	Ephx1	Epoxide hydrolase 1 OS=Mus musculus OX=10090 GN=Ephx1 PE=1 SV=2	23432.8	18148.2	17063.1	14856.9	10297.6	9932.82	17274.2	12071.9	-0.658371	0.0344339	0.115172	4	0.822077	0.70557	50.5518	41.453	57.793	60.0937	56.6096	60.4309	0.254472
Q9D3B1	Hacd2	Very-long-chain (3R)-3-hydroxyacyl-CoA dehydratase 2 OS=Mus musculus OX=10090 GN=Hacd2 PE=1 SV=1	8334.02	13245.3	16431.3	13482	25355.4	10764.6	12584.3	27218.2	0.418699	0.21382	0.350568	5	-0.613077	0.792294	237.6	233.459	223.341	195.916	239.05	184.393	-0.173544
Q9D3D9	Atp5f1d	"ATP synthase subunit delta, mitochondrial OS=Mus musculus OX=10090 GN=Atp5f1d PE=1 SV=1"	37888.9	28061	39170.4	43232.2	50810.5	44967.5	25471.1	32624.5	-0.00835161	0.942252	0.962809	2	-0.208535
Q9D404	Oxsm	"3-oxoacyl-[acyl-carrier-protein] synthase, mitochondrial OS=Mus musculus OX=10090 GN=Oxsm PE=1 SV=1"	3380.25	5181.8	4171.55	6215.02	2333.94	1393.09	2720.04	3464.81	-0.883819	0.0129871	0.0688277	2	0.538407	0.845411	26.8492	27.513	24.0321	24.3645	24.2544	24.791	-0.0923716
Q9D517	Agpat3	1-acyl-sn-glycerol-3-phosphate acyltransferase gamma OS=Mus musculus OX=10090 GN=Agpat3 PE=1 SV=2	8223.11	11438.9	9875.33	10387.9	13030.1	10339.1	11483.8	10596.5	0.123196	0.289627	0.431127	2	-0.519889	1	210.048	219.665	177.483	191.954	219.449	195.501	0.00270658
Q9D5J6	Shpk	Sedoheptulokinase OS=Mus musculus OX=10090 GN=Shpk PE=1 SV=1	2690.92	2483.11	3324.96	3130.67	1964.26	4163.89	3139.86	921.632	-0.224942	0.387075	0.528717	2	0.218167	0.913572	18.9483	19.6718	17.2665	16.9743	17.5806	17.8459	-0.0910793
Q9D5V6	Syap1	Synapse-associated protein 1 OS=Mus musculus OX=10090 GN=Syap1 PE=1 SV=1	6557.78	6484.56	9614.72	7414.1	7407.74	16053.1	6566.64	11279.8	0.390611	0.234718	0.373523	2	-0.474426	0.899625	166.269	188.445	150.15	174.277	186.55	173.673	0.0877493
Q9D6J6	Ndufv2	"NADH dehydrogenase [ubiquinone] flavoprotein 2, mitochondrial OS=Mus musculus OX=10090 GN=Ndufv2 PE=1 SV=2"	32468.7	43100.3	18877.1	24703.4	26527.3	19740.9	20655.9	14555.2	-0.488009	0.115056	0.232664	3	0.75559	0.0369277	112.705	119.928	107.228	94.0885	94.5511	85.6435	-0.309243
Q9D6M3	Slc25a22	Mitochondrial glutamate carrier 1 OS=Mus musculus OX=10090 GN=Slc25a22 PE=1 SV=1	7911.8	10912.6	10302.7	9989.89	7389.8	6182.96	10796.4	11601.1	-0.183701	0.527267	0.655377	4	0.0714138	0.90926	52.8613	50.767	48.7327	54.8121	60.5891	46.9298	0.0843545
Q9D6R2	Idh3a	"Isocitrate dehydrogenase [NAD] subunit alpha, mitochondrial OS=Mus musculus OX=10090 GN=Idh3a PE=1 SV=1"	219795	252301	192294	186667	162894	169868	156148	171299	-0.305563	0.0531486	0.146666	11	0.903637	0.905037	193.396	226.987	147.923	172.07	189.911	159.063	-0.107031
Q9D6S7	Mrrf	"Ribosome-recycling factor, mitochondrial OS=Mus musculus OX=10090 GN=Mrrf PE=1 SV=1"	4970.63	2326.96	3395.31	3325.57	1351.68	1164.29	799.443	1168.01	-1.52682	0.000222666	0.0156936	2	0.819182	0.882868	29.1789	30.0438	26.7654	26.8082	27.3688	27.2033	-0.0777915
Q9D6Y7	Msra	Mitochondrial peptide methionine sulfoxide reductase OS=Mus musculus OX=10090 GN=Msra PE=1 SV=1	42195.4	30813	44094.6	45702.1	56428	83757.8	36473	78063.7	0.621688	0.0706925	0.175265	6	-0.686108	0.132779	46.885	46.3071	42.4395	35.9721	39.0602	37.9225	-0.263379
Q9D6Y9	Gbe1	"1,4-alpha-glucan-branching enzyme OS=Mus musculus OX=10090 GN=Gbe1 PE=1 SV=1"	174963	113170	114954	93124.3	67001.2	83851.7	75964.2	72862.6	-0.616452	0.0113338	0.0635645	10	0.870402	0.027994	87.4632	124.305	61.0661	53.7479	56.3872	43.5642	-0.776712
Q9D7B1	Dus2	tRNA-dihydrouridine(20) synthase [NAD(P)+]-like OS=Mus musculus OX=10090 GN=Dus2 PE=1 SV=1	8591.71	6450.74	9370.69	7183.95	9320.24	15130.4	10239.1	16287.3	0.663833	0.0216526	0.0921965	1	-0.718988	0.776942	17.7328	16.4979	15.6805	13.9197	16.4189	14.7916	-0.146805
Q9D7B6	Acad8	"Isobutyryl-CoA dehydrogenase, mitochondrial OS=Mus musculus OX=10090 GN=Acad8 PE=1 SV=2"	15019.7	11438.8	14246.6	12678.7	12071.5	13611.8	12354.4	10334.9	-0.138194	0.420756	0.562631	3	0.495074	0.977502	44.9604	41.7019	41.2584	42.9287	41.8038	40.3348	-0.0319516
Q9D7G0	Prps1	Ribose-phosphate pyrophosphokinase 1 OS=Mus musculus OX=10090 GN=Prps1 PE=1 SV=4	32297.7	27862	28383	24995.2	35718.1	23418.3	25456.2	22455.2	-0.203834	0.605886	0.717213	6	0.327011	0.270938	46.0747	53.7956	50.4536	65.2372	62.4924	59.0497	0.314961
Q9D7N9	Apmap	Adipocyte plasma membrane-associated protein OS=Mus musculus OX=10090 GN=Apmap PE=1 SV=1	318979	260871	352717	377492	501873	463831	322961	477115	0.487982	0.0699015	0.173801	16	-0.807858	0.884684	227.937	251.507	188.264	210.814	209.389	202.952	-0.0895648
Q9D7S9	Chmp5	Charged multivesicular body protein 5 OS=Mus musculus OX=10090 GN=Chmp5 PE=1 SV=1	3374.02	2702.89	3249.6	3912.95	5219	3695.86	3445.22	5168.07	0.400402	0.0948251	0.206707	2	-0.760316	1	81.0006	88.3344	78.1912	82.9146	79.5228	85.4684	0.00349011
Q9D7X3	Dusp3	Dual specificity protein phosphatase 3 OS=Mus musculus OX=10090 GN=Dusp3 PE=1 SV=1	19484.5	25261.1	28377	28348.9	45602.6	61281.5	45004.8	63785.6	0.982178	0.000570372	0.020738	4	-0.905615	0.00158177	149.921	148.845	130.916	194.359	190.9	194.178	0.43409
Q9D819	Ppa1	Inorganic pyrophosphatase OS=Mus musculus OX=10090 GN=Ppa1 PE=1 SV=1	165234	75221.2	147793	146052	153072	84845.5	66756.2	82993.6	-0.808042	0.188417	0.320438	10	0.344189	0.701947	121.64	127.395	117.402	91.8813	130.045	84.2817	-0.284409
Q9D823	Rpl37	60S ribosomal protein L37 OS=Mus musculus OX=10090 GN=Rpl37 PE=3 SV=3	1452.87	5364.47	5616.08	4442.97	7606.88	5960.12	4910.26	10304.2	0.463844	0.0808587	0.190133	2	-0.737308	0.91616	122.713	112.501	116.103	108.495	110.173	116.05	-0.0694979
Q9D855	Uqcrb	Cytochrome b-c1 complex subunit 7 OS=Mus musculus OX=10090 GN=Uqcrb PE=1 SV=3	13061.1	11450	18054.7	16037.9	13751.4	13154.8	7219.92	8137.18	-0.484286	0.093405	0.204641	2	0.400997	0.0377027	92.4671	99.5569	94.1689	79.1111	81.5002	72.7648	-0.295262
Q9D880	Timm50	Mitochondrial import inner membrane translocase subunit TIM50 OS=Mus musculus OX=10090 GN=Timm50 PE=1 SV=1	20675.9	26316.3	24336.3	19978.2	22224.7	23616.5	23370.3	19004.6	0.02289	0.790482	0.854577	4	0.357547	0.850895	56.3256	58.6705	45.4595	48.3876	54.3603	44.5369	-0.119605
Q9D892	Itpa	Inosine triphosphate pyrophosphatase OS=Mus musculus OX=10090 GN=Itpa PE=1 SV=2	3841.64	3584.97	3682.57	3100.83	7710.85	13312.9	6442.75	14701.8	1.47948	0.00061449	0.0208935	2	-0.774415	0.48221	27.0518	28.6539	24.9095	22.3938	23.2162	21.5421	-0.261918
Q9D8B3	Chmp4b	Charged multivesicular body protein 4b OS=Mus musculus OX=10090 GN=Chmp4b PE=1 SV=2	35805.2	21261.9	30509.8	29812.7	28846.2	50301	22906	35198.7	0.0793503	0.509472	0.641187	4	-0.279323	1	103.569	102.316	93.4434	100.848	91.6344	108.619	0.00654466
Q9D8E6	Rpl4	60S ribosomal protein L4 OS=Mus musculus OX=10090 GN=Rpl4 PE=1 SV=3	78470.9	117471	57989.1	65913	66995.2	58075.6	99746.3	93908.9	0.141299	0.965922	0.980634	16	0.191565	1	536.152	535.015	517.672	522.976	509.485	543.827	-0.0117771
Q9D8N0	Eef1g	Elongation factor 1-gamma OS=Mus musculus OX=10090 GN=Eef1g PE=1 SV=3	251637	268191	275165	255446	306463	402818	346288	451072	0.51291	0.0162771	0.0785744	15	-0.798863	0.972198	164.183	167.348	141.866	152.698	147.595	160.756	-0.0351644
Q9D8T7	Slirp	"SRA stem-loop-interacting RNA-binding protein, mitochondrial OS=Mus musculus OX=10090 GN=Slirp PE=1 SV=2"	7.42283	7.42283	370.1	224.384	7.42283	7.42283	36.872	7.42283	-2.45893	0.169236	0.298966	1	0.225531	0.901467	24.4181	25.9779	26.1917	24.1674	24.6251	22.7288	-0.0988774
Q9D8U8	Snx5	Sorting nexin-5 OS=Mus musculus OX=10090 GN=Snx5 PE=1 SV=1	35595.6	34903.4	40259	44470.4	54255.8	89811.9	56723.6	95838	0.914922	0.00447671	0.0406186	6	-0.812843	0.741512	105.959	119.533	107.245	99.0548	92.4254	111.187	-0.138729
Q9D8V0	Hm13	Minor histocompatibility antigen H13 OS=Mus musculus OX=10090 GN=Hm13 PE=1 SV=1	4144.04	1708.26	1942.03	2704.72	1576.99	859.851	2536.65	2041.5	-0.353124	0.161577	0.289569	1	0.493072
Q9D8W5	Psmd12	26S proteasome non-ATPase regulatory subunit 12 OS=Mus musculus OX=10090 GN=Psmd12 PE=1 SV=4	5300.41	4110.1	5985.29	5179.25	9299.16	12127.6	12596.4	17136.4	1.23815	0.000304137	0.0156936	2	-0.869181	0.908985	70.5472	75.6183	64.5755	68.1145	69.4627	63.4269	-0.0663386
Q9D8X2	Ccdc124	Coiled-coil domain-containing protein 124 OS=Mus musculus OX=10090 GN=Ccdc124 PE=1 SV=1	6566.36	10342.9	6765.75	10898.3	3744.93	15002.6	8938.23	20688.9	0.469155	0.609313	0.720286	3	-0.423537	0.922054	30.7996	31.5996	25.9724	29.9022	32.0898	31.6583	0.0883851
Q9D967	Mdp1	Magnesium-dependent phosphatase 1 OS=Mus musculus OX=10090 GN=Mdp1 PE=1 SV=1	4026.66	3442.52	4267.83	6207.85	7892.33	11172.3	8154.22	12672.1	1.20316	0.00123945	0.0257717	3	-0.904408	0.902575	39.1665	38.5488	35.4376	37.2924	35.1548	34.9071	-0.0751531
Q9D9V3	Echdc1	Ethylmalonyl-CoA decarboxylase OS=Mus musculus OX=10090 GN=Echdc1 PE=1 SV=2	80366.7	68439.5	64014	59002.2	42309.9	31993.1	47494.9	32146.7	-0.843776	0.00238537	0.0326247	7	0.949485	0.363669	128.973	172.327	105.878	102.228	122.259	88.7756	-0.361552
Q9DAR7	Dcps	m7GpppX diphosphatase OS=Mus musculus OX=10090 GN=Dcps PE=1 SV=1	442.232	85.9775	213.866	166.514	1259.91	4652.9	583.5	6106.62	3.68148	0.00195544	0.0302833	1	-0.670839	0.990045	13.1138	14.0086	12.6098	13.4073	12.1675	13.4103	-0.027518
Q9DAS9	Gng12	Guanine nucleotide-binding protein G(I)/G(S)/G(O) subunit gamma-12 OS=Mus musculus OX=10090 GN=Gng12 PE=1 SV=3	83650.7	78349.3	62637.6	59557.2	56175.8	98584.3	67163.2	74691.7	0.0158349	0.838183	0.890056	5	0.122553	0.476995	87.7063	89.3509	89.3942	77.3966	70.6245	85.9547	-0.192109
Q9DAW9	Cnn3	Calponin-3 OS=Mus musculus OX=10090 GN=Cnn3 PE=1 SV=1	12490.2	12284.8	13426.9	12406.2	14329.3	12452.1	17097.5	15838.5	0.275275	0.18332	0.314237	4	-0.655366	0.655975	69.0278	63.0267	75.3736	82.1066	74.0355	80.6632	0.193476
Q9DB05	Napa	Alpha-soluble NSF attachment protein OS=Mus musculus OX=10090 GN=Napa PE=1 SV=1	34795.2	42247.2	34903.9	33008.7	41500.7	43530.8	41303.6	43901.1	0.286448	0.147976	0.270795	6	-0.561144	0.927188	112.766	119.305	108.325	107.765	115.635	104.747	-0.0529882
Q9DB20	Atp5po	"ATP synthase subunit O, mitochondrial OS=Mus musculus OX=10090 GN=Atp5po PE=1 SV=1"	413078	309398	281541	265464	251658	329593	205514	283941	-0.142875	0.284872	0.426035	12	0.595605
Q9DB29	Iah1	Isoamyl acetate-hydrolyzing esterase 1 homolog OS=Mus musculus OX=10090 GN=Iah1 PE=1 SV=1	13673.9	10056.2	10762.6	9321.14	7769.39	10111.2	7979.78	11138.2	-0.211874	0.247296	0.387141	3	0.555376	0.767929	86.4502	93.4997	90.6933	83.0919	81.3766	83.9121	-0.123209
Q9DB34	Chmp2a	Charged multivesicular body protein 2a OS=Mus musculus OX=10090 GN=Chmp2a PE=1 SV=1	9035.82	4814.39	7591.91	8991.14	11318.6	18344.6	14012.7	18117.1	0.947489	0.00366895	0.037623	3	-0.838207	1	101.178	102.98	95.9405	98.1876	101.398	99.0474	-0.00654688
Q9DB60	Prxl2b	Prostamide/prostaglandin F synthase OS=Mus musculus OX=10090 GN=Prxl2b PE=1 SV=1	126.032	384.053	526.752	125.705	2041.62	39.474	92.1232	2338.39	0.979092	0.663073	0.763019	2	-0.544552	0.992257	71.398	76.0747	51.2466	70.302	63.7036	73.5041	0.0806686
Q9DB73	Cyb5r1	NADH-cytochrome b5 reductase 1 OS=Mus musculus OX=10090 GN=Cyb5r1 PE=1 SV=1	3990.17	5786.04	2381.49	3387.54	2034.49	664.541	2601.7	960.357	-1.39519	0.0129505	0.0688277	2	0.844608	0.652255	34.7703	33.6532	30.9496	41.2536	37.0828	34.6348	0.182988
Q9DB77	Uqcrc2	"Cytochrome b-c1 complex subunit 2, mitochondrial OS=Mus musculus OX=10090 GN=Uqcrc2 PE=1 SV=1"	494875	410924	431446	362383	324074	386698	217090	300590	-0.431965	0.0475947	0.138392	13	0.7861	0.15732	207.415	234.663	184.198	170.868	175.204	161.709	-0.296348
Q9DBB8	Dhdh	"Trans-1,2-dihydrobenzene-1,2-diol dehydrogenase OS=Mus musculus OX=10090 GN=Dhdh PE=1 SV=1"	72554	99180.6	88202.7	87979.5	95534.5	119096	103804	117059	0.323482	0.0830504	0.19112	12	-0.728482	0.796567	107.236	107.958	90.8789	89.2997	101.917	82.7059	-0.161031
Q9DBD0	Ica	Inhibitor of carbonic anhydrase OS=Mus musculus OX=10090 GN=Ica PE=1 SV=1	704.742	804.543	773.808	1502.65	3858.63	2263.27	1840.03	2351.78	1.54794	0.00128346	0.0261674	2	-0.821645
Q9DBE0	Csad	Cysteine sulfinic acid decarboxylase OS=Mus musculus OX=10090 GN=Csad PE=1 SV=1	165324	101282	148547	139725	195756	154634	127355	185191	0.232183	0.266131	0.407424	15	-0.527534	1	188.615	172.057	174.159	167.675	199.452	170.152	0.00326769
Q9DBE8	Alg2	"Alpha-1,3/1,6-mannosyltransferase ALG2 OS=Mus musculus OX=10090 GN=Alg2 PE=1 SV=2"	4389.13	4084.82	4676.15	3707.89	3825.29	2733.45	4666.6	3608.61	-0.188598	0.328069	0.470254	2	0.446929	0.970276	30.9617	32.5123	30.9496	29.7446	30.7303	28.5067	-0.0859331
Q9DBF1	Aldh7a1	Alpha-aminoadipic semialdehyde dehydrogenase OS=Mus musculus OX=10090 GN=Aldh7a1 PE=1 SV=4	48051.9	28959.7	64814.1	57275.3	47471.9	30353.3	27618.3	31906.5	-0.753403	0.116359	0.233933	11	0.314746	0.714107	79.1976	73.6891	66.6845	66.0058	63.2092	68.66	-0.147354
Q9DBG3	Ap2b1	AP-2 complex subunit beta OS=Mus musculus OX=10090 GN=Ap2b1 PE=1 SV=1	65527.6	55235	55217.8	42746.1	47529.7	42122.7	61038	39890.1	-0.303646	0.350588	0.493558	10	0.631223	0.564524	110.214	114.472	104.14	123.787	116.97	121.439	0.140136
Q9DBG5	Plin3	Perilipin-3 OS=Mus musculus OX=10090 GN=Plin3 PE=1 SV=1	14341.4	16860.7	21053.2	20557	29118.1	39387.9	25734.1	41206.5	0.863186	0.00338277	0.0361673	6	-0.878289	0.982238	57.0549	57.8615	51.3141	56.4872	49.1696	56.6374	-0.0356206
Q9DBG6	Rpn2	Dolichyl-diphosphooligosaccharide--protein glycosyltransferase subunit 2 OS=Mus musculus OX=10090 GN=Rpn2 PE=1 SV=1	28736.8	20765.8	18922.8	26361.5	18871.3	2461.85	10454.8	4167.05	-1.82569	0.0131452	0.0692422	4	0.757804	0.826119	212.5	219.706	186.357	221.476	216.433	226.9	0.107339
Q9DBH5	Lman2	Vesicular integral-membrane protein VIP36 OS=Mus musculus OX=10090 GN=Lman2 PE=1 SV=2	16205	9374	8062.48	7414.28	2366.92	1912.24	1357.61	1496.23	-2.36164	1.79e-05	0.0141398	3	0.929392	0.903769	217.909	248.623	191.014	222.067	233.587	245.245	0.0992719
Q9DBJ1	Pgam1	Phosphoglycerate mutase 1 OS=Mus musculus OX=10090 GN=Pgam1 PE=1 SV=3	138799	212432	122639	157239	328604	296067	167768	284028	0.973002	0.0201412	0.0889176	12	-0.665646	0.633357	20.2854	24.6503	18.5994	17.6641	19.1873	19.3244	-0.168637
Q9DBL1	Acadsb	"Short/branched chain specific acyl-CoA dehydrogenase, mitochondrial OS=Mus musculus OX=10090 GN=Acadsb PE=1 SV=1"	97372.2	84775.8	98642.7	77793.5	36797.9	66918.3	53280.4	50780.7	-0.804639	0.00427059	0.0402225	9	0.872666	0.634819	234.379	234.02	212.003	200.744	214.555	191.746	-0.164552
Q9DBL7	Coasy	Bifunctional coenzyme A synthase OS=Mus musculus OX=10090 GN=Coasy PE=1 SV=2	14589.7	11639	14244.3	10635.5	9533.89	6986.15	7512.39	6665.68	-0.829718	0.00392409	0.038923	3	0.871528	0.403469	55.3532	60.0603	42.4057	40.9974	48.354	39.2065	-0.286359
Q9DBL9	Abhd5	1-acylglycerol-3-phosphate O-acyltransferase ABHD5 OS=Mus musculus OX=10090 GN=Abhd5 PE=1 SV=1	87704.8	124251	97867.3	127779	158449	86205.1	122390	91813.2	-0.0569468	0.863418	0.908069	7	-0.156164	0.224382	155.492	206.617	155.111	129.522	141.045	116.809	-0.407863
Q9DBM2	Ehhadh	Peroxisomal bifunctional enzyme OS=Mus musculus OX=10090 GN=Ehhadh PE=1 SV=4	59144.6	40148.4	52500.4	29092.6	54571	26618.5	44410.8	32871.1	-0.26497	0.536748	0.662525	12	0.39867	0.189958	62.7678	76.5726	60.0875	49.0576	48.7	37.5529	-0.562199
Q9DBP5	Cmpk1	UMP-CMP kinase OS=Mus musculus OX=10090 GN=Cmpk1 PE=1 SV=1	61609.4	75014.8	70919.1	70980.9	104431	137838	84871.1	140469	0.757889	0.00678651	0.0494161	7	-0.798217	0.262858	80.1903	91.6742	75.8291	67.07	69.5616	72.8038	-0.238241
Q9DBR7	Ppp1r12a	Protein phosphatase 1 regulatory subunit 12A OS=Mus musculus OX=10090 GN=Ppp1r12a PE=1 SV=2	1098.43	3589.14	464.817	1684.33	2651.36	1401.37	4923.77	6729.72	1.40944	0.0823933	0.190729	4	-0.51494	0.443208	87.8481	84.5383	107.228	90.6595	105.971	185.501	0.387395
Q9DBS1	Tmem43	Transmembrane protein 43 OS=Mus musculus OX=10090 GN=Tmem43 PE=1 SV=1	112310	182938	115248	147008	81930.1	88796.6	147203	110277	-0.395471	0.152903	0.276887	10	0.509933	0.64882	233.346	221.843	202.335	279.986	243.425	285.787	0.29834
Q9DBZ5	Eif3k	Eukaryotic translation initiation factor 3 subunit K OS=Mus musculus OX=10090 GN=Eif3k PE=1 SV=1	4856.29	6726	5056.6	6303.11	3841.68	1754.67	3956.01	1967.03	-1.03824	0.0071508	0.0510673	1	0.772549	0.947291	87.3821	83.8122	80.2327	86.5998	86.4684	85.6629	0.0421732
Q9DC16	Ergic1	Endoplasmic reticulum-Golgi intermediate compartment protein 1 OS=Mus musculus OX=10090 GN=Ergic1 PE=1 SV=1	8504.36	7660.11	6460.11	7504.71	5205.5	3552.19	5786.79	5635.38	-0.485305	0.0171077	0.0794844	2	0.815579	0.850895	113.111	126.42	92.0768	96.0199	90.1019	115.875	-0.131089
Q9DC51	Gnai3	Guanine nucleotide-binding protein G(k) subunit alpha OS=Mus musculus OX=10090 GN=Gnai3 PE=1 SV=3	20633.1	17041.1	18657.2	17236.4	12027.9	9088.17	19340.2	7039.65	-0.778371	0.037538	0.119369	2	0.726083	0.871633	99.983	105.593	96.4973	95.0148	87.1358	101.362	-0.0932504
Q9DC61	Pmpca	Mitochondrial-processing peptidase subunit alpha OS=Mus musculus OX=10090 GN=Pmpca PE=1 SV=1	5492.55	5793.66	6968.03	5536.11	7892.7	13704.2	7078.93	9391.86	0.604291	0.0224283	0.0948283	1	-0.632456	0.982238	73.0592	78.0869	70.5988	74.3814	71.4402	72.1618	-0.0236264
Q9DC69	Ndufa9	"NADH dehydrogenase [ubiquinone] 1 alpha subcomplex subunit 9, mitochondrial OS=Mus musculus OX=10090 GN=Ndufa9 PE=1 SV=2"	7982.51	5432.25	4581.03	5250.35	5798.4	12774	4900.68	9022.61	0.437618	0.239676	0.379298	4	-0.318898	0.585059	118.641	123.558	100.479	102.779	107.33	95.4873	-0.161234
Q9DC70	Ndufs7	"NADH dehydrogenase [ubiquinone] iron-sulfur protein 7, mitochondrial OS=Mus musculus OX=10090 GN=Ndufs7 PE=1 SV=1"	30132.4	24321.7	22993.7	23704.4	27643.8	21031.8	18993.7	25902.6	-0.0408673	0.533342	0.660201	3	0.3387	0.909733	71.5601	72.32	57.7255	63.2862	67.4112	59.0691	-0.0818249
Q9DCB1	Hmgn3	High mobility group nucleosome-binding domain-containing protein 3 OS=Mus musculus OX=10090 GN=Hmgn3 PE=1 SV=1	376.828	1544.67	2401.69	1751.83	2960.89	14948	7872.45	16341.9	2.72126	0.00340177	0.0361673	1	-0.749015	0.941751	33.1091	26.7869	31.7089	31.4197	28.0114	27.5535	-0.0712425
Q9DCC4	Pycr3	Pyrroline-5-carboxylate reductase 3 OS=Mus musculus OX=10090 GN=Pycr3 PE=1 SV=2	4919.3	5042.02	3904.4	3182.1	4926.42	9073.66	6978.39	7790.44	0.750523	0.0143296	0.0726118	3	-0.590521
Q9DCD0	Pgd	"6-phosphogluconate dehydrogenase, decarboxylating OS=Mus musculus OX=10090 GN=Pgd PE=1 SV=3"	1.06714e+06	842426	715517	587297	574818	654685	799692	663799	-0.235994	0.321512	0.463159	22	0.697822	0.674223	323.821	428.868	268.946	293.151	279.636	249.116	-0.290344
Q9DCF9	Ssr3	Translocon-associated protein subunit gamma OS=Mus musculus OX=10090 GN=Ssr3 PE=1 SV=1	5728.1	10189.2	2610.03	5663.05	3116.74	4966.85	7856.75	2659.76	-0.533632	0.469005	0.603852	2	0.479164	0.55162	248.763	256.506	259.801	234.463	214.975	225.48	-0.181549
Q9DCH4	Eif3f	Eukaryotic translation initiation factor 3 subunit F OS=Mus musculus OX=10090 GN=Eif3f PE=1 SV=2	1612.51	3445.65	2416.57	4359.23	3151.23	1491.52	3415.82	2248.66	-0.116378	0.65047	0.753519	2	0.010082	1	118.54	113.372	116.221	113.835	117.093	117.451	0.0011186
Q9DCJ5	Ndufa8	NADH dehydrogenase [ubiquinone] 1 alpha subcomplex subunit 8 OS=Mus musculus OX=10090 GN=Ndufa8 PE=1 SV=3	7092.55	5375.77	5253.05	8301.14	8067.2	5788.61	4483.9	2926.65	-0.277403	0.290328	0.431127	2	0.282144	0.901467	81.4261	81.3022	67.4943	69.4743	77.3476	68.232	-0.0950887
Q9DCL9	Paics	Multifunctional protein ADE2 OS=Mus musculus OX=10090 GN=Paics PE=1 SV=4	13507.1	11737.2	13274	11086.2	18070.8	30795.3	18546.1	31013.5	0.937069	0.00316092	0.0358539	4	-0.751527	0.525357	115.157	115.219	104.41	100.237	94.4522	102.043	-0.173327
Q9DCM2	Gstk1	Glutathione S-transferase kappa 1 OS=Mus musculus OX=10090 GN=Gstk1 PE=1 SV=3	18639.9	13001.6	10976.2	12323.9	6602.19	3301.57	7142.05	5016.72	-1.13716	0.00119914	0.0255527	2	0.907148	0.381998	47.6751	44.9172	39.9255	36.1888	41.1364	37.2805	-0.207811
Q9DCN2	Cyb5r3	NADH-cytochrome b5 reductase 3 OS=Mus musculus OX=10090 GN=Cyb5r3 PE=1 SV=3	229155	305537	192522	237794	223961	227380	399679	250333	0.0314598	0.505987	0.638192	9	-0.120837	0.840511	210.717	221.988	181.127	236.118	212.503	226.997	0.142292
Q9DCR2	Ap3s1	AP-3 complex subunit sigma-1 OS=Mus musculus OX=10090 GN=Ap3s1 PE=1 SV=2	15370.9	11179.2	8304.14	6349.25	9253.92	14913.3	7904.56	12022.6	0.130585	0.682183	0.77472	1	0.159858	0.919381	28.0444	31.641	26.6473	28.0695	28.0361	25.7053	-0.0750481
Q9DCS3	Mecr	"Enoyl-[acyl-carrier-protein] reductase, mitochondrial OS=Mus musculus OX=10090 GN=Mecr PE=1 SV=2"	21112.6	31414.5	28627.8	18067.8	29764.7	45778	25368.2	23937.5	0.160553	0.272038	0.414272	4	-0.227389	0.964611	55.6368	57.9652	44.481	53.7676	61.2812	49.4977	0.0617107
Q9DCS9	Ndufb10	NADH dehydrogenase [ubiquinone] 1 beta subcomplex subunit 10 OS=Mus musculus OX=10090 GN=Ndufb10 PE=1 SV=3	4753.3	15226.3	7028.15	10129.5	7184.71	4899.95	6585.1	2966.73	-0.570836	0.109634	0.22561	4	0.542277	0.381998	119.168	115.364	101.761	96.276	100.31	91.2852	-0.222069
[truncated: 190 more rows]
