# Supplementary figures and images for: Diet-induced loss of adipose hexokinase 2 correlates with hyperglycemia
Source: eLife journal article supplement (doi:10.7554/elife.85103), 2023-02-20

Figure 1B vWAT

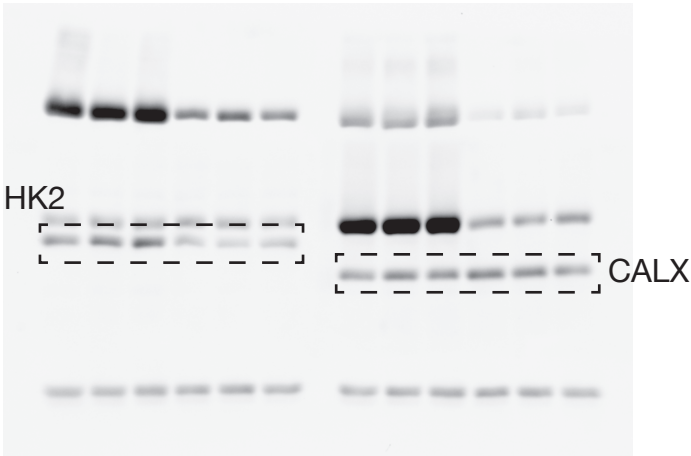

Figure 1B sWAT

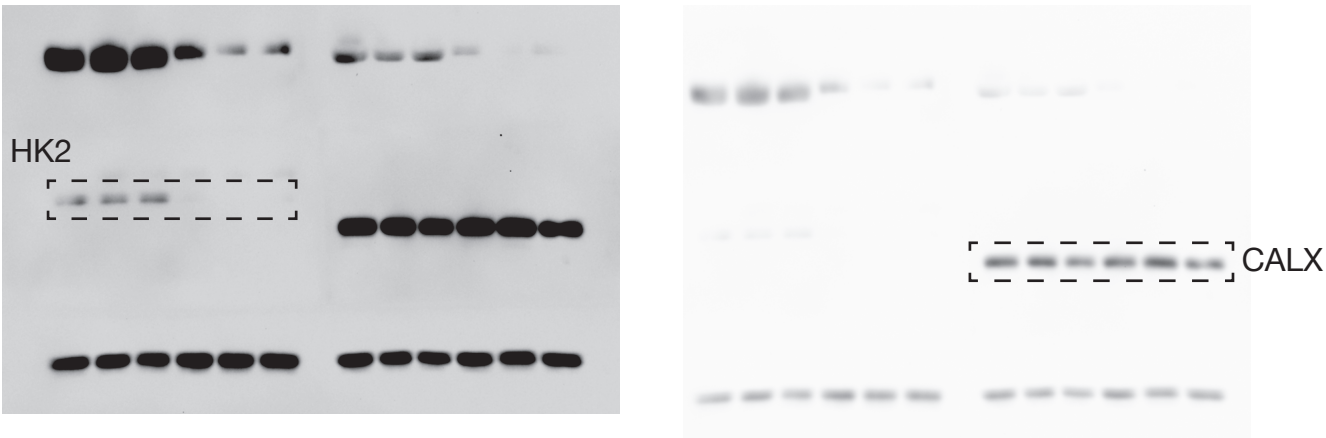

Figure 1B BAT

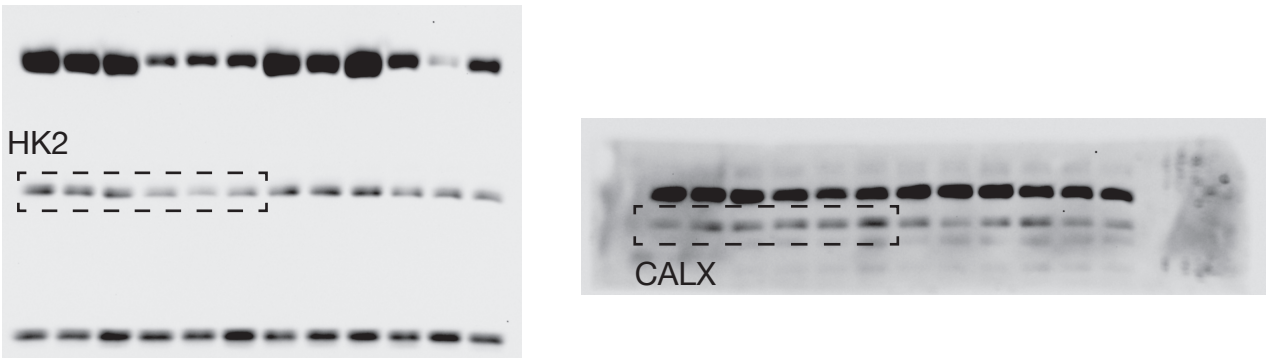

Figure 1B muscle

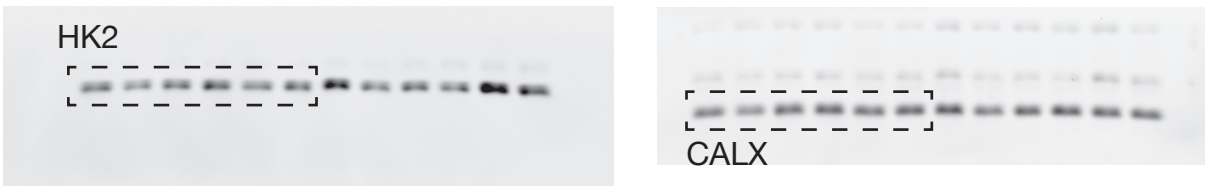

Supplement: fig1-data1 [file Figure 1B - source data.pdf › Figure 1 - source data/Figure 1B - source data.pdf]

Figure 1E vWAT

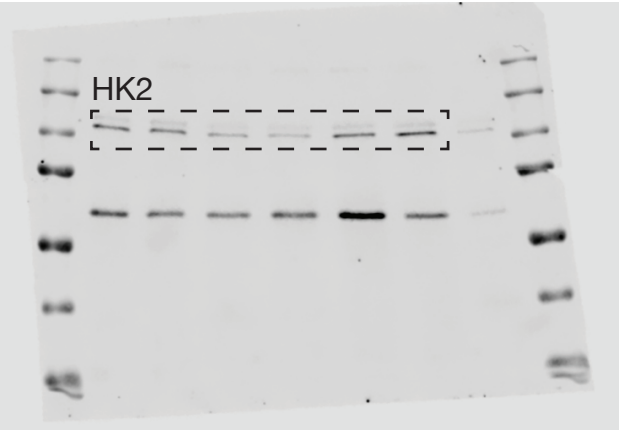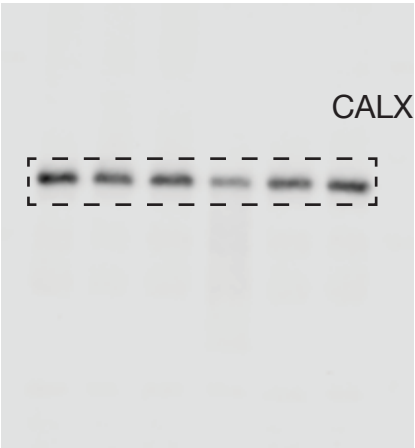

Figure 1F sWAT

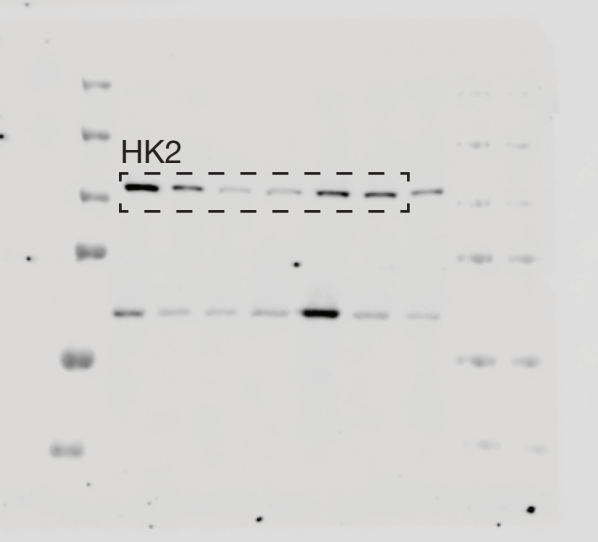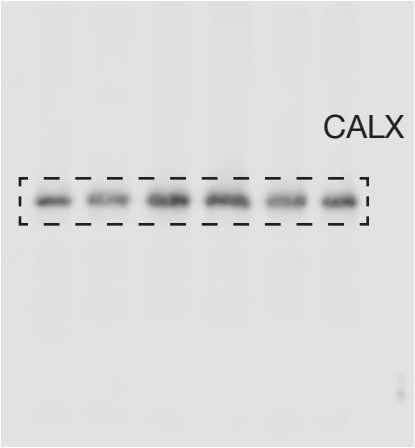

Supplement: fig1-data1 [file Figure1E-1F - source data.pdf › Figure 1 - source data/Figure1E-1F - source data.pdf]

Figure 1 - figure supplement 1F vWAT

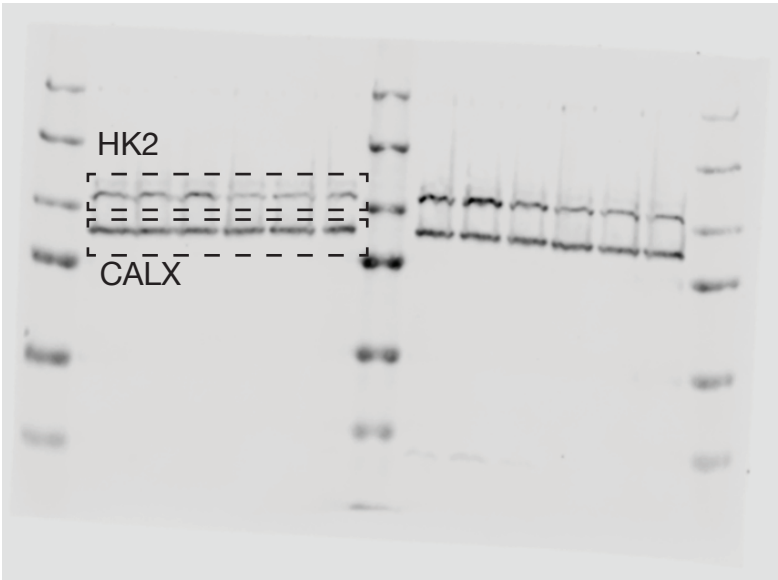

Figure 1 - figure supplement 1F sWAT

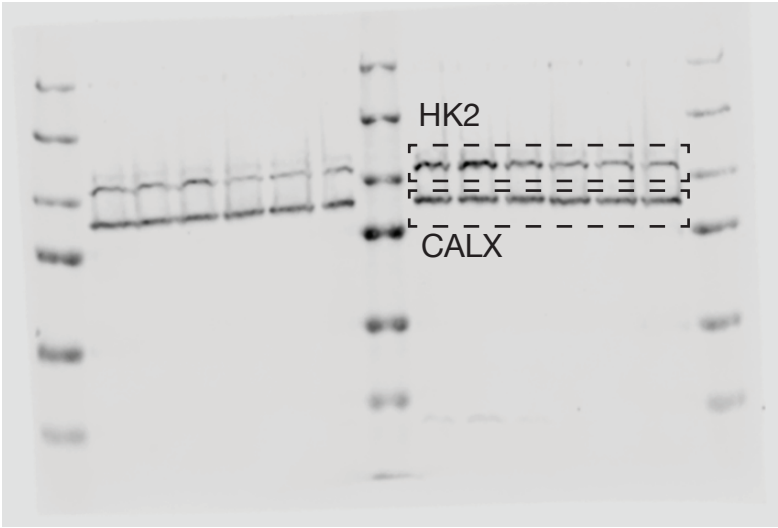

Supplement: fig1-figsupp1-data1 [file elife-85103-fig1-figsupp1-data1-v1.zip]

Figure 1 - figure supplement 1A

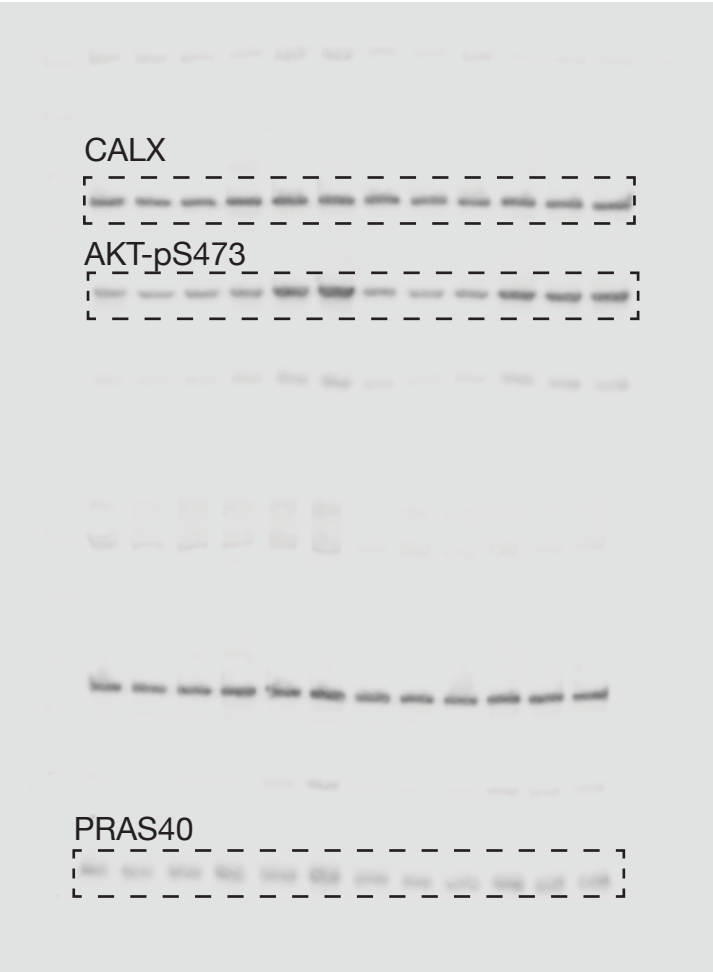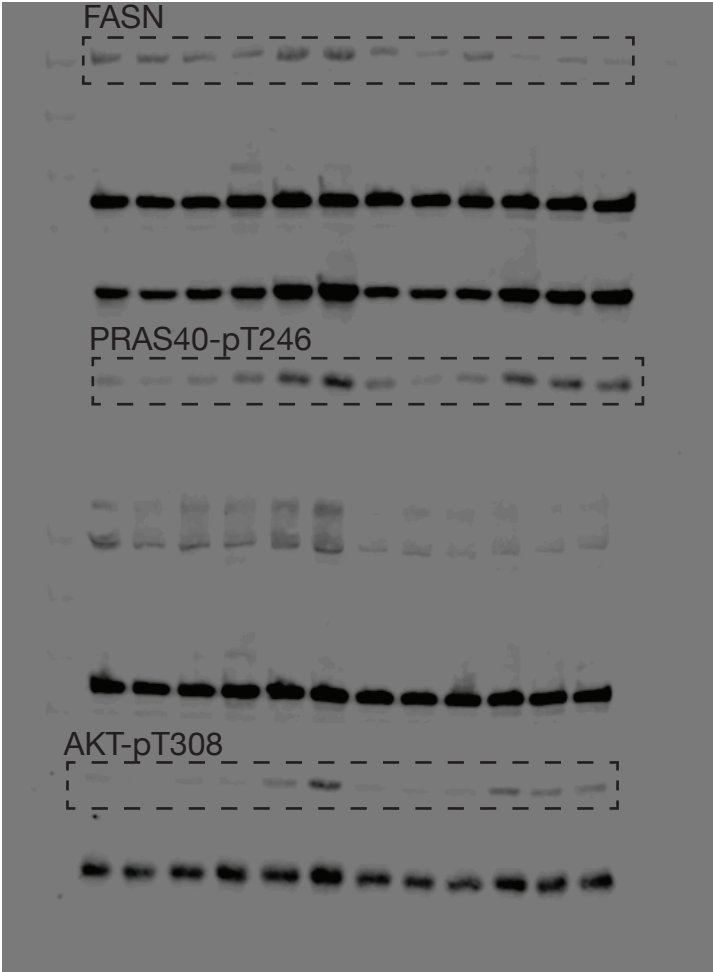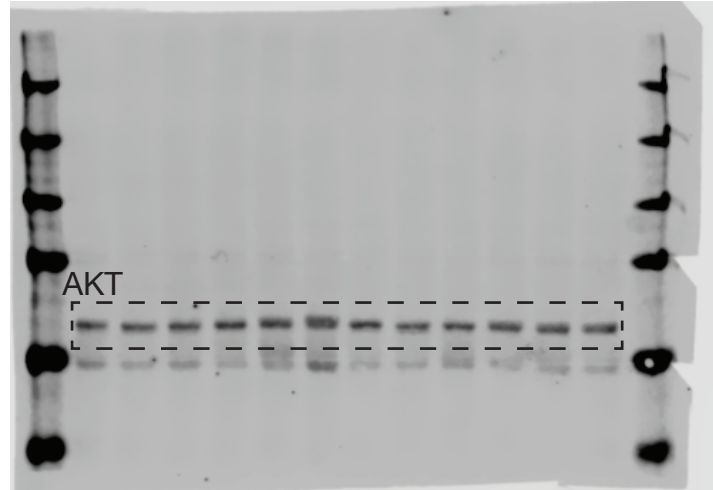

Supplement: fig1-figsupp1-data1 [file elife-85103-fig1-figsupp1-data1-v1.zip]

Figure 1 - figure supplement 2D

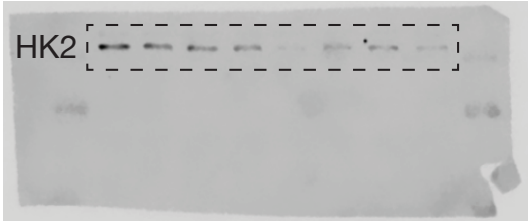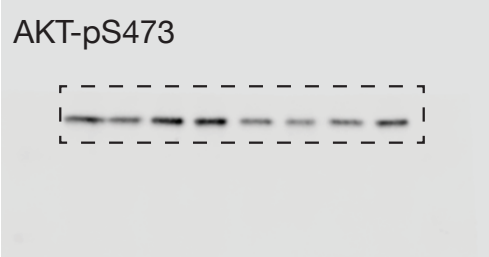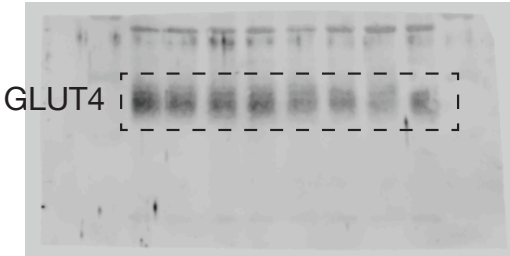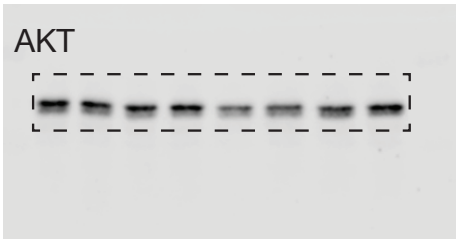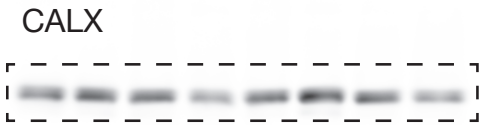

Figure 1 - figure supplement 2E

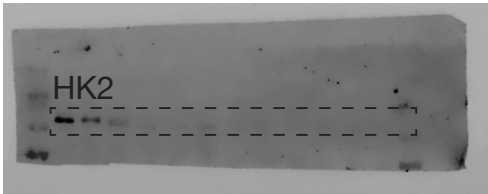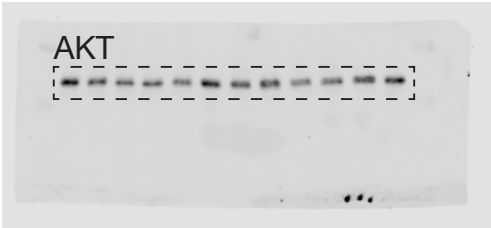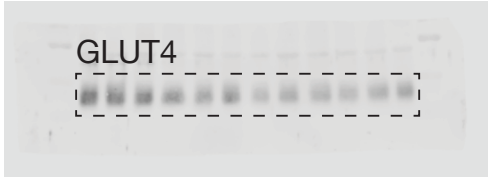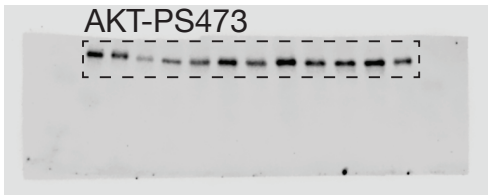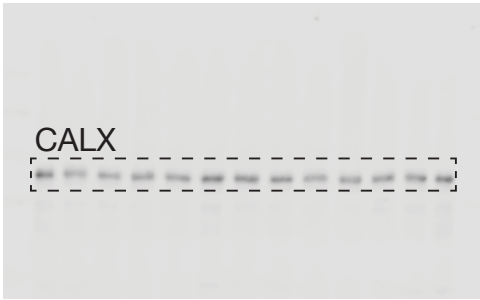

Figure 1 - figure supplement 2F

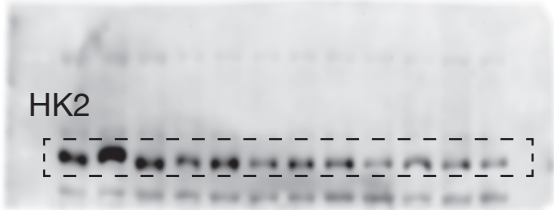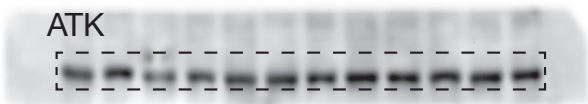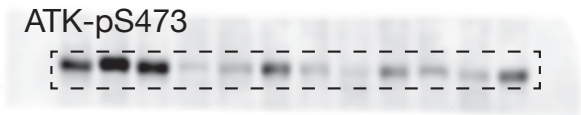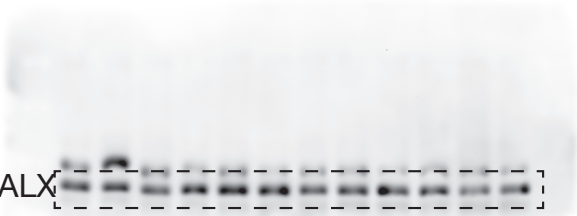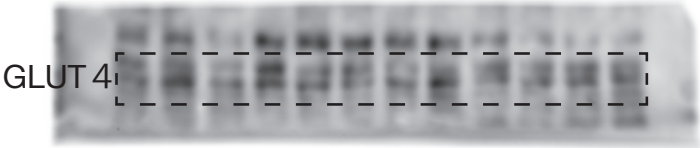

Supplement: fig1-figsupp2-data1 [file elife-85103-fig1-figsupp2-data1-v1.zip]

Figure 2F

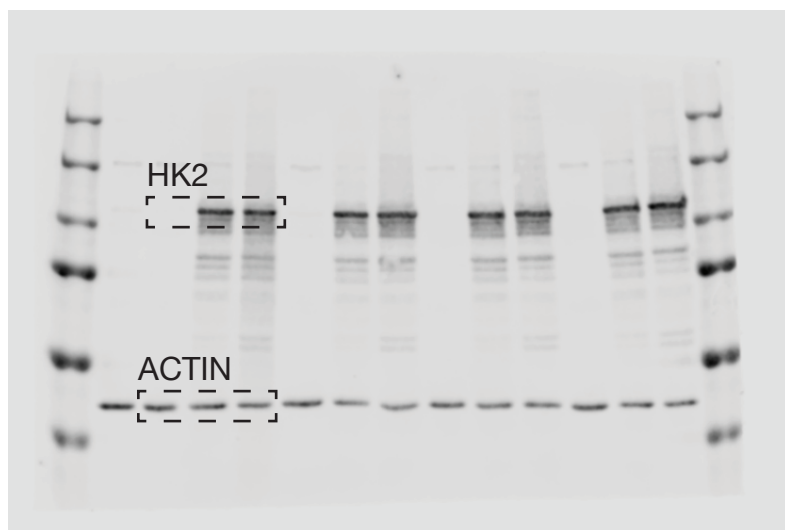

Supplement: fig2-data1 [file elife-85103-fig2-data1-v1.zip]

Figure 2G

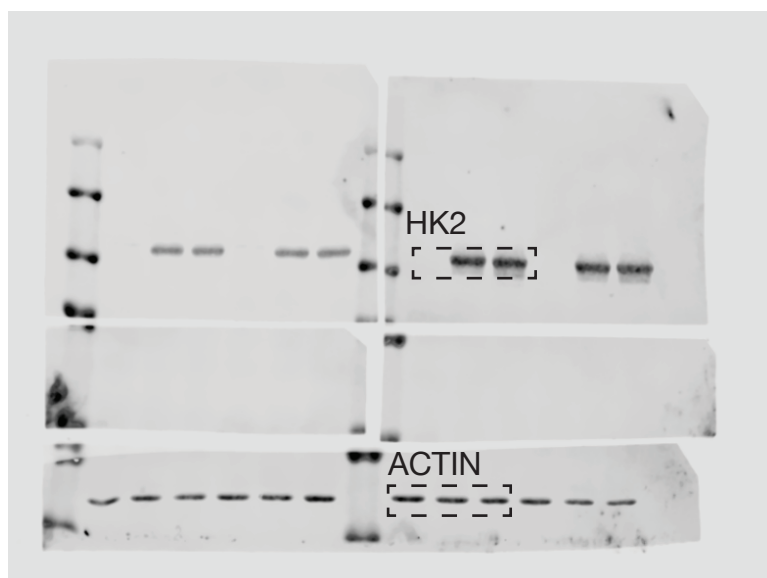

Supplement: fig2-data1 [file elife-85103-fig2-data1-v1.zip]

Figure 3A

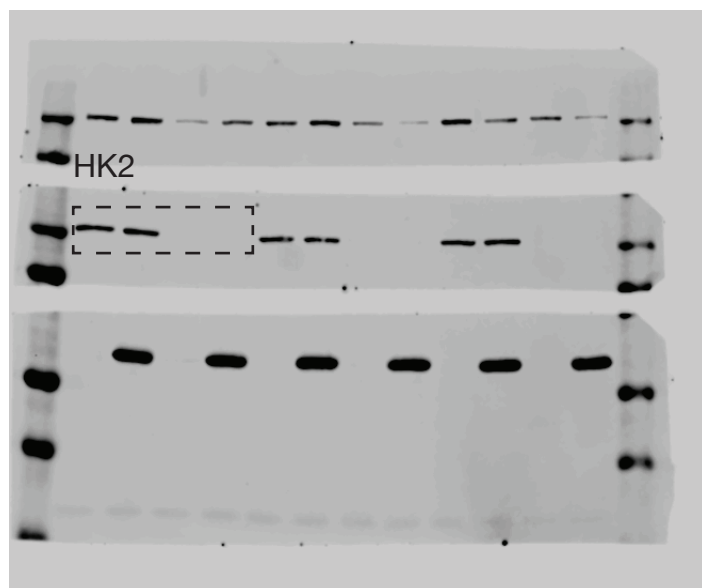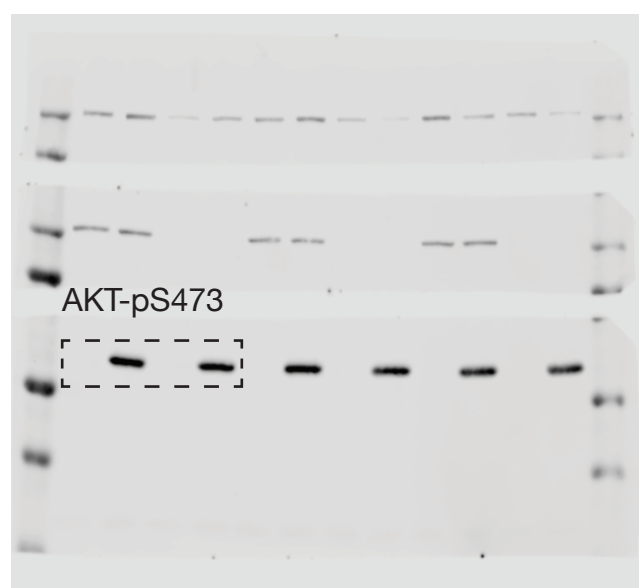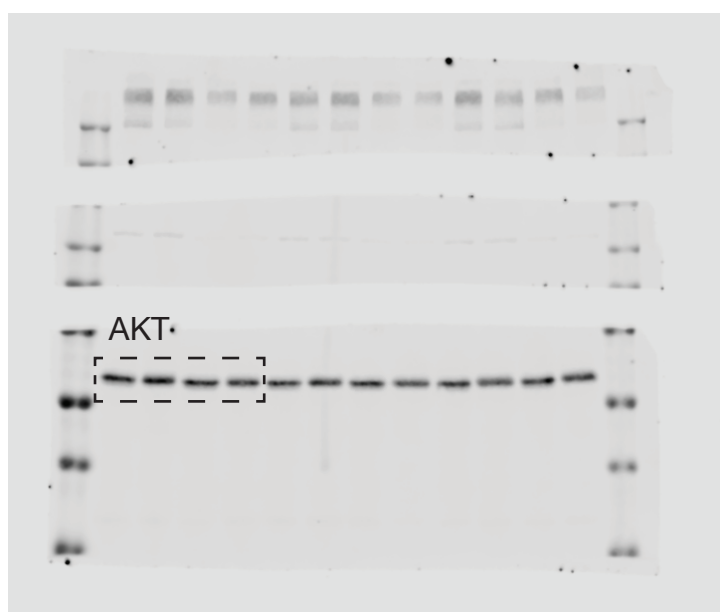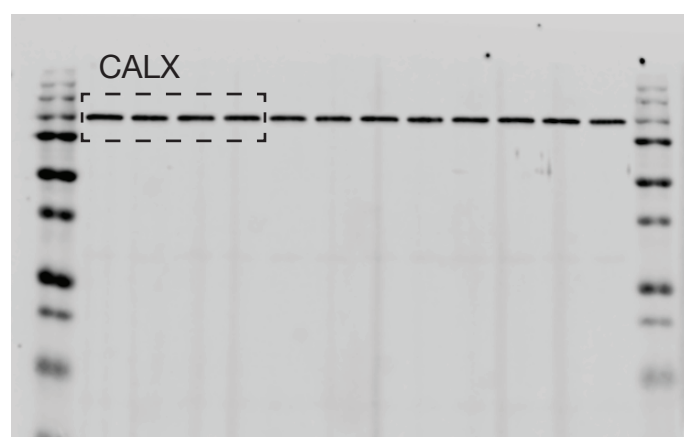

Supplement: fig3-data1 [file elife-85103-fig3-data1-v1.zip]

Figure 4A

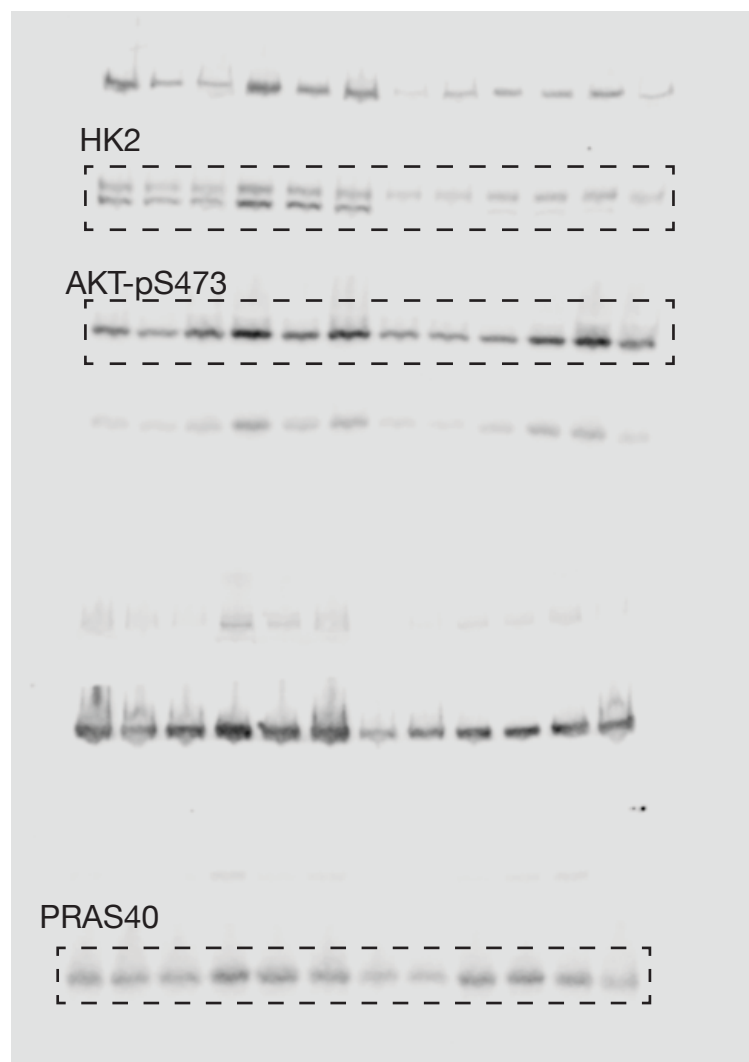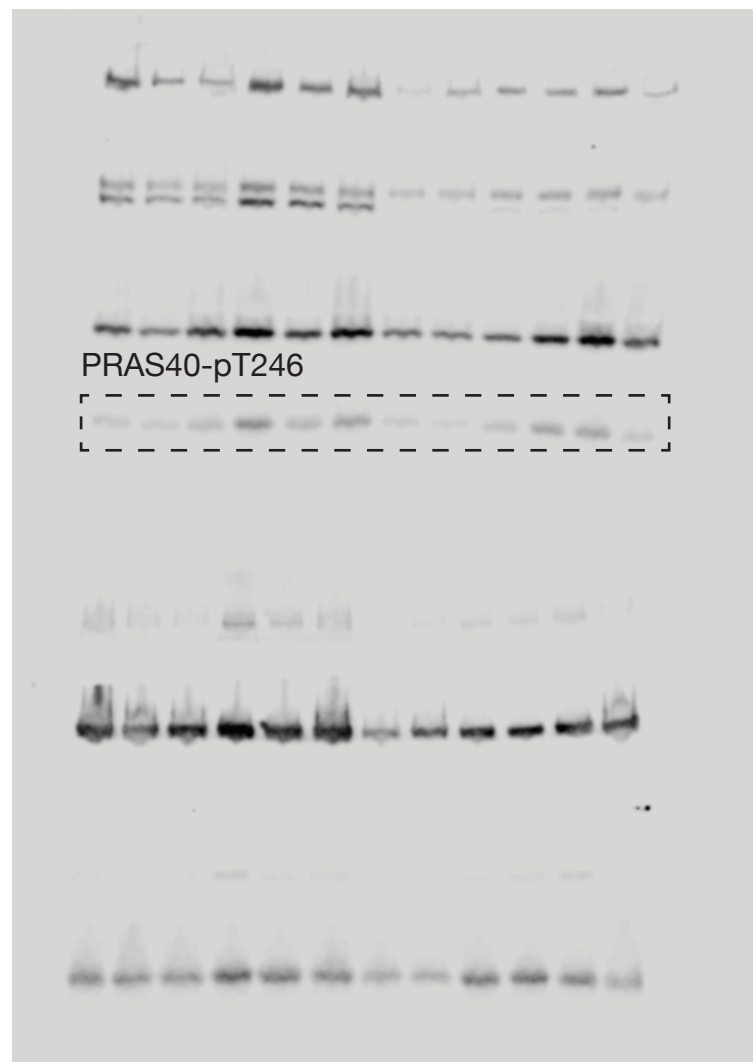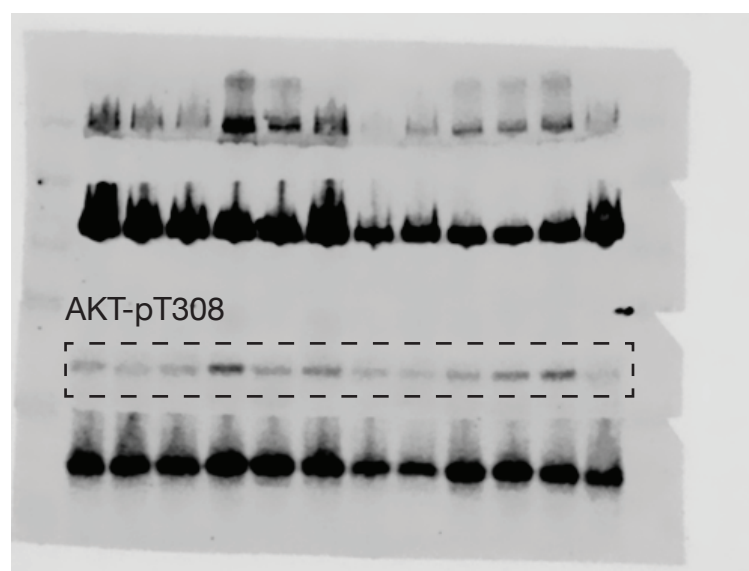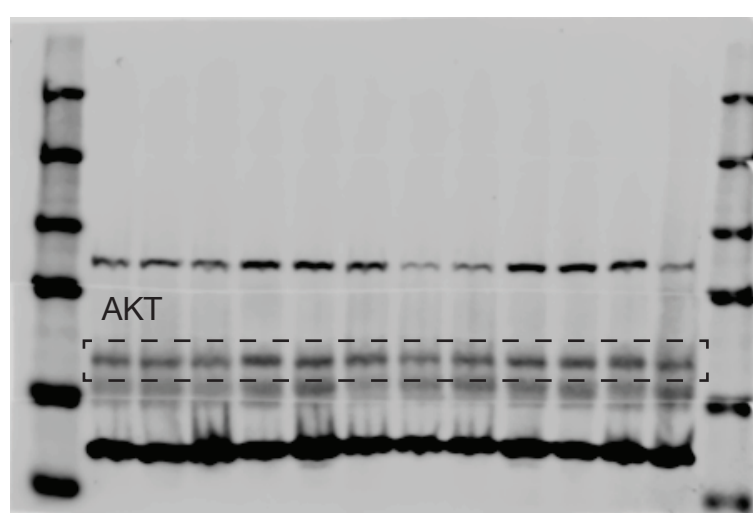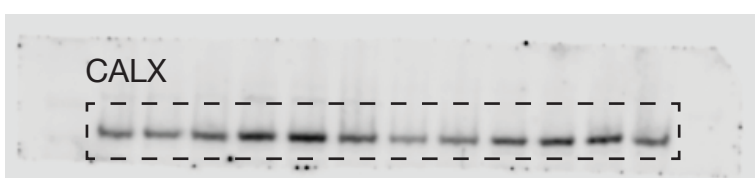

Supplement: fig4-data1 [file elife-85103-fig4-data1-v1.zip]

Figure 4- figure supplement 1B

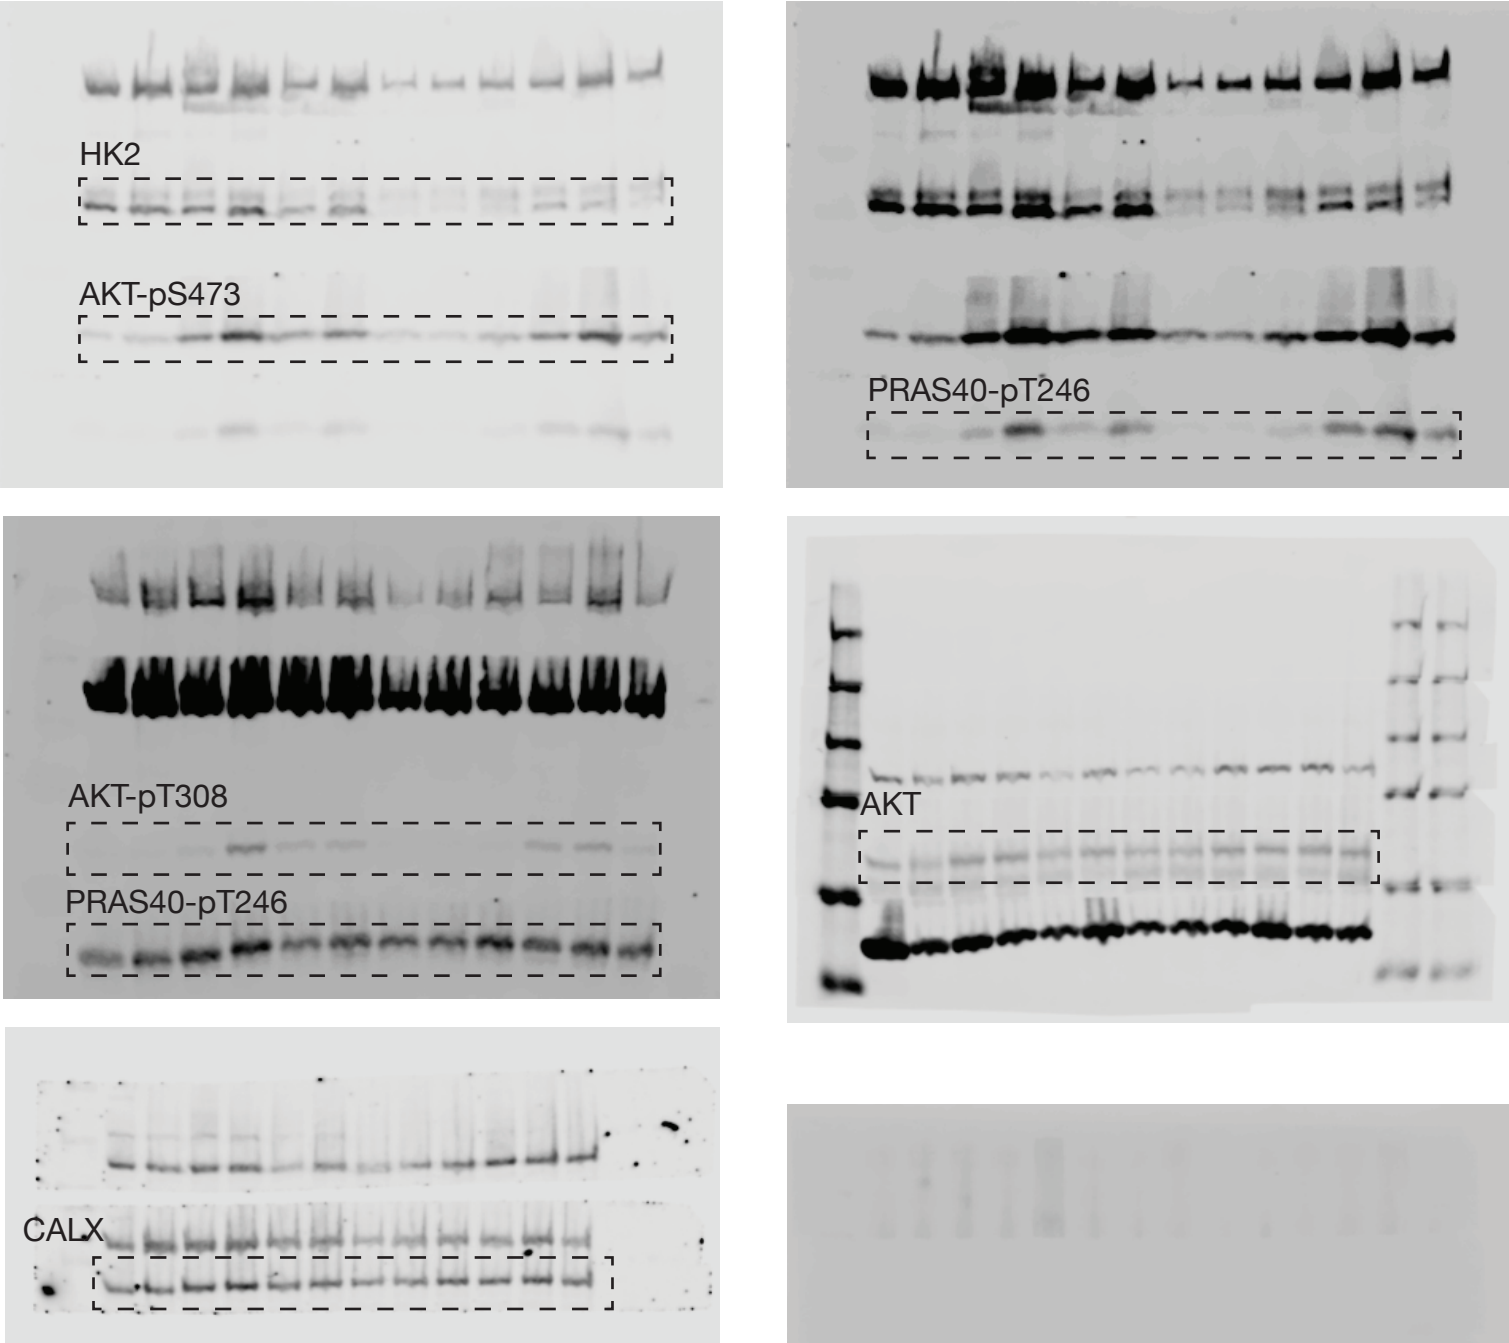

Figure 4- figure supplement 1C

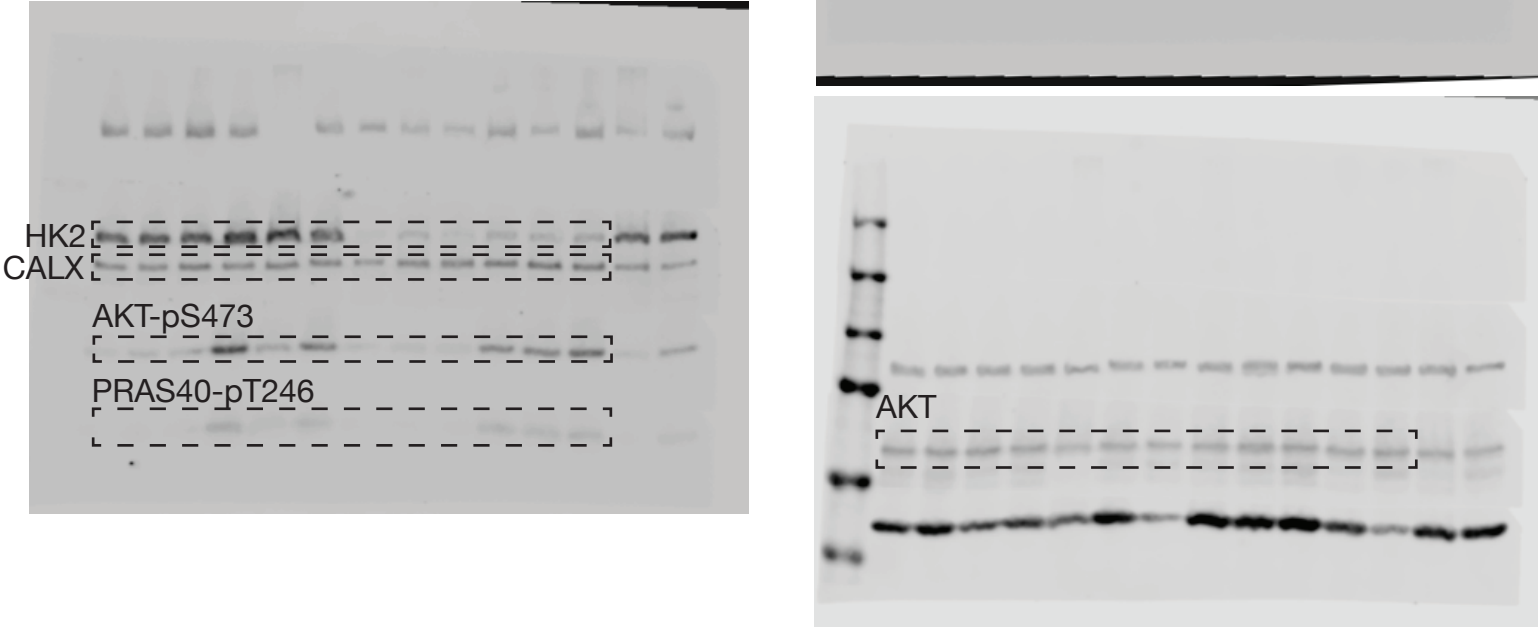

Supplement: fig4-figsupp1-data1 [file Figure 4- figure supplement 1B-C - source data.pdf › Figure 4 - figure supplement 1 - source data/Figure 4- figure supplement 1B-C - source data.pdf]

Figure 4- figure supplement 1D

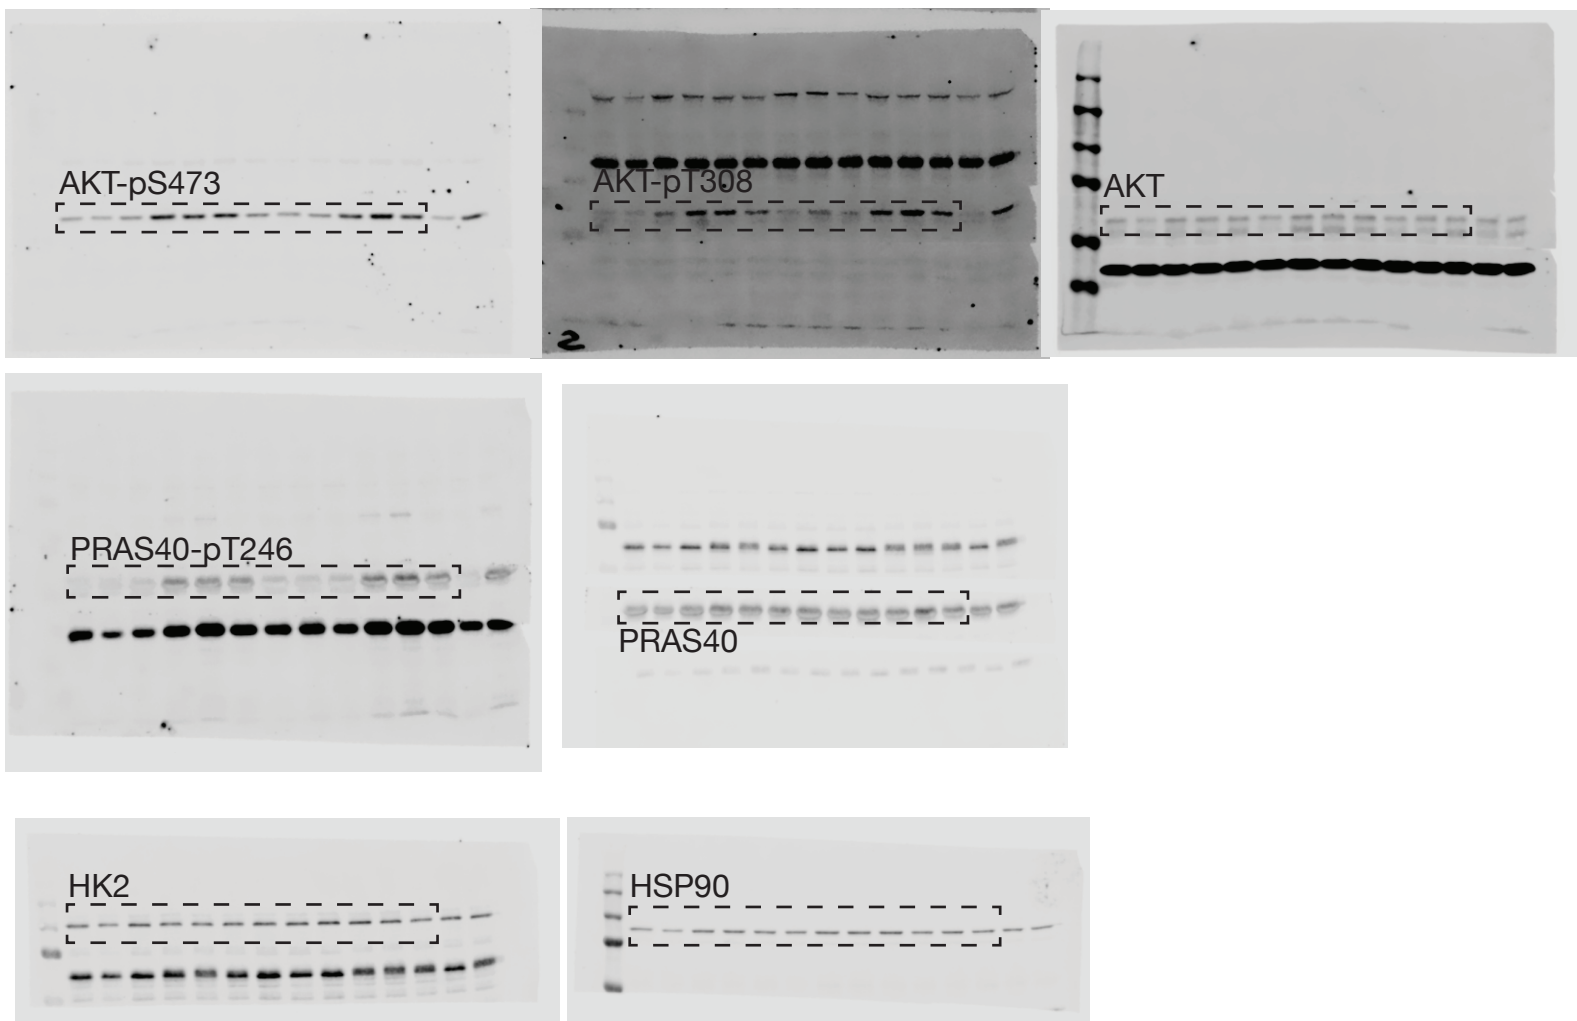

Supplement: fig4-figsupp1-data1 [file Figure 4- figure supplement 1D - source data.pdf › Figure 4 - figure supplement 1 - source data/Figure 4- figure supplement 1D - source data.pdf]
